# Supplementary material for: Local and Systemic Response to Heterogeneous Sulfate Resupply after Sulfur Deficiency in Rice
Source: Int J Mol Sci. 2022 May 31;23(11):6203. doi: 10.3390/ijms23116203 (PMC9181796; doi:10.3390/ijms23116203)
Supplement: Supplementary file 1 [file ijms-23-06203-s001.zip]

Archive with 9 entries (9 files):
- Supplemental Figures.pdf
- Table S1.xlsx
- Table S2.xlsx
- Table S3.xlsx
- Table S4.xlsx
- Table S5.xlsx
- Table S6.xlsx
- Table S7.xlsx
- Table S8.xlsx
