# Supplementary material for: Local and Systemic Response to Heterogeneous Sulfate Resupply after Sulfur Deficiency in Rice
Source: Int J Mol Sci. 2022 May 31;23(11):6203. doi: 10.3390/ijms23116203 (PMC9181796; doi:10.3390/ijms23116203)
Supplement: Supplementary file 1 [file ijms-23-06203-s001.zip › Table S1.xlsx]

## Sheet: Summary of RNAseq data
Table S1. Summary of RNA-seq data
Sample	Raw Reads	Clean Reads	Clean Bases	Q30	GC Content	Unique_Mapped	Multiple_Mapped	Exon	Intron	Intergenic
CK_Sh-1	47812348	47,726,872 (99.82%)	7143297696	6,597,736,745 (92.36%)	3,918,467,640 (54.86%)	42,904,307 (93.53%)	1,527,087 (3.33%)	40,217,538 (90.52%)	1,745,038 (3.93%)	2,468,818 (5.56%)
CK_Sh-2	41437576	41,364,582 (99.82%)	6189591118	5,742,685,680 (92.78%)	3,408,671,726 (55.07%)	35,015,119 (93.80%)	1,240,840 (3.32%)	32,508,097 (89.66%)	1,474,346 (4.07%)	2,273,516 (6.27%)
CK_Sh-3	46008836	45,927,086 (99.82%)	6872368559	6,346,593,664 (92.35%)	3,774,580,548 (54.92%)	40,907,972 (93.55%)	1,402,463 (3.21%)	38,380,570 (90.71%)	1,672,869 (3.95%)	2,256,996 (5.33%)
S0_Sh-1	50502358	50,415,754 (99.83%)	7543081656	6,938,033,660 (91.98%)	4,072,716,196 (53.99%)	45,933,472 (93.24%)	1,733,517 (3.52%)	43,283,729 (90.80%)	1,850,738 (3.88%)	2,532,522 (5.31%)
S0_Sh-2	56117564	56,018,018 (99.82%)	8384804804	7,678,319,806 (91.57%)	4,582,628,256 (54.65%)	50,168,079 (92.94%)	1,941,489 (3.60%)	47,260,208 (90.69%)	1,991,431 (3.82%)	2,857,929 (5.48%)
S0_Sh-3	61170312	61,063,140 (99.82%)	9134182493	8,450,625,073 (92.52%)	5,029,044,250 (55.06%)	55,112,750 (93.06%)	2,095,303 (3.54%)	51,777,719 (90.51%)	2,206,425 (3.86%)	3,223,909 (5.64%)
SR_Sh-1	44139600	44,062,180 (99.82%)	6592492221	6,077,876,308 (92.19%)	3,631,420,873 (55.08%)	40,103,409 (93.22%)	1,404,616 (3.26%)	37,454,973 (90.24%)	1,600,888 (3.86%)	2,452,164 (5.91%)
SR_Sh-2	54318118	54,245,618 (99.87%)	8117023040	7,720,472,455 (95.11%)	4,432,568,326 (54.61%)	49,859,939 (93.82%)	1,755,846 (3.30%)	46,406,073 (89.91%)	2,084,754 (4.04%)	3,124,958 (6.05%)
SR_Sh-3	55181774	55,087,130 (99.83%)	8242072597	7,617,755,152 (92.43%)	4,484,820,369 (54.41%)	49,782,043 (92.81%)	1,801,295 (3.36%)	46,317,584 (89.79%)	2,104,471 (4.08%)	3,161,283 (6.13%)
SP_Sh-1	50584536	50,489,458 (99.81%)	7557018977	6,906,598,434 (91.39%)	4,139,298,810 (54.77%)	46,094,041 (93.28%)	1,588,316 (3.21%)	42,841,252 (89.85%)	1,938,692 (4.07%)	2,902,413 (6.09%)
SP_Sh-2	60266484	60,154,058 (99.81%)	9003385713	8,301,986,752 (92.21%)	4,861,966,819 (54.00%)	53,716,779 (93.40%)	1,915,432 (3.33%)	49,736,950 (89.40%)	2,347,679 (4.22%)	3,547,582 (6.38%)
SP_Sh-3	44621110	44,552,404 (99.85%)	6665064662	6,190,873,492 (92.89%)	3,692,873,086 (55.41%)	40,791,152 (93.84%)	1,398,735 (3.22%)	38,285,515 (90.75%)	1,517,120 (3.60%)	2,387,252 (5.66%)
CK_R-1	47851880	47,773,182 (99.84%)	7151458709	6,567,796,516 (91.84%)	3,972,240,873 (55.54%)	37,397,450 (89.77%)	1,756,488 (4.22%)	36,063,661 (92.11%)	1,285,667 (3.28%)	1,804,610 (4.61%)
CK_R-2	48684864	48,608,742 (99.84%)	7276116199	6,708,564,877 (92.20%)	4,074,527,905 (56.00%)	38,787,303 (88.43%)	1,865,211 (4.25%)	37,594,108 (92.48%)	1,295,451 (3.19%)	1,762,955 (4.34%)
CK_R-3	67390086	67,276,564 (99.83%)	10068483599	9,291,988,597 (92.29%)	5,468,440,638 (54.31%)	57,185,549 (86.26%)	2,640,487 (3.98%)	54,303,103 (90.77%)	2,346,781 (3.92%)	3,176,152 (5.31%)
S0_R-1	58150120	58,027,868 (99.79%)	8687199030	7,963,039,173 (91.66%)	4,824,950,353 (55.54%)	45,780,457 (87.28%)	2,277,307 (4.34%)	44,158,024 (91.89%)	1,386,413 (2.88%)	2,513,327 (5.23%)
S0_R-2	58844664	58,727,010 (99.80%)	8793577674	7,972,428,939 (90.66%)	4,903,003,273 (55.76%)	47,169,591 (87.12%)	2,461,147 (4.55%)	45,669,387 (92.02%)	1,401,977 (2.82%)	2,559,374 (5.16%)
S0_R-3	44708764	44,637,836 (99.84%)	6675558776	6,179,246,113 (92.57%)	3,646,785,102 (54.63%)	36,153,369 (83.85%)	1,738,502 (4.03%)	34,563,459 (91.22%)	1,241,091 (3.28%)	2,087,321 (5.51%)
SR_R-1	54619522	54,524,912 (99.83%)	8163980265	7,527,043,257 (92.20%)	4,570,644,174 (55.99%)	44,804,819 (86.98%)	2,250,824 (4.37%)	43,536,173 (92.52%)	1,292,320 (2.75%)	2,227,150 (4.73%)
SR_R-2	56241512	56,153,668 (99.84%)	8405174293	7,705,231,423 (91.67%)	4,709,734,619 (56.03%)	41,158,969 (83.89%)	1,964,716 (4.00%)	39,786,081 (92.26%)	1,194,246 (2.77%)	2,143,358 (4.97%)
SR_R-3	36790012	36,732,894 (99.84%)	5492898879	5,112,574,171 (93.08%)	2,972,748,638 (54.12%)	30,095,528 (85.03%)	1,351,602 (3.82%)	28,628,748 (91.04%)	1,106,525 (3.52%)	1,711,857 (5.44%)
SPSR_R-1	44949390	44,864,556 (99.81%)	6715599829	6,189,869,060 (92.17%)	3,672,251,280 (54.68%)	32,419,205 (78.88%)	1,358,882 (3.31%)	28,676,814 (91.59%)	884,710 (2.83%)	1,750,013 (5.59%)
SPSR_R-2	42701888	42,619,416 (99.81%)	6376535068	5,889,247,953 (92.36%)	3,508,443,825 (55.02%)	31,362,637 (78.58%)	1,230,489 (3.08%)	27,707,612 (91.76%)	852,054 (2.82%)	1,637,536 (5.42%)
SPSR_R-3	55295012	55,205,038 (99.84%)	8259286594	7,631,308,449 (92.40%)	4,458,115,536 (53.98%)	41,592,092 (77.25%)	1,946,146 (3.61%)	39,736,882 (91.27%)	1,377,024 (3.16%)	2,424,332 (5.57%)
SPS0_R-1	61498484	61,390,936 (99.83%)	9188166012	8,478,343,053 (92.27%)	5,098,780,027 (55.49%)	44,589,664 (82.40%)	2,169,444 (4.01%)	42,877,038 (91.70%)	1,248,767 (2.67%)	2,633,303 (5.63%)
SPS0_R-2	60307402	60,200,016 (99.82%)	9006621938	8,291,795,450 (92.06%)	4,982,901,258 (55.32%)	42,547,937 (80.93%)	2,105,155 (4.00%)	40,771,672 (91.31%)	1,213,695 (2.72%)	2,667,725 (5.97%)
SPS0_R-3	49873850	49,799,158 (99.85%)	7450659950	6,919,274,108 (92.87%)	4,033,025,871 (54.13%)	39,676,325 (81.20%)	1,876,031 (3.84%)	37,753,504 (90.86%)	1,314,530 (3.16%)	2,484,322 (5.98%)
