# Supplementary material for: Local and Systemic Response to Heterogeneous Sulfate Resupply after Sulfur Deficiency in Rice
Source: Int J Mol Sci. 2022 May 31;23(11):6203. doi: 10.3390/ijms23116203 (PMC9181796; doi:10.3390/ijms23116203)
Supplement: Supplementary file 1 [file ijms-23-06203-s001.zip › Table S2.xlsx]

## Sheet: S0_Sh vs CK_Sh
Table S2. DEGs in response to sulfur deficiency in shoots
Gene ID	CK_Sh-1 _fpkm	CK_Sh-2 _fpkm	CK_Sh-3 _fpkm	S0_Sh-1 _fpkm	S0_Sh-2 _fpkm	S0_Sh-3 _fpkm	CK_Sh _mean	S0_Sh _mean	log2(fold chang)	P_Value	FDR	Regulation Pattern	Annatation
Os02g0603100	0	0	0	3.58	0	4.38	0.001	2.65333	11.3736	0.00857887	0.043405	Up	fasciated ear2 putative expressed
Os11g0642400	0	0	0	1	1.2	3.94	0.001	2.04667	10.9991	5.18539e-12	3.29377e-10	Up	transferase family protein putative expressed
Os01g0586800	0	0	0	0.65	0.78	1.49	0.001	0.973333	9.92679	9.8615e-07	2.04998e-05	Up	WRKY27 expressed
Os07g0251301	0	0	0	1.17	1.27	0.42	0.001	0.953333	9.89684	0.000421426	0.00368766	Up	60S acidic ribosomal protein putative expressed
MSTRG.13107	0	0	0	0.8	0.58	1.11	0.001	0.83	9.69697	2.05741e-06	3.92988e-05	Up	PREDICTED: stemar-13-ene synthase-like [Oryza sativa Japonica Group]
Os01g0153600	0	0	0	0.55	0.77	1.07	0.001	0.796667	9.63783	3.70089e-07	8.75465e-06	Up	expressed protein
Os05g0500000	0	0	0	1.64	0.32	0.36	0.001	0.773333	9.59495	2.03541e-07	5.14734e-06	Up	UDP-glucoronosyl FUDP-glucosyl transferase putative expressed
MSTRG.30983	0	0	0	0.33	0.66	1.05	0.001	0.68	9.40939	3.7545e-05	0.000476723	Up	--
Os02g0114800	0	0	0	0	0.49	1.27	0.001	0.586667	9.1964	0.00815613	0.0416497	Up	myb-like DNA-binding domain containing protein putative expressed
MSTRG.21576	0	0	0	0.93	0.22	0.42	0.001	0.523333	9.03159	4.29004e-05	0.000534929	Up	PREDICTED: CSC1-like protein At1g32090 [Oryza sativa Japonica Group]
Os04g0206650	0	0	0	0.4	0.62	0.49	0.001	0.503333	8.97537	4.11684e-07	9.55571e-06	Up	--
MSTRG.4680	0	0	0	0.81	0.48	0.2	0.001	0.496667	8.95613	0.000739296	0.0058858	Up	--
Os09g0452700	0.59	0.32	0.52	240.35	208.96	105.71	0.476667	185.007	8.60038	2.55616e-127	2.52753e-123	Up	ubiquitin fusion protein putative expressed
Os07g0489000	0	0	0	0.18	0.22	0.76	0.001	0.386667	8.59495	0.000782051	0.0061781	Up	LTPL55 - Protease inhibitor Fseed storage FLTP family protein precursor putative expressed
Os01g0731700	0	0	0	0.41	0.32	0.39	0.001	0.373333	8.54432	0.000448981	0.00387731	Up	--
Os10g0116701	0	0	0	0.34	0.31	0.45	0.001	0.366667	8.51833	1.97702e-05	0.000275206	Up	OsWAK99 - OsWAK receptor-like protein kinase expressed
Os01g0698800	0	0	0	0.22	0.28	0.58	0.001	0.36	8.49185	0.000402141	0.00355728	Up	expressed protein
Os03g0807600	0	0	0	0.22	0.43	0.41	0.001	0.353333	8.46489	0.000155831	0.00160841	Up	C-methyltransferase putative expressed
Os09g0483200	0.34	0.24	0	110.2	68.99	25.35	0.193333	68.18	8.46211	4.16778e-15	3.9626e-13	Up	ubiquitin fusion protein putative expressed
MSTRG.5654	0	0	0	0.57	0.34	0.14	0.001	0.35	8.45121	4.88545e-10	2.19579e-08	Up	--
MSTRG.12165	0	0	0	0.14	0.13	0.69	0.001	0.32	8.32193	0.000355493	0.00321056	Up	--
Os11g0100200	0	0	0	0.17	0.38	0.34	0.001	0.296667	8.2127	0.000488353	0.00416758	Up	RNA recognition motif containing protein putative expressed
MSTRG.33179	0	0	0	0	0.51	0.33	0.001	0.28	8.12928	0.00337484	0.0206373	Up	--
Os07g0625500	0	0.08	0	6.18	12.56	3.52	0.0266667	7.42	8.12024	1.84887e-13	1.43949e-11	Up	SKP1-like protein 1B putative expressed
Os02g0824100	0	0	0	0.34	0.19	0.28	0.001	0.27	8.07682	2.92513e-05	0.000384965	Up	cytochrome P450 putative expressed
Os04g0359700	0	0	0	0.23	0.14	0.32	0.001	0.23	7.84549	0.000548188	0.00460273	Up	dehydrogenase putative expressed
Os01g0723025	0	0	0	0.1	0.33	0.25	0.001	0.226667	7.82443	4.31751e-06	7.38117e-05	Up	--
Os10g0525200	0	0	0	0.11	0.34	0.19	0.001	0.213333	7.73697	0.000120675	0.00130171	Up	cytochrome P450 putative expressed
Os12g0191300	0	0	0	0.15	0	0.46	0.001	0.203333	7.6677	0.00781417	0.0403059	Up	expressed protein
Os11g0431400	0	0	0	0.12	0.29	0.14	0.001	0.183333	7.51833	0.00110197	0.00823811	Up	OsSCP53 - Putative Serine Carboxypeptidase homologue expressed
Os01g0890250	0	0	0	0.07	0.21	0.24	0.001	0.173333	7.43741	0.000242884	0.00234535	Up	--
Os07g0625600	0.34	0	0	20.08	24.55	10.5	0.113333	18.3767	7.34116	4.03612e-07	9.41993e-06	Up	SKP1-like protein 1B putative expressed
Os04g0611700	0	0	0	0.37	0.06	0.02	0.001	0.15	7.22882	0.00215525	0.0143671	Up	terpene synthase putative expressed
MSTRG.21891	0.04	0.03	0	2.36	3.95	2.02	0.0233333	2.77667	6.89482	9.87865e-24	2.32572e-21	Up	--
Os12g0457500	0	0	0	0.13	0.1	0.11	0.001	0.113333	6.82443	0.000443474	0.00383981	Up	expressed protein
Os09g0483400	13.45	10.3	13.36	1219.92	1488.59	1081.89	12.37	1263.47	6.6744	0	0	Up	ubiquitin family protein putative expressed
Os07g0218200	0.21	0.06	0.15	4.78	10.17	23.05	0.14	12.6667	6.49947	1.73386e-15	1.71445e-13	Up	terpene synthase putative expressed
Os10g0386300	0.92	0.42	1.05	54.44	109.74	41.74	0.796667	68.64	6.42893	1.35987e-30	5.60265e-28	Up	expressed protein
Os03g0259500	1.73	1.8	2.09	156.36	220.79	90.48	1.87333	155.877	6.37865	8.42868e-99	3.57183e-95	Up	ubiquitin fusion protein putative expressed
Os04g0204100	0.22	0.36	0.05	14.51	20.47	8.4	0.21	14.46	6.10553	7.21487e-16	7.43131e-14	Up	indole-3-acetate beta-glucosyltransferase putative expressed
Os01g0280500	0.16	0.47	0.28	19.03	25.33	16.41	0.303333	20.2567	6.06135	3.01582e-71	5.96409e-68	Up	eukaryotic translation initiation factor 6 putative expressed
Os01g0723000	0.71	0.43	0.07	25.5	36	18.48	0.403333	26.66	6.04656	1.1262e-12	7.8238e-11	Up	elongation factor putative expressed
Os02g0749700	0	0.06	0	0.36	0.69	2.89	0.02	1.31333	6.03709	0.000549424	0.0046105	Up	laccase precursor protein putative expressed
Os02g0491300	0.03	0	0	0.43	0.91	0.38	0.01	0.573333	5.8413	1.51233e-06	2.98085e-05	Up	expressed protein
Os09g0483300	0.18	0.18	0.16	8.82	11.03	9.9	0.173333	9.91667	5.83823	2.11729e-35	1.18505e-32	Up	EF hand family protein expressed
Os04g0204150	0.38	0.12	0	8.53	12.33	4.97	0.166667	8.61	5.69098	5.15563e-06	8.61477e-05	Up	--
Os09g0344400	0.08	0.08	0	2.5	2.65	2.18	0.0533333	2.44333	5.51767	2.9464e-20	4.93797e-18	Up	OsFBX322 - F-box domain containing protein expressed
Os04g0206600	0.44	0.56	0.19	19.31	24.09	11.03	0.396667	18.1433	5.51537	2.76352e-52	2.92775e-49	Up	UDP-glucoronosyl FUDP-glucosyl transferase putative expressed
Os01g0653500	0	0.05	0	0.65	0.94	0.57	0.0166667	0.72	5.43296	5.60735e-06	9.27699e-05	Up	expressed protein
Os07g0440900	0.06	0.03	0.04	2.28	1.74	1.54	0.0433333	1.85333	5.4185	8.80533e-33	4.28199e-30	Up	expressed protein
MSTRG.33177	0	0.02	0	0.46	0.22	0.16	0.00666667	0.28	5.39232	4.69994e-05	0.000577783	Up	--
Os10g0380800	0.03	0	0.03	0.53	0.37	1.59	0.02	0.83	5.37504	5.38425e-07	1.21091e-05	Up	decarboxylase putative expressed
Os02g0179600	1.58	1.31	0.7	41.01	63.35	42.51	1.19667	48.9567	5.35441	6.63944e-89	1.79048e-85	Up	gp176 putative expressed
Os04g0252850	0.04	0	0	0.32	1.1	0.12	0.0133333	0.513333	5.26679	0.00303414	0.0189086	Up	--
Os04g0659200	0.02	0.17	0.09	3.4	2.39	3.6	0.0933333	3.13	5.06763	1.27792e-28	4.45978e-26	Up	retrotransposon protein putative unclassified expressed
Os09g0368200	0.07	0	0.19	1.27	1.3	5.63	0.0866667	2.73333	4.97904	0.000141531	0.00148667	Up	polyamine oxidase precursor putative expressed
Os02g0720400	0.08	0.32	0.16	2.86	5.55	7.93	0.186667	5.44667	4.86684	5.15189e-18	6.64459e-16	Up	plant-specific domain TIGR01615 family protein expressed
Os05g0584900	0.03	0.01	0.01	0.33	0.39	0.72	0.0166667	0.48	4.848	5.39673e-07	1.21279e-05	Up	C4-dicarboxylate transporter Fmalic acid transport protein expressed
Os01g0910800	0.57	0.54	0.18	8.49	14.11	13.6	0.43	12.0667	4.81055	3.92627e-29	1.43789e-26	Up	expressed protein
Os03g0165900	0.76	0.7	1.51	24.79	33.01	23.64	0.99	27.1467	4.7772	3.08539e-63	4.57625e-60	Up	tetratricopeptide repeat domain containing protein expressed
Os09g0570150	0.05	0	0	0.29	0.51	0.57	0.0166667	0.456667	4.7761	0.000783687	0.00618937	Up	--
MSTRG.4893	0.04	0	0	0.54	0.13	0.4	0.0133333	0.356667	4.74147	0.00231055	0.0151805	Up	--
Os05g0311801	0	0	0.05	0.31	0.65	0.37	0.0166667	0.443333	4.73335	0.000906394	0.00699643	Up	IPP transferase putative expressed
Os12g0191601	0.77	0.27	0.12	8.52	12.17	8.7	0.386667	9.79667	4.66313	6.31825e-13	4.58251e-11	Up	expressed protein
Os07g0113600	0	0.04	0	0.17	0.58	0.2	0.0133333	0.316667	4.56986	0.000712043	0.00570249	Up	OsFBX208 - F-box domain containing protein expressed
MSTRG.19551	0.06	0.17	0.24	3.7	4.6	2.4	0.156667	3.56667	4.50881	1.3255e-15	1.32966e-13	Up	hypothetical protein [Oryza sativa Japonica Group]
Os10g0400500	0.16	0.04	0.22	3.16	3.29	2.88	0.14	3.11	4.47342	2.86054e-24	7.25256e-22	Up	decarboxylase putative expressed
Os12g0247700	12.15	8.74	9.62	136.96	203.51	312.82	10.17	217.763	4.42037	2.70482e-63	4.22293e-60	Up	Jacalin-like lectin domain containing protein putative expressed
Os09g0342000	0.14	0.15	0.16	2.8	4.04	2.34	0.15	3.06	4.3505	2.04794e-22	4.24826e-20	Up	OsFBX320 - F-box domain containing protein expressed
MSTRG.2270	0	0	0.11	0.72	1.08	0.42	0.0366667	0.74	4.33498	0.000120926	0.00130307	Up	Oligopeptide transporter 7 [Morus notabilis]
Os08g0413100	0.04	0	0	0.43	0.05	0.32	0.0133333	0.266667	4.32193	0.00978748	0.0482654	Up	expressed protein
Os12g0240900	0.36	0.27	0	2.95	3.47	5.84	0.21	4.08667	4.28246	0.000279086	0.00262665	Up	O-methyltransferase putative expressed
Os08g0374600	0.35	0.65	0	5.38	3.96	10.07	0.333333	6.47	4.27873	1.2918e-09	5.32964e-08	Up	receptor protein kinase CRINKLY4 precursor putative expressed
Os01g0510200	14.35	7.82	8.77	149.47	268.48	181.09	10.3133	199.68	4.27511	4.26798e-58	5.50459e-55	Up	expressed protein
Os07g0218700	0.55	0.54	0.69	6.63	11.97	15.41	0.593333	11.3367	4.25601	5.5071e-38	3.63028e-35	Up	cytochrome P450 putative expressed
Os10g0379100	0.33	0.12	0.08	2.07	2.3	5.44	0.176667	3.27	4.21019	3.43702e-13	2.60091e-11	Up	transferase family protein putative expressed
Os12g0247900	0.09	0	0.09	0.73	1.02	1.56	0.06	1.10333	4.20076	2.67277e-06	4.92148e-05	Up	--
Os08g0155550	0	0	0.11	0.5	0.04	1.46	0.0366667	0.666667	4.18442	0.00409552	0.0241722	Up	--
Os04g0640200	0	0.02	0	0.11	0.12	0.13	0.00666667	0.12	4.16993	0.0011031	0.00824445	Up	expressed protein
Os12g0639400	0.03	0	0.04	0.37	0.43	0.43	0.0233333	0.41	4.13516	6.07821e-05	0.000719489	Up	ATPase AAA family domain containing protein expressed
Os01g0714800	0.26	0.11	0.07	0.49	2.46	4.71	0.146667	2.55333	4.12177	3.7467e-07	8.84185e-06	Up	WRKY26 expressed
Os04g0660900	0	0	0.03	0.19	0.12	0.2	0.01	0.17	4.08746	0.00358899	0.0216719	Up	proton-dependent oligopeptide transport putative expressed
Os05g0277000	0	0.21	0	0.75	0.77	1.89	0.07	1.13667	4.02131	0.000431211	0.00375666	Up	expansin precursor putative expressed
Os01g0947000	1.37	2.11	2.35	25.58	35.32	31.71	1.94333	30.87	3.9896	2.94509e-76	6.72024e-73	Up	glycosyl hydrolases family 17 putative expressed
Os06g0229800	0	0.04	0.04	0.47	0.36	0.44	0.0266667	0.423333	3.98868	2.14455e-07	5.39118e-06	Up	soluble starch synthase 2-3 chloroplast precursor putative expressed
Os04g0627900	1.98	0.66	0.56	5.61	27.52	17.07	1.06667	16.7333	3.97154	1.33393e-06	2.67003e-05	Up	expressed protein
Os02g0568700	0.1	0	0	0.13	0.62	0.6	0.0333333	0.45	3.75489	0.00383106	0.0228845	Up	transposon protein putative CACTA En FSpm sub-class expressed
Os05g0395400	4.26	2.49	3.41	42.8	53.65	38.67	3.38667	45.04	3.73327	7.53477e-58	9.31297e-55	Up	expressed protein
Os06g0486900	0.88	0.21	0.99	3.19	4.73	19.31	0.693333	9.07667	3.71054	0.000127914	0.0013675	Up	erythronate-4-phosphate dehydrogenase domain containing protein expressed
Os07g0605800	2.88	2.59	1.84	31.41	34.33	29.49	2.43667	31.7433	3.70347	8.00269e-96	2.63769e-92	Up	sulfotransferase domain containing protein expressed
Os03g0734500	0	0	0.26	0.47	0.43	2.44	0.0866667	1.11333	3.68326	0.00776562	0.0401183	Up	expressed protein
Os07g0550600	0.19	0.06	0	0.55	1.44	1.15	0.0833333	1.04667	3.65076	2.05179e-05	0.000283882	Up	transferase family protein putative expressed
Os12g0257600	0.97	0.17	0.35	3.59	3.4	10.99	0.496667	5.99333	3.59301	3.25744e-05	0.000420857	Up	retrotransposon protein putative unclassified expressed
MSTRG.19004	0.02	0	0.07	0.41	0.47	0.16	0.03	0.346667	3.53051	0.000173881	0.00176705	Up	--
Os09g0306232	0.09	0.03	0	0.37	0.2	0.8	0.04	0.456667	3.51307	0.00323456	0.0199231	Up	--
Os12g0639500	0.44	0.66	0.47	4.98	6.97	5.85	0.523333	5.93333	3.50304	2.44708e-33	1.25156e-30	Up	ATPase 2 putative expressed
Os06g0230000	1.09	0.74	0.47	7.63	8.6	9.41	0.766667	8.54667	3.47869	1.17307e-30	4.90112e-28	Up	expressed protein
Os02g0569400	1.23	0.37	1.35	9.75	8.24	14.23	0.983333	10.74	3.44917	7.8453e-18	9.9031e-16	Up	cytochrome P450 putative expressed
Os07g0677500	0.53	0.34	0.06	2.27	4.18	3.69	0.31	3.38	3.44668	1.0756e-09	4.51294e-08	Up	peroxidase precursor putative expressed
Os11g0451700	0.14	0	0.09	0.34	0.61	1.42	0.0766667	0.79	3.36518	0.000434309	0.00377589	Up	dehydrin putative expressed
Os02g0183900	0.35	0.26	0.39	3.25	3.49	3.52	0.333333	3.42	3.35896	2.3944e-49	2.15235e-46	Up	isoleucyl-tRNA synthetase cytoplasmic putative expressed
Os03g0830500	0.57	0	0.36	3.57	2.5	3.45	0.31	3.17333	3.35566	1.5688e-06	3.08192e-05	Up	uncharacterized Cys-rich domain containing protein putative expressed
MSTRG.23148	0.05	0.07	0	0.38	0.25	0.59	0.04	0.406667	3.34577	0.00395979	0.023502	Up	--
Os01g0106400	55.94	59.29	80.42	557.82	578.54	841.23	65.2167	659.197	3.3374	1.65483e-62	2.33757e-59	Up	isoflavone reductase putative expressed
Os03g0797500	7.54	3.54	5.98	50.96	54.88	62.05	5.68667	55.9633	3.29883	6.61201e-43	5.30105e-40	Up	indole-3-glycerol phosphate lyase chloroplast precursor putative expressed
Os05g0206100	0.31	0	0.4	1.17	3.46	2.34	0.236667	2.32333	3.29527	4.63461e-05	0.000571409	Up	expressed protein
Os09g0536800	0	0.03	0.05	0.35	0.2	0.23	0.0266667	0.26	3.2854	0.000915737	0.00705386	Up	--
Os11g0437600	0.17	0.42	0.89	1.96	6.49	5.81	0.493333	4.75333	3.2683	4.44791e-08	1.31811e-06	Up	plant-specific domain TIGR01615 family protein expressed
Os04g0404400	0	0.06	0.1	0.21	0.49	0.84	0.0533333	0.513333	3.26679	0.00223976	0.0148043	Up	desiccation-related protein PCC13-62 precursor putative expressed
Os12g0202700	0.05	0.09	0.43	1.05	1.79	2.63	0.19	1.82333	3.26251	2.16555e-05	0.000297127	Up	O-methyltransferase putative expressed
Os05g0228000	0.13	0.11	0	0.24	0.9	1.16	0.08	0.766667	3.26053	0.00065511	0.00532125	Up	phosphorylase domain containing protein putative expressed
Os08g0140300	1.21	0.82	0.98	5.67	5.25	17.4	1.00333	9.44	3.23399	1.41989e-13	1.12319e-11	Up	decarboxylase putative expressed
Os04g0655400	0.15	0.03	0	0.74	0.57	0.37	0.06	0.56	3.22239	0.00256455	0.0165236	Up	protein kinase domain containing protein expressed
Os01g0699600	0.4	0.17	0.33	1.04	1.79	5.5	0.3	2.77667	3.21032	9.08574e-07	1.91013e-05	Up	STE_MEKK_ste11_MAP3K.7 - STE kinases include homologs to sterile 7 sterile 11 and sterile 20 from yeast expressed
Os02g0184700	0.07	0	0.11	0.53	0.57	0.52	0.06	0.54	3.16993	9.81082e-05	0.00108512	Up	cytochrome P450 71D10 putative expressed
Os03g0195800	0.21	0.25	0.36	2.47	2.32	2.46	0.273333	2.41667	3.14429	3.51578e-27	1.12142e-24	Up	sulfate transporter putative expressed
Os03g0724600	1.39	0.86	1.13	10.53	12.47	6.5	1.12667	9.83333	3.12562	7.55242e-19	1.06178e-16	Up	expressed protein
Os04g0103900	0.08	0	0.11	0.44	0.51	0.69	0.0633333	0.546667	3.10962	0.000155138	0.00160237	Up	chalcone synthase putative expressed
MSTRG.19390	0.59	0	0.19	2.09	2.35	2.19	0.26	2.21	3.08746	0.000112303	0.00121894	Up	--
MSTRG.32349	0.06	0.05	0	0.08	0.39	0.46	0.0366667	0.31	3.07973	0.00280475	0.0177399	Up	PREDICTED: UDP-glycosyltransferase 89B2-like [Oryza sativa Japonica Group]
Os02g0129800	11.91	11.59	6.72	48.26	87.74	117.03	10.0733	84.3433	3.06573	2.24954e-22	4.63405e-20	Up	UP-9A putative expressed
Os01g0692050	0.39	0	0.16	1.17	2.07	1.3	0.183333	1.51333	3.04519	0.000440437	0.00381798	Up	--
Os01g0731600	0.13	0	0.17	1.09	0.54	0.84	0.1	0.823333	3.04148	0.000515859	0.00436713	Up	pathogen-related protein putative expressed
Os10g0509600	1.07	1.54	0.66	1.76	10.68	14.17	1.09	8.87	3.02461	3.33118e-05	0.000428145	Up	UP-9A putative expressed
MSTRG.28235	0	0.67	0.28	3.22	2.62	1.79	0.316667	2.54333	3.00568	0.000312683	0.00288954	Up	--
Os03g0236200	1.35	1.19	1.39	6.87	8.69	15.46	1.31	10.34	2.9806	2.36735e-22	4.84311e-20	Up	glutamate decarboxylase putative expressed
Os01g0263000	0.1	0	0.15	0.68	0.73	0.55	0.0833333	0.653333	2.97085	0.000812439	0.00636391	Up	peroxidase precursor putative expressed
Os06g0216300	2.24	1.37	2.12	17.34	12.74	14.63	1.91	14.9033	2.96399	2.22656e-38	1.57259e-35	Up	12-oxophytodienoate reductase putative expressed
Os12g0491800	1.63	0.87	2.45	10.87	9.51	18.24	1.65	12.8733	2.96385	9.22414e-17	1.04437e-14	Up	terpene synthase putative expressed
Os07g0188000	0.02	0.02	0	0.14	0.1	0.07	0.0133333	0.103333	2.9542	0.00735941	0.0384619	Up	argonaute putative expressed
Os01g0307686	3.46	2.3	3.19	20.11	22.53	26.66	2.98333	23.1	2.9529	5.09457e-44	4.19792e-41	Up	methyltransferase putative expressed
Os09g0551000	0.08	0.09	0.11	0.43	0.66	1.07	0.0933333	0.72	2.94753	3.05972e-07	7.42138e-06	Up	serine Fthreonine-protein kinase receptor precursor putative expressed
Os05g0506000	9.94	8.38	10.39	72.67	70.48	78.18	9.57	73.7767	2.94657	3.97028e-121	2.35549e-117	Up	tetratricopeptide repeat domain containing protein expressed
Os04g0633800	0.13	0.04	0	0.44	0.57	0.29	0.0566667	0.433333	2.9349	0.0011589	0.00859137	Up	serine Fthreonine-protein kinase receptor precursor putative expressed
Os10g0509401	11.33	14.64	11.02	31.87	65.12	182.16	12.33	93.05	2.91583	5.25767e-05	0.000635548	Up	UP-9A putative expressed
Os01g0606900	0.09	0.08	0.22	0.54	0.95	1.43	0.13	0.973333	2.90442	5.17525e-05	0.000628144	Up	heat shock protein DnaJ putative expressed
Os01g0124000	7.8	4.02	6.48	40.25	56.9	39.59	6.1	45.58	2.90152	4.25112e-30	1.6814e-27	Up	BBTI2 - Bowman-Birk type bran trypsin inhibitor precursor expressed
Os01g0253800	0.84	0.36	0.16	1.61	4.16	4.29	0.453333	3.35333	2.88695	3.00227e-05	0.000394242	Up	GCRP6 - Glycine and cysteine rich family protein precursor putative expressed
Os12g0150200	0.37	0.27	0.25	1.69	1.79	3.1	0.296667	2.19333	2.88621	2.32114e-12	1.53693e-10	Up	cytochrome P450 putative expressed
Os10g0506200	1.05	0.6	0.82	6.27	7.18	4.81	0.823333	6.08667	2.8861	6.42745e-30	2.47615e-27	Up	valyl-tRNA synthetase putative expressed
Os07g0217600	0.57	0.21	0.75	3.23	2.45	5.5	0.51	3.72667	2.86932	1.19774e-09	4.98312e-08	Up	cytochrome P450 putative expressed
Os01g0307624	0.13	0	0.05	0.39	0.4	0.52	0.06	0.436667	2.8635	0.00063627	0.00519667	Up	expressed protein
Os04g0179200	1.34	1.22	2.33	7.14	14.13	14.18	1.63	11.8167	2.85788	2.7318e-16	2.94677e-14	Up	sex determination protein tasselseed-2 putative expressed
Os12g0458100	4.52	0.72	2.32	11.9	16.85	26	2.52	18.25	2.8564	0.000160401	0.00164699	Up	transferase family protein putative expressed
Os09g0457900	0.05	0.15	0.2	0.22	0.61	2.06	0.133333	0.963333	2.853	0.00253871	0.0163856	Up	AP2 domain containing protein expressed
Os03g0437200	0.62	0.32	0.27	1.42	2.69	4.62	0.403333	2.91	2.85097	2.76207e-07	6.81081e-06	Up	ZOS3-12 - C2H2 zinc finger protein expressed
Os01g0155000	0.55	0.55	0.77	3.11	6.03	4.33	0.623333	4.49	2.84864	4.83075e-15	4.56367e-13	Up	gibberellin receptor GID1L2 putative expressed
Os04g0179100	0.32	0.46	1.12	2.95	3.65	7.07	0.633333	4.55667	2.84694	3.5949e-06	6.33625e-05	Up	sex determination protein tasselseed-2 putative expressed
Os04g0371100	0.03	0	0.07	0.2	0.2	0.31	0.0333333	0.236667	2.82782	0.00475507	0.0272096	Up	OsWAK47 - OsWAK receptor-like protein kinase expressed
Os04g0206500	2.38	0.95	1.31	9.31	11.18	12.04	1.54667	10.8433	2.80957	1.87574e-19	2.82447e-17	Up	UDP-glucoronosyl FUDP-glucosyl transferase putative expressed
Os07g0663900	0.14	0.07	0.03	0.32	0.64	0.72	0.08	0.56	2.80735	0.00336908	0.0206075	Up	sex determination protein tasselseed-2 putative expressed
Os09g0255400	2.94	1.46	2.07	13.37	15.12	16.66	2.15667	15.05	2.80289	1.35056e-28	4.65849e-26	Up	indole-3-glycerol phosphate synthase chloroplast precursor putative expressed
Os03g0693700	0	0.19	0.08	0.59	0.91	0.36	0.09	0.62	2.78427	0.0058818	0.0322689	Up	Cupin domain containing protein expressed
Os01g0825800	7.17	6.72	6.97	46.33	42.71	53.92	6.95333	47.6533	2.7768	9.73058e-97	3.6081e-93	Up	transmembrane amino acid transporter protein putative expressed
Os03g0338000	6.96	6.13	6.6	44.15	34.91	55.19	6.56333	44.75	2.76939	7.74019e-54	8.50389e-51	Up	aminotransferase putative expressed
Os09g0324400	0.23	0.65	0.16	1.69	3.16	2.2	0.346667	2.35	2.76104	2.53355e-07	6.26815e-06	Up	OsFBX314 - F-box domain containing protein expressed
Os04g0674800	0.02	0.14	0.05	0.14	0.27	1.01	0.07	0.473333	2.75743	0.00425008	0.0249011	Up	endoglucanase precursor putative expressed
Os10g0379854	0.17	0.16	0.13	0.36	0.84	1.91	0.153333	1.03667	2.75721	0.000274904	0.00259706	Up	--
Os04g0180400	0.73	0.48	1.48	3.98	6.19	7.95	0.896667	6.04	2.7519	5.45952e-11	2.88683e-09	Up	cytochrome P450 putative expressed
Os05g0282900	0.19	0.12	0.06	0.78	0.75	0.92	0.123333	0.816667	2.72718	9.66217e-07	2.01702e-05	Up	--
Os01g0298400	0.19	0	0.1	0.75	0.83	0.33	0.0966667	0.636667	2.71945	0.00480754	0.027441	Up	MYB family transcription factor putative expressed
MSTRG.27000	0.16	0	0.21	0.49	1.03	0.91	0.123333	0.81	2.71536	0.00382325	0.0228425	Up	PREDICTED: uncharacterized protein LOC107281389 isoform X6 [Oryza sativa Japonica Group]
Os10g0439800	0.71	0.51	2.08	4.64	7	9.97	1.1	7.20333	2.71116	3.13712e-08	9.57404e-07	Up	cytochrome P450 putative expressed
Os11g0641500	1.4	0.7	3.68	6.01	7.37	24.03	1.92667	12.47	2.69428	0.00280076	0.0177242	Up	laccase precursor protein putative expressed
Os03g0145600	0.33	0.23	0.42	1.62	2.42	2.27	0.326667	2.10333	2.68679	4.89562e-11	2.62611e-09	Up	WD domain G-beta repeat domain containing protein expressed
Os01g0155800	4.54	6.16	7.59	41.02	51.01	25.18	6.09667	39.07	2.67997	3.80786e-20	6.31042e-18	Up	glycine-rich cell wall structural protein precursor putative expressed
Os08g0508700	1.35	0.55	0.91	5.83	5.74	6.41	0.936667	5.99333	2.67775	4.20401e-20	6.92821e-18	Up	ethylene-insensitive 3 putative expressed
Os12g0227400	0.04	0.78	0.49	1.99	3.68	2.71	0.436667	2.79333	2.67738	9.442e-05	0.0010502	Up	NADP-dependent oxidoreductase putative expressed
Os03g0757600	2.3	3.04	2.67	18.75	17.02	15.36	2.67	17.0433	2.6743	8.29004e-58	9.83663e-55	Up	UDP-glucoronosyl and UDP-glucosyl transferase domain containing protein expressed
Os12g0258700	3.23	2	2.44	10.78	14.88	23.26	2.55667	16.3067	2.67313	6.88853e-20	1.10455e-17	Up	laccase precursor protein putative expressed
MSTRG.19520	0.13	0.4	0.61	2.88	3.32	1.06	0.38	2.42	2.67094	7.68699e-05	0.000882116	Up	--
Os10g0419400	3.3	1.75	3.71	17.49	17.18	21.06	2.92	18.5767	2.66945	1.83664e-22	3.86398e-20	Up	1 2-dihydroxy-3-keto-5-methylthiopentene dioxygenase protein putative expressed
Os04g0179700	0.53	0.16	0.76	1.24	3.15	4.75	0.483333	3.04667	2.65614	2.65306e-06	4.89736e-05	Up	ent-kaurene synthase chloroplast precursor putative expressed
Os01g0963000	5.02	3.15	7.12	28.87	32.81	33.47	5.09667	31.7167	2.63762	1.02426e-23	2.39242e-21	Up	peroxidase precursor putative expressed
Os08g0527800	0.05	0	0.12	0.37	0.35	0.33	0.0566667	0.35	2.62678	0.0021483	0.0143336	Up	ubiquitin carboxyl-terminal hydrolase domain containing protein expressed
Os01g0696701	0.19	0.08	0.1	0.45	0.76	1.07	0.123333	0.76	2.62344	0.00168434	0.0117122	Up	--
Os09g0341500	0.39	0.24	0.07	1.09	1.85	1.35	0.233333	1.43	2.61555	6.8921e-06	0.000110452	Up	expressed protein
Os03g0233900	1.56	1.89	3.38	10.17	21.47	10.09	2.27667	13.91	2.61113	6.87276e-11	3.57047e-09	Up	non-symbiotic hemoglobin 2 putative expressed
Os02g0121700	3.05	2.42	3.3	25.77	14.14	12.51	2.92333	17.4733	2.57947	5.34987e-20	8.7197e-18	Up	terpene synthase putative expressed
Os04g0206450	0.31	0.45	0.45	2.12	2.85	2.24	0.403333	2.40333	2.57499	7.15688e-13	5.1034e-11	Up	indole-3-acetate beta-glucosyltransferase putative expressed
Os01g0855200	11.1	9.74	12.22	56.32	75.41	65.24	11.02	65.6567	2.57482	4.80681e-65	7.92162e-62	Up	expressed protein
Os06g0697500	1.32	0.43	0.47	4.34	5.14	3.71	0.74	4.39667	2.57081	1.63019e-09	6.56147e-08	Up	AAA ATPase putative expressed
Os09g0341600	0.28	0.1	0.09	0.89	0.91	0.97	0.156667	0.923333	2.55915	1.04234e-05	0.000158726	Up	OsFBX319 - F-box domain containing protein expressed
Os08g0137800	1.17	0.48	0.91	2.13	4.32	8.56	0.853333	5.00333	2.55171	3.86523e-06	6.72087e-05	Up	plastocyanin-like domain containing protein putative expressed
Os06g0315000	0.87	0.68	1.8	4.93	6.52	7.98	1.11667	6.47667	2.53605	2.32123e-10	1.11781e-08	Up	SAM dependent carboxyl methyltransferase putative expressed
Os08g0148267	1.91	2.6	1.56	11.45	11.6	12.15	2.02333	11.7333	2.53581	1.12937e-32	5.40349e-30	Up	oxidoreductase family NAD-binding Rossmann fold containing protein expressed
Os01g0670100	0.15	0.3	0.32	1.26	1.14	2.06	0.256667	1.48667	2.53411	1.86424e-09	7.38327e-08	Up	S-locus-like receptor protein kinase putative expressed
Os09g0498500	11.84	7.86	11.1	24.93	71.87	79.35	10.2667	58.7167	2.5158	1.48927e-06	2.94714e-05	Up	FAD dependent oxidoreductase domain containing protein expressed
Os08g0169100	0.02	0.04	0.01	0.08	0.18	0.14	0.0233333	0.133333	2.51457	0.00175408	0.0121289	Up	--
Os06g0586000	4.65	2.25	5.7	23.12	24.56	24.1	4.2	23.9267	2.51016	4.59377e-16	4.81518e-14	Up	expressed protein
Os01g0609300	12.31	9.8	12.43	48.08	66.86	81.67	11.5133	65.5367	2.509	2.51261e-36	1.49068e-33	Up	pleiotropic drug resistance protein putative expressed
Os01g0373700	0.89	0.45	0.93	4.09	3.76	5	0.756667	4.28333	2.501	1.34057e-09	5.51549e-08	Up	--
Os08g0374701	0.38	0.26	0.27	1.55	1.05	2.54	0.303333	1.71333	2.49783	0.000138187	0.00145568	Up	receptor protein kinase CRINKLY4 precursor putative expressed
Os01g0609501	2.77	2.25	1.99	4.67	14.89	19.95	2.33667	13.17	2.49473	6.64057e-08	1.88143e-06	Up	--
Os12g0277900	0.18	0.28	0	0.82	1.17	0.6	0.153333	0.863333	2.49325	0.00343915	0.0209226	Up	expressed protein
Os02g0570400	2.31	1.51	3.17	11.41	13.44	14.45	2.33	13.1	2.49116	6.47534e-23	1.41239e-20	Up	terpene synthase putative expressed
Os07g0587300	0.91	0.49	0.5	1.04	3.34	6.17	0.633333	3.51667	2.47317	0.000222166	0.00217073	Up	expressed protein
Os04g0345400	0.26	0.19	0.4	1.8	1.67	1.23	0.283333	1.56667	2.46713	2.03998e-10	9.90411e-09	Up	terpene synthase putative expressed
Os06g0592500	12.91	25.34	13.83	41.81	73.84	172.06	17.36	95.9033	2.46581	0.000264974	0.0025212	Up	endothelial differentiation-related factor 1 putative expressed
Os04g0677300	1.24	0.75	0.67	1.58	5.19	7.84	0.886667	4.87	2.45746	6.68036e-06	0.000107699	Up	harpin-induced protein 1 domain containing protein expressed
Os11g0181200	0	0.88	0.4	1.74	1.73	3.44	0.426667	2.30333	2.43254	0.00740541	0.038675	Up	expressed protein
Os08g0112300	2.39	1.11	2.04	9.76	10.08	9.98	1.84667	9.94	2.42832	8.0184e-20	1.25188e-17	Up	transferase family protein putative expressed
Os05g0276500	0.38	0.73	0.1	1.33	1.91	3.25	0.403333	2.16333	2.42321	0.000167701	0.00171128	Up	expansin precursor putative expressed
Os12g0443000	0.11	0.14	0.26	0.58	0.99	1.14	0.17	0.903333	2.40972	3.21513e-05	0.000416479	Up	cytochrome P450 putative expressed
Os06g0649000	1.45	0.57	0.99	2.93	5.48	7.58	1.00333	5.33	2.40933	2.97334e-08	9.1117e-07	Up	WRKY28 expressed
Os04g0597600	0.28	0.19	0.1	0.54	0.66	1.81	0.19	1.00333	2.40073	5.65891e-05	0.000676333	Up	peptide transporter PTR2 putative expressed
Os04g0415800	1.12	0.9	0.41	3.2	5.74	3.79	0.81	4.24333	2.3892	4.03714e-06	6.96564e-05	Up	LTPL102 - Protease inhibitor Fseed storage FLTP family protein precursor expressed
Os09g0324300	0.05	0.13	0.16	0.42	0.99	0.37	0.113333	0.593333	2.38827	0.00162233	0.0113636	Up	OsFBX313 - F-box domain containing protein expressed
Os01g0773800	0.54	0.14	0.56	2.01	1.3	3.18	0.413333	2.16333	2.38788	8.76007e-05	0.000988432	Up	helix-loop-helix DNA-binding domain containing protein expressed
Os02g0102300	8.59	11.59	12.34	56.09	43.9	69.45	10.84	56.48	2.38138	5.57033e-29	1.99082e-26	Up	rhodanese-like domain containing protein putative expressed
Os07g0645300	0.54	0.31	0.24	0.53	1.79	3.35	0.363333	1.89	2.37902	0.00101761	0.00770451	Up	expressed protein
Os02g0559800	0.39	0.33	0.74	1.29	2.24	4.04	0.486667	2.52333	2.37432	1.03766e-05	0.00015824	Up	RING-H2 finger protein ATL3F putative expressed
Os05g0580000	79.71	66.21	83.84	381.91	415.1	394.16	76.5867	397.057	2.37418	1.32279e-86	3.26993e-83	Up	glucose-1-phosphate adenylyltransferase large subunit chloroplast precursor putative expressed
Os06g0249350	0.65	0.54	0.18	0.65	3.05	3.38	0.456667	2.36	2.36957	0.00193967	0.0131697	Up	expressed protein
MSTRG.1338	0.44	0.08	0.05	0.86	1.37	0.7	0.19	0.976667	2.36187	0.00230346	0.015144	Up	--
Os03g0180800	0.85	0.59	0.5	1.86	2.81	5.29	0.646667	3.32	2.36009	1.2643e-06	2.54612e-05	Up	ZIM domain containing protein putative expressed
Os05g0506800	0.04	0.13	0.09	0.4	0.33	0.6	0.0866667	0.443333	2.35484	0.00229357	0.0150824	Up	GDSL-like lipase Facylhydrolase putative expressed
Os12g0639200	0.29	0.13	0.23	0.75	1.29	1.28	0.216667	1.10667	2.35267	1.06436e-06	2.18803e-05	Up	ATPase 3 putative expressed
MSTRG.22720	0.17	0.07	0.34	0.81	1.02	1.11	0.193333	0.98	2.34169	0.000876353	0.00679282	Up	--
Os11g0594000	0.31	0.38	0.51	1.38	2.36	2.29	0.4	2.01	2.32912	1.57338e-09	6.36736e-08	Up	transporter family protein putative expressed
Os05g0588900	2.69	2.18	2.92	15.08	14.42	9.63	2.59667	13.0433	2.32858	7.66606e-22	1.47666e-19	Up	mitochondrial chaperone BCS1 putative expressed
Os02g0650900	0.99	0.38	0.13	1.78	2.49	3.26	0.5	2.51	2.32769	0.000117582	0.00127066	Up	glutamate dehydrogenase protein putative expressed
Os01g0268600	0.97	1.45	1.2	1.31	10.11	6.73	1.20667	6.05	2.32591	0.0029324	0.018406	Up	glycosyl hydrolase family 31 putative expressed
Os07g0417200	0.45	0.18	0.91	1.46	3.49	2.76	0.513333	2.57	2.3238	6.54519e-05	0.000764095	Up	fatty acid desaturase putative expressed
MSTRG.28194	0.66	0.52	0.85	1.93	3.28	4.95	0.676667	3.38667	2.32335	1.44152e-08	4.73548e-07	Up	PREDICTED: transcription factor JUNGBRUNNEN 1-like [Oryza sativa Japonica Group]
Os01g0743500	0.14	0.2	0.09	0.45	0.8	0.9	0.143333	0.716667	2.32193	3.11978e-05	0.000407263	Up	NADP-dependent malic enzyme putative expressed
Os11g0591800	0.14	0.8	1.23	2.25	3.87	4.72	0.723333	3.61333	2.3206	0.000360248	0.00324221	Up	WIP2 - Wound-induced protein precursor expressed
Os12g0621500	0.06	0.06	0.04	0.27	0.36	0.16	0.0533333	0.263333	2.30378	0.000429624	0.00374504	Up	AGC_AGC_other_GWLd.1 - ACG kinases include homologs to PKA PKG and PKC expressed
Os02g0561800	0.56	0.66	1.21	2.08	3.41	6.49	0.81	3.99333	2.3016	2.99297e-06	5.43018e-05	Up	RING-H2 finger protein ATL3F putative
Os03g0283100	55.21	51.27	56.17	256.47	264.61	275.62	54.2167	265.567	2.29227	9.62939e-145	1.42823e-140	Up	IN2-1 protein putative expressed
Os11g0635300	0.14	0.21	0.07	1.03	0.79	0.23	0.14	0.683333	2.28716	0.00169426	0.0117757	Up	cytochrome P450 putative expressed
Os07g0646400	0.03	0.17	0.04	0.52	0.33	0.32	0.08	0.39	2.2854	0.0025382	0.0163856	Up	expressed protein
Os10g0133166	0.1	0.17	0.05	0.61	0.28	0.67	0.106667	0.52	2.2854	0.00233241	0.015314	Up	expressed protein
Os07g0584283	0.37	0.08	0.14	0.43	1.1	1.34	0.196667	0.956667	2.28226	0.00117025	0.00865169	Up	--
MSTRG.17585	0.58	0.22	0.28	1.21	1.99	2.05	0.36	1.75	2.28129	0.000405398	0.00358015	Up	--
Os04g0523500	0.15	0.1	0.1	0.29	0.81	0.6	0.116667	0.566667	2.28011	0.000902551	0.00696858	Up	cytokinin dehydrogenase precursor putative expressed
MSTRG.14414	0.19	0	0.18	0.52	0.64	0.63	0.123333	0.596667	2.27436	0.01003	0.0491589	Up	PREDICTED: calmodulin-like protein 5 [Oryza sativa Japonica Group]
Os03g0618300	27.14	26.45	27.1	94.89	125.97	166.01	26.8967	128.957	2.26139	2.94152e-32	1.36339e-29	Up	gibberellin 20 oxidase 2 putative expressed
MSTRG.8911	0.3	0.28	0.48	1.84	1.91	1.33	0.353333	1.69333	2.26076	5.23407e-05	0.000632953	Up	--
Os04g0399800	0.05	0.19	0.21	0.95	0.69	0.51	0.15	0.716667	2.25634	0.0027506	0.0174682	Up	AP2 domain containing protein expressed
Os04g0185600	0.42	0.63	0.08	2.59	1.08	1.71	0.376667	1.79333	2.25128	0.000343616	0.00312957	Up	inorganic phosphate transporter putative expressed
Os05g0575000	0.33	0.59	0.35	0.89	2.8	2.33	0.423333	2.00667	2.24493	0.000814159	0.00637067	Up	expressed protein
Os02g0560600	0.14	0.13	0.26	0.44	0.76	1.31	0.176667	0.836667	2.24362	0.00107306	0.0080545	Up	RING-H2 finger protein ATL3F putative
Os05g0524500	0.04	0.24	0.02	0.39	0.33	0.7	0.1	0.473333	2.24286	0.00626608	0.0339317	Up	receptor-like protein kinase putative expressed
Os02g0560200	0.14	0.15	0.28	0.46	0.79	1.44	0.19	0.896667	2.23857	0.00104364	0.00786947	Up	RING-H2 type E3 ubiquitin ligase, Root development, Maintenance of cell viability after the initiation of root primordial formation, Defense response (Os02t0560200-01)
Os01g0136050	0.53	0.47	0.55	3	1.47	2.83	0.516667	2.43333	2.23563	5.71e-05	0.000682164	Up	Similar to 16.9 kDa heat shock protein. (Os01t0136050-00)
Os11g0303600	0.12	0.41	0.15	1.22	0.87	1.11	0.226667	1.06667	2.23447	0.000154295	0.00159644	Up	O-methyltransferase putative expressed
Os05g0399800	0.07	0.17	0.1	0.72	0.44	0.44	0.113333	0.533333	2.23447	0.00372685	0.0223611	Up	inactive receptor kinase At1g27190 precursor putative expressed
Os05g0404700	0.35	0.12	0.17	0.65	1.07	1.29	0.213333	1.00333	2.23362	0.00153903	0.0108622	Up	methyl-binding domain protein MBD putative expressed
Os12g0635400	1.69	0.75	0.87	1.49	2.29	11.75	1.10333	5.17667	2.23015	0.0018476	0.0126693	Up	VQ domain containing protein.
Os01g0196300	0.15	0.2	0.23	0.35	1.1	1.25	0.193333	0.9	2.21883	0.000398768	0.00353317	Up	helix-loop-helix DNA-binding domain containing protein expressed
MSTRG.31753	0.41	0.45	0.38	1.49	2.57	1.68	0.413333	1.91333	2.21071	5.0935e-05	0.000619744	Up	--
Os03g0245800	0.36	0.13	0.27	1.37	1.18	0.96	0.253333	1.17	2.2074	0.000133065	0.00141175	Up	hsp20 Falpha crystallin family protein putative expressed
Os02g0193300	0.28	0.21	0.22	0.52	0.71	2.04	0.236667	1.09	2.2034	0.00510325	0.02878	Up	expressed protein
Os01g0850800	0.14	0.12	0.11	0.58	0.55	0.56	0.123333	0.563333	2.19143	0.000126251	0.00135252	Up	laccase precursor protein putative expressed
Os04g0556400	1.77	0.74	1.28	5.02	5.76	6.36	1.26333	5.71333	2.1771	2.74763e-13	2.10609e-11	Up	glucosyltransferase putative expressed
Os07g0416900	0.29	0.26	0.46	1.04	2.11	1.37	0.336667	1.50667	2.16197	1.15648e-05	0.000173944	Up	fatty acid desaturase putative expressed
Os01g0692100	4.51	3.77	4.61	21.9	21.13	14.35	4.29667	19.1267	2.1543	2.40481e-21	4.48657e-19	Up	glutathione S-transferase putative expressed
Os06g0591400	38.44	22.95	36.94	176.65	170.81	88.08	32.7767	145.18	2.1471	1.29233e-14	1.16522e-12	Up	expressed protein
Os10g0411600	0.03	0.08	0.08	0.25	0.32	0.27	0.0633333	0.28	2.14439	0.00955082	0.0473613	Up	--
Os01g0959750	14.7	11.06	14.93	60.55	59.15	60.17	13.5633	59.9567	2.14421	2.82597e-41	2.14948e-38	Up	--
Os02g0626532	0.77	0.46	1.11	2.78	3.15	4.28	0.78	3.40333	2.1254	9.36037e-10	3.961e-08	Up	--
Os02g0570700	4.78	2.47	5.93	14.45	18.95	24.07	4.39333	19.1567	2.12446	6.48516e-12	4.08441e-10	Up	cytochrome P450 putative expressed
Os09g0499400	0.62	0.41	0.3	2.12	2.15	1.52	0.443333	1.93	2.12214	8.81226e-09	3.00468e-07	Up	gp176 putative expressed
Os02g0467600	0.71	0.44	0.47	1.48	2.01	3.55	0.54	2.34667	2.11958	4.72683e-07	1.07888e-05	Up	cytochrome P450 putative expressed
Os04g0203600	0.06	0.23	0.14	0.54	0.92	0.4	0.143333	0.62	2.11289	0.00315287	0.0195216	Up	Similar to cDNA clone:002-100-D12, full insert sequence. (Os04t0203600-00)
Os11g0160400	1.1	0.87	0.78	0.9	5.42	5.55	0.916667	3.95667	2.10982	0.000336658	0.00307375	Up	basic proline-rich protein precursor putative expressed
Os12g0555200	17.81	6.88	31	38.98	98.3	101.08	18.5633	79.4533	2.09765	0.00361014	0.0217621	Up	pathogenesis-related Bet v I family protein putative expressed
Os02g0773732	0.03	0.18	0.04	0.44	0.43	0.2	0.0833333	0.356667	2.09761	0.00765155	0.0396187	Up	expressed protein
Os09g0409100	5.84	6.57	8.09	9.13	16.66	61.74	6.83333	29.1767	2.09415	0.00909053	0.0454664	Up	expressed protein
Os01g0561600	0.43	0.22	0.77	1.03	1.45	3.58	0.473333	2.02	2.09343	0.000394183	0.00349777	Up	cytochrome P450 putative expressed
MSTRG.11862	0.31	0.27	0.37	0.91	1.66	1.47	0.316667	1.34667	2.08836	0.00131086	0.00950507	Up	--
Os04g0506800	0.56	0.47	0.28	0.94	2.33	2.3	0.436667	1.85667	2.08811	3.77626e-05	0.000478509	Up	sialyltransferase family domain containing protein expressed
Os03g0180900	11.71	7.39	10.23	49.16	32.45	42.93	9.77667	41.5133	2.08616	1.66068e-21	3.11787e-19	Up	ZIM domain containing protein putative expressed
Os11g0649400	0.22	0.54	0.39	1.46	1.84	1.58	0.383333	1.62667	2.08525	5.72283e-05	0.000683147	Up	integral membrane protein putative expressed
Os08g0468901	0.17	0.09	0.08	0.46	0.42	0.56	0.113333	0.48	2.08246	0.00314112	0.0194649	Up	--
Os05g0370700	0.19	0.36	0.38	0.97	1.42	1.54	0.31	1.31	2.07923	6.11374e-05	0.000722496	Up	esterase putative expressed
Os10g0111400	0.07	0.06	0.1	0.36	0.16	0.45	0.0766667	0.323333	2.07635	0.00465826	0.0268003	Up	OsWAK95 - OsWAK receptor-like protein kinase expressed
Os03g0201500	0.48	0.94	0.79	1.41	2.65	5.2	0.736667	3.08667	2.06697	1.15721e-05	0.000173944	Up	glycosyl hydrolase family 10 protein putative expressed
Os04g0178300	9.82	3.93	11.94	24.76	37.58	45.2	8.56333	35.8467	2.06559	8.93069e-05	0.00100348	Up	ent-kaurene synthase chloroplast precursor putative expressed
Os02g0131800	0.15	0.68	0.28	0.97	1.88	1.78	0.37	1.54333	2.06045	0.000217427	0.00213192	Up	metal transporter Nramp6 putative expressed
Os07g0582450	1.98	1.39	2.23	7.83	7.66	7.78	1.86667	7.75667	2.05497	2.6342e-20	4.46519e-18	Up	--
Os01g0237750	1.63	1.23	6.86	9.24	14.37	16.78	3.24	13.4633	2.05497	0.000615019	0.00506073	Up	isoflavone reductase homolog IRL putative expressed
Os04g0401700	12.28	9.38	16.22	45.74	57.31	54.11	12.6267	52.3867	2.05273	5.21707e-24	1.26852e-21	Up	potassium transporter putative expressed
Os09g0551400	0.17	0.15	0.17	0.39	0.48	1.15	0.163333	0.673333	2.0435	0.000412122	0.00362121	Up	serine Fthreonine-protein kinase receptor precursor putative expressed
Os09g0425300	0.18	0.59	0.16	1.94	0.99	0.9	0.31	1.27667	2.04204	0.00322129	0.0198662	Up	TsetseEP precursor putative expressed
Os06g0313440	1.34	0.86	1.59	4.46	4.96	6.16	1.26333	5.19333	2.03943	4.24833e-08	1.26406e-06	Up	SAM dependent carboxyl methyltransferase putative expressed
Os07g0174900	0.42	0.4	0.27	0.55	1.84	2.06	0.363333	1.48333	2.02948	0.00260949	0.016726	Up	LTPL76 - Protease inhibitor Fseed storage FLTP family protein precursor expressed
Os11g0210201	5.45	5.08	7.64	21.08	26.77	26.04	6.05667	24.63	2.02382	5.58705e-19	7.968e-17	Up	expressed protein
Os02g0269600	4.55	1.74	3.41	9.19	11.01	19.24	3.23333	13.1467	2.0236	2.38729e-08	7.4859e-07	Up	OsSub13 - Putative Subtilisin homologue expressed
Os02g0571900	5.45	3.22	8.39	20.14	19.75	29.34	5.68667	23.0767	2.02078	1.65855e-10	8.11871e-09	Up	cytochrome P450 putative expressed
Os02g0812700	0.16	0.09	0.1	0.44	0.64	0.34	0.116667	0.473333	2.02046	0.00990422	0.0486906	Up	OsFBX67 - F-box domain containing protein expressed
Os04g0373400	9.59	4.67	6.96	23.39	35.98	26.72	7.07333	28.6967	2.02042	1.4791e-14	1.32156e-12	Up	MATE efflux family protein putative expressed
MSTRG.6443	1.05	0.79	0.99	4.62	3.66	3.15	0.943333	3.81	2.01395	9.04537e-10	3.83865e-08	Up	PREDICTED: probable glutathione S-transferase GSTU6 [Oryza sativa Japonica Group]
Os08g0137900	0.58	0.63	0.34	0.72	1.2	4.34	0.516667	2.08667	2.01389	0.00564884	0.0312334	Up	plastocyanin-like domain containing protein putative expressed
Os03g0797300	4.13	4.56	2.94	19.56	13.36	13.98	3.87667	15.6333	2.01174	7.83387e-15	7.19455e-13	Up	indole-3-glycerol phosphate lyase chloroplast precursor putative expressed
Os01g0237500	1.37	1.24	4.59	7.42	10.53	11.08	2.4	9.67667	2.01148	6.23051e-05	0.000734003	Up	isoflavone reductase homolog IRL putative expressed
Os02g0513100	4.45	5.81	7.06	27.8	24.89	17.11	5.77333	23.2667	2.01079	3.01932e-17	3.58261e-15	Up	nodulin MtN3 family protein putative expressed
Os11g0514500	2.54	1.74	7.26	11.79	20.09	14.55	3.84667	15.4767	2.00841	1.32506e-05	0.000194876	Up	BRASSINOSTEROID INSENSITIVE 1-associated receptor kinase 1 precursor putative expressed
Os01g0695800	7.66	7.18	6.94	26.28	33.05	28.07	7.26	29.1333	2.00463	3.91193e-38	2.63735e-35	Up	ABC transporter ATP-binding protein putative expressed
Os01g0940800	8.97	6.29	12.16	49.11	39.48	21.33	9.14	36.64	2.00315	3.15374e-10	1.47559e-08	Up	glycosyl hydrolases family 17 putative expressed
Os03g0561400	0.15	0.07	0.05	0.46	0.2	0.42	0.09	0.36	2	0.00342312	0.020856	Up	retrotransposon protein putative Ty3-gypsy subclass expressed
MSTRG.33536	0.77	0.45	0.97	4.1	2.19	2.46	0.73	2.91667	1.99835	7.31097e-07	1.58417e-05	Up	PREDICTED: annexin D2-like [Oryza sativa Japonica Group]
Os01g0627600	0.4	0.05	0.2	0.61	0.81	1.16	0.216667	0.86	1.98886	0.00351415	0.0212916	Up	cytochrome P450 72A1 putative expressed
Os10g0571600	4.69	3.78	4.75	21.63	16.26	14.35	4.40667	17.4133	1.98243	4.49068e-20	7.35976e-18	Up	no apical meristem protein putative expressed
Os10g0400100	16.65	17.73	17.46	69.15	68.09	66.98	17.28	68.0733	1.97799	1.51374e-124	1.12259e-120	Up	methionyl-tRNA synthetase putative expressed
Os12g0111800	0.41	0.08	0.33	0.6	1.89	0.74	0.273333	1.07667	1.97784	0.00856985	0.0433742	Up	peroxidase precursor putative expressed
Os07g0543100	6.06	7.27	7.43	25.18	28.07	28.51	6.92	27.2533	1.97759	4.11821e-50	3.81759e-47	Up	beta-amylase putative expressed
Os03g0313800	0.89	2.79	1.61	2.31	2.86	15.62	1.76333	6.93	1.97455	0.00541279	0.0301862	Up	expressed protein
Os03g0363100	0.39	0.06	0.26	1.06	1.01	0.72	0.236667	0.93	1.97437	0.000610038	0.00502532	Up	expressed protein
Os12g0245100	0.28	0.26	0.18	0.78	1.06	0.98	0.24	0.94	1.96963	5.39948e-06	8.97815e-05	Up	expressed protein
Os02g0282900	2.73	2.47	2.97	10.25	9.73	12.01	2.72333	10.6633	1.96921	5.24425e-36	3.0503e-33	Up	ATP-binding cassette sub-family E member 1 putative expressed
Os05g0241100	0.68	0.63	0.62	1.94	2.7	2.89	0.643333	2.51	1.96405	9.31557e-16	9.4313e-14	Up	leucyl-tRNA synthetase cytoplasmic putative expressed
Os01g0609200	0.17	0.31	0.22	0.54	1.5	0.69	0.233333	0.91	1.96347	3.13731e-05	0.000408424	Up	pleiotropic drug resistance protein putative expressed
Os03g0231650	0.38	0.25	0.19	1.24	0.81	1.14	0.273333	1.06333	1.95986	0.000217353	0.00213192	Up	squalene monooxygenase putative expressed
Os02g0772000	0.11	0.29	0.23	0.71	1.05	0.69	0.21	0.816667	1.95936	1.41031e-05	0.000205426	Up	transcription elongation factor SPT5 homolog 1 putative expressed
Os03g0153900	6.74	4.86	6.82	25.44	24.5	21.43	6.14	23.79	1.95404	4.22215e-29	1.52739e-26	Up	expressed protein
Os02g0580966	0.31	0.12	0.19	0.82	0.89	0.68	0.206667	0.796667	1.94667	0.000297221	0.00277344	Up	--
Os07g0564500	3.42	1.54	2.6	5.75	10.38	12.94	2.52	9.69	1.94307	3.29661e-08	1.00195e-06	Up	NADH-ubiquinone oxidoreductase mitochondrial precursor putative expressed
Os12g0568500	0.46	0.95	0.86	0.96	5.75	2	0.756667	2.90333	1.93998	0.00840729	0.0426971	Up	metallothionein putative expressed
Os07g0410700	0.4	0.24	0.15	0.36	1	1.67	0.263333	1.01	1.93939	0.00480409	0.0274304	Up	AP2 domain containing protein expressed
Os05g0515900	1.1	0.74	0.61	4.13	2.6	2.62	0.816667	3.11667	1.93218	2.03766e-07	5.14865e-06	Up	heat- and acid-stable phosphoprotein putative expressed
Os08g0508000	2.58	0.78	1.32	4.17	5.81	7.87	1.56	5.95	1.93134	3.83966e-06	6.68818e-05	Up	cytochrome P450 putative expressed
Os01g0627701	0.1	0.27	0.06	0.31	0.66	0.67	0.143333	0.546667	1.93129	0.00493699	0.0280442	Up	--
Os02g0205500	2.78	2.78	3.33	10.62	9.82	13.43	2.96333	11.29	1.92975	1.45837e-24	3.82841e-22	Up	3-ketoacyl-CoA synthase putative expressed
MSTRG.7050	0.99	1.03	1.2	4.71	4.23	3.32	1.07333	4.08667	1.92883	4.49583e-05	0.000556613	Up	GDA1/CD39 family protein [Oryza sativa Japonica Group]
Os12g0578800	0.38	0.52	0.26	1.1	1.33	1.98	0.386667	1.47	1.92665	3.85817e-06	6.71254e-05	Up	ZOS12-07 - C2H2 zinc finger protein expressed
Os01g0160800	3.9	2.77	2.97	7.64	12.34	16.53	3.21333	12.17	1.92119	1.84315e-10	8.99263e-09	Up	ribosome inactivating protein putative expressed
Os07g0526600	0.69	0.36	1.08	2.42	2.34	3.3	0.71	2.68667	1.91993	4.32132e-06	7.38117e-05	Up	CXE carboxylesterase putative expressed
Os03g0594100	0.77	0.49	1.05	2.42	3.24	3.08	0.77	2.91333	1.91974	4.06169e-09	1.49301e-07	Up	cytochrome P450 putative expressed
Os01g0136100	4.75	3.58	4.36	19.17	12.88	15.79	4.23	15.9467	1.91453	5.25633e-17	6.11466e-15	Up	hsp20 Falpha crystallin family protein putative expressed
Os01g0248701	3.22	3.57	4.12	14.76	12.47	13.89	3.63667	13.7067	1.91419	1.17237e-27	3.78012e-25	Up	polyprenyl synthetase putative expressed
Os01g0389700	1.41	0.94	1.19	3.2	3.11	7	1.18	4.43667	1.91069	7.57924e-06	0.000119974	Up	expressed protein
Os12g0221400	3.25	3.57	6.38	14.47	17.01	18.12	4.4	16.5333	1.9098	3.7725e-11	2.05335e-09	Up	expressed protein
Os08g0391000	0.72	0.1	0.7	1.39	2.21	2.06	0.506667	1.88667	1.89673	0.00311361	0.0193186	Up	--
Os01g0581800	0.36	0.37	0.35	1.17	1.38	1.46	0.36	1.33667	1.89257	2.18959e-07	5.49044e-06	Up	expressed protein
Os12g0559200	108.5	103.85	186.16	323.78	491.2	662.86	132.837	492.613	1.8908	7.10672e-06	0.000113402	Up	lipoxygenase 2.1 chloroplast precursor putative expressed
Os03g0103100	9.71	8.6	13.81	13.22	31.48	73.9	10.7067	39.5333	1.88456	0.00716873	0.0377513	Up	LTPL114 - Protease inhibitor Fseed storage FLTP family protein precursor expressed
Os02g0270200	0.26	0.23	0.31	0.89	0.94	1.12	0.266667	0.983333	1.88264	3.41071e-07	8.14615e-06	Up	OsSub14 - Putative Subtilisin homologue expressed
Os05g0119000	6.85	3.38	5.8	22.15	18.49	18.39	5.34333	19.6767	1.88067	8.78598e-14	7.06307e-12	Up	ABC transporter membrane-spanning Fpermease subunit putative expressed
Os01g0793300	5.54	6.3	6.67	18.35	21.66	27.99	6.17	22.6667	1.87723	1.94538e-25	5.60269e-23	Up	polyphenol oxidase putative expressed
Os07g0283050	1.93	1.46	0.82	3.73	3.45	8.14	1.40333	5.10667	1.86352	4.42477e-06	7.53049e-05	Up	lectin-like receptor kinase putative expressed
Os01g0696600	2.28	3.38	2.2	10.71	9.17	8.6	2.62	9.49333	1.85735	3.0999e-11	1.72201e-09	Up	MDR-like ABC transporter putative expressed
Os01g0566500	1.34	2.03	1.83	4.21	7.3	7.24	1.73333	6.25	1.85031	1.28397e-10	6.42288e-09	Up	beta beta-carotene 9 10-dioxygenase putative expressed
Os04g0288100	3.31	2.36	5.45	10.56	13.52	15.96	3.70667	13.3467	1.84829	2.70878e-08	8.34404e-07	Up	retrotransposon protein putative unclassified expressed
Os03g0790500	7.18	4.1	7.1	16.81	27.63	21.6	6.12667	22.0133	1.8452	3.76097e-12	2.42007e-10	Up	gibberellin receptor GID1L2 putative expressed
Os06g0549600	0.37	0.3	0.14	0.38	0.85	1.67	0.27	0.966667	1.84006	0.0053132	0.0297491	Up	reticuline oxidase-like protein precursor putative expressed
Os02g0686100	0.35	0.18	0.36	0.69	0.68	1.81	0.296667	1.06	1.83715	0.00577145	0.0317515	Up	RING-H2 finger protein putative expressed
Os01g0768333	1.34	0.52	1.92	2.77	5.29	5.42	1.26	4.49333	1.83436	0.0016825	0.011706	Up	OsSAUR2 - Auxin-responsive SAUR gene family member expressed
Os12g0471100	0.6	0.47	0.85	1.25	1.77	3.81	0.64	2.27667	1.83078	0.000140231	0.00147459	Up	ATPase 2 putative expressed
Os08g0514033	0.58	0.18	0.36	0.76	1.45	1.77	0.373333	1.32667	1.82927	0.00401477	0.0237855	Up	--
Os02g0611250	0.24	0.2	0.82	1.24	1.17	2.06	0.42	1.49	1.82685	0.0021111	0.0141242	Up	--
Os12g0559934	31.49	30.7	46.02	113.86	142.79	126.94	36.07	127.863	1.82573	9.86362e-22	1.88771e-19	Up	lipozygenase protein putative expressed
Os06g0474800	0.41	0.21	0.41	1.54	0.82	1.29	0.343333	1.21667	1.82525	0.000131958	0.00140352	Up	expressed protein
Os11g0450400	0.71	0.93	0.67	1.54	3.2	3.43	0.77	2.72333	1.82244	1.71987e-05	0.000245279	Up	sulfotransferase domain containing protein expressed
Os12g0223000	0.11	0.17	0.15	0.26	0.96	0.3	0.143333	0.506667	1.82166	0.00888949	0.0446567	Up	--
Os06g0586150	0.24	0.13	0.25	0.78	0.61	0.8	0.206667	0.73	1.82059	4.37491e-06	7.46276e-05	Up	receptor-like protein kinase precursor putative expressed
Os01g0257300	0.56	0.33	0.28	1.95	1.47	0.7	0.39	1.37333	1.81614	0.00484437	0.0276246	Up	flowering promoting factor-like 1 putative expressed
Os08g0538100	0.28	0.15	0.25	0.52	1.21	0.65	0.226667	0.793333	1.80735	0.00366099	0.0220239	Up	--
Os03g0296200	0.58	0.57	0.49	1.25	1.96	2.51	0.546667	1.90667	1.80232	0.000123236	0.001325	Up	RPGR putative expressed
Os12g0424700	0.24	0.33	0.23	0.34	1.02	1.43	0.266667	0.93	1.80219	0.00881702	0.0443452	Up	cyclin-dependent kinase G-2 putative expressed
Os01g0934800	0.53	1.31	0.79	2.15	4.1	2.91	0.876667	3.05333	1.80028	6.8139e-05	0.000791726	Up	esterase putative expressed
Os04g0616600	1.14	1.62	1.38	4.18	4.14	6.08	1.38	4.8	1.79837	1.79698e-09	7.18405e-08	Up	leucine-rich repeat-containing protein kinase family protein putative expressed
Os05g0542500	7.76	4.23	3.67	22.15	12.48	19.76	5.22	18.13	1.79626	1.57182e-08	5.10695e-07	Up	late embryogenesis abundant protein group 3 putative expressed
Os12g0607000	28.23	24.19	28.53	75.79	104.24	100.9	26.9833	93.6433	1.79511	3.37418e-31	1.49391e-28	Up	homocysteine S-methyltransferase protein putative expressed
Os05g0527000	1.68	0.67	0.5	1.89	4	3.94	0.95	3.27667	1.78623	0.000287557	0.00269407	Up	anthocyanidin 5 3-O-glucosyltransferase putative expressed
Os07g0552800	0.21	0.1	0.18	0.29	0.66	0.74	0.163333	0.563333	1.78617	0.00202355	0.0136331	Up	CSLF2 - cellulose synthase-like family F%3B beta1 3%3B1 4 glucan synthase expressed
Os09g0400400	0.55	0.59	0.42	0.89	1.21	3.28	0.52	1.79333	1.78606	0.00130241	0.00946001	Up	dehydrogenase putative expressed
Os07g0522500	16.26	11.98	19.58	37.37	55.29	71.9	15.94	54.8533	1.78293	2.50509e-12	1.64405e-10	Up	pleiotropic drug resistance protein 5 putative expressed
Os02g0585100	2.21	0.6	1.9	3.58	7.83	4.79	1.57	5.4	1.78219	0.00062624	0.00513454	Up	heavy metal associated domain containing protein expressed
Os01g0627800	3.21	1.88	2.06	6.44	11.35	6.74	2.38333	8.17667	1.77853	2.9779e-09	1.12674e-07	Up	cytochrome P450 72A1 putative expressed
MSTRG.26250	0.05	0.05	0.04	0.17	0.18	0.13	0.0466667	0.16	1.77761	0.00294206	0.0184554	Up	integrase core domain containing protein [Oryza sativa Japonica Group]
Os10g0535800	4.26	2.45	3.83	8.96	12.51	14.59	3.51333	12.02	1.77452	4.11306e-10	1.89163e-08	Up	uncharacterized Cys-rich domain containing protein putative expressed
Os11g0533400	0.81	0.21	0.74	1.93	1.67	2.41	0.586667	2.00333	1.77179	0.0017276	0.0119626	Up	expressed protein
Os12g0512800	0.71	0.2	0.53	0.7	1.58	2.63	0.48	1.63667	1.76965	0.00283257	0.0178914	Up	cytochrome P450 putative expressed
Os11g0665600	14.21	11.6	14.68	35.3	50.05	52.37	13.4967	45.9067	1.7661	8.21431e-19	1.13864e-16	Up	expressed protein
Os05g0583200	0.43	0.43	0.43	1.4	1.49	1.49	0.43	1.46	1.76356	1.98301e-11	1.13779e-09	Up	transposon protein putative unclassified expressed
Os11g0474900	2.56	1.24	2.63	5.35	7.4	9.03	2.14333	7.26	1.76011	8.9162e-06	0.000138404	Up	terpene synthase putative expressed
Os02g0242900	0.44	0.38	0.56	1.3	1.81	1.56	0.46	1.55667	1.75875	2.40044e-05	0.000325144	Up	hydroquinone glucosyltransferase putative expressed
Os04g0578000	1.83	1.15	2.18	3.75	5.34	8.36	1.72	5.81667	1.75778	4.7241e-07	1.07888e-05	Up	aminotransferase classes I and II domain containing protein expressed
Os02g0575000	9.71	7.01	5.53	16.07	23.54	35.42	7.41667	25.01	1.75366	4.73753e-08	1.39425e-06	Up	expressed protein
Os10g0154500	0.45	0.39	0.59	1.24	2.11	1.47	0.476667	1.60667	1.75302	0.000209144	0.0020632	Up	cyclin-dependent kinase G-1 putative expressed
Os04g0600300	3.39	2.43	2.61	5.71	9.37	13.32	2.81	9.46667	1.75229	4.09294e-08	1.22888e-06	Up	transposon protein putative unclassified expressed
Os06g0591200	32.07	26.55	39.8	126.48	119.72	83.1	32.8067	109.767	1.74238	7.6738e-17	8.75522e-15	Up	expressed protein
Os01g0724700	0.51	0.77	0.33	0.8	2.65	1.93	0.536667	1.79333	1.74055	0.00643431	0.0346716	Up	lachrymatory factor synthase putative expressed
Os07g0516300	13.16	18.45	12.32	33.58	53.55	59.19	14.6433	48.7733	1.73585	4.54727e-13	3.3892e-11	Up	DUF584 domain containing protein putative expressed
Os12g0555000	55.88	20.88	79.04	105.84	205.96	206.88	51.9333	172.893	1.73515	0.00491499	0.0279736	Up	pathogenesis-related Bet v I family protein putative expressed
Os06g0549900	1.02	1.79	1.14	2.53	3.93	6.69	1.31667	4.38333	1.73514	6.94066e-06	0.000111073	Up	reticuline oxidase-like protein precursor putative expressed
Os01g0615100	16.48	9.37	10.17	37.26	30	52.35	12.0067	39.87	1.73147	1.20245e-09	4.99573e-08	Up	inhibitor I family protein putative expressed
Os10g0454200	0.84	2.87	0.41	2.96	3.12	7.58	1.37333	4.55333	1.72924	0.00871208	0.0439291	Up	glycine-rich cell wall structural protein 2 precursor putative expressed
Os06g0553001	2.01	2.53	2.33	4.18	4.62	13.96	2.29	7.58667	1.72812	0.000416188	0.0036526	Up	--
Os05g0545400	0.57	0.33	0.84	1.1	1.75	2.91	0.58	1.92	1.72698	0.000871988	0.00676253	Up	STE_MEKK_ste11_MAP3K.19 - STE kinases include homologs to sterile 7 sterile 11 and sterile 20 from yeast expressed
Os03g0168100	1.08	0.42	1.03	1.96	2.02	4.39	0.843333	2.79	1.72609	0.000326221	0.00299876	Up	embryonic protein DC-8 putative expressed
Os05g0501500	0.14	0.24	0.18	0.49	0.85	0.51	0.186667	0.616667	1.72403	0.00048851	0.00416772	Up	--
Os08g0156900	2.63	2.8	1.9	5.4	13.04	5.67	2.44333	8.03667	1.71775	2.20891e-06	4.18423e-05	Up	OsTOP6A2 - Topoisomerase 6 subunit A homolog 2 expressed
Os01g0950200	0.64	0.56	0.78	2.01	2.96	1.54	0.66	2.17	1.71716	8.13811e-05	0.00092707	Up	--
Os02g0269400	0.47	0.29	0.27	0.91	0.88	1.59	0.343333	1.12667	1.71438	0.000136918	0.00144436	Up	--
Os04g0111200	44.69	41.51	40.64	164.17	144.7	127.65	42.28	145.507	1.78304	0.000823304	0.00642866	Up	Similar to ATP sulfurylase (Fragment)
Os02g0569000	0.7	0.75	0.98	1.55	3.32	3.08	0.81	2.65	1.71	7.67204e-06	0.000120926	Up	cytochrome P450 putative expressed
Os05g0447700	12.23	13.2	14.73	42.6	44.89	43.4	13.3867	43.63	1.70452	1.30575e-50	1.29112e-47	Up	expressed protein
Os07g0174400	1.25	1.54	1.86	4.24	3.81	7.09	1.55	5.04667	1.70306	0.000157683	0.00162414	Up	LTPL75 - Protease inhibitor Fseed storage FLTP family protein precursor expressed
Os02g0290900	0.17	0.37	0.13	0.59	0.72	0.87	0.223333	0.726667	1.7021	0.00529295	0.0296469	Up	GDSL-like lipase Facylhydrolase putative expressed
Os04g0482300	22.95	30.54	27.8	47.56	91.84	125.05	27.0967	88.15	1.70185	3.19374e-09	1.20227e-07	Up	BTBZ4 - Bric-a-Brac Tramtrack Broad Complex BTB domain with TAZ zinc finger and Calmodulin-binding domains expressed
Os07g0115500	8.63	12.43	13.03	30.59	33.11	47.15	11.3633	36.95	1.70119	4.93958e-13	3.65406e-11	Up	expressed protein
Os05g0528500	0.7	0.29	0.86	2.72	1.79	1.49	0.616667	2	1.69744	0.00882597	0.0443827	Up	WRKY58 expressed
Os12g0594600	0.73	0.49	1.51	1.43	3.76	3.66	0.91	2.95	1.69678	0.00253085	0.0163562	Up	SKP1 putative expressed
Os01g0175400	0.1	0.24	0.24	0.75	0.6	0.53	0.193333	0.626667	1.69661	0.00663242	0.0355198	Up	fibronectin type 3 and ankyrin repeat domains 1 protein putative expressed
Os07g0523965	50.73	53.22	54.63	188.82	181.53	143.04	52.86	171.13	1.69484	7.09173e-37	4.29325e-34	Up	transporter family protein putative expressed
Os07g0656600	2.13	1.55	1.76	6.67	5.01	5.93	1.81333	5.87	1.69472	2.91258e-11	1.63016e-09	Up	uncharacterized UPF0114 domain containing protein expressed
Os08g0514000	0.6	0.51	0.41	1.57	1.41	1.93	0.506667	1.63667	1.69165	6.97544e-05	0.000809544	Up	lectin-like protein kinase putative expressed
Os12g0576750	0.18	0.43	0.23	0.9	0.67	1.14	0.28	0.903333	1.68983	0.000468178	0.00401504	Up	nucleotide pyrophosphatase Fphosphodiesterase putative expressed
Os10g0509700	0.36	0.35	0.49	0.87	1.59	1.4	0.4	1.28667	1.68557	0.000310911	0.00287586	Up	--
Os07g0523600	45.1	47.14	47.78	165.32	157.31	126.46	46.6733	149.697	1.68137	2.939e-38	2.0275e-35	Up	transporter family protein putative expressed
Os11g0171100	0.14	0.29	0.25	0.82	0.83	0.53	0.226667	0.726667	1.68072	0.00237259	0.0155179	Up	expressed protein
Os07g0125500	10.08	20.32	15.28	23.76	41.28	81.25	15.2267	48.7633	1.6792	0.0037349	0.0224003	Up	SCP-like extracellular protein expressed
Os11g0626700	0.65	0.66	0.68	2.15	2.47	1.75	0.663333	2.12333	1.67852	8.10515e-09	2.80878e-07	Up	expressed protein
Os03g0739700	7.44	10.83	13.58	23.47	35.73	42.7	10.6167	33.9667	1.67779	5.76149e-10	2.53574e-08	Up	uncharacterized UPF0114 domain containing protein expressed
Os03g0142500	0.41	0.22	0.54	0.71	1.29	1.74	0.39	1.24667	1.67653	0.000433396	0.00377016	Up	zinc finger family protein putative expressed
Os07g0124900	4.54	9.42	7.08	10.91	18.79	37.53	7.01333	22.41	1.67597	6.09984e-05	0.000721187	Up	SCP-like extracellular protein expressed
Os04g0480200	3.6	2.91	2.75	3.46	6.35	19.7	3.08667	9.83667	1.67212	0.00185597	0.0127149	Up	high affinity nitrate transporter putative expressed
Os03g0168000	0.3	0.14	0.42	0.89	1.03	0.82	0.286667	0.913333	1.67177	0.000777278	0.00614858	Up	lactose permease-related putative expressed
Os08g0507100	0.32	0.18	0.28	0.68	1.04	0.76	0.26	0.826667	1.66879	0.000686094	0.00552601	Up	cytochrome P450 putative expressed
Os08g0203100	0.32	0.31	0.44	1.01	0.95	1.44	0.356667	1.13333	1.66792	1.94655e-05	0.000271857	Up	SHR5-receptor-like kinase putative expressed
Os08g0299400	0.44	0.52	0.35	1.47	1.35	1.34	0.436667	1.38667	1.66702	1.95352e-05	0.000272574	Up	MGD2 putative expressed
Os01g0955100	2.54	3.18	6.96	5.8	10.42	24.01	4.22667	13.41	1.66572	0.00162037	0.0113552	Up	OsCML31 - Calmodulin-related calcium sensor protein expressed
Os07g0126301	9.18	18.96	14.34	21.73	37.96	75	14.16	44.8967	1.66479	0.00448667	0.0260404	Up	SCP-like extracellular protein expressed
Os04g0521100	1.1	1.81	1.2	2.31	5.56	5.14	1.37	4.33667	1.66241	2.69268e-05	0.000358026	Up	aquaporin protein putative expressed
Os11g0549300	0.25	0.2	0.64	0.98	1.62	0.84	0.363333	1.14667	1.65808	0.0080151	0.0410994	Up	TKL_IRAK_DUF26-lc.29 - DUF26 kinases have homology to DUF26 containing loci expressed
Os02g0733900	0.73	1.17	0.59	1.78	1.47	4.56	0.83	2.60333	1.64918	0.00645875	0.0347907	Up	expressed protein
Os01g0795200	5.05	3.95	5.45	10.65	11.7	22.91	4.81667	15.0867	1.64717	1.8629e-08	5.98062e-07	Up	OsSub8 - Putative Subtilisin homologue expressed
Os07g0262800	0.1	0.17	0.47	0.76	0.94	0.61	0.246667	0.77	1.6423	0.00688947	0.036586	Up	legume lectins beta domain containing protein expressed
Os06g0185500	0.84	1.6	0.9	1.8	3.21	5.37	1.11333	3.46	1.63589	0.000323191	0.00297645	Up	transferase family protein putative expressed
Os01g0920450	2.82	2.7	2.52	7.14	9.8	8.03	2.68	8.32333	1.63493	1.31408e-05	0.000193777	Up	regulatory protein putative expressed
Os04g0395800	1.19	1.15	1.28	3.79	3.14	4.31	1.20667	3.74667	1.63458	7.88293e-08	2.19774e-06	Up	zinc-finger protein putative expressed
MSTRG.19903	0.37	0.5	0.29	0.96	1.37	1.27	0.386667	1.2	1.63387	0.00346877	0.0210726	Up	--
Os10g0394000	0.64	0.75	1.76	1.55	4.34	3.88	1.05	3.25667	1.63301	0.00143312	0.0102291	Up	GDSL-like lipase Facylhydrolase putative expressed
Os11g0147150	1.09	0.99	0.91	3.14	2.76	3.36	0.996667	3.08667	1.63087	1.08988e-06	2.23121e-05	Up	--
Os06g0112700	0.63	0.94	1.23	2.44	3.52	2.71	0.933333	2.89	1.63061	9.40252e-06	0.000144967	Up	MYB family transcription factor putative expressed
Os02g0259850	2.44	2.85	3.18	9.65	8.12	8.44	2.82333	8.73667	1.62968	2.04013e-14	1.79579e-12	Up	--
Os07g0124400	1.12	0.55	1.27	2.36	3.08	3.64	0.98	3.02667	1.62688	0.000167386	0.00170923	Up	--
Os12g0571100	13.81	20.67	29.65	43.5	86.99	67.43	21.3767	65.9733	1.62585	2.1419e-07	5.3891e-06	Up	metallothionein putative expressed
Os09g0561500	0.2	0.18	0.38	0.64	0.63	1.07	0.253333	0.78	1.62244	0.00114403	0.00850324	Up	OsWAK90 - OsWAK receptor-like protein kinase expressed
Os03g0289800	5.18	4.39	4.5	20.82	10.78	11.64	4.69	14.4133	1.61974	2.52659e-09	9.70839e-08	Up	leucoanthocyanidin dioxygenase putative expressed
MSTRG.33466	0.17	0.21	0.31	0.67	0.62	0.83	0.23	0.706667	1.6194	0.000322156	0.00296784	Up	PREDICTED: calponin homology domain-containing protein DDB_G0272472 [Oryza sativa Japonica Group]
Os04g0172400	0.95	1.17	1.41	2.98	3.97	3.89	1.17667	3.61333	1.61862	8.65804e-09	2.9589e-07	Up	transferase family protein putative expressed
Os03g0288000	16.8	11.9	6.76	32.37	43.89	32.43	11.82	36.23	1.61595	8.84985e-08	2.44434e-06	Up	metallothionein putative expressed
Os05g0198200	6.68	6.42	9.36	15.27	15.12	38.38	7.48667	22.9233	1.61442	7.64119e-06	0.000120504	Up	OsGrx_C15 - glutaredoxin subgroup III expressed
Os04g0661100	0.55	0.55	0.52	1.82	2.09	1.05	0.54	1.65333	1.61435	0.00699083	0.037038	Up	heavy metal-associated domain containing protein expressed
Os02g0770500	0.29	0.24	0.45	0.78	0.93	1.29	0.326667	1	1.61411	0.000211444	0.00208243	Up	WRKY32 expressed
Os07g0541200	2.61	2.84	3.87	6.68	11.15	10.61	3.10667	9.48	1.60952	3.07493e-10	1.44327e-08	Up	TKL_IRAK_DUF26-lc22 - DUF26 kinases have homology to DUF26 containing loci expressed
Os04g0578550	4.3	3.54	4.28	12.6	12.71	11.65	4.04	12.32	1.60858	2.58092e-17	3.07472e-15	Up	--
Os08g0434300	15.65	11.24	10.38	40.86	36.93	35.57	12.4233	37.7867	1.60482	5.59266e-20	9.01635e-18	Up	lactate Fmalate dehydrogenase putative expressed
Os01g0608900	0.3	0.49	0.22	0.8	1.27	1	0.336667	1.02333	1.60388	0.000138341	0.00145678	Up	--
Os03g0758100	18.09	15.21	13.76	52.47	42.87	47.48	15.6867	47.6067	1.60162	4.40994e-31	1.92377e-28	Up	alpha-glucan phosphorylast isozyme putative expressed
Os05g0576600	6.04	6.02	5.57	12.04	16.2	25.25	5.87667	17.83	1.60124	6.31443e-09	2.23374e-07	Up	expressed protein
Os03g0192550	0.83	0.59	0.7	2.18	1.85	2.4	0.706667	2.14333	1.60075	8.32468e-05	0.000945418	Up	--
Os12g0153200	5.14	2.75	2.71	13.07	9.38	9.61	3.53333	10.6867	1.59671	1.56112e-07	4.0551e-06	Up	expressed protein
MSTRG.13384	0.64	0.31	0.26	1.27	1.3	1.08	0.403333	1.21667	1.59289	0.000217547	0.00213192	Up	--
Os10g0392400	4.7	3.54	3.75	13.27	10.23	12.62	3.99667	12.04	1.59097	5.22289e-14	4.33982e-12	Up	ZIM domain containing protein putative expressed
Os10g0569500	1.38	1.59	1.53	4.06	5.72	3.77	1.5	4.51667	1.5903	6.29596e-06	0.00010228	Up	RALFL27 - Rapid ALkalinization Factor RALF family protein precursor expressed
Os11g0238400	0.63	0.59	0.74	1.66	2.56	1.67	0.653333	1.96333	1.58741	0.000776069	0.00614505	Up	expressed protein
Os07g0129200	12.11	5.94	12.42	28.22	35.57	27.76	10.1567	30.5167	1.58717	8.72282e-09	2.9776e-07	Up	SCP-like extracellular protein expressed
Os12g0245000	1.53	1.41	3.25	6.14	8.66	3.78	2.06333	6.19333	1.58574	0.000105684	0.00115725	Up	expressed protein
Os06g0606700	40.7	40.54	58.38	80.19	174.86	163.96	46.54	139.67	1.58548	7.57668e-09	2.63797e-07	Up	expressed protein
Os12g0562700	0.39	0.37	0.15	1.12	0.72	0.89	0.303333	0.91	1.58496	0.000144057	0.00150864	Up	ABC transporter ATP-binding protein putative expressed
Os07g0283125	1.19	0.38	0.7	1.62	1.62	3.57	0.756667	2.27	1.58496	0.00125627	0.00918073	Up	lectin-like receptor kinase putative expressed
Os06g0146600	3.23	1.41	2.23	7.84	6.97	5.78	2.29	6.86333	1.58356	4.94009e-06	8.30741e-05	Up	expressed protein
Os11g0117400	24.26	13.66	20.79	56.6	67.21	51.44	19.57	58.4167	1.57774	9.14919e-13	6.44659e-11	Up	WRKY104 expressed
Os02g0504700	0.61	1.11	1.24	4.61	2.42	1.79	0.986667	2.94	1.57518	0.00252094	0.0162993	Up	expressed protein
Os09g0439200	9.1	7.65	6.79	26.82	24.94	18.37	7.84667	23.3767	1.57492	1.49627e-15	1.49446e-13	Up	zinc-finger protein putative expressed
Os03g0650200	3.28	2.61	1.9	3.02	11.19	8.93	2.59667	7.71333	1.57069	0.000193129	0.0019296	Up	cytochrome P450 putative expressed
Os05g0119100	0.76	0.87	1.14	2.18	3.65	2.39	0.923333	2.74	1.56925	0.00152623	0.0107853	Up	expressed protein
Os11g0670900	31.48	28.3	30.45	63.49	88.03	116.01	30.0767	89.1767	1.56802	6.18315e-14	5.05281e-12	Up	expressed protein
Os11g0607900	0.46	0.21	0.62	1.16	0.71	1.95	0.43	1.27333	1.5662	0.00233738	0.0153399	Up	jacalin-like lectin domain containing protein expressed
Os11g0482901	1.71	1.75	1.11	5.44	4.1	3.97	1.52333	4.50333	1.56376	8.58084e-10	3.65721e-08	Up	--
Os09g0561600	0.34	0.22	0.11	0.62	0.46	0.9	0.223333	0.66	1.56327	0.00399142	0.0236778	Up	OsWAK91 - OsWAK receptor-like protein kinase expressed
Os01g0816100	6.67	6.8	7.75	14.85	24.1	23.75	7.07333	20.9	1.56304	7.48565e-13	5.32504e-11	Up	NAC domain transcription factor putative expressed
Os01g0628900	2.69	1.5	1.54	4.11	6.63	6.19	1.91	5.64333	1.56297	3.88274e-07	9.13382e-06	Up	cytochrome P450 72A1 putative expressed
Os02g0175700	0.2	0.22	0.24	0.38	0.85	0.72	0.22	0.65	1.56294	0.00252563	0.0163261	Up	ANTH FENTH domain containing protein putative expressed
Os08g0203201	1.25	0.96	0.38	2.19	1.82	3.64	0.863333	2.55	1.56251	0.00877442	0.0441609	Up	SHR5-receptor-like kinase putative expressed
Os01g0920500	3	2.07	2.96	7.48	8.25	7.93	2.67667	7.88667	1.55898	5.97742e-10	2.62299e-08	Up	regulatory protein putative expressed
Os10g0491400	4.55	2.21	4.14	9.75	14.12	8.1	3.63333	10.6567	1.55239	1.30865e-05	0.000193133	Up	expressed protein
Os01g0337500	0.83	0.64	1.36	1.95	2.69	3.64	0.943333	2.76	1.54883	1.96781e-05	0.000274182	Up	inorganic H B pyrophosphatase putative expressed
Os06g0569500	7.44	5.45	9.07	14.62	22.03	27.52	7.32	21.39	1.54702	5.47707e-09	1.96459e-07	Up	cytochrome P450 putative expressed
Os07g0569800	0.39	0.34	0.24	0.85	0.86	1.12	0.323333	0.943333	1.54475	0.000152017	0.00157617	Up	expressed protein
Os07g0416700	1.79	2.18	2.79	5	6.75	7.9	2.25333	6.55	1.53943	6.63857e-08	1.88143e-06	Up	expressed protein
Os07g0122100	2.11	1.69	1.1	4.53	4.64	5.04	1.63333	4.73667	1.53605	3.34294e-09	1.25208e-07	Up	expressed protein
Os06g0493100	24.33	16.24	21.99	70.07	59.2	52.14	20.8533	60.47	1.53594	9.98033e-15	9.05371e-13	Up	RALFL28 - Rapid ALkalinization Factor RALF family protein precursor expressed
Os01g0812800	8.85	5.85	5.16	15.3	23.21	18.92	6.62	19.1433	1.53194	1.42339e-08	4.68629e-07	Up	ribosomal protein L7Ae putative expressed
Os01g0940700	52.27	33.17	61.03	134.36	182.3	106.82	48.8233	141.16	1.53169	1.31542e-09	5.41953e-08	Up	glycosyl hydrolases family 17 putative expressed
Os01g0920700	0.89	0.83	0.91	2.16	2.59	2.85	0.876667	2.53333	1.53094	2.88858e-07	7.0757e-06	Up	regulatory protein putative expressed
Os07g0448200	0.51	1.13	0.78	1.69	3.25	2.05	0.806667	2.33	1.53029	0.00111233	0.00830304	Up	aquaporin protein putative expressed
Os04g0669900	14.25	13.42	16.87	37.74	44.05	46.86	14.8467	42.8833	1.53028	1.22348e-24	3.24047e-22	Up	methylthioribose kinase putative expressed
Os01g0795250	0.9	1.06	0.96	2.21	2.19	4.03	0.973333	2.81	1.52956	2.58758e-06	4.79138e-05	Up	--
Os10g0467850	0.16	0.34	0.11	0.64	0.56	0.56	0.203333	0.586667	1.52869	0.0019909	0.0134559	Up	--
Os04g0585900	0.92	1.56	0.8	3.41	3.6	2.44	1.09333	3.15	1.52662	0.000121835	0.00131184	Up	DUF581 domain containing protein expressed
Os04g0640300	1.73	1.2	0.86	3.45	3.41	4.05	1.26333	3.63667	1.52538	2.9234e-06	5.31696e-05	Up	expressed protein
MSTRG.10136	22.78	15.07	25.17	38.91	76.05	66.26	21.0067	60.4067	1.52386	8.50336e-09	2.92287e-07	Up	PREDICTED: benzyl alcohol O-benzoyltransferase-like [Oryza sativa Japonica Group]
Os04g0178400	2.21	3.21	4.88	8.18	9.73	11.67	3.43333	9.86	1.52198	2.52744e-07	6.25827e-06	Up	cytochrome P450 putative expressed
Os09g0127300	14.75	12.04	12.71	38.39	34.26	40.68	13.1667	37.7767	1.52061	1.54814e-30	6.29094e-28	Up	dehydrogenase putative expressed
Os05g0130300	2.93	3.72	5.31	15.18	8.63	10.47	3.98667	11.4267	1.51915	1.14625e-06	2.33211e-05	Up	expressed protein
Os04g0654500	0.51	0.53	0.63	1.61	1.35	1.82	0.556667	1.59333	1.51716	7.62611e-05	0.000876826	Up	glycine rich protein family protein putative expressed
Os06g0162700	0.14	0.24	0.18	0.37	0.58	0.65	0.186667	0.533333	1.51457	0.00764882	0.0396184	Up	MYB family transcription factor putative expressed
Os07g0121100	0.19	0.17	0.12	0.41	0.57	0.39	0.16	0.456667	1.51307	0.00321527	0.01985	Up	expressed protein
Os09g0309700	8.8	8.33	10.56	26.74	28.16	23.82	9.23	26.24	1.50737	3.34863e-25	9.11319e-23	Up	AP2 domain containing protein expressed
MSTRG.8088	0.91	0.96	1.06	2.96	2.33	3.02	0.976667	2.77	1.50395	1.60064e-10	7.87419e-09	Up	--
Os01g0891700	1.18	0.74	0.82	2.62	2.02	3.12	0.913333	2.58667	1.50188	5.74668e-06	9.44849e-05	Up	inactive receptor kinase At2g26730 precursor putative expressed
Os02g0818900	0.52	0.59	1.45	1.69	2.39	3.17	0.853333	2.41667	1.50184	0.00290554	0.01828	Up	expressed protein
Os05g0318100	0.82	1	0.26	1.23	2.67	1.99	0.693333	1.96333	1.50168	0.00264242	0.0169188	Up	tyrosine protein kinase domain containing protein putative expressed
Os12g0434400	1.18	0.99	1.07	2.28	2.32	4.55	1.08	3.05	1.49778	3.1878e-05	0.000413843	Up	leucine aminopeptidase chloroplast precursor putative expressed
Os08g0288500	11.67	13.4	12.67	34.94	38.16	33.47	12.58	35.5233	1.49764	3.35536e-44	2.84381e-41	Up	G-patch domain containing protein expressed
Os12g0268100	3.08	2.7	2.41	4.99	8.72	9.41	2.73	7.70667	1.49721	1.99953e-08	6.371e-07	Up	--
Os03g0277300	6.04	5.3	5.7	18.03	11.84	18.21	5.68	16.0267	1.49651	8.66986e-15	7.91331e-13	Up	DnaK family protein putative expressed
Os11g0126800	2.14	2.1	3.73	6.38	8.76	7.33	2.65667	7.49	1.49535	3.82864e-06	6.6729e-05	Up	nucleoside-triphosphatase putative expressed
Os11g0666200	1.29	0.66	2.01	2.88	4.41	3.84	1.32	3.71	1.49088	0.000237541	0.00230125	Up	protein kinase putative expressed
Os10g0552400	4.94	3.72	4.48	11.6	12.61	12.67	4.38	12.2933	1.48887	2.90837e-19	4.33537e-17	Up	U-box domain containing protein expressed
Os10g0560000	19.19	16.29	25.17	50.15	60.61	58.95	20.2167	56.57	1.48449	3.67967e-15	3.53249e-13	Up	expressed protein
Os01g0172100	10.86	13.02	13.22	28.48	33.14	42.08	12.3667	34.5667	1.48292	4.35942e-17	5.11412e-15	Up	phosphate Fphosphoenolpyruvate translocator-related protein putative expressed
MSTRG.5906	5.65	5.94	14.07	19.69	24.42	27.55	8.55333	23.8867	1.48165	2.5972e-05	0.00034783	Up	PREDICTED: cylicin-2 [Oryza sativa Japonica Group]
Os02g0504000	17.09	16.15	20.73	44.86	48.11	57.73	17.99	50.2333	1.48145	1.16137e-21	2.20838e-19	Up	cytochrome P450 putative expressed
Os09g0521300	0.3	0.22	0.43	1	0.87	0.78	0.316667	0.883333	1.47999	0.00560366	0.0310357	Up	TCP family transcription factor putative expressed
Os07g0538000	0.55	0.4	0.39	1.01	0.93	1.79	0.446667	1.24333	1.47694	0.000492917	0.00419687	Up	glucan endo-1 3-beta-glucosidase precursor putative expressed
Os05g0444200	2.83	3.14	5.07	11.62	9.7	9.4	3.68	10.24	1.47644	5.06015e-09	1.83177e-07	Up	ZOS5-08 - C2H2 zinc finger protein expressed
Os11g0643100	1.56	1.3	1.47	1.49	2.34	8.18	1.44333	4.00333	1.4718	0.00755642	0.0392289	Up	transferase family protein putative expressed
Os01g0885700	0.23	0.25	0.13	0.31	0.54	0.84	0.203333	0.563333	1.47014	0.00831282	0.042297	Up	S-locus-like receptor protein kinase putative expressed
Os04g0600200	15.63	10.94	15.02	39.31	41.41	34.25	13.8633	38.3233	1.46695	1.17123e-17	1.44764e-15	Up	transposon protein putative unclassified expressed
Os02g0512000	0.68	0.81	0.82	1.78	1.6	3	0.77	2.12667	1.46566	0.00020474	0.00202717	Up	OsSAUR10 - Auxin-responsive SAUR gene family member expressed
Os01g0776500	1.6	1.5	1.54	3.94	5.23	3.63	1.54667	4.26667	1.46395	1.44756e-11	8.50304e-10	Up	expressed protein
MSTRG.12129	0.42	0.45	0.41	1.16	1.27	1.1	0.426667	1.17667	1.46352	1.04134e-07	2.81589e-06	Up	--
Os08g0156100	2.5	1.29	1.29	6.01	5.35	2.61	1.69333	4.65667	1.45943	0.00144058	0.0102774	Up	expressed protein
Os03g0721900	4.86	3.68	4.87	12.81	13.85	10.21	4.47	12.29	1.45914	2.47043e-08	7.68164e-07	Up	Core histone H2A FH2B FH3 FH4 domain containing protein putative expressed
Os05g0194900	4.28	2.98	5.39	9.68	11.95	13.08	4.21667	11.57	1.45621	2.17169e-08	6.87524e-07	Up	6-phosphofructokinase putative expressed
Os06g0704000	0.31	0.24	0.22	0.68	0.56	0.87	0.256667	0.703333	1.45431	0.000630535	0.00515592	Up	hAT dimerisation domain containing protein expressed
Os07g0129900	0.25	0.19	0.33	0.38	0.82	0.91	0.256667	0.703333	1.45431	0.00767862	0.0397311	Up	lectin-like receptor kinase 7 putative expressed
Os09g0545100	1.3	0.83	1.13	3.95	2.95	2.02	1.08667	2.97333	1.45217	0.00178765	0.0123294	Up	retrotransposon protein putative unclassified expressed
MSTRG.26379	0.37	0.31	0.52	1.04	0.8	1.44	0.4	1.09333	1.45066	0.00590313	0.0323471	Up	--
MSTRG.32560	0.96	1.09	1.22	1.54	1.73	5.66	1.09	2.97667	1.44937	0.00835168	0.0424583	Up	--
Os07g0550900	1.41	1.14	1.25	3.62	2.77	3.96	1.26667	3.45	1.44556	2.74733e-11	1.5435e-09	Up	KI domain interacting kinase 1 putative expressed
Os02g0595900	0.93	1.71	1.86	2.17	2.79	7.29	1.5	4.08333	1.44478	0.00544185	0.0302979	Up	high affinity nitrate transporter putative expressed
Os05g0194500	2.34	2.87	2.82	8.45	7.54	5.81	2.67667	7.26667	1.44086	7.888e-11	4.06232e-09	Up	no apical meristem protein putative expressed
Os06g0681200	2.62	2.91	3.78	6.09	4.64	14.52	3.10333	8.41667	1.43943	0.000566495	0.00472434	Up	early nodulin 20 precursor putative expressed
Os07g0523400	9.4	9.79	9.62	27.71	27.74	22.61	9.60333	26.02	1.43801	1.38459e-29	5.19904e-27	Up	transporter family protein putative expressed
Os03g0259100	14.01	9.23	18.03	23.11	44.78	43.75	13.7567	37.2133	1.43569	3.68492e-06	6.47184e-05	Up	plastocyanin-like domain containing protein putative expressed
Os01g0859100	0.69	0.42	0.58	1.82	1.48	1.27	0.563333	1.52333	1.43517	7.99433e-05	0.000912793	Up	ZOS1-17 - C2H2 zinc finger protein expressed
Os06g0133500	4.26	4.98	5.57	9.65	8.23	22.12	4.93667	13.3333	1.43343	0.000795813	0.00625848	Up	expressed protein
Os12g0162800	1.89	1.89	2.14	5.06	5.64	5.28	1.97333	5.32667	1.4326	2.12023e-13	1.63788e-11	Up	expressed protein
Os06g0701700	6.13	5.44	7.83	20.66	17.29	14.4	6.46667	17.45	1.43213	1.45236e-11	8.51438e-10	Up	OsHKT2%3B1 - Na B transporter expressed
Os01g0830900	0.73	0.41	0.73	2.11	1.95	0.98	0.623333	1.68	1.43039	0.00875296	0.0440828	Up	zinc finger C3HC4 type domain containing protein expressed
Os12g0138900	13.05	10.72	10.2	23.81	36.87	30.6	11.3233	30.4267	1.42604	1.46516e-14	1.31307e-12	Up	2-isopropylmalate synthase B putative expressed
Os01g0831250	0.52	0.55	0.6	1.55	1.1	1.83	0.556667	1.49333	1.42365	0.000234423	0.00227401	Up	--
Os02g0623600	0.17	0.2	0.1	0.48	0.29	0.49	0.156667	0.42	1.42269	0.00871554	0.0439316	Up	OsWAK12 - OsWAK receptor-like cytoplasmic kinase OsWAK-RLCK expressed
Os01g0136200	14.21	14.07	14.31	36.28	37.86	39.85	14.1967	37.9967	1.42032	7.3019e-33	3.67125e-30	Up	hsp20 Falpha crystallin family protein putative expressed
Os07g0104500	0.57	0.4	0.36	0.55	1.31	1.69	0.443333	1.18333	1.41639	0.00859777	0.0434784	Up	peroxidase precursor putative expressed
Os06g0683100	2.06	2.06	2.19	5.44	4.67	6.72	2.10333	5.61	1.41532	2.02328e-09	7.94607e-08	Up	dihydroflavonol-4-reductase putative expressed
Os04g0625350	0.6	0.43	0.48	1.67	1.2	1.15	0.503333	1.34	1.41265	3.74367e-07	8.84174e-06	Up	expressed protein
Os04g0538900	1.83	1.08	3.56	3.28	7.03	6.9	2.15667	5.73667	1.41141	0.00485721	0.0276896	Up	glyoxalase family protein putative expressed
MSTRG.34718	1.4	1.14	1.6	4.37	3.44	3.2	1.38	3.67	1.41111	2.91157e-09	1.10587e-07	Up	--
Os01g0157800	2.05	2.04	1.66	4.87	7.23	3.19	1.91667	5.09667	1.41095	0.000248186	0.00238645	Up	heat shock protein DnaJ putative expressed
Os08g0384500	6.69	5.44	8.7	17.27	18.55	19.52	6.94333	18.4467	1.40966	8.74127e-14	7.04622e-12	Up	pleiotropic drug resistance protein 3 putative expressed
MSTRG.31092	0.35	0.22	0.51	0.97	0.83	1.06	0.36	0.953333	1.40498	0.00777075	0.0401378	Up	--
Os09g0454600	5.16	2.98	2.86	5.32	7.59	16.2	3.66667	9.70333	1.40401	0.000696123	0.00559312	Up	phosphate carrier protein mitochondrial precursor putative expressed
Os11g0151200	0.8	0.66	0.69	1.95	2.12	1.61	0.716667	1.89333	1.40155	3.25113e-06	5.80973e-05	Up	--
Os02g0259900	5.05	5.22	7.16	16.07	13.86	16.07	5.81	15.3333	1.40006	1.00895e-13	8.06723e-12	Up	expressed protein
Os11g0548600	1.18	1.24	1.68	2.83	4.49	3.49	1.36667	3.60333	1.39867	0.000129548	0.00138334	Up	lysM domain-containing GPI-anchored protein precursor putative expressed
Os07g0131001	3.04	1.75	2.41	5.08	6.8	7.1	2.4	6.32667	1.39841	4.30622e-08	1.27996e-06	Up	--
Os04g0514600	1.24	0.71	0.85	1.65	2.47	3.25	0.933333	2.45667	1.39624	3.23116e-05	0.000418073	Up	NB-ARC FLRR disease resistance protein putative expressed
Os02g0209300	2.85	1.36	2.12	4.04	5.84	6.78	2.11	5.55333	1.39611	0.000418821	0.00367136	Up	expressed protein
Os04g0341500	3.09	2.64	3.25	10.26	8.6	4.71	2.99333	7.85667	1.39216	4.46249e-07	1.02696e-05	Up	terpene synthase putative expressed
Os07g0509800	109.64	119	124.86	222.82	361.71	342.86	117.833	309.13	1.39147	2.21896e-14	1.94169e-12	Up	OsAPRL1 adenosine 5 7-phosphosulfate reductase-like OsAPRL1 expressed
Os01g0793800	1.58	0.97	1.35	2.22	2.38	5.63	1.3	3.41	1.39126	0.00664796	0.0355773	Up	expressed protein
Os08g0562300	1.58	0.98	1.21	2.93	3.98	2.95	1.25667	3.28667	1.38702	4.2608e-06	7.29749e-05	Up	ZOS8-14 - C2H2 zinc finger protein expressed
Os05g0488100	3.53	2.3	3.83	8.31	9.51	7.44	3.22	8.42	1.38676	5.68957e-09	2.03589e-07	Up	expressed protein
Os08g0170700	0.58	0.17	0.41	1.1	0.69	1.24	0.386667	1.01	1.38519	0.00442829	0.0257547	Up	retrotransposon protein putative unclassified expressed
Os03g0724700	5.22	4.5	5.36	12.35	14.88	12.08	5.02667	13.1033	1.38226	4.9542e-16	5.17469e-14	Up	maf putative expressed
Os12g0616500	0.81	1.25	1.48	2.05	3.09	4.08	1.18	3.07333	1.38102	9.8237e-05	0.00108564	Up	ATCHX putative expressed
Os10g0520100	0.47	0.2	0.39	0.83	0.79	1.14	0.353333	0.92	1.3806	0.00987294	0.0485666	Up	OsFBDUF49 - F-box and DUF domain containing protein expressed
Os03g0797400	7.38	6.95	7.99	25.33	22.16	10.54	7.44	19.3433	1.37846	3.12019e-06	5.61634e-05	Up	indole-3-glycerol phosphate lyase chloroplast precursor putative expressed
Os05g0104700	0.35	0.39	0.17	0.73	0.84	0.79	0.303333	0.786667	1.37485	0.00477603	0.0273137	Up	polygalacturonase inhibitor precursor putative expressed
Os01g0369200	0.72	0.52	0.48	1.18	1.57	1.71	0.573333	1.48667	1.37464	1.18131e-05	0.000177071	Up	cullin putative expressed
Os04g0531900	12.81	10.68	10.02	27.44	31.39	28.05	11.17	28.96	1.37443	5.22818e-22	1.02032e-19	Up	short-chain dehydrogenase Freductase putative expressed
Os12g0518200	2.63	1.48	3.23	5.35	6.9	6.76	2.44667	6.33667	1.37291	7.71502e-06	0.000121539	Up	integral membrane protein DUF6 containing protein expressed
Os04g0493400	158.72	98.84	108.89	281.23	310.69	355.36	122.15	315.76	1.37017	2.71566e-13	2.08698e-11	Up	CHIT2 - Chitinase family protein precursor expressed
Os05g0111200	19.58	18.61	22.79	58.29	46.52	52.32	20.3267	52.3767	1.36555	4.83289e-19	6.95936e-17	Up	mitochondrial import inner membrane translocase subunit Tim17 putative expressed
Os02g0615800	2.89	2.26	2.73	7.71	3.26	9.33	2.62667	6.76667	1.36521	6.66183e-05	0.000776369	Up	receptor kinase putative expressed
MSTRG.7914	0.34	0.62	0.24	1	1.28	0.81	0.4	1.03	1.36457	0.00460675	0.0265814	Up	Rtac1 [Oryza sativa Japonica Group]
Os07g0192000	4.88	2.77	2.87	9.26	10.1	7.72	3.50667	9.02667	1.36409	1.05556e-07	2.84656e-06	Up	ATPase putative expressed
Os10g0569600	71.99	61.26	79.92	183.72	234.93	129.78	71.0567	182.81	1.3633	1.96062e-09	7.72377e-08	Up	RALFL27 - Rapid ALkalinization Factor RALF family protein precursor expressed
Os01g0627900	0.94	0.58	0.74	1.11	2.27	2.43	0.753333	1.93667	1.36222	0.000525016	0.00443454	Up	cytochrome P450 72A1 putative expressed
Os05g0526900	3.55	2.52	2.88	8.05	7.86	7.07	2.98333	7.66	1.36042	9.39618e-13	6.58932e-11	Up	anthocyanidin 5 3-O-glucosyltransferase putative expressed
Os01g0734000	1.57	2.05	1.55	5.13	4.62	3.51	1.72333	4.42	1.35884	1.20084e-06	2.43151e-05	Up	WRKY23 expressed
Os01g0939500	4.3	2.84	5.56	11.9	11.78	8.86	4.23333	10.8467	1.35739	7.09505e-07	1.54189e-05	Up	eukaryotic peptide chain release factor subunit 1-1 putative expressed
Os04g0624800	0.84	0.76	0.61	1.43	2.67	1.56	0.736667	1.88667	1.35676	0.000602765	0.00497632	Up	RNA recognition motif containing protein putative expressed
Os12g0161500	0.47	0.33	0.44	0.93	1.2	1.04	0.413333	1.05667	1.35414	0.00016545	0.0016918	Up	expressed protein
Os05g0583000	2.21	2.77	3.01	7.47	6.64	6.31	2.66333	6.80667	1.35372	4.40379e-11	2.37085e-09	Up	WRKY8 expressed
Os02g0569900	3.11	1.59	3.08	4.02	7.92	7.94	2.59333	6.62667	1.35348	0.000124862	0.00133956	Up	cytochrome P450 putative expressed
Os05g0142900	1	0.95	0.86	2.94	1.9	2.34	0.936667	2.39333	1.35341	0.00245576	0.0159421	Up	expressed protein
Os04g0188500	1.09	1.45	1.23	2.41	3.94	3.28	1.25667	3.21	1.35297	0.000738626	0.00588204	Up	expressed protein
Os03g0126000	27.52	24.62	24.24	64.61	52.26	78.04	25.46	64.97	1.35154	6.78808e-17	7.80472e-15	Up	anthranilate phosphoribosyltransferase chloroplast precursor putative expressed
Os05g0447800	2.29	0.97	1.47	3.92	4.19	3.95	1.57667	4.02	1.35032	0.000444823	0.00385037	Up	expressed protein
Os01g0764800	3.89	2.83	4.19	8.41	11.75	7.6	3.63667	9.25333	1.34736	9.21348e-09	3.13787e-07	Up	OsGH3.2 - Probable indole-3-acetic acid-amido synthetase expressed
Os02g0134000	7.62	7.05	11.39	23.83	19.6	22.85	8.68667	22.0933	1.34674	1.48556e-08	4.85327e-07	Up	cytidylyltransferase domain containing protein expressed
Os01g0116901	0.36	0.14	0.35	0.67	0.87	0.62	0.283333	0.72	1.3455	0.00821961	0.0419234	Up	--
Os08g0189700	0.37	1.18	0.95	1.84	2.41	2.09	0.833333	2.11333	1.34255	0.00492931	0.0280228	Up	Cupin domain containing protein expressed
Os02g0649300	13.8	10.28	12.22	32.47	35.47	24.03	12.1	30.6567	1.34119	3.3521e-12	2.17111e-10	Up	homeobox associated leucine zipper putative expressed
Os04g0104900	1.71	1.77	2.24	2.43	6.4	5.66	1.90667	4.83	1.34097	0.000526822	0.00444852	Up	O-methyltransferase putative expressed
Os10g0165300	0.7	0.79	1.21	2.4	2.22	2.21	0.9	2.27667	1.33893	1.05662e-05	0.00016049	Up	cytochrome P450 putative expressed
Os02g0149600	0.77	0.46	0.45	1.15	1.73	1.36	0.56	1.41333	1.3356	0.000167518	0.00170999	Up	ZOS2-03 - C2H2 zinc finger protein expressed
Os09g0378700	0.42	0.45	0.41	0.47	0.97	1.79	0.426667	1.07667	1.33539	0.00973918	0.0481024	Up	armadillo Fbeta-catenin repeat family protein putative expressed
Os04g0301500	1.36	1.5	0.77	4.5	2.53	2.13	1.21	3.05333	1.33538	0.00116999	0.00865169	Up	basic helix-loop-helix family protein putative expressed
Os08g0298700	1.04	1.3	1.45	3.45	2.74	3.35	1.26333	3.18	1.33179	1.73804e-07	4.45226e-06	Up	male sterility protein putative expressed
Os05g0324700	3.64	3.57	4.52	3.66	9.51	16.35	3.91	9.84	1.33149	0.0048401	0.0276056	Up	expressed protein
Os01g0714600	4.88	4.15	7.06	6.78	11.94	21.76	5.36333	13.4933	1.33104	0.000824989	0.00643843	Up	expressed protein
Os07g0592600	4.72	3.46	4.27	12.72	10.25	8.29	4.15	10.42	1.32817	3.86457e-10	1.79123e-08	Up	OsGH3.8 - Probable indole-3-acetic acid-amido synthetase expressed
MSTRG.28097	0.92	0.61	0.65	1.71	1.77	1.99	0.726667	1.82333	1.32721	9.54912e-08	2.60834e-06	Up	--
Os02g0709000	0.48	0.7	0.41	1.02	1.54	1.42	0.53	1.32667	1.32374	0.00240984	0.0157111	Up	ZOS2-16 - C2H2 zinc finger protein expressed
Os08g0335500	1.78	1.17	1.61	3.94	3.76	3.7	1.52	3.8	1.32193	2.27798e-09	8.83318e-08	Up	protein kinase putative expressed
Os07g0586100	2.71	2.05	1.9	5.31	4.74	6.59	2.22	5.54667	1.32106	7.4269e-08	2.08431e-06	Up	GDSL-like lipase Facylhydrolase putative expressed
Os04g0674700	7.14	4.21	8.13	12.12	19.94	16.55	6.49333	16.2033	1.31926	1.60834e-06	3.15123e-05	Up	AMP-binding enzyme putative expressed
Os08g0331000	4.98	4.95	8.31	14.87	15.63	14.98	6.08	15.16	1.31813	1.68771e-06	3.29154e-05	Up	expressed protein
Os01g0730100	0.32	0.31	0.57	0.81	1.12	1.06	0.4	0.996667	1.31711	0.00468652	0.026916	Up	OsFBX22 - F-box domain containing protein expressed
Os04g0107900	3.48	2.77	5.79	12.89	8.03	9.06	4.01333	9.99333	1.31616	0.000189985	0.00190139	Up	heat shock protein putative expressed
Os01g0152000	0.93	0.66	1.41	1.96	2.79	2.72	1	2.49	1.31615	1.83271e-05	0.00025876	Up	receptor kinase putative expressed
Os03g0723400	6.15	4.67	4.04	11.36	7.55	18.09	4.95333	12.3333	1.31609	7.67967e-05	0.000881617	Up	expressed protein
Os03g0198200	3.03	2.2	2.88	5.64	7.16	7.39	2.70333	6.73	1.31587	3.54783e-06	6.27191e-05	Up	--
Os11g0474800	2.12	2.08	2.98	5.21	5.69	6.97	2.39333	5.95667	1.31548	4.68758e-08	1.38255e-06	Up	terpene synthase putative expressed
Os11g0158300	0.61	0.55	0.52	1.59	1.31	1.28	0.56	1.39333	1.31504	1.26231e-06	2.54383e-05	Up	tetratricopeptide-like helical putative expressed
Os01g0803300	2.17	2.67	1.57	6.44	4.6	4.9	2.13667	5.31333	1.31426	1.70631e-06	3.32344e-05	Up	auxin-induced protein 5NG4 putative expressed
Os10g0568100	0.4	0.66	0.67	1.32	1.38	1.58	0.576667	1.42667	1.30684	0.000456409	0.00392774	Up	expressed protein
Os03g0771100	0.76	0.82	0.6	1.99	1.64	1.76	0.726667	1.79667	1.30596	7.61783e-05	0.000876212	Up	MYB family transcription factor putative expressed
Os02g0584200	3	2.59	1.08	4.77	4.46	7.22	2.22333	5.48333	1.30233	0.00264453	0.016925	Up	hypothetical protein
Os02g0744200	16.36	22.52	15.94	42.91	48.81	43.44	18.2733	45.0533	1.30189	2.86397e-16	3.07815e-14	Up	expansin precursor putative expressed
Os03g0570100	1.41	1.41	1.48	2.98	3.88	3.74	1.43333	3.53333	1.30166	7.04097e-09	2.46592e-07	Up	cytochrome P450 putative expressed
Os02g0807000	9.93	15.02	7.77	20.01	24.05	36.59	10.9067	26.8833	1.3015	4.08637e-06	7.03218e-05	Up	calcium-dependent protein kinase isoform AK1 putative expressed
Os07g0480800	10.12	14.55	12.93	28.53	30.88	33.26	12.5333	30.89	1.30137	7.96507e-16	8.14744e-14	Up	glycosyl hydrolases family 16 putative expressed
Os04g0445100	1.45	1.69	1.91	3.66	4.6	4.15	1.68333	4.13667	1.29715	3.33453e-06	5.94086e-05	Up	hsp20 Falpha crystallin family protein putative expressed
Os03g0734100	14.88	13.56	16.41	36.37	31.32	42.47	14.95	36.72	1.29642	1.53582e-12	1.04015e-10	Up	PIII4 - Proteinase inhibitor II family protein precursor expressed
Os05g0522600	15.88	15.82	15	31.46	41.02	42.16	15.5667	38.2133	1.29562	7.53912e-20	1.18958e-17	Up	receptor-like protein kinase 5 precursor putative expressed
Os10g0513900	5.12	4.68	3.86	8.19	12.66	12.66	4.55333	11.17	1.29463	4.42871e-09	1.62189e-07	Up	transposon protein putative unclassified expressed
Os06g0178650	1.46	0.94	1.35	2.46	4.19	2.54	1.25	3.06333	1.29317	0.00789038	0.0406002	Up	iron Fascorbate-dependent oxidoreductase putative expressed
Os03g0759700	0.93	1.37	1.3	1.85	3.67	3.3	1.2	2.94	1.29278	0.000285428	0.00267857	Up	bHelix-loop-helix transcription factor putative expressed
Os02g0300700	28.38	29.64	31.95	77.74	79.41	63.24	29.99	73.4633	1.29254	4.06019e-21	7.48084e-19	Up	eukaryotic translation initiation factor 1A putative expressed
Os07g0635500	1.78	1.27	1.71	2.95	4.94	3.77	1.58667	3.88667	1.29253	4.19221e-06	7.18831e-05	Up	cytochrome P450 72A1 putative expressed
Os09g0509500	1.25	0.58	0.45	1.75	2.39	1.44	0.76	1.86	1.29123	0.00327295	0.0201095	Up	expressed protein
Os01g0851700	28.37	26.49	26.05	60.41	66.82	70.7	26.97	65.9767	1.2906	1.41601e-37	9.13139e-35	Up	alpha-glucan phosphorylast isozyme putative expressed
MSTRG.8612	0.81	0.84	0.51	2.12	1.55	1.61	0.72	1.76	1.28951	5.21645e-05	0.00063165	Up	--
Os03g0439000	0.66	0.55	1.02	1.4	1.61	2.44	0.743333	1.81667	1.28921	0.00495029	0.0280722	Up	expressed protein
Os05g0580500	0.58	0.44	0.5	1.36	1.34	1.01	0.506667	1.23667	1.28735	4.61998e-05	0.00057008	Up	Rad21 F Rec8 like protein putative expressed
Os03g0580200	1.54	1.32	0.77	2.04	2.23	4.58	1.21	2.95	1.28571	0.00785074	0.0404383	Up	expressed protein
Os02g0327500	1.96	1.46	1.93	3.44	4.74	4.85	1.78333	4.34333	1.28423	2.77648e-07	6.84066e-06	Up	DNA binding protein putative expressed
Os05g0432200	1.06	1.45	1.11	2.78	3.2	2.83	1.20667	2.93667	1.28315	0.000371244	0.00332606	Up	GASR6 - Gibberellin-regulated GASA FGAST FSnakin family protein precursor expressed
Os11g0540600	0.25	0.3	0.26	0.63	0.77	0.57	0.27	0.656667	1.2822	0.00773494	0.0399807	Up	plant protein of unknown function domain containing protein expressed
Os04g0316200	2.45	1.83	2.42	4.83	6.1	5.36	2.23333	5.43	1.28175	1.22243e-07	3.24059e-06	Up	cysteine-rich receptor-like protein kinase putative expressed
Os01g0128000	0.92	1.1	1	2.82	2.29	2.23	1.00667	2.44667	1.28123	2.74975e-06	5.05379e-05	Up	MYB family transcription factor putative expressed
Os12g0135051	0.73	0.41	0.77	1.49	1.75	1.4	0.636667	1.54667	1.28055	0.0066549	0.035608	Up	pentatricopeptide putative expressed
Os06g0148700	0.63	0.41	0.5	1.14	1.19	1.41	0.513333	1.24667	1.28011	0.00153178	0.0108188	Up	OsFBX186 - F-box domain containing protein expressed
Os01g0830700	12.15	14.89	15.89	35.99	35.27	32.92	14.31	34.7267	1.27902	9.85526e-21	1.76112e-18	Up	leaf senescence related protein putative expressed
MSTRG.5110	0.57	0.66	0.84	1.78	1.41	1.83	0.69	1.67333	1.27806	6.11579e-05	0.000722496	Up	--
Os07g0150700	20.67	16.06	19.85	40.46	44.61	52.09	18.86	45.72	1.2775	7.49626e-17	8.58567e-15	Up	CAMK_KIN1 FSNF1 FNim1_like.28 - CAMK includes calcium Fcalmodulin depedent protein kinases expressed
Os01g0363900	11.12	10.88	10.26	26.82	29.96	21.36	10.7533	26.0467	1.27631	2.12775e-18	2.80522e-16	Up	exportin 1 putative expressed
Os08g0476900	0.26	0.39	0.44	0.6	1.12	0.92	0.363333	0.88	1.27621	0.00821538	0.041909	Up	patatin putative expressed
Os01g0342750	0.46	0.54	0.57	1.3	1.24	1.26	0.523333	1.26667	1.27523	1.3684e-05	0.000200554	Up	pleiotropic drug resistance protein putative expressed
Os01g0865400	1.99	1.7	2.63	4.92	5.66	4.71	2.10667	5.09667	1.27459	1.66252e-07	4.28843e-06	Up	anthocyanidin 3-O-glucosyltransferase putative expressed
Os06g0215600	3.37	2.37	4.97	5.6	8.82	11.48	3.57	8.63333	1.27399	0.000217034	0.00212983	Up	12-oxophytodienoate reductase putative expressed
Os05g0550800	2.62	1.98	2.18	3.81	6.57	6.01	2.26	5.46333	1.27346	7.34618e-07	1.58948e-05	Up	serine Fthreonine-protein kinase At1g18390 precursor putative expressed
Os01g0584900	4.74	2.88	2.4	5.15	8.42	10.61	3.34	8.06	1.27093	0.000296096	0.00276381	Up	WRKY77 expressed
Os02g0526400	23.61	16.28	19.17	55.11	41.02	46.33	19.6867	47.4867	1.2703	2.92498e-13	2.2305e-11	Up	ERD1 protein chloroplast precursor putative expressed
Os09g0298100	1.33	1.06	1.23	3.62	2.45	2.65	1.20667	2.90667	1.26834	2.05564e-06	3.92903e-05	Up	pyrophosphate--fructose 6-phosphate 1-phosphotransferase subunit alpha putative expressed
Os01g0648000	8.86	7.29	8.85	19.1	20.37	20.74	8.33333	20.07	1.26808	3.31161e-24	8.25509e-22	Up	potassium channel AKT1 putative expressed
MSTRG.7551	1.09	1.17	1.16	2.87	3.13	2.22	1.14	2.74	1.26514	1.22158e-05	0.00018172	Up	PREDICTED: NADPH--cytochrome P450 reductase-like [Oryza brachyantha]
Os04g0518400	7.12	4.89	6.83	10.82	17.14	17.31	6.28	15.09	1.26476	4.10145e-08	1.23019e-06	Up	phenylalanine ammonia-lyase putative expressed
Os05g0595300	27.44	28.59	39.66	80.56	74.52	74.78	31.8967	76.62	1.26432	4.30177e-14	3.64594e-12	Up	CCT motif family protein expressed
Os05g0107900	3.06	3.13	3.46	8.1	9.26	5.82	3.21667	7.72667	1.26428	3.06965e-06	5.53815e-05	Up	drought induced 19 protein putative expressed
Os03g0326200	1.46	1.12	1.36	2.64	2.88	3.94	1.31333	3.15333	1.26364	6.40124e-08	1.82583e-06	Up	phospholipid-transporting ATPase 1 putative expressed
Os11g0142500	15.87	15.28	13.25	30.22	40.22	36.05	14.8	35.4967	1.26209	1.16399e-18	1.57664e-16	Up	2-isopropylmalate synthase B putative expressed
Os07g0118200	1.09	1.42	2.35	4.2	4.29	3.16	1.62	3.88333	1.2613	0.00632603	0.0342	Up	DUF538 domain containing protein putative expressed
Os09g0109600	4.95	2.92	5.06	11.24	9.41	10.34	4.31	10.33	1.26108	6.90554e-06	0.000110608	Up	expressed protein
Os03g0181100	4.59	5.84	7.46	15.22	12.76	14.89	5.96333	14.29	1.26082	2.7515e-08	8.45809e-07	Up	ZIM domain containing protein putative expressed
Os02g0710500	4.09	2.9	2.83	7.8	8.47	7.26	3.27333	7.84333	1.26071	1.05491e-09	4.43243e-08	Up	cysteine-rich receptor-like protein kinase 7 precursor putative expressed
Os09g0316000	1.42	1.47	1.91	4.45	3.76	3.28	1.6	3.83	1.25927	6.58996e-06	0.000106473	Up	2-aminoethanethiol dioxygenase putative expressed
Os12g0268000	9.4	8.82	10.33	21.32	25.89	21.13	9.51667	22.78	1.25924	1.9865e-18	2.63069e-16	Up	cytochrome P450 71A1 putative expressed
Os01g0609900	4.33	4	4.9	8.54	9.99	13.13	4.41	10.5533	1.25885	1.94931e-11	1.12099e-09	Up	pleiotropic drug resistance protein putative expressed
Os03g0230300	6.36	5.15	6.23	13.68	15.66	13.09	5.91333	14.1433	1.25808	8.35108e-16	8.51294e-14	Up	ATP8 putative expressed
Os10g0569400	187.65	146.35	215.36	494.11	490.09	329.29	183.12	437.83	1.25758	4.39828e-10	2.00724e-08	Up	RALFL26 - Rapid ALkalinization Factor RALF family protein precursor expressed
Os03g0405900	18.72	17.68	22.47	43.73	58.65	38.29	19.6233	46.89	1.25671	1.73392e-11	1.01051e-09	Up	PDI putative expressed
Os01g0719200	1.52	1.19	1.01	2.84	3.41	2.63	1.24	2.96	1.25526	0.00849836	0.0430785	Up	expressed protein
Os10g0559500	1.75	1.3	1.34	3.23	3.43	3.81	1.46333	3.49	1.25397	5.959e-08	1.71619e-06	Up	flavonol synthase Fflavanone 3-hydroxylase putative expressed
Os07g0224900	2.87	7.31	7.82	14.33	16.24	12.34	6	14.3033	1.25332	0.000143356	0.00150319	Up	WD domain G-beta repeat domain containing protein expressed
Os10g0456000	5.47	8.08	8.24	8.91	12.12	30.81	7.26333	17.28	1.2504	0.0021112	0.0141242	Up	--
Os09g0482800	2.85	2.38	2.53	7.87	5.44	5.15	2.58667	6.15333	1.25027	2.48803e-05	0.00033502	Up	EF hand family protein expressed
Os01g0615050	9.57	3.85	6.35	14.66	13.47	18.88	6.59	15.67	1.24965	0.000161073	0.00165058	Up	Proteinase inhibitor I13, potato inhibitor I family protein. (Os01t0615050-00)
Os03g0802600	1.21	0.9	0.52	1.76	2.83	1.66	0.876667	2.08333	1.24879	0.00162117	0.0113581	Up	ATPase putative expressed
Os01g0693300	2.49	2.31	2.42	4.76	5.24	7.15	2.40667	5.71667	1.24814	8.52502e-09	2.92692e-07	Up	lipid phosphatase protein putative expressed
Os06g0553100	2.65	2.93	3.07	8.78	5.54	6.18	2.88333	6.83333	1.24485	1.0181e-05	0.000155674	Up	HSF-type DNA-binding domain containing protein expressed
Os09g0472900	16.25	15.19	24.98	28.48	69.31	35.75	18.8067	44.5133	1.24299	0.000181588	0.00182907	Up	beta-expansin precursor putative expressed
Os01g0170600	10.85	9.69	10.75	25.9	22.89	25.24	10.43	24.6767	1.24241	3.06613e-26	9.00532e-24	Up	universal stress protein domain containing protein putative expressed
Os01g0374600	1.42	1.4	2.9	2.4	4.76	6.37	1.90667	4.51	1.24207	0.00360577	0.0217478	Up	laccase precursor protein putative expressed
Os06g0215100	0.81	1.28	1.17	2.14	2.64	2.93	1.08667	2.57	1.24186	3.46536e-05	0.000443088	Up	DUF1645 domain containing protein putative expressed
Os10g0118800	2.27	1.61	1.47	3.8	3.39	5.46	1.78333	4.21667	1.24153	0.00107597	0.00807221	Up	cytochrome b561 putative expressed
Os01g0699400	0.61	0.47	0.79	1.38	1.21	1.83	0.623333	1.47333	1.24101	0.00215634	0.0143711	Up	STE_MEKK_ste11_MAP3K.5 - STE kinases include homologs to sterile 7 sterile 11 and sterile 20 from yeast expressed
Os03g0264400	24.74	18.88	22.87	41.99	53.9	61.18	22.1633	52.3567	1.2402	9.60063e-13	6.71682e-11	Up	anthranilate synthase component I-1 chloroplast precursor putative expressed
Os05g0211100	1.04	0.86	0.48	1.27	2.09	2.25	0.793333	1.87	1.23704	0.00239706	0.0156415	Up	cytochrome P450 51 putative expressed
Os05g0127500	5.95	5.92	7.78	19.35	14.19	12.76	6.55	15.4333	1.23648	9.81902e-09	3.32123e-07	Up	flavonol synthase Fflavanone 3-hydroxylase putative expressed
Os04g0516600	39.86	34.74	32.69	100.22	74.38	78.03	35.7633	84.21	1.23551	2.63301e-16	2.85057e-14	Up	L-allo-threonine aldolase putative expressed
Os03g0109000	7.99	5.81	8.16	15.89	20.46	15.35	7.32	17.2333	1.23529	3.30581e-09	1.24131e-07	Up	no apical meristem protein putative expressed
Os06g0232700	0.55	0.43	0.69	1.57	1.06	1.3	0.556667	1.31	1.23468	0.000354084	0.00320426	Up	transposon protein putative unclassified expressed
Os01g0550800	1.41	0.83	1.13	1.21	2.49	4.23	1.12333	2.64333	1.23457	0.00909024	0.0454664	Up	carboxyl-terminal peptidase putative expressed
Os09g0456800	17.8	13.21	15.81	36.33	39.82	33.97	15.6067	36.7067	1.23388	1.19465e-16	1.32981e-14	Up	CPuORF39 - conserved peptide uORF-containing transcript expressed
Os07g0643800	6.92	4.89	9.68	16.92	16.78	16.82	7.16333	16.84	1.23319	1.13258e-06	2.30588e-05	Up	expressed protein
Os01g0945100	2.15	0.76	1.47	2.03	3.08	5.18	1.46	3.43	1.23224	0.00987415	0.0485666	Up	amino acid permease family protein putative expressed
Os01g0246700	7.6	6.21	5.63	11.52	16.16	17.99	6.48	15.2233	1.23222	5.70064e-09	2.03739e-07	Up	WRKY1 expressed
Os04g0459700	14.07	8.47	9.97	24.47	27.18	24.67	10.8367	25.44	1.23118	1.81074e-09	7.21958e-08	Up	NAP domain containing protein putative expressed
Os09g0532000	24.91	23.72	22.84	56.63	52.05	58.89	23.8233	55.8567	1.22935	7.86225e-34	4.09168e-31	Up	senescence-inducible chloroplast stay-green protein 1 putative expressed
Os05g0530400	3.03	2.39	3.91	5.8	8.36	7.69	3.11	7.28333	1.22768	6.86771e-07	1.50017e-05	Up	HSF-type DNA-binding domain containing protein expressed
Os04g0108101	3.05	2.78	6.27	11.8	8.95	7.58	4.03333	9.44333	1.22732	0.00279096	0.0176829	Up	--
Os07g0550500	2.47	2.22	2.78	4.85	7.18	5.45	2.49	5.82667	1.22653	5.06354e-09	1.83177e-07	Up	serine Fthreonine-protein kinase receptor precursor putative expressed
Os01g0891400	0.98	0.78	0.9	2.7	1.7	1.82	0.886667	2.07333	1.22549	0.000560754	0.00468702	Up	exosome complex exonuclease RRP40 putative expressed
Os05g0149400	70.85	57.88	74.62	133.86	142.67	198.01	67.7833	158.18	1.22256	9.77314e-12	5.94079e-10	Up	1-aminocyclopropane-1-carboxylate oxidase putative expressed
Os05g0393700	6.52	7.11	6.8	16.34	14.55	16.77	6.81	15.8867	1.22209	1.76644e-24	4.59646e-22	Up	Alpha amylase catalytic domain containing protein expressed
Os01g0370200	1.1	1.15	0.49	2.42	2.48	1.49	0.913333	2.13	1.22164	0.0092724	0.0462513	Up	glutathione S-transferase putative expressed
Os01g0761500	0.41	0.42	0.21	1.08	0.6	0.74	0.346667	0.806667	1.21842	0.00977243	0.0482104	Up	peptide transporter PTR2 putative expressed
Os08g0320400	10.91	11.59	10.12	23.93	22.3	29.52	10.8733	25.25	1.21549	3.51392e-16	3.7095e-14	Up	indole-3-glycerol phosphate synthase chloroplast precursor putative expressed
Os01g0838300	1.01	2.05	2.42	4.92	5.08	2.72	1.82667	4.24	1.21485	0.00909424	0.0454697	Up	--
Os03g0195100	4.27	2.71	4.29	10.5	9.46	6.19	3.75667	8.71667	1.21432	1.92189e-05	0.000269046	Up	aminotransferase classes I and II domain containing protein expressed
Os02g0582800	2.82	1.75	2.7	5.64	5.26	5.96	2.42333	5.62	1.21358	7.27633e-06	0.000115611	Up	expressed protein
Os01g0548600	1.65	0.73	0.89	2.89	2.53	2.16	1.09	2.52667	1.21291	0.00536526	0.0299671	Up	TKL_IRAK_DUF26-lf.2 - DUF26 kinases have homology to DUF26 containing loci expressed
Os02g0771400	1.99	2.61	2.04	5.18	4.66	5.55	2.21333	5.13	1.21274	3.12982e-05	0.000407922	Up	tyrosine phosphatase family protein putative expressed
Os10g0529500	5.98	4.37	5.45	10.15	13.22	13.21	5.26667	12.1933	1.21113	2.46109e-08	7.66062e-07	Up	glutathione S-transferase GSTU6 putative expressed
Os07g0537250	1.55	1.4	1.32	2.98	3.44	3.46	1.42333	3.29333	1.21027	8.00803e-10	3.43778e-08	Up	--
Os04g0288500	5.32	4.43	6.63	12.16	13.53	12.19	5.46	12.6267	1.2095	2.47384e-11	1.39513e-09	Up	protein kinase putative expressed
Os03g0740833	1.39	1.41	1.34	3.84	3.35	2.38	1.38	3.19	1.20889	2.16665e-07	5.44212e-06	Up	--
Os12g0555500	178.78	90.95	218.54	304.86	445.1	376.54	162.757	375.5	1.2061	1.81671e-05	0.000256868	Up	pathogenesis-related Bet v I family protein putative expressed
Os02g0575700	16.94	15.64	14.06	28.86	35.17	43.5	15.5467	35.8433	1.2051	7.04495e-13	5.0357e-11	Up	CPuORF19 - conserved peptide uORF-containing transcript expressed
Os09g0502500	1.28	0.79	0.78	2.02	2.26	2.29	0.95	2.19	1.20493	0.000386417	0.00343399	Up	alcohol dehydrogenase GroES-like domain containing protein expressed
Os02g0733500	0.63	1.29	0.87	2.22	2.17	2.04	0.93	2.14333	1.20455	0.00224458	0.0148198	Up	OsCML20 - Calmodulin-related calcium sensor protein expressed
Os11g0482200	1.4	1.03	2.39	4.51	3.11	3.48	1.60667	3.7	1.20345	0.00646104	0.0347967	Up	resistance-gene-interacting protein putative expressed
Os05g0135450	1.51	1.59	1.41	2.88	2.58	4.91	1.50333	3.45667	1.20122	0.00760016	0.0394008	Up	--
Os09g0454900	1.03	1.14	1.54	3.11	2.73	2.69	1.23667	2.84333	1.20113	1.80278e-07	4.58642e-06	Up	D-mannose binding lectin family protein expressed
Os06g0229400	2.41	1.84	3.19	6.54	5.9	4.63	2.48	5.69	1.19809	3.23167e-05	0.000418073	Up	GDSL-like lipase Facylhydrolase putative expressed
Os01g0558100	2.56	2.33	2.63	5.59	4.32	7.34	2.50667	5.75	1.19779	2.24484e-05	0.00030673	Up	glutathione S-transferase putative expressed
Os01g0794800	2.67	1.48	2.48	4.28	4.78	6.12	2.21	5.06	1.19509	1.76525e-05	0.000251261	Up	OsSub6 - Putative Subtilisin homologue expressed
Os05g0361500	0.69	1.16	1.32	2.63	2.52	2.1	1.05667	2.41667	1.1935	0.000157362	0.00162252	Up	pectinesterase putative expressed
Os02g0266900	0.48	0.38	0.36	0.95	0.94	0.9	0.406667	0.93	1.19338	0.00395081	0.0234675	Up	expressed protein
Os08g0189500	1.58	1.12	1.94	2.18	3.01	5.42	1.54667	3.53667	1.19323	0.00608661	0.0331717	Up	Cupin domain containing protein expressed
Os02g0740700	7.84	5.45	5.16	8.63	12.61	20.94	6.15	14.06	1.19294	0.000213931	0.00210413	Up	metalloendoproteinase 1 precursor putative expressed
Os02g0682300	3.13	3.33	3.34	4.45	5.64	12.31	3.26667	7.46667	1.19265	0.00178917	0.0123371	Up	zinc finger C3HC4 type domain containing protein expressed
Os11g0138400	1.25	0.79	2.17	3.29	3.23	3.1	1.40333	3.20667	1.19222	0.00461805	0.0266258	Up	retrotransposon protein putative unclassified expressed
Os08g0559501	1.22	0.5	1.02	2.2	1.9	2.16	0.913333	2.08667	1.19199	0.00825901	0.0420882	Up	peptidyl-prolyl cis-trans isomerase putative expressed
Os06g0145200	0.27	0.42	0.58	0.79	0.87	1.24	0.423333	0.966667	1.19122	0.00583108	0.0320261	Up	transferase family protein putative expressed
Os04g0462400	0.89	1.33	0.85	1.38	2.69	2.94	1.02333	2.33667	1.19118	0.00180097	0.0124011	Up	expressed protein
Os05g0547600	9.9	8.88	6.4	21.55	19.39	16.46	8.39333	19.1333	1.18877	5.04293e-09	1.82877e-07	Up	expressed protein
Os02g0564700	1.23	1.39	1.02	2.49	2.26	3.54	1.21333	2.76333	1.18743	2.11193e-05	0.000290981	Up	PTF1 putative expressed
Os02g0632800	2.33	1.8	2.14	5.97	4.23	4.04	2.09	4.74667	1.18341	6.6339e-08	1.88143e-06	Up	OsWAK14 - OsWAK receptor-like protein kinase expressed
Os10g0344000	4.98	3.31	2.73	6.61	9.68	8.72	3.67333	8.33667	1.18238	7.24054e-06	0.000115104	Up	MATE efflux family protein putative expressed
Os09g0396900	5.77	4.29	3.23	9.98	8.3	11.85	4.43	10.0433	1.18086	6.3459e-06	0.000102922	Up	integral membrane protein putative expressed
Os05g0434800	3.34	2.48	3.46	9.69	6.1	5.22	3.09333	7.00333	1.17888	0.00065008	0.00528908	Up	expressed protein
Os10g0154700	7.82	9.27	11.41	24.36	20.25	19.9	9.5	21.5033	1.17856	1.61034e-09	6.49919e-08	Up	peptidyl-prolyl cis-trans isomerase putative expressed
MSTRG.15138	4.04	4.51	4.89	7.22	7.38	15.78	4.48	10.1267	1.17659	0.00022431	0.00218735	Up	lysM domain containing protein [Zea mays]
Os02g0162600	6.4	7.39	7.11	22.33	15.55	9.36	6.96667	15.7467	1.17651	0.000113071	0.00122663	Up	--
MSTRG.9124	1.53	1.12	2.5	2.06	5.54	4.04	1.71667	3.88	1.17645	0.00781664	0.0403117	Up	PREDICTED: WRKY transcription factor SUSIBA2-like isoform X3 [Oryza sativa Japonica Group]
Os10g0580400	36.83	24.77	29.83	61.05	79.41	66.06	30.4767	68.84	1.17554	1.33522e-11	7.87437e-10	Up	urea active transporter putative expressed
Os06g0191900	1	0.77	0.84	1.9	2.16	1.83	0.87	1.96333	1.17422	1.99407e-06	3.82613e-05	Up	serine threonine kinase putative expressed
Os01g0297200	2.76	1.74	3.94	5.59	6.86	6.56	2.81333	6.33667	1.17144	9.47517e-05	0.00105291	Up	ATPase putative expressed
Os03g0190400	0.68	1.11	0.63	1.35	2.07	2.03	0.806667	1.81667	1.17125	0.00047906	0.00409889	Up	--
Os01g0848900	2.75	2.3	3.23	4.98	6.48	7.16	2.76	6.20667	1.16915	2.10793e-06	4.01087e-05	Up	expressed protein
Os10g0189100	51.26	62.89	60.07	121.1	119.26	151.29	58.0733	130.55	1.16865	3.34628e-17	3.95475e-15	Up	phosphoglucomutase putative expressed
Os05g0243100	1.77	1.19	0.96	3	2.84	2.97	1.30667	2.93667	1.16829	0.000107311	0.00117075	Up	expressed protein
Os04g0372700	14.95	15.92	16.97	37.68	33.69	36.12	15.9467	35.83	1.16791	6.0609e-17	7.02307e-15	Up	dehydrogenase putative expressed
Os02g0738200	0.83	1.11	0.87	1.32	2.13	2.86	0.936667	2.10333	1.16707	0.00188908	0.012897	Up	immediate-early fungal elicitor protein CMPG1 putative expressed
Os11g0582000	5.53	3.69	5.09	8.75	10.66	12.71	4.77	10.7067	1.16645	7.95306e-06	0.000124825	Up	MTN26L5 - MtN26 family protein precursor expressed
Os05g0177000	1.32	0.78	1.24	2.55	3.14	1.8	1.11333	2.49667	1.16512	0.000794464	0.00624953	Up	OsFBX163 - F-box domain containing protein expressed
Os12g0478200	6.7	6	8.65	16.83	13.58	17.42	7.11667	15.9433	1.16368	6.69716e-07	1.4651e-05	Up	GRAM domain containing protein expressed
Os04g0409200	62.08	59.61	56.2	142.76	125.18	130.17	59.2967	132.703	1.16218	8.04137e-33	3.97565e-30	Up	1 4-alpha-glucan-branching enzyme 2 chloroplast precursor putative expressed
Os07g0593400	2.39	1.94	1.84	5.05	4.46	4.29	2.05667	4.6	1.16133	9.96631e-06	0.000152786	Up	vesicle transport protein GOT1B putative expressed
Os12g0570400	0.52	0.62	1.1	1.45	1.66	1.9	0.746667	1.67	1.16131	0.00955368	0.0473676	Up	expressed protein
Os10g0530900	47.85	35.52	55.73	84.1	121.27	105.64	46.3667	103.67	1.16084	1.38931e-08	4.57918e-07	Up	glutathione S-transferase putative expressed
Os03g0197175	58.12	45.15	52.61	106.77	113.6	128.08	51.96	116.15	1.16052	1.19737e-17	1.47381e-15	Up	--
Os01g0740700	0.82	1.09	1.11	1.93	2.27	2.55	1.00667	2.25	1.16034	9.32686e-06	0.00014395	Up	--
Os04g0631600	6.05	6.41	6.58	17.52	14.34	10.67	6.34667	14.1767	1.15945	9.29081e-09	3.16058e-07	Up	ethylene-responsive protein related putative expressed
Os06g0697200	1.9	1.47	1.73	3.89	3.56	3.94	1.7	3.79667	1.1592	1.60002e-08	5.18154e-07	Up	DEAD-box ATP-dependent RNA helicase putative expressed
Os12g0578600	0.67	0.67	0.42	1.38	1.34	1.21	0.586667	1.31	1.15895	0.000432827	0.00376742	Up	ZOS12-06 - C2H2 zinc finger protein expressed
Os12g0148600	1.69	0.93	2.01	3.11	3.86	3.34	1.54333	3.43667	1.15496	0.000366053	0.0032865	Up	expressed protein
Os12g0175400	3.42	2.87	4.39	4.93	8.47	10.37	3.56	7.92333	1.15423	0.000406812	0.00358748	Up	MYB family transcription factor putative expressed
Os06g0274800	11.72	11.99	13.61	29.25	27.83	25.97	12.44	27.6833	1.15403	1.31476e-18	1.77278e-16	Up	peroxidase precursor putative expressed
Os12g0625000	85.72	73.77	88.83	182.09	174.22	196.03	82.7733	184.113	1.15336	1.74237e-23	4.03794e-21	Up	cysteine synthase putative expressed
Os11g0298000	5.23	4.46	2.5	6.59	7.69	12.83	4.06333	9.03667	1.15313	0.000564469	0.00471143	Up	transmembrane amino acid transporter protein putative expressed
Os05g0118900	2.32	2.84	2.4	6.94	7.17	2.7	2.52	5.60333	1.15286	0.00201123	0.0135637	Up	expressed protein
Os01g0699500	2.46	2.75	1.57	3	5.27	6.78	2.26	5.01667	1.15041	0.00125611	0.00918073	Up	STE_MEKK_ste11_MAP3K.6 - STE kinases include homologs to sterile 7 sterile 11 and sterile 20 from yeast expressed
MSTRG.8921	0.84	0.7	0.83	2	1.83	1.42	0.79	1.75	1.14743	3.57691e-06	6.31324e-05	Up	receptor kinase TRKa [Oryza sativa Indica Group]
Os10g0524300	2.7	2.57	3.03	7.7	6.21	4.45	2.76667	6.12	1.14538	6.66341e-05	0.000776369	Up	lysM domain containing protein putative expressed
Os11g0210500	1.8	1.58	3.07	4.25	5.54	4.46	2.15	4.75	1.14359	0.000359971	0.00324128	Up	dehydrogenase putative expressed锛孫sADH2
Os03g0111400	10.24	6.99	12.1	21.57	21.42	21.8	9.77667	21.5967	1.14339	1.00529e-06	2.08392e-05	Up	heavy-metal-associated domain-containing protein putative expressed
Os11g0267400	0.62	0.6	0.44	1.25	1.16	1.25	0.553333	1.22	1.14066	1.83524e-05	0.000258994	Up	ATP-dependent Clp protease ATP-binding subunit clpA homolog CD4B chloroplast precursor putative expressed
Os01g0820000	2.4	2.83	2.74	5.22	6.84	5.51	2.65667	5.85667	1.14046	3.29503e-08	1.00195e-06	Up	cytochrome P450 putative expressed
Os03g0793900	3.91	2.98	3.22	8.9	7.43	5.95	3.37	7.42667	1.13997	4.62931e-05	0.000570993	Up	LTPL99 - Protease inhibitor Fseed storage FLTP family protein precursor expressed
Os04g0136700	28.12	27.76	33.86	64.39	62.36	70.79	29.9133	65.8467	1.13832	1.06716e-17	1.33009e-15	Up	CBS domain containing membrane protein putative expressed
Os03g0200200	3.56	4.29	4.06	6.15	10.38	9.67	3.97	8.73333	1.13739	1.12358e-05	0.000169445	Up	expressed protein
Os03g0348200	91.94	104.18	95.6	209.51	224.36	205.76	97.24	213.21	1.13265	5.94341e-35	3.26492e-32	Up	terpene synthase putative expressed
Os07g0131375	1.53	0.94	1.27	2.03	3.26	2.91	1.24667	2.73333	1.13259	0.000288969	0.00270393	Up	lectin-like receptor kinase 7 putative expressed
Os10g0329900	0.86	0.74	1.33	1.42	1.94	3.06	0.976667	2.14	1.13167	0.00983053	0.0484326	Up	Similar to Protein kinase domain containing protein. (Os10t0329900-00)
Os07g0274700	26.55	17.54	30.5	56.16	51.59	55.51	24.8633	54.42	1.13012	1.31057e-07	3.45878e-06	Up	B12D protein putative expressed
Os09g0571200	28.68	17.25	26.31	44.45	53.08	60.33	24.08	52.62	1.12778	1.37411e-07	3.60403e-06	Up	C2 domain containing protein putative expressed
Os07g0677200	191.89	175.21	196.54	405.33	456.68	369.64	187.88	410.55	1.12775	7.66416e-22	1.47666e-19	Up	peroxidase precursor putative expressed
Os06g0599200	8.79	6.92	10.51	16.53	17.56	23.18	8.74	19.09	1.12711	8.72368e-08	2.41174e-06	Up	cytochrome P450 putative expressed
Os08g0168000	7.26	5.33	8.71	11.97	21.91	12.58	7.1	15.4867	1.12514	6.31971e-05	0.000741859	Up	terpene synthase putative expressed
Os10g0534600	2.1	1.18	1.7	4.04	2.53	4.29	1.66	3.62	1.12481	0.000139734	0.00146988	Up	--
Os04g0111250	1.68	2.1	1.93	3.12	3.09	6.21	1.90333	4.14	1.1211	0.00125417	0.00917249	Up	--
Os04g0209200	4.05	3.06	4.5	7.49	9.27	8.49	3.87	8.41667	1.12092	1.01424e-09	4.27363e-08	Up	multidrug resistance-associated protein putative expressed
Os08g0162033	4.33	3.08	3.8	6.95	9.49	7.89	3.73667	8.11	1.11795	1.57119e-05	0.000226435	Up	ribosomal protein L13 putative expressed
Os07g0182100	19.59	22.13	15.15	26.99	32.53	63.9	18.9567	41.14	1.11784	0.000175721	0.00178147	Up	indole-3-glycerol phosphate lyase chloroplast precursor putative expressed
Os08g0508800	6.01	3.29	4.08	8.78	8.77	11.48	4.46	9.67667	1.11747	2.64925e-06	4.89337e-05	Up	lipoxygenase chloroplast precursor putative expressed
Os08g0141400	11.92	11.21	12.17	27.96	25.28	23.22	11.7667	25.4867	1.11504	2.06086e-20	3.55427e-18	Up	external NADH-ubiquinone oxidoreductase 1 mitochondrial precursor putative expressed
Os07g0151800	8.56	5.94	7.58	14.01	18.37	15.37	7.36	15.9167	1.11276	3.32048e-07	7.97559e-06	Up	expressed protein
Os09g0470701	2.23	3.1	1.44	3.34	6.72	4.58	2.25667	4.88	1.11269	0.00493327	0.0280399	Up	--
MSTRG.13241	1.03	1.22	1.2	2.17	1.95	3.34	1.15	2.48667	1.11258	0.00729352	0.0382185	Up	--
Os08g0205900	22.69	23.93	24.71	51.98	47.07	55.15	23.7767	51.4	1.11222	9.10501e-25	2.45537e-22	Up	aminotransferase putative expressed
Os08g0398300	1.13	1.01	1.22	2.04	1.9	3.32	1.12	2.42	1.11151	6.30024e-05	0.00074016	Up	ABC transporter ATP-binding protein putative expressed
Os03g0183000	11.38	9.6	9.85	19.81	18.99	27.81	10.2767	22.2033	1.1114	4.02591e-09	1.48169e-07	Up	AP2 domain containing protein expressed
Os03g0571700	5.61	6.27	6.62	10.89	12.04	17.03	6.16667	13.32	1.11103	1.70945e-07	4.40184e-06	Up	MATE efflux family protein putative expressed
Os03g0829200	2.09	1.46	1.59	3.7	3.95	3.45	1.71333	3.7	1.11072	7.87326e-07	1.68874e-05	Up	hydrolase alpha Fbeta fold family domain containing protein expressed
Os11g0149300	1.65	1.71	1.77	3.53	4.63	2.91	1.71	3.69	1.10962	3.0733e-05	0.0004025	Up	expressed protein
Os05g0519700	15.46	14.56	18.27	37.17	30.94	35.97	16.0967	34.6933	1.1079	4.70419e-15	4.4583e-13	Up	heat shock protein 101 putative expressed
Os12g0448900	10.23	6.95	10.38	20.39	19.47	19.47	9.18667	19.7767	1.10619	5.71726e-10	2.52001e-08	Up	alpha-DOX2 putative expressed
Os01g0787000	1.95	1.76	2.03	4.19	3.78	4.37	1.91333	4.11333	1.10422	2.35331e-08	7.38716e-07	Up	peroxidase precursor putative expressed
Os04g0580866	1.9	1.92	1.32	4.27	2.69	4.09	1.71333	3.68333	1.10421	0.00563188	0.0311803	Up	zinc finger C3HC4 type domain containing protein expressed
Os10g0491000	68.72	40.75	67.18	84.1	174.75	120.77	58.8833	126.54	1.10366	7.2587e-05	0.000838155	Up	secretory protein putative expressed
Os01g0826000	4.46	6.57	6.32	14.42	12.06	10.8	5.78333	12.4267	1.10347	3.2615e-05	0.000421014	Up	heavy metal-associated domain containing protein expressed
Os02g0212500	2.62	2.06	2.91	4.65	5.4	6.24	2.53	5.43	1.10181	0.000165422	0.0016918	Up	expressed protein
Os08g0330900	3.06	1.7	1.48	4.57	5.28	3.53	2.08	4.46	1.10046	0.00385622	0.0229931	Up	OsFBX286 - F-box domain containing protein expressed
Os02g0161100	0.62	0.67	0.59	1.47	1.23	1.33	0.626667	1.34333	1.10005	8.95727e-06	0.000138953	Up	formin putative expressed
Os03g0571800	3.56	2.53	5.32	7.09	8.1	9.25	3.80333	8.14667	1.09895	0.00111368	0.00831102	Up	--
Os10g0578700	5.29	5.37	5.45	11.13	13.33	10	5.37	11.4867	1.09697	5.17641e-11	2.75185e-09	Up	--
Os04g0453500	2.48	2.34	2.79	5.86	5.67	4.74	2.53667	5.42333	1.09625	1.15075e-10	5.79555e-09	Up	retrotransposon protein putative unclassified expressed
Os02g0519950	0.57	0.5	0.31	1.03	1.03	0.89	0.46	0.983333	1.09605	0.00157383	0.0110683	Up	--
Os06g0218900	0.96	0.95	1.18	2.19	2.25	2.16	1.03	2.2	1.09486	0.000176581	0.00178878	Up	LMBR1 integral membrane protein putative expressed
MSTRG.9803	0.84	0.49	0.82	1.16	1.71	1.72	0.716667	1.53	1.09416	0.00122877	0.0090023	Up	PREDICTED: cysteine-rich receptor-like protein kinase 10 [Oryza sativa Japonica Group]
Os02g0237100	0.96	0.98	1.34	3.12	2.11	1.77	1.09333	2.33333	1.09366	0.00169828	0.011798	Up	spermidine synthase putative expressed
Os01g0945200	1.5	1.12	2.53	2.89	3.82	4.27	1.71667	3.66	1.09223	0.00213927	0.0142833	Up	amino acid permease family protein putative expressed
Os03g0664800	1.81	1.71	3.01	3.25	5.93	4.74	2.17667	4.64	1.092	0.00349582	0.0211892	Up	acetyltransferase GNAT family putative expressed
Os04g0103500	1.67	2.42	2	5.01	3.98	3.99	2.03	4.32667	1.09178	2.07026e-07	5.22213e-06	Up	serine Fthreonine-protein kinase receptor precursor putative expressed
Os03g0231600	19.43	14.17	11.97	29.78	34.62	32.6	15.19	32.3333	1.0899	4.63922e-09	1.69272e-07	Up	aminotransferase domain containing protein putative expressed
Os12g0132400	4.76	4.49	3.35	8.25	10.93	7.63	4.2	8.93667	1.08935	2.26524e-05	0.000308658	Up	WD domain G-beta repeat domain containing protein expressed
Os02g0612200	1.59	1.83	2.4	3.22	4.05	5.11	1.94	4.12667	1.08892	9.6197e-05	0.00106636	Up	expressed protein
Os05g0486100	2.78	2.47	2.86	3.83	5.77	7.64	2.70333	5.74667	1.08799	3.09675e-05	0.000404857	Up	leucine-rich repeat family protein putative expressed
Os07g0686800	1.56	0.76	1.66	2	2.97	3.49	1.32667	2.82	1.08789	0.00588821	0.0322894	Up	tyrosine protein kinase domain containing protein putative expressed
Os01g0138400	1.98	1.13	2.09	1.9	3.76	5.39	1.73333	3.68333	1.08746	0.00664271	0.0355557	Up	Ser FThr protein kinase putative expressed
Os05g0573300	17.32	17.2	18.39	40.09	35.49	36.83	17.6367	37.47	1.08716	1.64445e-26	5.02897e-24	Up	CTP synthase putative expressed
Os03g0197200	19.96	13	15.93	27.8	34.39	41.63	16.2967	34.6067	1.08647	3.14287e-07	7.59822e-06	Up	transporter family protein putative expressed
Os07g0604300	1.29	0.88	1.15	2.61	2.38	2.06	1.10667	2.35	1.08644	0.000132816	0.00141011	Up	COBRA putative expressed
Os10g0509800	4.02	3.52	2.92	7.87	7.37	6.97	3.48667	7.40333	1.08633	5.14485e-06	8.60298e-05	Up	hydroxyproline-rich glycoprotein DZ-HRGP putative expressed
Os12g0517100	0.63	0.67	0.51	1.5	1.24	1.1	0.603333	1.28	1.08512	0.000622669	0.00511375	Up	OsFBL60 - F-box domain and LRR containing protein expressed
Os08g0531000	44.02	27.6	34.77	75.42	79.32	70.95	35.4633	75.23	1.08498	4.9321e-10	2.20908e-08	Up	nucleotide pyrophosphatase Fphosphodiesterase putative expressed
Os01g0916000	1.19	0.86	1.19	2.11	2.88	1.88	1.08	2.29	1.08432	0.00109231	0.00817621	Up	RNA-binding protein FUS putative expressed
Os03g0107800	51.87	51.95	58.9	125.78	109.64	109.58	54.24	115	1.0842	1.11293e-18	1.51441e-16	Up	dual specificity protein phosphatase putative expressed
Os02g0314600	3.25	2.46	3.37	3.65	6.14	9.46	3.02667	6.41667	1.08409	0.00131321	0.00951982	Up	aspartic proteinase nepenthesin precursor putative expressed
Os07g0121800	6.04	5.84	5.4	11.69	12.77	12.15	5.76	12.2033	1.08313	7.53129e-18	9.54736e-16	Up	expressed protein
Os11g0135400	15.69	9.17	9.4	22.73	29.99	19.8	11.42	24.1733	1.08185	1.7713e-05	0.000251767	Up	60S acidic ribosomal protein P0 putative expressed
Os05g0373900	1.86	1.48	2.06	4.72	3.1	3.61	1.8	3.81	1.08179	3.08807e-05	0.0004039	Up	eukaryotic peptide chain release factor subunit 1-1 putative expressed
Os06g0252300	20.91	19.08	19.02	37.11	45.38	42.35	19.67	41.6133	1.08105	2.77088e-19	4.15128e-17	Up	NF-X1-type zinc finger protein putative expressed
Os02g0720500	4.54	3.49	3.2	6.69	9.16	7.9	3.74333	7.91667	1.08057	3.85746e-06	6.71254e-05	Up	aspartic proteinase nepenthesin-2 precursor putative expressed
Os02g0241100	4.22	4.13	4.08	7.88	9.39	9.01	4.14333	8.76	1.08014	3.34062e-15	3.22789e-13	Up	receptor-like kinase putative expressed
Os01g0626400	2.01	2.11	2.27	5.07	4.26	4.17	2.13	4.5	1.07907	3.6813e-06	6.46932e-05	Up	WRKY11 expressed
Os02g0256200	1.92	2.49	1.13	4.11	3.55	4.04	1.84667	3.9	1.07855	0.000643571	0.00524475	Up	expressed protein
Os08g0368000	1.96	1.64	1.36	3.22	4.41	2.83	1.65333	3.48667	1.07647	2.48306e-05	0.000334503	Up	coatomer subunit delta putative expressed
Os02g0540700	1.75	1.75	2.46	2.58	3.71	6.27	1.98667	4.18667	1.07545	0.00348997	0.0211581	Up	U-box domain containing protein expressed
Os02g0740400	2.07	1.46	2.35	5.92	3.59	2.88	1.96	4.13	1.07529	0.00288597	0.0181838	Up	GDSL-like lipase Facylhydrolase putative expressed
Os08g0173600	7.87	6.8	8.49	18.72	16.58	13.37	7.72	16.2233	1.0714	9.75849e-07	2.02999e-05	Up	expressed protein
Os07g0584200	0.35	0.42	0.52	0.85	1.15	0.71	0.43	0.903333	1.07092	0.00682307	0.0363114	Up	BTBN16 - Bric-a-Brac Tramtrack Broad Complex BTB domain with non-phototropic hypocotyl 3 NPH3 domain expressed
Os01g0881900	25.28	21.43	23.14	46.96	48.79	50.92	23.2833	48.89	1.07024	6.73756e-24	1.6118e-21	Up	F-box FLRR-repeat protein 2 putative expressed
Os12g0270900	0.99	0.86	0.77	1.89	2.13	1.48	0.873333	1.83333	1.06986	0.000990562	0.00752279	Up	flavonol sulfotransferase putative expressed
Os06g0141100	2.3	1.85	3.09	3.85	5.71	5.62	2.41333	5.06	1.06811	0.000174815	0.0017735	Up	transporter family protein putative expressed
Os01g0160100	4.52	4.18	4.22	7.92	9.34	9.82	4.30667	9.02667	1.06762	2.45e-12	1.61504e-10	Up	thiamine pyrophosphate enzyme C-terminal TPP binding domain containing protein expressed
Os11g0490900	8.66	6.06	8	15.09	13.8	18.73	7.57333	15.8733	1.0676	1.9975e-07	5.06443e-06	Up	WRKY72 expressed
Os12g0633700	0.65	0.76	0.68	1.74	1.41	1.23	0.696667	1.46	1.06743	0.00177821	0.01227	Up	expressed protein
Os03g0268600	13.03	11.02	13.63	28.06	27.02	23.82	12.56	26.3	1.06623	5.53024e-14	4.55691e-12	Up	protein phosphatase 2C putative expressed
Os07g0542600	0.95	0.51	0.79	1.18	1.52	2.01	0.75	1.57	1.0658	0.00455111	0.0263474	Up	TKL_IRAK_DUF26-ld.6 - DUF26 kinases have homology to DUF26 containing loci expressed
Os01g0674400	9.75	5.31	7.55	15.08	18.13	14.09	7.53667	15.7667	1.06488	7.15334e-05	0.000827278	Up	expressed protein
Os11g0579200	1.49	0.91	1.4	2.38	2.95	2.61	1.26667	2.64667	1.06314	0.00200001	0.0135021	Up	expressed protein
Os03g0281900	5.27	5.36	5.82	13.17	11.98	9.19	5.48333	11.4467	1.0618	8.05928e-10	3.45477e-08	Up	white-brown complex homolog protein putative expressed
Os04g0666800	5.35	5.02	7.7	14.77	10.19	12.76	6.02333	12.5733	1.06173	3.75983e-05	0.000477038	Up	dirigent-like protein pDIR17 putative expressed
Os09g0394600	4.56	3.81	3.87	7.75	8.25	9.5	4.08	8.5	1.05889	7.05819e-10	3.05656e-08	Up	endonuclease Fexonuclease Fphosphatase family domain containing protein expressed
Os04g0522500	2.75	1.58	2.15	4.49	3.22	5.76	2.16	4.49	1.05568	0.00100484	0.00761952	Up	gibberellin 2-beta-dioxygenase 7 putative expressed
Os03g0829466	0.29	0.17	0.18	0.45	0.41	0.47	0.213333	0.443333	1.05528	0.00825494	0.0420819	Up	--
Os09g0549700	1.18	1.04	0.86	2.1	1.77	2.53	1.02667	2.13333	1.05514	0.00400354	0.0237332	Up	ribosomal L18p FL5e family protein putative expressed
Os02g0154000	0.26	0.32	0.32	0.52	0.61	0.74	0.3	0.623333	1.05504	0.00395406	0.0234774	Up	phytosulfokine receptor precursor putative expressed
Os03g0834050	1.98	1.21	0.83	2.69	2.93	2.73	1.34	2.78333	1.05458	0.00406822	0.024035	Up	haloacid dehalogenase-like hydrolase family protein putative expressed
Os01g0793900	5.39	7.16	9.23	11.67	12.31	21.25	7.26	15.0767	1.05428	0.000698315	0.00560466	Up	expressed protein
Os03g0177400	648.2	545.46	559.03	1227.29	1318.35	1091.48	584.23	1212.37	1.05323	4.79609e-19	6.94007e-17	Up	elongation factor Tu putative expressed
Os01g0930400	2.21	1.24	2.32	3.23	4.09	4.65	1.92333	3.99	1.05278	0.000229606	0.0022302	Up	potassium transporter putative expressed
Os01g0583300	1.17	1.65	1.68	2.36	4.04	2.93	1.5	3.11	1.05195	0.000555185	0.00464701	Up	expressed protein
Os07g0450000	21.48	17.34	19.52	41.19	46.35	33.32	19.4467	40.2867	1.05078	2.0614e-09	8.04598e-08	Up	60S ribosomal protein L44 putative expressed
Os08g0448000	8.14	5.9	7.23	9.98	13.89	20.18	7.09	14.6833	1.05032	5.74035e-05	0.000684137	Up	AMP-binding domain containing protein expressed
Os10g0112100	4.36	3	5.24	6.05	9.29	10.74	4.2	8.69333	1.04952	0.00110531	0.00825892	Up	uncharacterized Cys-rich domain containing protein putative expressed
Os03g0601000	0.99	0.51	0.95	1.71	1.75	1.61	0.816667	1.69	1.0492	0.00309032	0.0191942	Up	expressed protein
Os07g0203275	3.6	1.77	2.62	5.05	6.39	5.08	2.66333	5.50667	1.04795	0.00197417	0.0133497	Up	Ribosomal protein S1, RNA-binding domain domain containing protein. (Os07t0203275-00)
Os12g0624800	1.39	1.1	1.31	2.46	2.85	2.54	1.26667	2.61667	1.04669	6.60123e-06	0.000106539	Up	expressed protein
Os10g0150200	3.84	1.92	4.07	6.32	8.49	5.49	3.27667	6.76667	1.04622	0.00434605	0.0253632	Up	expressed protein
Os08g0331900	0.85	0.87	0.59	1.65	1.5	1.62	0.77	1.59	1.0461	0.00276918	0.0175598	Up	receptor-like protein kinase precursor putative expressed
Os02g0598200	0.49	0.79	0.44	1.29	1.13	1.13	0.573333	1.18333	1.04541	0.000979422	0.00745154	Up	B3 DNA binding domain containing protein expressed
Os09g0570100	6.59	6.12	7.54	11.76	16.08	13.9	6.75	13.9133	1.04351	2.45037e-08	7.63527e-07	Up	protein kinase family protein putative expressed
Os04g0569100	3.04	3.27	3.08	7.19	6.91	5.24	3.13	6.44667	1.04239	2.32959e-09	8.99804e-08	Up	homeobox and START domains containing protein putative expressed
Os02g0152400	27.72	22.02	22.71	60.05	45.56	43.57	24.15	49.7267	1.042	1.52797e-09	6.21631e-08	Up	ribulose bisphosphate carboxylase small chain chloroplast precursor putative expressed
Os05g0360400	1.86	1.84	2.12	2.33	4.27	5.38	1.94	3.99333	1.04154	0.00298733	0.0186875	Up	RING-H2 finger protein putative expressed
Os02g0282000	1.88	1.72	1.64	3.4	3.65	3.73	1.74667	3.59333	1.04072	1.39095e-12	9.55117e-11	Up	NB-ARC domain containing protein expressed
Os09g0448200	10.75	7.36	11.31	15.78	24.33	20.41	9.80667	20.1733	1.04061	2.41294e-06	4.51309e-05	Up	potassium transporter putative expressed
Os12g0615900	6.21	5.5	3.41	7.55	11.66	11.88	5.04	10.3633	1.03999	0.00029826	0.00278051	Up	WD domain G-beta repeat domain containing protein expressed
Os03g0194900	31.67	32.09	36.68	61.72	63.03	81.72	33.48	68.8233	1.0396	4.55913e-12	2.90843e-10	Up	membrane protein putative expressed
Os03g0593600	1.03	0.57	0.63	1.78	1.33	1.47	0.743333	1.52667	1.0383	0.00572241	0.0315578	Up	cytochrome P450 putative expressed
Os03g0743500	9.12	5.54	8.44	12.77	17.25	17.4	7.7	15.8067	1.0376	7.15691e-06	0.000113896	Up	OsCML4 - Calmodulin-related calcium sensor protein expressed
Os11g0592000	63.07	38.11	90.15	103.02	164.5	125.18	63.7767	130.9	1.03736	0.000373554	0.0033407	Up	WIP3 - Wound-induced protein precursor expressed
Os09g0298200	70.4	59.8	61.94	117.82	122.76	153.69	64.0467	131.423	1.03703	4.43184e-14	3.73484e-12	Up	glucose-1-phosphate adenylyltransferase large subunit chloroplast precursor putative expressed
Os06g0218300	6.5	5.6	5.57	7.94	10.8	17.5	5.89	12.08	1.03628	0.00020737	0.00204979	Up	zinc finger C3HC4 type domain containing protein expressed
Os04g0562100	5.83	5.36	6.79	12.78	12.16	11.93	5.99333	12.29	1.03605	7.45614e-12	4.61751e-10	Up	transmembrane amino acid transporter protein putative expressed
Os02g0212300	2.33	1.93	3.94	5	5.46	6.34	2.73333	5.6	1.03477	0.00132911	0.00961629	Up	expressed protein
Os07g0130400	2.56	2	2.51	4.46	5.09	4.93	2.35667	4.82667	1.03428	2.66571e-08	8.21992e-07	Up	lectin-like receptor kinase putative expressed
Os08g0124500	2.06	1.45	1.76	3.3	3.6	3.89	1.75667	3.59667	1.03382	1.07217e-06	2.20103e-05	Up	lectin-like receptor kinase 1 putative expressed
Os08g0521000	0.61	0.99	1	1.91	1.81	1.6	0.866667	1.77333	1.03291	0.00480476	0.0274304	Up	expressed protein
Os08g0334900	1.13	1.08	1.11	2.55	1.72	2.52	1.10667	2.26333	1.03223	0.000210783	0.00207795	Up	xyloglucan fucosyltransferase putative expressed
Os01g0954000	57.45	49.75	54.68	118.16	109.78	103.04	53.96	110.327	1.03182	1.10427e-19	1.6944e-17	Up	NADPH quinone oxidoreductase putative expressed
Os03g0741000	5.99	5.86	6.17	15.36	11.31	10.16	6.00667	12.2767	1.03128	2.23461e-06	4.22214e-05	Up	acyl-desaturase chloroplast precursor putative expressed
Os12g0197100	0.37	0.58	0.48	0.94	0.98	1	0.476667	0.973333	1.02995	0.0049894	0.0282238	Up	phosphoribosylamine--glycine ligase putative expressed
Os11g0108932	7.38	8.74	8.53	15.4	16.91	18	8.21667	16.77	1.02926	2.51293e-15	2.45209e-13	Up	F-box FLRR-repeat protein 3 putative expressed
Os10g0323500	0.81	0.54	0.52	1.28	1.03	1.5	0.623333	1.27	1.02675	0.00519375	0.029196	Up	Os10bglu34 - beta-glucosidase homologue similar to Os3bglu6 expressed
Os09g0381300	4.35	3.49	3.55	7.77	8.41	7.01	3.79667	7.73	1.02574	4.47174e-10	2.0345e-08	Up	expressed protein
Os01g0261200	31.74	28.54	23.22	54.03	58.95	57.02	27.8333	56.6667	1.02569	2.66241e-14	2.30929e-12	Up	no apical meristem protein putative expressed
Os04g0573900	8.48	7.7	10.95	16.88	20.16	18.19	9.04333	18.41	1.02556	6.33985e-09	2.23887e-07	Up	cytochrome P450 putative expressed
Os04g0322100	1.18	0.7	0.92	1.95	2.26	1.49	0.933333	1.9	1.02554	0.00907193	0.0454117	Up	cysteine-rich receptor-like protein kinase putative expressed
Os02g0782900	1.86	2.75	2.44	4.3	5.35	4.69	2.35	4.78	1.02435	0.00132534	0.00959131	Up	expressed protein
Os06g0501900	2.37	1.87	1.74	3.28	4.05	4.83	1.99333	4.05333	1.02393	4.98669e-05	0.000609012	Up	cytochrome P450 putative expressed
Os10g0517500	61.23	79.71	60	69.39	157.7	181.5	66.98	136.197	1.02389	0.000465944	0.00400051	Up	cystathionine gamma-synthase putative expressed
Os02g0530300	10.54	10.14	8.93	19.62	20.94	19.64	9.87	20.0667	1.02368	4.07273e-12	2.60936e-10	Up	zinc finger A20 and AN1 domain-containing stress-associated protein putative expressed
Os01g0362533	4.27	3.41	3.47	8.43	7.04	7.16	3.71667	7.54333	1.02119	3.58541e-05	0.000457649	Up	--
Os02g0655100	2.54	1.35	2.67	3.92	5.14	4.25	2.18667	4.43667	1.02074	0.00140423	0.0100681	Up	expressed protein
Os01g0899200	8.46	7.44	9.85	17.85	17.78	16.6	8.58333	17.41	1.02031	1.52291e-09	6.20542e-08	Up	methyltransferase putative expressed
Os01g0605000	2.18	2.67	1.72	4.55	5.71	3.06	2.19	4.44	1.01963	0.000721188	0.00576329	Up	--
Os05g0456800	1.49	1.38	1.21	2.71	3.14	2.42	1.36	2.75667	1.01932	3.40894e-06	6.05525e-05	Up	--
Os02g0803300	4.11	3.54	4.04	7.71	7.5	8.47	3.89667	7.89333	1.01839	1.049e-11	6.31185e-10	Up	ANTH putative expressed
Os11g0134500	14.09	10.77	9.44	22.68	24.75	22.03	11.4333	23.1533	1.01797	2.13025e-09	8.29287e-08	Up	WD domain G-beta repeat domain containing protein expressed
Os03g0350100	35.31	23.16	22	51.65	60.41	50.86	26.8233	54.3067	1.01764	1.15561e-07	3.07998e-06	Up	nucleolar protein NOP5-1 putative expressed
Os11g0112400	1.98	2.76	2.98	5.5	5.51	4.61	2.57333	5.20667	1.01672	4.39168e-05	0.000545539	Up	peroxidase precursor putative expressed
Os04g0486950	1.78	1.14	1.83	3.57	3.27	2.77	1.58333	3.20333	1.01661	0.000149771	0.00155724	Up	malate synthase glyoxysomal putative expressed
Os06g0320200	0.89	0.82	0.99	2.62	1.35	1.49	0.9	1.82	1.01594	0.00456216	0.0263908	Up	Os6bglu24 - beta-glucosidase homologue similar to G. max isohydroxyurate hydrolase expressed
Os03g0201700	6.04	4.37	5.11	9.65	11.23	10.49	5.17333	10.4567	1.01526	1.33377e-08	4.401e-07	Up	expressed protein
Os05g0186300	33.72	34.93	37.21	72.94	64.54	76.46	35.2867	71.3133	1.01505	1.73178e-20	3.02185e-18	Up	NADP-dependent malic enzyme chloroplast precursor putative expressed
MSTRG.6014	1.91	0.9	1.36	3.15	2.79	2.48	1.39	2.80667	1.01377	0.00182061	0.0125102	Up	--
Os01g0161200	0.44	0.73	0.4	1.22	0.98	0.97	0.523333	1.05667	1.01372	0.00272465	0.0173368	Up	--
Os07g0196300	1.99	1.5	1.51	2.37	3.41	4.31	1.66667	3.36333	1.01293	0.000829639	0.0064729	Up	OsFBX221 - F-box domain containing protein expressed
Os02g0562600	0.96	0.64	1.29	1.49	2.11	2.23	0.963333	1.94333	1.01243	0.00190081	0.0129592	Up	MLO domain containing protein putative expressed
Os10g0496000	1.28	1.23	0.99	2.23	2.53	2.3	1.16667	2.35333	1.01231	0.000224776	0.00219046	Up	dof zinc finger domain containing protein putative expressed
Os01g0933200	31.54	33.36	29.06	70.32	55.78	63.34	31.32	63.1467	1.01162	2.95712e-15	2.86666e-13	Up	heavy metal-associated domain containing protein expressed
Os06g0267450	2.26	2.19	1.85	4.03	4.61	4.06	2.1	4.23333	1.0114	1.85424e-06	3.57867e-05	Up	--
Os07g0190000	11.89	11.16	14.19	30.13	23.82	21.12	12.4133	25.0233	1.01138	6.63213e-09	2.32823e-07	Up	transketolase putative expressed
Os10g0527800	22.79	11.86	13.83	24.78	34.02	38.92	16.16	32.5733	1.01126	0.000169273	0.00172554	Up	glutathione S-transferase putative expressed
Os01g0818600	9.98	12.91	9.55	16.34	23.21	25.81	10.8133	21.7867	1.01063	1.28058e-06	2.57541e-05	Up	ATP binding protein putative expressed
Os01g0100700	116.71	86.85	87.16	186.24	221.45	178	96.9067	195.23	1.01051	1.09664e-10	5.55134e-09	Up	40S ribosomal protein S5 putative expressed
Os01g0605100	4.39	5.24	4.3	7.86	11.74	8.46	4.64333	9.35333	1.01032	1.49814e-06	2.95878e-05	Up	mitochondrial chaperone BCS1 putative expressed
Os03g0241200	98.77	67.75	80.44	164.36	181.9	151.01	82.32	165.757	1.00975	3.65703e-10	1.70035e-08	Up	ribosomal protein L7Ae putative expressed
Os03g0195475	3.93	3	4.08	7.52	7.88	6.75	3.67	7.38333	1.00849	3.03619e-08	9.2851e-07	Up	--
Os01g0498300	0.85	0.98	0.74	1.42	1.46	2.29	0.856667	1.72333	1.0084	0.00274183	0.0174237	Up	glycosyltransferase putative expressed
Os05g0427400	17.94	15.79	17.49	25.72	28.78	48.5	17.0733	34.3333	1.00787	1.3248e-05	0.000194876	Up	phenylalanine ammonia-lyase putative expressed
Os01g0712700	31.8	31.04	23.21	42.61	64.08	66.27	28.6833	57.6533	1.00719	4.66424e-07	1.06925e-05	Up	cytidine Fdeoxycytidylate deaminase putative expressed
Os08g0559700	2.74	1.8	2.54	4.62	5.55	4.06	2.36	4.74333	1.00711	0.000627513	0.0051416	Up	expressed protein
Os03g0310600	0.57	0.66	1.01	1.35	1.35	1.8	0.746667	1.5	1.00643	0.00884721	0.0444744	Up	plant protein of unknown function domain containing protein expressed
Os01g0612500	2.32	2.24	4.03	6.35	6.34	4.56	2.86333	5.75	1.00587	0.00129775	0.00943078	Up	OsPOP2 - Putative Prolyl Oligopeptidase homologue expressed
Os06g0141700	2.66	2.1	1.33	3.94	4.17	4.1	2.03	4.07	1.00355	0.00442444	0.0257447	Up	early nodulin 93 ENOD93 protein putative expressed
Os04g0184100	0.81	1.39	0.58	1.79	2.01	1.77	0.926667	1.85667	1.00259	0.00679881	0.0362213	Up	amidase putative expressed
Os07g0603100	6.44	3.73	5.03	9.26	11.33	9.82	5.06667	10.1367	1.00047	5.65381e-06	9.33303e-05	Up	RNA-binding protein-like putative expressed
Os07g0665900	7.93	6.47	6.06	14.2	14.86	11.87	6.82	13.6433	1.00035	7.82722e-09	2.722e-07	Up	expressed protein
Os07g0619400	25.51	23.25	18.64	10.29	13.42	9.98	22.4667	11.23	-1.00043	1.55412e-07	4.04398e-06	Down	EF hand family protein expressed
Os09g0545300	7.18	8.16	7.3	3.24	3.69	4.38	7.54667	3.77	-1.00128	9.08624e-06	0.000140602	Down	OsSAUR39 - Auxin-responsive SAUR gene family member expressed
Os12g0438400	15.57	20.17	19.75	9.12	9.19	9.35	18.4967	9.22	-1.00443	2.76413e-13	2.11328e-11	Down	expressed protein
MSTRG.12588	3.82	1.92	2.41	1.15	1.32	1.59	2.71667	1.35333	-1.00532	0.00250057	0.0161852	Down	heat shock protein-related-like [Oryza sativa Japonica Group]
Os08g0551225	3.46	3.29	3.07	1.79	1.51	1.59	3.27333	1.63	-1.00589	6.41617e-10	2.79485e-08	Down	--
Os12g0242900	3.77	3.29	2.24	2.01	1.38	1.24	3.1	1.54333	-1.00622	0.0011282	0.00840243	Down	POLA2 - Putative DNA polymerase alpha complex subunit expressed
Os06g0613500	29.82	35.8	29.1	17.25	15.53	14.36	31.5733	15.7133	-1.00672	3.2261e-13	2.44755e-11	Down	helix-loop-helix DNA-binding putative expressed
Os09g0481800	11.68	12.2	8.41	3.15	5.49	7.43	10.7633	5.35667	-1.00672	0.00131015	0.00950459	Down	expressed protein
Os01g0580500	5.25	5.15	4.48	1.6	2.76	3.04	4.96	2.46667	-1.00778	0.000335127	0.00306354	Down	1-aminocyclopropane-1-carboxylate oxidase protein putative expressed
Os03g0137800	8.04	5.37	5.12	2.77	3.08	3.35	6.17667	3.06667	-1.01016	5.84574e-05	0.000695859	Down	cyclin-dependent kinase inhibitor putative expressed
Os03g0202001	22.84	23.26	16.09	8.91	9.38	12.57	20.73	10.2867	-1.01094	2.99305e-07	7.28949e-06	Down	adenylyl-sulfate kinase putative expressed
Os08g0550600	3.82	4.2	3.79	2.15	1.63	2.08	3.93667	1.95333	-1.01104	3.72449e-09	1.37932e-07	Down	transporter monovalent cation%3Aproton antiporter-2 family putative expressed
Os02g0755400	5.07	3.33	3.31	1.68	2.22	1.91	3.90333	1.93667	-1.01113	6.49367e-06	0.000105146	Down	RNA recognition motif containing protein putative expressed
Os04g0463000	4.26	5.83	3.82	2.22	2.1	2.58	4.63667	2.3	-1.01145	1.7495e-06	3.39864e-05	Down	atypical receptor-like kinase MARK putative expressed
Os03g0418700	8.27	8.44	8.57	4.97	3.81	3.76	8.42667	4.18	-1.01146	1.13393e-11	6.76798e-10	Down	expressed protein
Os07g0537550	3.05	3.35	4.95	1.99	2.09	1.55	3.78333	1.87667	-1.01149	0.000629743	0.00515187	Down	--
Os01g0957100	30.04	37.6	30.96	20.64	13.78	14.47	32.8667	16.2967	-1.01205	6.30835e-09	2.23374e-07	Down	expressed protein
Os04g0388700	6.78	4.97	4.98	3.16	3.05	2.08	5.57667	2.76333	-1.01299	7.92804e-06	0.000124498	Down	nodulin putative expressed
Os10g0195000	3.39	3.8	2.82	1.33	1.68	1.95	3.33667	1.65333	-1.01303	3.08173e-05	0.000403248	Down	MATE efflux family protein putative expressed
Os01g0622066	3.77	5.42	2.9	2.12	2	1.87	4.03	1.99667	-1.01319	0.00209772	0.0140607	Down	--
Os03g0857600	43.64	43.2	47.18	23.74	22.17	20.48	44.6733	22.13	-1.01341	1.24371e-19	1.89196e-17	Down	receptor protein kinase putative expressed
Os08g0389700	361.84	362.09	358.69	195.35	171.53	169.23	360.873	178.703	-1.01393	2.27487e-29	8.43521e-27	Down	membrane protein putative expressed
Os10g0328600	3.14	2.99	5	1.99	1.51	2.01	3.71	1.83667	-1.01433	0.000127174	0.00136093	Down	--
Os10g0130800	6.61	7.19	5.98	3.97	2.9	2.9	6.59333	3.25667	-1.01761	1.78185e-09	7.13317e-08	Down	disease resistance RPP13-like protein 1 putative expressed
Os10g0575900	10.26	10.11	7.39	4.56	4.07	5.08	9.25333	4.57	-1.01778	5.52016e-06	9.15317e-05	Down	expressed protein
Os01g0938200	21.09	23.42	18.32	12.25	9.11	9.66	20.9433	10.34	-1.01825	1.00792e-10	5.12847e-09	Down	RNA recognition motif containing protein putative expressed
MSTRG.5532	2.13	4.24	2.79	1.4	1.45	1.67	3.05333	1.50667	-1.01902	0.000106679	0.00116568	Down	ATP synthase subunit a, chloroplastic [Triticum urartu]
Os09g0445500	2.75	4.94	2.92	1.36	1.45	2.42	3.53667	1.74333	-1.02054	0.00342327	0.020856	Down	ZOS9-13 - C2H2 zinc finger protein expressed
MSTRG.28961	1.88	1.72	2.29	0.82	0.79	1.29	1.96333	0.966667	-1.02221	0.00734542	0.0384091	Down	hypothetical protein OsI_25764 [Oryza sativa Indica Group]
Os12g0235700	3.38	4.75	2.25	1.72	1.33	2.06	3.46	1.70333	-1.02241	0.000714331	0.00571619	Down	expressed protein
Os05g0594500	48.88	57.62	57.14	22.78	29.02	28.65	54.5467	26.8167	-1.02436	6.14026e-15	5.76407e-13	Down	expressed protein
Os04g0461000	1.77	1.88	1.72	1.06	0.8	0.78	1.79	0.88	-1.02438	0.000661178	0.00536613	Down	MYB family transcription factor putative expressed
Os10g0565150	10.59	10.7	9.02	4.69	3.93	6.27	10.1033	4.96333	-1.02545	1.40712e-07	3.67761e-06	Down	--
Os03g0162200	49.52	45.67	37.11	24.64	19.11	21.23	44.1	21.66	-1.02575	5.59854e-11	2.95507e-09	Down	Core histone H2A FH2B FH3 FH4 domain containing protein putative expressed
Os06g0306600	4.2	4.48	4.29	1.83	2.07	2.47	4.32333	2.12333	-1.02581	1.44518e-06	2.86754e-05	Down	gibberellin receptor GID1L2 putative expressed
Os07g0603300	19.73	21.12	20.83	13.32	7.83	9.13	20.56	10.0933	-1.02644	6.10249e-08	1.75411e-06	Down	expressed protein
Os04g0496300	64.67	61.95	44.15	16.78	29.48	37.56	56.9233	27.94	-1.02669	9.82655e-05	0.00108564	Down	expressed protein
Os07g0658600	47.3	75.93	58.16	29.55	26.14	33.32	60.4633	29.67	-1.02706	9.7789e-09	3.31143e-07	Down	eukaryotic aspartyl protease domain containing protein expressed
Os11g0156300	6.91	7.14	8.7	2.82	4.06	4.28	7.58333	3.72	-1.02753	3.6027e-06	6.34624e-05	Down	DUF623 domain containing protein expressed
Os11g0291475	51.98	61.3	62.61	32.1	26.76	27.41	58.63	28.7567	-1.02774	1.19693e-16	1.32981e-14	Down	--
Os03g0388900	43.92	38.16	37.5	20.63	19.14	18.76	39.86	19.51	-1.03073	7.09314e-21	1.28299e-18	Down	ICE-like protease p20 domain containing protein putative expressed
Os02g0662100	326.47	392.82	303.24	213.99	129.76	156.58	340.843	166.777	-1.03119	1.9291e-08	6.15982e-07	Down	LTPL113 - Protease inhibitor Fseed storage FLTP family protein precursor expressed
Os09g0248900	21.03	24.67	26.43	11.94	11.7	11.62	24.0433	11.7533	-1.03257	6.24579e-18	7.98599e-16	Down	retrotransposon protein putative unclassified expressed
Os07g0250900	5.42	5.92	6.42	2.37	3.23	3.08	5.92	2.89333	-1.03286	8.86739e-06	0.000137791	Down	harpin-induced protein 1 domain containing protein expressed
Os03g0374500	1.45	1.39	1.13	0.56	0.55	0.83	1.32333	0.646667	-1.03308	0.00216926	0.0144312	Down	calmodulin-binding protein putative expressed
Os03g0132250	5.63	7.2	6.84	3.54	2.67	3.4	6.55667	3.20333	-1.03339	1.44243e-06	2.86401e-05	Down	--
Os01g0922100	19.76	18.69	16.2	7.28	9	10.4	18.2167	8.89333	-1.03446	4.04908e-10	1.86509e-08	Down	antifreeze glycoprotein putative expressed
Os11g0173900	1.03	1.26	0.66	0.55	0.5	0.39	0.983333	0.48	-1.03465	0.00292942	0.018399	Down	expressed protein
Os03g0703100	46.75	48.19	50.35	22.03	24.19	24.62	48.43	23.6133	-1.0363	2.68727e-26	7.97151e-24	Down	Os3bglu8 - beta-glucosidase exo-beta-glucansase high similarity to Os3bglu7 expressed
Os09g0567800	41.52	46.13	44.68	24.61	17.2	22.69	44.11	21.5	-1.03677	1.56496e-10	7.71146e-09	Down	GDSL-like lipase Facylhydrolase putative expressed
Os11g0257800	2.25	2.6	1.92	0.76	0.97	1.56	2.25667	1.09667	-1.04107	0.00365603	0.0220029	Down	--
Os11g0481500	5.26	7.42	4.97	2.69	3.84	2.04	5.88333	2.85667	-1.0423	0.00116964	0.00865169	Down	expressed protein
Os11g0212900	1	0.99	0.77	0.43	0.44	0.47	0.92	0.446667	-1.04244	0.000448398	0.00387453	Down	Serine/threonine protein kinase-related domain containing protein. (Os11t0212900-01)
MSTRG.8125	3.28	3.17	3.54	1.61	1.83	1.41	3.33	1.61667	-1.0425	1.13425e-07	3.03345e-06	Down	--
Os12g0554800	21.04	20.79	20.6	11.96	10.44	7.9	20.81	10.1	-1.04292	3.05152e-10	1.43683e-08	Down	polygalacturonase putative expressed
Os03g0214100	25.39	21.21	13.57	9.68	9.03	10.49	20.0567	9.73333	-1.04308	7.36372e-07	1.59211e-05	Down	RPA1B - Putative single-stranded DNA binding complex subunit 1 expressed
Os02g0695900	5.32	5.25	4.68	1.34	2.41	3.64	5.08333	2.46333	-1.04516	0.00385376	0.022991	Down	oligopeptide transporter 4 putative expressed
Os09g0528700	5.43	5.81	5.34	2.8	2.32	2.91	5.52667	2.67667	-1.04597	2.61418e-09	1.00061e-07	Down	cytochrome P450 putative expressed
Os07g0587250	7.2	6.1	5	2.97	2.19	3.7	6.1	2.95333	-1.04647	0.00209289	0.0140397	Down	expressed protein
Os11g0153400	11.24	13.27	12.06	6.05	5.67	5.98	12.19	5.9	-1.04691	1.15186e-17	1.42965e-15	Down	rhoGAP domain containing protein expressed
Os09g0273950	11.87	13.06	11.75	6.66	4.82	6.27	12.2267	5.91667	-1.04717	1.45618e-08	4.77306e-07	Down	expressed protein
Os05g0355300	11.15	15.49	13.35	7.64	5.41	6.3	13.33	6.45	-1.04731	2.4086e-07	5.98899e-06	Down	zinc finger C3HC4 type domain containing protein expressed
Os02g0278700	3.82	3.99	2.78	1.68	1.37	2.07	3.53	1.70667	-1.04849	5.30233e-06	8.83643e-05	Down	ent-kaurene synthase chloroplast precursor putative expressed
Os01g0935200	3.84	2.36	3.44	1.11	1.33	2.22	3.21333	1.55333	-1.0487	0.00343194	0.0208917	Down	histone-like transcription factor and archaeal histone putative expressed
Os12g0502300	6.23	5.23	3.51	3.01	1.64	2.58	4.99	2.41	-1.05001	0.000354532	0.00320733	Down	cyclin putative expressed
Os06g0260250	28.43	37.29	32.52	18.55	15.5	13.37	32.7467	15.8067	-1.05081	1.48704e-10	7.37652e-09	Down	--
Os01g0760900	7.3	7.48	5.71	4.16	3.41	2.32	6.83	3.29667	-1.05088	4.69881e-05	0.000577783	Down	ABIL3 putative expressed
Os03g0125600	34.58	40.97	32.64	19.32	15.19	17.66	36.0633	17.39	-1.05227	1.2377e-14	1.11937e-12	Down	serine Fthreonine-protein kinase putative expressed
Os08g0101100	32.56	31.28	19.78	12.77	12.95	14.56	27.8733	13.4267	-1.05378	1.04282e-07	2.81733e-06	Down	HMG1 F2 putative expressed
Os01g0616366	4.23	5.38	2.93	1.66	1.2	3.18	4.18	2.01333	-1.05392	0.0049569	0.0280935	Down	--
Os08g0200100	11.92	12.75	11.43	5.03	3.65	8.7	12.0333	5.79333	-1.05457	0.000203823	0.00202012	Down	acyl-desaturase chloroplast precursor putative expressed
Os04g0379800	3.52	4.23	2.83	1.4	1.74	1.95	3.52667	1.69667	-1.0556	4.10418e-05	0.000515438	Down	expressed protein
Os09g0521100	7.77	4.58	4.78	1.86	2.99	3.39	5.71	2.74667	-1.05581	0.000515744	0.00436713	Down	3-ketoacyl-CoA synthase precursor putative expressed
Os09g0400200	5.36	4.98	6.61	2.72	3.02	2.41	5.65	2.71667	-1.05641	5.00042e-08	1.46719e-06	Down	Similar to Cinnamyl alcohol dehydrogenase (EC 1.1.1.195).
Os05g0192100	22.9	30.25	25.18	12.03	14.05	11.58	26.11	12.5533	-1.05653	7.84039e-12	4.81527e-10	Down	acid phosphatase putative expressed
Os01g0213800	40.05	26.41	21.38	14.65	15.14	12.44	29.28	14.0767	-1.05661	8.12627e-07	1.73548e-05	Down	TCP family transcription factor putative expressed
Os04g0323500	1.36	1.62	1.43	0.72	0.76	0.64	1.47	0.706667	-1.05671	0.000365091	0.00328015	Down	expressed protein
Os01g0110800	26.64	30.36	25.57	15.69	11.03	12.97	27.5233	13.23	-1.05684	4.58052e-12	2.91581e-10	Down	TOO MANY MOUTHS precursor putative expressed
Os05g0215300	4.74	4.43	4.19	1.59	2.71	2.12	4.45333	2.14	-1.05727	1.25963e-05	0.000186734	Down	hydroquinone glucosyltransferase putative expressed
Os03g0113500	28.71	44.08	38.55	21.06	14.35	18.09	37.1133	17.8333	-1.05736	2.22587e-08	7.03177e-07	Down	AT-GTL1 putative expressed
Os01g0544450	11.57	9.59	6.96	4.41	4.59	4.51	9.37333	4.50333	-1.05757	2.52137e-08	7.81546e-07	Down	MCM4 - Putative minichromosome maintenance MCM complex subunit 4 expressed
Os04g0339400	9.54	8.36	5.06	2.33	5.39	3.31	7.65333	3.67667	-1.05769	0.00204739	0.0137781	Down	oxidoreductase aldo Fketo reductase family protein putative expressed
Os02g0753300	91.01	96.66	110.8	53.02	43.52	46.83	99.49	47.79	-1.05784	2.57874e-16	2.80204e-14	Down	wound Fstress protein putative expressed
Os04g0619600	5.38	5.41	4.91	4.49	1.11	1.94	5.23333	2.51333	-1.05813	0.00704444	0.0372458	Down	TKL_IRAK_CrRLK1L-1.9 - The CrRLK1L-1 subfamily has homology to the CrRLK1L homolog expressed
Os01g0827700	7.27	8.28	8.85	4.75	3.38	3.58	8.13333	3.90333	-1.05914	4.66789e-07	1.06925e-05	Down	GDSL-like lipase Facylhydrolase putative expressed
Os08g0524400	54.63	54.84	46.01	12.05	31.56	31	51.8267	24.87	-1.05929	0.00035665	0.00321962	Down	AIR12 putative expressed
Os05g0448300	10.65	15.62	14.66	8.44	4.07	7.13	13.6433	6.54667	-1.05936	6.32797e-05	0.000742535	Down	glycerol-3-phosphate acyltransferase putative expressed
Os05g0189900	51.99	37.4	41.43	18.25	22.9	21.62	43.6067	20.9233	-1.05944	5.11477e-11	2.72886e-09	Down	HAD superfamily phosphatase putative expressed
Os04g0412200	47.19	44.8	43.94	24.03	18.92	22.27	45.31	21.74	-1.05948	1.46983e-16	1.62691e-14	Down	2Fe-2S iron-sulfur cluster binding domain containing protein expressed
Os12g0527301	4.4	5.15	5.46	2.62	1.78	2.8	5.00333	2.4	-1.05986	0.000611155	0.00503172	Down	--
Os03g0674700	5.93	3.79	2.81	2.44	2.02	1.55	4.17667	2.00333	-1.05995	0.000968472	0.00738339	Down	growth regulating factor protein putative expressed
Os01g0822900	762.99	576.25	589.54	326.99	298.1	299.82	642.927	308.303	-1.0603	1.88489e-16	2.05564e-14	Down	LTPL16 - Protease inhibitor Fseed storage FLTP family protein precursor expressed
Os03g0336200	10.6	7.19	9.1	4.19	5.38	3.32	8.96333	4.29667	-1.06082	5.66302e-06	9.34093e-05	Down	bZIP transcription factor family protein putative expressed
Os06g0122001	4.55	5.71	3.93	3.02	2.24	1.54	4.73	2.26667	-1.06127	0.000293184	0.00273921	Down	--
Os10g0427900	4.73	5.99	3.82	1.95	2.42	2.59	4.84667	2.32	-1.06287	3.44891e-06	6.11219e-05	Down	expressed protein
Os01g0270300	34.25	27.43	26.03	13.46	11.77	16.67	29.2367	13.9667	-1.06579	4.43764e-10	2.02209e-08	Down	peroxidase precursor putative expressed
Os03g0717000	49.73	49.97	44.22	25.85	22.57	20.29	47.9733	22.9033	-1.06668	6.06857e-19	8.6133e-17	Down	receptor protein kinase TMK1 precursor putative expressed
Os06g0564700	1.22	1.48	1.01	0.61	0.69	0.47	1.23667	0.59	-1.06767	0.00348464	0.0211301	Down	cysteine synthase putative expressed
Os06g0179100	3.48	6.5	4.97	2.38	1.65	3.1	4.98333	2.37667	-1.06817	0.00193647	0.013157	Down	jp18 putative expressed
Os01g0937900	3.19	6.03	5.06	1.36	2.22	3.23	4.76	2.27	-1.06827	0.00774623	0.0400321	Down	classical arabinogalactan protein 26 precursor putative expressed
Os02g0528000	12.43	17.3	11.18	5.57	6.74	7.19	13.6367	6.5	-1.06898	1.02412e-06	2.11372e-05	Down	Zinc finger, RING-type domain containing protein. (Os02t0528000-00)
Os04g0588200	2.03	1.67	1.51	1.03	0.64	0.81	1.73667	0.826667	-1.07094	2.41132e-05	0.000325875	Down	DNA2 - Putative DNA replication helicase 2 protein expressed
Os10g0420200	3.67	3.62	3.05	1.37	1.26	2.29	3.44667	1.64	-1.07151	0.000251732	0.00241663	Down	IQ calmodulin-binding motif family protein putative expressed
Os04g0376400	3.5	3.94	3.47	1.19	1.82	2.18	3.63667	1.73	-1.07184	5.7291e-05	0.000683345	Down	glycosyl hydrolase putative expressed
Os06g0634700	1.02	1.55	1.11	0.51	0.59	0.65	1.22667	0.583333	-1.07235	0.00617185	0.0335008	Down	expressed protein
Os12g0541700	37.72	30.88	34.4	20.84	15.83	12.3	34.3333	16.3233	-1.07267	9.96632e-08	2.70486e-06	Down	RALFL4 - Rapid ALkalinization Factor RALF family protein precursor expressed
Os03g0362500	4.05	4.86	2.71	1.51	1.6	2.41	3.87333	1.84	-1.07387	0.000297672	0.00277677	Down	terpene synthase putative expressed
Os06g0121200	2.83	2.78	2.39	1.98	0.83	0.99	2.66667	1.26667	-1.074	0.00140446	0.0100681	Down	expressed protein
Os10g0545600	3.05	1.36	1.53	1	0.76	1.06	1.98	0.94	-1.07477	0.00470432	0.0269868	Down	zinc finger C3HC4 type domain containing protein expressed
Os10g0438500	4.23	3.7	3.56	1.66	1.91	1.88	3.83	1.81667	-1.07605	4.72809e-07	1.07888e-05	Down	OsFBX386 - F-box domain containing protein expressed
Os04g0360500	0.71	0.57	0.64	0.4	0.31	0.2	0.64	0.303333	-1.07717	0.00213937	0.0142833	Down	FAD-binding and arabino-lactone oxidase domains containing protein putative expressed
Os10g0330000	146.59	118.62	129.16	46.27	66.61	73.62	131.457	62.1667	-1.08037	1.47565e-09	6.02944e-08	Down	expressed protein
Os08g0376300	5.62	4.81	3.73	2.72	2.19	1.78	4.72	2.23	-1.08174	1.17057e-06	2.37835e-05	Down	receptor-like protein kinase 5 precursor putative expressed
Os01g0879100	11.85	12.18	13.08	7.01	6.49	4.03	12.37	5.84333	-1.08198	3.31852e-06	5.91946e-05	Down	--
Os06g0119300	0.86	0.84	0.99	0.4	0.38	0.49	0.896667	0.423333	-1.08278	0.000446869	0.0038647	Down	expressed protein
Os07g0147500	390.31	445.79	455.63	224.26	172.11	213.41	430.577	203.26	-1.08294	7.87279e-17	8.94783e-15	Down	photosystem II 10 kDa polypeptide chloroplast precursor putative expressed
Os09g0328800	3.23	3.98	3.71	1.8	2.06	1.29	3.64	1.71667	-1.08433	3.26563e-05	0.000421365	Down	expressed protein
Os10g0498100	0.82	1.08	0.86	0.48	0.49	0.33	0.92	0.433333	-1.08616	0.00289667	0.0182358	Down	epoxide hydrolase putative expressed
Os12g0609600	13.86	18.94	15.43	10.12	5.47	7.12	16.0767	7.57	-1.0866	6.81064e-06	0.000109206	Down	OsSAUR57 - Auxin-responsive SAUR gene family member expressed
Os06g0725000	12.5	10.69	11.64	3.82	6.91	5.64	11.61	5.45667	-1.08928	4.01749e-06	6.94088e-05	Down	rhodanese-like domain containing protein putative expressed
Os03g0164300	11.65	12.34	7.04	4.63	3.04	6.91	10.3433	4.86	-1.08967	0.000992728	0.00753539	Down	B3 DNA binding domain containing protein expressed
Os10g0563900	15.54	19.88	19.61	10.34	8.46	7.05	18.3433	8.61667	-1.09005	3.93137e-08	1.18516e-06	Down	cyclin putative expressed
Os02g0526700	8.13	8.77	8.11	3.31	4.13	4.3	8.33667	3.91333	-1.09107	2.34487e-10	1.12736e-08	Down	expressed protein
Os09g0501650	4.05	3.61	3.12	1.47	1.99	1.6	3.59333	1.68667	-1.09115	4.31525e-06	7.38117e-05	Down	--
Os07g0562400	3.59	2.42	3.09	1.62	1.14	1.51	3.03333	1.42333	-1.09163	3.12025e-05	0.000407263	Down	organic cation transporter-related putative expressed
Os10g0165400	16.56	16.07	19.46	4.36	11.25	8.83	17.3633	8.14667	-1.09176	0.000357252	0.00322407	Down	--
Os09g0304500	2.57	2.57	2.32	1.25	1.12	1.13	2.48667	1.16667	-1.09182	2.91552e-06	5.30589e-05	Down	plant protein of unknown function domain containing protein expressed
Os08g0130100	5.24	5.72	4.05	2.85	2.34	1.85	5.00333	2.34667	-1.09228	9.03402e-05	0.00101165	Down	LSD1 zinc finger domain containing protein expressed
Os06g0559900	3.25	3.3	4.56	1.67	1.47	2.07	3.70333	1.73667	-1.0925	1.00335e-05	0.000153577	Down	--
Os12g0568900	6.92	7.31	4.9	1.99	3.57	3.41	6.37667	2.99	-1.09266	0.000181166	0.00182669	Down	thaumatin family domain containing protein expressed
Os08g0467100	1.58	1.8	1.55	0.68	0.74	0.89	1.64333	0.77	-1.09369	2.91838e-05	0.000384247	Down	ZOS8-07 - C2H2 zinc finger protein expressed
Os06g0140400	13.78	15.17	16.67	5.88	8.22	7.26	15.2067	7.12	-1.09475	6.2094e-10	2.71275e-08	Down	homeobox associated leucine zipper putative expressed
Os08g0485500	9.53	6.86	6.02	2.43	3.59	4.47	7.47	3.49667	-1.09513	8.9358e-05	0.00100368	Down	expressed protein
Os03g0805700	5.68	3.52	4.35	1.7	3.13	1.51	4.51667	2.11333	-1.09574	0.000892428	0.00690299	Down	pheophorbide a oxygenase chloroplast precursor putative expressed
Os02g0730000	29.98	12.24	20.62	8.97	12.75	7.68	20.9467	9.8	-1.09587	0.000200351	0.00198902	Down	aldehyde dehydrogenase putative expressed
Os06g0636700	16.39	19.68	12.79	3.12	7.9	11.82	16.2867	7.61333	-1.09709	0.0034268	0.0208732	Down	GDSL-like lipase Facylhydrolase putative expressed
Os03g0748300	2.86	4.46	4.49	0.89	1.89	2.74	3.93667	1.84	-1.09727	0.00577403	0.0317598	Down	aldose 1-epimerase putative expressed
Os05g0358200	3	2.36	1.68	1.26	0.98	1.05	2.34667	1.09667	-1.09749	4.04547e-05	0.000508926	Down	POLA4 - Putative DNA polymerase alpha complex subunit expressed
Os08g0119500	3.11	3.48	2.74	1.75	1.22	1.39	3.11	1.45333	-1.09755	0.00015827	0.00162848	Down	methyltransferase domain containing protein expressed
Os01g0799500	85.07	105.1	110.81	60.83	35.04	44.62	100.327	46.83	-1.0992	4.11209e-08	1.23155e-06	Down	methyladenine glycosylase putative expressed
Os06g0140700	20	21.9	22.93	6.37	13.05	10.84	21.61	10.0867	-1.09925	4.18818e-06	7.18556e-05	Down	homeobox associated leucine zipper putative expressed
Os06g0643500	74.23	61.88	53.87	28.18	31.88	28.56	63.3267	29.54	-1.10014	2.00741e-15	1.96528e-13	Down	LTPL129 - Protease inhibitor Fseed storage FLTP family protein precursor expressed
Os04g0665600	9.77	8.63	8.51	4.78	3.94	3.83	8.97	4.18333	-1.10046	9.74629e-13	6.80268e-11	Down	Myb-like DNA-binding domain containing protein putative expressed
Os03g0311600	12.43	10.97	12.58	6.94	4.74	5.08	11.9933	5.58667	-1.10217	2.11597e-08	6.72758e-07	Down	expressed protein
Os04g0659800	1.35	2.32	1.7	0.68	1.08	0.74	1.79	0.833333	-1.10299	0.00183989	0.012631	Down	MBTB9 - Bric-a-Brac Tramtrack Broad Complex BTB domain with Meprin and TRAF Homology MATH domain expressed
Os05g0177500	2.94	4.28	2.99	0.86	1.22	2.67	3.40333	1.58333	-1.10398	0.00641187	0.0345821	Down	cytokinin-O-glucosyltransferase 1 putative expressed
Os05g0525900	10.95	13.09	15.02	4.04	4.63	9.5	13.02	6.05667	-1.10413	0.000385596	0.00342875	Down	zinc finger FCCCH transcription factor putative expressed
Os12g0613250	18.84	19.03	16.84	8.29	8.22	8.93	18.2367	8.48	-1.10471	3.71884e-24	9.19298e-22	Down	BTBN25 - Bric-a-Brac Tramtrack Broad Complex BTB domain with non-phototropic hypocotyl 3 NPH3 and coiled-coil domains expressed
Os02g0678800	12.31	7.78	6.17	3.89	4.39	3.93	8.75333	4.07	-1.1048	9.005e-05	0.00100916	Down	growth regulating factor protein putative expressed
Os01g0728100	38.95	50.93	41.67	25.49	22.58	13.02	43.85	20.3633	-1.1066	1.64636e-06	3.21511e-05	Down	GDSL-like lipase Facylhydrolase putative expressed
Os04g0528600	4.88	4.66	2.18	1.75	1.85	1.84	3.90667	1.81333	-1.10729	0.0002626	0.00250072	Down	ulp1 protease family C-terminal catalytic domain containing protein expressed
Os03g0655100	1.69	1.43	1.34	0.67	0.76	0.64	1.48667	0.69	-1.10741	0.00428719	0.0250938	Down	2-aminoethanethiol dioxygenase putative expressed
Os05g0449200	5.83	7.78	5.21	3	2.42	3.31	6.27333	2.91	-1.10821	3.26399e-07	7.84872e-06	Down	transferase family protein putative expressed
Os09g0439000	1.54	1.45	1.13	0.85	0.35	0.71	1.37333	0.636667	-1.10907	0.00241846	0.01575	Down	DNA repair metallo-beta-lactamase family protein expressed
Os12g0532600	6.46	12.26	12.37	6.09	3.97	4.35	10.3633	4.80333	-1.10938	0.000170276	0.00173398	Down	expressed protein
Os02g0177300	1.42	2.22	1.41	0.72	0.78	0.84	1.68333	0.78	-1.10977	0.00131961	0.00955689	Down	OsSPL5 - SBP-box gene family member expressed
MSTRG.670	3.45	2.19	1.57	0.74	1.06	1.54	2.40333	1.11333	-1.11015	0.00325561	0.0200196	Down	PREDICTED: translation initiation factor IF-2 [Oryza sativa Japonica Group]
Os09g0360500	20.11	16.93	18.34	7.48	11.44	6.7	18.46	8.54	-1.11209	1.11158e-07	2.98676e-06	Down	3-ketoacyl-CoA synthase precursor putative expressed
Os10g0499400	21.13	23.25	22.26	6.89	9.43	14.5	22.2133	10.2733	-1.11252	7.11691e-06	0.000113503	Down	cystathionin beta synthase protein putative expressed
Os01g0723500	9.23	10.18	11.52	4.39	5.27	4.63	10.31	4.76333	-1.114	1.61511e-10	7.93221e-09	Down	B3 DNA binding domain containing protein expressed
Os07g0676700	9.29	10.1	4.65	2.26	3.14	5.69	8.01333	3.69667	-1.11618	0.00264603	0.0169309	Down	--
Os03g0159600	6.45	8.36	7.57	4.37	2.6	3.34	7.46	3.43667	-1.11817	2.6185e-06	4.84259e-05	Down	late embryogenesis abundant protein D-34 putative expressed
Os01g0917900	4.92	8.61	6.43	2.54	2.25	4.4	6.65333	3.06333	-1.11897	0.000377545	0.00336928	Down	zinc finger C3HC4 type family protein expressed
Os04g0553300	4.7	6.01	4.34	1.6	3.15	2.17	5.01667	2.30667	-1.12092	0.000640825	0.00523099	Down	thioesterase family protein putative expressed
Os01g0741250	8.16	7.83	9	2.74	4.99	3.76	8.33	3.83	-1.12097	0.00179409	0.0123652	Down	--
MSTRG.14825	1.79	2.92	2.97	1.66	1.09	0.78	2.56	1.17667	-1.12144	0.000483511	0.00413101	Down	--
MSTRG.2166	1.56	1.82	2.06	1.07	0.83	0.6	1.81333	0.833333	-1.12168	0.00443849	0.0258062	Down	--
Os05g0517200	18.24	17.6	15.98	7.92	8.14	7.75	17.2733	7.93667	-1.12194	8.56062e-31	3.62774e-28	Down	trehalose synthase putative expressed
Os03g0100010	2.09	1.97	1.71	0.67	0.9	1.08	1.92333	0.883333	-1.12258	0.00027593	0.00260426	Down	expressed protein
Os02g0582600	4.71	4.01	6.98	4.01	1.26	1.94	5.23333	2.40333	-1.12269	0.00727177	0.0381315	Down	heavy metal transport Fdetoxification protein putative expressed
Os02g0226600	3.8	3.78	1.72	1.23	1.22	1.82	3.1	1.42333	-1.12299	0.0011575	0.00858402	Down	homeobox domain containing protein expressed
Os06g0729400	26.3	29.35	28.69	14.9	10.92	12.88	28.1133	12.9	-1.12388	1.80064e-12	1.21396e-10	Down	GASR8 - Gibberellin-regulated GASA FGAST FSnakin family protein precursor expressed
Os01g0500400	3.63	5.12	3.61	1.78	1.57	2.31	4.12	1.88667	-1.1268	0.000122889	0.00132175	Down	--
Os09g0421200	2.33	2.28	2.01	1.28	0.77	0.98	2.20667	1.01	-1.12751	0.00042165	0.00368853	Down	kinesin motor protein-related putative expressed
Os04g0415600	4.99	8.44	7.8	3.25	2.91	3.55	7.07667	3.23667	-1.12856	4.91202e-05	0.000601363	Down	ctr copper transporter family protein putative expressed
MSTRG.29715	4.12	5.17	5.93	2.53	2.35	2.08	5.07333	2.32	-1.12881	1.89427e-08	6.07476e-07	Down	--
Os02g0236600	79.07	101.23	82.82	37.24	41.45	41.59	87.7067	40.0933	-1.12932	2.59515e-20	4.42428e-18	Down	peroxidase precursor putative expressed
Os08g0494300	1.28	1.05	0.93	0.32	0.6	0.57	1.08667	0.496667	-1.12956	0.00606278	0.03306	Down	copine putative expressed
Os03g0409100	7.12	12.05	11.83	3.94	4.68	5.54	10.3333	4.72	-1.13045	1.00136e-06	2.07722e-05	Down	ATP-dependent protease putative expressed
Os03g0833100	9.76	13.64	7.24	4.29	3.72	5.96	10.2133	4.65667	-1.13308	5.901e-05	0.000701737	Down	sex determination protein tasselseed-2 putative expressed
Os10g0554001	2.55	5.34	4.35	2.74	1.29	1.55	4.08	1.86	-1.13327	0.00183185	0.0125816	Down	zinc finger family protein putative expressed
Os01g0635200	11.58	11.71	9.55	5.51	4.29	5.17	10.9467	4.99	-1.13338	3.93587e-07	9.22953e-06	Down	MYB family transcription factor putative expressed
Os02g0797400	14.2	11.26	8.61	4.57	5.66	5.27	11.3567	5.16667	-1.13623	6.86129e-09	2.40583e-07	Down	MCM5 - Putative minichromosome maintenance MCM complex subunit 5 expressed
Os03g0314500	4.42	6.94	7.59	3.01	1.9	3.71	6.31667	2.87333	-1.13644	9.85888e-05	0.0010884	Down	WD40-like Beta Propeller Repeat family protein expressed
MSTRG.33483	2.41	1.8	1.8	1.09	1.06	0.57	2.00333	0.906667	-1.14376	0.00950138	0.047203	Down	--
Os03g0727800	3.09	2.62	1.54	0.86	0.91	1.51	2.41667	1.09333	-1.14429	0.00222519	0.0147339	Down	OsFBX109 - F-box domain containing protein expressed
MSTRG.31385	1.51	3.33	1.89	0.75	1.17	1.12	2.24333	1.01333	-1.14654	0.000198308	0.00197403	Down	photosystem II 47 kDa protein (chloroplast) [Oryza nivara]
Os03g0710700	27.1	25.17	27.61	11.47	12.36	12.24	26.6267	12.0233	-1.14703	1.16675e-24	3.11806e-22	Down	GLTP domain containing protein putative expressed
Os02g0776900	13.18	9.2	6.24	4.41	4.01	4.5	9.54	4.30667	-1.14742	9.94622e-06	0.000152557	Down	growth regulating factor protein putative expressed
Os01g0223900	4.16	4.86	4.97	1.85	2.15	2.31	4.66333	2.10333	-1.14868	3.27864e-11	1.80107e-09	Down	receptor-like protein kinase putative expressed
Os06g0184866	3.27	5.65	3.43	1.8	1.64	2.13	4.11667	1.85667	-1.14876	1.78641e-06	3.46126e-05	Down	PPR repeat domain containing protein putative expressed
Os12g0274750	2621.1	2025.02	2262.12	1032.41	1125.05	955.26	2302.75	1037.57	-1.15014	2.11914e-20	3.63366e-18	Down	--
Os11g0175700	8.95	8.51	8.44	3.66	3.84	4.17	8.63333	3.89	-1.15015	6.88773e-16	7.13358e-14	Down	TCP family transcription factor putative expressed
Os10g0462600	11.38	10.37	12.93	5.85	4.26	5.51	11.56	5.20667	-1.15071	2.11474e-09	8.24332e-08	Down	expressed protein
Os08g0153900	2.15	2.27	1.22	0.88	0.7	0.96	1.88	0.846667	-1.15087	0.00347137	0.0210754	Down	expressed protein
Os02g0101400	9.06	8.22	7.26	5.01	3.14	2.9	8.18	3.68333	-1.15109	8.81074e-06	0.000137054	Down	GDSL-like lipase Facylhydrolase putative expressed
Os04g0498700	22.11	16.5	15.6	9.43	8.2	6.75	18.07	8.12667	-1.15286	4.93737e-10	2.20908e-08	Down	retrotransposon protein putative unclassified expressed
Os01g0207400	38.61	43.29	42.13	18.38	18.39	18.97	41.3433	18.58	-1.1539	5.98542e-28	1.99496e-25	Down	peptide-N4-asparagine amidase A putative expressed
Os01g0630300	3.43	5.34	3.79	1.4	1.36	2.88	4.18667	1.88	-1.15507	0.0021074	0.0141115	Down	expressed protein
MSTRG.25137	4.13	3.99	4.31	1.42	1.57	2.59	4.14333	1.86	-1.15549	0.000135387	0.00143075	Down	--
Os04g0556600	14.18	16.9	20.72	6.52	8.26	8.46	17.2667	7.74667	-1.15634	7.26244e-10	3.13585e-08	Down	cis-zeatin O-glucosyltransferase putative expressed
Os08g0462300	2.9	2.04	2.5	0.95	1.21	1.17	2.48	1.11	-1.15978	2.47265e-05	0.000333251	Down	OsFBX295 - F-box domain containing protein expressed
Os02g0302200	10.88	10.27	10.52	5.48	4.44	4.25	10.5567	4.72333	-1.16028	9.54118e-14	7.64945e-12	Down	aminotransferase classes I and II domain containing protein expressed
Os01g0117266	27.61	26.12	23.57	9.99	13.77	10.79	25.7667	11.5167	-1.16178	5.2423e-10	2.32101e-08	Down	protein kinase domain containing protein expressed
Os08g0479400	2.12	1.9	1.29	0.95	0.7	0.72	1.77	0.79	-1.16382	0.000245658	0.00236674	Down	ZF-HD homeobox protein putative expressed
Os07g0684100	30.75	37.62	36.67	18.24	13.51	15.11	35.0133	15.62	-1.16451	5.44676e-14	4.50063e-12	Down	thioredoxin putative expressed
Os04g0507700	32.83	27.48	21.9	10.21	14.23	12.21	27.4033	12.2167	-1.1655	1.62262e-10	7.95596e-09	Down	GDSL-like lipase Facylhydrolase putative expressed
Os03g0121200	67.56	70.49	70.13	32.6	32.15	27.99	69.3933	30.9133	-1.16657	1.34127e-31	6.12114e-29	Down	peroxidase precursor putative expressed
Os01g0619900	17.55	17.01	19.92	8.13	7.59	8.54	18.16	8.08667	-1.16715	1.90384e-17	2.28646e-15	Down	expressed protein
Os12g0207600	3.5	9.41	3.96	1.63	2.89	2.99	5.62333	2.50333	-1.16758	0.00378732	0.0226598	Down	ribulose bisphosphate carboxylase large chain precursor putative expressed
Os02g0308400	56.11	96.89	90.56	50.31	23.2	34.87	81.1867	36.1267	-1.16818	2.12235e-05	0.000292145	Down	fasciclin domain containing protein expressed
Os11g0703600	3.53	3.27	3.38	2.04	0.94	1.54	3.39333	1.50667	-1.17134	0.000150555	0.00156485	Down	expressed protein
Os01g0844000	6.97	6.22	8.21	2.86	3.82	2.82	7.13333	3.16667	-1.17161	6.3569e-05	0.00074534	Down	--
Os12g0256000	3.69	5.65	4.52	1.85	1.88	2.42	4.62	2.05	-1.17227	4.27854e-07	9.87694e-06	Down	CXE carboxylesterase putative expressed
Os04g0631200	70.2	50.95	42.43	31.55	20.69	20.29	54.5267	24.1767	-1.17335	1.76846e-07	4.50683e-06	Down	glycosyl hydrolases family 16 protein protein expressed
Os10g0557700	2.24	2.21	2.3	1.01	0.88	1.1	2.25	0.996667	-1.17474	0.000124579	0.00133702	Down	expressed protein
Os02g0445100	24.86	22.27	20.42	8.82	9.42	11.58	22.5167	9.94	-1.17968	1.71896e-12	1.16153e-10	Down	OsSAUR8 - Auxin-responsive SAUR gene family member expressed
Os02g0679700	5.13	6.86	6.77	3.85	2.11	2.32	6.25333	2.76	-1.17996	6.46338e-05	0.000756032	Down	DUF623 domain containing protein expressed
Os12g0267900	5.51	4.98	3.56	1.58	1.59	3.03	4.68333	2.06667	-1.18023	4.67967e-05	0.000576246	Down	zinc finger C3HC4 type domain containing protein expressed
Os11g0128400	3.92	2.87	2.39	1.61	1.28	1.16	3.06	1.35	-1.18057	6.14779e-06	0.000100092	Down	CDC45B - Putative DNA replication initiation protein expressed
Os05g0554400	5.76	6.56	5.96	3.29	2.25	2.52	6.09333	2.68667	-1.18141	7.08038e-10	3.06169e-08	Down	phosphatidylserine synthase putative expressed
Os06g0560000	9.24	8.42	12.24	3.26	5.26	4.66	9.96667	4.39333	-1.1818	2.97999e-07	7.26363e-06	Down	ferroportin1 domain containing protein expressed
Os05g0436900	7.81	9.3	6.92	4.08	3.03	3.48	8.01	3.53	-1.18213	4.8737e-10	2.19383e-08	Down	zinc finger DHHC domain-containing protein putative expressed
Os01g0850050	1.58	1.4	1.31	0.83	0.61	0.45	1.43	0.63	-1.18259	0.00602552	0.0329153	Down	--
Os09g0568700	8.19	5.33	8.89	2.61	5.17	2.09	7.47	3.29	-1.18302	0.00118729	0.00875893	Down	Cupin domain containing protein expressed
Os08g0290700	6.41	4.18	4.97	3.01	1.84	2	5.18667	2.28333	-1.18367	2.40247e-05	0.000325263	Down	O-methyltransferase putative expressed
Os02g0178700	4.31	5.41	4.75	2.02	1.66	2.69	4.82333	2.12333	-1.1837	1.39932e-05	0.000204474	Down	expressed protein
Os04g0679400	41.74	63.77	71.14	28.52	23.92	25.31	58.8833	25.9167	-1.18398	1.83529e-09	7.30765e-08	Down	stem-specific protein TSJT1 putative expressed
Os07g0132300	20.27	26.14	24.85	13.46	8.28	9.62	23.7533	10.4533	-1.18417	1.04841e-08	3.52209e-07	Down	expressed protein
Os03g0726500	297.1	253.45	215.96	107.37	122.7	106.79	255.503	112.287	-1.18616	3.29057e-19	4.87011e-17	Down	membrane protein putative expressed
Os03g0264600	10.99	11.88	10.12	4.72	4.74	5.02	10.9967	4.82667	-1.18797	1.95483e-18	2.60036e-16	Down	ZOS3-08 - C2H2 zinc finger protein expressed
Os07g0406800	7	5.34	4.25	2.98	2.13	2.17	5.53	2.42667	-1.1883	2.56705e-06	4.7593e-05	Down	POLA3 - Putative DNA polymerase alpha complex subunit expressed
Os01g0109500	2.95	2.88	2.2	1.55	1.05	0.92	2.67667	1.17333	-1.18982	0.00018471	0.00185485	Down	expressed protein
Os07g0663800	32.1	27.19	29.18	15.09	11.83	11.85	29.49	12.9233	-1.19025	2.67099e-15	2.59778e-13	Down	sex determination protein tasselseed-2 putative expressed
Os05g0491200	8.11	8.42	6.41	3.05	3.33	3.64	7.64667	3.34	-1.19498	8.65156e-11	4.43247e-09	Down	SNF1-related protein kinase regulatory subunit beta-1 putative expressed
Os10g0554800	10.11	7.45	5.09	1.73	4.3	3.86	7.55	3.29667	-1.19547	0.00195313	0.0132399	Down	LTPL147 - Protease inhibitor Fseed storage FLTP family protein precursor expressed
Os03g0780800	34.42	28.21	29.31	14.73	12.3	13.1	30.6467	13.3767	-1.19601	3.34161e-18	4.38609e-16	Down	fatty acid hydroxylase putative expressed
Os01g0102900	149.86	144.78	162.91	62.82	67.98	68.77	152.517	66.5233	-1.19703	2.59464e-32	1.2217e-29	Down	light-induced protein 1-like putative expressed
Os01g0756300	5.73	5	6.98	2.91	2.95	1.85	5.90333	2.57	-1.19976	1.63454e-05	0.000234123	Down	expressed protein
Os03g0297850	2	1.92	1.25	0.72	0.82	0.71	1.72333	0.75	-1.20024	0.000745547	0.00593238	Down	--
Os04g0444300	6.54	6.33	8.39	2.19	2.93	4.12	7.08667	3.08	-1.20218	8.71901e-06	0.000135769	Down	expressed protein
Os01g0877450	1.37	1.82	1.67	0.79	0.47	0.85	1.62	0.703333	-1.20371	0.00424935	0.0249011	Down	--
Os09g0482681	1.31	1.44	1.5	0.88	0.44	0.52	1.41667	0.613333	-1.20776	0.00130504	0.00947445	Down	--
Os09g0427125	3.31	2.5	2.73	1.33	1.09	1.27	2.84667	1.23	-1.21062	0.000313693	0.00289797	Down	expressed protein
MSTRG.200	1.46	0.97	1.14	0.47	0.75	0.32	1.19	0.513333	-1.21299	0.00781944	0.0403121	Down	--
Os05g0579600	33.94	24.96	20.54	8.03	11.88	14.31	26.48	11.4067	-1.21503	2.58489e-06	4.78938e-05	Down	MYB family transcription factor putative expressed
Os01g0555100	11.54	7.3	8.18	4.05	4.48	3.08	9.00667	3.87	-1.21866	2.08824e-06	3.98107e-05	Down	zinc finger family protein putative expressed
Os02g0758000	20.1	21.2	25.71	5.81	9.44	13.54	22.3367	9.59667	-1.21881	9.08285e-06	0.000140602	Down	heat shock 22 kDa protein mitochondrial precursor putative expressed
Os03g0119700	2.03	1.46	2.03	0.65	0.86	0.86	1.84	0.79	-1.21978	6.17415e-06	0.000100411	Down	PPR repeat domain containing protein putative expressed
Os06g0696500	2.32	2.63	3.01	1.79	0.65	0.97	2.65333	1.13667	-1.223	0.00404561	0.0239205	Down	glycosyl hydrolases family 16 putative expressed
Os03g0107300	2.56	1.69	3.08	0.51	1.66	0.97	2.44333	1.04667	-1.22305	0.00421799	0.0247522	Down	expressed protein
Os01g0854000	32.63	38.39	56.96	16.79	18.82	19.19	42.66	18.2667	-1.22367	1.38116e-09	5.66677e-08	Down	transferase family protein putative expressed
Os09g0488600	1.39	1.72	1.33	0.76	0.29	0.85	1.48	0.633333	-1.22456	0.00800415	0.0410574	Down	expressed protein
Os01g0786000	3.8	4.12	4.35	2.1	1.94	1.21	4.09	1.75	-1.22475	5.06563e-05	0.000617113	Down	ABC transporter conserved site domain containing protein.
Os03g0767650	2.27	3.1	2.77	0.86	1.07	1.55	2.71333	1.16	-1.22594	8.75848e-05	0.000988432	Down	--
Os02g0617400	15.83	16.72	12.74	6.45	7.35	5.56	15.0967	6.45333	-1.22611	1.26577e-12	8.71177e-11	Down	GDSL-like lipase Facylhydrolase putative expressed
Os01g0914300	47.33	53.67	47.27	12.64	23.17	27.51	49.4233	21.1067	-1.22749	6.93804e-07	1.51331e-05	Down	LTPL39 - Protease inhibitor Fseed storage FLTP family protein precursor expressed
Os07g0469100	272.17	261.59	253.49	78.94	131.29	125.55	262.417	111.927	-1.22931	1.2037e-11	7.1413e-10	Down	expressed protein
Os04g0128900	3.3	2.53	1.98	1.27	0.89	1.17	2.60333	1.11	-1.2298	1.59744e-05	0.000229474	Down	flavin monooxygenase putative expressed
Os05g0399400	348.56	234.15	545.25	167.5	206.17	107.14	375.987	160.27	-1.23018	0.00466539	0.026831	Down	CHIT5 - Chitinase family protein precursor expressed
MSTRG.5526	5.73	12.35	4.28	1.75	3.41	4.37	7.45333	3.17667	-1.23037	0.00202196	0.0136255	Down	Metal transporter Nramp5 [Morus notabilis]
Os01g0117300	18.85	16.34	16.23	6.19	8.44	7.27	17.14	7.3	-1.2314	2.96943e-14	2.56808e-12	Down	protein kinase domain containing protein expressed
Os04g0121100	46.15	50.38	50.16	22.89	21.92	17.56	48.8967	20.79	-1.23385	4.73535e-22	9.35071e-20	Down	OsSub34 - Putative Subtilisin homologue expressed
Os03g0574600	28.87	16.87	20.24	11.02	9.12	7.91	21.9933	9.35	-1.23403	5.3637e-07	1.20812e-05	Down	expressed protein
Os10g0531900	1.38	1.11	0.71	0.32	0.41	0.63	1.06667	0.453333	-1.23447	0.00849618	0.0430748	Down	bZIP family transcription factor putative expressed
Os01g0212900	1.43	2.14	1.42	0.98	0.54	0.6	1.66333	0.706667	-1.23498	0.00477088	0.0272948	Down	--
Os05g0191700	21.44	30.9	22.99	9.48	8.34	14.12	25.11	10.6467	-1.23786	9.56492e-08	2.61025e-06	Down	HAD superfamily phosphatase putative expressed
MSTRG.10851	1.27	1.45	1.03	0.24	0.6	0.75	1.25	0.53	-1.23786	0.00675302	0.0360291	Down	PREDICTED: probable serine/threonine-protein kinase At1g54610 [Oryza sativa Japonica Group]
Os09g0451266	29.65	35.68	39.23	15.19	15.55	13.54	34.8533	14.76	-1.2396	1.8143e-17	2.18777e-15	Down	--
Os01g0232200	2.29	3.54	1.92	0.97	0.84	1.47	2.58333	1.09333	-1.2405	0.000464542	0.00398962	Down	WD domain G-beta repeat domain containing protein expressed
Os08g0503000	113.9	79.64	133.09	33.02	48.52	56.66	108.877	46.0667	-1.2409	9.48141e-08	2.59462e-06	Down	skin secretory protein xP2 precursor putative expressed
Os10g0508000	29.8	31.15	24.52	13.25	10.89	11.96	28.49	12.0333	-1.24342	4.04265e-21	7.48084e-19	Down	monocopper oxidase putative expressed
MSTRG.33257	12.48	14.21	14.3	3.41	8.32	5.56	13.6633	5.76333	-1.24533	7.67803e-05	0.000881617	Down	PREDICTED: probable receptor-like protein kinase At5g15080 [Oryza sativa Japonica Group]
Os10g0190100	1.9	3.31	1.93	0.95	0.85	1.21	2.38	1.00333	-1.24616	0.000536756	0.00452468	Down	sulfotransferase domain containing protein expressed
Os03g0143100	1.67	1.88	1.6	0.79	0.51	0.87	1.71667	0.723333	-1.24688	1.5717e-05	0.000226435	Down	OsSub26 - Putative Subtilisin homologue expressed
Os04g0644400	492.61	675.26	632.58	253.39	254.03	250.01	600.15	252.477	-1.24917	4.73359e-22	9.35071e-20	Down	LTPL125 - Protease inhibitor Fseed storage FLTP family protein precursor putative expressed
Os02g0762200	5.38	5.2	3.85	2	1.76	2.31	4.81	2.02333	-1.2493	2.99554e-07	7.28955e-06	Down	zinc knuckle domain containing protein expressed
Os06g0695451	2.16	3.69	3.07	1.44	1.54	0.77	2.97333	1.25	-1.25015	0.000776418	0.00614505	Down	--
Os04g0495400	48.68	48.61	50.24	23.96	18.19	19.87	49.1767	20.6733	-1.2502	4.07661e-23	9.0826e-21	Down	expressed protein
Os06g0642500	1.4	1.54	1.32	0.6	0.6	0.59	1.42	0.596667	-1.25089	5.20487e-06	8.68376e-05	Down	cytochrome P450 71D6 putative expressed
Os03g0758700	1.16	1.1	1.17	0.34	0.39	0.71	1.14333	0.48	-1.25214	0.00184191	0.0126407	Down	transducin family protein putative expressed
Os02g0813600	9.84	8.84	5.29	1.74	4	4.31	7.99	3.35	-1.25403	0.000302329	0.00281138	Down	3-ketoacyl-CoA synthase putative expressed
Os03g0392600	4.66	7.25	6.09	2.29	2.18	3.07	6	2.51333	-1.25536	2.5014e-07	6.19896e-06	Down	OsSCP14 - Putative Serine Carboxypeptidase homologue expressed
Os06g0220100	10.9	11.29	15.27	4.08	5.5	6.1	12.4867	5.22667	-1.25643	1.13086e-07	3.03035e-06	Down	--
Os05g0586400	10.65	13.06	11.16	5.41	4.46	4.72	11.6233	4.86333	-1.25701	9.22715e-20	1.43306e-17	Down	extra-large G-protein-related putative expressed
MSTRG.25488	3.04	2.96	4.83	0.98	2.11	1.44	3.61	1.51	-1.25745	0.000683688	0.00551112	Down	--
Os09g0128400	4.63	3.06	4.06	2.08	1.44	1.39	3.91667	1.63667	-1.25887	1.23137e-06	2.48825e-05	Down	expressed protein
Os01g0176400	7.23	9.06	7.12	2.22	4.25	3.31	7.80333	3.26	-1.25922	7.14515e-06	0.000113831	Down	phototropic-responsive NPH3 family protein putative expressed
Os12g0530100	22.86	37.06	28.01	8.48	12.3	15.93	29.31	12.2367	-1.26018	3.54147e-07	8.40434e-06	Down	peroxidase precursor putative expressed
MSTRG.17572	14.03	12.75	14.46	4.52	6.07	6.62	13.7467	5.73667	-1.2608	2.15131e-08	6.83258e-07	Down	--
Os01g0296450	12.46	12.42	11.2	4.87	5.4	4.77	12.0267	5.01333	-1.26239	2.26435e-25	6.45862e-23	Down	--
Os03g0328300	2.6	3.84	1.84	0.61	1.12	1.72	2.76	1.15	-1.26303	0.00579183	0.0318341	Down	emp24 Fgp25L Fp24 family protein putative expressed
Os03g0195300	13.9	16.62	15.78	6.98	6	6.3	15.4333	6.42667	-1.26391	7.24026e-23	1.5677e-20	Down	sulfate transporter putative expressed
Os11g0427800	18.91	16.37	19.33	5.32	10.02	7.4	18.2033	7.58	-1.26393	1.2305e-07	3.25615e-06	Down	LTPL10 - Protease inhibitor Fseed storage FLTP family protein precursor expressed
Os02g0705500	17.5	18.4	19.74	7.87	6.62	8.6	18.5467	7.69667	-1.26885	9.34027e-18	1.17402e-15	Down	basic helix-loop-helix putative expressed
Os02g0533700	1.57	1.69	2.31	0.69	0.67	0.95	1.85667	0.77	-1.26978	0.000790428	0.00622438	Down	expressed protein
Os11g0214900	2.62	4.13	2.26	1.06	1.37	1.3	3.00333	1.24333	-1.27235	0.000971782	0.00740291	Down	dirigent putative expressed
Os09g0457100	9.04	7.51	8.09	3.63	3.43	3.13	8.21333	3.39667	-1.27385	4.05457e-16	4.26506e-14	Down	cytochrome P450 putative expressed
Os08g0285600	3.32	3.36	3.07	1.48	1.24	1.31	3.25	1.34333	-1.27462	2.28554e-14	1.98822e-12	Down	protein kinase domain containing protein expressed
Os02g0635800	8.28	7.4	3.06	1.32	1.91	4.5	6.24667	2.57667	-1.27758	0.00825689	0.0420846	Down	TCP family transcription factor putative expressed
Os03g0226300	3.95	5.2	4.76	2.08	2.09	1.56	4.63667	1.91	-1.27952	3.49043e-09	1.30314e-07	Down	STRUBBELIG-RECEPTOR FAMILY 7 precursor putative expressed
Os10g0531700	6.44	8.35	6.88	3.86	2.03	3.03	7.22333	2.97333	-1.28058	1.17355e-07	3.12217e-06	Down	leucine-rich repeat transmembrane protein kinase putative expressed
Os01g0814100	64.02	77.25	44.94	24.34	23.14	29.06	62.07	25.5133	-1.28264	3.75779e-11	2.0491e-09	Down	LTPL65 - Protease inhibitor Fseed storage FLTP family protein precursor expressed
Os06g0271400	2.14	2.08	2.4	0.81	0.95	0.96	2.20667	0.906667	-1.28322	2.28881e-05	0.000311589	Down	expressed protein
Os08g0502400	21.64	28.23	14.84	7.13	6.55	12.9	21.57	8.86	-1.28365	1.7964e-05	0.000254846	Down	fasciclin domain containing protein expressed
Os02g0773600	2.37	2.18	2.02	1.09	0.95	0.65	2.19	0.896667	-1.28829	0.000508036	0.00430951	Down	expressed protein
Os05g0160800	4.17	3.32	2.71	1.59	1.22	1.36	3.4	1.39	-1.29045	1.73372e-07	4.44718e-06	Down	POLE2A - Putative DNA polymerase epsilon complex subunit expressed
Os11g0145200	15.86	15.9	14.63	5.99	5.81	7.16	15.4633	6.32	-1.29085	4.78e-21	8.69901e-19	Down	anthocyanin 5-O-glucosyltransferase putative expressed
Os03g0609500	38.35	38.83	36.68	12.61	16.71	17.2	37.9533	15.5067	-1.29134	8.04217e-19	1.12001e-16	Down	DUF260 domain containing protein putative expressed
MSTRG.6990	4.12	3.88	4.18	1.78	1.77	1.41	4.06	1.65333	-1.2961	3.41613e-12	2.20776e-10	Down	--
Os09g0456100	18.1	18.91	17.82	8.58	6.72	7.01	18.2767	7.43667	-1.29727	7.06692e-24	1.67706e-21	Down	remorin C-terminal domain containing protein putative expressed
Os05g0475475	2.79	2.53	2.18	0.42	1.59	1.04	2.5	1.01667	-1.29808	0.00358184	0.0216487	Down	VHS and GAT domain containing protein expressed
Os02g0658200	6.85	11.65	13.57	3.81	3.76	5.44	10.69	4.33667	-1.3016	2.66664e-05	0.000355201	Down	zinc finger protein putative expressed
Os03g0680700	2.16	2.27	2.03	0.65	0.91	1.06	2.15333	0.873333	-1.30197	0.000146417	0.00152772	Down	homeobox domain containing protein expressed
Os01g0872900	2.43	3.15	2.46	0.83	1.11	1.32	2.68	1.08667	-1.30232	7.2948e-06	0.000115842	Down	transposon protein putative Pong sub-class expressed
Os09g0455300	3.01	2.88	5.48	1.31	0.72	2.58	3.79	1.53667	-1.30239	0.0055989	0.0310151	Down	bHelix-loop-helix transcription factor putative expressed
Os05g0491000	9.25	10.88	7.35	1.63	4.16	5.32	9.16	3.70333	-1.30652	0.00103616	0.00782904	Down	OsCML9 - Calmodulin-related calcium sensor protein expressed
Os03g0699100	2.37	2.47	1.6	1.27	0.46	0.87	2.14667	0.866667	-1.30855	0.00635718	0.0343472	Down	WD domain G-beta repeat domain containing protein expressed
Os08g0137400	27.89	19.34	27.67	6.82	12.3	11.02	24.9667	10.0467	-1.31329	1.56094e-07	4.0551e-06	Down	plastocyanin-like domain containing protein putative expressed
Os06g0294200	0.39	0.42	0.41	0.18	0.18	0.13	0.406667	0.163333	-1.31603	0.00294214	0.0184554	Down	cadmium tolerance factor putative expressed
MSTRG.16444	6.87	8.21	8.03	3.04	3.5	2.74	7.70333	3.09333	-1.31632	8.39201e-14	6.80165e-12	Down	--
Os11g0118400	3.12	4.17	4.05	1.93	1.55	1.07	3.78	1.51667	-1.31748	6.51641e-06	0.000105457	Down	--
Os07g0173850	3.25	2.74	2.65	0.8	1.6	1.06	2.88	1.15333	-1.32026	0.00139212	0.00999269	Down	--
Os04g0686800	3.19	2.1	2.93	0.42	1.43	1.44	2.74	1.09667	-1.32105	0.00565436	0.0312421	Down	integral membrane protein putative expressed
Os10g0403800	3.33	4.11	5.57	2.1	1.28	1.79	4.33667	1.72333	-1.33138	6.08648e-05	0.000719893	Down	bHLH family protein putative expressed
MSTRG.16443	2.12	2.21	1.61	0.63	0.8	0.93	1.98	0.786667	-1.33168	1.80679e-09	7.21352e-08	Down	--
Os03g0304500	17.77	16.97	14.25	6.92	5.85	6.64	16.33	6.47	-1.33569	2.14804e-23	4.9395e-21	Down	DNAJ heat shock N-terminal domain-containing protein putative expressed
Os03g0162650	0.85	1.48	1.86	0.64	0.34	0.68	1.39667	0.553333	-1.33577	0.00333476	0.0204385	Down	3-ketoacyl-CoA synthase putative expressed
Os01g0873000	6.49	10.22	6.32	3.86	3.27	1.99	7.67667	3.04	-1.33641	0.000133998	0.00141911	Down	--
Os10g0356000	10.19	27.1	12.8	4.19	7.37	8.24	16.6967	6.6	-1.33902	0.000182638	0.00183778	Down	ribulose bisphosphate carboxylase large chain precursor putative expressed
Os04g0580500	1.2	2.16	1.07	0.37	0.85	0.53	1.47667	0.583333	-1.33995	0.00700605	0.0371121	Down	expressed protein
Os05g0551700	0.65	0.67	0.68	0.28	0.18	0.33	0.666667	0.263333	-1.34008	0.00347299	0.0210767	Down	IPP transferase putative expressed
Os06g0559600	0.69	0.8	0.92	0.29	0.34	0.32	0.803333	0.316667	-1.34303	1.61778e-07	4.18779e-06	Down	hypothetical protein
Os04g0457300	1.87	2.26	1.18	0.6	0.73	0.76	1.77	0.696667	-1.34521	0.000252508	0.00242173	Down	nodulin putative expressed
Os06g0247000	7.55	6.74	6.19	2.22	1.67	4.17	6.82667	2.68667	-1.34536	0.000145608	0.00152196	Down	glycosyl transferase 8 domain containing protein putative expressed
Os12g0163750	8.33	8.85	11.8	4.12	4.91	2.37	9.66	3.8	-1.34602	0.000136378	0.00144019	Down	--
Os06g0671800	22.93	19.22	17.75	8.5	7.04	8.02	19.9667	7.85333	-1.34622	1.55672e-22	3.29848e-20	Down	patellin-5 putative expressed
Os11g0523700	20.61	21.52	16.69	8.23	6.73	8.17	19.6067	7.71	-1.34654	7.63943e-20	1.19903e-17	Down	inducer of CBF expression 1 putative expressed
Os05g0272200	1.63	2.1	1.75	0.94	0.83	0.38	1.82667	0.716667	-1.34984	0.000890435	0.00688938	Down	expressed protein
Os07g0147600	5.01	4.73	4.61	1.34	2.16	2.12	4.78333	1.87333	-1.35241	2.54503e-10	1.21571e-08	Down	TKL_IRAK_CrRLK1L-1.15 - The CrRLK1L-1 subfamily has homology to the CrRLK1L homolog expressed
Os09g0447300	0.71	0.56	0.8	0.29	0.33	0.19	0.69	0.27	-1.35364	0.00310536	0.0192754	Down	cytochrome P450 putative expressed
Os09g0451400	30.47	36.45	43.64	14.95	14.08	14.23	36.8533	14.42	-1.35372	3.85124e-18	5.03274e-16	Down	1-aminocyclopropane-1-carboxylate oxidase protein putative expressed
Os08g0469500	3.87	3.41	2.17	1.57	0.84	1.28	3.15	1.23	-1.35669	6.9203e-05	0.000803459	Down	F-box protein putative expressed
Os01g0791033	20.32	56.69	22.85	8.53	13.67	16.76	33.2867	12.9867	-1.35791	0.000262475	0.00250034	Down	Similar to ribulose-1,5-bisphosphate carboxylase/oxygenase large subunit. (Os01t0791033-00)
Os08g0562500	69.38	63.16	61.19	27.22	26.62	21.67	64.5767	25.17	-1.35931	1.09298e-28	3.8598e-26	Down	transferase family protein putative expressed
Os02g0168400	12.75	12.89	11.79	6.78	3.95	3.85	12.4767	4.86	-1.3602	1.94971e-09	7.691e-08	Down	expressed protein
Os03g0684700	45.36	52.99	48.62	20.78	20.51	15.88	48.99	19.0567	-1.36219	1.24281e-21	2.3482e-19	Down	integral membrane HPP family protein putative expressed
Os06g0184200	1.3	0.65	0.65	0.39	0.24	0.38	0.866667	0.336667	-1.36416	0.00873222	0.0440042	Down	transposon protein putative unclassified expressed
Os06g0716100	42.97	55.55	28.27	9.51	13.07	26.65	42.2633	16.41	-1.36483	0.00858515	0.0434294	Down	expressed protein
Os04g0465300	114.75	119.82	104.51	61.88	34.85	34.77	113.027	43.8333	-1.36656	3.99001e-10	1.84361e-08	Down	GASR4 - Gibberellin-regulated GASA FGAST FSnakin family protein precursor expressed
Os12g0549700	5.79	5.76	6.05	0.99	2.91	2.92	5.86667	2.27333	-1.36773	0.000420799	0.0036842	Down	--
Os03g0198600	6.02	4.26	6.27	2.02	2.24	2.15	5.51667	2.13667	-1.36843	1.58089e-08	5.13079e-07	Down	homeobox domain containing protein expressed
Os12g0495525	1.8	2.46	3.59	1.13	0.77	1.14	2.61667	1.01333	-1.36862	0.00164698	0.0115118	Down	--
Os01g0756200	13.76	17.46	13.1	4.45	4.33	8.35	14.7733	5.71	-1.37143	5.43035e-07	1.21692e-05	Down	bZIP transcription factor domain containing protein expressed
Os01g0594300	5.78	4.94	5.2	1.44	1.96	2.75	5.30667	2.05	-1.37218	6.76072e-08	1.91182e-06	Down	retrotransposon protein putative Ty3-gypsy subclass expressed
Os05g0518300	60.64	66.57	55.83	24.99	26.94	18.62	61.0133	23.5167	-1.37544	1.76416e-18	2.3573e-16	Down	GDSL-like lipase Facylhydrolase putative expressed
Os06g0637500	26.35	29.35	30.34	10.78	10.04	12.32	28.68	11.0467	-1.37643	2.36992e-25	6.69537e-23	Down	MYB transcription factor TaMYB1 putative expressed
Os05g0551100	3.63	6.36	4.87	1.68	2.18	1.85	4.95333	1.90333	-1.37987	5.68343e-09	2.03589e-07	Down	expressed protein
Os07g0144500	1.68	2.92	1.55	0.53	0.62	1.21	2.05	0.786667	-1.3818	0.00237289	0.0155179	Down	PLA IIIA FPLP7 putative expressed
Os03g0432277	2.25	3.05	2.6	0.79	1.15	1.09	2.63333	1.01	-1.38253	0.00203222	0.0136853	Down	--
Os01g0357100	442.4	452.64	518.49	165.92	170.81	204.12	471.177	180.283	-1.386	3.66437e-30	1.46892e-27	Down	ferredoxin--nitrite reductase putative expressed
Os05g0344200	115.71	118.19	132.98	61.74	40.55	37.77	122.293	46.6867	-1.38926	2.13642e-13	1.6461e-11	Down	expressed protein
Os04g0472300	25.46	22.69	19.82	10.96	7.24	7.72	22.6567	8.64	-1.39083	4.41331e-14	3.72982e-12	Down	glycerophosphoryl diester phosphodiesterase family protein putative expressed
Os06g0695500	67.81	70.02	64.34	28.36	25.12	23.59	67.39	25.69	-1.39133	4.83244e-40	3.58374e-37	Down	peroxidase precursor putative expressed
Os01g0973100	1.58	1.86	2.39	0.84	0.83	0.55	1.94333	0.74	-1.39294	7.69845e-05	0.000883089	Down	carboxyl-terminal peptidase putative expressed
Os08g0126700	22.27	22.72	22.38	8.37	10	7.23	22.4567	8.53333	-1.39596	3.01702e-23	6.83182e-21	Down	zinc finger family protein putative expressed
Os01g0563700	0.37	0.43	0.28	0.14	0.15	0.12	0.36	0.136667	-1.39734	0.000241444	0.00233296	Down	--
Os12g0616400	4.09	5.92	2.92	2.29	1.17	1.44	4.31	1.63333	-1.39987	0.000104983	0.00115044	Down	transposon protein putative unclassified expressed
Os03g0773000	34.51	27.18	34.74	10.64	13.67	12.04	32.1433	12.1167	-1.40753	9.80292e-20	1.51455e-17	Down	stress-induced protein putative expressed
Os11g0220300	1.17	2.14	1.89	0.52	0.46	0.98	1.73333	0.653333	-1.40766	0.000432998	0.00376781	Down	retrotransposon protein putative unclassified expressed
Os06g0115700	42.91	31.63	16.81	7.6	12.31	14.26	30.45	11.39	-1.41867	1.40792e-05	0.000205335	Down	expressed protein
Os02g0818000	293.4	284.01	361.94	91.02	130.04	130.11	313.117	117.057	-1.41949	4.36176e-17	5.11412e-15	Down	CBS domain containing membrane protein putative expressed
Os10g0163370	2.4	1.65	2	0.72	0.67	0.87	2.01667	0.753333	-1.42061	8.07581e-06	0.000126618	Down	lecithin%3Acholesterol acyltransferase putative expressed
Os12g0158400	7.7	5.48	4.58	1.39	2.33	2.9	5.92	2.20667	-1.42373	9.49081e-06	0.000146252	Down	DUF623 domain containing protein expressed
Os03g0403400	0.53	1.17	0.85	0.41	0.14	0.4	0.85	0.316667	-1.4245	0.00688853	0.036586	Down	WD40-like Beta Propeller Repeat family protein expressed
Os04g0688300	28.03	22.56	28.92	10.72	9.74	9.01	26.5033	9.82333	-1.43189	4.3191e-21	7.90876e-19	Down	peroxidase precursor putative expressed
Os02g0123700	1.97	2.22	1.08	0.52	0.94	0.49	1.75667	0.65	-1.43433	0.000679913	0.00549113	Down	endoglucanase putative expressed
MSTRG.4027	1.37	1.13	1.18	0.65	0.51	0.2	1.22667	0.453333	-1.4361	0.00336928	0.0206075	Down	--
Os07g0133500	14.54	14.57	13.7	5.28	5.22	5.32	14.27	5.27333	-1.4362	1.83461e-37	1.15791e-34	Down	stress-induced protein putative expressed
Os03g0760800	103.69	122.47	103.94	49.79	33.51	38.65	110.033	40.65	-1.43661	1.0717e-18	1.46501e-16	Down	GASR3 - Gibberellin-regulated GASA FGAST FSnakin family protein precursor expressed
Os01g0785900	9.93	9.61	7.1	2.86	3.2	3.78	8.88	3.28	-1.43686	5.73607e-13	4.191e-11	Down	ZOS1-12 - C2H2 zinc finger protein expressed
Os03g0709100	8.84	4.8	3.97	2.7	1.76	2.04	5.87	2.16667	-1.43788	0.000152405	0.00157964	Down	plastocyanin-like domain containing protein putative expressed
Os12g0191500	4.94	6.54	7.84	2.79	2.9	1.43	6.44	2.37333	-1.44015	9.10456e-06	0.000140812	Down	peroxidase precursor putative expressed
Os02g0756800	9.19	7.87	8.54	2.99	2.51	3.9	8.53333	3.13333	-1.44541	2.40092e-11	1.35659e-09	Down	phosphate-induced protein 1 conserved region domain containing protein expressed
Os01g0909300	0.57	0.5	0.81	0.29	0.19	0.21	0.626667	0.23	-1.44606	0.00742454	0.0387476	Down	expressed protein
Os08g0460000	433.4	676.25	624.37	317.16	135.79	182.7	578.007	211.883	-1.44782	0.000382036	0.00340424	Down	Cupin domain containing protein expressed
Os08g0450100	3.22	2.02	2.1	0.96	0.91	0.82	2.44667	0.896667	-1.44817	5.08277e-07	1.15096e-05	Down	pectinesterase putative expressed
Os07g0689800	5.75	6.46	5.65	2.31	2.17	2.06	5.95333	2.18	-1.44937	7.38814e-21	1.32825e-18	Down	DNAJ heat shock N-terminal domain-containing protein putative expressed
Os07g0205900	0.85	0.47	0.57	0.16	0.3	0.23	0.63	0.23	-1.45372	0.00121478	0.00891959	Down	cyclin-related protein putative expressed
Os04g0689300	2.26	3.18	2.73	0.86	1.04	1.08	2.72333	0.993333	-1.45502	1.07294e-07	2.88817e-06	Down	phospholipase C putative expressed
Os04g0381400	1.91	2.28	0.7	0.54	0.38	0.86	1.63	0.593333	-1.45796	0.00851041	0.0431199	Down	hydrolase alpha Fbeta fold family protein putative expressed
Os01g0306100	3.56	2.65	1.39	0.85	0.77	1.14	2.53333	0.92	-1.46133	0.000996445	0.00756167	Down	expressed protein
Os03g0149700	1.24	2.56	1.45	0.43	0.59	0.88	1.75	0.633333	-1.46632	0.00142732	0.0102024	Down	zinc finger C3HC4 type domain containing protein expressed
Os02g0199800	0.57	0.63	0.55	0.26	0.2	0.17	0.583333	0.21	-1.47393	1.53487e-05	0.0002221	Down	GRAM and C2 domains containing protein putative expressed
Os02g0122700	2.11	2.05	1.34	0.72	0.43	0.83	1.83333	0.66	-1.47393	0.00102636	0.00776485	Down	ATXR putative expressed
Os01g0318202	2.45	2.7	2.28	1.01	0.7	0.96	2.47667	0.89	-1.47652	3.18147e-09	1.19918e-07	Down	--
Os11g0671000	638.47	590.08	638.03	214.48	223.4	230.44	622.193	222.773	-1.48179	1.86746e-70	3.46227e-67	Down	auxin-repressed protein putative expressed
Os03g0105000	1.82	2.41	1.55	0.27	0.88	0.91	1.92667	0.686667	-1.48843	0.00151045	0.0106986	Down	expressed protein
Os02g0732200	13	12.39	10.71	4.78	3.64	4.37	12.0333	4.26333	-1.49698	1.45902e-22	3.1137e-20	Down	spotted leaf 11 putative expressed
Os02g0208500	76.13	92.05	79.88	28.86	24.7	34.08	82.6867	29.2133	-1.50103	2.65922e-23	6.06794e-21	Down	expressed protein
Os05g0440900	1.54	0.95	1.22	0.39	0.27	0.65	1.23667	0.436667	-1.50185	0.0094883	0.0471617	Down	DUF623 domain containing protein expressed
Os02g0795100	1.5	1.93	1.54	0.96	0.38	0.41	1.65667	0.583333	-1.50589	0.000560435	0.00468567	Down	Eukaryotic transcription factor DNA-binding domain containing protein.
Os10g0555300	2.92	2.82	3.02	0.88	1.4	0.8	2.92	1.02667	-1.508	1.74007e-07	4.45362e-06	Down	ZOS10-07 - C2H2 zinc finger protein expressed
Os06g0295900	2.29	2.13	1.5	0.86	0.57	0.65	1.97333	0.693333	-1.50901	2.73054e-06	5.02163e-05	Down	expressed protein
Os03g0702500	1.03	1.17	1.02	0.61	0.24	0.28	1.07333	0.376667	-1.51074	0.00143108	0.0102269	Down	glucosyltransferase putative expressed
Os03g0797800	27.9	31.38	17.75	9.89	6.96	10.17	25.6767	9.00667	-1.51139	1.49048e-10	7.38124e-09	Down	OsIAA14 - Auxin-responsive Aux FIAA gene family member expressed
Os10g0355800	0.8	2.92	1.34	0.46	0.7	0.61	1.68667	0.59	-1.51539	0.00455588	0.0263647	Down	ATP synthase epsilon chain putative expressed
Os07g0578333	2.67	1.48	2.34	0.8	0.91	0.56	2.16333	0.756667	-1.51553	0.000621013	0.00510297	Down	expressed protein
Os01g0631700	34.16	34.37	29.37	13.43	10.04	10.71	32.6333	11.3933	-1.51816	1.08977e-26	3.40284e-24	Down	serine Fthreonine-protein kinase putative expressed
Os08g0535200	10.82	9.39	8.52	4.33	3.02	2.67	9.57667	3.34	-1.51968	7.34082e-12	4.57728e-10	Down	nodulin MtN3 family protein putative expressed
Os12g0446900	2.61	1.95	2.04	1.05	0.52	0.73	2.2	0.766667	-1.52083	3.36795e-06	5.99475e-05	Down	bifunctional dihydrofolate reductase-thymidylate synthase putative expressed
Os03g0347900	23.95	23.15	20.17	9.38	8.03	6.02	22.4233	7.81	-1.52161	3.29993e-19	4.87011e-17	Down	terpene synthase family metal binding domain containing protein expressed
Os10g0396300	12.75	10.8	10.22	4.08	3.84	3.82	11.2567	3.91333	-1.52431	1.29827e-19	1.9649e-17	Down	mps one binder kinase activator-like 1A putative expressed
Os08g0199400	3.77	2.26	1.94	0.76	0.81	1.2	2.65667	0.923333	-1.52469	2.61892e-05	0.000350102	Down	acyl-desaturase chloroplast precursor putative expressed
Os05g0376600	1.25	1.6	1.13	0.66	0.19	0.53	1.32667	0.46	-1.5281	0.000787093	0.00620777	Down	acetyltransferase GNAT family putative expressed
Os06g0659100	2.44	4	1.78	0.48	1.39	0.98	2.74	0.95	-1.52818	0.000652168	0.00530226	Down	OsSPL10 - SBP-box gene family member expressed
Os07g0277200	4.94	5.51	13.29	3.71	2.28	2.24	7.91333	2.74333	-1.52836	0.000354833	0.00320836	Down	expressed protein
Os01g0111100	23.96	23.73	19.57	3.76	10.17	9.28	22.42	7.73667	-1.535	8.52764e-07	1.80688e-05	Down	peptidyl-prolyl cis-trans isomerase putative expressed
Os01g0843700	8.81	3.83	3.66	1.04	3.16	1.42	5.43333	1.87333	-1.53623	0.00321593	0.01985	Down	peptidase aspartic family protein putative expressed
Os07g0568700	111.51	96.72	91.15	31.41	30.45	41.31	99.7933	34.39	-1.53695	2.53199e-25	7.01953e-23	Down	polygalacturonase inhibitor 1 precursor putative expressed
Os05g0180300	26.16	27.81	22.48	8.46	9.48	8.25	25.4833	8.73	-1.5455	7.41222e-35	3.99775e-32	Down	uncharacterized protein At4g06744 precursor putative expressed
Os04g0364800	16.77	19.98	24.44	6.48	7.84	6.63	20.3967	6.98333	-1.54635	5.65078e-13	4.13977e-11	Down	RIPER2 - Ripening-related family protein precursor expressed
Os02g0240300	2.82	2.23	2.6	0.75	1.29	0.57	2.55	0.87	-1.55141	4.05778e-05	0.000510042	Down	peroxidase precursor putative expressed
Os06g0640599	19.62	19.94	18.77	8.3	7.96	3.64	19.4433	6.63333	-1.55147	2.19242e-07	5.4929e-06	Down	--
Os05g0178300	120.32	149.05	149.45	64.54	39.98	38.35	139.607	47.6233	-1.55163	1.10659e-13	8.82414e-12	Down	expressed protein
Os04g0583200	11.29	9.52	10.26	3.87	3.23	3.46	10.3567	3.52	-1.55691	1.41178e-17	1.73053e-15	Down	expressed protein
Os10g0524600	31.5	27.51	34.46	9.42	11.9	10.37	31.1567	10.5633	-1.56048	4.3916e-28	1.48037e-25	Down	OsSub61 - Putative Subtilisin homologue expressed
Os01g0313300	4.18	3.67	2.92	0.7	1.34	1.6	3.59	1.21333	-1.56501	3.64057e-05	0.000464289	Down	AP2 domain containing protein expressed
Os11g0505300	3.66	2.83	4.27	1.55	0.96	1.12	3.58667	1.21	-1.56764	4.22449e-07	9.77499e-06	Down	sulfotransferase domain containing protein expressed
Os02g0696500	85.07	80.23	69.91	23.84	23.96	31.52	78.4033	26.44	-1.56819	1.13445e-26	3.50545e-24	Down	glycosyl hydrolases family 16 putative expressed
Os08g0444500	10.44	15.17	10.11	2.24	4.2	5.57	11.9067	4.00333	-1.5725	3.17004e-06	5.69226e-05	Down	expressed protein
Os02g0321600	10.47	14.47	12.87	5.26	4.02	3.36	12.6033	4.21333	-1.58077	3.14967e-11	1.73988e-09	Down	expressed protein
Os05g0586050	16.83	18.04	16.2	5.04	6.64	5.35	17.0233	5.67667	-1.5844	1.99809e-24	5.11963e-22	Down	expressed protein
Os01g0720500	1296.46	1124.73	1085.05	441.5	349.53	377.75	1168.75	389.593	-1.58492	1.06057e-38	7.67335e-36	Down	chlorophyll A-B binding protein putative expressed
Os07g0159700	3.77	5.14	2.02	1.06	0.6	1.98	3.64333	1.21333	-1.58628	0.00147999	0.0105055	Down	receptor protein kinase CRINKLY4 precursor putative expressed
Os01g0929200	7.23	8.31	7.81	2.64	2.13	2.98	7.78333	2.58333	-1.59115	4.93409e-18	6.39148e-16	Down	protein kinase putative expressed
Os06g0219900	1.21	0.91	0.58	0.15	0.25	0.49	0.9	0.296667	-1.60108	0.00861184	0.0435347	Down	phosphate-induced protein 1 conserved region domain containing protein expressed
Os04g0196200	1.39	0.5	0.51	0.18	0.32	0.29	0.8	0.263333	-1.60311	0.007288	0.0381963	Down	O-methyltransferase putative expressed
Os01g0387133	2.72	2.01	1.72	0.68	1.12	0.32	2.15	0.706667	-1.60523	0.00507527	0.0286331	Down	--
Os03g0706500	1.29	0.28	1.02	0.2	0.34	0.31	0.863333	0.283333	-1.60742	0.00821134	0.0418956	Down	TCP family transcription factor putative expressed
Os11g0671100	29.34	29.9	32.39	10.77	10.9	8.35	30.5433	10.0067	-1.6099	2.59628e-25	7.13113e-23	Down	--
Os06g0582600	16.11	12.53	11.97	3.66	5.68	3.94	13.5367	4.42667	-1.61258	1.98238e-13	1.53538e-11	Down	vignain precursor putative expressed
Os03g0245300	13.27	9.23	8.18	2.83	4.07	3.13	10.2267	3.34333	-1.61298	2.76994e-10	1.31468e-08	Down	POEI16 - Pollen Ole e I allergen and extensin family protein precursor expressed
Os01g0117200	13.64	13.77	14.38	4.12	5.35	4.19	13.93	4.55333	-1.6132	2.13822e-28	7.29061e-26	Down	TAK33 putative expressed
Os09g0241550	2.01	1.5	0.84	0.62	0.41	0.39	1.45	0.473333	-1.61512	0.00157894	0.0111016	Down	OsFBX307 - F-box domain containing protein expressed
Os12g0210500	4.94	4.58	3.79	1	1.18	2.16	4.43667	1.44667	-1.61674	3.82646e-06	6.6729e-05	Down	ARGOS putative expressed
Os03g0371800	7.03	11.21	7.33	4.02	1.83	2.44	8.52333	2.76333	-1.62501	4.54399e-07	1.04491e-05	Down	myb-like DNA-binding domain containing protein putative expressed
Os05g0585800	0.86	1.26	0.54	0.24	0.25	0.37	0.886667	0.286667	-1.62902	0.000408039	0.00359403	Down	protein kinase family protein putative expressed
Os03g0119100	1.01	1.13	1.08	0.36	0.32	0.36	1.07333	0.346667	-1.63048	2.86116e-08	8.78608e-07	Down	phospholipase D putative expressed
Os06g0208100	23.52	25.85	19.68	7.99	6.94	7.36	23.0167	7.43	-1.63124	1.78297e-16	1.95889e-14	Down	homeobox and START domains containing protein putative expressed
Os08g0421000	0.13	0.1	0.08	0.04	0.02	0.04	0.103333	0.0333333	-1.63227	0.00706752	0.0373244	Down	expressed protein
Os02g0826300	8.33	6.46	6.42	2.05	2.31	2.45	7.07	2.27	-1.63902	3.14546e-11	1.73988e-09	Down	expressed protein
Os12g0163700	12.22	10.86	11.17	4.39	4.02	2.58	11.4167	3.66333	-1.63991	5.6291e-14	4.62553e-12	Down	actin putative expressed
Os04g0142850	1.17	1.11	1.18	0.52	0.18	0.41	1.15333	0.37	-1.64021	0.000325615	0.00299484	Down	--
Os11g0644100	4.84	4.98	3.82	0.61	1.97	1.79	4.54667	1.45667	-1.64214	4.58927e-05	0.000566762	Down	leucine-rich repeat family protein putative expressed
Os01g0880800	3.13	2.24	1.52	0.36	0.36	1.47	2.29667	0.73	-1.65357	0.00465279	0.0267741	Down	acyl-desaturase chloroplast precursor putative expressed
Os03g0320800	17.75	21.39	16.74	7.18	5.32	5.16	18.6267	5.88667	-1.66185	1.36306e-22	2.92999e-20	Down	expressed protein
Os03g0434800	4.75	4.79	7.79	1.89	1.94	1.6	5.77667	1.81	-1.67425	2.4234e-09	9.34822e-08	Down	peroxidase precursor putative expressed
Os05g0188700	10.76	10.61	10.24	2.83	3.31	3.76	10.5367	3.3	-1.67488	2.10151e-26	6.29688e-24	Down	uncharacterized protein At4g06744 precursor putative expressed
Os07g0632000	0.98	0.58	0.42	0.17	0.21	0.24	0.66	0.206667	-1.67516	0.00744925	0.0388341	Down	glycosyl hydrolase putative expressed
Os02g0505500	5.32	4.46	4.49	1.61	1.64	1.2	4.75667	1.48333	-1.68111	6.61145e-11	3.45285e-09	Down	expressed protein
MSTRG.18502	11.24	24.07	8.47	3.01	5.74	4.9	14.5933	4.55	-1.68137	0.00141882	0.0101497	Down	cell wall-associated hydrolase [Phaseolus vulgaris]
Os01g0864000	7.19	5.02	4.68	2.06	1.82	1.38	5.63	1.75333	-1.68303	8.6948e-10	3.70046e-08	Down	DUF623 domain containing protein expressed
Os12g0459100	14.24	16.15	12.15	4.86	5.79	2.47	14.18	4.37333	-1.69705	3.21908e-09	1.21028e-07	Down	10-deacetylbaccatin III 10-O-acetyltransferase putative expressed
Os10g0166600	7.74	5.9	7.31	2.08	1.76	2.59	6.98333	2.14333	-1.70406	7.05754e-15	6.56285e-13	Down	cytochrome P450 putative expressed
Os10g0557600	5.83	4.86	6.75	0.56	1.61	3.16	5.81333	1.77667	-1.71019	0.000724847	0.00578941	Down	GATA zinc finger domain containing protein expressed
Os01g0251400	382.81	406.36	163.73	56.63	74.59	159.04	317.633	96.7533	-1.71498	0.00292003	0.0183517	Down	MFS18 protein precursor putative expressed
MSTRG.20145	5.65	6.33	3.03	1.39	2.44	0.73	5.00333	1.52	-1.71882	0.000239291	0.00231442	Down	--
Os06g0652200	6.31	7.01	2.88	0.66	2.34	1.92	5.4	1.64	-1.71926	0.000402208	0.00355728	Down	haemolysin-III putative expressed
Os12g0604500	2.35	2.22	0.9	0.18	0.94	0.54	1.82333	0.553333	-1.72036	0.00478874	0.0273705	Down	IQ calmodulin-binding motif family protein putative expressed
Os01g0177400	1.85	2.36	1.35	0.5	0.62	0.56	1.85333	0.56	-1.72662	1.17173e-05	0.000175849	Down	gibberellin 3-beta-dioxygenase 2-2 putative expressed
Os02g0803900	0.84	0.83	1.05	0.27	0.17	0.38	0.906667	0.273333	-1.72991	0.000120864	0.00130307	Down	anthocyanidin 3-O-glucosyltransferase putative expressed
Os06g0109801	1.09	0.78	0.7	0.28	0.1	0.39	0.856667	0.256667	-1.73884	0.00191743	0.0130396	Down	Similar to cDNA clone:002-149-F01 full insert sequence.
Os10g0150300	95.05	96.36	74.68	33.23	22.38	24.11	88.6967	26.5733	-1.7389	6.44006e-23	1.41239e-20	Down	POEI11 - Pollen Ole e I allergen and extensin family protein precursor expressed
Os03g0258900	4.57	6.8	5.76	2.82	0.85	1.44	5.71	1.70333	-1.74513	5.4904e-06	9.114e-05	Down	glyoxal oxidase-related putative expressed
Os02g0247100	1.66	1.74	2	0.28	0.49	0.84	1.8	0.536667	-1.7459	0.000374916	0.00335064	Down	bZIP transcription factor family protein putative expressed
Os07g0107000	1.74	2.06	3.65	0.66	0.91	0.65	2.48333	0.74	-1.74668	0.00014395	0.00150835	Down	--
Os06g0226500	3.13	4.5	4.86	1.16	1.33	1.22	4.16333	1.23667	-1.75128	5.01361e-08	1.4696e-06	Down	helix-loop-helix DNA-binding domain containing protein expressed
Os12g0264800	0.65	1.02	0.89	0.38	0.28	0.1	0.853333	0.253333	-1.75207	0.0056743	0.0313333	Down	expressed protein
Os06g0220000	59.8	58.36	64.32	6.27	20.99	26.91	60.8267	18.0567	-1.75217	0.00210101	0.0140782	Down	phosphate-induced protein 1 conserved region domain containing protein expressed
Os01g0740350	5.84	6.02	5.82	0.88	2.46	1.88	5.89333	1.74	-1.76	1.77565e-07	4.52129e-06	Down	--
Os11g0285000	5.09	3.52	3.48	1.52	1.17	0.87	4.03	1.18667	-1.76387	8.114e-11	4.17147e-09	Down	cycloartenol synthase putative expressed
Os01g0303800	17.8	17.15	20.39	5.78	4.07	6.37	18.4467	5.40667	-1.77055	4.9319e-18	6.39148e-16	Down	universal stress protein domain containing protein putative expressed
Os12g0199000	1.48	0.91	0.96	0.33	0.28	0.37	1.11667	0.326667	-1.77331	0.000157738	0.00162414	Down	dirigent putative expressed
Os08g0353700	0.9	0.78	1.07	0.18	0.27	0.34	0.916667	0.263333	-1.79951	0.00598636	0.0327396	Down	expressed protein
Os04g0201500	1.9	2.85	2.2	0.68	0.68	0.62	2.31667	0.66	-1.81151	3.07115e-06	5.53815e-05	Down	amino acid transporter protein putative expressed
Os09g0570800	0.53	1.13	0.8	0.2	0.15	0.35	0.82	0.233333	-1.81323	0.00211049	0.0141242	Down	1-aminocyclopropane-1-carboxylate oxidase putative expressed
Os12g0599800	2.26	2.18	1.46	0.31	0.49	0.87	1.96667	0.556667	-1.82087	0.000202387	0.00200655	Down	expressed protein
Os06g0336500	0.27	0.19	0.11	0.05	0.05	0.06	0.19	0.0533333	-1.83289	0.00659734	0.0353702	Down	CSLD5 - cellulose synthase-like family D expressed
Os04g0535200	14.72	14.78	8.54	2.03	4.32	4.29	12.68	3.54667	-1.83802	2.94877e-09	1.11714e-07	Down	aspartyl protease family protein putative expressed
Os03g0281300	0.2	0.42	0.31	0.11	0.08	0.07	0.31	0.0866667	-1.83872	0.00345003	0.0209802	Down	expressed protein
Os04g0574500	1.58	0.62	0.77	0.28	0.36	0.18	0.99	0.273333	-1.85677	0.000713588	0.00571179	Down	growth regulating factor protein putative expressed
Os04g0161400	0.8	0.63	0.53	0.15	0.18	0.21	0.653333	0.18	-1.85982	0.00358748	0.0216719	Down	expressed protein
Os11g0567600	0.59	0.62	0.39	0.03	0.15	0.26	0.533333	0.146667	-1.8625	0.0048013	0.0274212	Down	leucine rich repeat protein putative expressed
Os05g0375400	227.25	168.97	120.65	42.14	59.89	39.98	172.29	47.3367	-1.86381	3.15454e-16	3.35399e-14	Down	glycosyl hydrolases family 17 putative expressed
Os07g0590700	261.61	296.66	160.49	36.56	72.21	88.54	239.587	65.77	-1.86505	3.06842e-10	1.4425e-08	Down	retrotransposon protein putative Ty3-gypsy subclass expressed
Os12g0428000	34.22	22.28	32.15	8.89	9.06	6.35	29.55	8.1	-1.86716	1.02199e-18	1.40353e-16	Down	rhodanese-like domain containing protein putative expressed
Os08g0550700	5.3	6.46	7.69	2.59	1.46	1.28	6.48333	1.77667	-1.86756	5.83416e-08	1.68515e-06	Down	OsSAUR36 - Auxin-responsive SAUR gene family member expressed
MSTRG.31447	39.77	53.81	41.01	12.43	9.05	15.39	44.8633	12.29	-1.86805	5.23624e-19	7.50377e-17	Down	PREDICTED: early nodulin-like protein 3 [Oryza sativa Japonica Group]
Os03g0119300	44.3	41	36.43	13.97	10.7	8.62	40.5767	11.0967	-1.87052	1.2393e-25	3.60418e-23	Down	OsSub25 - Putative Subtilisin homologue expressed
Os05g0555600	1.77	1.24	2.04	0.53	0.6	0.25	1.68333	0.46	-1.87162	5.15771e-06	8.61477e-05	Down	glutamate synthase chloroplast precursor putative expressed
Os05g0339300	4.54	4.78	3.84	1.93	0.98	0.66	4.38667	1.19	-1.88216	5.51568e-07	1.23376e-05	Down	expressed protein
Os10g0180800	14.73	17.96	14.02	3.62	4.74	4.31	15.57	4.22333	-1.88231	8.09297e-35	4.28696e-32	Down	OsWAK112d - OsWAK receptor-like protein kinase expressed
MSTRG.9274	0.74	0.74	0.88	0.16	0.14	0.34	0.786667	0.213333	-1.88264	0.00643123	0.0346716	Down	retrotransposon protein, putative, Ty3-gypsy subclass [Oryza sativa Japonica Group]
Os04g0659300	88.85	55.88	26.41	10.01	9.53	26.87	57.0467	15.47	-1.88267	0.00637182	0.0344037	Down	cysteine-rich receptor-like protein kinase putative expressed
Os06g0697000	211.8	200.99	178.94	66.96	41.43	51.82	197.243	53.4033	-1.88497	8.33021e-28	2.71546e-25	Down	glycosyl hydrolases family 16 putative expressed
Os03g0320850	4.77	5.13	5.11	1.67	1.39	0.98	5.00333	1.34667	-1.8935	1.95555e-13	1.51857e-11	Down	--
MSTRG.31663	1.08	1.14	2.03	0.29	0.49	0.36	1.41667	0.38	-1.89843	0.00120854	0.00888887	Down	--
Os06g0559400	2.42	3.1	2.85	0.66	0.74	0.83	2.79	0.743333	-1.90818	5.5131e-10	2.43726e-08	Down	expressed protein
Os07g0124750	3.6	3.54	3.58	0.79	0.89	1.17	3.57333	0.95	-1.91127	1.73296e-17	2.09822e-15	Down	CSLC10 - cellulose synthase-like family C expressed
Os03g0782200	119.58	86.22	83.4	12.26	41.31	23.19	96.4	25.5867	-1.91364	0.000140364	0.00147547	Down	app1 putative expressed
Os06g0696566	0.98	2.03	1.84	0.29	0.31	0.68	1.61667	0.426667	-1.92184	0.00404868	0.0239338	Down	glycosyl hydrolases family 16 putative expressed
Os04g0362375	2.23	2.75	2.51	0.89	0.65	0.43	2.49667	0.656667	-1.92677	1.50407e-05	0.000217855	Down	--
Os02g0285300	133.98	123.83	120.85	36.51	31.03	31.26	126.22	32.9333	-1.93832	5.10394e-73	1.08145e-69	Down	salt stress root protein RS1 putative expressed
Os11g0334938	1.13	1	1.66	0.16	0.3	0.52	1.26333	0.326667	-1.95134	0.00207462	0.0139455	Down	Similar to Class III peroxidase 111. (Os11t0334938-00)
Os06g0147100	106.99	106.58	94.25	15.89	35.13	28.56	102.607	26.5267	-1.95161	1.58024e-15	1.57303e-13	Down	expressed protein
Os06g0194200	1.59	2.76	0.99	0.37	0.28	0.73	1.78	0.46	-1.95217	0.00173834	0.0120313	Down	--
Os01g0222600	70.17	59.95	47.39	11.26	16.61	17.5	59.17	15.1233	-1.96809	1.98623e-20	3.44559e-18	Down	expressed protein
Os06g0207966	10.93	12.43	10.62	2.34	3.25	3.06	11.3267	2.88333	-1.97391	1.26485e-20	2.24674e-18	Down	homeobox and START domains containing protein putative expressed
Os02g0756600	1.55	1.24	1.97	0.2	0.2	0.81	1.58667	0.403333	-1.97595	0.00134273	0.00969588	Down	phosphate-induced protein 1 conserved region domain containing protein expressed
Os01g0740400	1.24	2.82	1.73	0.28	0.32	0.87	1.93	0.49	-1.97775	0.000218715	0.00214195	Down	stress-induced protein putative expressed
Os11g0153100	4.17	1.86	1.53	1.07	0.44	0.4	2.52	0.636667	-1.98481	0.00217722	0.0144724	Down	expressed protein
Os03g0639400	1.21	1.26	1.14	0.06	0.44	0.4	1.20333	0.3	-2.004	0.00357237	0.0216003	Down	plant invertase Fpectin methylesterase inhibitor domain containing protein expressed
Os04g0119000	3.92	2.86	3.78	0.6	0.85	1.18	3.52	0.876667	-2.00548	7.42374e-07	1.60275e-05	Down	expressed protein
Os04g0604300	24.09	24.09	24.06	5.8	6.18	5.84	24.08	5.94	-2.0193	6.09689e-62	8.22083e-59	Down	glycosyl hydrolases family 16 putative expressed
Os02g0640100	2.41	2.41	2.29	1.27	0.15	0.33	2.37	0.583333	-2.02249	0.00199711	0.0134856	Down	expressed protein
Os11g0471300	0.3	0.36	0.16	0.07	0.11	0.02	0.273333	0.0666667	-2.03562	0.00384495	0.0229536	Down	expressed protein
Os05g0299250	0.32	0.22	0.16	0.05	0.06	0.06	0.233333	0.0566667	-2.04182	0.0063579	0.0343472	Down	--
Os08g0371200	12.23	5.34	4.46	0.8	2.58	1.97	7.34333	1.78333	-2.04186	6.12732e-05	0.00072357	Down	transposon protein putative CACTA En FSpm sub-class expressed
Os10g0409400	1	1.76	2.44	0.3	0.15	0.8	1.73333	0.416667	-2.05658	0.00121412	0.00891698	Down	BURP domain containing protein expressed
Os04g0231800	1.08	0.74	0.72	0.16	0.1	0.35	0.846667	0.203333	-2.05795	0.00321001	0.0198296	Down	--
Os01g0863500	4.47	7.86	5.75	1.09	0.54	2.7	6.02667	1.44333	-2.06196	7.75141e-05	0.000888821	Down	--
Os09g0423500	19.06	22.94	14.49	3.63	4.1	5.73	18.83	4.48667	-2.06932	7.11012e-20	1.13395e-17	Down	aspartic proteinase putative expressed
Os02g0676800	0.15	0.38	0.36	0.04	0.07	0.1	0.296667	0.07	-2.08342	0.0093822	0.0466969	Down	AP2 domain containing protein expressed
Os02g0756200	1.7	1.15	1.27	0.04	0.48	0.45	1.37333	0.323333	-2.08659	0.00276684	0.0175488	Down	phosphate-induced protein 1 conserved region domain containing protein expressed
MSTRG.14703	1.95	2.23	2.46	0.81	0.42	0.33	2.21333	0.52	-2.08964	4.39568e-08	1.30394e-06	Down	--
Os09g0524001	2.65	2.62	1.98	0.63	0.57	0.49	2.41667	0.563333	-2.10096	2.16545e-14	1.90047e-12	Down	--
MSTRG.32455	0.47	0.7	0.55	0.15	0.19	0.06	0.573333	0.133333	-2.10434	0.00117042	0.00865169	Down	--
Os04g0631000	0.36	0.98	0.68	0.27	0.12	0.07	0.673333	0.153333	-2.13465	0.00538597	0.0300675	Down	leucoanthocyanidin reductase putative expressed
Os07g0593000	3.72	4.62	2.8	0.95	0.52	1.05	3.71333	0.84	-2.14425	9.29927e-08	2.5542e-06	Down	ZOS7-10 - C2H2 zinc finger protein expressed
Os01g0392600	3.8	0.95	4.39	0.6	0.73	0.72	3.04667	0.683333	-2.15657	7.6186e-06	0.000120274	Down	expressed protein
Os06g0696450	4.52	4.5	4.84	1.19	0.54	1.37	4.62	1.03333	-2.16059	4.35655e-09	1.59744e-07	Down	--
Os08g0452500	6.16	5.04	4.62	0.82	1.42	1.27	5.27333	1.17	-2.17221	1.42119e-12	9.72187e-11	Down	OsSAUR33 - Auxin-responsive SAUR gene family member expressed
Os10g0195600	7.24	10.8	9.51	1.98	1.64	2.4	9.18333	2.00667	-2.19422	6.3477e-24	1.53088e-21	Down	transferase family protein putative expressed
Os06g0698748	30.97	27.85	29.73	5.71	6.86	6.77	29.5167	6.44667	-2.1949	1.05614e-66	1.8429e-63	Down	expressed protein
Os06g0218800	1.74	1.49	2.14	0.21	0.49	0.47	1.79	0.39	-2.19841	5.87838e-06	9.62873e-05	Down	expressed protein
Os02g0570600	0.44	0.34	0.33	0.07	0.05	0.12	0.37	0.08	-2.20945	0.00300501	0.0187823	Down	--
MSTRG.29992	1.64	1.87	1.95	0.32	0.29	0.56	1.82	0.39	-2.22239	3.20753e-05	0.000415675	Down	PREDICTED: LOW QUALITY PROTEIN: peroxisomal (S)-2-hydroxy-acid oxidase GLO4-like [Oryza brachyantha]
Os07g0153150	0.33	0.51	0.15	0.02	0.11	0.08	0.33	0.07	-2.23704	0.00711035	0.0374838	Down	expressed protein
Os12g0438600	76.22	85.87	86.54	18.07	18.54	15.88	82.8767	17.4967	-2.24389	1.20398e-93	3.57149e-90	Down	chloride transporter chloride channel family putative expressed
Os03g0199500	3.53	3.36	3.32	0.43	0.79	0.92	3.40333	0.713333	-2.2543	3.72036e-11	2.03243e-09	Down	expressed protein
Os08g0414500	6.21	8.28	4.62	0.48	1.93	1.58	6.37	1.33	-2.25987	8.11748e-06	0.00012707	Down	expressed protein
Os03g0286500	62.3	53.4	39.61	11.07	8.83	12.51	51.77	10.8033	-2.26064	1.7873e-31	8.03309e-29	Down	RNA recognition motif containing protein putative expressed
Os06g0220600	3.57	2.85	2.61	0.63	0.65	0.58	3.01	0.62	-2.27942	1.06611e-16	1.1934e-14	Down	RNA recognition motif containing protein putative expressed
Os04g0662400	1.09	1.19	1.43	0.23	0.15	0.38	1.23667	0.253333	-2.28735	2.26439e-05	0.000308658	Down	OsSAUR23 - Auxin-responsive SAUR gene family member expressed
Os03g0263600	0.21	0.26	0.27	0.08	0.03	0.04	0.246667	0.05	-2.30256	0.00618848	0.0335726	Down	strictosidine synthase putative expressed
Os01g0757200	15.19	16.51	15.1	2.98	2.3	4.2	15.6	3.16	-2.30355	1.85576e-26	5.61726e-24	Down	gibberellin 2-beta-dioxygenase putative expressed
Os05g0442000	2.73	2.23	2.25	0.54	0.21	0.67	2.40333	0.473333	-2.34411	1.24095e-06	2.5059e-05	Down	expressed protein
MSTRG.9710	5.16	5.37	5.07	1.11	1.2	0.76	5.2	1.02333	-2.34524	6.41529e-30	2.47615e-27	Down	hydroxyproline-rich glycoprotein -like [Oryza sativa Japonica Group]
Os06g0473000	4.64	3.61	4.51	1.1	1.01	0.38	4.25333	0.83	-2.35741	6.61419e-08	1.87934e-06	Down	poor homologous synapsis 1 protein putative expressed
Os04g0453450	1.3	0.43	2.28	0.23	0.34	0.19	1.33667	0.253333	-2.39953	0.000304366	0.0028236	Down	--
Os07g0655800	1.18	0.87	1.51	0.16	0.31	0.2	1.18667	0.223333	-2.40964	2.95621e-05	0.000388882	Down	LTPL2 - Protease inhibitor Fseed storage FLTP family protein precursor expressed
Os08g0352100	2.98	1.11	4.65	0.37	0.54	0.67	2.91333	0.526667	-2.46771	4.33664e-05	0.00053938	Down	expressed protein
MSTRG.26471	0.22	0.54	0.63	0.12	0.05	0.07	0.463333	0.08	-2.53398	0.00862367	0.0435871	Down	--
Os02g0586900	5.39	2	4.21	1.01	0.33	0.6	3.86667	0.646667	-2.58	2.04475e-06	3.91073e-05	Down	glycine-rich cell wall structural protein precursor putative expressed
Os05g0217000	62.66	62.87	55.5	11.61	8.17	10.21	60.3433	9.99667	-2.59368	1.76201e-55	2.01031e-52	Down	expressed protein
MSTRG.2423	1.44	3.06	2.4	0.33	0.68	0.12	2.3	0.376667	-2.61027	0.000177054	0.00179172	Down	alpha/beta-Hydrolases superfamily protein [Zea mays]
Os01g0909400	7.69	8.57	7.61	1.32	1.07	1.45	7.95667	1.28	-2.63602	2.13935e-37	1.32212e-34	Down	expressed protein
Os03g0346200	4.47	4.3	7.69	0.5	0.61	1.53	5.48667	0.88	-2.64035	8.4929e-06	0.000132527	Down	expressed protein
Os07g0462800	0.93	0.46	0.32	0	0.14	0.13	0.57	0.09	-2.66297	0.00653458	0.0351026	Down	O-methyltransferase putative expressed
Os01g0663051	2.76	2.74	2.75	0.54	0	0.75	2.75	0.43	-2.67702	0.0011509	0.00854792	Down	MYB family transcription factor putative expressed
Os01g0368900	15.86	19.84	15.58	3.21	2.84	1.93	17.0933	2.66	-2.68394	8.96534e-30	3.40959e-27	Down	OsGrx_C7 - glutaredoxin subgroup III expressed
Os11g0655900	4.52	3.82	1.4	0.62	0.26	0.62	3.24667	0.5	-2.69896	7.30446e-06	0.000115933	Down	OsGrx_C17 - glutaredoxin subgroup III expressed
Os02g0198000	0.11	0.72	0.34	0.09	0.05	0.04	0.39	0.06	-2.70044	0.00512444	0.0288721	Down	expressed protein
Os12g0538600	4.5	2.16	3.76	0.7	0.71	0.19	3.47333	0.533333	-2.70321	5.72227e-05	0.000683147	Down	OsGrx_C12 - glutaredoxin subgroup III expressed
Os05g0342100	1.34	0.63	0.57	0.12	0.22	0.05	0.846667	0.13	-2.70328	0.000928475	0.00712608	Down	wound-induced protein WI12 putative expressed
Os11g0123600	0.25	0.22	0.32	0.1	0.02	0	0.263333	0.04	-2.71882	0.0073526	0.0384342	Down	ATCHX putative expressed
Os09g0414900	7.29	4.88	5.57	0.21	0.96	1.51	5.91333	0.893333	-2.7267	6.00776e-07	1.32897e-05	Down	GASR10 - Gibberellin-regulated GASA FGAST FSnakin family protein precursor expressed
Os03g0160300	3.1	4.5	3.54	0.6	0.93	0.14	3.71333	0.556667	-2.73783	7.56203e-05	0.00087047	Down	expressed protein
Os10g0481500	1.05	0.59	1.42	0.17	0.12	0.15	1.02	0.146667	-2.79796	5.99232e-07	1.32654e-05	Down	nodulin putative expressed
Os05g0217800	42.33	16.52	24.35	3.85	2.98	5.13	27.7333	3.98667	-2.79837	7.10831e-18	9.04982e-16	Down	BURP domain containing protein expressed
Os06g0696400	412.32	430.06	399.22	75.07	41.71	59.04	413.867	58.6067	-2.82003	2.07159e-50	1.98231e-47	Down	glycosyl hydrolases family 16 putative expressed
Os06g0714366	0.45	1.92	2.47	0	0.47	0.19	1.61333	0.22	-2.87447	0.00428898	0.0250946	Down	--
Os12g0552600	0.95	0.36	0.65	0.03	0.16	0.07	0.653333	0.0866667	-2.91427	0.000132249	0.0014048	Down	MATE domain containing protein expressed
Os02g0757100	77.34	69.55	61.89	8.85	8.52	10.05	69.5933	9.14	-2.92868	1.5884e-112	7.85306e-109	Down	phosphate-induced protein 1 conserved region domain containing protein expressed
Os10g0551800	5.68	5.01	5.18	0.04	1.2	0.77	5.29	0.67	-2.98103	1.51404e-05	0.000219192	Down	LTPL139 - Protease inhibitor Fseed storage FLTP family protein precursor expressed
MSTRG.14134	0.44	1.31	1.37	0	0.26	0.13	1.04	0.13	-3	0.00212912	0.0142251	Down	PREDICTED: RPM1-interacting protein 4 [Oryza sativa Japonica Group]
Os01g0935800	7.23	3.65	5.17	0.45	0.56	0.93	5.35	0.646667	-3.04844	4.28316e-14	3.64056e-12	Down	protein kinase putative expressed
Os03g0606333	1.24	0.8	0.28	0	0.05	0.22	0.773333	0.09	-3.10309	0.00296698	0.0185837	Down	--
Os05g0355400	11.44	11.37	8.99	0.71	1.59	1.36	10.6	1.22	-3.11911	6.33329e-28	2.08745e-25	Down	universal stress protein domain containing protein putative expressed
Os02g0187700	17.42	21.42	16.25	1.56	2.17	2.46	18.3633	2.06333	-3.15378	2.78928e-49	2.43356e-46	Down	myb-like DNA-binding domain containing protein putative expressed
Os02g0527700	1.42	3.29	2.22	0.15	0.61	0	2.31	0.253333	-3.18878	0.000455503	0.00392108	Down	--
Os06g0156501	0.56	0.34	0.13	0.04	0	0.07	0.343333	0.0366667	-3.22707	0.00502617	0.0283885	Down	--
Os09g0568500	2.36	2.03	3.11	0.24	0	0.55	2.5	0.263333	-3.24697	5.92485e-05	0.0007033	Down	Cupin domain containing protein expressed
Os01g0171200	0.51	0.42	0.34	0.05	0.05	0.02	0.423333	0.04	-3.40372	6.77384e-07	1.48076e-05	Down	expressed protein
Os06g0184900	1.93	1.63	1.17	0.11	0	0.3	1.57667	0.136667	-3.52814	9.20936e-06	0.000142359	Down	transferase family protein putative expressed
Os06g0539700	1.78	1.69	1.94	0.25	0.11	0.1	1.80333	0.153333	-3.55592	1.52977e-09	6.21631e-08	Down	expressed protein
Os07g0633400	0.94	1.03	0.62	0.08	0.02	0.1	0.863333	0.0666667	-3.69488	8.8675e-10	3.76856e-08	Down	calmodulin-binding protein putative expressed
MSTRG.31666	1.28	0.45	1.65	0.1	0.16	0	1.12667	0.0866667	-3.70044	0.000160069	0.00164414	Down	alcohol oxidase-like [Oryza sativa Japonica Group]
Os02g0772100	0.07	0.18	0.56	0	0.03	0.03	0.27	0.02	-3.75489	0.0047348	0.0271093	Down	--
Os07g0235200	0.13	0.35	0.2	0.02	0.02	0.01	0.226667	0.0166667	-3.76553	1.20537e-05	0.000179679	Down	DNA binding protein putative expressed
Os12g0583300	14.04	15.34	9.51	0.67	1	1.03	12.9633	0.9	-3.84837	2.11382e-51	2.16222e-48	Down	aspartic proteinase nepenthesin precursor putative expressed
MSTRG.3378	0.09	6.62	0.98	0.06	0.1	0.37	2.56333	0.176667	-3.85892	0.000776759	0.00614611	Down	PDI-like [Oryza sativa Japonica Group]
Os06g0509900	5.03	1.71	5.06	0.12	0.29	0.39	3.93333	0.266667	-3.88264	6.23001e-10	2.71775e-08	Down	THION1 - Plant thionin family protein precursor putative expressed
Os10g0338858	0.26	0.83	0.6	0.1	0	0	0.563333	0.0333333	-4.07895	0.00694608	0.0368348	Down	expressed protein
Os01g0542100	0.02	0.18	0.15	0.01	0.01	0	0.116667	0.00666667	-4.12928	0.00175134	0.0121156	Down	expressed protein
MSTRG.31683	0.44	0.59	0.96	0	0.11	0	0.663333	0.0366667	-4.17719	0.00194601	0.0132037	Down	--
Os07g0443500	0.55	0.5	0.57	0	0	0.08	0.54	0.0266667	-4.33985	0.000840002	0.00654183	Down	MYB family transcription factor putative expressed
Os05g0399700	1.12	0.27	0.52	0	0	0.09	0.636667	0.03	-4.4075	0.00026957	0.00255807	Down	CHIT6 - Chitinase family protein precursor expressed
Os03g0782300	0.61	0.39	0.33	0	0.06	0	0.443333	0.02	-4.47032	0.000273579	0.00258618	Down	app1 putative expressed
Os05g0188750	0.39	0.29	0.27	0	0.04	0	0.316667	0.0133333	-4.56986	0.00239073	0.0156105	Down	--
MSTRG.31680	2.35	0.83	1.5	0	0	0.13	1.56	0.0433333	-5.16993	2.90908e-06	5.29741e-05	Down	--
Os12g0550800	2.26	0.18	0.9	0.06	0.02	0.01	1.11333	0.03	-5.21378	1.0539e-07	2.84467e-06	Down	expressed protein
Os11g0559600	0.89	1.03	1.08	0.06	0	0.02	1	0.0266667	-5.22882	3.86744e-15	3.68887e-13	Down	expressed protein
Os01g0686300	0.07	0.12	0.25	0	0	0	0.146667	0.001	-7.1964	0.000517674	0.00438125	Down	limonoid UDP-glucosyltransferase putative expressed
Os12g0160650	0	0.12	0.36	0	0	0	0.16	0.001	-7.32193	0.00612459	0.0333052	Down	--
Os11g0474500	0.23	0	0.29	0	0	0	0.173333	0.001	-7.43741	0.00750158	0.0390604	Down	expressed protein
Os08g0565750	0.03	0	0.57	0	0	0	0.2	0.001	-7.64386	0.00516415	0.0290617	Down	--
Os01g0214001	0.3	0.03	0.57	0	0	0	0.3	0.001	-8.22882	8.96092e-06	0.000138953	Down	--
Os06g0229900	0.36	0.25	0.42	0	0	0	0.343333	0.001	-8.42347	6.96054e-06	0.000111309	Down	Similar to Starch synthase IIa (EC 2.4.1.21) (Fragment).
Os07g0417600	0.58	0.72	0.55	0	0	0	0.616667	0.001	-9.26835	8.38487e-07	1.783e-05	Down	thaumatin putative expressed
MSTRG.31668	1.48	0.46	1.46	0	0	0	1.13333	0.001	-10.1464	9.67641e-07	2.01857e-05	Down	--

## Sheet: S0_R vs CK_R
Table S2 DEGs in response to sulfur deficiency in Roots
Gene ID	CK_R-1 _fpkm	CK_R-2 _fpkm	CK_R-3 _fpkm	S0_R-1 _fpkm	S0_R-2 _fpkm	S0_R-3 _fpkm	CK_R _mean	S0_R _mean	log2(fold chang)	P_Value	FDR	Regulation Pattern	Annatation
Os08g0136300	0	0	0	43.35	3.57	1.21	0.001	16.0433	13.9697	9.27004e-07	9.92823e-06	Up	FHA domain containing protein putative expressed
MSTRG.5654	0	0	0	11.95	8.23	8.27	0.001	9.48333	13.2112	4.72024e-29	7.11332e-27	Up	expressed protein
Os04g0206650	0	0	0	7.92	5.63	8.99	0.001	7.51333	12.8752	3.83135e-20	2.76307e-18	Up	--
Os02g0491300	0	0	0	7.73	7.7	4.55	0.001	6.66	12.7013	4.06005e-21	3.19484e-19	Up	--
Os10g0451700	0	0	0	7.71	5.89	5.7	0.001	6.43333	12.6514	2.01624e-17	1.13807e-15	Up	spotted leaf 11 putative expressed
Os07g0501100	0	0	0	8.83	1.8	7.16	0.001	5.93	12.5338	1.47545e-17	8.40242e-16	Up	expressed protein
Os01g0723025	0	0	0	5.23	6.03	5.09	0.001	5.45	12.412	2.63485e-22	2.28125e-20	Up	fasciclin domain containing protein expressed
Os09g0483200	0.43	1.24	0.11	3044.04	3251.37	2175.3	0.593333	2823.57	12.2164	2.65385e-47	9.42057e-45	Up	expressed protein
Os03g0663900	0	0	0	2.99	7.01	2	0.001	4	11.9658	6.59823e-13	2.15763e-11	Up	tropinone reductase 2 putative expressed
Os02g0464550	0	0	0	3.2	3.87	4.06	0.001	3.71	11.8572	2.05539e-13	7.21409e-12	Up	PHS1 putative expressed
Os09g0384900	0	0	0	0.92	1.1	8.06	0.001	3.36	11.7142	2.98311e-07	3.61012e-06	Up	auxin-induced protein 5NG4 putative expressed
Os09g0452700	1.93	1.78	0.49	4889.09	5205.71	3584.39	1.4	4559.73	11.6693	1.6493e-160	4.79015e-157	Up	--
Os06g0141600	0	0	0	4.09	1.48	4	0.001	3.19	11.6393	3.03464e-13	1.03802e-11	Up	cytochrome P450 putative expressed
Os07g0251301	0	0	0	4.59	2.33	2.09	0.001	3.00333	11.5523	2.19463e-08	3.33717e-07	Up	short-chain dehydrogenase Freductase putative expressed
Os04g0206300	0	0	0	3.21	1.69	4.1	0.001	3	11.5507	2.0571e-13	7.21409e-12	Up	GIY-YIG catalytic domain containing protein putative expressed
Os12g0420000	0	0	0	2.16	3.16	3.58	0.001	2.96667	11.5346	2.76084e-11	7.1189e-10	Up	--
Os09g0483150	0	0	0	3.53	2.72	2.51	0.001	2.92	11.5118	2.47502e-09	4.5081e-08	Up	terpene synthase putative expressed
Os01g0627800	0.38	0.56	0.12	851.62	996.45	595.94	0.353333	814.67	11.171	1.97268e-134	4.20155e-131	Up	Os5bglu21 - beta-glucosidase homologue similar to G. max isohydroxyurate hydrolase expressed
Os10g0344550	0	0	0	1.58	2.18	2.83	0.001	2.19667	11.1011	2.3493e-09	4.30118e-08	Up	RCN4 Centroradialis-like1 homologous to TFL1 gene%3B contains Pfam profile PF01161%3A Phosphatidylethanolamine-binding protein expressed
MSTRG.9240	0	0	0	1.77	2.02	2.08	0.001	1.95667	10.9342	1.09634e-06	1.14952e-05	Up	heavy metal associated domain containing protein expressed
MSTRG.22936	0	0.09	0	85.59	79.92	0.24	0.03	55.25	10.8468	5.85636e-06	5.13922e-05	Up	cytochrome P450 putative expressed
Os07g0146700	0	0	0	1.36	1.8	1.51	0.001	1.55667	10.6042	1.09962e-08	1.77069e-07	Up	RNA recognition motif containing protein putative expressed
Os01g0323950	0	0	0	1.57	1.23	1.55	0.001	1.45	10.5018	2.72081e-09	4.91654e-08	Up	uncharacterized Cys-rich domain containing protein putative expressed
Os04g0206350	0	0	0	1.76	1.24	1.28	0.001	1.42667	10.4784	7.76177e-12	2.1752e-10	Up	TPD1 putative expressed
Os07g0625500	0	0	0.21	120.56	108.93	69.96	0.07	99.8167	10.4777	3.12582e-14	1.22985e-12	Up	--
Os03g0700100	0	0	0	3.48	0.26	0.51	0.001	1.41667	10.4683	4.77738e-07	5.49614e-06	Up	OsWAK27 - OsWAK receptor-like protein kinase expressed
MSTRG.5506	0	0	0	1.78	1.21	1.15	0.001	1.38	10.4305	3.74979e-14	1.46453e-12	Up	helix-loop-helix DNA-binding domain containing protein expressed
Os04g0204100	0.32	0.06	0.25	358.36	282.86	227.03	0.21	289.417	10.4285	1.85648e-172	1.18622e-168	Up	ATCHX15 putative expressed
Os02g0744501	0	0	0	1.66	1.35	1.01	0.001	1.34	10.388	8.57916e-05	0.000553935	Up	expressed protein
Os08g0244750	0	0	0	1.1	0.98	1.82	0.001	1.3	10.3443	1.86563e-08	2.88495e-07	Up	expressed protein
Os07g0625600	0.21	0.31	0	249.67	225.23	193.58	0.173333	222.827	10.3282	4.55819e-94	4.55079e-91	Up	expressed protein
Os03g0804700	0	0	0	0.9	1.75	0.62	0.001	1.09	10.0901	5.0593e-07	5.79958e-06	Up	OsFBX180 - F-box domain containing protein expressed
MSTRG.1858	0	0	0	0.87	1.19	1.17	0.001	1.07667	10.0724	4.08123e-10	8.6235e-09	Up	expressed protein
MSTRG.5655	0	0	0	1.07	1.38	0.73	0.001	1.06	10.0498	1.02266e-13	3.74678e-12	Up	DUF1680 domain containing protein putative expressed
Os08g0156066	0	0	0	1.26	1.13	0.73	0.001	1.04	10.0224	1.26551e-08	2.02052e-07	Up	expressed protein
MSTRG.7724	0	0	0	2.25	0.32	0.41	0.001	0.993333	9.95613	7.5732e-08	1.03309e-06	Up	expressed protein
MSTRG.4680	0.1	0	0	37.56	39.98	18.64	0.0333333	32.06	9.90959	2.7702e-21	2.21256e-19	Up	transcription factor putative expressed
Os05g0506500	0	0	0	0.61	1.07	1.15	0.001	0.943333	9.88162	1.22256e-06	1.26731e-05	Up	expressed protein
MSTRG.12059	0	0	0	0.79	0.57	1.42	0.001	0.926667	9.85591	2.63432e-09	4.77376e-08	Up	high light inducible protein putative expressed
Os04g0206600	0.59	0.27	0.09	293.36	241.46	279.36	0.316667	271.393	9.7432	1.49294e-98	1.58988e-95	Up	aberrant pollen transmission 1 putative expressed
Os06g0483150	0	0	0	0.21	0.53	1.74	0.001	0.826667	9.69116	2.02685e-08	3.10868e-07	Up	plant protein of unknown function domain containing protein expressed
Os03g0259500	0.98	2.64	0.74	1277.34	1246.74	830.97	1.45333	1118.35	9.58779	5.69057e-106	6.49294e-103	Up	exostosin family protein putative expressed
Os10g0504900	0	0	0	1.11	0.38	0.81	0.001	0.766667	9.58246	0.000113913	0.00070762	Up	pectinesterase putative expressed
MSTRG.27982	0	0	0	0.83	0.91	0.46	0.001	0.733333	9.51833	1.13781e-05	9.22372e-05	Up	expressed protein
MSTRG.4223	0	0	0	0.84	0.28	0.91	0.001	0.676667	9.4023	0.000112143	0.000698118	Up	retrotransposon protein putative unclassified expressed
Os04g0627900	1.44	0.6	0.99	795.43	742.35	510.66	1.01	682.813	9.40099	5.67663e-194	6.04524e-190	Up	--
MSTRG.26516	0	0	0	1.11	0.49	0.39	0.001	0.663333	9.37359	0.0139852	0.0432107	Up	--
MSTRG.2733	0	0	0	0.55	0.52	0.91	0.001	0.66	9.36632	3.77251e-09	6.6222e-08	Up	--
Os01g0711800	0	0	0	0.61	1	0.37	0.001	0.66	9.36632	3.06938e-06	2.91067e-05	Up	protein disulfide isomerase putative expressed
Os03g0714100	0	0	0	0.76	0.61	0.6	0.001	0.656667	9.35902	1.25195e-06	1.29525e-05	Up	TKL_IRAK_CrRLK1L-1.1 - The CrRLK1L-1 subfamily has homology to the CrRLK1L homolog expressed
MSTRG.12493	0	0	0	0.3	0.86	0.72	0.001	0.626667	9.29155	3.74514e-08	5.43369e-07	Up	--
MSTRG.6570	0	0	0	0.18	0.8	0.83	0.001	0.603333	9.23681	3.68841e-05	0.000263147	Up	uncharacterized protein At4g06744 precursor putative expressed
MSTRG.32762	0	0	0	0.56	0.59	0.65	0.001	0.6	9.22882	5.94201e-08	8.26094e-07	Up	3-ketoacyl-CoA synthase putative expressed
MSTRG.15058	0	0	0	0.33	0.77	0.59	0.001	0.563333	9.13785	6.97731e-06	6.01497e-05	Up	DUF617 domain containing protein expressed
Os04g0111301	0	0	0	0.59	0.58	0.51	0.001	0.56	9.12928	0.00338522	0.0132668	Up	cytokinin-O-glucosyltransferase 2 putative expressed
Os01g0697250	0	0	0	0.94	0.4	0.33	0.001	0.556667	9.12067	0.00135652	0.00611255	Up	retrotransposon protein putative unclassified expressed
Os02g0587600	0	0	0	0.6	0.29	0.77	0.001	0.553333	9.11201	0.00101913	0.00478599	Up	expressed protein
Os07g0529000	0.03	0.07	0.38	34.1	56.01	160.65	0.16	83.5867	9.02906	4.74206e-15	2.07818e-13	Up	GATA zinc finger domain containing protein expressed
Os07g0620700	0	0	0	0.38	0.3	0.83	0.001	0.503333	8.97537	1.68e-09	3.1891e-08	Up	--
Os02g0316800	0	0	0	0.73	0.13	0.64	0.001	0.5	8.96578	0.000324847	0.00178044	Up	--
Os01g0288800	0	0	0	0.09	0.52	0.88	0.001	0.496667	8.95613	4.77439e-05	0.000329462	Up	membrane associated DUF588 domain containing protein putative expressed
MSTRG.16498	0	0	0	0.39	0.69	0.4	0.001	0.493333	8.94642	0.0144745	0.0444254	Up	--
Os10g0549700	0	0	0	0.37	0.41	0.69	0.001	0.49	8.93664	0.00247053	0.0101857	Up	--
Os08g0122400	0	0	0	0.84	0.51	0.09	0.001	0.48	8.90689	0.000779605	0.00380373	Up	expressed protein
Os01g0873000	0	0	0	0.17	0.54	0.72	0.001	0.476667	8.89684	0.00135498	0.00610733	Up	sulfotransferase domain containing protein expressed
Os05g0248200	0.07	0	0	17.82	5.68	8.35	0.0233333	10.6167	8.82972	6.76979e-21	5.19907e-19	Up	cytochrome P450 monooxygenase CYP711A12 putative expressed
Os04g0404000	0	0	0	0.14	0.4	0.82	0.001	0.453333	8.82443	0.0030834	0.0122508	Up	expressed protein
Os04g0204000	0	0	0	0.27	0.39	0.64	0.001	0.433333	8.75933	1.31026e-06	1.34772e-05	Up	PREDICTED: protein DETOXIFICATION 42-like isoform X2 [Oryza sativa Japonica Group]
Os10g0506200	0.2	0.19	0.23	83.01	87.44	97.56	0.206667	89.3367	8.7558	2.12903e-302	6.80182e-298	Up	PREDICTED: wall-associated receptor kinase 2-like [Oryza brachyantha]
MSTRG.19709	0	0	0	0.41	0.44	0.42	0.001	0.423333	8.72565	5.9574e-07	6.69694e-06	Up	anthocyanin 3-O-beta-glucosyltransferase putative expressed
Os10g0386300	0.41	0.39	0.55	250.84	212.51	107.44	0.45	190.263	8.72386	2.85347e-116	3.9636e-113	Up	ctr copper transporter family protein putative expressed
Os04g0204150	0.18	0.34	0.46	154.48	135.76	116.34	0.326667	135.527	8.69654	1.49394e-179	1.19321e-175	Up	nodulin family protein putative expressed
Os04g0360400	0	0	0	0.36	0.74	0.13	0.001	0.41	8.67948	0.00750385	0.025878	Up	expressed protein
Os06g0252800	0	0	0	0.41	0.42	0.38	0.001	0.403333	8.65583	4.53107e-06	4.10197e-05	Up	proton-dependent oligopeptide transport putative expressed
Os10g0122500	0	0	0	1.08	0.07	0.05	0.001	0.4	8.64386	0.000408222	0.00217728	Up	--
Os04g0417000	0	0	0	0.23	0.34	0.61	0.001	0.393333	8.61961	8.70069e-07	9.39404e-06	Up	sulfotransferase domain containing protein expressed
MSTRG.4893	0	0	0	0.3	0.59	0.28	0.001	0.39	8.60733	1.92899e-05	0.000147709	Up	--
Os01g0872900	0	0	0	0.38	0.34	0.42	0.001	0.38	8.56986	1.80379e-06	1.80086e-05	Up	--
Os03g0356470	0	0	0	0.21	0.51	0.41	0.001	0.376667	8.55714	7.35505e-05	0.000482305	Up	invertase Fpectin methylesterase inhibitor family protein putative expressed
Os01g0348800	0	0	0	0.12	0.72	0.25	0.001	0.363333	8.50515	0.00438188	0.0165241	Up	--
Os01g0723000	1.32	1.28	0.93	403.29	459.03	414.29	1.17667	425.537	8.49843	1.12277e-301	1.79351e-297	Up	ATROPGEF7 FROPGEF7 putative expressed
Os01g0812850	0	0	0	0.18	0.66	0.23	0.001	0.356667	8.47843	0.00717089	0.0249071	Up	ATOFP18 FOFP18 putative expressed
Os11g0562600	0	0	0	0.25	0.38	0.43	0.001	0.353333	8.46489	0.000343811	0.00187059	Up	phytosulfokines 1 precursor putative expressed
Os07g0271600	0	0	0	0.36	0.12	0.57	0.001	0.35	8.45121	0.0050857	0.0187295	Up	IQ calmodulin-binding motif family protein putative expressed
Os05g0247800	0.08	0.96	0.45	336.76	127.47	56.75	0.496667	173.66	8.44977	3.9479e-16	1.95546e-14	Up	glutathione S-transferase putative expressed
MSTRG.11847	0	0	0	0.16	0.37	0.49	0.001	0.34	8.40939	0.0165825	0.0496004	Up	--
MSTRG.4224	0	0	0	0.36	0.18	0.46	0.001	0.333333	8.38082	0.0027829	0.0112499	Up	transferase family protein putative expressed
Os02g0796000	0	0	0	0.3	0.5	0.18	0.001	0.326667	8.35168	3.41806e-05	0.000246064	Up	expressed protein
Os05g0166525	0	0	0	0.3	0.08	0.56	0.001	0.313333	8.29155	3.49609e-06	3.26779e-05	Up	DUF617 domain containing protein expressed
Os12g0457500	0	0	0	0.23	0.38	0.32	0.001	0.31	8.27612	1.07067e-07	1.41756e-06	Up	Leucine Rich Repeat family protein expressed
Os05g0469812	0	0	0	0.31	0.27	0.35	0.001	0.31	8.27612	1.39567e-06	1.42479e-05	Up	--
Os11g0702000	0	0	0	0	0.1	0.77	0.001	0.29	8.17991	0.0150614	0.0459319	Up	DUF630 FDUF632 domains containing protein putative expressed
Os01g0101850	0	0	0	0.11	0.25	0.49	0.001	0.283333	8.14636	6.35108e-05	0.000422982	Up	lysine ketoglutarate reductase trans-splicing related 1 putative expressed
Os06g0177700	0	0	0	0.51	0.33	0	0.001	0.28	8.12928	0.015805	0.0477891	Up	expressed protein
Os01g0890200	0	0	0	0.08	0.53	0.22	0.001	0.276667	8.11201	6.70495e-06	5.80829e-05	Up	NB-ARC domain containing protein expressed
Os02g0179600	2.89	3.49	2.25	889.89	904.36	551.68	2.87667	781.977	8.08658	4.53534e-168	1.81119e-164	Up	--
Os05g0469701	0	0	0	0.29	0.24	0.24	0.001	0.256667	8.00375	7.22763e-06	6.20889e-05	Up	expressed protein
Os09g0483300	0.25	0	0.44	57.65	61.31	55.39	0.23	58.1167	7.98117	3.10138e-82	2.54058e-79	Up	fasciclin domain containing protein expressed
Os10g0162856	0	0	0	0.4	0.14	0.21	0.001	0.25	7.96578	0.000286505	0.00159717	Up	expressed protein
Os01g0653500	0	0	0	0.47	0.11	0.17	0.001	0.25	7.96578	0.000564611	0.00287507	Up	RNA-binding zinc finger protein putative expressed
Os01g0247550	0	0	0	0.16	0.19	0.4	0.001	0.25	7.96578	0.0152822	0.0464721	Up	PMR5 putative expressed
MSTRG.24093	0	0.09	0	5.96	7.61	8.77	0.03	7.44667	7.95549	5.92008e-14	2.23036e-12	Up	glyceraldehyde-3-phosphate dehydrogenase putative expressed
Os11g0143700	0	0	0	0.01	0.36	0.34	0.001	0.236667	7.88671	0.000656667	0.0032857	Up	expressed protein
MSTRG.10150	0	0	0	0.32	0.15	0.24	0.001	0.236667	7.88671	0.00294249	0.0117936	Up	DUF630 FDUF632 domains containing protein putative expressed
Os06g0341300	0	0	0	0.36	0	0.35	0.001	0.236667	7.88671	0.0118864	0.0378573	Up	RING-H2 finger protein putative expressed
Os04g0206500	0.87	0.54	0.43	160.81	160.61	114.04	0.613333	145.153	7.88669	1.29031e-142	3.171e-139	Up	esterase putative expressed
Os01g0101900	0	0.24	0.34	37.94	56.53	39.75	0.193333	44.74	7.85433	7.36475e-42	2.04599e-39	Up	expressed protein
Os04g0211900	0	0	0	0.29	0.29	0.11	0.001	0.23	7.84549	0.000301023	0.00166703	Up	expressed protein
Os09g0420000	0	0	0	0.05	0.19	0.45	0.001	0.23	7.84549	0.00535548	0.0195271	Up	CRP8 - Cysteine-rich family protein precursor expressed
Os02g0227500	0	0	0	0.19	0.27	0.19	0.001	0.216667	7.75933	0.00125603	0.00572763	Up	B3 DNA binding domain containing protein expressed
Os06g0612300	0	0	0	0.07	0.14	0.43	0.001	0.213333	7.73697	0.0001322	0.000807093	Up	expressed protein
Os11g0255300	0	0	0	0.41	0.03	0.18	0.001	0.206667	7.69116	0.00133405	0.00602917	Up	ZOS1-12 - C2H2 zinc finger protein expressed
Os09g0324300	0.19	0.45	0.24	70.82	62.33	45.47	0.293333	59.54	7.66517	2.90862e-106	3.44165e-103	Up	GDSL-like lipase Facylhydrolase putative expressed
Os10g0158400	0	0	0	0.36	0.07	0.17	0.001	0.2	7.64386	0.00193928	0.008284	Up	--
Os03g0687400	0	0	0	0.31	0.12	0.16	0.001	0.196667	7.61961	0.0154409	0.046821	Up	laccase precursor protein putative expressed
MSTRG.10340	0	0	0.05	2.09	3.13	4.52	0.0166667	3.24667	7.60585	1.05458e-17	6.12575e-16	Up	expressed protein
MSTRG.20881	0	0	0.44	22.51	33.77	27.84	0.146667	28.04	7.5788	2.96074e-05	0.000217148	Up	--
Os04g0691300	0	0	0	0.29	0.09	0.19	0.001	0.19	7.56986	0.00646657	0.0229052	Up	tRNA synthetase class I family protein putative expressed
Os04g0208500	0	0	0	0.22	0.28	0.06	0.001	0.186667	7.54432	0.000201743	0.00117486	Up	expressed protein
Os12g0509200	0	0	0	0.14	0.31	0.1	0.001	0.183333	7.51833	0.000114891	0.000712863	Up	glyoxalase family protein putative expressed
Os10g0150600	0	0	0	0.28	0.16	0.09	0.001	0.176667	7.46489	0.00775149	0.0266113	Up	uncharacterized protein At4g06744 precursor putative expressed
Os11g0109633	0	0	0	0.02	0.31	0.18	0.001	0.17	7.40939	0.00427532	0.0161776	Up	--
Os03g0234100	0	0	0	0.12	0.21	0.18	0.001	0.17	7.40939	0.00830242	0.0281159	Up	G-protein alpha subunit putative expressed
Os04g0612700	0	0.04	0	2.03	2.95	1.62	0.0133333	2.2	7.36632	2.11847e-11	5.54308e-10	Up	NHL25 putative expressed
Os03g0587600	0	0	0	0.09	0.1	0.3	0.001	0.163333	7.35168	7.89822e-05	0.0005147	Up	--
Os02g0183900	0.4	0.17	0.18	36.72	31.02	49.75	0.25	39.1633	7.29143	6.75681e-97	6.96344e-94	Up	--
Os09g0344400	0.72	1.03	0.92	157.44	135.68	103.61	0.89	132.243	7.21517	1.02564e-168	4.68101e-165	Up	expressed protein
Os01g0280500	1.41	2.14	1.76	347.66	231.94	202.85	1.77	260.817	7.20314	5.42585e-140	1.23818e-136	Up	Regulator of chromosome condensation RCC1 domain containing protein.
Os10g0344500	1.44	2.14	0.76	216.8	216.62	197.9	1.44667	210.44	7.18453	7.08704e-89	6.65932e-86	Up	auxin efflux carrier component putative expressed
Os09g0433900	0	0	0	0.1	0.33	0	0.001	0.143333	7.16323	0.0102222	0.0334336	Up	--
MSTRG.33436	0.73	1.25	0.88	4.73	197.44	204.69	0.953333	135.62	7.15237	4.8312e-09	8.34944e-08	Up	skin secretory protein xP2 precursor putative expressed
MSTRG.2280	0	0	0.05	2.26	2.68	2.1	0.0166667	2.34667	7.1375	1.30899e-18	8.3639e-17	Up	bHLH family protein putative expressed
Os05g0218981	0	0	0	0.19	0	0.22	0.001	0.136667	7.09452	0.0051794	0.0190066	Up	12-oxophytodienoate reductase putative expressed
Os10g0494300	0	0	0	0.24	0.04	0.12	0.001	0.133333	7.05889	0.000497151	0.0025847	Up	peroxidase precursor putative expressed
Os10g0122200	0	0	0	0.14	0.21	0.05	0.001	0.133333	7.05889	0.00960909	0.0317594	Up	aspartyl protease family protein putative expressed
Os12g0191601	1.46	3.03	1.96	289.85	237.4	327.66	2.15	284.97	7.05033	2.06576e-118	3.14271e-115	Up	expressed protein
MSTRG.21899	0	0	0.04	1.83	2.04	1.4	0.0133333	1.75667	7.04166	1.75575e-08	2.72581e-07	Up	expressed protein
Os01g0374000	0.34	0	0.07	13.69	9.95	30.05	0.136667	17.8967	7.03289	2.97705e-09	5.3403e-08	Up	IQ calmodulin-binding motif family protein putative expressed
Os06g0535100	0.03	0	0	0.88	1.79	1.25	0.01	1.30667	7.02975	3.97834e-10	8.44913e-09	Up	amino acid transporter putative expressed
Os01g0510200	32.94	32.95	14.58	3988.19	3577.54	2748.63	26.8233	3438.12	7.00199	7.92476e-88	6.84271e-85	Up	glycosyl hydrolases family 17 putative expressed
Os01g0782800	0	0	0	0.18	0.17	0.03	0.001	0.126667	6.98489	0.00189183	0.00811167	Up	expressed protein
Os09g0483400	14.17	15.33	9.28	1896.56	1575.9	1420.34	12.9267	1630.93	6.9792	2.90795e-145	7.74194e-142	Up	estradiol 17-beta-dehydrogenase 12 putative expressed
Os09g0342000	1	0.7	0.52	111.51	86.25	76.82	0.74	91.5267	6.95052	1.10532e-117	1.60512e-114	Up	--
Os04g0464850	0	0	0	0.18	0.17	0	0.001	0.116667	6.86625	0.0140552	0.0433682	Up	expressed protein
MSTRG.33536	0	0	0	0.07	0.04	0.23	0.001	0.113333	6.82443	0.00923973	0.0307522	Up	expressed protein
Os01g0619900	0	0	0	0.09	0.13	0.12	0.001	0.113333	6.82443	0.0159927	0.0482333	Up	expressed protein
Os04g0390700	0	0	0	0.05	0.12	0.16	0.001	0.11	6.78136	0.0165825	0.0496004	Up	OsSAUR5 - Auxin-responsive SAUR gene family member expressed
MSTRG.23192	0.06	0.1	0.11	7.89	8.79	12.5	0.09	9.72667	6.75588	7.94704e-47	2.67255e-44	Up	inactive receptor kinase At2g26730 precursor putative expressed
Os01g0523100	0	0	0	0.15	0.12	0.04	0.001	0.103333	6.69116	0.000400164	0.00213966	Up	expressed protein
MSTRG.9695	0	0	0	0.02	0.05	0.24	0.001	0.103333	6.69116	0.00232862	0.00968936	Up	--
Os12g0613100	0	0	0	0.06	0.1	0.15	0.001	0.103333	6.69116	0.00499997	0.0184563	Up	expressed protein
Os09g0499400	0.2	0.11	0.15	15.64	20.51	9.85	0.153333	15.3333	6.64386	1.38394e-61	7.13132e-59	Up	WRKY43 expressed
Os04g0411100	0	0	0	0.09	0.15	0.06	0.001	0.1	6.64386	0.0133429	0.0416127	Up	--
Os12g0139800	0	0	0	0.06	0.18	0.06	0.001	0.1	6.64386	0.0152272	0.0463359	Up	TKL_IRAK_DUF26-lc.7 - DUF26 kinases have homology to DUF26 containing loci expressed
Os08g0285100	0	0	0.03	0.72	1.18	1.06	0.01	0.986667	6.62449	3.89451e-07	4.58952e-06	Up	PPR repeat domain containing protein putative expressed
Os07g0629500	0.14	0.16	0.12	10.63	10.72	19.83	0.14	13.7267	6.61541	1.01611e-60	5.07231e-58	Up	--
MSTRG.12172	0	0	0.11	4.62	0.91	4.78	0.0366667	3.43667	6.5504	4.90305e-09	8.45803e-08	Up	expressed protein
MSTRG.33179	0	0.12	0.35	10.63	13.73	17.67	0.156667	14.01	6.48261	5.43269e-09	9.2964e-08	Up	expressed protein
Os07g0602000	0.47	0.72	0.28	24.62	18.13	86.83	0.49	43.1933	6.46188	1.52809e-29	2.35843e-27	Up	FAD-linked oxidoreductase protein putative expressed
MSTRG.5635	0.5	0.35	0.2	28.7	30.07	29.63	0.35	29.4667	6.39559	5.19169e-88	4.60733e-85	Up	STRUBBELIG-RECEPTOR FAMILY 6 precursor putative expressed
MSTRG.21061	0	0	0.03	0.76	0.73	0.87	0.01	0.786667	6.29768	8.29682e-15	3.55317e-13	Up	B3 DNA binding domain containing protein expressed
Os12g0496700	0.08	0	0	2.26	2.28	1.74	0.0266667	2.09333	6.29462	8.26566e-15	3.54458e-13	Up	expressed protein
Os11g0186300	0	0	0	0.09	0.08	0.06	0.001	0.0766667	6.26053	0.00160561	0.00704134	Up	IQ calmodulin-binding motif domain containing protein expressed
Os10g0565700	0	0	0	0.1	0.08	0.05	0.001	0.0766667	6.26053	0.00433913	0.01639	Up	Peptidase S8 and S53 subtilisin kexin sedolisin domain containing protein.
Os03g0726300	0	0	0	0.02	0.1	0.11	0.001	0.0766667	6.26053	0.00560715	0.0202965	Up	STRUBBELIG-RECEPTOR FAMILY 6 precursor putative expressed
Os07g0440900	0.08	0.07	0.06	6.44	4.94	4.56	0.07	5.31333	6.24612	7.94042e-68	4.61237e-65	Up	ZOS4-14 - C2H2 zinc finger protein expressed
Os09g0341500	0.85	0.47	0.5	46.79	43.56	45.48	0.606667	45.2767	6.22172	2.09088e-123	3.33997e-120	Up	expressed protein
Os06g0592500	6.92	18.04	8.53	1129.85	1027.15	260.9	11.1633	805.967	6.17388	1.39375e-32	2.55905e-30	Up	--
Os04g0127750	0	0	0	0.02	0.14	0.05	0.001	0.07	6.12928	0.000145859	0.000877903	Up	retrotransposon protein putative unclassified expressed
Os09g0442400	2.97	2.2	1.66	166.41	170.54	130.16	2.27667	155.703	6.09573	3.07045e-107	3.77287e-104	Up	expressed protein
Os04g0206450	0.08	0.39	0.22	18.42	13.48	14.19	0.23	15.3633	6.06171	5.35773e-52	2.22297e-49	Up	PROLM25 - Prolamin precursor expressed
Os01g0208000	0	0.13	0	1.6	1.55	5.5	0.0433333	2.88333	6.05612	5.94764e-08	8.26512e-07	Up	expressed protein
Os04g0500600	0	0	0.12	1.77	2.01	4.02	0.04	2.6	6.02237	2.60859e-11	6.74265e-10	Up	expressed protein
Os06g0146600	4.89	3.8	4.37	250.86	330.41	258.8	4.35333	280.023	6.00728	6.81363e-171	3.62803e-167	Up	--
Os06g0652100	0	0	0.05	0.83	1.18	1.19	0.0166667	1.06667	6	7.67889e-12	2.15387e-10	Up	Os9bglu29 - beta-glucosidase homologue similar to Os4bglu12 exoglucanase expressed
Os10g0343951	0.22	0.37	0.29	16.31	19.45	19.06	0.293333	18.2733	5.96105	1.63031e-45	5.15694e-43	Up	expressed protein
Os07g0605800	6.68	4.25	4.21	444.14	302.15	194.4	5.04667	313.563	5.95728	4.32762e-69	2.60866e-66	Up	--
Os03g0757600	2.83	3.05	2.42	174.5	190.52	149.87	2.76667	171.63	5.95501	1.50283e-165	4.80124e-162	Up	expressed protein
MSTRG.19551	0.22	0.27	0.23	18.45	11.1	14.54	0.24	14.6967	5.93631	4.49775e-50	1.774e-47	Up	receptor protein kinase CLAVATA1 precursor putative expressed
Os12g0150700	0.88	0.8	0.69	52.54	49.77	41.88	0.79	48.0633	5.92694	1.36382e-131	2.56301e-128	Up	KANADI1 putative expressed
MSTRG.20062	0	0	0.06	1.39	0.88	1.35	0.02	1.20667	5.91488	1.22977e-05	9.8765e-05	Up	white-brown complex homolog protein putative expressed
MSTRG.12165	0	0	0.03	0.35	0.7	0.76	0.01	0.603333	5.91488	2.45137e-05	0.000183281	Up	hydrolase alpha Fbeta fold family domain containing protein expressed
MSTRG.20882	0.47	0.65	0.96	27.18	39.33	55.96	0.693333	40.8233	5.8797	8.65013e-71	5.52709e-68	Up	cytochrome P450 putative expressed
MSTRG.17585	0.5	0.28	0.17	13.69	19.88	19.51	0.316667	17.6933	5.8041	1.24425e-38	2.98882e-36	Up	cytochrome P450 putative expressed
Os09g0326100	0.02	0	0	0.5	0.35	0.25	0.00666667	0.366667	5.78136	4.53477e-07	5.24916e-06	Up	oxidoreductase aldo Fketo reductase family protein putative expressed
Os10g0344000	2.64	2.52	1.54	130.79	141.87	95.66	2.23333	122.773	5.78065	1.55288e-84	1.30556e-81	Up	expressed protein
Os05g0315700	0.06	0.26	0.14	3.1	6.6	15.58	0.153333	8.42667	5.78022	1.2716e-19	8.909e-18	Up	DUF1645 domain containing protein putative expressed
Os06g0697500	4.03	5.29	3.27	302.21	270.13	92.39	4.19667	221.577	5.72242	9.27611e-43	2.66985e-40	Up	glucan endo-1 3-beta-glucosidase precursor putative expressed
MSTRG.15638	0	0.1	0.18	5.28	3.07	6.17	0.0933333	4.84	5.69647	3.3973e-20	2.46675e-18	Up	expressed protein
Os09g0324400	4.95	3.47	4.33	271.16	196.34	184.67	4.25	217.39	5.67668	8.9968e-131	1.59683e-127	Up	NBS-LRR, partial [Oryza sativa Indica Group]
Os06g0104900	0.21	1.85	0.35	37.61	33.71	50.75	0.803333	40.69	5.66253	1.41708e-09	2.73222e-08	Up	--
Os03g0660500	0	0	0.04	0.49	0.37	1.12	0.0133333	0.66	5.62936	0.00277963	0.0112418	Up	expressed protein
Os09g0415050	0	0.2	0.13	2.56	3.05	9.87	0.11	5.16	5.5518	0.000184422	0.00108387	Up	no apical meristem protein putative expressed
Os06g0549950	0	0	0.04	0.04	0.28	1.53	0.0133333	0.616667	5.53138	0.000911684	0.00436352	Up	Cyclopropane-fatty-acyl-phospholipid synthase putative expressed
MSTRG.9898	0	0.08	0	0.68	0.99	2.02	0.0266667	1.23	5.52748	1.50013e-05	0.000118103	Up	remorin C-terminal domain containing protein putative expressed
MSTRG.21967	0	0.02	0.03	0.18	0.2	1.9	0.0166667	0.76	5.51096	5.19816e-06	4.62851e-05	Up	Similar to Glutathione synthase. (Os12t0263050-00)
Os08g0188900	0.7	2.09	1.14	42.13	51.74	85.33	1.31	59.7333	5.5109	7.73592e-40	1.99312e-37	Up	haloacid dehalogenase-like hydrolase family protein putative expressed
Os09g0541000	0.12	0.12	0.05	2.2	9.04	1.88	0.0966667	4.37333	5.49957	3.02481e-13	1.03576e-11	Up	thylakoid lumenal 20 kDa protein putative expressed
Os01g0154500	0.08	0.16	0.06	4.22	6.73	2.58	0.1	4.51	5.49506	5.34983e-21	4.15247e-19	Up	expressed protein
Os04g0127800	0.08	0.03	0.02	1.67	2.56	1.56	0.0433333	1.93	5.47698	4.81265e-24	4.8503e-22	Up	P21-Rho-binding domain containing protein putative expressed
Os09g0279300	0	0	0.07	0.87	1.46	0.76	0.0233333	1.03	5.46411	0.000198198	0.00115569	Up	genetic modifier putative expressed
Os02g0732600	0	0	0.06	0.48	0.62	1.52	0.02	0.873333	5.44846	1.04827e-05	8.59604e-05	Up	--
Os03g0145775	0	0	0.08	0.76	1.57	1.16	0.0266667	1.16333	5.44708	0.000116964	0.000724883	Up	--
MSTRG.19004	0	0.02	0.08	1.61	1.26	1.34	0.0333333	1.40333	5.39575	2.5948e-18	1.61281e-16	Up	expressed protein
MSTRG.17401	0.19	0	0	2.47	3.66	1.67	0.0633333	2.6	5.3594	5.55442e-08	7.79668e-07	Up	--
Os11g0136101	0	0	0.04	0.49	0.48	0.65	0.0133333	0.54	5.33985	4.13095e-06	3.78587e-05	Up	retrotransposon protein putative Ty1-copia subclass expressed
Os06g0573500	0	0	0	0.03	0.02	0.07	0.001	0.04	5.32193	0.0123484	0.0390317	Up	RALFL39 - Rapid ALkalinization Factor RALF family protein precursor expressed
Os03g0165900	0.89	0.43	0.41	28.97	18.39	21.36	0.576667	22.9067	5.31189	2.6489e-50	1.05784e-47	Up	SAP domain containing protein expressed
Os05g0395400	14.99	16.4	9.86	703.87	563.02	358.25	13.75	541.713	5.30003	1.48462e-59	7.07922e-57	Up	--
Os05g0550600	0.75	1.1	0.5	25.39	46.79	19.89	0.783333	30.69	5.292	3.51441e-32	6.30777e-30	Up	expansin precursor putative expressed
Os06g0559400	0.63	0.68	0.56	15.51	22.64	35.03	0.623333	24.3933	5.29034	6.01086e-48	2.28613e-45	Up	--
Os02g0462800	0.14	0.16	0.06	4.31	4.64	4.9	0.12	4.61667	5.26575	5.36608e-26	6.14464e-24	Up	DNA2 - Putative DNA replication helicase 2 protein expressed
Os07g0271500	0	0	0.07	0.91	0.7	1.06	0.0233333	0.89	5.25334	4.37395e-08	6.26913e-07	Up	--
MSTRG.8091	0	0	0.05	0.45	0.56	0.89	0.0166667	0.633333	5.24793	1.23226e-06	1.27694e-05	Up	BURP domain containing protein expressed
Os03g0179700	0.09	0.17	0.12	1.84	3.63	8.93	0.126667	4.8	5.24393	4.446e-14	1.7238e-12	Up	DNA repair protein Rad51 putative expressed
MSTRG.6568	0	0	0.06	0.16	0.31	1.8	0.02	0.756667	5.24159	0.000147497	0.000886256	Up	retrotransposon protein putative unclassified expressed
MSTRG.10024	0	0	0.07	0.46	0.47	1.71	0.0233333	0.88	5.23704	5.18785e-06	4.62062e-05	Up	--
Os05g0263100	0.07	0.53	0.19	3.97	5.48	19.74	0.263333	9.73	5.20748	2.19372e-07	2.73449e-06	Up	expressed protein
MSTRG.27221	0	0	0.13	0.65	2.31	1.81	0.0433333	1.59	5.19741	1.55262e-05	0.000121815	Up	O-methyltransferase putative expressed
Os05g0469600	0.24	0.15	0.17	7.01	6.25	7.14	0.186667	6.8	5.187	6.77227e-65	3.73035e-62	Up	ELMO FCED-12 family protein putative expressed
Os02g0609200	0	0.43	0.38	6.59	3.2	19.41	0.27	9.73333	5.1719	1.06574e-08	1.71788e-07	Up	DUF623 domain containing protein expressed
MSTRG.33469	0.56	0.42	0.44	13.47	15.99	21.7	0.473333	17.0533	5.17105	1.84241e-52	7.95421e-50	Up	integral membrane protein DUF6 containing protein expressed
Os01g0959750	6.76	7.88	5.76	274	222.19	237.45	6.8	244.547	5.16843	9.89276e-116	1.31689e-112	Up	BTBN8 - Bric-a-Brac Tramtrack Broad Complex BTB domain with non-phototropic hypocotyl 3 NPH3 and coiled-coil domains expressed
Os01g0373700	1.7	3.35	3.49	96.66	76.39	133.32	2.84667	102.123	5.1649	5.9997e-59	2.8188e-56	Up	Mur ligase family protein putative expressed
Os06g0142200	1.35	4.68	1.99	107.05	81.47	95.75	2.67333	94.7567	5.14752	2.41958e-35	5.15338e-33	Up	uncharacterized UPF0114 domain containing protein expressed
MSTRG.4972	0	0	0.13	0.29	0.99	3.26	0.0433333	1.51333	5.12611	0.000242414	0.00138124	Up	PREDICTED: protein TORNADO 2-like [Oryza sativa Japonica Group]
Os05g0473401	0.04	0.12	0.19	5.22	3.03	3.97	0.116667	4.07333	5.12575	7.18451e-32	1.27517e-29	Up	expressed protein
Os03g0120800	0	0.02	0.07	1.12	1.25	0.75	0.03	1.04	5.11548	1.14599e-12	3.6178e-11	Up	expressed protein
MSTRG.28235	0.2	0.62	0.37	14.61	17.47	8.99	0.396667	13.69	5.10905	1.00502e-26	1.23494e-24	Up	expressed protein
Os10g0413900	0	0	0.03	0.6	0.21	0.2	0.01	0.336667	5.07325	0.00045449	0.00239328	Up	xyloglucan galactosyltransferase KATAMARI1 putative expressed
MSTRG.28997	0.09	0.05	0.11	1.94	1.91	4.52	0.0833333	2.79	5.06523	1.61804e-27	2.17198e-25	Up	CBS domain containing membrane protein putative expressed
Os11g0514100	0	0	0	0.06	0.03	0.01	0.001	0.0333333	5.05889	0.013961	0.04314	Up	expressed protein
Os06g0162700	0.07	0	0.02	0.83	1.17	0.88	0.03	0.96	5	3.29692e-10	7.1169e-09	Up	--
Os04g0203600	0.19	0.06	0.25	6.26	3.44	6.07	0.166667	5.25667	4.97911	6.81386e-26	7.66512e-24	Up	--
MSTRG.4974	0	0	0.04	0.56	0.25	0.42	0.0133333	0.41	4.94251	1.58951e-05	0.000124313	Up	transferase family protein putative expressed
Os07g0628700	0	0.02	0	0.03	0.15	0.43	0.00666667	0.203333	4.93074	0.00304729	0.0121329	Up	1-aminocyclopropane-1-carboxylate oxidase protein putative expressed
MSTRG.13384	0.54	0.44	0.46	16.83	13.03	13.78	0.48	14.5467	4.92151	3.95726e-88	3.61218e-85	Up	--
MSTRG.33177	0.25	0.15	0.32	5.48	6.73	9.56	0.24	7.25667	4.9182	2.24224e-46	7.38507e-44	Up	expressed protein
Os06g0105100	0.54	0.29	0.84	8.4	4.72	37.03	0.556667	16.7167	4.90833	6.4862e-08	8.96673e-07	Up	ATEB1A-like microtubule associated protein putative expressed
Os10g0514600	0	0.03	0	0.25	0.31	0.34	0.01	0.3	4.90689	0.000141644	0.000856403	Up	--
MSTRG.8062	0.07	0.07	0	1.03	2.46	0.7	0.0466667	1.39667	4.90345	2.76022e-06	2.64577e-05	Up	vignain precursor putative expressed
Os02g0112900	0.36	0.26	0.97	6.16	5.23	35.95	0.53	15.78	4.89596	4.73482e-07	5.45504e-06	Up	stress-induced protein putative expressed
MSTRG.21464	0.4	0.22	0.09	7.99	5.14	7.95	0.236667	7.02667	4.89191	2.15073e-25	2.3451e-23	Up	cell wall-associated hydrolase [Phaseolus vulgaris]
Os04g0634900	0.28	0.6	0.42	14.57	6.53	17.29	0.433333	12.7967	4.88415	4.21438e-21	3.30813e-19	Up	expressed protein
Os01g0729600	0	0	0.13	1.46	1.38	0.99	0.0433333	1.27667	4.88076	8.47547e-08	1.14444e-06	Up	--
Os04g0614500	0.26	0.23	0.46	5.51	10.04	12.33	0.316667	9.29333	4.87516	4.50514e-35	9.46909e-33	Up	ubiquitin family protein putative expressed
Os08g0272800	0	0.3	0.1	3.69	3.06	4.95	0.133333	3.9	4.87036	7.9741e-13	2.58374e-11	Up	glycosyl hydrolase putative expressed
Os03g0724600	1.27	2.25	1.39	53.18	49.21	40.84	1.63667	47.7433	4.86647	1.08826e-61	5.69961e-59	Up	--
Os07g0472900	0.12	0.39	0.12	5.82	7.98	4.57	0.21	6.12333	4.86586	5.90527e-15	2.56683e-13	Up	glutaredoxin putative expressed
MSTRG.8048	0	0	0.08	0.28	0.98	1.07	0.0266667	0.776667	4.86419	0.0137916	0.0427616	Up	PREDICTED: serine/threonine-protein phosphatase 7 long form homolog isoform X2 [Oryza sativa Japonica Group]
Os03g0168100	0	0.05	0.04	0.38	0.13	2.1	0.03	0.87	4.85798	4.76487e-05	0.000328928	Up	expressed protein
Os06g0492900	0	0	0.02	0.16	0.39	0.03	0.00666667	0.193333	4.85798	0.00674246	0.0236894	Up	peroxidase precursor putative expressed
Os11g0617700	0.04	0.04	0	0.64	0.62	1.05	0.0266667	0.77	4.85175	1.33413e-09	2.58164e-08	Up	cadmium tolerance factor putative expressed
Os02g0168200	0	0.38	0.15	3.41	3.73	8.13	0.176667	5.09	4.84856	1.5371e-11	4.12486e-10	Up	D-3-phosphoglycerate dehydrogenase chloroplast precursor putative expressed
Os06g0697200	0.09	0.31	0.05	3.6	4.76	4.48	0.15	4.28	4.83458	2.32173e-18	1.45441e-16	Up	pectinesterase inhibitor domain containing protein putative expressed
Os03g0790500	5.84	8.81	4.09	200.45	198.53	134.93	6.24667	177.97	4.8324	1.03329e-46	3.43871e-44	Up	OsSAUR30 - Auxin-responsive SAUR gene family member expressed
Os07g0604700	0	3.64	0.51	37.21	25.19	55.13	1.38333	39.1767	4.82377	0.00419174	0.0159066	Up	--
Os02g0772000	0.02	0.19	0.19	3.51	3.93	3.81	0.133333	3.75	4.81378	1.58495e-23	1.5206e-21	Up	expressed protein
Os01g0760000	3.82	5.95	7.21	99.82	132.86	235.31	5.66	155.997	4.78457	8.88022e-43	2.5865e-40	Up	BTBN18 - Bric-a-Brac Tramtrack Broad Complex BTB domain with non-phototropic hypocotyl 3 NPH3 domain expressed
Os04g0402200	0.04	0	0.01	0.21	0.27	0.89	0.0166667	0.456667	4.7761	1.00317e-06	1.06476e-05	Up	expressed protein
MSTRG.34791	0.04	0.08	0	1.91	0.87	0.49	0.04	1.09	4.76818	7.87606e-07	8.61432e-06	Up	Protein kinase domain containing protein expressed
Os10g0451900	0.11	0.11	0.04	1.73	3.13	2.22	0.0866667	2.36	4.76717	1.59453e-13	5.68549e-12	Up	oxysterol-binding protein putative expressed
Os11g0701500	1.02	1.16	0.61	37.45	31.02	7.21	0.93	25.2267	4.76158	1.29007e-18	8.25958e-17	Up	amino acid kinase putative expressed
MSTRG.5378	0.05	0	0	0.26	0.68	0.38	0.0166667	0.44	4.72247	0.00262526	0.010702	Up	expressed protein
Os11g0303600	0.05	0	0	0.47	0.16	0.68	0.0166667	0.436667	4.71149	0.000488326	0.0025442	Up	C2 domain containing protein putative expressed
MSTRG.8373	0	0	0.13	0.83	1.78	0.75	0.0433333	1.12	4.69188	3.73242e-05	0.00026599	Up	expressed protein
Os04g0502100	0.06	0.02	0	0.67	0.91	0.48	0.0266667	0.686667	4.6865	1.79803e-08	2.78852e-07	Up	--
Os09g0498500	4.61	4.41	5.24	162.01	146.21	58.68	4.75333	122.3	4.68534	4.51797e-40	1.18312e-37	Up	expressed protein
Os08g0189100	1.21	2.25	1.08	17.76	34.06	63.07	1.51333	38.2967	4.66142	1.22248e-22	1.1064e-20	Up	TKL_IRAK_DUF26-lh.10 - DUF26 kinases have homology to DUF26 containing loci expressed
Os03g0347500	0.42	0.04	0	2.54	7.56	1.5	0.153333	3.86667	4.65635	0.0060525	0.0216656	Up	endoglucanase putative expressed
Os01g0680100	0	0.05	0	0.4	0.84	0	0.0166667	0.413333	4.63227	0.0103874	0.03388	Up	--
Os10g0504500	0.04	0	0	0.14	0.52	0.32	0.0133333	0.326667	4.61471	0.00167134	0.00729455	Up	disease resistance RPP13-like protein 1 putative expressed
Os01g0944100	0.67	1.26	2.12	29.76	35.49	33.85	1.35	33.0333	4.61289	1.16559e-42	3.32484e-40	Up	flavonol sulfotransferase putative expressed
Os06g0589750	0	0	0.13	0.95	0.41	1.82	0.0433333	1.06	4.61244	3.06122e-05	0.000223593	Up	flowering promoting factor-like 1 putative expressed
Os03g0750000	0	0.19	0.08	1.52	2.77	2.3	0.09	2.19667	4.60925	1.66065e-10	3.77612e-09	Up	phosphate-induced protein 1 conserved region domain containing protein expressed
MSTRG.34407	0	0	0.07	1.15	0.35	0.2	0.0233333	0.566667	4.60204	0.00560366	0.0202908	Up	--
Os01g0730100	0.19	0.13	0.38	5.85	6.11	4.73	0.233333	5.56333	4.57549	2.07393e-31	3.58152e-29	Up	DNA binding protein putative expressed
MSTRG.4991	0	0.07	0	0.63	0.88	0.13	0.0233333	0.546667	4.5502	0.000315131	0.00173403	Up	expressed protein
Os08g0523200	0.48	0.11	0.52	7.48	8.39	9.61	0.37	8.49333	4.52073	1.16404e-27	1.5825e-25	Up	glutamate receptor putative expressed
Os02g0810600	0	0.06	0	0.34	0.66	0.37	0.02	0.456667	4.51307	0.00146155	0.00649967	Up	expressed protein
Os10g0204400	1.05	2.19	1.54	19.22	22.29	67.59	1.59333	36.3667	4.5125	2.23208e-21	1.81452e-19	Up	expressed protein
Os05g0588900	3.92	2.32	2.5	64.96	65.93	67.43	2.91333	66.1067	4.50405	7.84363e-74	5.22059e-71	Up	carrier putative expressed
MSTRG.5876	0	0.1	0	0.5	0.73	1.03	0.0333333	0.753333	4.49825	2.12086e-05	0.000160982	Up	peroxidase precursor putative expressed
Os08g0387050	0.14	0.12	0.23	2.21	2.51	6.31	0.163333	3.67667	4.49251	1.41752e-20	1.06558e-18	Up	--
Os03g0269300	0.04	0	0	0.24	0.33	0.33	0.0133333	0.3	4.49185	7.61844e-05	0.000498145	Up	--
MSTRG.2191	0	0.2	0	2.22	0.38	1.9	0.0666667	1.5	4.49185	0.000547451	0.00280063	Up	LTPL124 - Protease inhibitor Fseed storage FLTP family protein precursor expressed
Os04g0203450	0.08	0.12	0.1	2.87	1.69	2.18	0.1	2.24667	4.48971	2.61113e-17	1.45079e-15	Up	Similar to F-box domain containing protein expressed.
MSTRG.23646	0.19	0	0	0.79	2.3	1.17	0.0633333	1.42	4.48678	0.000130963	0.000800611	Up	cytokinin-O-glucosyltransferase 2 putative expressed
Os07g0674800	0.07	0.85	0.35	11.05	12.1	5.3	0.423333	9.48333	4.48553	1.26511e-12	3.96252e-11	Up	heat shock protein DnaJ putative expressed
Os05g0319875	0.18	0	0.02	0.97	2.58	0.9	0.0666667	1.48333	4.47573	1.02473e-06	1.08476e-05	Up	--
Os04g0339400	3.17	4.67	3.71	51.15	62.49	142.89	3.85	85.51	4.47316	6.27624e-31	1.06092e-28	Up	SNF2 domain-containing protein putative expressed
Os06g0662550	0.24	0.47	0.47	5.97	7.86	12.06	0.393333	8.63	4.45554	1.07781e-35	2.311e-33	Up	uvrD FREP helicase family protein putative expressed
Os02g0712512	0	0	0.06	0.63	0.27	0.41	0.02	0.436667	4.44846	0.000256366	0.00145069	Up	--
MSTRG.20770	0.04	0	0.03	0.31	0.75	0.46	0.0233333	0.506667	4.44057	1.23738e-05	9.93146e-05	Up	uncharacterized protein PA4923 putative expressed
Os07g0463500	0	0	0.11	0.93	1.14	0.31	0.0366667	0.793333	4.43539	0.000983626	0.00465071	Up	aldehyde dehydrogenase putative expressed
Os05g0473300	0.3	0.33	0.43	10.08	5.98	6.65	0.353333	7.57	4.42119	1.0908e-32	2.01439e-30	Up	expressed protein
Os08g0325134	0.05	0	0.08	0.48	1.01	1.29	0.0433333	0.926667	4.4185	1.64291e-06	1.65315e-05	Up	osFTL1 FT-Like1 homologous to Flowering Locus T gene%3B contains Pfam profile PF01161%3A Phosphatidylethanolamine-binding protein expressed
Os08g0136800	0.12	0.09	0	2.79	1.41	0.29	0.07	1.49667	4.41825	2.47454e-05	0.000184534	Up	expressed protein
MSTRG.31561	0.71	1.46	2.81	26.31	29.9	49.56	1.66	35.2567	4.40864	4.92511e-25	5.26019e-23	Up	--
MSTRG.14134	0	0	0.05	0.09	0.45	0.52	0.0166667	0.353333	4.40599	0.0125868	0.0396219	Up	--
Os04g0259150	0.16	0	0.22	2.68	3.38	1.98	0.126667	2.68	4.40312	1.26114e-06	1.30265e-05	Up	cysteine-rich repeat secretory protein precursor putative expressed
MSTRG.8593	0	0.09	0.13	1.19	1.99	1.47	0.0733333	1.55	4.40166	1.86905e-08	2.88605e-07	Up	fasciclin domain containing protein expressed
Os03g0595600	0.76	0.81	0.27	12.85	6.69	19.25	0.613333	12.93	4.39791	4.4799e-17	2.42583e-15	Up	peroxidase precursor putative expressed
Os10g0133500	0	0.03	0.02	0.17	0.25	0.63	0.0166667	0.35	4.39232	0.000202708	0.00117916	Up	plastocyanin-like domain containing protein putative expressed
Os11g0576400	0	0	0.04	0.29	0.28	0.27	0.0133333	0.28	4.39232	0.00128437	0.00583849	Up	ent-kaurene synthase chloroplast precursor putative expressed
Os10g0542750	0	0	0.05	0.63	0.3	0.11	0.0166667	0.346667	4.37851	0.00963563	0.031818	Up	remorin family protein putative expressed
Os05g0450300	0	0.13	0	1.03	0.65	1	0.0433333	0.893333	4.36565	0.000139432	0.000845369	Up	--
Os06g0147250	2.28	4.75	6.55	59.55	82.92	137.05	4.52667	93.1733	4.3634	4.45308e-27	5.71354e-25	Up	transferase family protein putative expressed
MSTRG.5015	2.35	2.66	3.81	53.04	67.24	60.11	2.94	60.13	4.3542	8.62567e-80	6.88932e-77	Up	--
MSTRG.33621	0	0.14	0.21	2.22	2.18	2.74	0.116667	2.38	4.3505	1.88397e-10	4.24764e-09	Up	signal peptide peptidase-like 2B putative expressed
Os11g0136300	0	0.23	0.16	2.65	3.13	2.16	0.13	2.64667	4.34759	2.71647e-08	4.04974e-07	Up	expressed protein
Os11g0595000	0	0	0.06	0.53	0.58	0.1	0.02	0.403333	4.3339	0.0161844	0.0486762	Up	expressed protein
MSTRG.1642	0.22	0.15	0.14	2.99	3.33	3.96	0.17	3.42667	4.3332	5.13243e-21	3.99929e-19	Up	--
Os05g0151000	0.03	0.01	0.04	0.35	0.59	0.67	0.0266667	0.536667	4.33092	5.98265e-15	2.59692e-13	Up	E1-E2 ATPase domain containing protein expressed
MSTRG.19215	0.08	0.45	0	3.83	3.84	2.99	0.176667	3.55333	4.33007	5.59031e-07	6.34231e-06	Up	tropinone reductase putative expressed
Os04g0373400	20.74	26.92	26.04	487.62	500.78	478.62	24.5667	489.007	4.31508	1.19955e-132	2.39521e-129	Up	Similar to DNA-binding WRKY.
MSTRG.32336	0	0.16	0.14	1.56	2.66	1.74	0.1	1.98667	4.31228	3.54611e-08	5.18021e-07	Up	glycosyl hydrolases family 17 putative expressed
Os08g0529000	0.04	0.1	0.02	1.16	0.93	1.08	0.0533333	1.05667	4.30834	2.66246e-10	5.86218e-09	Up	cytochrome P450 putative expressed
Os09g0283600	2.32	2.24	0.82	35.86	54.7	15.83	1.79333	35.4633	4.30561	7.27524e-18	4.31223e-16	Up	expressed protein
Os05g0142600	3.4	6.17	7.46	87.03	85.18	162.08	5.67667	111.43	4.29495	2.76178e-32	4.98493e-30	Up	UDP-glucoronosyl and UDP-glucosyl transferase putative expressed
Os02g0332450	0.07	0.04	0.12	1.06	1.14	2.31	0.0766667	1.50333	4.29342	1.0691e-15	5.07512e-14	Up	glycosyl hydrolases family 16 putative expressed
Os03g0282100	0	0	0.03	0.21	0.17	0.2	0.01	0.193333	4.27302	0.00155721	0.00686239	Up	peroxidase precursor putative expressed
Os01g0268600	0.21	0.28	0.51	5.4	7.78	6.14	0.333333	6.44	4.27202	2.12793e-37	4.82151e-35	Up	--
MSTRG.9693	0.16	0.35	0.34	3.78	6.07	6.5	0.283333	5.45	4.26568	5.83017e-27	7.33317e-25	Up	peptide transporter PTR3-A putative expressed
Os01g0746400	0.2	0.08	0.26	2.71	3.59	4.08	0.18	3.46	4.2647	1.88368e-23	1.78879e-21	Up	retrotransposon protein putative unclassified expressed
Os08g0178500	0	0	0.15	0.98	0.45	1.44	0.05	0.956667	4.25802	0.00171877	0.00746786	Up	protein binding protein putative expressed
Os07g0624900	0.29	0.23	0.32	5.23	7.61	3.21	0.28	5.35	4.25604	1.02425e-14	4.31131e-13	Up	C-5 cytosine-specific DNA methylase putative expressed
Os04g0458600	0.86	3.37	1.7	21.7	24.25	65.93	1.97667	37.2933	4.23778	1.29993e-15	6.11637e-14	Up	--
Os07g0637300	31.65	28.4	29.04	584.32	550.97	544.66	29.6967	559.983	4.23701	1.95628e-167	6.94435e-164	Up	--
Os08g0549900	0.49	0.41	0.31	8.14	7.06	7.6	0.403333	7.6	4.23595	4.51166e-31	7.74939e-29	Up	--
Os12g0595600	1.8	0.95	0	16.78	24.16	10.26	0.916667	17.0667	4.21864	0.00451261	0.0169374	Up	MYB family transcription factor putative expressed
Os11g0210201	9.64	14.08	9.05	215.5	174.68	218.57	10.9233	202.917	4.2154	3.84865e-60	1.86298e-57	Up	alcohol oxidase putative expressed
Os06g0147300	3.13	4.95	5.44	59.42	90.32	97.41	4.50667	82.3833	4.19222	1.72828e-47	6.27443e-45	Up	circadian clock coupling factor-related putative expressed
Os10g0205500	0.03	0	0.04	0.66	0.14	0.45	0.0233333	0.416667	4.15843	0.000149387	0.000895931	Up	MEGL13 - Maternally expressed gene MEG family protein precursor expressed
Os02g0775300	0.64	1.47	0.71	12.83	27.15	10.36	0.94	16.78	4.15794	3.11936e-18	1.90914e-16	Up	allene oxide cyclase 4 chloroplast precursor putative expressed
Os12g0614851	0.51	0.71	0.64	10.31	9.37	13.49	0.62	11.0567	4.1565	8.90558e-43	2.5865e-40	Up	Similar to DNA binding protein. (Os02t0767800-00)
Os03g0766600	0.72	2.02	0.65	21.18	9.37	29.39	1.13	19.98	4.14416	1.71228e-14	6.98646e-13	Up	expressed protein
Os05g0212900	0	0.05	0	0.14	0.12	0.62	0.0166667	0.293333	4.1375	0.00894945	0.0299452	Up	glycosyltransferase putative expressed
Os01g0171100	0	0.11	0.18	1.56	1.77	1.77	0.0966667	1.7	4.13637	6.73002e-10	1.36862e-08	Up	--
MSTRG.5648	0	0	0.1	0.54	0.48	0.73	0.0333333	0.583333	4.12928	0.000114736	0.00071204	Up	homeobox domain containing protein expressed
Os06g0142300	1.74	7.04	1.13	70.25	46.63	56.34	3.30333	57.74	4.12758	7.72317e-13	2.50497e-11	Up	--
MSTRG.20433	1.21	0.99	2.51	26.49	32.62	23.08	1.57	27.3967	4.12516	3.03046e-38	7.17164e-36	Up	osFTL11 FT-Like11 homologous to Flowering Locus T gene%3B contains Pfam profile PF01161%3A Phosphatidylethanolamine-binding protein expressed
Os11g0135900	2.96	3.29	3.42	59.82	57.91	50.25	3.22333	55.9933	4.11863	4.10397e-125	6.90072e-122	Up	--
Os11g0303800	0.61	0.83	1.01	8.99	13.36	20.08	0.816667	14.1433	4.11423	2.47974e-35	5.24655e-33	Up	exo70 exocyst complex subunit putative expressed
Os03g0204500	0.63	1.12	1.32	16.2	32	4.52	1.02333	17.5733	4.10204	4.07866e-10	8.6235e-09	Up	--
Os12g0455000	5.66	5.85	5.56	81.73	79.57	129.15	5.69	96.8167	4.08875	2.64019e-56	1.22245e-53	Up	DNA binding protein putative expressed
MSTRG.28981	0	0.22	0.41	3.21	3.03	4.47	0.21	3.57	4.08746	1.98774e-09	3.70719e-08	Up	expressed protein
Os03g0195800	15.4	14.21	20.49	298.53	294.05	258.06	16.7	283.547	4.08567	0.0125435	0.0395207	Up	cytochrome P450 putative expressed
Os09g0255200	0.55	0.61	0.37	21.85	1.38	2.74	0.51	8.65667	4.08524	8.62889e-06	7.24129e-05	Up	expressed protein
Os02g0110300	0.13	0.06	0	1.15	0.51	1.55	0.0633333	1.07	4.0785	0.000831165	0.00402395	Up	OsCML6 - Calmodulin-related calcium sensor protein expressed
Os01g0695900	0.28	0.16	0.15	3.26	3.54	3.08	0.196667	3.29333	4.06572	6.14212e-19	4.00466e-17	Up	IQ calmodulin-binding motif family protein putative expressed
Os10g0570800	0	0	0.12	0.5	0.34	1.16	0.04	0.666667	4.05889	0.00962624	0.0317968	Up	retrotransposon protein putative unclassified expressed
MSTRG.25111	0.13	0	0.04	0.66	0.89	1.28	0.0566667	0.943333	4.0572	7.82271e-07	8.5677e-06	Up	osMFT1 MFT-Like1 homologous to Mother of FT and TFL1 gene%3B contains Pfam profile PF01161%3A Phosphatidylethanolamine-binding protein expressed
MSTRG.29847	0	0.3	0	0.77	2.04	2.15	0.1	1.65333	4.04731	0.000776965	0.00379433	Up	AP2 domain containing protein expressed
Os02g0737200	0.97	1.43	2.65	22.52	20.81	39.35	1.68333	27.56	4.03318	2.68267e-21	2.14802e-19	Up	amino acid transporter putative expressed
Os03g0580200	0.26	0.21	0.6	6.96	8.64	1.67	0.356667	5.75667	4.01259	7.78836e-10	1.57383e-08	Up	LTPL81 - Protease inhibitor Fseed storage FLTP family protein precursor expressed
Os12g0508400	0.61	0.58	0.41	11.38	12.78	1.47	0.533333	8.54333	4.00169	8.62906e-09	1.41158e-07	Up	--
MSTRG.33430	0	0.03	0.09	0.68	0.58	0.66	0.04	0.64	4	2.45026e-06	2.37792e-05	Up	EF hand family protein putative expressed
Os11g0599101	0.03	0	0	0.06	0.08	0.34	0.01	0.16	4	0.00606429	0.0216956	Up	UDP-glucoronosyl FUDP-glucosyl transferase putative expressed
MSTRG.22003	0.15	0.09	0.15	1.72	2.07	2.42	0.13	2.07	3.99305	2.45237e-18	1.53323e-16	Up	receptor-like protein kinase 2 precursor putative expressed
Os09g0568700	0.06	0.05	0.34	2.27	3.59	1.29	0.15	2.38333	3.98995	5.58417e-08	7.83157e-07	Up	thaumatin putative expressed
Os05g0463000	0.77	1.05	0.93	21.21	13.61	8.41	0.916667	14.41	3.97453	4.00344e-28	5.78742e-26	Up	SCP-like extracellular protein expressed
Os06g0687200	0.35	0.33	0.13	3.61	4.22	4.84	0.27	4.22333	3.96735	1.16017e-19	8.14616e-18	Up	dnaJ domain containing protein expressed
Os01g0713800	0	0.05	0.26	1.56	1.54	1.73	0.103333	1.61	3.96168	1.07905e-06	1.134e-05	Up	--
MSTRG.1357	0.1	0	0.08	0.31	0.68	1.81	0.06	0.933333	3.95936	5.80114e-05	0.000390425	Up	ankyrin repeat family protein putative expressed
Os06g0142400	0	2.91	0.55	21.94	12.02	19.72	1.15333	17.8933	3.95554	0.0135033	0.0420185	Up	MYB family transcription factor putative expressed
Os10g0452300	0.39	0.34	0	4.27	3.72	3.28	0.243333	3.75667	3.94845	3.31284e-07	3.96846e-06	Up	S-locus-like receptor protein kinase putative expressed
MSTRG.25978	0.21	0	0	1.09	0.97	1.18	0.07	1.08	3.94753	0.00619597	0.0220925	Up	--
MSTRG.31248	0	0	0.1	0.5	0.44	0.6	0.0333333	0.513333	3.94486	0.000268843	0.00151268	Up	expressed protein
Os07g0127700	7.34	7.53	4.39	126.29	116.64	52.02	6.42	98.3167	3.93679	2.2678e-23	2.13721e-21	Up	--
Os07g0113600	0	0.03	0.1	0.71	0.62	0.66	0.0433333	0.663333	3.93618	3.65341e-06	3.39497e-05	Up	expressed protein
Os03g0828300	1.06	0.63	0.56	8.27	12.38	13.38	0.75	11.3433	3.91881	1.18898e-30	1.97842e-28	Up	zinc finger DHHC domain-containing protein putative expressed
MSTRG.33287	0	0.09	0.08	0.83	0.65	1.09	0.0566667	0.856667	3.91816	2.14452e-07	2.67839e-06	Up	expressed protein
Os11g0701600	2.18	1.73	1.72	56.27	15.91	12.63	1.87667	28.27	3.91303	1.25773e-12	3.94327e-11	Up	zinc finger protein putative expressed
MSTRG.11507	0.09	0	0.17	1.89	0.77	1.24	0.0866667	1.3	3.90689	3.73033e-07	4.41231e-06	Up	--
Os01g0898500	0.64	0.09	1.95	5.04	8.79	26.2	0.893333	13.3433	3.90078	0.000546238	0.00279532	Up	receptor-like protein kinase precursor putative expressed
MSTRG.10145	0.04	0.04	0	0.37	0.28	0.54	0.0266667	0.396667	3.89482	0.000231333	0.00132782	Up	aldose 1-epimerase putative expressed
MSTRG.8195	0.07	0.8	0.32	3.91	7.75	6.01	0.396667	5.89	3.89227	4.82519e-10	1.00427e-08	Up	expressed protein
Os01g0342500	0.87	0.25	0.28	5.97	8.6	6.21	0.466667	6.92667	3.8917	1.85385e-13	6.55165e-12	Up	expressed protein
Os01g0749000	0	0	0.06	0.49	0.25	0.15	0.02	0.296667	3.89077	0.00915287	0.030522	Up	RNA polymerase sigma factor putative expressed
Os08g0355400	0.03	0	0	0.06	0.14	0.24	0.01	0.146667	3.87447	0.0151634	0.0461678	Up	GDU1 putative expressed
Os01g0155000	28.13	41.51	24.87	536.87	522.59	322.38	31.5033	460.613	3.86998	2.44973e-36	5.39751e-34	Up	RING-H2 finger protein putative expressed
MSTRG.10117	0	0.42	0.46	3.86	5.27	3.72	0.293333	4.28333	3.86812	9.66599e-09	1.56438e-07	Up	ATCHX putative expressed
Os02g0582600	5.37	7	4.37	190.95	27.19	26.3	5.58	81.48	3.86811	3.33329e-05	0.000240714	Up	metallothionein putative expressed
Os09g0471000	0.2	0.39	0.2	3.61	3.83	4.09	0.263333	3.84333	3.8674	1.28892e-23	1.24684e-21	Up	transferase family protein putative expressed
Os11g0702300	0	0.17	0	0.62	0.74	1.11	0.0566667	0.823333	3.8609	0.00420921	0.0159634	Up	--
Os07g0558900	0.25	1.38	0.28	14.02	4.78	8.92	0.636667	9.24	3.85928	7.4285e-08	1.01508e-06	Up	RNA recognition motif containing protein putative expressed
Os10g0505700	1.66	3.95	2.15	12.67	80.05	18.99	2.58667	37.2367	3.84756	8.9679e-10	1.79291e-08	Up	CCT domain domain containing protein. (Os08t0119700-00)
Os03g0295866	0.38	0.33	0.34	5.51	4.61	4.99	0.35	5.03667	3.84704	1.49749e-37	3.44185e-35	Up	--
MSTRG.8672	0	0.48	0.12	3.09	2.85	2.67	0.2	2.87	3.84298	1.26599e-06	1.30724e-05	Up	BRCA1 C Terminus domain containing protein expressed
Os01g0360150	0.15	0.29	0.34	3.03	4.25	3.89	0.26	3.72333	3.84001	1.77905e-12	5.45985e-11	Up	retrotransposon protein putative unclassified expressed
Os06g0589700	0.38	0.19	0.09	3.23	2.55	3.67	0.22	3.15	3.83978	2.62841e-14	1.04704e-12	Up	bZIP transcription factor family protein putative expressed
Os02g0478900	0.04	0	0	0.14	0.07	0.36	0.0133333	0.19	3.83289	0.00700918	0.0244438	Up	expressed protein
Os10g0505900	0	0.09	0.08	1.2	0.43	0.79	0.0566667	0.806667	3.8314	5.07055e-06	4.53021e-05	Up	--
Os02g0743800	0.87	0.35	0.49	8.78	7.76	7.74	0.57	8.09333	3.8277	2.68469e-28	3.95255e-26	Up	harpin-induced protein 1 domain containing protein expressed
Os03g0723400	0.24	0.35	0.39	2.86	1.78	9.22	0.326667	4.62	3.822	2.5293e-09	4.59125e-08	Up	WD domain G-beta repeat domain containing protein expressed
Os01g0934900	0	0.17	0.41	1.78	2.8	3.59	0.193333	2.72333	3.81621	6.21231e-07	6.95901e-06	Up	--
Os01g0369200	0.42	0.38	0.4	5.32	6.35	5.23	0.4	5.63333	3.81592	1.60358e-51	6.56809e-49	Up	kinesin motor domain containing protein putative expressed
Os01g0524251	0.17	0.12	0.28	2.06	2.05	3.9	0.19	2.67	3.81277	4.56705e-14	1.7643e-12	Up	--
Os09g0483100	0.69	0.08	0.2	1.91	5.29	6.42	0.323333	4.54	3.8116	1.69075e-07	2.16498e-06	Up	--
Os12g0161500	0.61	0.92	1.29	10.12	14.64	14.7	0.94	13.1533	3.80662	8.31565e-37	1.85782e-34	Up	armadillo Fbeta-catenin repeat family protein putative expressed
Os03g0746000	0.03	0.05	0.07	0.51	0.76	0.82	0.05	0.696667	3.80047	3.6622e-08	5.32786e-07	Up	serine Fthreonine-protein kinase Haspin putative expressed
Os05g0515900	0.87	1.23	0.57	11.69	14.45	10.69	0.89	12.2767	3.78597	3.49049e-27	4.49654e-25	Up	SR protein related family member putative expressed
Os03g0140900	0.08	0.19	0.09	1.91	1.77	1.27	0.12	1.65	3.78136	6.4916e-12	1.83859e-10	Up	MLA10 putative expressed
MSTRG.19710	0	0	0.07	0.29	0.3	0.37	0.0233333	0.32	3.77761	0.00335622	0.0131713	Up	U-box domain containing protein expressed
Os08g0404900	1.04	1.54	1.53	18.03	22.85	15.48	1.37	18.7867	3.77746	9.40849e-39	2.27714e-36	Up	major facilitator superfamily antiporter putative expressed
Os01g0156300	0	0.33	0.16	2.87	2.62	1.16	0.163333	2.21667	3.7625	3.39153e-06	3.18216e-05	Up	expressed protein
Os03g0734300	65.67	80.93	90.38	754.98	763.58	1696.78	78.9933	1071.78	3.76213	2.50512e-30	4.10428e-28	Up	POLA1 - Putative DNA polymerase alpha catalytic subunit expressed
Os04g0635100	5.1	4.45	5.71	61.47	34.41	109.86	5.08667	68.58	3.753	2.37419e-22	2.06677e-20	Up	--
Os05g0469800	1.12	1.34	0.78	17.9	14.63	10.97	1.08	14.5	3.74695	8.22613e-33	1.53689e-30	Up	expressed protein
MSTRG.4052	0	0.32	0.05	0.9	0.95	3.11	0.123333	1.65333	3.74474	0.000166837	0.0009922	Up	--
Os08g0178600	0.09	0	0	0.32	0.34	0.54	0.03	0.4	3.73697	0.0123983	0.0391521	Up	expressed protein
Os02g0300700	32.23	39.29	20.76	453.54	380.96	395.14	30.76	409.88	3.73607	2.01172e-38	4.79629e-36	Up	C4-dicarboxylate transporter Fmalic acid transport protein domain containing protein expressed
Os09g0381400	9.6	20.05	7.58	193.69	194.2	104.76	12.41	164.217	3.72603	1.9379e-19	1.33431e-17	Up	retrotransposon protein putative Ty1-copia subclass expressed
Os03g0658800	0.77	0.09	0.07	7.05	3.99	1.26	0.31	4.1	3.72528	9.55603e-06	7.90718e-05	Up	zinc finger C3HC4 type domain containing protein expressed
MSTRG.912	0	0.09	0.23	1.65	2.35	0.21	0.106667	1.40333	3.71768	0.00146303	0.00650532	Up	expressed protein
Os01g0740700	1.02	0.94	1.14	8.97	11.14	20.67	1.03333	13.5933	3.71752	1.34227e-28	2.00387e-26	Up	--
Os09g0324200	0.16	0.21	0.16	2.97	1.98	2.02	0.176667	2.32333	3.71709	1.43254e-17	8.21424e-16	Up	metallothionein family protein expressed
Os02g0575000	22.88	32.69	31.28	520.27	376.52	244.38	28.95	380.39	3.71584	6.28919e-35	1.31325e-32	Up	KIP1 putative expressed
Os04g0624800	0.22	0.5	0.65	5.47	6.65	5.88	0.456667	6	3.71575	3.32694e-24	3.36358e-22	Up	expressed protein
Os02g0808800	0	0	0.16	0.58	0.69	0.83	0.0533333	0.7	3.71425	0.000778309	0.00379915	Up	OsSCP63 - Putative Serine Carboxypeptidase homologue expressed
Os03g0638400	0.3	0.34	0.51	2.41	3	9.66	0.383333	5.02333	3.71197	4.2573e-13	1.43171e-11	Up	lecithin%3Acholesterol acyltransferase putative expressed
Os04g0588500	4.41	3.91	4.67	57.13	50.37	62.34	4.33	56.6133	3.7087	4.39738e-112	5.6195e-109	Up	LRP1 putative expressed
Os01g0922700	0	0.11	0	0.46	0.44	0.53	0.0366667	0.476667	3.70044	0.0165826	0.0496004	Up	peroxidase precursor putative expressed
MSTRG.1827	0.13	0.48	0.34	3.25	4.92	4.05	0.316667	4.07333	3.68517	2.46426e-12	7.39928e-11	Up	thylakoid lumenal protein putative expressed
Os05g0414400	0.02	0.02	0.02	0.2	0.4	0.17	0.02	0.256667	3.68182	7.90241e-05	0.0005147	Up	expressed protein
Os02g0149600	0.42	0.53	0.61	5.89	7.55	6.55	0.52	6.66333	3.67966	7.72813e-47	2.62658e-44	Up	expressed protein
MSTRG.9810	0.19	0.27	0.17	2.64	2.47	2.92	0.21	2.67667	3.67198	1.88688e-23	1.78879e-21	Up	citrate transporter putative expressed
MSTRG.20771	0.26	0.09	0	1.49	1.62	1.35	0.116667	1.48667	3.67162	1.53986e-05	0.000120903	Up	expressed protein
Os03g0184400	0.07	0	0	0.23	0.44	0.22	0.0233333	0.296667	3.66838	0.00443782	0.0167075	Up	NC domain-containing protein putative expressed
Os12g0465000	0	0.2	0	0.33	0.65	1.55	0.0666667	0.843333	3.66107	0.00908037	0.030304	Up	--
Os05g0544600	0.47	0.52	0.61	5.2	6.78	8.23	0.533333	6.73667	3.65893	3.65083e-37	8.21385e-35	Up	dehydrogenase putative expressed
Os03g0176100	0.36	0.23	0.22	2.62	3.51	4.01	0.27	3.38	3.64599	1.8617e-15	8.54562e-14	Up	transporter major facilitator superfamily domain containing protein expressed
MSTRG.11870	0	0	0.19	1.1	0.13	1.13	0.0633333	0.786667	3.63472	0.00996438	0.0326974	Up	bile acid sodium symporter family protein putative expressed
MSTRG.32723	0.36	0.11	0.48	0.63	1.79	9.37	0.316667	3.93	3.63349	0.000144953	0.00087327	Up	NTMC2Type1.1 protein putative expressed
Os07g0580300	0.27	0.36	0.56	5.14	4.02	5.45	0.396667	4.87	3.61792	1.43469e-17	8.21424e-16	Up	ZOS3-09 - C2H2 zinc finger protein expressed
Os03g0145600	0.95	0.64	0.72	8.38	11.61	8.33	0.77	9.44	3.61586	5.06802e-34	1.01832e-31	Up	expressed protein
Os08g0156100	1.36	2.69	1.77	25.92	20.79	24.59	1.94	23.7667	3.61481	9.34571e-32	1.64959e-29	Up	aspartic proteinase nepenthesin precursor putative expressed
Os10g0156200	0.1	0	0.1	0.66	1.02	0.75	0.0666667	0.81	3.60288	0.000552091	0.00281941	Up	expressed protein
Os12g0639500	22.36	31.23	20.2	287.76	328.39	279.29	24.5967	298.48	3.6011	1.97968e-47	7.10638e-45	Up	Similar to F-box domain containing protein.
Os09g0564600	0.06	0.69	0.04	3.38	1.32	4.82	0.263333	3.17333	3.59104	6.55193e-05	0.000434477	Up	NADH dehydrogenase I subunit N putative expressed
MSTRG.5288	0	0	0.24	0.82	1.47	0.6	0.08	0.963333	3.58996	0.00908806	0.0303264	Up	glucose-1-phosphate adenylyltransferase large subunit putative expressed
Os03g0561400	0	0.14	0.14	0.76	0.91	1.69	0.0933333	1.12	3.58496	1.63616e-06	1.6474e-05	Up	stress responsive protein putative expressed
MSTRG.2071	0.1	0	0.05	0.47	0.75	0.58	0.05	0.6	3.58496	7.68528e-06	6.54745e-05	Up	ferredoxin-thioredoxin reductase variable chain putative expressed
Os06g0148100	0.11	0.14	0	1.73	0.88	0.39	0.0833333	1	3.58496	0.000850868	0.0041064	Up	OsSub11 - Putative Subtilisin homologue expressed
Os04g0617500	0.12	0.11	0.12	0.78	1.98	1.44	0.116667	1.4	3.58496	6.79837e-05	0.000449027	Up	--
MSTRG.111	0.12	0.15	0.16	2.08	1.69	1.38	0.143333	1.71667	3.58216	1.97958e-08	3.04349e-07	Up	zinc finger family protein putative expressed
Os05g0241100	1.09	1.46	1.95	16.67	13.28	22.73	1.5	17.56	3.54926	2.05968e-37	4.7002e-35	Up	peroxidase precursor putative expressed
Os02g0723600	0.16	0.31	0.43	3.62	2.86	4.05	0.3	3.51	3.54844	1.45252e-14	5.98004e-13	Up	--
Os02g0607500	0.03	0	0.06	0.31	0.5	0.24	0.03	0.35	3.54432	0.000380349	0.002045	Up	--
Os01g0638000	3.19	5.88	3.18	45.95	44.9	51.67	4.08333	47.5067	3.54031	1.74406e-31	3.02821e-29	Up	--
Os05g0456800	3.4	3.63	3.45	34.59	34.49	52.12	3.49333	40.4	3.53168	1.05445e-52	4.61472e-50	Up	expressed protein
MSTRG.10499	0.45	0.62	1.32	6.95	8.33	12.27	0.796667	9.18333	3.52697	7.37581e-21	5.6509e-19	Up	--
MSTRG.16386	0.25	0.36	0.3	4.46	3.4	2.62	0.303333	3.49333	3.52563	1.20938e-14	5.04808e-13	Up	expressed protein
Os09g0341600	1.86	1.38	1.9	13.66	15.2	29.33	1.71333	19.3967	3.50093	4.25834e-26	4.94711e-24	Up	ATOFP18 FOFP18 putative expressed
MSTRG.12581	0	0	0.47	3.32	1.26	0.74	0.156667	1.77333	3.50069	0.00856938	0.0288731	Up	expressed protein
Os08g0539200	0.62	0.42	0.2	3.83	5.66	4.52	0.413333	4.67	3.49804	1.30208e-13	4.67927e-12	Up	oleosin putative expressed
Os10g0474000	0.67	0.5	0.59	6.02	10.88	2.95	0.586667	6.61667	3.49549	3.46192e-12	1.01376e-10	Up	N-acetylglucosaminyltransferase putative expressed
Os03g0589300	0.02	0.02	0	0.13	0.04	0.28	0.0133333	0.15	3.49185	0.0054302	0.0197523	Up	PREDICTED: skin secretory protein xP2 [Oryza sativa Japonica Group]
Os07g0241700	1.42	2.23	0.97	19.22	16.95	15.57	1.54	17.2467	3.48532	8.5396e-24	8.39456e-22	Up	cytochrome P450 putative expressed
Os05g0215500	0	0	0.06	0.17	0.24	0.26	0.02	0.223333	3.48113	0.0145611	0.0446234	Up	bifunctional dihydrofolate reductase-thymidylate synthase putative expressed
Os09g0450600	0.9	0.67	0.36	7.95	5.41	8.11	0.643333	7.15667	3.47565	1.93622e-15	8.84957e-14	Up	expressed protein
Os06g0252300	13.28	11.14	15.71	143.9	143	159.41	13.3767	148.77	3.47529	8.73673e-103	9.62487e-100	Up	--
Os12g0154900	8.02	10.43	12.82	80.47	72.84	193.94	10.4233	115.75	3.47312	2.58283e-20	1.88825e-18	Up	jasmonate O-methyltransferase putative expressed
MSTRG.26159	0.09	0.08	0	0.45	0.51	0.92	0.0566667	0.626667	3.46713	0.000800095	0.00388661	Up	--
Os01g0363900	10.28	9.33	15.24	127.3	122.02	135.02	11.6167	128.113	3.46315	9.58508e-72	6.24947e-69	Up	CSLF8 - cellulose synthase-like family F%3B beta1 3%3B1 4 glucan synthase expressed
MSTRG.24660	1	0.1	0.2	2.99	4.13	7.2	0.433333	4.77333	3.46145	3.61655e-06	3.36463e-05	Up	receptor-like protein kinase 5 precursor putative expressed
MSTRG.2154	0	0	0.25	0.53	1.51	0.71	0.0833333	0.916667	3.45943	0.00441827	0.0166456	Up	expressed protein
MSTRG.28345	0	0	0.06	0.26	0.18	0.22	0.02	0.22	3.45943	0.0139395	0.0430946	Up	expressed protein
Os09g0544750	0	0	0.29	1.16	1.95	0.08	0.0966667	1.06333	3.45943	0.0165009	0.0494022	Up	GEM putative expressed
Os09g0482800	1.11	2.36	1.46	19.04	20.03	14.86	1.64333	17.9767	3.45143	9.04898e-24	8.868e-22	Up	expressed protein
Os04g0558200	0.08	0	0.19	1.06	0.96	0.93	0.09	0.983333	3.44968	2.01198e-05	0.000153446	Up	PREDICTED: jacalin-related lectin 3-like [Oryza sativa Japonica Group]
Os04g0659200	4.43	3.75	4.72	58.13	42.57	40.24	4.3	46.98	3.44964	3.01716e-61	1.53003e-58	Up	auxin response factor 5 putative expressed
Os02g0782500	1.62	1.22	1.28	20.46	14.84	9.7	1.37333	15	3.44921	1.41252e-22	1.25353e-20	Up	zinc finger C-x8-C-x5-C-x3-H type family protein expressed
Os04g0476600	0.15	0.46	0.22	2.11	2.55	4.38	0.276667	3.01333	3.44514	1.38151e-12	4.2851e-11	Up	Similar to DVL4/RTFL17 (ROTUNDIFOLIA LIKE 17).
Os03g0183900	0.03	0.03	0.11	0.61	0.72	0.51	0.0566667	0.613333	3.4361	2.58191e-06	2.49046e-05	Up	DUF623 domain containing protein expressed
MSTRG.29076	1.21	1.5	1.86	10.76	11.55	27.15	1.52333	16.4867	3.436	2.22806e-17	1.24662e-15	Up	transferase family protein putative expressed
Os09g0120033	0.26	0.48	0.63	3.65	5.58	5.57	0.456667	4.93333	3.43335	1.48296e-18	9.41898e-17	Up	thaumatin family domain containing protein expressed
Os03g0296200	0	0.09	0.35	1.1	1.84	1.79	0.146667	1.57667	3.42626	5.36796e-05	0.00036504	Up	--
Os07g0409500	0.25	0.3	0.19	2.31	2.72	2.9	0.246667	2.64333	3.42172	5.967e-13	1.95924e-11	Up	oxidoreductase short chain dehydrogenase Freductase family domain containing protein expressed
Os02g0232900	3.28	4.28	3.85	38.33	60.2	23.46	3.80333	40.6633	3.41839	8.01733e-23	7.33919e-21	Up	expressed protein
Os04g0588350	0	0.3	0.45	2.15	2.47	3.38	0.25	2.66667	3.41504	4.57937e-06	4.14101e-05	Up	--
Os03g0816700	0.07	0.13	0	0.57	0.78	0.77	0.0666667	0.706667	3.40599	0.00106695	0.00498129	Up	GDSL-like lipase Facylhydrolase putative expressed
Os06g0146500	0.55	0.38	0.61	6.1	5.71	4.36	0.513333	5.39	3.39232	6.56081e-19	4.26026e-17	Up	--
MSTRG.19461	0.04	0.19	0.69	2.63	3.5	3.51	0.306667	3.21333	3.38933	3.24419e-07	3.89351e-06	Up	eukaryotic aspartyl protease domain containing protein expressed
MSTRG.10058	0.48	0.73	0.72	6.46	7.47	6.28	0.643333	6.73667	3.3884	8.84053e-22	7.45217e-20	Up	expressed protein
Os11g0147150	1.95	2.41	5.97	22.19	27.71	57.93	3.44333	35.9433	3.38385	6.02668e-14	2.26785e-12	Up	expressed protein
Os11g0518300	0.1	0.04	0	0.41	0.43	0.62	0.0466667	0.486667	3.38247	0.000957106	0.00454813	Up	3-hydroxyacyl-CoA dehydrogenase putative expressed
Os08g0486500	0.31	0.04	0.12	0.81	2.26	1.82	0.156667	1.63	3.3791	1.49486e-06	1.5166e-05	Up	POEI50 - Pollen Ole e I allergen and extensin family protein precursor expressed
Os05g0470900	0	0	0.1	0.26	0.4	0.38	0.0333333	0.346667	3.37851	0.0067907	0.023804	Up	purple acid phosphatase precursor putative expressed
Os01g0939500	2.04	2.88	2.55	23.9	29.96	23.75	2.49	25.87	3.37706	5.13775e-46	1.64141e-43	Up	glutathione S-transferase putative expressed
Os09g0526700	2.39	2.33	2.79	13.2	21.76	42.51	2.50333	25.8233	3.36675	4.93932e-18	2.95508e-16	Up	ribosomal protein L6 putative expressed
Os08g0539600	0.2	0.88	0.88	8.36	6.78	5.05	0.653333	6.73	3.36472	1.24049e-12	3.9002e-11	Up	OsFBX307 - F-box domain containing protein expressed
Os03g0432100	1.88	2.29	3.87	23.12	20.72	38.87	2.68	27.57	3.36279	6.80139e-26	7.66512e-24	Up	expressed protein
Os02g0216000	0	0.03	0.04	0.18	0.25	0.29	0.0233333	0.24	3.36257	9.52242e-05	0.000607351	Up	calmodulin-binding protein putative expressed
Os01g0695800	8.49	14.61	12.34	140.1	114.61	108.81	11.8133	121.173	3.35858	7.99348e-40	2.04301e-37	Up	WAX2 putative expressed
Os03g0794200	16.04	41.05	22.22	353.1	344.95	113.58	26.4367	270.543	3.35525	4.6039e-13	1.53374e-11	Up	scarecrow transcription factor family protein putative expressed
Os06g0196200	0.61	0.51	0.62	3.57	8.98	5.15	0.58	5.9	3.34659	8.61971e-13	2.77603e-11	Up	expressed protein
Os12g0488900	1.11	1.99	1.77	15.64	17.21	16.64	1.62333	16.4967	3.34514	3.2539e-39	8.05858e-37	Up	--
Os02g0514150	0.12	0.28	0.39	1.53	3.11	3.32	0.263333	2.65333	3.33284	1.47534e-06	1.49823e-05	Up	--
Os09g0323500	0.21	0.23	0	1.07	1.24	2.11	0.146667	1.47333	3.32847	0.00014545	0.000875603	Up	expressed protein
Os03g0127500	1.15	1.1	0.95	15.97	9.52	6.52	1.06667	10.67	3.32238	8.26474e-20	5.8676e-18	Up	expressed protein
MSTRG.12687	0	0.11	0.12	0.38	0.69	1.23	0.0766667	0.766667	3.32193	7.66739e-05	0.000501141	Up	SCO1 protein homolog mitochondrial precursor putative expressed
Os01g0910900	7.15	23.86	70.23	144.57	85.28	780.73	33.7467	336.86	3.31933	0.00481756	0.0178946	Up	plastocyanin-like domain containing protein putative expressed
Os06g0540050	0.22	0	0	0.66	1.07	0.46	0.0733333	0.73	3.31536	0.015367	0.0466634	Up	UDP-glucoronosyl and UDP-glucosyl transferase domain containing protein expressed
Os09g0515550	0.29	0.55	1.21	6.75	10.24	3.39	0.683333	6.79333	3.31346	6.4818e-07	7.2229e-06	Up	--
Os06g0610600	0.9	0.91	0.99	9.69	11.12	6.87	0.933333	9.22667	3.30535	3.88412e-19	2.62346e-17	Up	expressed protein
Os04g0635500	5.02	7.46	4.9	54.37	27.73	89.57	5.79333	57.2233	3.30414	1.46612e-15	6.84791e-14	Up	--
Os04g0494100	0.87	2.27	0.53	7.41	14.07	14.76	1.22333	12.08	3.30373	5.94501e-10	1.22064e-08	Up	--
MSTRG.31311	0.21	0	0.24	1.32	1.44	1.67	0.15	1.47667	3.29931	4.85159e-06	4.36002e-05	Up	RING-H2 finger protein ATL5D putative expressed
MSTRG.26543	0.24	0.31	0.51	3.37	3.69	3.33	0.353333	3.46333	3.29306	1.21455e-12	3.82666e-11	Up	NB-ARC domain containing disease resistance protein putative expressed
Os01g0773800	0.25	0.09	0.1	1.33	1.34	1.64	0.146667	1.43667	3.29211	2.01438e-07	2.53069e-06	Up	expressed protein
Os11g0577700	0	0	0.06	0.12	0.19	0.27	0.02	0.193333	3.27302	0.004147	0.0157743	Up	aldose 1-epimerase putative expressed
MSTRG.26250	0.17	0.17	0.48	0.8	1.68	5.44	0.273333	2.64	3.2718	1.45112e-07	1.88227e-06	Up	glucan endo-1 3-beta-glucosidase precursor putative expressed
Os03g0230300	11.02	11.83	10.82	97.99	105.86	121.15	11.2233	108.333	3.2709	7.55862e-74	5.13793e-71	Up	glucan endo-1 3-beta-glucosidase precursor putative expressed
Os03g0338000	35.58	26.1	22.9	311.46	276.33	227.72	28.1933	271.837	3.26931	2.56313e-39	6.39741e-37	Up	expressed protein
Os08g0425100	0.03	0	0.08	0.47	0.44	0.15	0.0366667	0.353333	3.26849	0.000801552	0.00389238	Up	ribulose bisphosphate carboxylase large chain precursor putative expressed
MSTRG.8417	0.07	0.13	0.07	0.93	0.81	0.86	0.09	0.866667	3.26748	1.20109e-08	1.92467e-07	Up	cytochrome P450 putative expressed
Os12g0427600	0.04	0	0.04	0.15	0.49	0.13	0.0266667	0.256667	3.26679	0.00252406	0.0103635	Up	TCP family transcription factor putative expressed
Os02g0720400	2.52	1.16	1.84	19.94	16	17.15	1.84	17.6967	3.2657	4.22632e-28	6.0637e-26	Up	expressed protein
MSTRG.7029	0.13	0.09	0.12	0.77	1.4	1.1	0.113333	1.09	3.26568	6.69764e-09	1.12324e-07	Up	peroxidase precursor putative expressed
Os08g0167249	0	0	0.26	0.45	1.25	0.8	0.0866667	0.833333	3.26534	0.0142661	0.0439173	Up	expressed protein
MSTRG.4196	0.16	0.11	0.37	1.46	1.52	3.14	0.213333	2.04	3.25739	1.04536e-07	1.38577e-06	Up	--
Os01g0880850	0	0.05	0.11	0.33	0.36	0.84	0.0533333	0.51	3.25739	0.00359633	0.0139799	Up	--
Os08g0499400	0.64	0.7	0.75	5.93	6.53	7.45	0.696667	6.63667	3.25192	1.09191e-31	1.91673e-29	Up	--
Os05g0177500	0.05	0.09	0.04	0.41	0.87	0.43	0.06	0.57	3.24793	1.15135e-05	9.32638e-05	Up	expressed protein
Os01g0106400	102.4	101.46	48.49	801.36	860.19	734.18	84.1167	798.577	3.24697	1.2918e-23	1.24684e-21	Up	FAD dependent oxidoreductase domain containing protein expressed
Os03g0196600	1.27	1.96	1.58	20.13	13.53	11.87	1.60333	15.1767	3.24271	2.24407e-26	2.67513e-24	Up	3-ketoacyl-CoA synthase putative expressed
Os11g0128500	0	0.04	0.03	0.07	0.34	0.25	0.0233333	0.22	3.23704	0.0167417	0.0499958	Up	--
MSTRG.30824	0.43	0.26	0.29	3.37	3.1	2.76	0.326667	3.07667	3.23548	1.44473e-09	2.78218e-08	Up	expressed protein
MSTRG.31508	0	0.15	0.09	0.56	0.78	0.92	0.08	0.753333	3.23522	6.26399e-05	0.000417966	Up	--
Os02g0537450	0.13	0	0	0.33	0.6	0.29	0.0433333	0.406667	3.2303	0.0139546	0.0431286	Up	RNA recognition motif containing protein putative expressed
MSTRG.21576	0.22	0.33	0.13	1.9	3.02	1.46	0.226667	2.12667	3.22995	7.39081e-08	1.01079e-06	Up	solute carrier family 35 member F1 putative expressed
Os12g0111400	0	0.09	0.36	2.13	1.83	0.26	0.15	1.40667	3.22925	0.00472543	0.0176077	Up	expressed protein
Os05g0404700	0.87	1.27	0.79	8.39	5.71	13.16	0.976667	9.08667	3.21781	9.19843e-15	3.90268e-13	Up	expressed protein
Os09g0421700	0	0	0.17	0.57	0.74	0.27	0.0566667	0.526667	3.21632	0.0104564	0.0340705	Up	expressed protein
Os01g0696600	9.79	10.41	17.39	76.68	75.17	197.43	12.53	116.427	3.21596	1.98515e-16	1.01964e-14	Up	expressed protein
Os07g0661000	5.67	6.49	6.76	55.7	55.9	63.63	6.30667	58.41	3.21127	1.36464e-78	1.06336e-75	Up	BBTI10 - Bowman-Birk type bran trypsin inhibitor precursor expressed
Os05g0544750	0	0.4	0.15	1.08	0.96	3.04	0.183333	1.69333	3.20732	0.000435055	0.00230347	Up	cytokinin dehydrogenase precursor putative expressed
MSTRG.28814	0	0.04	0.06	0.34	0.36	0.22	0.0333333	0.306667	3.20163	0.00535783	0.0195308	Up	--
Os08g0153750	3.05	3.56	1.8	24.22	32.35	20.62	2.80333	25.73	3.19824	1.088e-18	6.97979e-17	Up	NB-ARC domain containing protein expressed
Os12g0154800	7.52	11.15	10.19	65.12	65.66	134.01	9.62	88.2633	3.19771	3.83999e-22	3.29785e-20	Up	Os12bglu38 - beta-glucosidase Fbeta-mannosidase Fexoglucanase homologue expressed
MSTRG.28828	0.19	0	0.11	0.64	1.28	0.83	0.1	0.916667	3.1964	0.000295993	0.00164345	Up	pectinesterase putative expressed
Os01g0313300	1.33	2.7	2	18.24	19.15	17.61	2.01	18.3333	3.1892	7.97867e-27	9.91839e-25	Up	expressed protein
Os11g0592100	108.66	182.43	140.17	1007.16	1043.72	1879.99	143.753	1310.29	3.18822	2.76099e-24	2.80918e-22	Up	expressed protein
Os01g0518400	0.13	0.12	0.16	1.01	1.5	1.22	0.136667	1.24333	3.18548	1.02979e-13	3.76857e-12	Up	expressed protein
Os02g0638650	0.68	1.32	1.79	6.54	13.69	14.18	1.26333	11.47	3.18256	9.79135e-16	4.67585e-14	Up	receptor-like protein kinase putative expressed
MSTRG.12280	0	0	0.14	0.31	0.24	0.72	0.0466667	0.423333	3.18133	0.0135747	0.0422077	Up	carrier putative expressed
Os04g0507400	0.29	0.3	0.49	3.36	4.24	2.13	0.36	3.24333	3.17141	1.06937e-13	3.89556e-12	Up	ribosomal protein L7 FL12 C-terminal domain containing protein expressed
Os04g0597600	1.39	2.83	2.48	12.8	17.12	30.43	2.23333	20.1167	3.17112	2.13866e-17	1.20081e-15	Up	--
Os09g0466300	1.22	0.54	0.91	6.97	6.9	10.06	0.89	7.97667	3.16391	5.39005e-19	3.55054e-17	Up	transferase family protein putative expressed
Os02g0672500	0.06	0.04	0.07	0.43	0.64	0.45	0.0566667	0.506667	3.16046	1.8193e-06	1.81521e-05	Up	--
Os02g0724100	0.11	0	0.04	0.65	0.63	0.06	0.05	0.446667	3.1592	0.0152913	0.0464856	Up	--
MSTRG.32937	0.11	0.05	0.22	0.84	1.34	1.21	0.126667	1.13	3.15721	1.47137e-07	1.90391e-06	Up	expressed protein
Os03g0799300	0.09	0.08	0.06	0.39	0.44	1.22	0.0766667	0.683333	3.15592	0.00228125	0.00952425	Up	retrotransposon protein putative unclassified expressed
Os01g0682700	0.13	0.17	0.23	1.54	1.19	1.99	0.176667	1.57333	3.15472	3.49711e-13	1.18731e-11	Up	expressed protein
Os09g0364400	2.79	7.25	7.64	50.01	73.11	34.31	5.89333	52.4767	3.15452	3.59839e-15	1.60785e-13	Up	ZOS1-23 - C2H2 zinc finger protein expressed
MSTRG.9768	0.5	0.51	0.78	3.82	4.67	7.39	0.596667	5.29333	3.14918	2.84197e-22	2.45393e-20	Up	expressed protein
Os04g0493400	0.21	0.69	0.04	4.69	1.72	1.91	0.313333	2.77333	3.14585	0.000175249	0.00103644	Up	CESA4 - cellulose synthase expressed
Os05g0486300	0.12	0.02	0.06	0.82	0.55	0.4	0.0666667	0.59	3.14568	1.98473e-06	1.96675e-05	Up	--
Os04g0511200	0.17	0.69	0.54	2.93	3.55	5.9	0.466667	4.12667	3.14451	2.05096e-09	3.80954e-08	Up	peroxidase precursor putative expressed
Os09g0309700	10.27	8.69	9.24	93.81	83.29	71.71	9.4	82.9367	3.14128	1.23211e-62	6.56056e-60	Up	OsFBO18 - F-box and other domain containing protein expressed
Os02g0533800	23.4	21.57	16.91	162.86	173.24	208.58	20.6267	181.56	3.13786	4.97618e-43	1.47203e-40	Up	glycosyl hydrolase family 29 putative expressed
Os01g0515300	0	0	0.05	0.1	0.15	0.19	0.0166667	0.146667	3.1375	0.015262	0.046427	Up	expressed protein
Os01g0586800	2.81	2.77	3.36	14.44	18.79	44.81	2.98	26.0133	3.12587	4.73702e-14	1.81582e-12	Up	MATE efflux family protein putative expressed
Os10g0157400	0.13	0.09	0	0.82	0.58	0.52	0.0733333	0.64	3.12553	0.000975727	0.00461678	Up	--
MSTRG.29112	0	0.27	0.56	1.71	2.33	3.2	0.276667	2.41333	3.12481	7.75668e-05	0.000505942	Up	homeobox associated leucine zipper putative expressed
Os11g0451700	0.05	0.13	0.03	0.07	0.11	1.65	0.07	0.61	3.12338	0.0133073	0.0415243	Up	ATPase 3 putative expressed
Os11g0172350	0	0.1	0.1	0.29	0.32	1.13	0.0666667	0.58	3.12102	0.00334725	0.0131406	Up	expressed protein
MSTRG.19603	0.14	0.1	0.05	0.64	1.02	0.86	0.0966667	0.84	3.1193	9.8929e-07	1.05212e-05	Up	S1 RNA binding domain containing protein expressed
MSTRG.33295	0.15	0.12	0.21	1.45	1.1	1.62	0.16	1.39	3.11894	9.76398e-11	2.30214e-09	Up	DNA binding protein putative expressed
Os06g0507300	0.14	0.41	0.31	2.76	2.43	2.24	0.286667	2.47667	3.11095	2.07018e-09	3.83854e-08	Up	LTPL114 - Protease inhibitor Fseed storage FLTP family protein precursor expressed
MSTRG.5617	0.16	0	0.18	0.26	0.46	2.21	0.113333	0.976667	3.10729	0.01132	0.0363709	Up	glycosyltransferase putative expressed
Os03g0305400	0.17	1.46	0.73	6.28	2.88	11.15	0.786667	6.77	3.10533	4.17538e-06	3.81893e-05	Up	--
MSTRG.17170	0	0	0.22	0.77	0.66	0.44	0.0733333	0.623333	3.08746	0.0125541	0.0395463	Up	DEF8 - Defensin and Defensin-like DEFL family expressed
Os12g0154700	17.32	20.25	18.89	132.77	114	232.39	18.82	159.72	3.08521	1.14096e-26	1.39128e-24	Up	OsWAK17 - OsWAK short gene expressed
MSTRG.7640	0	0	0.37	1.16	1.4	0.58	0.123333	1.04667	3.08517	0.0107726	0.0349439	Up	enoyl-CoA hydratase Fisomerase family protein expressed
MSTRG.2734	0	0.06	0.11	0.5	0.31	0.63	0.0566667	0.48	3.08246	0.000581789	0.00295326	Up	SCP-like extracellular protein expressed
Os01g0124600	0.55	1.11	0.84	5.46	7.73	7.86	0.833333	7.01667	3.07382	5.26773e-14	2.01308e-12	Up	expressed protein
Os01g0137400	0.07	0.06	0.03	0.57	0.22	0.55	0.0533333	0.446667	3.06609	0.00010405	0.000654111	Up	expressed protein
MSTRG.17319	0	0.07	0.09	0.31	0.56	0.47	0.0533333	0.446667	3.06609	0.000225607	0.00129892	Up	expressed protein
Os03g0184100	0.82	0.93	1.09	6.56	8.65	8.51	0.946667	7.90667	3.06214	4.0853e-30	6.59178e-28	Up	Myb transcription factor putative expressed
Os11g0701000	0.24	0.04	0.15	2.69	0.42	0.46	0.143333	1.19	3.05352	0.000682945	0.00339606	Up	--
Os08g0534300	1.85	2.43	2.94	18.2	15.6	26.11	2.40667	19.97	3.05273	7.03048e-22	5.97367e-20	Up	seven in absentia protein family domain containing protein expressed
Os04g0578550	1.23	0.55	0.94	7.34	7.92	7.27	0.906667	7.51	3.05017	4.66445e-19	3.11106e-17	Up	Similar to nodulin protein. (Os02t0103500-00)
MSTRG.21469	0.19	0.3	0.04	2.8	0.59	0.98	0.176667	1.45667	3.04357	0.00271074	0.0110028	Up	DUF623 domain containing protein expressed
Os12g0614800	1.01	0.46	1.46	6.08	5.13	12.94	0.976667	8.05	3.04305	5.5937e-11	1.37256e-09	Up	keratin-associated protein 5-4 putative expressed
MSTRG.27712	0	0.09	0.33	0.76	0.7	2	0.14	1.15333	3.04231	0.00410497	0.0156461	Up	DUF740 domain containing protein expressed
Os08g0534950	1.73	2.1	2.79	16.74	13.68	24.11	2.20667	18.1767	3.04215	3.7878e-20	2.73784e-18	Up	cytochrome P450 86A2 putative expressed
Os12g0517100	0.05	0.4	0.41	2.13	3.15	1.77	0.286667	2.35	3.03521	1.87141e-07	2.36971e-06	Up	receptor-like protein kinase precursor putative expressed
Os05g0177400	0.32	0.31	0.38	3.21	2.86	2.19	0.336667	2.75333	3.03179	2.93989e-14	1.16099e-12	Up	ATOFP18 FOFP18 putative expressed
Os07g0550600	0.5	0.2	0.38	2.54	3.59	2.7	0.36	2.94333	3.03138	2.28824e-14	9.1495e-13	Up	--
Os06g0698400	0	0.09	0.29	1.02	1.59	0.48	0.126667	1.03	3.02354	0.00197818	0.00843551	Up	OsFBO23 - F-box and other domain containing protein expressed
MSTRG.5408	0.03	0.11	0.13	0.67	0.49	1.03	0.09	0.73	3.0199	5.56615e-06	4.91779e-05	Up	OsRR1 type-A response regulator expressed
Os11g0219400	0.16	0.03	0.33	0.74	1.59	1.85	0.173333	1.39333	3.00692	8.80015e-06	7.36952e-05	Up	growth regulating factor protein putative expressed
Os03g0845300	0.19	0.26	0.5	2.28	2.87	2.47	0.316667	2.54	3.00379	3.14804e-12	9.26945e-11	Up	expressed protein
Os06g0656700	3.36	3.34	1.33	26.34	24.82	13.18	2.67667	21.4467	3.00224	6.84811e-12	1.93101e-10	Up	AMP-binding domain containing protein expressed
Os01g0681100	0.28	0.1	0.11	1.2	1.63	1.09	0.163333	1.30667	3	9.8427e-10	1.95071e-08	Up	Os11bglu36 SFR2 homologue expressed
Os02g0537400	0.44	0.19	0.25	2.37	3.05	1.62	0.293333	2.34667	3	1.06832e-10	2.50042e-09	Up	expressed protein
Os08g0288500	8.45	7.04	9.98	69.46	62.42	71.87	8.49	67.9167	2.99993	1.34323e-75	9.75307e-73	Up	ER lumen protein retaining receptor putative expressed
Os07g0633300	0.23	0.4	0.33	2.28	2.91	2.45	0.32	2.54667	2.99247	1.85791e-13	6.55874e-12	Up	STE_MEK_ste7_MAP2K.1 - STE kinases include homologs to sterile 7 sterile 11 and sterile 20 from yeast expressed
Os10g0329400	0.47	0.77	1.08	4.36	3.69	10.4	0.773333	6.15	2.99142	2.37359e-10	5.27847e-09	Up	oxidoreductase aldo Fketo reductase family protein putative expressed
Os03g0388800	0.15	0.25	0.13	2.6	1.27	0.34	0.176667	1.40333	2.98976	9.50875e-05	0.000606601	Up	expressed protein
Os02g0318200	0.07	0.26	0.24	2.04	1.32	1.15	0.19	1.50333	2.98409	2.70321e-07	3.3127e-06	Up	Similar to CLE family OsCLE302 protein.
Os10g0116800	0.58	0.37	0.4	4.08	3.11	3.49	0.45	3.56	2.98388	2.13368e-16	1.09067e-14	Up	expressed protein
MSTRG.29377	0.12	0.11	0.14	0.71	0.58	1.62	0.123333	0.97	2.97542	6.08787e-05	0.000407887	Up	expressed protein
Os01g0793600	0.2	0.97	0.54	1.27	2.36	9.79	0.57	4.47333	2.97232	0.000555261	0.00283288	Up	ABC transporter ATP-binding protein putative expressed
Os04g0476650	0.07	0.14	0.1	0.47	0.69	1.27	0.103333	0.81	2.97062	1.37236e-05	0.000108983	Up	--
MSTRG.23410	0.05	0.17	0.08	0.94	0.7	0.71	0.1	0.783333	2.96963	2.40239e-06	2.33785e-05	Up	zinc finger C3HC4 type domain containing protein expressed
Os01g0672100	16.09	16.28	14.42	116.48	129.28	120.69	15.5967	122.15	2.96934	7.37705e-63	3.99461e-60	Up	oxidoreductase short chain dehydrogenase Freductase family domain containing protein expressed
Os12g0191400	1.13	0.59	1.13	5.26	8.68	8.38	0.95	7.44	2.9693	7.37857e-18	4.36538e-16	Up	cytochrome P450 putative expressed
Os02g0554200	0.8	0.9	0.33	8.97	4.85	2.02	0.676667	5.28	2.96402	3.3231e-06	3.12622e-05	Up	protein kinase putative expressed
Os03g0295932	0	0.15	0.41	1.49	1.99	0.88	0.186667	1.45333	2.96083	0.00434817	0.0164222	Up	hypothetical protein
Os01g0587500	0.78	0.83	0.55	4.98	10.32	1.5	0.72	5.6	2.95936	5.66549e-06	4.99038e-05	Up	--
Os01g0318202	0.97	0.97	1.2	10.47	6.14	7.66	1.04667	8.09	2.95034	5.58844e-27	7.0849e-25	Up	tryptophan Ftyrosine permease family protein putative expressed
Os12g0639400	1.21	1.45	0.95	8.85	10.12	8.89	1.20333	9.28667	2.94812	1.51097e-26	1.8285e-24	Up	light-induced protein 1-like putative expressed
Os02g0561800	1.05	1.03	0.63	8.36	7.08	5.37	0.903333	6.93667	2.94091	3.64914e-17	1.98947e-15	Up	expressed protein
Os02g0559800	0.78	0.63	0.44	5.3	5.03	3.84	0.616667	4.72333	2.93724	2.63508e-16	1.3384e-14	Up	expressed protein
Os01g0191400	0.06	0.17	0.12	0.75	0.88	1.04	0.116667	0.89	2.93141	2.28641e-09	4.20235e-08	Up	expressed protein
Os01g0124550	0.37	0.29	0.55	0.93	1.02	7.25	0.403333	3.06667	2.92663	2.63034e-05	0.00019502	Up	expressed protein
MSTRG.27033	0.07	0.17	0.11	0.93	0.94	0.79	0.116667	0.886667	2.926	3.25529e-10	7.03654e-09	Up	3-5 exonuclease domain-containing protein putative expressed
Os03g0168500	0.81	0.83	0.65	3.35	4.23	9.79	0.763333	5.79	2.92318	5.22865e-08	7.39136e-07	Up	Os4bglu14 - monolignol beta-glucoside homologue without catalytic acid Fbase expressed
Os11g0533400	0.3	0	0.18	1.16	0.98	1.49	0.16	1.21	2.91886	0.000510765	0.00264301	Up	--
Os01g0627967	3.49	5.78	3.95	29.91	39.91	30.15	4.40667	33.3233	2.91877	1.29693e-25	1.43371e-23	Up	GATA zinc finger domain containing protein expressed
Os05g0531100	30.36	35	30.46	202.34	221.59	299.93	31.94	241.287	2.91731	1.71705e-39	4.35367e-37	Up	--
Os03g0240600	1.15	1.08	1.54	7.4	9.76	11.26	1.25667	9.47333	2.91427	4.23252e-28	6.0637e-26	Up	--
Os05g0206100	2.92	3.27	4.32	20.24	24.19	34.37	3.50333	26.2667	2.90643	2.62979e-25	2.8577e-23	Up	expressed protein
Os04g0569100	2.18	1.78	2.51	15.38	13.52	19.1	2.15667	16	2.8912	4.63182e-43	1.38297e-40	Up	transferase family domain containing protein expressed
Os05g0555600	0.04	0.38	0.68	2.11	2.3	3.75	0.366667	2.72	2.89107	8.13018e-06	6.87265e-05	Up	--
Os09g0327575	0.09	0.03	0.05	0.36	0.33	0.57	0.0566667	0.42	2.88982	0.000354215	0.00191967	Up	Similar to Subtilisin protease (Fragment).
MSTRG.19390	1.5	1.05	0.95	10.12	8.34	7.46	1.16667	8.64	2.88864	8.39215e-18	4.94672e-16	Up	expressed protein
Os01g0370900	0.46	0.7	1.05	4	3.91	8.43	0.736667	5.44667	2.88629	1.4913e-09	2.85979e-08	Up	expressed protein
MSTRG.33077	0.42	0.34	0.3	2.46	2.5	2.87	0.353333	2.61	2.88495	2.28873e-21	1.85585e-19	Up	expressed protein
Os01g0909150	0.11	0.22	0.34	1.58	1.56	1.8	0.223333	1.64667	2.88228	8.06309e-08	1.09524e-06	Up	ELMO FCED-12 family protein putative expressed
Os11g0159500	0	0.04	0.07	0.17	0.38	0.26	0.0366667	0.27	2.88042	0.00707522	0.0246445	Up	disease resistance protein RPM1 putative expressed
Os01g0802700	2.01	2.42	2.22	18.12	15.64	15.07	2.21667	16.2767	2.87634	4.39897e-44	1.36445e-41	Up	retrotransposon protein putative unclassified expressed
Os10g0571600	8.3	9.22	6.46	47.56	72.96	55.28	7.99333	58.6	2.87403	1.5361e-26	1.85189e-24	Up	--
MSTRG.11358	0	0.08	0.23	0.49	0.96	0.82	0.103333	0.756667	2.87235	0.00685551	0.0239943	Up	--
Os04g0414500	0.24	0	0.14	0.33	1.38	1.06	0.126667	0.923333	2.86581	0.00551746	0.0200332	Up	ankyrin repeat family protein putative expressed
Os06g0536100	0.41	0.68	0.75	4.85	5.09	3.46	0.613333	4.46667	2.86446	1.51195e-14	6.20072e-13	Up	--
Os12g0155000	6.48	8.59	12.65	38.27	41.3	122.21	9.24	67.26	2.86378	3.52856e-11	8.93269e-10	Up	flavonol synthase Fflavanone 3-hydroxylase putative expressed
Os05g0157600	1.47	1.59	1.71	11.01	11.71	11.94	1.59	11.5533	2.86121	7.18948e-48	2.70223e-45	Up	expressed protein
Os10g0400100	30.66	36.45	34.63	242.18	237.04	259.43	33.9133	246.217	2.86	1.07113e-69	6.58087e-67	Up	aldehyde oxidase putative expressed
Os03g0820300	2.4	2.92	2.54	13.41	19.66	23.98	2.62	19.0167	2.85963	4.22359e-22	3.60789e-20	Up	expressed protein
Os05g0536250	0.2	0.11	0.07	0.96	0.76	1.03	0.126667	0.916667	2.85536	5.54989e-06	4.90614e-05	Up	cytochrome P450 putative expressed
Os03g0807600	0.73	1.74	1.84	5.18	7	19	1.43667	10.3933	2.85486	5.08811e-08	7.21184e-07	Up	receptor-like protein kinase 2 precursor putative expressed
Os01g0225000	0.11	0.62	0.3	2.06	2.71	2.68	0.343333	2.48333	2.8546	7.85918e-07	8.60175e-06	Up	sulfated surface glycoprotein 185 precursor putative expressed
Os01g0779201	1.25	0.36	0.33	6.72	4.94	2.36	0.646667	4.67333	2.85336	0.000239569	0.0013687	Up	--
Os12g0565800	0.06	0.27	0.5	1.55	1.82	2.62	0.276667	1.99667	2.85137	5.35437e-07	6.11151e-06	Up	POLE2B - Putative DNA polymerase epsilon complex subunit expressed
Os05g0421450	0.42	0.52	0.64	2.15	3.17	6.08	0.526667	3.8	2.85104	1.36823e-06	1.40193e-05	Up	protein kinase family protein putative expressed
Os12g0143800	1.28	1.34	1.95	12.35	12.7	7.89	1.52333	10.98	2.84957	1.41034e-22	1.25353e-20	Up	hydrolase NUDIX family domain containing protein expressed
MSTRG.8627	0	1.08	0.13	2.57	1.59	4.55	0.403333	2.90333	2.84767	0.0080091	0.027337	Up	peptide transporter PTR2 putative expressed
Os11g0181200	0.14	0.58	0.19	2.71	1.78	2.06	0.303333	2.18333	2.84756	2.83625e-05	0.000208737	Up	expansin precursor putative expressed
Os01g0314000	0.52	0.56	0.6	3.15	3.89	5.04	0.56	4.02667	2.84609	3.64807e-19	2.47449e-17	Up	zinc-binding protein putative expressed
Os03g0234500	4.06	4.82	3.69	28.15	24.17	38.02	4.19	30.1133	2.84538	4.87026e-28	6.91533e-26	Up	--
MSTRG.19602	0.28	0.06	0.17	1.2	1.18	1.28	0.17	1.22	2.84327	6.40184e-07	7.15126e-06	Up	yippee zinc-binding protein putative expressed
MSTRG.12523	0.16	0.08	0.19	0.54	1.21	1.33	0.143333	1.02667	2.84052	5.49883e-06	4.86639e-05	Up	expressed protein
Os12g0151000	2.31	2.65	3.83	12.05	20.8	29.77	2.93	20.8733	2.83269	2.05034e-16	1.04975e-14	Up	translation initiation factor IF-3 putative expressed
Os02g0560600	0.23	0.24	0.14	1.7	1.54	1.1	0.203333	1.44667	2.83081	4.88887e-08	6.93868e-07	Up	expressed protein
Os09g0419500	0.5	0.54	0.67	4.6	5.03	2.53	0.57	4.05333	2.83007	5.53746e-14	2.10962e-12	Up	NBS-LRR disease resistance protein putative expressed
Os01g0233800	0.08	0.08	0.13	0.41	0.9	0.75	0.0966667	0.686667	2.82852	2.97385e-06	2.82763e-05	Up	poly synthetase 2-B putative expressed
Os03g0808000	0.15	0.42	0.24	0.03	2.37	3.35	0.27	1.91667	2.82757	0.00556148	0.0201701	Up	--
Os07g0555100	0.34	0.47	0.63	4.51	3.77	1.93	0.48	3.40333	2.82584	5.51877e-11	1.3573e-09	Up	thylakoid lumenal protein putative expressed
Os01g0716800	3.97	2.72	3.3	21.61	24.22	24.84	3.33	23.5567	2.82254	4.58981e-42	1.28627e-39	Up	purine permease putative expressed
Os04g0633800	0	0.07	0.1	0.3	0.64	0.26	0.0566667	0.4	2.81943	0.0018934	0.0081153	Up	expressed protein
Os02g0630250	0.69	0.18	0.62	2.3	2.45	5.76	0.496667	3.50333	2.81838	5.74164e-06	5.0505e-05	Up	No apical meristem protein putative expressed
Os11g0145200	0.07	0.28	0.23	0.72	1.29	2.07	0.193333	1.36	2.81444	8.51535e-06	7.15917e-05	Up	histidine kinase putative expressed
Os04g0659300	134.65	205.44	216.77	1898.9	802.52	1212.56	185.62	1304.66	2.81325	3.11171e-18	1.90812e-16	Up	ubiquitin family protein putative expressed
Os02g0582800	18.92	22.61	18.26	143.28	153.53	123.09	19.93	139.967	2.81207	1.77187e-41	4.71732e-39	Up	fasciclin domain containing protein expressed
MSTRG.31676	0.38	0.07	0.05	1.52	1.06	0.93	0.166667	1.17	2.81147	0.000342775	0.00186622	Up	cytochrome P450 putative expressed
Os02g0561000	0.09	0.13	0.08	0.84	0.71	0.55	0.1	0.7	2.80735	3.60171e-05	0.000257537	Up	cytochrome P450 72A1 putative expressed
MSTRG.26326	0.29	0	0.12	1.29	0.6	0.97	0.136667	0.953333	2.80232	0.0012075	0.0055451	Up	--
Os02g0686800	2.34	6.11	4.56	27.51	35.82	27.36	4.33667	30.23	2.80132	9.64853e-16	4.61454e-14	Up	transmembrane amino acid transporter protein putative expressed
Os12g0125000	0.58	0.43	0.76	3.53	4.43	4.37	0.59	4.11	2.80035	7.44606e-16	3.60435e-14	Up	gibberellin 20 oxidase 2 putative expressed
Os01g0137250	0.05	0	0.42	0.98	0.87	1.42	0.156667	1.09	2.79856	0.00415745	0.0158028	Up	--
Os12g0191901	3.98	3.73	1.49	23.98	21	18.87	3.06667	21.2833	2.79498	1.72312e-11	4.59518e-10	Up	pro-resilin precursor putative expressed
MSTRG.30031	1.87	2.53	1.04	9.35	10.57	17.78	1.81333	12.5667	2.79289	1.43477e-11	3.87145e-10	Up	serine Fthreonine-protein kinase receptor precursor putative expressed
Os02g0194600	0.06	0	0.08	0.32	0.16	0.49	0.0466667	0.323333	2.79256	0.00414451	0.0157667	Up	expressed protein
Os02g0560200	0.27	0.26	0.15	1.83	1.68	1.2	0.226667	1.57	2.79212	3.80943e-08	5.51694e-07	Up	no apical meristem protein putative expressed
Os11g0153000	1.3	2.22	0.76	10	12.12	7.43	1.42667	9.85	2.78748	6.5256e-10	1.33129e-08	Up	OsFBX51 - F-box domain containing protein expressed
Os11g0139600	0.09	0.01	0.1	0.27	0.39	0.72	0.0666667	0.46	2.7866	0.000440678	0.00233054	Up	beta-expansin precursor putative expressed
Os03g0724700	20.87	24.37	20.03	145.59	141.91	162.8	21.7567	150.1	2.78639	7.86203e-49	3.06312e-46	Up	cyclin putative expressed
Os06g0553200	0.06	0.06	0.06	0.72	0.3	0.22	0.06	0.413333	2.78427	0.00584514	0.021027	Up	DUF538 family protein [Zea mays]
Os01g0289100	0	0.32	0.3	0.68	1.14	2.45	0.206667	1.42333	2.7839	0.00496733	0.0183591	Up	expressed protein
Os01g0583300	0.39	0.43	0.77	3.56	3.47	3.91	0.53	3.64667	2.78251	7.22437e-18	4.29004e-16	Up	expressed protein
Os07g0407900	0.47	1.36	1.25	4.25	5.67	11.21	1.02667	7.04333	2.77829	1.25239e-08	2.00157e-07	Up	expressed protein
Os01g0816100	14.32	18.33	12.48	108	105.99	95.35	15.0433	103.113	2.77703	1.06188e-32	1.97238e-30	Up	calmodulin binding protein putative expressed
Os03g0756500	0.07	0	0.06	0.34	0.31	0.24	0.0433333	0.296667	2.77529	0.0101887	0.0333443	Up	expressed protein
Os07g0593400	0.49	0.4	0.78	3.88	3.61	3.94	0.556667	3.81	2.77491	2.866e-13	9.84546e-12	Up	expressed protein
Os07g0604300	1.45	1.13	1.41	9.3	10.66	7.33	1.33	9.09667	2.77391	1.05934e-27	1.45252e-25	Up	retrotransposon protein putative unclassified expressed
Os06g0636100	0.96	0.94	1.39	7.97	7.63	6.9	1.09667	7.5	2.77377	5.06832e-26	5.84559e-24	Up	expressed protein
MSTRG.19282	0.09	0.18	0.09	0.88	0.7	0.88	0.12	0.82	2.77259	0.00131381	0.0059495	Up	COBRA-like protein precursor putative expressed
Os01g0137550	0	0.08	0.46	1.56	0.55	1.58	0.18	1.23	2.77259	0.00790418	0.0270491	Up	--
Os02g0219050	0.12	0.04	0.03	0.28	0.46	0.55	0.0633333	0.43	2.7633	0.00150717	0.00666727	Up	expressed protein
Os11g0601950	0	0.11	0.38	0.49	1.07	1.76	0.163333	1.10667	2.76033	0.00288576	0.0116011	Up	--
Os08g0527800	0.21	0.05	0.31	1.36	1.38	1.12	0.19	1.28667	2.75957	8.21238e-08	1.11362e-06	Up	--
MSTRG.3181	0.45	0.25	0.61	2.94	3.61	2.3	0.436667	2.95	2.75611	6.55418e-11	1.59355e-09	Up	cysteine protease putative expressed
Os06g0600301	1.27	1.22	1.05	7.05	9.38	7.46	1.18	7.96333	2.75459	2.13764e-17	1.20081e-15	Up	PPR repeat containing protein expressed
Os07g0217600	1.97	3.02	1.64	5.79	11.99	26.79	2.21	14.8567	2.74899	3.70251e-08	5.37917e-07	Up	--
Os07g0638100	58.02	68.85	53.7	424.23	528.57	258.65	60.19	403.817	2.7461	9.65691e-21	7.32824e-19	Up	--
Os01g0547600	0.75	0.08	0.48	2.51	2.05	4.21	0.436667	2.92333	2.74301	6.90207e-06	5.96288e-05	Up	MYB family transcription factor putative expressed
MSTRG.30534	0.7	1.02	0.4	5.07	5.69	3.43	0.706667	4.73	2.74274	3.52768e-09	6.2301e-08	Up	soluble inorganic pyrophosphatase putative expressed
Os12g0594600	3.12	5.44	2.01	24.5	28.32	17.8	3.52333	23.54	2.7401	9.87354e-12	2.73819e-10	Up	OsHKT1%3B5 - Na B transporter expressed
Os08g0155900	16.88	24.68	16.23	111.12	140.79	134.12	19.2633	128.677	2.73982	3.16629e-26	3.71899e-24	Up	PREDICTED: (+)-germacrene D synthase-like isoform X1 [Oryza sativa Japonica Group]
MSTRG.25823	0	0.41	0.23	1.54	1.33	1.4	0.213333	1.42333	2.73809	0.00144199	0.00642253	Up	--
Os03g0283200	3.42	3.99	2.42	20.35	24.64	20.57	3.27667	21.8533	2.73755	2.46092e-22	2.13645e-20	Up	--
Os12g0283400	0.61	0.56	0.43	3.38	4.42	2.87	0.533333	3.55667	2.73742	1.02242e-12	3.25665e-11	Up	invertase Fpectin methylesterase inhibitor family protein putative expressed
Os04g0547600	0.14	0.06	0.04	0.37	0.34	0.89	0.08	0.533333	2.73697	0.00131612	0.00595892	Up	phosphoribosyl transferase putative expressed
Os07g0687900	0.53	1.82	1.17	5.4	6.81	11.24	1.17333	7.81667	2.73594	3.24462e-09	5.78132e-08	Up	wax synthase isoform 1 putative expressed
Os01g0880800	3.59	6.35	7.98	48.59	37.84	32.76	5.97333	39.73	2.73362	6.03643e-20	4.32403e-18	Up	--
MSTRG.6230	0	0.12	0.08	0.42	0.53	0.38	0.0666667	0.443333	2.73335	0.00831599	0.0281499	Up	TTL3 putative expressed
Os11g0202450	0	0.15	0.19	0.64	0.79	0.83	0.113333	0.753333	2.73272	0.0015911	0.00698821	Up	expressed protein
MSTRG.2432	0.31	0.12	0	1.2	1.14	0.51	0.143333	0.95	2.72855	0.00715811	0.0248708	Up	mTERF domain containing protein expressed
Os03g0152500	0	0.12	0.2	0.37	0.98	0.76	0.106667	0.703333	2.7211	0.00523416	0.0191548	Up	diacylglycerol kinase catalytic domain family protein expressed
Os08g0156000	8.08	9.3	8.17	56.62	38.95	72.9	8.51667	56.1567	2.7211	4.53295e-23	4.19764e-21	Up	GATA zinc finger domain containing protein expressed
Os03g0415500	0.61	1.11	0.63	4.45	6.72	4.32	0.783333	5.16333	2.7206	1.50893e-11	4.05785e-10	Up	--
Os11g0549605	0.36	0.6	0.56	2.56	2.81	4.63	0.506667	3.33333	2.71786	4.65627e-14	1.7966e-12	Up	--
MSTRG.755	0	0.44	0.28	1.45	2.42	0.86	0.24	1.57667	2.71577	0.00300332	0.0119923	Up	B-box zinc finger family protein putative expressed
Os02g0102300	44.6	36.82	29.04	275.63	232.45	216.96	36.82	241.68	2.71454	2.48304e-29	3.81385e-27	Up	tetratricopeptide repeat domain containing protein expressed
MSTRG.5037	0.15	0.19	0.33	1.78	1.57	1.04	0.223333	1.46333	2.71199	0.000108465	0.000678261	Up	expressed protein
Os02g0774200	21.74	26.13	30.05	104.01	137.93	267.64	25.9733	169.86	2.70924	1.38081e-15	6.45888e-14	Up	type I inositol-1 4 5-trisphosphate 5-phosphatase putative expressed
Os02g0694700	0.12	0.12	0.21	1	1.04	0.9	0.15	0.98	2.70782	1.37287e-08	2.17453e-07	Up	CSLA6 - cellulose synthase-like family A%3B mannan synthase expressed
Os11g0514500	24.78	28.78	26.03	131.94	197.68	189.16	26.53	172.927	2.70446	3.85507e-33	7.41939e-31	Up	WRKY105 expressed
Os07g0249900	0.9	1.61	0.66	3.8	4.68	12.18	1.05667	6.88667	2.70429	1.44803e-06	1.47284e-05	Up	peptide transporter PTR2 putative expressed
Os01g0873200	1.92	1.64	2.37	10.68	17.62	10.33	1.97667	12.8767	2.70362	2.67029e-21	2.14348e-19	Up	expressed protein
Os09g0327500	0.07	0.04	0.28	1.01	0.67	0.86	0.13	0.846667	2.70328	0.000303641	0.00167803	Up	helix-loop-helix DNA-binding domain containing protein expressed
MSTRG.2182	0	0.71	0.53	2.58	1.47	4	0.413333	2.68333	2.69865	0.00180978	0.00781407	Up	TKL_IRAK_DUF26-lh.9 - DUF26 kinases have homology to DUF26 containing loci expressed
Os10g0407200	1.09	1.24	1.13	7.89	8.64	5.93	1.15333	7.48667	2.69851	6.24214e-19	4.06158e-17	Up	peroxidase precursor putative expressed
Os11g0579900	0.6	0.18	0.5	2.77	3.3	2.23	0.426667	2.76667	2.69697	3.35609e-11	8.51631e-10	Up	expressed protein
Os08g0136700	0.47	0.53	0.55	7.52	2.27	0.21	0.516667	3.33333	2.68966	0.00176456	0.00764605	Up	actin-depolymerizing factor putative expressed
Os08g0154225	0.08	0.11	0.1	0.54	0.47	0.86	0.0966667	0.623333	2.68891	1.15039e-05	9.32096e-05	Up	--
Os03g0826800	15.86	14.02	10.97	75.56	96.3	91	13.6167	87.62	2.68589	1.44182e-29	2.24699e-27	Up	--
Os02g0305950	1.04	2.1	1.74	8.16	6.82	16.42	1.62667	10.4667	2.68581	5.48812e-09	9.38119e-08	Up	auxin-responsive protein putative expressed
Os05g0107900	3.27	2.22	3.47	21.6	23.04	12.98	2.98667	19.2067	2.685	4.45025e-18	2.67753e-16	Up	proteophosphoglycan ppg4 putative expressed
Os03g0156600	0	0.17	0.09	0.69	0.47	0.51	0.0866667	0.556667	2.68326	0.00914345	0.0305017	Up	stress responsive A FB Barrel domain containing protein expressed
MSTRG.1851	0.14	0.23	0.32	1.14	2.17	1.11	0.23	1.47333	2.67938	5.74517e-07	6.49033e-06	Up	ribosomal protein L3 putative expressed
Os01g0129600	0.48	0.62	0.95	5.33	2.13	5.63	0.683333	4.36333	2.67477	1.59243e-08	2.48534e-07	Up	DUF260 domain containing protein putative expressed
Os11g0701400	0.72	0.74	1.04	9.29	5.73	0.93	0.833333	5.31667	2.67356	3.9066e-05	0.000276675	Up	carrier putative expressed
Os05g0367900	1.06	1.67	1.74	10.1	11.12	7.18	1.49	9.46667	2.66754	1.42947e-17	8.21381e-16	Up	desaturase Fcytochrome b5 protein putative expressed
MSTRG.1830	0.14	0.24	0.19	0.68	1.24	1.7	0.19	1.20667	2.66696	1.7835e-06	1.78283e-05	Up	expressed protein
Os05g0444200	3.78	5.3	4.44	20.31	28.24	37.31	4.50667	28.62	2.66689	3.53195e-21	2.78614e-19	Up	Similar to Oxidoreductase short chain dehydrogenase/reductase family protein expressed.
Os03g0176800	0.55	0.31	0.11	1.77	2.07	2.32	0.323333	2.05333	2.66687	7.9775e-07	8.70441e-06	Up	aminotransferase classes I and II domain containing protein expressed
Os03g0809200	0.07	0	0.19	0.52	0.71	0.42	0.0866667	0.55	2.66588	0.00552329	0.0200498	Up	HEAT repeat family protein putative expressed
Os05g0194500	5.42	6.16	4.85	35.01	30.87	38.34	5.47667	34.74	2.66523	5.07706e-36	1.10341e-33	Up	CSLA11 - cellulose synthase-like family A expressed
Os09g0549300	0.99	0.74	0.97	5.38	6.49	5.21	0.9	5.69333	2.66128	5.07957e-24	5.08721e-22	Up	ATP synthase B chain chloroplast precursor putative expressed
Os01g0629500	0.12	0.34	0.29	2.05	2.2	0.49	0.25	1.58	2.65992	0.000554124	0.00282843	Up	--
MSTRG.33247	0.14	0.14	0.13	0.12	0.92	1.55	0.136667	0.863333	2.65926	0.00482465	0.0179168	Up	DUF803 domain containing putative expressed
MSTRG.8132	0.06	0.06	0.08	0.62	0.23	0.41	0.0666667	0.42	2.65535	0.00100776	0.00473958	Up	CHIT15 - Chitinase family protein precursor putative expressed
Os04g0635000	1.71	6.6	3.89	38.38	19.13	19.3	4.06667	25.6033	2.65441	3.92584e-08	5.67267e-07	Up	vacuolar ATP synthase subunit E putative expressed
Os04g0573000	0.48	0.34	0.74	2.16	2.45	5.21	0.52	3.27333	2.65418	3.08916e-10	6.7001e-09	Up	--
Os07g0209700	1.03	0.6	1.09	6.42	6.23	4.46	0.906667	5.70333	2.65316	3.70276e-13	1.25446e-11	Up	no apical meristem protein putative expressed
Os08g0480400	0.48	0.35	0.55	3	2.79	2.89	0.46	2.89333	2.65303	3.51117e-13	1.19081e-11	Up	sulfotransferase domain containing protein expressed
Os06g0539801	0.05	0.14	0.06	0.62	0.6	0.35	0.0833333	0.523333	2.65076	0.0127148	0.0399618	Up	receptor protein kinase putative expressed
Os02g0233200	0.45	0.82	0.61	4.16	4.56	3.08	0.626667	3.93333	2.64998	5.45116e-12	1.56332e-10	Up	WRKY106 expressed
Os01g0175400	0.41	0.31	0.38	1.67	2.56	2.67	0.366667	2.3	2.64909	6.60933e-11	1.60452e-09	Up	expressed protein
Os01g0696701	0.99	0.71	1.14	3.46	4.54	9.79	0.946667	5.93	2.6471	1.47725e-08	2.32374e-07	Up	protein kinase domain containing protein expressed
Os12g0617250	1.86	2.68	2.57	9.35	14.45	20.73	2.37	14.8433	2.64686	2.26756e-15	1.0305e-13	Up	glutathione S-transferase GSTU6 putative expressed
Os12g0161100	0.37	0.69	0.54	1.85	3.01	5.15	0.533333	3.33667	2.6453	3.68853e-08	5.36372e-07	Up	kinesin motor domain containing protein putative expressed
Os08g0404500	3.35	6.61	4.17	33.49	29.45	25.45	4.71	29.4633	2.64512	9.96491e-18	5.80947e-16	Up	superoxide dismutase chloroplast putative expressed
Os03g0655100	1.04	1.79	1.44	9.91	7.67	9.13	1.42333	8.90333	2.64507	2.80017e-18	1.73708e-16	Up	OsMADS14 - MADS-box family gene with MIKCc type-box expressed
Os09g0109600	1.91	1.69	1.09	8.37	7.1	13.86	1.56333	9.77667	2.64472	8.24491e-11	1.96573e-09	Up	--
Os12g0516900	0.21	0.23	0.28	1.53	1.52	1.45	0.24	1.5	2.64386	1.55806e-14	6.38166e-13	Up	expressed protein
Os03g0724800	0.05	0.05	0.14	0.58	0.58	0.34	0.08	0.5	2.64386	0.000268195	0.0015101	Up	phosphate transporter 1 putative expressed
Os08g0544400	0.88	0.98	0.99	1.94	5.53	10.33	0.95	5.93333	2.64284	2.8012e-07	3.42082e-06	Up	exostosin family domain containing protein expressed
Os04g0450000	6.23	5.77	3.63	36.52	33.98	26.76	5.21	32.42	2.63753	3.0194e-19	2.06561e-17	Up	domain of unknown function DUF250 domain containing protein expressed
Os12g0636700	1.34	2.27	1.85	12.73	12.93	8.27	1.82	11.31	2.63559	1.52333e-15	7.08405e-14	Up	DUF630 FDUF632 domains containing protein putative expressed
Os02g0491600	0.35	0.21	0.83	2.57	2.38	3.67	0.463333	2.87333	2.6326	4.11124e-06	3.77214e-05	Up	cytochrome P450 putative expressed
Os12g0197100	1.11	1.45	1.03	6.71	5.9	9.62	1.19667	7.41	2.63045	4.33623e-18	2.61385e-16	Up	expressed protein
Os06g0549900	24.84	41.1	40.49	139.71	174.95	343.24	35.4767	219.3	2.62796	6.60264e-14	2.46715e-12	Up	peroxidase precursor putative expressed
Os09g0491596	0.65	0.26	0.71	3.03	4.92	2.05	0.54	3.33333	2.62593	6.02679e-07	6.7678e-06	Up	flowering promoting factor-like 1 putative expressed
Os07g0692950	0	0.02	0.04	0.12	0.07	0.18	0.02	0.123333	2.62449	0.0159657	0.0481787	Up	expressed protein
Os07g0673400	0.52	0.34	0.28	1.85	2.48	2.68	0.38	2.33667	2.62038	4.34334e-08	6.23084e-07	Up	--
MSTRG.15191	0.21	0.19	0.25	1.25	1.01	1.73	0.216667	1.33	2.61788	3.06481e-08	4.5247e-07	Up	glycosyl hydrolase family 10 protein putative expressed
Os12g0162800	2.38	3.66	4.03	18.83	21.93	20.99	3.35667	20.5833	2.61638	8.2871e-28	1.15111e-25	Up	OsFBX82 - F-box domain containing protein expressed
Os12g0512800	1.24	0.74	0.97	4.44	8.85	4.78	0.983333	6.02333	2.61481	7.32517e-13	2.38801e-11	Up	--
Os06g0148700	0.28	0.4	0.44	2.69	3.09	1.08	0.373333	2.28667	2.61471	3.19734e-07	3.84162e-06	Up	ELMO FCED-12 family protein putative expressed
Os06g0650900	4.19	6.63	5.66	24.24	31.61	45.04	5.49333	33.63	2.614	3.32789e-18	2.029e-16	Up	3-methyl-2-oxobutanoate hydroxymethyltransferase putative expressed
Os02g0671800	5.46	2.74	4.87	16.16	24.16	39.56	4.35667	26.6267	2.61158	2.47748e-13	8.58464e-12	Up	phosphatidylinositol transfer putative expressed
MSTRG.22720	0.16	0.4	0.43	2	2.09	1.96	0.33	2.01667	2.61143	2.48291e-07	3.06507e-06	Up	galactose mutarotase-like putative expressed
MSTRG.24233	0.33	0.28	0.43	1.92	1.99	2.44	0.346667	2.11667	2.61017	1.15294e-11	3.15902e-10	Up	cytidylyltransferase domain containing protein expressed
Os08g0368000	1.88	1.59	1.57	9.44	11.02	10.31	1.68	10.2567	2.61003	1.03165e-36	2.28884e-34	Up	--
Os09g0521300	0.98	1.47	0.88	7.43	8.64	4.25	1.11	6.77333	2.60931	3.4808e-11	8.81876e-10	Up	expressed protein
Os01g0893400	5.23	5.68	5.6	21.66	40.53	38.45	5.50333	33.5467	2.60779	2.44772e-21	1.97974e-19	Up	RNA recognition motif containing protein putative expressed
MSTRG.31462	0.11	0.12	0.13	0.61	1.27	0.31	0.12	0.73	2.60486	0.000473073	0.00247401	Up	dof zinc finger domain containing protein putative expressed
MSTRG.12368	0.1	0.07	0.11	0.4	0.46	0.84	0.0933333	0.566667	2.60204	0.000750708	0.00368638	Up	expressed protein
Os07g0523400	0.21	0.19	0.44	0.24	0.41	4.45	0.28	1.7	2.60204	0.00350128	0.0136546	Up	--
Os05g0166600	0.05	0.35	0.08	0.18	0.34	2.39	0.16	0.97	2.59991	0.010147	0.0332216	Up	retrotransposon protein putative Ty1-copia subclass expressed
Os11g0104240	0.22	0.33	0.17	1.58	1.73	1.05	0.24	1.45333	2.59826	7.53907e-06	6.44178e-05	Up	serine Fthreonine-protein kinase putative expressed
MSTRG.28732	0.26	1.43	0.71	3.31	7.12	4.07	0.8	4.83333	2.59495	0.00014265	0.000861021	Up	NAD dependent epimerase Fdehydratase family protein putative expressed
Os08g0167400	0.1	0.17	0.25	0.57	0.77	1.79	0.173333	1.04333	2.58958	3.75453e-05	0.000267198	Up	retrotransposon protein putative unclassified expressed
Os09g0483500	0.9	1.11	1.05	4.12	5.81	8.44	1.02	6.12333	2.58575	3.4252e-11	8.68479e-10	Up	SCP-like extracellular protein expressed
MSTRG.25949	0.32	0.27	0.11	0.36	1.05	2.79	0.233333	1.4	2.58496	0.00379419	0.014615	Up	Sec1 family transport protein putative expressed
MSTRG.26200	0.22	0	0.12	0.77	0.26	1.01	0.113333	0.68	2.58496	0.00678556	0.0237912	Up	--
Os01g0692000	2.12	0.82	0.59	7.17	7.39	6.61	1.17667	7.05667	2.58428	3.61492e-08	5.27349e-07	Up	remorin C-terminal domain containing protein putative expressed
Os01g0727700	6.2	8.11	7.03	36.22	37.56	53.86	7.11333	42.5467	2.58045	4.99429e-21	3.90116e-19	Up	--
Os01g0960600	1.01	1.55	1.35	6.82	7.73	8.83	1.30333	7.79333	2.58003	1.86255e-21	1.52186e-19	Up	expressed protein
Os07g0646400	0.09	0.06	0.21	0.77	0.59	0.79	0.12	0.716667	2.57827	4.92152e-06	4.41541e-05	Up	glutathione S-transferase putative expressed
MSTRG.23237	0.09	0.25	0.02	0.7	0.64	0.81	0.12	0.716667	2.57827	0.00105173	0.00491957	Up	transducin family protein putative expressed
Os04g0344100	0.12	0.09	0.09	0.15	0.75	0.89	0.1	0.596667	2.57693	0.000648771	0.00325333	Up	endoglucanase putative expressed
Os03g0837000	0.2	0.09	0	0.43	0.88	0.42	0.0966667	0.576667	2.57665	0.0103668	0.0338276	Up	transporter putative expressed
Os04g0121300	0.13	0	0.13	0.54	0.29	0.72	0.0866667	0.516667	2.57568	0.0033901	0.013281	Up	harpin-induced protein 1 domain containing protein expressed
Os02g0214900	1.75	1.84	2.23	11.32	11.92	11.33	1.94	11.5233	2.57043	7.58489e-38	1.75596e-35	Up	receptor-like protein kinase 2 precursor putative expressed
Os03g0439650	0.18	0.13	0.12	0.8	1.31	0.44	0.143333	0.85	2.56809	0.00106922	0.00499041	Up	tetraspanin family protein putative expressed
MSTRG.5864	0.56	0.13	0.41	1.53	2.46	2.52	0.366667	2.17	2.56515	3.45634e-07	4.12181e-06	Up	photosystem II reaction center W protein chloroplast precursor putative expressed
Os01g0158500	6.38	6.6	9.45	34.44	37.33	60.85	7.47667	44.2067	2.5638	6.58725e-22	5.61199e-20	Up	harpin-induced protein 1 domain containing protein expressed
Os07g0613000	6.07	7.56	8.29	32.06	46.46	50.87	7.30667	43.13	2.56141	9.64805e-25	1.00403e-22	Up	expressed protein
MSTRG.11862	8.45	13.28	8.71	39.16	59.65	80.13	10.1467	59.6467	2.55544	2.04634e-14	8.23402e-13	Up	--
Os06g0249350	7.34	7.25	5.63	33.26	34.22	51.34	6.74	39.6067	2.55492	2.51623e-20	1.84801e-18	Up	anthocyanidin 3-O-glucosyltransferase putative expressed
Os03g0283100	59.77	66.69	45.03	316	355.66	334.22	57.1633	335.293	2.55226	5.91109e-28	8.31927e-26	Up	cytochrome P450 putative expressed
Os04g0691900	0.04	0.05	0.05	0.13	0.11	0.58	0.0466667	0.273333	2.5502	0.00163918	0.00716786	Up	--
Os01g0117266	0.06	0.12	0.38	0.47	1.21	1.6	0.186667	1.09333	2.5502	0.0116599	0.0372661	Up	--
MSTRG.5263	0.11	0.18	0.22	0.45	1.59	0.94	0.17	0.993333	2.54674	7.51062e-05	0.000491753	Up	OsFBK15 - F-box domain and kelch repeat containing protein expressed
Os02g0584800	17.14	19.49	14.22	104.81	100.42	91.4	16.95	98.8767	2.54434	1.25949e-30	2.08488e-28	Up	transportin-2 putative expressed
Os03g0852800	3.28	2.49	2.45	13.85	14.23	19.87	2.74	15.9833	2.54432	2.02535e-22	1.77763e-20	Up	aspartic proteinase nepenthesin precursor putative expressed
Os08g0137900	10.37	9.73	9.82	39.8	45.06	89.57	9.97333	58.1433	2.54347	2.90877e-15	1.30886e-13	Up	tyrosine protein kinase domain containing protein putative expressed
Os11g0212900	0	0.06	0.17	0.46	0.17	0.71	0.0766667	0.446667	2.54253	0.00944315	0.0313216	Up	--
Os02g0585100	9.63	19.26	10.41	71.82	72.11	84.93	13.1	76.2867	2.54186	1.47756e-15	6.88119e-14	Up	CAMK_CAMK_like.3 - CAMK includes calcium Fcalmodulin depedent protein kinases expressed
Os01g0842600	0.78	0.63	1.08	5.56	4.71	4.19	0.83	4.82	2.53785	2.27207e-22	1.98871e-20	Up	OsFBX77 - F-box domain containing protein expressed
Os12g0257000	30.51	33.62	31.39	174.33	195.97	184.29	31.84	184.863	2.53755	2.89161e-53	1.30114e-50	Up	SCP-like extracellular protein expressed
Os04g0607600	1.1	0.67	0.96	3.88	2.87	9.09	0.91	5.28	2.5366	1.91379e-08	2.94659e-07	Up	50S ribosomal protein L21 chloroplast precursor putative expressed
MSTRG.14630	0.18	0.15	0.38	0.76	0.94	2.41	0.236667	1.37	2.53325	3.22571e-05	0.00023395	Up	hypothetical protein
Os01g0876200	0.32	0.2	0.47	1	1.79	2.94	0.33	1.91	2.53303	9.62642e-08	1.28465e-06	Up	dirigent putative expressed
MSTRG.9118	0.08	0.15	0.09	0.8	0.61	0.44	0.106667	0.616667	2.53138	1.82004e-05	0.000140349	Up	SHI putative expressed
Os03g0730200	0.13	0.36	0.42	1.23	2.19	1.84	0.303333	1.75333	2.53112	0.000491085	0.00255649	Up	GATA zinc finger domain containing protein expressed
Os11g0127600	2.88	5.01	4.31	21.79	24.22	24.39	4.06667	23.4667	2.52869	1.02384e-23	9.97248e-22	Up	kinesin motor protein-related putative expressed
Os05g0531000	2.49	2.42	1.67	11.3	11.93	14.65	2.19333	12.6267	2.52528	1.0147e-16	5.3583e-15	Up	ATPase putative expressed
MSTRG.16906	0.26	0.49	0.37	2.43	2.16	1.85	0.373333	2.14667	2.52356	3.95903e-07	4.65012e-06	Up	expressed protein
Os11g0679700	2.97	4.41	4.86	8.3	26.64	35.37	4.08	23.4367	2.52213	1.44167e-08	2.27449e-07	Up	expressed protein
Os05g0147800	0.44	0.49	0.48	2.63	2.95	2.51	0.47	2.69667	2.52044	7.933e-14	2.9436e-12	Up	expressed protein
Os01g0930400	0.29	0.49	0.58	1.16	2.17	4.47	0.453333	2.6	2.51987	5.73467e-07	6.48477e-06	Up	beta-expansin precursor putative expressed
Os01g0601625	0.5	0.54	0.88	3.93	3.72	3.36	0.64	3.67	2.51964	1.83086e-21	1.4998e-19	Up	periplasmic beta-glucosidase precursor putative expressed
Os11g0683800	0.28	0.22	0.2	0.23	1.24	2.54	0.233333	1.33667	2.51818	0.000796751	0.00387378	Up	expressed protein
Os03g0712800	1.87	2.45	2.22	15.47	12.61	9.38	2.18	12.4867	2.51799	3.59026e-20	2.60094e-18	Up	expressed protein
Os11g0133001	1.8	1.93	2.51	6.57	7.77	21.37	2.08	11.9033	2.51671	1.87664e-09	3.52469e-08	Up	PREDICTED: probable receptor-like protein kinase At5g15080 [Oryza sativa Japonica Group]
MSTRG.19515	0.19	0.8	1.6	0.99	0.87	12.95	0.863333	4.93667	2.51555	0.00846123	0.028555	Up	expressed protein
Os01g0628000	2.05	1.72	1.3	7.44	7.83	13.67	1.69	9.64667	2.51301	1.47972e-11	3.98601e-10	Up	--
Os03g0588100	0.22	0.05	0.14	0.8	0.79	0.75	0.136667	0.78	2.51281	3.64598e-05	0.000260411	Up	SCP-like extracellular protein expressed
Os02g0215300	0.04	0.06	0.07	0.21	0.35	0.41	0.0566667	0.323333	2.51245	0.00643917	0.0228297	Up	CSLD1 - cellulose synthase-like family D expressed
Os02g0744666	0.28	0.09	0.06	1.24	0.86	0.35	0.143333	0.816667	2.51037	0.0110606	0.0356788	Up	lipoxygenase protein putative expressed
Os08g0484200	0.64	0.72	0.49	4.92	3.64	1.98	0.616667	3.51333	2.51028	5.55817e-09	9.47558e-08	Up	EF hand family protein putative expressed
Os01g0212700	0.06	0.48	0.04	1.35	0.96	0.98	0.193333	1.09667	2.50396	0.00614935	0.0219557	Up	--
Os01g0939300	1.24	1.26	0.78	6.03	7.12	5.44	1.09333	6.19667	2.50276	8.69715e-17	4.64643e-15	Up	expressed protein
Os08g0201100	4.63	10.96	6.4	51.78	60.3	12.28	7.33	41.4533	2.4996	1.88039e-06	1.8709e-05	Up	expressed protein
Os06g0228950	0.08	0	0.44	0.88	0.85	1.21	0.173333	0.98	2.49923	0.0148917	0.0454749	Up	carrier putative expressed
Os12g0127400	0.54	0.29	0.54	1.77	2.78	3.19	0.456667	2.58	2.49816	6.39488e-09	1.07642e-07	Up	--
Os11g0641500	7.41	8.62	9.72	37.98	41.36	65.96	8.58333	48.4333	2.49639	6.7006e-23	6.18701e-21	Up	Similar to Grain length and weight protein. (Os03t0407400-00)
Os07g0141100	0.83	1.84	0.72	6.59	6.51	6	1.13	6.36667	2.49422	1.0773e-09	2.1167e-08	Up	--
Os01g0918400	0.49	0.19	0.3	2.96	2.08	0.48	0.326667	1.84	2.49381	0.000664119	0.00331779	Up	--
Os07g0151800	9.93	12.42	8.75	59.45	72.99	42.72	10.3667	58.3867	2.49369	3.74759e-18	2.26757e-16	Up	AP2 domain containing protein expressed
Os05g0580500	1.33	1.21	1.47	6.5	9.2	6.86	1.33667	7.52	2.49209	6.32573e-26	7.16647e-24	Up	GDSL-like lipase Facylhydrolase putative expressed
Os01g0138800	13.95	14.09	13.13	43.31	71.29	116.85	13.7233	77.15	2.49104	1.06528e-13	3.88512e-12	Up	expressed protein
MSTRG.5954	0.3	0	0.2	1	0.85	0.96	0.166667	0.936667	2.49057	0.00973065	0.0320588	Up	endoglucanase putative expressed
Os01g0558700	5.41	8.14	6.11	35.84	38.88	35.76	6.55333	36.8267	2.49045	1.71965e-24	1.77798e-22	Up	dirigent putative expressed
MSTRG.33156	0.11	0.13	0.09	0.64	0.57	0.64	0.11	0.616667	2.48699	0.000107353	0.000672493	Up	extra-large G-protein-related putative expressed
Os09g0243200	0.99	1.26	0.66	6.6	7.28	2.42	0.97	5.43333	2.48578	2.13917e-06	2.10219e-05	Up	MSP domain containing protein putative expressed
Os11g0604500	0.47	0.74	0.41	3.53	3.77	1.77	0.54	3.02333	2.48511	9.12238e-07	9.79307e-06	Up	--
Os01g0754800	5.72	3.82	3.5	15.27	44.03	13.7	4.34667	24.3333	2.48495	7.64789e-08	1.04194e-06	Up	kinesin motor domain containing protein putative expressed
MSTRG.1941	0.25	0.52	0.57	1.56	1.54	4.4	0.446667	2.5	2.48466	5.25543e-07	6.00503e-06	Up	CXE carboxylesterase putative expressed
Os03g0362500	0.13	0.17	0.24	0.93	0.89	1.2	0.18	1.00667	2.48352	1.56434e-07	2.01117e-06	Up	--
Os10g0345100	9.77	12.54	12.3	70.84	60.63	62.01	11.5367	64.4933	2.48292	1.3091e-41	3.57463e-39	Up	classical arabinogalactan protein 26 precursor putative expressed
Os01g0839100	6.06	5.81	7.37	26.84	36.94	43.34	6.41333	35.7067	2.47705	4.87834e-25	5.22997e-23	Up	cytochrome P450 71A1 putative expressed
Os04g0411300	0.1	0	0.08	0.25	0.41	0.34	0.06	0.333333	2.47393	0.00567821	0.0205164	Up	expressed protein
Os01g0498300	1.45	2.23	2.07	9.21	9.71	13.01	1.91667	10.6433	2.47328	1.19583e-20	9.05318e-19	Up	B3 DNA binding domain containing protein expressed
Os08g0563400	1.87	2.04	2.71	10.13	12.47	14.13	2.20667	12.2433	2.47206	1.72733e-18	1.09061e-16	Up	transposon protein putative unclassified expressed
Os06g0600700	2.71	2.77	3.49	15.02	16.66	18.08	2.99	16.5867	2.47181	1.41647e-41	3.80282e-39	Up	UDP-glucoronosyl and UDP-glucosyl transferase domain containing protein expressed
Os03g0800400	0.87	1	0.47	3.24	4.93	4.8	0.78	4.32333	2.4706	1.50983e-10	3.46275e-09	Up	transposon protein putative unclassified expressed
Os09g0547800	0.77	0.73	0.86	4.45	4.22	4.4	0.786667	4.35667	2.4694	1.59381e-23	1.52452e-21	Up	caleosin related protein putative expressed
Os02g0594800	2.33	2.42	2.59	15.21	14.91	10.47	2.44667	13.53	2.46727	2.381e-26	2.81734e-24	Up	uncharacterized Cys-rich domain containing protein putative expressed
Os01g0158400	1.65	2.13	1.45	12.5	9.35	7.04	1.74333	9.63	2.46569	4.25053e-13	1.43094e-11	Up	IQ calmodulin-binding motif family protein expressed
Os02g0539200	1.39	1.91	1.92	9.74	10.04	9.02	1.74	9.6	2.46395	2.67516e-27	3.48841e-25	Up	expressed protein
MSTRG.17427	0.29	0.75	0.24	2.05	2.25	2.76	0.426667	2.35333	2.46352	1.41586e-06	1.44287e-05	Up	wound-induced protein WI12 putative expressed
Os08g0412700	3.77	7.94	6.4	28.4	28.35	42.98	6.03667	33.2433	2.46124	1.04438e-14	4.39025e-13	Up	transporter family protein putative expressed
Os02g0253700	1.75	3.78	0.8	10.57	11.03	13.23	2.11	11.61	2.46005	1.12381e-06	1.17563e-05	Up	cytochrome c putative expressed
Os10g0400500	0.15	0	0.05	0.39	0.29	0.42	0.0666667	0.366667	2.45943	0.0155499	0.0470979	Up	expressed protein
Os11g0465200	1.06	1.03	0.93	5.58	7.01	3.97	1.00667	5.52	2.45508	4.70144e-15	2.06321e-13	Up	--
Os11g0608300	0.31	0.29	0.79	1.25	1.49	4.83	0.463333	2.52333	2.44521	4.0211e-05	0.000283777	Up	expressed protein
Os01g0155800	17.53	32.24	14.26	107.18	106.05	135.13	21.3433	116.12	2.44376	1.11912e-12	3.53647e-11	Up	retrotransposon protein putative Ty1-copia subclass expressed
Os03g0702100	4.2	3.87	4.58	17.93	25.18	25.61	4.21667	22.9067	2.44159	1.11885e-29	1.76084e-27	Up	AP005392-AK108636 - NBS FLRR genes that are S-rich divergent TIR divergent NBS expressed
Os07g0684000	3.1	3.44	1.39	7.56	10.9	24.59	2.64333	14.35	2.44062	1.06474e-06	1.12007e-05	Up	expressed protein
Os05g0464200	2.63	4.71	2.38	20.63	22.01	10.08	3.24	17.5733	2.43932	2.06789e-07	2.59384e-06	Up	transposon protein putative unclassified expressed
Os04g0614300	0.44	0.81	0.88	1.9	2.68	6.94	0.71	3.84	2.43522	1.17986e-05	9.51942e-05	Up	FHA domain containing protein putative expressed
Os05g0326625	0.08	0.08	0.16	0.53	0.35	0.85	0.106667	0.576667	2.43463	0.0102264	0.0334408	Up	tyrosine protein kinase domain containing protein putative expressed
Os08g0209000	0.96	0.75	0.83	4.13	6.93	2.67	0.846667	4.57667	2.43443	8.69852e-08	1.1706e-06	Up	GRF-interacting factor 1 putative expressed
MSTRG.21184	0.34	0.09	0.14	1.01	1.23	0.84	0.19	1.02667	2.4339	2.40294e-05	0.00018004	Up	phytochrome A-associated F-box protein putative expressed
MSTRG.33288	0.27	0.08	0.1	0.7	0.68	1.05	0.15	0.81	2.43296	0.000192457	0.00112633	Up	--
Os04g0649000	0.3	0.17	0.16	0.64	1.08	1.68	0.21	1.13333	2.43211	3.10204e-05	0.000226265	Up	ribosomal L18p FL5e family protein putative expressed
Os01g0881900	29.83	24.31	23.11	125.36	155.53	135.78	25.75	138.89	2.4313	5.97988e-33	1.13565e-30	Up	expressed protein
Os05g0580000	5.56	3.43	9.32	11.93	13.72	72.67	6.10333	32.7733	2.42485	0.00429996	0.0162596	Up	--
Os03g0645900	2.7	1.83	1.4	8.35	11.69	11.7	1.97667	10.58	2.4202	2.51292e-14	1.00228e-12	Up	plant protein of unknown function domain containing protein expressed
Os03g0421700	0.53	0.25	0.41	2.01	1.95	2.4	0.396667	2.12	2.41807	0.000551312	0.00281678	Up	ribulose bisphosphate carboxylase small chain chloroplast precursor putative expressed
Os10g0509600	9.7	11.56	10.96	62.25	48.94	60.46	10.74	57.2167	2.41344	2.03244e-27	2.69429e-25	Up	LRP1 putative expressed
Os03g0159900	11.32	12.74	10.19	67.76	62.53	51.75	11.4167	60.68	2.41008	7.65755e-28	1.06831e-25	Up	aspartic proteinase putative expressed
MSTRG.34257	0.61	0.71	0.66	2.38	3.5	4.64	0.66	3.50667	2.40956	4.38906e-09	7.62903e-08	Up	aminotransferase classes I and II domain containing protein expressed
Os12g0191500	2.14	1.61	2.3	9.64	10.3	12.18	2.01667	10.7067	2.40846	4.97e-24	4.99313e-22	Up	Histidine protein methyltransferase 1-like protein [Dichanthelium oligosanthes]
Os01g0855700	0.99	0.61	0.26	2.25	1.72	5.9	0.62	3.29	2.40775	4.16815e-05	0.00029254	Up	--
MSTRG.22172	0.4	0.2	0.12	1.23	1.15	1.44	0.24	1.27333	2.4075	4.719e-05	0.000326255	Up	glutathione S-transferase GST 26 putative expressed
Os10g0378450	0.14	0.1	0.09	0.86	0.78	0.11	0.11	0.583333	2.40682	0.0158588	0.0479123	Up	enoyl-CoA hydratase Fisomerase family protein putative expressed
MSTRG.27682	0.16	0.53	0.11	0.74	0.92	2.58	0.266667	1.41333	2.40599	0.00341048	0.0133445	Up	YCF37 putative expressed
MSTRG.29202	0.34	0.87	1.04	3.94	4.39	3.59	0.75	3.97333	2.40539	1.2007e-08	1.92467e-07	Up	domain of unknown function DUF250 domain containing protein expressed
Os05g0588850	0.11	0.09	0.17	0.75	0.71	0.5	0.123333	0.653333	2.40526	0.000265338	0.00149533	Up	polyprenyl synthetase putative expressed
Os06g0136600	13.14	16.43	12.6	72.03	79.3	71.83	14.0567	74.3867	2.40379	7.19445e-31	1.20973e-28	Up	kinesin motor protein-related putative expressed
Os05g0261700	2.48	2.99	7.79	10.42	9.64	50.06	4.42	23.3733	2.40275	0.00429888	0.0162591	Up	protein kinase domain containing protein expressed
Os01g0942300	5.66	4.19	2.97	23.57	24.07	20.07	4.27333	22.57	2.40097	3.46684e-14	1.35734e-12	Up	exo70 exocyst complex subunit putative expressed
Os01g0660900	0.55	0.33	0.12	1.95	1.46	1.87	0.333333	1.76	2.40054	7.93747e-05	0.00051663	Up	--
Os01g0863300	5.64	6.42	4.89	22.84	30.4	36.09	5.65	29.7767	2.39786	8.23458e-20	5.85921e-18	Up	carrier putative expressed
Os02g0282500	0.08	0.25	0.32	1.32	1.54	0.56	0.216667	1.14	2.39548	2.94605e-05	0.000216219	Up	transposon protein putative unclassified expressed
Os11g0454300	0.98	0.47	0.71	3.39	1.1	6.87	0.72	3.78667	2.39486	0.000264779	0.0014927	Up	O-methyltransferase putative expressed
Os08g0241300	1.11	1.09	0.7	4.83	5.69	4.72	0.966667	5.08	2.39374	8.21321e-12	2.29567e-10	Up	ribosomal protein L27 putative expressed
Os05g0123000	0.59	1.07	1.32	5.1	5.52	5.04	0.993333	5.22	2.3937	4.18999e-08	6.03525e-07	Up	--
Os01g0844300	0.55	0	0.16	0.5	1.17	2.06	0.236667	1.24333	2.39328	0.0164688	0.0493299	Up	carbonyl reductase 3 putative expressed
Os07g0194100	2.38	4.49	2.61	16	20.51	13.27	3.16	16.5933	2.39261	4.32967e-13	1.45298e-11	Up	GDSL-like lipase Facylhydrolase putative expressed
Os08g0412800	0.91	1.6	1.77	6.6	8.91	6.96	1.42667	7.49	2.39232	1.493e-14	6.13878e-13	Up	protein kinase family protein putative expressed
Os05g0421600	0.34	0.72	0.34	2.63	2.96	1.76	0.466667	2.45	2.39232	4.95249e-06	4.43697e-05	Up	mitochondrial carrier protein putative expressed
Os11g0665600	15.57	25.47	19.61	120.77	102.95	94.09	20.2167	105.937	2.38958	1.79442e-21	1.47373e-19	Up	proline-rich protein putative expressed
MSTRG.2976	0.1	0	0.45	0.75	1.1	1.03	0.183333	0.96	2.38857	0.01488	0.045448	Up	expressed protein
Os02g0271000	0.18	0.22	0.2	0.8	0.72	1.61	0.2	1.04333	2.38313	8.69388e-07	9.39304e-06	Up	pectinesterase putative expressed
Os12g0248600	1.49	3.76	1.97	13.73	14.27	9.66	2.40667	12.5533	2.38296	7.67659e-09	1.27311e-07	Up	expressed protein
Os11g0593100	0.25	0.13	0.35	1.2	1.17	1.43	0.243333	1.26667	2.38003	7.81626e-07	8.56357e-06	Up	expressed protein
Os03g0397600	0.24	0.29	0.3	1.37	2.28	0.67	0.276667	1.44	2.37985	2.07775e-05	0.000158124	Up	--
Os03g0201000	0.2	0.34	0.25	1.58	1.41	1.11	0.263333	1.36667	2.3757	6.63895e-07	7.38e-06	Up	protein kinase putative expressed
Os05g0592000	0.84	1.04	0.68	3.96	5.37	3.94	0.853333	4.42333	2.37395	3.59814e-11	9.08004e-10	Up	cysteine synthase chloroplast Fchromoplast precursor putative expressed
Os10g0161400	0.32	0.5	0.77	2.78	1.69	3.77	0.53	2.74667	2.37362	1.01187e-09	2.00168e-08	Up	expressed protein
Os12g0153200	2.83	3.09	1.37	12.16	14.26	11.31	2.43	12.5767	2.37172	1.1029e-10	2.57006e-09	Up	expressed protein
Os05g0574600	4.41	3.95	3.06	11.4	20.37	27.29	3.80667	19.6867	2.37062	3.97028e-12	1.15627e-10	Up	expressed protein
Os03g0661600	81.67	145.39	115.27	368.68	512.4	889.1	114.11	590.06	2.37044	1.13381e-11	3.11194e-10	Up	transporter family protein putative expressed
Os06g0134466	2.07	1.36	1.24	8.26	9.34	6.54	1.55667	8.04667	2.36993	3.64404e-14	1.42497e-12	Up	O-methyltransferase putative expressed
Os03g0643250	1.01	0.96	0.92	3.41	2.97	8.55	0.963333	4.97667	2.36907	5.82126e-07	6.56735e-06	Up	nodulin MtN3 family protein putative expressed
Os01g0793800	7.79	7.33	8.25	27.4	35.94	57.12	7.79	40.1533	2.36582	1.86803e-15	8.56237e-14	Up	expressed protein
Os03g0721900	11.99	18.57	10.58	81.02	77.29	53.72	13.7133	70.6767	2.36565	4.45697e-14	1.72596e-12	Up	cyclin putative expressed
MSTRG.23236	0.39	0	0.26	0.44	1.18	1.73	0.216667	1.11667	2.36565	0.0115323	0.0369504	Up	expressed protein
Os02g0206700	1.51	1.44	1.51	6.48	10.16	6.31	1.48667	7.65	2.36338	9.4095e-17	5.00191e-15	Up	amino acid permease family protein putative expressed
Os08g0413000	0.14	0.07	0.09	0.35	0.84	0.35	0.1	0.513333	2.3599	0.000180026	0.00106181	Up	haemolysin-III putative expressed
Os11g0208000	0.03	0.05	0.07	0.21	0.47	0.09	0.05	0.256667	2.3599	0.0132193	0.0413056	Up	--
Os10g0527400	24.93	37.3	22.48	129.51	150.15	154.4	28.2367	144.687	2.35729	9.07311e-19	5.84411e-17	Up	retrotransposon protein putative unclassified expressed
MSTRG.29630	0.18	0.35	0.24	1.58	1.34	1.01	0.256667	1.31	2.3516	0.00151216	0.00668286	Up	AP2 domain containing protein expressed
Os03g0344232	0.83	1.48	0.82	5.73	6.06	4.16	1.04333	5.31667	2.34932	9.53952e-09	1.54548e-07	Up	B3 DNA binding domain containing protein expressed
Os03g0841600	5.53	8.53	7.69	34.6	39.6	36.62	7.25	36.94	2.34913	1.27159e-25	1.41058e-23	Up	--
Os11g0592000	133.17	255.57	141.8	590.93	848.69	1262.14	176.847	900.587	2.34837	7.40153e-11	1.77926e-09	Up	--
Os11g0671950	2.99	4.09	4.56	14.56	18.31	26.32	3.88	19.73	2.34626	2.66563e-14	1.06054e-12	Up	membrane associated DUF588 domain containing protein putative expressed
Os04g0116200	2.85	3.19	2.25	13.82	18.92	9.38	2.76333	14.04	2.34506	2.47356e-12	7.4202e-11	Up	GDSL-like lipase Facylhydrolase putative expressed
Os07g0459500	0.17	0.33	0.32	1.13	1.45	1.58	0.273333	1.38667	2.34289	8.88302e-07	9.5715e-06	Up	expressed protein
Os10g0542550	0.05	0.05	0.11	0.32	0.27	0.47	0.07	0.353333	2.3356	0.0115737	0.0370646	Up	expressed protein
Os06g0670300	2.31	5.04	3.55	14.17	14.75	26.07	3.63333	18.33	2.33484	1.54186e-10	3.53366e-09	Up	RALFL9 - Rapid ALkalinization Factor RALF family protein precursor expressed
Os11g0210300	26.41	34.3	23.16	142.99	165.79	114.14	27.9567	140.973	2.33416	1.69157e-19	1.17483e-17	Up	O-sialoglycoprotein endopeptidase putative expressed
Os06g0727300	0.22	0.16	0.3	1.25	1.27	0.9	0.226667	1.14	2.33039	1.02199e-06	1.08222e-05	Up	expressed protein
MSTRG.27177	0.23	0.22	0.23	1.09	0.6	1.72	0.226667	1.13667	2.32617	4.23862e-05	0.000296573	Up	--
Os03g0660400	0.16	0.45	0.32	0.64	1.8	2.22	0.31	1.55333	2.32503	0.00790442	0.0270491	Up	Protein of unknown function DUF594 domain containing protein. (Os11t0638700-00)
Os03g0277700	10.5	17.39	8.3	58.92	61.23	61.14	12.0633	60.43	2.32464	1.6613e-13	5.91039e-12	Up	ZOS8-07 - C2H2 zinc finger protein expressed
Os11g0146100	0.65	0.56	0.48	2.76	3	2.7	0.563333	2.82	2.32363	1.65454e-13	5.89289e-12	Up	UDP-glucoronosyl and UDP-glucosyl transferase domain containing protein expressed
Os09g0329200	0.7	0.04	0.07	0.81	1.73	1.51	0.27	1.35	2.32193	0.00964377	0.031838	Up	glycosyl hydrolase putative expressed
Os02g0570500	0	0.48	0.27	0.53	1.74	1.47	0.25	1.24667	2.31808	0.0131159	0.0410369	Up	--
Os01g0795600	1.45	3.33	2.05	11.78	13	9.15	2.27667	11.31	2.3126	1.96976e-09	3.68011e-08	Up	peroxidase precursor putative expressed
Os05g0181200	0.07	0.26	0.22	0.81	0.68	1.24	0.183333	0.91	2.3114	0.000117568	0.000727919	Up	expressed protein
Os03g0757500	0.79	1.22	0.71	5.29	3.89	4.32	0.906667	4.5	2.31128	4.66153e-12	1.34653e-10	Up	--
Os12g0617400	2.79	2.66	2.54	8.02	14.11	17.52	2.66333	13.2167	2.31105	3.7072e-13	1.25464e-11	Up	thioredoxin putative expressed
Os06g0147200	7.4	7.54	7.35	22.65	36.96	50.97	7.43	36.86	2.31062	2.30749e-13	8.02174e-12	Up	syntaxin 6 N-terminal domain containing protein expressed
MSTRG.3960	0.53	0.41	0.41	1.65	2.42	2.62	0.45	2.23	2.30905	3.73526e-09	6.56764e-08	Up	O-methyltransferase putative expressed
Os10g0550400	0.06	0.06	0.29	0.7	0.91	0.42	0.136667	0.676667	2.30778	0.00311591	0.0123613	Up	inactive receptor kinase At2g26730 precursor putative expressed
Os05g0188100	206.7	207.81	136.88	619.34	567.3	1537.97	183.797	908.203	2.3049	3.93841e-09	6.8907e-08	Up	expressed protein
Os12g0230200	0.05	0.04	0.08	0.1	0.3	0.44	0.0566667	0.28	2.30485	0.00329376	0.0129548	Up	receptor-like protein kinase precursor putative expressed
Os08g0197200	0.08	0.12	0.12	0.62	0.52	0.44	0.106667	0.526667	2.30378	0.000134661	0.00082008	Up	--
Os11g0460500	0.28	0.19	0.44	1.05	1.51	1.93	0.303333	1.49667	2.30278	4.0976e-06	3.7607e-05	Up	PAIR1 putative expressed
Os03g0615300	0.09	0.06	0.15	0.41	0.42	0.65	0.1	0.493333	2.30256	4.18275e-06	3.82316e-05	Up	amino acid permease family protein putative expressed
Os01g0605100	30.63	35.75	30.82	166.01	159.51	153.97	32.4	159.83	2.30247	3.2982e-39	8.10544e-37	Up	--
Os01g0848900	1.82	1.51	1.78	5.56	5.94	13.68	1.70333	8.39333	2.30088	2.93188e-09	5.27705e-08	Up	expressed protein
Os04g0486300	0.57	0.55	0.45	2.56	2.47	2.69	0.523333	2.57333	2.29784	3.93408e-13	1.32861e-11	Up	retrotransposon protein putative unclassified expressed
Os01g0348900	550.43	1120.09	905.07	2660.59	3596.6	6400.22	858.53	4219.14	2.29701	2.92883e-10	6.37399e-09	Up	POEI18 - Pollen Ole e I allergen and extensin family protein precursor expressed
MSTRG.23424	0.36	0.47	0.18	1.77	1.6	1.59	0.336667	1.65333	2.29598	1.59773e-06	1.61359e-05	Up	expressed protein
Os02g0218700	6.38	9.47	6.85	27.64	22.39	61.41	7.56667	37.1467	2.2955	2.02438e-09	3.76455e-08	Up	expressed protein
Os10g0464500	1.76	2.08	1.88	6.52	9.19	12.37	1.90667	9.36	2.29546	2.74483e-14	1.08799e-12	Up	--
Os08g0528000	0.06	0.11	0.16	0.53	0.54	0.55	0.11	0.54	2.29546	2.10678e-05	0.000160065	Up	spotted leaf 11 putative expressed
MSTRG.13537	0.42	0.62	0.87	2.96	4.12	2.29	0.636667	3.12333	2.29448	9.07134e-07	9.74811e-06	Up	expressed protein
Os01g0826000	2.44	4.79	5.29	20.07	20.23	21.07	4.17333	20.4567	2.2933	2.72365e-13	9.37662e-12	Up	Ser FThr protein phosphatase family protein putative expressed
Os01g0138500	3.34	5.25	7.94	18.43	36.17	26.36	5.51	26.9867	2.29212	2.51002e-11	6.51424e-10	Up	PREDICTED: cytochrome P450 94B3 [Oryza sativa Japonica Group]
Os04g0614650	7.89	8.42	20.69	36.43	47.97	96.19	12.3333	60.1967	2.28712	2.28102e-08	3.45538e-07	Up	expressed protein
Os03g0277300	2.57	1.94	1.54	8.42	10.17	10.89	2.01667	9.82667	2.28473	9.95816e-17	5.28477e-15	Up	NBS-LRR disease resistance protein putative expressed
MSTRG.6443	4.84	8.9	2.87	18.14	23.95	38.74	5.53667	26.9433	2.28284	4.5604e-07	5.27119e-06	Up	--
Os07g0507500	0.12	0.21	0.09	0.6	0.75	0.69	0.14	0.68	2.28011	3.37417e-05	0.000243391	Up	transposon protein putative unclassified expressed
Os06g0667200	0.32	0.35	0.66	2.13	2.38	1.95	0.443333	2.15333	2.28011	3.61878e-08	5.27671e-07	Up	MYB family transcription factor putative expressed
Os02g0511400	2.57	2.55	2.48	5.55	5.31	26.03	2.53333	12.2967	2.27916	3.20746e-05	0.000232785	Up	expressed protein
MSTRG.5376	0.09	0	0.18	0.48	0.36	0.47	0.09	0.436667	2.27854	0.0141749	0.0436912	Up	UDP-glucoronosyl and UDP-glucosyl transferase domain containing protein expressed
Os01g0888900	8.99	10.64	4.74	32.87	32.3	53.05	8.12333	39.4067	2.2783	1.06908e-09	2.10185e-08	Up	expressed protein
Os03g0310701	0.59	0.06	0.22	1.5	1.62	1.1	0.29	1.40667	2.27816	0.0078933	0.0270168	Up	fructose-bisphospate aldolase isozyme putative expressed
Os10g0118800	1.11	1.53	1.82	6.04	7.93	7.66	1.48667	7.21	2.27792	1.18994e-11	3.25202e-10	Up	BAP2 putative expressed
Os03g0302800	1.5	1.89	2.67	12.36	10.78	6.18	2.02	9.77333	2.2745	3.08812e-11	7.88642e-10	Up	expressed protein
Os01g0139700	4.58	6.06	3.17	18.69	20.42	27.53	4.60333	22.2133	2.27068	1.9454e-11	5.13225e-10	Up	expressed protein
Os11g0633600	0.7	1.54	1.14	5.4	5.99	4.89	1.12667	5.42667	2.26801	2.58622e-08	3.87182e-07	Up	--
Os02g0802575	0.14	0.23	0.05	0.62	0.78	0.62	0.14	0.673333	2.26589	0.0002801	0.00156746	Up	Similar to Cinnamyl alcohol dehydrogenase (EC 1.1.1.195).
Os10g0123200	0.48	0.39	0.4	1.98	2.31	1.81	0.423333	2.03333	2.26398	6.48759e-11	1.57856e-09	Up	FAD-binding and arabino-lactone oxidase domains containing protein putative expressed
Os01g0128100	0.08	0.29	0.23	0.9	1.22	0.76	0.2	0.96	2.26303	4.91772e-06	4.41324e-05	Up	GDSL-like lipase Facylhydrolase putative expressed
Os01g0179901	0.48	0.06	0.19	1.08	0.94	1.48	0.243333	1.16667	2.26139	0.00216381	0.00910676	Up	cytochrome P450 putative expressed
Os10g0154500	0.68	0.96	0.85	6.01	3.62	2.29	0.83	3.97333	2.25917	5.4061e-07	6.16176e-06	Up	ZOS4-01 - C2H2 zinc finger protein expressed
MSTRG.33466	1.74	1.89	2.66	9.79	10.16	10.12	2.09667	10.0233	2.25719	5.90613e-28	8.31927e-26	Up	Similar to ribulose-1,5-bisphosphate carboxylase/oxygenase large subunit. (Os01t0791033-00)
Os04g0436900	0.15	0.35	0.27	1.23	1.24	1.21	0.256667	1.22667	2.25678	1.50137e-08	2.35589e-07	Up	Similar to Thioredoxin (TRX).
MSTRG.17556	0.92	0.9	1.13	4.28	5.39	4.38	0.983333	4.68333	2.25178	1.41174e-14	5.81964e-13	Up	aspartic proteinase nepenthesin precursor putative expressed
Os05g0282900	0.83	0.11	0.74	3.15	2.27	2.56	0.56	2.66	2.24793	6.054e-05	0.000405819	Up	kinesin motor domain containing protein putative expressed
Os12g0448900	26.13	23.41	35	99.03	109.25	192.47	28.18	133.583	2.245	8.25467e-16	3.97169e-14	Up	glycosyltransferase putative expressed
Os10g0506100	10.56	15.53	16.13	65.26	64.17	70.69	14.0733	66.7067	2.24487	1.10401e-25	1.22895e-23	Up	--
Os06g0201000	2.49	1.52	2.07	11.82	12.31	4.59	2.02667	9.57333	2.23991	4.46236e-08	6.38154e-07	Up	microtubule associated protein putative expressed
Os01g0187900	5.9	5.53	5.77	21.97	25.96	33.27	5.73333	27.0667	2.23907	2.18644e-24	2.2317e-22	Up	homeobox associated leucine zipper putative expressed
Os12g0136300	0.31	0.19	0.18	0.8	0.95	1.46	0.226667	1.07	2.23897	2.63335e-06	2.53633e-05	Up	beta-galactosidase precursor putative expressed
MSTRG.13103	0.25	0.36	0.13	1.23	1.54	0.72	0.246667	1.16333	2.23763	0.00725967	0.0251662	Up	expressed protein
Os01g0556650	1.37	0.72	1.12	3.08	8.97	3.07	1.07	5.04	2.23581	2.92217e-06	2.78513e-05	Up	HAD superfamily phosphatase putative expressed
Os02g0773732	0.83	0.43	0.28	2.76	2.58	1.89	0.513333	2.41	2.23107	2.98319e-07	3.61012e-06	Up	myb-related protein Hv33 putative expressed
Os01g0947000	129.82	216.12	143.15	705.3	763.5	825.16	163.03	764.653	2.22967	4.53111e-18	2.72105e-16	Up	--
Os12g0576750	10.71	10.62	10.83	38.65	34.21	77.83	10.72	50.23	2.22824	1.27998e-12	4.00124e-11	Up	hydrolase alpha Fbeta fold family domain containing protein expressed
Os03g0810700	1.01	1.16	2.82	4.97	8.07	10.33	1.66333	7.79	2.22755	1.44427e-06	1.47041e-05	Up	cytokinin-O-glucosyltransferase putative expressed
Os05g0465000	2.85	1.55	2.15	9.67	9.76	11.23	2.18333	10.22	2.22679	1.99063e-13	7.00404e-12	Up	ORC1 - Putative origin recognition complex subunit 1 expressed
Os02g0686700	2.92	5.05	5.29	18.91	21.52	21.51	4.42	20.6467	2.22379	2.14215e-16	1.09325e-14	Up	expressed protein
Os06g0618000	0.44	0.43	0.46	2.16	2.2	1.85	0.443333	2.07	2.22317	4.40643e-11	1.0981e-09	Up	protein kinase putative expressed
Os02g0178000	0.09	0.07	0.02	0.16	0.33	0.35	0.06	0.28	2.22239	0.0140942	0.0434718	Up	expressed protein
Os03g0702000	5.17	8.58	5.8	24.83	35.84	30.53	6.51667	30.4	2.22187	3.92023e-15	1.73949e-13	Up	TraB family protein putative expressed
Os05g0588800	5	4.11	4.76	18.94	20.11	25.63	4.62333	21.56	2.22135	4.7459e-28	6.76885e-26	Up	OsSub4 - Putative Subtilisin homologue expressed
MSTRG.11860	0.22	1.25	0.45	2.46	2.62	3.87	0.64	2.98333	2.22078	0.000271257	0.00152492	Up	GDSL-like lipase Facylhydrolase putative expressed
Os04g0398000	2.69	3.57	3.77	12.01	12.6	22.13	3.34333	15.58	2.22034	1.36065e-14	5.63812e-13	Up	expressed protein
Os01g0214500	9.76	19.82	9.27	51.15	57.53	72.32	12.95	60.3333	2.22	4.41546e-10	9.25624e-09	Up	--
Os04g0269800	3.78	3.7	6.43	21.78	20.56	22.46	4.63667	21.6	2.21987	8.076e-23	7.37178e-21	Up	ICE-like protease p20 domain containing protein putative expressed
Os02g0215200	9.82	10.14	11.7	43.59	50.93	52.66	10.5533	49.06	2.21685	1.38455e-41	3.74862e-39	Up	WD domain G-beta repeat domain containing protein expressed
Os11g0425100	0.03	0.08	0.06	0.37	0.25	0.17	0.0566667	0.263333	2.21632	0.00370574	0.0143088	Up	expressed protein
Os02g0320600	0.19	0.18	0.13	0.69	1.04	0.59	0.166667	0.773333	2.21412	0.00651448	0.0230379	Up	NBS-LRR type resistance protein putative expressed
Os02g0668500	25.12	20.98	17.42	86.9	123	84.38	21.1733	98.0933	2.21191	1.10752e-17	6.40996e-16	Up	MBTB9 - Bric-a-Brac Tramtrack Broad Complex BTB domain with Meprin and TRAF Homology MATH domain expressed
Os01g0706600	17.65	17.61	18.88	64.36	78.31	107.98	18.0467	83.55	2.21091	5.7069e-21	4.41462e-19	Up	plastocyanin-like domain containing protein putative expressed
Os03g0735150	0.05	0.02	0.17	0.54	0.27	0.3	0.08	0.37	2.20945	0.00382918	0.0147249	Up	retrotransposon protein putative unclassified expressed
Os03g0233000	11.02	17.64	7.16	36.61	53.51	75.49	11.94	55.2033	2.20895	1.94444e-08	2.99234e-07	Up	monocopper oxidase putative expressed
Os11g0672200	0.47	1.81	2.73	8.32	10.17	4.67	1.67	7.72	2.20875	6.46818e-05	0.000429706	Up	--
MSTRG.6437	0.49	0.82	0.49	1.73	2.46	4.11	0.6	2.76667	2.20511	4.30157e-05	0.000300649	Up	THION3 - Plant thionin family protein precursor expressed
MSTRG.14695	0.37	0.66	0.5	2.08	2.72	2.25	0.51	2.35	2.20409	1.96012e-07	2.46932e-06	Up	WRKY48 expressed
Os08g0189400	20.49	22.97	17.92	79.64	84.23	118.54	20.46	94.1367	2.20195	1.81753e-19	1.25685e-17	Up	expressed protein
MSTRG.29032	0.09	1.23	0.55	1.72	2.07	4.81	0.623333	2.86667	2.2013	0.00577141	0.0208063	Up	peptide transporter PTR3-A putative expressed
MSTRG.28783	0.09	0.25	0.48	1.4	0.93	1.44	0.273333	1.25667	2.20087	0.00065412	0.00327537	Up	B3 DNA binding domain containing protein expressed
Os04g0624900	1.96	3.67	2.54	12.7	15.83	8.97	2.72333	12.5	2.19848	2.01437e-09	3.74811e-08	Up	expressed protein
Os03g0177400	871.39	849.59	883.3	4155.08	4153.44	3627.98	868.093	3978.83	2.19642	2.04418e-48	7.86835e-46	Up	phosphate-induced protein 1 conserved region domain containing protein expressed
Os04g0110100	2.8	1.67	2.67	11.33	14.09	7.28	2.38	10.9	2.19529	3.26547e-11	8.31941e-10	Up	L-allo-threonine aldolase putative expressed
Os04g0373000	0.35	0.24	0.48	1.27	2.95	0.67	0.356667	1.63	2.19222	0.000522639	0.00269485	Up	heat shock protein DnaJ putative expressed
Os08g0414500	4.75	5.21	3.44	27.81	23.91	9.44	4.46667	20.3867	2.19036	4.12442e-07	4.82133e-06	Up	blue-light photoreceptor PHR2 putative expressed
Os07g0683200	23.24	26.03	23.31	69.47	114.34	147.39	24.1933	110.4	2.19006	1.71676e-14	6.9869e-13	Up	ATPase 3 putative expressed
Os01g0578700	1.59	2.81	2.49	9.23	11.95	10.26	2.29667	10.48	2.19003	5.37979e-13	1.77372e-11	Up	--
Os09g0561500	0.92	1.08	1.29	2.12	2.09	10.8	1.09667	5.00333	2.18976	0.000141279	0.000854798	Up	NBS-LRR disease resistance protein putative expressed
Os03g0776900	12.17	16.81	14.22	63.71	65.99	66.86	14.4	65.52	2.18587	2.1686e-26	2.59485e-24	Up	cytochrome P450 putative expressed
Os01g0192550	1.95	1.69	1.87	9.06	9.11	6.84	1.83667	8.33667	2.18238	1.44803e-18	9.23386e-17	Up	--
Os04g0372700	3.76	2.61	2.83	12.1	15.12	14.47	3.06667	13.8967	2.18	6.09365e-15	2.63794e-13	Up	expressed protein
Os07g0668700	3.41	1.78	3.92	7.94	8.43	24.86	3.03667	13.7433	2.17817	1.21093e-06	1.25648e-05	Up	cytochrome P450 51 putative expressed
Os07g0579100	0.7	0.53	0.61	1.48	2.74	4.1	0.613333	2.77333	2.17688	1.77606e-05	0.000137356	Up	amino acid transporter protein putative expressed
Os10g0559833	0.19	0.3	0.52	1.1	1.95	1.51	0.336667	1.52	2.17468	7.16781e-07	7.92927e-06	Up	strictosidine synthase putative expressed
Os05g0324000	0.1	0.09	0.16	0.62	0.62	0.34	0.116667	0.526667	2.1745	0.000547877	0.00280192	Up	retrotransposon protein putative unclassified expressed
Os09g0421300	0.52	0.25	0.11	1.52	1.53	0.92	0.293333	1.32333	2.17356	0.000118762	0.000734457	Up	--
Os08g0445700	3.2	4.01	4.6	10.06	15.88	27.18	3.93667	17.7067	2.16925	3.9802e-10	8.44913e-09	Up	jacalin-like lectin domain containing protein expressed
Os12g0123800	2.63	3.53	3.94	13.41	13.72	18.28	3.36667	15.1367	2.16865	6.73632e-20	4.80384e-18	Up	--
MSTRG.28196	1.38	1.08	1.44	7.81	5.03	4.62	1.3	5.82	2.16251	2.06024e-08	3.15535e-07	Up	DSHCT domain containing protein expressed
Os04g0435500	6.55	7.62	6.62	26.41	35.93	30.71	6.93	31.0167	2.16212	6.63746e-24	6.56512e-22	Up	DEAD-box ATP-dependent RNA helicase 3 putative expressed
Os04g0632200	0.12	0.5	0.23	1.33	1.06	1.41	0.283333	1.26667	2.16046	0.00598188	0.0214464	Up	--
Os03g0259400	0.1	0.47	0.36	1.87	0.92	1.35	0.31	1.38	2.15433	0.000607637	0.00307116	Up	xylanase inhibitor putative expressed
Os11g0605500	33	33.72	39.38	114.48	137.07	220.62	35.3667	157.39	2.15388	1.00564e-16	5.32808e-15	Up	expressed protein
Os06g0152400	2.02	2.52	2.37	8.44	8.98	13.33	2.30333	10.25	2.15383	4.31666e-16	2.13481e-14	Up	--
Os04g0531800	0.31	0.36	0.33	1.24	1.33	1.88	0.333333	1.48333	2.15381	6.93309e-11	1.67802e-09	Up	SWIB FMDM2 domain containing protein expressed
Os01g0571166	3.33	3.39	7.21	10.4	12.6	38.91	4.64333	20.6367	2.15198	7.0804e-06	6.09552e-05	Up	THION6 - Plant thionin family protein precursor expressed
Os08g0495300	0.18	0.09	0.43	0.62	1.07	1.42	0.233333	1.03667	2.15149	0.00134671	0.00607694	Up	DVR putative expressed
Os01g0267300	2.41	3.56	2.49	14.4	14.92	8.25	2.82	12.5233	2.15085	2.88271e-11	7.39733e-10	Up	--
Os04g0617900	23.26	47.52	15.3	186.22	123.04	72.64	28.6933	127.3	2.14944	3.24015e-06	3.05718e-05	Up	--
Os12g0104850	0.51	0.24	0.38	0.96	1.53	2.52	0.376667	1.67	2.14849	0.000223779	0.00128886	Up	CCT motif family protein expressed
Os01g0864500	17.08	20.41	18.86	57.41	71.34	120.91	18.7833	83.22	2.14748	2.99924e-13	1.02811e-11	Up	IQ calmodulin-binding motif family protein putative expressed
Os06g0702200	0.12	0.18	0.17	0.66	0.83	0.59	0.156667	0.693333	2.14585	0.000166135	0.000988396	Up	inositol-1-monophosphatase putative expressed
Os10g0325400	3.4	4.99	6.74	19.51	15.46	31.91	5.04333	22.2933	2.14416	9.64191e-11	2.27503e-09	Up	Zinc finger C3HC4 type domain containing protein expressed
Os05g0545400	2.7	2.44	2.66	8.42	11.59	14.28	2.6	11.43	2.13624	6.8053e-16	3.30922e-14	Up	monocopper oxidase putative expressed
Os02g0738100	1.41	3.93	4.24	8.97	10.87	22.26	3.19333	14.0333	2.13572	6.6696e-06	5.78551e-05	Up	flavin-containing monooxygenase family protein putative expressed
Os10g0542700	0.22	0.35	0.23	1.26	1.73	0.52	0.266667	1.17	2.1334	0.00151028	0.0066767	Up	aldehyde dehydrogenase putative expressed
Os02g0802500	36	36.08	29.24	139.95	132.83	171.57	33.7733	148.117	2.13278	1.4486e-24	1.50259e-22	Up	--
Os12g0443700	97.3	89.54	102.94	468.45	408.31	393.07	96.5933	423.277	2.13161	7.62769e-47	2.62032e-44	Up	--
Os01g0810600	0.61	0.56	0.61	2.39	2.07	3.33	0.593333	2.59667	2.12975	2.26491e-12	6.83925e-11	Up	helix-loop-helix DNA-binding domain containing protein expressed
Os01g0185500	3.57	3.75	5.37	18.14	12.05	25.34	4.23	18.51	2.12958	2.48931e-12	7.45346e-11	Up	Core histone H2A FH2B FH3 FH4 domain containing protein putative expressed
Os11g0594700	0.23	0.22	0.43	1.04	0.87	1.94	0.293333	1.28333	2.12928	0.0049744	0.0183789	Up	vegetative cell wall protein gp1 precursor putative expressed
Os08g0538200	1.19	1.82	1.67	4.18	7.35	8.92	1.56	6.81667	2.12752	1.49423e-08	2.34583e-07	Up	pentatricopeptide containing protein putative expressed
Os05g0535200	0	0.13	0.18	0.49	0.51	0.35	0.103333	0.45	2.12262	0.0166358	0.0497314	Up	peroxisomal biogenesis factor 11 putative expressed
Os07g0209500	0.35	0.07	0.92	1.84	2.1	1.89	0.446667	1.94333	2.12126	0.00145326	0.00646551	Up	CSLA6 - cellulose synthase-like family A%3B mannan synthase expressed
Os12g0268100	6.07	9.1	10.06	35.56	39.4	34.78	8.41	36.58	2.12088	2.03663e-21	1.65985e-19	Up	disease resistance protein RPM1 putative expressed
Os12g0106000	8.24	5.05	6.9	22.27	19.23	46.27	6.73	29.2567	2.12009	2.48424e-09	4.51973e-08	Up	whirly transcription factor domain containing protein expressed
MSTRG.12640	1.05	1.34	0.81	5.47	5.21	3.23	1.06667	4.63667	2.11998	3.19283e-07	3.83765e-06	Up	monooxygenase putative expressed
Os05g0382550	0.86	0.82	1.28	4.17	4.75	3.94	0.986667	4.28667	2.11922	2.00033e-10	4.49129e-09	Up	expressed protein
MSTRG.17341	0.08	0.08	0.25	0.43	0.4	0.95	0.136667	0.593333	2.11818	0.0061384	0.0219288	Up	terpene synthase family metal binding domain containing protein expressed
Os06g0683800	1.25	2.79	2.46	8.27	7.17	12.77	2.16667	9.40333	2.1177	6.82609e-08	9.39189e-07	Up	stress-induced protein putative expressed
Os04g0614700	27.09	28.86	34.86	108.09	148.59	136.27	30.27	130.983	2.11342	8.6786e-28	1.20028e-25	Up	carboxyl-terminal proteinase putative expressed
Os03g0153900	0.67	0.45	0.84	2.38	2.69	3.41	0.653333	2.82667	2.11321	5.24884e-10	1.08608e-08	Up	--
Os12g0629700	302.33	656.43	319.78	1225.39	1416.02	2886.71	426.18	1842.71	2.11229	2.68482e-07	3.2927e-06	Up	abscisic stress-ripening putative expressed
Os07g0238800	0.45	0.65	1.29	3.14	3.73	3.46	0.796667	3.44333	2.11176	7.95694e-09	1.31306e-07	Up	ankyrin repeat family protein putative expressed
Os01g0566500	0.56	0.62	0.62	3.86	1.39	2.52	0.6	2.59	2.10992	7.92634e-07	8.66339e-06	Up	RNA polymerase sigma factor putative expressed
Os04g0632300	0.41	0.24	0.51	1.85	1.59	1.56	0.386667	1.66667	2.1078	4.43343e-10	9.28782e-09	Up	expressed protein
Os01g0694000	0.53	0.19	0.25	1.18	1.14	1.85	0.323333	1.39	2.10399	3.13938e-05	0.000228623	Up	senescence-induced receptor-like serine Fthreonine-protein kinase precursor putative expressed
Os03g0207400	4.73	4.85	3.34	17.37	22.6	15.56	4.30667	18.51	2.10366	2.0612e-14	8.28316e-13	Up	villin protein putative expressed
Os08g0444440	1.97	0.88	0.55	4.98	5.2	4.43	1.13333	4.87	2.10335	3.90889e-05	0.000276776	Up	polygalacturonase putative expressed
MSTRG.168	0.69	0.36	0.13	2.51	1.24	1.32	0.393333	1.69	2.1032	0.0083319	0.0281919	Up	zinc finger family protein putative expressed
Os04g0513900	2.32	1.17	1.32	2.61	2.21	15.77	1.60333	6.86333	2.09784	0.00225411	0.00942348	Up	expressed protein
Os03g0445700	9.92	8.51	5.03	37.77	42.62	19.94	7.82	33.4433	2.09648	2.0708e-08	3.16697e-07	Up	expressed protein
Os06g0548200	3.66	4.66	3.24	16.59	14.28	18.46	3.85333	16.4433	2.09332	2.86379e-17	1.58018e-15	Up	F-box protein interaction domain containing protein expressed
Os05g0132700	0.68	0.59	0.48	3.14	2.28	2.04	0.583333	2.48667	2.09182	4.55445e-09	7.90791e-08	Up	50S ribosomal protein L19 chloroplast precursor putative expressed
MSTRG.2161	2.25	2.96	2.85	9.06	13.4	11.86	2.68667	11.44	2.0902	1.08059e-14	4.53053e-13	Up	NHL repeat-containing protein putative expressed
Os02g0755900	9.21	8.78	7.68	21.03	34.17	53.93	8.55667	36.3767	2.08789	4.00282e-10	8.48588e-09	Up	UDP-glucoronosyl and UDP-glucosyl transferase domain containing protein expressed
Os01g0605000	14.96	15.94	10.32	54.61	65.69	54.84	13.74	58.38	2.08709	2.83123e-16	1.42669e-14	Up	expressed protein
Os08g0191800	0.08	0.25	0.16	0.63	0.61	0.84	0.163333	0.693333	2.08573	0.00295201	0.0118199	Up	aspartic proteinase nepenthesin-1 precursor putative expressed
Os07g0565800	0.13	0.49	0.31	1.1	1.24	1.6	0.31	1.31333	2.08289	0.00190737	0.00816737	Up	DNA repair protein Rad51 putative expressed
Os03g0423300	0.19	0.07	0.08	0.63	0.65	0.16	0.113333	0.48	2.08246	0.01229	0.038887	Up	senescence-induced receptor-like serine Fthreonine-protein kinase precursor putative expressed
Os02g0793500	0.98	0.46	0.83	2.76	3.9	2.95	0.756667	3.20333	2.08184	1.10439e-09	2.16062e-08	Up	zinc finger C3HC4 type domain containing protein expressed
Os11g0481301	0.25	1.06	0.88	4.33	3.72	1.22	0.73	3.09	2.08164	0.00222877	0.00933099	Up	aquaporin protein putative expressed
Os01g0941500	0.22	0.66	0.24	1.94	1.73	1.07	0.373333	1.58	2.08139	0.000639954	0.00321517	Up	glutathione S-transferase putative expressed
Os08g0508700	1.87	1.42	1.69	6.64	6.18	8.22	1.66	7.01333	2.07892	2.55601e-20	1.87292e-18	Up	THION5 - Plant thionin family protein precursor expressed
Os07g0643000	1.81	2.02	1.2	8.46	8.02	4.77	1.67667	7.08333	2.07883	1.28112e-08	2.0434e-07	Up	ATROPGEF7 FROPGEF7 putative expressed
MSTRG.3795	0.33	0.17	1.36	2.29	1.89	3.67	0.62	2.61667	2.07739	0.00135965	0.00612175	Up	indole-3-glycerol phosphate lyase chloroplast precursor putative expressed
Os08g0140300	20.98	17.1	15.73	56.96	84.68	85.08	17.9367	75.5733	2.07497	1.82413e-17	1.03328e-15	Up	protein kinase domain containing protein expressed
Os01g0740650	6.17	6.94	10.82	25.01	30.5	45.29	7.97667	33.6	2.0746	4.23234e-13	1.42632e-11	Up	1-aminocyclopropane-1-carboxylate oxidase homolog 1 putative expressed
MSTRG.14804	0.39	0.27	0.19	1.13	1.52	0.93	0.283333	1.19333	2.07442	0.000740807	0.00364617	Up	tetratricopeptide repeat domain containing protein putative expressed
Os02g0669100	236.88	246.42	237.84	918.47	1203.31	914.27	240.38	1012.02	2.07384	2.11417e-27	2.79106e-25	Up	zinc finger C3HC4 type domain containing protein expressed
Os05g0244700	4.46	8.38	4.63	22.14	25.46	25.85	5.82333	24.4833	2.07188	3.25359e-11	8.29574e-10	Up	actin-depolymerizing factor putative expressed
Os04g0359700	4.37	7.19	6.69	23.39	20.94	32.31	6.08333	25.5467	2.0702	4.70401e-14	1.80847e-12	Up	NB-ARC domain containing protein. (Os04t0205200-00)
Os06g0125200	4.03	9.97	5.17	26.23	21.71	32.55	6.39	26.83	2.06996	2.49298e-08	3.74803e-07	Up	OsSAUR33 - Auxin-responsive SAUR gene family member expressed
Os12g0497300	0.44	0.74	1.44	3.86	4.31	2.83	0.873333	3.66667	2.06986	1.54099e-06	1.56043e-05	Up	pentatricopeptide repeat domain containing protein putative expressed
Os08g0529300	3.2	3.98	3.39	10.27	11.21	22.86	3.52333	14.78	2.06863	3.60016e-09	6.35458e-08	Up	fimbrin-like protein 2 putative expressed
Os04g0172100	0.8	1.34	1.99	7.13	6.01	4.18	1.37667	5.77333	2.06823	1.20323e-08	1.92686e-07	Up	aspartic proteinase nepenthesin precursor putative expressed
Os10g0444500	0.09	0.07	0.21	0.59	0.42	0.54	0.123333	0.516667	2.06667	0.00110867	0.00515049	Up	a_IG002N01.7 putative expressed
Os05g0419301	0.17	0.6	0.5	1.58	1.58	2.15	0.423333	1.77	2.06388	0.00170849	0.00743434	Up	expressed protein
Os03g0383600	0.36	0.89	0.14	1.57	2.93	1.31	0.463333	1.93667	2.06345	0.00212749	0.00897636	Up	--
Os04g0690600	0.51	0.76	0.42	1.71	2.99	2.36	0.563333	2.35333	2.06264	2.43539e-07	3.01222e-06	Up	cytochrome P450 putative expressed
MSTRG.28393	0.18	0.3	0.31	0.77	1.65	0.87	0.263333	1.09667	2.05816	0.000301584	0.00166985	Up	Glutamate dehydrogenase NAD-specific domain containing protein.
Os08g0351200	0.07	0.07	0.05	0.2	0.25	0.34	0.0633333	0.263333	2.05585	0.0112175	0.0361002	Up	stripe rust resistance protein Yr10 putative expressed
Os05g0575000	2.37	1.82	3.15	8.19	8.19	14.12	2.44667	10.1667	2.05496	8.22126e-09	1.35249e-07	Up	--
Os04g0584500	0.05	0.02	0.06	0.15	0.22	0.17	0.0433333	0.18	2.05445	0.00474928	0.0176821	Up	DNA repair metallo-beta-lactamase family protein expressed
Os03g0625800	1.91	1.77	1.69	6.48	8.31	7.51	1.79	7.43333	2.05405	1.81531e-19	1.25685e-17	Up	expressed protein
Os11g0649300	0.48	0.3	0.51	2.07	2.61	0.67	0.43	1.78333	2.05217	0.000180154	0.0010623	Up	ODORANT1 putative expressed
MSTRG.21295	0.3	1.52	0.63	3.59	4.86	1.71	0.816667	3.38667	2.05205	0.00169676	0.0073906	Up	OsWAK45 - OsWAK receptor-like protein kinase expressed
Os02g0129800	19.99	17.14	17.46	75.64	78.18	72.53	18.1967	75.45	2.05185	5.37906e-31	9.14096e-29	Up	THION9 - Plant thionin family protein precursor expressed
Os01g0627900	1.8	1.58	1.17	6.69	5.56	6.6	1.51667	6.28333	2.05063	3.7669e-14	1.46762e-12	Up	EF hand family protein expressed
Os02g0511800	1.81	2.05	2.88	5.37	7.87	14.68	2.24667	9.30667	2.05048	8.27232e-08	1.12127e-06	Up	expressed protein
Os01g0618000	3.1	3.04	1.86	14.07	10.81	8.21	2.66667	11.03	2.04832	1.46087e-09	2.80817e-08	Up	cyclase family protein putative expressed
MSTRG.31723	1.61	0.4	1.31	5.1	4.12	4.51	1.10667	4.57667	2.04808	9.63851e-06	7.97336e-05	Up	expressed protein
Os07g0575600	2.37	2.78	2.87	7.61	12.49	13.06	2.67333	11.0533	2.04777	5.54592e-14	2.10962e-12	Up	flavonol sulfotransferase putative expressed
Os10g0521000	5.34	5.42	6.84	19.58	30.1	22.94	5.86667	24.2067	2.04479	1.32795e-19	9.28347e-18	Up	expressed protein
Os05g0142900	0.35	0.58	0.54	3.5	1.92	0.64	0.49	2.02	2.0435	0.00492872	0.018246	Up	expressed protein
Os12g0123700	4.34	3.47	4.75	10.32	12.42	29.02	4.18667	17.2533	2.043	4.71107e-08	6.71317e-07	Up	--
Os02g0318100	0.98	0.86	2.04	3.54	3.42	9.02	1.29333	5.32667	2.04214	2.32435e-05	0.000174808	Up	cadmium tolerance factor putative expressed
Os03g0661800	0.2	0.31	0.18	0.34	0.88	1.62	0.23	0.946667	2.04122	0.00102956	0.00483074	Up	--
Os01g0627500	26.37	32.07	28.19	110.69	118.94	126.18	28.8767	118.603	2.03817	5.74977e-30	9.13898e-28	Up	dirigent putative expressed
Os01g0184050	0.23	0.33	0.31	1.6	1.25	0.72	0.29	1.19	2.03684	0.00134023	0.00605281	Up	PREDICTED: disease resistance protein RGA2-like [Oryza brachyantha]
Os01g0686700	0.82	0.81	1.01	2.01	4.01	4.81	0.88	3.61	2.03642	1.04414e-06	1.10202e-05	Up	oxidoreductase short chain dehydrogenase Freductase family domain containing family expressed
MSTRG.6288	0.42	0.58	0.43	1.99	1.78	2.09	0.476667	1.95333	2.03489	1.06913e-10	2.50048e-09	Up	fasciclin-like arabinogalactan protein putative expressed
Os01g0127000	0.83	0.42	0.61	2.44	1.29	3.89	0.62	2.54	2.03449	1.0702e-05	8.74218e-05	Up	peroxidase precursor putative expressed
Os04g0634800	2.47	9.14	6.18	25.27	23.43	24.13	5.93	24.2767	2.03347	1.21327e-06	1.25849e-05	Up	elongation factor TS family protein expressed
Os04g0448100	1.38	0.75	1.76	6.43	5.43	4.06	1.29667	5.30667	2.033	5.54015e-09	9.44991e-08	Up	ZOS3-06 - C2H2 zinc finger protein expressed
Os07g0448600	109.25	114.05	84.26	291.27	532.34	434	102.52	419.203	2.03174	4.48405e-13	1.49693e-11	Up	expressed protein
Os04g0538400	0.34	0.33	0.25	1.96	0.8	1	0.306667	1.25333	2.03103	0.000345963	0.00188037	Up	glycosyl hydrolases family 16 putative expressed
Os01g0117900	0.51	1.01	1.42	3.08	4.44	4.49	0.98	4.00333	2.03035	4.78692e-07	5.50513e-06	Up	--
Os01g0878300	12.91	14.22	18.42	55.58	65.02	65.44	15.1833	62.0133	2.03009	4.9222e-30	7.90224e-28	Up	cytochrome P450 putative expressed
Os04g0514150	0.22	0.07	0.1	0.21	0.21	1.17	0.13	0.53	2.02748	0.00566437	0.0204758	Up	leaf senescence related protein putative expressed
Os04g0538900	7.48	7.77	12.3	27.32	27.08	57.8	9.18333	37.4	2.02595	3.32711e-09	5.9151e-08	Up	expressed protein
Os03g0213600	0.33	0.32	0.69	1.67	2.15	1.63	0.446667	1.81667	2.02402	7.51957e-09	1.24862e-07	Up	LTPL86 - Protease inhibitor Fseed storage FLTP family protein precursor expressed
Os03g0618300	51.65	49.37	31.35	179.38	208.19	150.17	44.1233	179.247	2.02233	2.711e-13	9.35326e-12	Up	calcineurin B putative expressed
Os06g0659400	0.07	0.17	0.12	0.19	0.62	0.65	0.12	0.486667	2.0199	0.00871795	0.0293026	Up	PAP fibrillin family domain containing protein expressed
Os03g0571800	0.76	0.34	0.24	1.2	2.96	1.27	0.446667	1.81	2.01872	0.00478124	0.0177804	Up	uncharacterized protein family UPF0016 domain containing protein expressed
Os05g0155800	0.12	0.06	0.22	0.72	0.5	0.4	0.133333	0.54	2.01792	0.00336864	0.0132148	Up	N-dimethylguanosine tRNA methyltransferase putative expressed
Os04g0223500	0.21	0.06	0.2	0.63	0.98	0.29	0.156667	0.633333	2.01527	0.0068621	0.0240025	Up	kelch motif family protein putative expressed
Os02g0160800	0.07	0.17	0.29	0.7	0.52	0.92	0.176667	0.713333	2.01355	0.00171289	0.00744942	Up	calmodulin binding protein putative expressed
Os02g0139000	15.28	19.23	22.95	44.11	50.05	137.79	19.1533	77.3167	2.01318	4.45658e-07	5.16989e-06	Up	CCT FB-box zinc finger protein putative expressed
Os10g0559800	2.98	3.33	2.96	13.24	13.77	10.41	3.09	12.4733	2.01317	3.36286e-20	2.4473e-18	Up	transferase family protein putative expressed
Os03g0266300	23.79	6.26	11.33	47.41	56.76	62.82	13.7933	55.6633	2.01276	9.52743e-07	1.01698e-05	Up	peroxidase precursor putative expressed
Os06g0216300	11.04	12.78	13.11	40.5	56.06	52.4	12.31	49.6533	2.01206	2.38109e-23	2.23738e-21	Up	expressed protein
Os04g0685700	9.52	11.52	10.29	52.63	43.83	29.49	10.4433	41.9833	2.00723	1.40044e-14	5.78052e-13	Up	--
Os03g0571700	0.66	1.01	0.47	2.53	3.62	2.45	0.713333	2.86667	2.00673	2.09572e-06	2.06648e-05	Up	SAM dependent carboxyl methyltransferase family protein putative expressed
Os07g0537400	0.37	0.37	0.6	1.57	2.27	1.54	0.446667	1.79333	2.00537	2.53174e-06	2.44955e-05	Up	SOUL heme-binding protein putative expressed
Os11g0593900	0.09	0.14	0.29	0.84	0.68	0.56	0.173333	0.693333	2	0.000240819	0.00137436	Up	--
Os04g0370500	3.84	4.44	3.84	15.89	17.33	15.21	4.04	16.1433	1.99851	1.2382e-22	1.11118e-20	Up	anthranilate phosphoribosyltransferase putative expressed
Os11g0184800	0.87	1.64	2.35	4.65	6.16	8.55	1.62	6.45333	1.99405	2.07393e-07	2.59962e-06	Up	expressed protein
Os07g0580200	0.06	0.62	0.41	1.13	1.89	1.32	0.363333	1.44667	1.99337	0.00560532	0.0202945	Up	interferon-related developmental regulator family protein putative expressed
Os08g0295300	60.46	60.44	75.8	259.95	256.93	266.23	65.5667	261.037	1.99322	7.61223e-48	2.79535e-45	Up	transmembrane 9 superfamily member putative expressed
Os12g0190400	1.12	1.84	1.58	4.78	4	9.27	1.51333	6.01667	1.99123	3.3162e-07	3.97099e-06	Up	transferase family protein putative expressed
Os10g0452100	6.79	10.26	5.86	40.7	27.31	23.07	7.63667	30.36	1.99116	2.33788e-09	4.28517e-08	Up	expressed protein
Os01g0314800	334.08	501.57	341.73	1826.08	1579.2	1273.67	392.46	1559.65	1.9906	1.8999e-14	7.6833e-13	Up	--
MSTRG.31303	0.54	0.74	0.56	2.39	2.63	2.29	0.613333	2.43667	1.99017	1.9643e-11	5.16505e-10	Up	S-locus-like receptor protein kinase putative expressed
Os01g0743500	0.11	0.09	0.16	0.32	0.37	0.74	0.12	0.476667	1.98995	0.00199989	0.00851445	Up	DUF584 domain containing protein putative expressed
Os06g0128600	1.11	1.56	0.8	3.84	3.71	6.22	1.15667	4.59	1.98852	3.5644e-07	4.23644e-06	Up	Similar to Photosystem II stability/assembly factor HCF136, chloroplastic. (Os06t0729650-00)
Os05g0454500	72.45	96.89	61.21	251.42	350.11	312.34	76.85	304.623	1.98691	5.54677e-14	2.10962e-12	Up	AP2 domain containing protein expressed
Os03g0191800	0.86	1.1	0.75	2.9	4.12	3.7	0.903333	3.57333	1.98394	1.82451e-07	2.31866e-06	Up	cinnamoyl CoA reductase putative expressed
Os12g0114000	6.04	7.71	7.15	24.07	19.41	39.19	6.96667	27.5567	1.98386	5.18622e-11	1.27945e-09	Up	avr9 FCf-9 rapidly elicited protein putative expressed
Os08g0448100	3.53	4.74	4.61	15.26	19.53	16.1	4.29333	16.9633	1.98225	4.72903e-17	2.5564e-15	Up	potassium channel protein putative expressed
Os04g0454900	0.41	0.24	0.34	1.28	1.64	0.99	0.33	1.30333	1.98167	4.0932e-05	0.000288039	Up	phosphoribosyl transferase putative expressed
Os05g0142500	5.32	4.72	1.83	12.72	14.5	19.61	3.95667	15.61	1.98011	4.62249e-05	0.000320345	Up	expressed protein
Os04g0635400	5.81	2.56	3.9	13.09	6.76	28.52	4.09	16.1233	1.97898	0.00011749	0.000727579	Up	protein binding protein putative expressed
Os03g0597400	0.77	0.68	0.45	2.43	2.68	2.38	0.633333	2.49667	1.97897	7.09789e-08	9.74069e-07	Up	zinc finger family protein putative expressed
Os03g0338100	0.25	0.13	0.09	0.51	0.89	0.45	0.156667	0.616667	1.97679	0.00501602	0.0185048	Up	YGGT family protein putative expressed
Os05g0533301	0.48	0.32	0.25	0.7	1.83	1.6	0.35	1.37667	1.97575	0.00228969	0.00955223	Up	PREDICTED: wall-associated receptor kinase 2-like [Oryza sativa Japonica Group]
Os03g0129400	0.47	0.3	0.49	0.81	1.24	2.9	0.42	1.65	1.974	0.00566347	0.0204758	Up	serine Fthreonine-protein kinase receptor precursor putative expressed
Os07g0209100	15.1	16.88	21.15	51.78	45.96	110.61	17.71	69.45	1.97141	1.82866e-09	3.43861e-08	Up	oxidoreductase short chain dehydrogenase Freductase family domain containing protein expressed
Os01g0706800	0.43	0.44	0.12	0.85	1.27	1.76	0.33	1.29333	1.97056	0.0049371	0.0182691	Up	1-phosphatidylinositol-4-phosphate 5-kinase F zinc ion binding protein putative expressed
Os03g0661900	0.29	0.63	0.41	1.6	1.99	1.62	0.443333	1.73667	1.96986	3.76738e-06	3.49073e-05	Up	VQ domain containing protein putative expressed
Os10g0509401	46.37	77.08	64.89	310.9	309.81	116.75	62.78	245.82	1.96923	1.49177e-07	1.92795e-06	Up	glycosyl hydrolases family 16 putative expressed
Os01g0859100	1.36	1.6	1.52	4.13	4.89	8.51	1.49333	5.84333	1.96826	3.42364e-09	6.06647e-08	Up	--
Os07g0673200	10.47	10.97	11.12	25.44	25.36	76.54	10.8533	42.4467	1.96751	1.02853e-06	1.08807e-05	Up	STE_MEKK_ste11_MAP3K.2 - STE kinases include homologs to sterile 7 sterile 11 and sterile 20 from yeast expressed
Os05g0578100	7.34	7.32	4.85	31.96	29.08	15.26	6.50333	25.4333	1.96747	8.61558e-09	1.41009e-07	Up	H-BTB8 - Bric-a-Brac Tramtrack Broad Complex BTB domain with H family conserved sequence expressed
Os09g0442100	5.72	4.82	4.45	14.51	19.34	24.71	4.99667	19.52	1.96592	7.50286e-14	2.78723e-12	Up	Similar to Protein kinase domain containing protein. (Os10t0329900-00)
Os03g0217000	1.16	1.61	1.23	3.78	4.54	7.28	1.33333	5.2	1.96347	2.74947e-06	2.63784e-05	Up	ZOS8-10 - C2H2 zinc finger protein expressed
Os04g0593800	0.13	0.07	0.39	0.82	0.87	0.61	0.196667	0.766667	1.96285	0.0016959	0.00738859	Up	cyclin-dependent kinase C-2 putative expressed
Os03g0575950	0.26	0.17	0.15	0.68	0.7	0.88	0.193333	0.753333	1.9622	0.0103639	0.0338276	Up	3-ketoacyl-CoA synthase putative expressed
Os04g0678400	25.32	52.47	37.2	159.59	205.67	82.47	38.33	149.243	1.96112	1.9909e-07	2.50336e-06	Up	hemimethylated DNA binding domain containing protein expressed
Os12g0511200	2.65	1.81	1.55	8.1	9.4	5.88	2.00333	7.79333	1.95984	1.05604e-09	2.08133e-08	Up	histidine triad family protein putative expressed
Os09g0517800	0.54	0.26	0.44	1.6	1.64	1.58	0.413333	1.60667	1.95869	7.9847e-08	1.08505e-06	Up	peptide transporter PTR2 putative expressed
Os11g0112400	2.79	1.67	1.97	9.77	9.1	6.1	2.14333	8.32333	1.95731	5.04643e-10	1.04827e-08	Up	ulp1 protease family C-terminal catalytic domain containing protein expressed
MSTRG.5072	0.31	0.62	0.18	1.35	1.74	1.22	0.37	1.43667	1.95713	0.000480242	0.0025074	Up	GDSL-like lipase Facylhydrolase putative expressed
Os03g0806600	5.07	9.42	7.78	24.85	28.87	32.68	7.42333	28.8	1.95593	2.68324e-12	7.98177e-11	Up	expressed protein
Os07g0625400	5.78	12.37	7.59	28.35	34.2	37.26	8.58	33.27	1.95517	1.47721e-09	2.83788e-08	Up	PME Finvertase inhibitor putative expressed
Os04g0481800	0.63	0.33	0.22	2.23	1.24	1.1	0.393333	1.52333	1.95341	0.000535279	0.00274893	Up	--
Os04g0352066	1.67	2.39	2.73	6.43	4.99	14.87	2.26333	8.76333	1.95303	0.000168856	0.00100327	Up	enoyl-CoA hydratase Fisomerase family protein expressed
MSTRG.2130	0.12	0.2	0.22	0.6	0.68	0.81	0.18	0.696667	1.95247	0.000505656	0.00262294	Up	DUF630 FDUF632 domains containing protein putative expressed
Os12g0111700	0.72	1.03	1.18	3.97	3.76	3.6	0.976667	3.77667	1.95118	8.08475e-08	1.09771e-06	Up	DNA binding protein putative expressed
Os11g0673200	2.89	3.57	4.88	9.87	13.28	20.64	3.78	14.5967	1.94918	2.01199e-10	4.51397e-09	Up	MYB family transcription factor putative expressed
Os01g0947500	1.43	2.26	2.47	7.12	7.26	9.39	2.05333	7.92333	1.94814	9.68619e-09	1.56686e-07	Up	--
Os01g0283300	21.8	17.78	13.96	66.64	79.4	60.51	17.8467	68.85	1.9478	1.11014e-14	4.64832e-13	Up	expressed protein
Os04g0676800	1.37	1.16	1.58	5.59	6	4.26	1.37	5.28333	1.94727	4.2798e-13	1.43776e-11	Up	heavy metal-associated domain containing protein expressed
Os05g0177000	1.93	2.15	2.25	7.89	9.11	7.41	2.11	8.13667	1.94719	1.45728e-19	1.01653e-17	Up	--
Os03g0437200	4.94	5.23	3.56	8.04	15.71	29.07	4.57667	17.6067	1.94375	7.68503e-06	6.54745e-05	Up	--
MSTRG.11338	0.33	0.48	0.37	1.08	1.01	2.44	0.393333	1.51	1.94072	0.00536985	0.0195639	Up	NLI interacting factor-like phosphatase putative expressed
Os01g0719000	7.35	8.77	6.63	34.17	33.93	19.2	7.58333	29.1	1.94012	3.29365e-11	8.38451e-10	Up	expressed protein
MSTRG.167	0.4	0.3	0.6	1.28	2.01	1.69	0.433333	1.66	1.93763	1.55754e-08	2.43803e-07	Up	OsWAK95 - OsWAK receptor-like protein kinase expressed
Os03g0305600	0.93	0.23	0.18	2.19	0.92	2.02	0.446667	1.71	1.93673	0.00820679	0.0278482	Up	expressed protein
Os07g0448400	76.09	72.89	60.65	215.96	308.91	277.09	69.8767	267.32	1.93569	1.45801e-17	8.31797e-16	Up	thionin precursor protein putative expressed
Os12g0159700	0.32	0.49	0.49	1.7	1.38	1.89	0.433333	1.65667	1.93473	7.5789e-08	1.03342e-06	Up	BURP domain containing protein expressed
Os01g0950000	2.37	3.16	3.03	11.38	12.39	8.94	2.85333	10.9033	1.93405	2.67238e-13	9.22997e-12	Up	expressed protein
Os08g0538600	54.44	60.48	65.13	199.7	238.03	250.11	60.0167	229.28	1.93368	8.52128e-31	1.42533e-28	Up	retrotransposon protein putative unclassified expressed
Os03g0758050	1.19	1.85	1.26	4.71	4.59	7.12	1.43333	5.47333	1.93305	4.34775e-08	6.23437e-07	Up	fatty acid hydroxylase putative expressed
Os01g0532700	0.49	0.32	0.5	1.41	1.5	2.09	0.436667	1.66667	1.93236	2.0004e-08	3.07254e-07	Up	cytochrome P450 putative expressed
MSTRG.32560	0.95	1.69	2.4	8.37	8.72	2.14	1.68	6.41	1.93186	0.000251567	0.00142704	Up	nucleobase-ascorbate transporter putative expressed
Os02g0540400	1.18	1.4	1.52	3.82	5.38	6.44	1.36667	5.21333	1.93154	6.14955e-09	1.03815e-07	Up	lysine-rich arabinogalactan protein 19 precursor putative expressed
Os05g0121750	0.78	0.32	1.72	3.56	2.74	4.45	0.94	3.58333	1.93057	0.00543311	0.0197606	Up	purine permease putative expressed
Os04g0640200	0.15	0.07	0.19	0.57	0.37	0.62	0.136667	0.52	1.92785	8.51054e-05	0.000550172	Up	BAG domain-containing protein putative expressed
Os03g0777000	2.61	3.67	3	9.79	11.02	14.49	3.09333	11.7667	1.92747	3.99895e-13	1.34909e-11	Up	dehydrogenase putative expressed
Os02g0742700	0.07	0.11	0.12	0.38	0.31	0.45	0.1	0.38	1.926	0.00682199	0.0238927	Up	--
Os11g0126900	5.87	6.51	9.16	15.21	19.44	47.13	7.18	27.26	1.92473	9.56321e-07	1.02046e-05	Up	cytochrome P450 putative expressed
Os05g0182650	0.27	0.21	0.25	0.92	1.06	0.79	0.243333	0.923333	1.92392	0.00931714	0.0309647	Up	aminotransferase classes I and II domain containing protein expressed
Os09g0547900	0.15	0.12	0.44	0.83	0.64	1.22	0.236667	0.896667	1.92172	0.000315286	0.00173459	Up	expressed protein
Os05g0500600	1.12	0.73	0.68	2.76	4.69	2.12	0.843333	3.19	1.91938	4.96387e-06	4.44467e-05	Up	expressed protein
Os02g0555200	0.14	0.2	0.25	0.52	0.83	0.88	0.196667	0.743333	1.91826	7.90275e-05	0.0005147	Up	--
Os07g0554900	0.19	0.77	0.44	1.64	2.51	1.14	0.466667	1.76333	1.91784	0.000481134	0.00251082	Up	plant invertase Fpectin methylesterase inhibitor domain containing protein expressed
MSTRG.10022	0.39	0.21	0.39	0.54	1.81	1.39	0.33	1.24667	1.91754	0.00213831	0.00901605	Up	CSLA5 - cellulose synthase-like family A%3B mannan synthase expressed
Os05g0477500	0.22	0.09	0.25	0.58	0.53	1	0.186667	0.703333	1.91374	0.00183295	0.00789738	Up	TTL1 putative expressed
Os05g0509500	2.88	4.88	4.51	11.45	14.4	20.37	4.09	15.4067	1.91338	1.85297e-10	4.18958e-09	Up	heavy metal-associated domain containing protein expressed
Os11g0160400	4.14	5.22	3.21	16.61	19.32	11.41	4.19	15.78	1.91308	1.52345e-09	2.90922e-08	Up	--
Os04g0407300	0.25	0.14	0.2	0.79	0.72	0.71	0.196667	0.74	1.91177	0.0004736	0.00247636	Up	kinesin-related protein putative expressed
Os01g0718500	2.1	2.5	2.13	6.36	6.44	12.52	2.24333	8.44	1.9116	1.39072e-06	1.42105e-05	Up	transferase family protein putative expressed
Os02g0271600	1.26	1.41	1.92	3.88	4.87	8.51	1.53	5.75333	1.91087	1.6799e-08	2.61293e-07	Up	glucan endo-1 3-beta-glucosidase-related putative expressed
MSTRG.5386	0.25	0.24	0.09	0.88	0.5	0.8	0.193333	0.726667	1.9102	0.0107058	0.034766	Up	flavin monooxygenase putative expressed
Os04g0526200	0.16	0.1	0.03	0.54	0.36	0.19	0.0966667	0.363333	1.9102	0.0121839	0.0386239	Up	ATOZI1 putative expressed
MSTRG.17358	0.11	0.04	0.14	0.26	0.52	0.31	0.0966667	0.363333	1.9102	0.0150708	0.0459472	Up	wall-associated receptor kinase-like 22 precursor putative expressed
Os08g0549950	1.28	1.27	1.1	4.14	5.68	3.88	1.21667	4.56667	1.90821	3.63365e-07	4.31233e-06	Up	--
Os12g0527500	0.44	1.15	0.84	3.14	2.86	3.12	0.81	3.04	1.90808	3.96787e-07	4.65707e-06	Up	12-oxophytodienoate reductase putative expressed
Os06g0161400	0.52	0.76	0.84	2.63	3.06	2.26	0.706667	2.65	1.90689	2.68992e-10	5.91856e-09	Up	APE1 putative expressed
Os06g0704000	0.77	0.53	1.01	3.19	3.03	2.44	0.77	2.88667	1.90647	1.55133e-10	3.55027e-09	Up	bHelix-loop-helix transcription factor putative expressed
Os06g0198500	1.86	1.38	2.41	6.94	7.72	6.5	1.88333	7.05333	1.90502	2.71588e-10	5.96746e-09	Up	protein kinase domain containing protein expressed
Os07g0629300	0.91	0.12	0.89	2.23	1.78	3.18	0.64	2.39667	1.90489	0.006709	0.0235926	Up	DUF623 domain containing protein expressed
MSTRG.15160	2.26	3.42	4.13	7.86	10.76	18.11	3.27	12.2433	1.90463	7.44555e-08	1.01698e-06	Up	phosphatidylinositol-4-phosphate 5-kinase putative expressed
Os02g0580600	0.91	0.94	0.84	2.86	2.83	4.37	0.896667	3.35333	1.90295	3.42697e-09	6.06901e-08	Up	--
MSTRG.22742	0.63	0.76	0.71	1.54	2.69	3.61	0.7	2.61333	1.90046	1.92676e-05	0.000147581	Up	BTBN23 - Bric-a-Brac Tramtrack Broad Complex BTB domain with non-phototropic hypocotyl 3 NPH3 and coiled-coil domains expressed
Os01g0173900	13.69	12.77	15.15	49.94	47.92	57.45	13.87	51.77	1.90015	3.60834e-38	8.47641e-36	Up	cyclin-related protein putative expressed
Os09g0436500	76.84	78.38	121.04	321.08	363.67	345.35	92.0867	343.367	1.89869	1.6589e-22	1.46405e-20	Up	--
Os01g0946600	103.26	148.24	104.24	281.98	401.53	641.35	118.58	441.62	1.89694	5.5209e-09	9.42211e-08	Up	PREDICTED: homeobox-leucine zipper protein ROC8 [Oryza sativa Japonica Group]
Os01g0681000	2.17	1.41	1.84	4.44	6.28	9.46	1.80667	6.72667	1.89656	9.45669e-09	1.5344e-07	Up	ubiquitin carboxyl-terminal hydrolase domain containing protein expressed
Os02g0134200	6.19	11.69	10.72	39.14	39.87	27.47	9.53333	35.4933	1.8965	1.01125e-10	2.37205e-09	Up	lectin-like receptor kinase 7 putative expressed
Os01g0609501	2.7	5.91	6.63	8.24	12.12	36.37	5.08	18.91	1.89625	0.000330155	0.00180458	Up	retrotransposon protein putative unclassified expressed
MSTRG.5110	0.21	0.38	0.23	0.7	1.24	1.11	0.273333	1.01667	1.89511	0.000123001	0.000757303	Up	BTBN22 - Bric-a-Brac Tramtrack Broad Complex BTB domain with non-phototropic hypocotyl 3 NPH3 and coiled-coil domains expressed
Os01g0885500	1.97	1.45	1.37	5.87	6.88	5.03	1.59667	5.92667	1.89216	1.69429e-11	4.52206e-10	Up	thaumatin putative expressed
MSTRG.6191	0.97	0.91	1.15	2.32	2.91	5.99	1.01	3.74	1.88868	3.47725e-06	3.25113e-05	Up	RNA recognition motif containing protein putative expressed
Os02g0740600	16.07	24.25	18.97	53.93	55.33	110.16	19.7633	73.14	1.88783	1.33809e-08	2.12683e-07	Up	homeobox domain containing protein expressed
Os02g0694100	0.97	0.53	1.3	2.74	3.28	4.34	0.933333	3.45333	1.88753	1.02139e-07	1.35737e-06	Up	receptor-like protein kinase 5 precursor putative expressed
Os04g0403900	43.66	91.68	77.57	392.64	333.45	60.24	70.97	262.11	1.88489	0.0135684	0.0421994	Up	DUF567 domain containing protein putative expressed
Os08g0499300	1.16	0.62	0.81	1.6	2.69	5.27	0.863333	3.18667	1.88406	6.38713e-05	0.000425294	Up	VQ motif family protein expressed
Os01g0954000	15.63	18.57	16.04	51.63	61.7	72.11	16.7467	61.8133	1.88404	3.05838e-18	1.88264e-16	Up	--
MSTRG.4668	0.32	0.43	0.12	0.66	1.26	1.29	0.29	1.07	1.88349	0.00139973	0.0062678	Up	thaumatin family domain containing protein expressed
MSTRG.19986	0.26	0.63	0.17	1.23	1.19	1.49	0.353333	1.30333	1.8831	0.00259183	0.0105996	Up	phenylalanine ammonia-lyase putative expressed
Os04g0600200	45.79	56.39	46.29	169.7	175.99	201.22	49.49	182.303	1.88113	3.17619e-22	2.73512e-20	Up	ICE-like protease p20 domain containing protein putative expressed
MSTRG.8721	0.73	1.77	2.71	6.77	8.99	3.39	1.73667	6.38333	1.87799	0.000122968	0.000757246	Up	expansin precursor putative expressed
Os03g0296600	0.77	1.27	1.17	6.34	4.29	1.16	1.07	3.93	1.87692	0.00192342	0.00822506	Up	Putative harbinger transposase-derived nuclease domain containing protein.
Os03g0724500	4.18	6.09	5.95	16.69	19.41	23.47	5.40667	19.8567	1.87681	4.41012e-13	1.47435e-11	Up	expressed protein
Os05g0151700	0.66	0.83	1.19	3.41	4.13	2.3	0.893333	3.28	1.87643	1.25563e-06	1.29822e-05	Up	thylakoid lumenal 19 kDa protein chloroplast precursor putative expressed
Os10g0547200	0.43	1.76	1.18	3.66	5.43	3.27	1.12333	4.12	1.87486	0.000195044	0.00113938	Up	carboxyl-terminal peptidase putative expressed
Os11g0237900	0.05	0.06	0.1	0.26	0.18	0.33	0.07	0.256667	1.87447	0.00623492	0.0222102	Up	expressed protein
Os03g0340500	13.57	15.16	17.15	51.43	51.91	64.81	15.2933	56.05	1.87381	2.0818e-26	2.50036e-24	Up	AGC_PVPK_like_kin82y.20 - ACG kinases include homologs to PKA PKG and PKC expressed
Os01g0151900	1.17	0.88	1.44	4.84	5.38	2.56	1.16333	4.26	1.87259	4.38729e-08	6.28543e-07	Up	CSLF7 - cellulose synthase-like family F%3B beta1 3%3B1 4 glucan synthase expressed
Os04g0415800	11.24	11.18	4.66	33.87	47.76	17.52	9.02667	33.05	1.87239	4.73341e-05	0.000327069	Up	expressed protein
Os08g0330900	2.06	3.87	4.32	11.89	12.47	13.11	3.41667	12.49	1.87011	7.82259e-10	1.57875e-08	Up	GDSL-like lipase Facylhydrolase putative expressed
Os01g0588000	1	1.29	0.45	3.19	4.87	1.95	0.913333	3.33667	1.86919	0.000437606	0.00231544	Up	expressed protein
Os04g0543000	0.28	0.75	0.84	1.85	2.15	2.83	0.623333	2.27667	1.86885	1.40917e-05	0.000111746	Up	expressed protein
MSTRG.29558	0.03	0.31	0.09	0.57	0.39	0.61	0.143333	0.523333	1.86836	0.0143335	0.044078	Up	--
Os05g0205400	1.54	2.02	2	7.53	7.53	5.24	1.85333	6.76667	1.86832	7.74974e-06	6.58958e-05	Up	expressed protein
Os04g0486950	28.4	29.22	13.96	65.04	122.07	74.2	23.86	87.1033	1.86813	3.8839e-07	4.5804e-06	Up	--
MSTRG.3500	3.1	2.53	2.71	13.33	10.13	6.97	2.78	10.1433	1.86738	3.33756e-08	4.8912e-07	Up	protease inhibitor Fseed storage FLTP family putative expressed
Os08g0529100	9.35	13.86	9.67	35.79	43.12	40.98	10.96	39.9633	1.86643	5.88514e-14	2.22244e-12	Up	--
Os03g0287100	6.94	10.84	8.82	22.44	33.77	40.77	8.86667	32.3267	1.86626	2.12218e-10	4.7379e-09	Up	--
Os03g0258200	9.98	8.8	5.92	25.58	35.88	28.22	8.23333	29.8933	1.86028	6.23237e-11	1.5211e-09	Up	--
Os03g0373500	0.98	1.55	1.92	3.75	4.61	7.78	1.48333	5.38	1.85876	2.21584e-06	2.17287e-05	Up	--
Os05g0499100	2.64	2.73	0.66	6.07	7.95	7.84	2.01	7.28667	1.85806	0.000347239	0.00188667	Up	thioesterase family protein putative expressed
Os08g0526150	0.27	0.75	0.12	0.8	1.77	1.56	0.38	1.37667	1.85711	0.00873643	0.0293554	Up	glucosyltransferase putative expressed
Os09g0451133	1.06	1.49	1.86	7.14	5.9	2.93	1.47	5.32333	1.85651	3.60226e-06	3.35427e-05	Up	methyladenine glycosylase putative expressed
Os01g0299100	0.49	0.23	0.33	0.93	1.16	1.71	0.35	1.26667	1.85561	0.00273306	0.0110779	Up	plant protein of unknown function DUF869 domain containing protein expressed
Os03g0826900	0.72	0.45	0.32	1.61	1.47	2.31	0.496667	1.79667	1.85497	8.12564e-05	0.000527531	Up	phosphoethanolamine Fphosphocholine phosphatase putative expressed
Os12g0582666	0.12	0.26	0.09	0.51	0.8	0.39	0.156667	0.566667	1.8548	0.00620245	0.0221107	Up	HEAT repeat family protein putative expressed
Os01g0608900	0.72	1.08	1.39	3.85	3.58	4.1	1.06333	3.84333	1.85376	1.90531e-11	5.03898e-10	Up	ras-related protein putative expressed
Os09g0325100	2.89	4.14	3.08	13.89	13.43	9.19	3.37	12.17	1.85251	7.25304e-09	1.20625e-07	Up	peptide-N4-asparagine amidase A putative expressed
Os03g0250000	22.33	25.03	29.98	56.06	102.89	120.27	25.78	93.0733	1.85212	9.20036e-11	2.17567e-09	Up	--
Os02g0527300	0.51	0.6	0.5	1.71	1.87	2.23	0.536667	1.93667	1.85148	2.23541e-08	3.39596e-07	Up	lysM domain-containing GPI-anchored protein precursor putative expressed
Os01g0121600	8.56	8.89	12.86	31.29	48.25	29.83	10.1033	36.4567	1.85135	5.08685e-12	1.46146e-10	Up	expressed protein
Os03g0565900	0.26	0.1	0.38	0.81	1.04	0.82	0.246667	0.89	1.85124	0.000120234	0.000742987	Up	transposon protein putative unclassified expressed
Os02g0282900	18	17.37	27.22	78.96	60.5	86.23	20.8633	75.23	1.85034	1.19104e-17	6.8809e-16	Up	U-box domain-containing protein putative expressed
Os07g0180800	0.77	0.54	0.8	2.78	1.96	2.86	0.703333	2.53333	1.84876	2.29654e-07	2.85123e-06	Up	PREDICTED: cinnamoyl-CoA reductase 1 isoform X1 [Oryza sativa Japonica Group]
Os03g0233300	1.17	0.89	1.1	3.85	4.87	2.66	1.05333	3.79333	1.8485	1.09064e-09	2.13898e-08	Up	Os3bglu8 - beta-glucosidase exo-beta-glucansase high similarity to Os3bglu7 expressed
Os06g0160700	1.48	0.7	1.78	4.05	3.77	6.44	1.32	4.75333	1.8484	2.25204e-07	2.80173e-06	Up	expressed protein
Os05g0205050	7.34	9.96	9.03	20.66	28.18	45.95	8.77667	31.5967	1.84803	1.4426e-08	2.27483e-07	Up	expressed protein
MSTRG.6362	0.39	0.17	0.24	0.99	0.84	1.05	0.266667	0.96	1.848	0.00190341	0.00815148	Up	polygalacturonase inhibitor 3 precursor putative expressed
Os01g0884350	28.36	31.41	32.2	78.5	104.35	148.17	30.6567	110.34	1.84768	9.04604e-13	2.90455e-11	Up	expressed protein
MSTRG.23133	14.3	14.48	11.26	46.58	55.95	41.58	13.3467	48.0367	1.84766	5.03741e-15	2.20459e-13	Up	dehydrogenase putative expressed
Os07g0575733	0.93	0.45	0.67	1.36	3.28	2.73	0.683333	2.45667	1.84604	0.00281324	0.0113596	Up	--
Os04g0626300	0.25	0.11	0.33	0.74	0.54	1.2	0.23	0.826667	1.84567	0.00014004	0.000848794	Up	FabA-like domain containing protein expressed
Os01g0511000	22.56	33.45	24.24	102.82	82.02	103.42	26.75	96.0867	1.8448	1.07937e-14	4.53053e-13	Up	--
Os01g0121500	3.1	1.96	2.11	8.86	7.87	8.99	2.39	8.57333	1.84285	1.38692e-09	2.6773e-08	Up	expressed protein
Os06g0134500	2.14	2.27	2.47	9.34	7.77	7.52	2.29333	8.21	1.83994	4.01942e-17	2.18389e-15	Up	expressed protein
Os04g0371600	0.5	0.39	0.18	0.9	1.75	1.18	0.356667	1.27667	1.83973	0.000483597	0.00252244	Up	expressed protein
Os01g0873100	1.42	0.32	0.67	1.97	3.78	2.87	0.803333	2.87333	1.83865	0.00211296	0.00892333	Up	AAA-type ATPase family protein putative expressed
Os01g0588400	9.15	9.65	7.37	27.51	35.28	30.72	8.72333	31.17	1.83721	1.89416e-15	8.66971e-14	Up	dirigent putative expressed
Os06g0536200	3.99	3.67	3.21	14.61	16.29	7.93	3.62333	12.9433	1.83682	2.28889e-07	2.84314e-06	Up	NBS-LRR type disease resistance protein putative expressed
Os07g0256200	1.41	1.8	1.84	5.06	5.45	7.52	1.68333	6.01	1.83604	1.03127e-13	3.76967e-12	Up	--
Os05g0102400	4.57	5.14	6	14.74	14.48	26.82	5.23667	18.68	1.83477	9.14973e-10	1.82583e-08	Up	OsSCP43 - Putative Serine Carboxypeptidase homologue expressed
MSTRG.9782	1.13	0.89	0.98	3.93	3.58	3.19	1	3.56667	1.83458	1.45992e-12	4.52392e-11	Up	MCM10 - Putative minichromosome maintenance MCM protein 10 expressed
Os09g0486500	46.86	45.31	37.64	154.68	164.65	143.53	43.27	154.287	1.83417	1.67509e-20	1.25037e-18	Up	glutathione peroxidase putative expressed
Os12g0258700	68.1	86.65	80.89	130.4	169.34	540.11	78.5467	279.95	1.83355	4.49247e-05	0.000312215	Up	expressed protein
Os08g0538100	2.08	3.52	1.6	6.92	9.54	9.19	2.4	8.55	1.83289	5.92664e-07	6.6694e-06	Up	glycine-rich cell wall structural protein 2 precursor putative expressed
Os02g0568600	1.88	0.95	1.65	4.39	5.66	5.91	1.49333	5.32	1.83289	1.79042e-06	1.78919e-05	Up	KIP1 putative expressed
Os02g0767200	13.72	12.93	10.46	34.53	33.83	63.72	12.37	44.0267	1.83153	1.04111e-09	2.05572e-08	Up	expressed protein
Os08g0265000	0.05	0.28	0.1	0.29	0.57	0.67	0.143333	0.51	1.83112	0.0100463	0.0329356	Up	--
MSTRG.26356	0.22	0.31	0.41	1.26	0.91	1.17	0.313333	1.11333	1.82912	0.00166039	0.00725466	Up	retrotransposon protein putative Ty3-gypsy subclass expressed
Os02g0589500	1	0.73	1.99	4.11	4.94	4.16	1.24	4.40333	1.82826	5.35973e-06	4.74986e-05	Up	peroxiredoxin putative expressed
Os04g0269100	0.44	0.42	0.32	1.14	1.08	1.97	0.393333	1.39667	1.82816	0.000983359	0.00465014	Up	PREDICTED: universal stress protein PHOS32 [Eucalyptus grandis]
Os01g0740600	10.84	10.2	12.43	31.57	37.85	49.35	11.1567	39.59	1.82723	1.00328e-14	4.22861e-13	Up	expressed protein
Os07g0631300	20.96	23.47	15.36	68.09	74.18	69.66	19.93	70.6433	1.82561	1.21932e-13	4.40665e-12	Up	senescence-induced receptor-like serine Fthreonine-protein kinase precursor putative expressed
Os06g0681100	0.22	0.09	0.15	0.65	0.35	0.63	0.153333	0.543333	1.82517	0.00285914	0.0115086	Up	expressed protein
Os06g0594400	0.67	1.4	0.62	3.06	4.18	2.29	0.896667	3.17667	1.82487	5.9607e-05	0.000400152	Up	S1 RNA binding domain containing protein expressed
Os10g0471000	0.43	0.62	0.74	1.73	2.21	2.4	0.596667	2.11333	1.82452	2.93798e-06	2.79853e-05	Up	aspartic proteinase oryzasin-1 precursor putative expressed
Os02g0584700	9.29	9.32	11.83	29.79	36.09	41.91	10.1467	35.93	1.82418	1.01775e-17	5.92258e-16	Up	AP2 domain containing protein expressed
Os01g0136300	2.24	1.65	2.34	7.98	8.89	5.19	2.07667	7.35333	1.82413	3.14857e-08	4.63764e-07	Up	UDP-glucoronosyl and UDP-glucosyl transferase domain containing protein expressed
Os02g0612900	34.15	15.51	19.97	61.02	103.34	82.17	23.21	82.1767	1.82398	3.37936e-08	4.9502e-07	Up	expressed protein
Os05g0585700	3.25	3.41	1.63	10.16	11.47	7.71	2.76333	9.78	1.82342	2.9649e-06	2.82165e-05	Up	nuclear transport factor putative expressed
Os06g0594300	0.59	1.24	0.55	2.72	3.68	2.02	0.793333	2.80667	1.82286	5.62387e-05	0.000379935	Up	expressed protein
Os03g0178300	0.16	0.33	0.07	0.65	0.56	0.77	0.186667	0.66	1.822	0.0110304	0.0355996	Up	isochorismate synthase 1 chloroplast precursor putative expressed
Os06g0624900	36.04	46.54	39.62	118.89	150.9	161.64	40.7333	143.81	1.81988	1.45566e-17	8.31797e-16	Up	expressed protein
Os11g0528400	0.29	0.31	0.78	1.89	1.66	1.32	0.46	1.62333	1.81925	5.14966e-05	0.000352068	Up	expansin precursor putative expressed
Os03g0184550	1.78	2.72	2.24	6.17	6.94	10.67	2.24667	7.92667	1.81893	1.4149e-08	2.23557e-07	Up	BEE 3 putative expressed
Os01g0959100	2.08	3.01	3.36	6.62	8.95	14.24	2.81667	9.93667	1.81877	1.49892e-06	1.52024e-05	Up	GEM putative expressed
Os04g0351933	1.73	3.19	5.19	4.47	7.08	24.07	3.37	11.8733	1.8169	0.00681575	0.0238787	Up	--
MSTRG.25079	0.19	0.24	0.22	0.88	0.6	0.81	0.216667	0.763333	1.81684	8.47673e-06	7.13233e-05	Up	acetyl-CoA acetyltransferase cytosolic putative expressed
MSTRG.29755	2.08	2.62	1.87	8.1	8.7	6.32	2.19	7.70667	1.81518	5.26318e-08	7.42375e-07	Up	expressed protein
Os01g0286900	1.64	1.32	1.37	5.04	6.35	3.84	1.44333	5.07667	1.81448	9.54947e-08	1.27491e-06	Up	2Fe-2S iron-sulfur cluster binding domain containing protein expressed
Os03g0165266	0.1	0.25	0.29	0.86	0.7	0.69	0.213333	0.75	1.81378	7.65303e-05	0.000500305	Up	ATEB1A-like microtubule associated protein putative expressed
Os02g0793400	0.14	0.06	0.13	0.33	0.35	0.48	0.11	0.386667	1.81359	0.0135184	0.0420491	Up	expressed protein
Os05g0535100	0.28	0.08	0.38	0.97	0.75	0.88	0.246667	0.866667	1.81291	0.000789959	0.00384544	Up	expansin precursor putative expressed
Os01g0631500	4.47	3.55	2.67	14.17	17.22	6.16	3.56333	12.5167	1.81255	7.08435e-06	6.09728e-05	Up	oxidoreductase aldo Fketo reductase family protein putative expressed
Os08g0127800	0.86	2.04	1.89	4.41	7.61	4.8	1.59667	5.60667	1.81208	9.29146e-06	7.71824e-05	Up	B-box zinc finger family protein putative expressed
Os01g0686000	2.68	3.96	4.5	13.73	23.17	2.13	3.71333	13.01	1.80883	0.00344521	0.0134573	Up	tetratricopeptide repeat domain containing protein expressed
Os05g0583400	7.27	10.56	8.14	43	34.8	13.18	8.65667	30.3267	1.8087	8.92258e-06	7.45446e-05	Up	NBS-LRR disease resistance protein putative expressed
MSTRG.27085	0.42	0.66	0.81	2.34	2.42	1.84	0.63	2.2	1.80408	0.000230796	0.00132544	Up	expressed protein
Os02g0733900	1.01	1.01	0.71	1.91	2.88	4.72	0.91	3.17	1.80054	0.000433263	0.0022955	Up	--
Os12g0245000	6.56	2.34	8.9	20.8	19.64	21.49	5.93333	20.6433	1.79876	1.33132e-06	1.3685e-05	Up	FAD dependent oxidoreductase domain containing protein expressed
Os01g0838300	3.98	4.7	1.61	11.85	14.33	9.59	3.43	11.9233	1.79751	5.20686e-05	0.000355294	Up	phytosulfokines precursor putative expressed
Os01g0841700	15.64	20.17	19.82	38.84	43.41	111.1	18.5433	64.45	1.79728	3.02319e-06	2.87028e-05	Up	elongation factor putative expressed
MSTRG.9803	0.71	1.31	2	4.02	5.14	4.8	1.34	4.65333	1.79603	1.93149e-07	2.43698e-06	Up	ribosomal protein putative expressed
Os03g0226300	0.06	0.15	0.49	0.66	0.81	0.96	0.233333	0.81	1.79553	0.00782031	0.0268175	Up	transferase family protein putative expressed
Os07g0622400	2.22	2.81	1.66	7.34	8.04	7.83	2.23	7.73667	1.79467	4.80142e-09	8.30513e-08	Up	pectinesterase putative expressed
Os03g0836600	0.49	0.57	0.37	1.17	1.8	1.99	0.476667	1.65333	1.79432	1.99257e-06	1.97391e-05	Up	UTPglucose-1-phosphate uridylyltransferase putative expressed
Os01g0800500	4.8	4.42	5.76	13.84	14.13	23.98	4.99333	17.3167	1.79409	6.098e-12	1.73481e-10	Up	bifunctional monodehydroascorbate reductase and carbonic anhydrasenectarin-3 precursor putative expressed
Os04g0185600	0.13	0.13	0.15	0.33	0.48	0.61	0.136667	0.473333	1.7922	0.00326698	0.012865	Up	leucine-rich repeat family protein putative expressed
Os09g0559600	1.08	1.32	1.62	5.3	3.82	4.8	1.34	4.64	1.79189	8.2964e-07	9.02156e-06	Up	--
MSTRG.7930	0.91	0.52	0.84	2.66	2.46	2.74	0.756667	2.62	1.79184	7.70117e-08	1.04875e-06	Up	--
Os02g0749700	5.43	3.35	4.18	7.3	4.97	32.6	4.32	14.9567	1.79169	0.00156759	0.00690207	Up	--
MSTRG.30938	0.91	0.29	0.23	1.58	2.34	1.03	0.476667	1.65	1.79141	0.00916642	0.0305531	Up	aspartyl protease family protein putative expressed
Os06g0128700	4.93	5.43	4.84	17.76	18.15	16.68	5.06667	17.53	1.79072	6.10479e-21	4.69966e-19	Up	expressed protein
MSTRG.31753	1.4	1.94	1.36	6.48	5.18	4.59	1.56667	5.41667	1.78971	6.87892e-07	7.6176e-06	Up	expressed protein
Os10g0568100	0.52	0.41	1.15	2.11	2.37	2.71	0.693333	2.39667	1.78941	1.44045e-05	0.000113916	Up	cytokinin-O-glucosyltransferase 2 putative expressed
Os01g0136100	0.42	0.81	0.28	0.78	1.76	2.67	0.503333	1.73667	1.78673	0.00843229	0.0284712	Up	--
Os05g0380900	2.11	3.11	3.05	6.02	8.41	14.1	2.75667	9.51	1.78652	1.13507e-06	1.18624e-05	Up	expressed protein
Os07g0141700	0.23	0.42	0.73	1.21	1.91	1.64	0.46	1.58667	1.78629	4.08648e-05	0.000287675	Up	pleckstrin homology domain-containing protein-related taxo putative expressed
Os03g0233900	96.61	180.73	75.81	404.53	325.57	487.28	117.717	405.793	1.78543	5.54266e-07	6.29687e-06	Up	expressed protein
Os03g0810500	0.96	2.24	1.69	3.78	4.28	8.79	1.63	5.61667	1.78484	0.000241919	0.00137941	Up	laccase precursor protein putative expressed
Os11g0607900	0.7	1.12	1.39	1.94	1.8	7.32	1.07	3.68667	1.78471	0.000682975	0.00339606	Up	carboxyl-terminal peptidase putative expressed
Os03g0741000	0.86	0.58	2.31	1.62	1.82	9.47	1.25	4.30333	1.78353	0.0115824	0.0370777	Up	expressed protein
Os11g0467966	0.21	0.3	0.4	1.05	0.8	1.28	0.303333	1.04333	1.78222	0.00283785	0.0114402	Up	GIL1 putative expressed
Os05g0595100	76.48	78.47	104.04	197.58	231.35	461.46	86.33	296.797	1.78154	1.26007e-08	2.01284e-07	Up	expressed protein
Os07g0575700	3.91	4.87	4.3	10.73	17.66	16.55	4.36	14.98	1.78064	6.54764e-12	1.85283e-10	Up	wound-induced protein WI12 putative expressed
Os05g0427200	6.3	3.42	5.79	13.45	17.13	22.67	5.17	17.75	1.77958	8.66202e-10	1.7361e-08	Up	--
Os06g0235850	0.86	0.68	0.89	2.5	3.09	2.75	0.81	2.78	1.77909	1.09025e-09	2.13898e-08	Up	cyclin-related protein putative expressed
Os05g0405000	43.5	60.22	65.02	144.17	173.8	260.77	56.2467	192.913	1.77811	1.73763e-11	4.63002e-10	Up	expressed protein
Os02g0225900	1.08	0.86	0.72	2.05	3	4.06	0.886667	3.03667	1.77602	2.35983e-06	2.30204e-05	Up	cytochrome P450 72A1 putative expressed
Os04g0370600	2.13	2.7	2.61	9.76	8.64	7.08	2.48	8.49333	1.77599	1.21035e-14	5.04808e-13	Up	expressed protein
Os06g0601600	0.28	0.24	0.54	1.52	1.12	0.99	0.353333	1.21	1.77591	6.44016e-05	0.000428379	Up	enoyl-acyl-carrier-protein reductase NADH chloroplast precursor expressed
Os01g0165100	1.43	1.16	0.85	3.07	4.01	4.67	1.14667	3.91667	1.77218	1.12111e-07	1.48006e-06	Up	expressed protein
MSTRG.23820	0.29	0.24	0.17	1.35	0.4	0.64	0.233333	0.796667	1.77158	0.00784076	0.0268716	Up	protein kinase domain containing protein expressed
Os06g0134400	2.77	3.27	3.82	10.7	11.8	11.16	3.28667	11.22	1.77138	6.75284e-19	4.37606e-17	Up	ANTH FENTH domain containing protein putative expressed
Os01g0186900	1.9	2.5	4.74	5.36	6.06	19.76	3.04667	10.3933	1.77035	0.000421252	0.00223818	Up	expressed protein
Os05g0506000	30.8	29.81	26.24	84.32	91.94	119.94	28.95	98.7333	1.76997	1.29257e-16	6.74755e-15	Up	cysteine synthase chloroplast Fchromoplast precursor putative expressed
Os08g0137800	18.63	24.35	16.43	56.55	58.68	87.38	19.8033	67.5367	1.76993	1.28162e-10	2.96489e-09	Up	ribosome putative expressed
Os03g0745600	0.81	1.57	1.04	3.77	4.73	3.15	1.14	3.88333	1.76826	6.1522e-06	5.37611e-05	Up	expressed protein
Os02g0479100	0.31	0.2	0.38	0.75	1.42	0.86	0.296667	1.01	1.76744	0.0142932	0.0439921	Up	--
Os01g0786800	0.81	0.53	1.06	1.91	2.51	3.75	0.8	2.72333	1.7673	1.19025e-05	9.59286e-05	Up	expressed protein
Os10g0475900	2.21	2.54	2.68	8.14	9.43	7.72	2.47667	8.43	1.76713	2.27665e-15	1.03316e-13	Up	hydrolase alpha Fbeta fold family domain containing protein expressed
Os01g0740651	0.35	0.32	0.43	0.97	1.4	1.37	0.366667	1.24667	1.76553	1.34743e-05	0.000107297	Up	E1-E2 ATPase domain containing protein expressed
Os07g0167500	3.1	5.02	5.09	12.4	14.73	17.74	4.40333	14.9567	1.76412	6.4147e-11	1.56202e-09	Up	expressed protein
Os10g0407400	7.53	9.5	5.59	25.79	31.15	19.87	7.54	25.6033	1.7637	3.7787e-09	6.62943e-08	Up	possible lysine decarboxylase domain containing protein expressed
Os08g0518900	2.8	2.97	2.2	20.7	3.57	2.79	2.65667	9.02	1.76351	0.00546279	0.0198572	Up	--
Os01g0674400	5.58	10.73	7.99	22.45	28.81	31.13	8.1	27.4633	1.76151	8.25721e-09	1.3577e-07	Up	basic helix-loop-helix domain containing protein expressed
[truncated: 5,340 more rows]
