# Supplementary material for: Local and Systemic Response to Heterogeneous Sulfate Resupply after Sulfur Deficiency in Rice
Source: Int J Mol Sci. 2022 May 31;23(11):6203. doi: 10.3390/ijms23116203 (PMC9181796; doi:10.3390/ijms23116203)
Supplement: Supplementary file 1 [file ijms-23-06203-s001.zip › Table S3.xlsx]

## Sheet: Up-regulated DEGs in shoots
Table S3. DEGs with expression recovered after sulfate resupply: Up-regulagted DEGs in shoots
Gene ID	CK_Sh_mean	S0_Sh_mean	SR_Sh_mean	log2 of S0/CK	U/D of S0/CK	log2 of SR/S0	U/D of SR/S0	Annotation
Os01g0696701	0.123333	0.76	0.22	2.62344	Up	-1.7885	Down	Hypothetical protein.
Os04g0203600	0.143333	0.62	0.206667	2.11289	Up	-1.58496	Down	Similar to cDNA clone:002-100-D12 full insert sequence.
Os07g0625500	0.0266667	7.42	0.373333	8.12024	Up	-4.31288	Down	Similar to Fimbriata-associated protein (Fragment).
Os08g0155550	0.0366667	0.666667	0.0866667	4.18442	Up	-2.94342	Down	Hypothetical protein.
Os01g0723000	0.403333	26.66	0.733333	6.04656	Up	-5.18406	Down	Similar to Elongation factor EF-2 (Fragment).
Os06g0185500	1.11333	3.46	1.38	1.63589	Up	-1.3261	Down	Transferase family protein.
Os02g0259850	2.82333	8.73667	0.793333	1.62968	Up	-3.46108	Down	Hypothetical gene.
Os07g0131375	1.24667	2.73333	0.303333	1.13259	Up	-3.17169	Down	Protein kinase catalytic domain domain containing protein.
Os01g0280500	0.303333	20.2567	1.47	6.06135	Up	-3.78451	Down	Similar to Eukaryotic translation initiation factor 6 (eIF-6) (B4 integrin interactor) (CAB) (p27(BBP)) (B(2)GCN homolog).
Os02g0686100	0.296667	1.06	0.426667	1.83715	Up	-1.31288	Down	Similar to RING-H2 finger protein ATL1B.
Os01g0695800	7.26	29.1333	10.67	2.00463	Up	-1.44911	Down	Similar to MDR-like ABC transporter.
Os03g0724700	5.02667	13.1033	3.70667	1.38226	Up	-1.82174	Down	Similar to cDNA clone:002-104-C06 full insert sequence.
Os03g0348200	97.24	213.21	15.82	1.13265	Up	-3.75245	Down	Terpene synthase-like domain containing protein.
Os03g0259500	1.87333	155.877	3.91	6.37865	Up	-5.31709	Down	Similar to Ubiquitin.
Os12g0191601	0.386667	9.79667	1.13333	4.66313	Up	-3.11172	Down	Conserved hypothetical protein.
Os09g0452700	0.476667	185.007	2.56333	8.60038	Up	-6.17341	Down	Ubiquitin.
Os03g0650200	2.59667	7.71333	1.10667	1.57069	Up	-2.80113	Down	Similar to Cytochrome P450 CYP92C5.
Os12g0175400	3.56	7.92333	2.21	1.15423	Up	-1.84206	Down	Similar to OSMYB2.
Os09g0324400	0.346667	2.35	0.53	2.76104	Up	-2.1486	Down	Cyclin-like F-box domain containing protein.
Os09g0344400	0.0533333	2.44333	0.306667	5.51767	Up	-2.99411	Down	F-box domain cyclin-like domain containing protein.
Os02g0183900	0.333333	3.42	0.383333	3.35896	Up	-3.15732	Down	Similar to Isoleucine-tRNA ligase-like protein.
Os07g0124400	0.98	3.02667	1.44	1.62688	Up	-1.07166	Down	Hypothetical conserved gene.
Os10g0400100	17.28	68.0733	30.3167	1.97799	Up	-1.16698	Down	Methionyl-tRNA synthetase class Ia domain containing protein.
Os03g0283100	54.2167	265.567	103.473	2.29227	Up	-1.35982	Down	Similar to In2-1 protein.
Os07g0440900	0.0433333	1.85333	0.11	5.4185	Up	-4.07455	Down	Conserved hypothetical protein.
Os06g0697500	0.74	4.39667	1.53	2.57081	Up	-1.52288	Down	ATPase AAA-type core domain containing protein.
Os04g0372700	15.9467	35.83	9.85	1.16791	Up	-1.86297	Down	Similar to Quinone-oxidoreductase QR1 (Fragment).
Os01g0653500	0.0166667	0.72	0.11	5.43296	Up	-2.71049	Down	Conserved hypothetical protein.
Os01g0830900	0.623333	1.68	0.001	1.43039	Up	-10.7142	Down	Hypothetical conserved gene.
Os07g0605800	2.43667	31.7433	5.7	3.70347	Up	-2.47742	Down	Similar to STF-1 (Fragment).
MSTRG.28235	0.316667	2.54333	0.923333	3.00568	Up	-1.4618	Down	--
Os10g0154700	9.5	21.5033	6.78333	1.17856	Up	-1.66449	Down	Similar to Cyclophilin Dicyp-2.
Os03g0618300	26.8967	128.957	35.0333	2.26139	Up	-1.88009	Down	Isopenicillin N synthase family protein.
Os11g0298000	4.06333	9.03667	1.11667	1.15313	Up	-3.01659	Down	Similar to amino acid transporter.
Os07g0218200	0.14	12.6667	3.61667	6.49947	Up	-1.8083	Down	Similar to terpene synthase 7.
Os03g0198200	2.70333	6.73	1.43667	1.31587	Up	-2.22788	Down	Hypothetical protein.
Os07g0593400	2.05667	4.6	1.64	1.16133	Up	-1.48794	Down	Similar to golgi transport 1 protein B.
Os09g0127300	13.1667	37.7767	11.14	1.52061	Up	-1.76175	Down	NAD(P)-binding domain containing protein.
Os02g0300700	29.99	73.4633	33.01	1.29254	Up	-1.15412	Down	Similar to Eukaryotic translation initiation factor 1A (EIF-1A) (EIF-4C).
Os05g0107900	3.21667	7.72667	2.80333	1.26428	Up	-1.4627	Down	Similar to Protein DEHYDRATION-INDUCED 19 homolog 6.
Os04g0204100	0.21	14.46	0.456667	6.10553	Up	-4.98478	Down	Similar to H0825G02.3 protein.
Os03g0145600	0.326667	2.10333	0.626667	2.68679	Up	-1.74691	Down	WD40/YVTN repeat-like domain containing protein.
Os09g0483300	0.173333	9.91667	0.866667	5.83823	Up	-3.51631	Down	EF hand domain containing protein.
Os05g0515900	0.816667	3.11667	1.51667	1.93218	Up	-1.0391	Down	Similar to heat- and acid-stable phosphoprotein.
Os02g0772000	0.21	0.816667	0.226667	1.95936	Up	-1.84918	Down	Similar to global transcription factor group.
MSTRG.19551	0.156667	3.56667	0.213333	4.50881	Up	-4.0634	Down	--
Os04g0578550	4.04	12.32	0.883333	1.60858	Up	-3.8019	Down	Hypothetical conserved gene.
Os07g0131001	2.4	6.32667	1.19667	1.39841	Up	-2.40242	Down	Hypothetical protein.
Os10g0400500	0.14	3.11	0.283333	4.47342	Up	-3.45634	Down	Similar to Pyridoxal-dependent decarboxylase conserved domain containing protein expressed.
Os11g0117400	19.57	58.4167	6.47333	1.57774	Up	-3.1738	Down	Similar to WRKY DNA binding domain containing protein expressed.
MSTRG.21891	0.0233333	2.77667	0.443333	6.89482	Up	-2.64689	Down	--
Os02g0467600	0.54	2.34667	1	2.11958	Up	-1.23061	Down	Similar to Cinnamate 4-hydroxylase CYP73.
Os04g0206450	0.403333	2.40333	0.48	2.57499	Up	-2.32393	Down	Similar to cDNA clone:002-100-D12 full insert sequence.
Os04g0399800	0.15	0.716667	0.0266667	2.25634	Up	-4.74819	Down	Similar to Ethylene-responsive transcription factor 12 (Ethylene-responsive element binding factor 12) (EREBP-12) (AtERF12).
Os08g0288500	12.58	35.5233	15.5133	1.49764	Up	-1.19526	Down	Similar to G-patch domain containing protein.
Os02g0129800	10.0733	84.3433	21.2067	3.06573	Up	-1.99176	Down	Conserved hypothetical protein.
Os01g0106400	65.2167	659.197	161.883	3.3374	Up	-2.02575	Down	Similar to Isoflavone reductase homolog IRL (EC 1.3.1.-).
Os05g0276500	0.403333	2.16333	0.723333	2.42321	Up	-1.58052	Down	Expansin Os-EXPA3.
Os06g0592500	17.36	95.9033	1.96333	2.46581	Up	-5.6102	Down	Similar to Ethylene-responsive transcriptional coactivator.
Os02g0179600	1.19667	48.9567	3.17333	5.35441	Up	-3.94743	Down	Uncharacterized conserved protein UCP015417 vWA domain containing protein.
Os04g0204150	0.166667	8.61	0.243333	5.69098	Up	-5.14501	Down	Hypothetical protein.
Os03g0757600	2.67	17.0433	3.9	2.6743	Up	-2.12766	Down	UDP-glucuronosyl/UDP-glucosyltransferase family protein.
Os03g0797300	3.87667	15.6333	1.22333	2.01174	Up	-3.67574	Down	Similar to benzoxazinless1.
Os08g0168000	7.1	15.4867	1.84	1.12514	Up	-3.07325	Down	Similar to Sesquiterpene synthase.
Os05g0282900	0.123333	0.816667	0.19	2.72718	Up	-2.10375	Down	Conserved hypothetical protein.
Os01g0136200	14.1967	37.9967	3.84	1.42032	Up	-3.30669	Down	16.9 kDa class I heat shock protein 1.
Os09g0483200	0.193333	68.18	0.633333	8.46211	Up	-6.75024	Down	Similar to Ubiquitin/ribosomal fusion protein (Fragment).
Os09g0324300	0.113333	0.593333	0.0433333	2.38827	Up	-3.77529	Down	Cyclin-like F-box domain containing protein.
Os03g0195475	3.67	7.38333	3.55333	1.00849	Up	-1.0551	Down	Hypothetical protein.
MSTRG.5654	0.001	0.35	0.001	8.45121	Up	-8.45121	Down	--
Os09g0309700	9.23	26.24	8.84333	1.50737	Up	-1.56911	Down	Ethylene response factor Transcription factor Negative regulation of ethylene biosynthesis Drought tolerance
Os07g0251301	0.001	0.953333	0.001	9.89684	Up	-9.89684	Down	Similar to Ribosomal phosphoprotein P0.
Os01g0155000	0.623333	4.49	2.08667	2.84864	Up	-1.10552	Down	Alpha/beta hydrolase fold-3 domain containing protein.
Os11g0540600	0.27	0.656667	0.0933333	1.2822	Up	-2.8147	Down	Protein of unknown function DUF247 plant family protein.
Os12g0639400	0.0233333	0.41	0.143333	4.13516	Up	-1.51625	Down	ATPase AAA-type core domain containing protein.
Os01g0820000	2.65667	5.85667	0.001	1.14046	Up	-12.5159	Down	Similar to Cinnamate-4-hydroxylase.
Os01g0627800	2.38333	8.17667	0.5	1.77853	Up	-4.03151	Down	Similar to Cytochrome P450 monooxygenase CYP72A5 (Fragment).
Os04g0627900	1.06667	16.7333	1	3.97154	Up	-4.06465	Down	Translation initiation factor SUI1 domain containing protein.
Os01g0954000	53.96	110.327	3.52667	1.03182	Up	-4.96733	Down	NADPH-dependent FMN reductase family protein.
Os04g0516600	35.7633	84.21	18.46	1.23551	Up	-2.18959	Down	Pyridoxal phosphate-dependent transferase major region subdomain 1 domain containing protein.
Os07g0448200	0.806667	2.33	0.05	1.53029	Up	-5.54226	Down	Similar to cDNA clone:J023132K03 full insert sequence.
Os03g0190400	0.806667	1.81667	0.503333	1.17125	Up	-1.85171	Down	Hypothetical gene.
Os09g0483400	12.37	1263.47	101.377	6.6744	Up	-3.63959	Down	Similar to Ubiquitin/ribosomal fusion protein (Fragment).
Os01g0947000	1.94333	30.87	7.97333	3.9896	Up	-1.95295	Down	Similar to Beta-1 3-glucanase precursor.
Os01g0714800	0.146667	2.55333	0.253333	4.12177	Up	-3.33327	Down	WRKY transcription factor 26.
Os09g0498500	10.2667	58.7167	19.5933	2.5158	Up	-1.58341	Down	NAD-binding site containing protein.
Os05g0395400	3.38667	45.04	6.39333	3.73327	Up	-2.81657	Down	Hypothetical protein.
Os01g0373700	0.756667	4.28333	1.50667	2.501	Up	-1.50737	Down	Conserved hypothetical protein.
Os03g0797500	5.68667	55.9633	6.36667	3.29883	Up	-3.13587	Down	Similar to Indole-3-glycerol phosphate lyase (Fragment).
Os01g0803300	2.13667	5.31333	0.846667	1.31426	Up	-2.64975	Down	Protein of unknown function DUF6 transmembrane domain containing protein.
Os07g0625600	0.113333	18.3767	0.496667	7.34116	Up	-5.20945	Down	Fimbriata-associated protein (Fragment).
Os03g0807600	0.001	0.353333	0.00666667	8.46489	Up	-5.72792	Down	Similar to Cyclopropane-fatty-acyl-phospholipid synthase family protein expressed.
Os07g0509800	117.833	309.13	65.7133	1.39147	Up	-2.23396	Down	Similar to adenosine 5'-phosphosulfate reductase 2.
Os05g0588900	2.59667	13.0433	1.61	2.32858	Up	-3.01818	Down	Similar to mitochondrial chaperone BCS1.
Os02g0102300	10.84	56.48	19.6067	2.38138	Up	-1.5264	Down	Arsenate reductase Sulfurtransferase/rhodanese-like protein Regulation of arsenic accumulation
MSTRG.13241	1.15	2.48667	0.656667	1.11258	Up	-1.92098	Down	--
Os04g0206650	0.001	0.503333	0.0133333	8.97537	Up	-5.2384	Down	Hypothetical protein.
Os04g0659200	0.0933333	3.13	0.333333	5.06763	Up	-3.23113	Down	Hypothetical protein.
Os10g0386300	0.796667	68.64	3.35333	6.42893	Up	-4.35538	Down	Hypothetical protein.
MSTRG.13384	0.403333	1.21667	0.573333	1.59289	Up	-1.08549	Down	--
Os10g0506200	0.823333	6.08667	1.77333	2.8861	Up	-1.77919	Down	Similar to Valyl-tRNA synthetase.
Os02g0720400	0.186667	5.44667	0.663333	4.86684	Up	-3.03757	Down	Protein of unknown function DUF506 plant domain containing protein.
MSTRG.17585	0.36	1.75	0.843333	2.28129	Up	-1.05318	Down	--
Os06g0141700	2.03	4.07	1.97667	1.00355	Up	-1.04196	Down	Similar to Early nodulin.
Os04g0206600	0.396667	18.1433	0.613333	5.51537	Up	-4.88662	Down	UDP-glucuronosyl/UDP-glucosyltransferase family protein.
Os09g0545100	1.08667	2.97333	1.16	1.45217	Up	-1.35796	Down	Hypothetical conserved gene.
Os10g0344000	3.67333	8.33667	2.50333	1.18238	Up	-1.73562	Down	Similar to transparent testa 12 protein.
MSTRG.34718	1.38	3.67	0.393333	1.41111	Up	-3.22196	Down	--
MSTRG.19004	0.03	0.346667	0.156667	3.53051	Up	-1.14585	Down	--
Os04g0206500	1.54667	10.8433	1.28667	2.80957	Up	-3.0751	Down	UDP-glucuronosyl/UDP-glucosyltransferase family protein.
Os03g0338000	6.56333	44.75	13.3333	2.76939	Up	-1.74685	Down	Similar to alanine--glyoxylate aminotransferase 2.
Os01g0793300	6.17	22.6667	6.44	1.87723	Up	-1.81544	Down	Di-copper centre-containing domain containing protein.
Os02g0491300	0.01	0.573333	0.04	5.8413	Up	-3.8413	Down	Secretory fasciclin glycoprotein Regulation of anther development and pollen formation
Os05g0186300	35.2867	71.3133	8.58667	1.01505	Up	-3.054	Down	Similar to NADP-malic enzyme.
Os05g0127500	6.55	15.4333	5.16333	1.23648	Up	-1.57968	Down	Similar to Leucoanthocyanidin dioxygenase-like protein.
Os07g0543100	6.92	27.2533	1.08	1.97759	Up	-4.65733	Down	Similar to Beta-amylase (EC 3.2.1.2).
Os04g0521100	1.37	4.33667	0.31	1.66241	Up	-3.80625	Down	Major intrinsic protein family protein.
Os12g0111800	0.273333	1.07667	0.46	1.97784	Up	-1.22687	Down	Similar to Class III peroxidase 136.
Os02g0259900	5.81	15.3333	1.38	1.40006	Up	-3.47393	Down	Conserved hypothetical protein.
Os09g0394600	4.08	8.5	1.76	1.05889	Up	-2.27189	Down	Endonuclease/exonuclease/phosphatase domain containing protein.
Os07g0656600	1.81333	5.87	1.10333	1.69472	Up	-2.41149	Down	Uncharacterised conserved protein UCP022348 domain containing protein.
Os01g0510200	10.3133	199.68	7.52667	4.27511	Up	-4.72953	Down	Conserved hypothetical protein.
Os12g0518200	2.44667	6.33667	1.54333	1.37291	Up	-2.03767	Down	Similar to Integral membrane protein DUF6 containing protein.
Os09g0342000	0.15	3.06	0.32	4.3505	Up	-3.25739	Down	Cyclin-like F-box domain containing protein.
Os03g0724600	1.12667	9.83333	2.08	3.12562	Up	-2.2411	Down	Conserved hypothetical protein.
Os04g0631600	6.34667	14.1767	6.08333	1.15945	Up	-1.22058	Down	Basic helix-loop-helix dimerisation region bHLH domain containing protein.
Os03g0165900	0.99	27.1467	10.7733	4.7772	Up	-1.33331	Down	Tetratricopeptide-like helical domain containing protein.
Os04g0111250	1.90333	4.14	1.15	1.1211	Up	-1.848	Down	Conserved hypothetical protein.
Os04g0341500	2.99333	7.85667	3.81333	1.39216	Up	-1.04286	Down	Similar to OSIGBa0159H11-OSIGBa0137A07.8 protein.
Os02g0513100	5.77333	23.2667	3.47	2.01079	Up	-2.74526	Down	Similar to MtN3 protein precursor.
Os10g0133166	0.106667	0.52	0.0433333	2.2854	Up	-3.58496	Down	Conserved hypothetical protein.
Os05g0206100	0.236667	2.32333	0.456667	3.29527	Up	-2.34698	Down	Conserved hypothetical protein.
Os03g0277300	5.68	16.0267	2.01333	1.49651	Up	-2.99282	Down	Heat shock protein 70.
Os12g0162800	1.97333	5.32667	2.55667	1.4326	Up	-1.05897	Down	Domain of unknown function DUF1618 domain containing protein.
Os02g0575000	7.41667	25.01	7.88667	1.75366	Up	-1.66502	Down	Conserved hypothetical protein.
Os11g0160400	0.916667	3.95667	0.993333	2.10982	Up	-1.99394	Down	Conserved hypothetical protein.
Os06g0701700	6.46667	17.45	6.22	1.43213	Up	-1.48824	Down	Ion transporter Na+/K+ symport
Os07g0523400	9.60333	26.02	8.43667	1.43801	Up	-1.62488	Down	Glucose-6-phosphate/phosphate-translocator precursor.
Os02g0162600	6.96667	15.7467	4.93667	1.17651	Up	-1.67344	Down	Conserved hypothetical protein.
Os03g0197175	51.96	116.15	40.7833	1.16052	Up	-1.50994	Down	Hypothetical gene.
Os10g0380800	0.02	0.83	0.0933333	5.37504	Up	-3.15265	Down	Similar to Tryptophan decarboxylase.
Os05g0580000	76.5867	397.057	142.97	2.37418	Up	-1.47363	Down	Similar to ADP-glucose pyrophosphorylase (EC 2.7.7.27) (Fragment).
Os02g0184700	0.06	0.54	0.25	3.16993	Up	-1.11103	Down	Cytochrome P450 family protein.
Os01g0586800	0.001	0.973333	0.126667	9.92679	Up	-2.9419	Down	Similar to WRKY transcription factor 5 (Fragment).
Os11g0670900	30.0767	89.1767	35.9533	1.56802	Up	-1.31054	Down	Conserved hypothetical protein.
Os01g0136050	0.516667	2.43333	0.436667	2.23563	Up	-2.47833	Down	Similar to 16.9 kDa heat shock protein.
Os11g0181200	0.426667	2.30333	0.186667	2.43254	Up	-3.62519	Down	Hypothetical protein.
Os08g0374701	0.303333	1.71333	0.596667	2.49783	Up	-1.52181	Down	Similar to Protein kinase domain containing protein expressed.
Os06g0216300	1.91	14.9033	3.44	2.96399	Up	-2.11515	Down	Similar to 12-oxophytodienoic acid reductase.
Os01g0692050	0.183333	1.51333	0.683333	3.04519	Up	-1.14707	Down	Conserved hypothetical protein.
Os03g0245800	0.253333	1.17	0.223333	2.2074	Up	-2.38924	Down	Similar to Heat shock protein 26.
Os03g0296200	0.546667	1.90667	0.306667	1.80232	Up	-2.63631	Down	Conserved hypothetical protein.
Os01g0825800	6.95333	47.6533	21.8767	2.7768	Up	-1.12318	Down	Amino acid transporter transmembrane domain containing protein.
Os04g0522500	2.16	4.49	1.18333	1.05568	Up	-1.92386	Down	2OG-Fe(II) oxygenase domain containing protein.
Os03g0230300	5.91333	14.1433	6.22333	1.25808	Up	-1.18436	Down	Homologue of SRO (similar to RCD one) Regulation of stomatal closure Abiotic stress response
Os02g0744200	18.2733	45.0533	19.42	1.30189	Up	-1.21409	Down	Alpha-expansin OsEXPA5.
Os05g0519700	16.0967	34.6933	1.24667	1.1079	Up	-4.79851	Down	Heat shock protein Long-term acquired thermotolerance
Os05g0528500	0.616667	2	0.863333	1.69744	Up	-1.21201	Down	Conserved hypothetical protein.
Os01g0696600	2.62	9.49333	4.36667	1.85735	Up	-1.12038	Down	Similar to MDR-like ABC transporter.
Os01g0136100	4.23	15.9467	5.89333	1.91453	Up	-1.4361	Down	16.9 kDa class I heat shock protein 1.
Os11g0112400	2.57333	5.20667	2.34333	1.01672	Up	-1.1518	Down	Peroxidase (EC 1.11.1.7).
Os01g0734000	1.72333	4.42	2.16	1.35884	Up	-1.03302	Down	Similar to WRKY DNA binding protein.
Os03g0195800	0.273333	2.41667	1.11	3.14429	Up	-1.12246	Down	Similar to Sulfate transporter (Fragment).
Os08g0169100	0.0233333	0.133333	0.06	2.51457	Up	-1.152	Down	Hypothetical gene.
Os02g0149600	0.56	1.41333	0.653333	1.3356	Up	-1.11321	Down	Zinc finger C2H2-like domain containing protein.
Os08g0141400	11.7667	25.4867	9.43	1.11504	Up	-1.43441	Down	Similar to mRNA clone: RTFL01-03-I20.
Os11g0533400	0.586667	2.00333	0.07	1.77179	Up	-4.8389	Down	Conserved hypothetical protein.
MSTRG.14414	0.123333	0.596667	0.176667	2.27436	Up	-1.7559	Down	PREDICTED: calmodulin-like protein 5 [Oryza sativa Japonica Group]
Os10g0379100	0.176667	3.27	1.00667	4.21019	Up	-1.6997	Down	Transferase family protein.
Os01g0307686	2.98333	23.1	11.4267	2.9529	Up	-1.01549	Down	Similar to embryonic abundant protein-like.
Os06g0704000	0.256667	0.703333	0.213333	1.45431	Up	-1.7211	Down	Protein of unknown function DUF659 domain containing protein.
Os04g0578000	1.72	5.81667	2.85333	1.75778	Up	-1.02754	Down	ACC synthase Ethylene biosynthesis
Os03g0197200	16.2967	34.6067	11.9033	1.08647	Up	-1.53968	Down	Similar to Sorbitol transporter.
Os03g0201500	0.736667	3.08667	0.776667	2.06697	Up	-1.99068	Down	Glycoside hydrolase family 10 protein.
Os01g0773800	0.413333	2.16333	0.223333	2.38788	Up	-3.27599	Down	Hypothetical conserved gene.
Os04g0445100	1.68333	4.13667	0.256667	1.29715	Up	-4.0105	Down	Similar to 22.7 kDa class IV heat shock protein precursor.
Os05g0573300	17.6367	37.47	12.2567	1.08716	Up	-1.61217	Down	Similar to CTP synthase 1 (EC 6.3.4.2) (UTP--ammonia ligase 1) (CTP synthetase 1).
Os01g0172100	12.3667	34.5667	15.5167	1.48292	Up	-1.15556	Down	Similar to Triose phosphate/phosphate translocator non-green plastid chloroplast precursor (CTPT).
MSTRG.15138	4.48	10.1267	3.39667	1.17659	Up	-1.57597	Down	lysM domain containing protein [Zea mays]
Os07g0564500	2.52	9.69	4.04333	1.94307	Up	-1.26095	Down	Pyridine nucleotide-disulphide oxidoreductase NAD-binding region domain containing protein.
Os10g0323500	0.623333	1.27	0.533333	1.02675	Up	-1.25172	Down	Similar to Beta-glucosidase.
Os04g0107900	4.01333	9.99333	0.783333	1.31616	Up	-3.67327	Down	Similar to Heat shock protein 82.
Os07g0523600	46.6733	149.697	43.1067	1.68137	Up	-1.79606	Down	Similar to Glucose-6-phosphate/phosphate-translocator precursor.
Os03g0739700	10.6167	33.9667	8.15333	1.67779	Up	-2.05866	Down	Uncharacterised protein family UPF0114 domain containing protein.
MSTRG.12165	0.001	0.32	0.001	8.32193	Up	-8.32193	Down	--
MSTRG.30983	0.001	0.68	0.0233333	9.40939	Up	-4.86507	Down	--
Os02g0134000	8.68667	22.0933	9.22667	1.34674	Up	-1.25973	Down	Similar to bifunctional coenzyme A synthase.
Os03g0153900	6.14	23.79	8.83333	1.95404	Up	-1.42933	Down	Aromatic-ring hydroxylase family protein.
Os12g0478200	7.11667	15.9433	6.41667	1.16368	Up	-1.31306	Down	Hypothetical protein.
Os01g0609300	11.5133	65.5367	26.49	2.509	Up	-1.30685	Down	Similar to Pleiotropic drug resistance protein 3.
Os04g0359700	0.001	0.23	0.0266667	7.84549	Up	-3.10852	Down	Hypothetical conserved gene.
Os02g0649300	12.1	30.6567	1.01	1.34119	Up	-4.92377	Down	HD-ZIP I protein Transcription activator Stress response Panicle development
Os07g0587300	0.633333	3.51667	1.24667	2.47317	Up	-1.49613	Down	Hypothetical conserved gene.
Os03g0231600	15.19	32.3333	14.9133	1.0899	Up	-1.11642	Down	Similar to Branched-chain-amino-acid aminotransferase 3 chloroplast precursor (EC 2.6.1.42) (Atbcat-3).
Os04g0108101	4.03333	9.44333	0.31	1.22732	Up	-4.92896	Down	Hypothetical protein.
Os08g0298700	1.26333	3.18	1.53	1.33179	Up	-1.0555	Down	Similar to male sterility protein 2.
Os03g0192550	0.706667	2.14333	0.563333	1.60075	Up	-1.9278	Down	Hypothetical gene.
Os10g0517500	66.98	136.197	66.0767	1.02389	Up	-1.04348	Down	Cys/Met metabolism pyridoxal phosphate-dependent enzyme domain containing protein.
MSTRG.4680	0.001	0.496667	0.001	8.95613	Up	-8.95613	Down	--
Os01g0712700	28.6833	57.6533	24.6167	1.00719	Up	-1.22777	Down	CMP/dCMP deaminase zinc-binding domain containing protein.
Os08g0335500	1.52	3.8	1.42	1.32193	Up	-1.42011	Down	Hypothetical conserved gene.
Os05g0527000	0.95	3.27667	0.96	1.78623	Up	-1.77112	Down	UDP-glucuronosyl/UDP-glucosyltransferase family protein.
Os06g0697200	1.7	3.79667	1.65667	1.1592	Up	-1.19645	Down	DEAD-box protein abstrakt.
Os04g0569100	3.13	6.44667	2.59667	1.04239	Up	-1.31189	Down	Similar to OCL1 homeobox protein.
Os03g0723400	4.95333	12.3333	1.67333	1.31609	Up	-2.88177	Down	Similar to UFG2.
Os05g0542500	5.22	18.13	2.12	1.79626	Up	-3.09624	Down	Similar to Isoform 2 of Late embryogenesis abundant protein group 3.
MSTRG.22720	0.193333	0.98	0.45	2.34169	Up	-1.12286	Down	--
Os02g0530300	9.87	20.0667	8.69	1.02368	Up	-1.20737	Down	Zinc finger AN1-type domain containing protein.
Os02g0611250	0.42	1.49	0.423333	1.82685	Up	-1.81545	Down	Hypothetical gene.
Os03g0168100	0.843333	2.79	0.496667	1.72609	Up	-2.48992	Down	Late embryogenesis abundant protein repeat containing protein.
Os12g0457500	0.001	0.113333	0.0133333	6.82443	Up	-3.08746	Down	Conserved hypothetical protein.
Os07g0523965	52.86	171.13	48.8067	1.69484	Up	-1.80994	Down	Similar to Glucose-6-phosphate/phosphate-translocator precursor.
Os03g0109000	7.32	17.2333	7.74333	1.23529	Up	-1.15418	Down	Similar to NAC domain protein.
Os04g0482300	27.0967	88.15	33.5333	1.70185	Up	-1.39436	Down	Kelch related domain containing protein.
Os09g0109600	4.31	10.33	3.17333	1.26108	Up	-1.70277	Down	Small peptide Drought tolerance
Os05g0584900	0.0166667	0.48	0.183333	4.848	Up	-1.38857	Down	Conserved hypothetical protein.
Os05g0194500	2.67667	7.26667	2.92	1.44086	Up	-1.31533	Down	Similar to ANAC075.
Os04g0136700	29.9133	65.8467	24.5467	1.13832	Up	-1.42358	Down	Cystathionine beta-synthase core domain containing protein.
Os01g0615050	6.59	15.67	6.31667	1.24965	Up	-1.31077	Down	Proteinase inhibitor I13 potato inhibitor I family protein.

## Sheet: Up-regulated DEGs in roots
Table S3. DEGs with expression recovered after sulfate resupply: Up-regulagted DEGs in roots
Gene ID	CK_R_mean	S0_R_mean	SR_R_mean	log2 of S0/CK	U/D of S0/CK	log2 of SR/S0	U/D of SR/S0	Annotation
Os10g0122500	0.001	0.4	0.001	8.64386	Up	-8.64386	Down	Hypothetical conserved gene.
Os07g0625500	0.07	99.8167	32.29	10.4777	Up	-1.62819	Down	Similar to Fimbriata-associated protein (Fragment).
Os12g0617400	2.66333	13.2167	2.01667	2.31105	Up	-2.71231	Down	Viviparous-14.
Os04g0476400	2.14	5.38667	2.54667	1.33178	Up	-1.08078	Down	Similar to OSIGBa0106G07.13 protein.
Os01g0101900	0.193333	44.74	1.59	7.85433	Up	-4.81447	Down	Similar to OSIGBa0075F02.3 protein.
Os04g0614700	30.27	130.983	44.9633	2.11342	Up	-1.54256	Down	Similar to OSIGBa0126B18.8 protein.
Os01g0214500	12.95	60.3333	26.6867	2.22	Up	-1.17684	Down	Conserved hypothetical protein.
Os03g0259500	1.45333	1118.35	369.613	9.58779	Up	-1.59728	Down	Similar to Ubiquitin.
Os03g0663900	0.001	4	0.726667	11.9658	Up	-2.46063	Down	Hypothetical conserved gene.
Os12g0191601	2.15	284.97	99.9467	7.05033	Up	-1.51158	Down	Conserved hypothetical protein.
Os02g0183900	0.25	39.1633	11.31	7.29143	Up	-1.7919	Down	Similar to Isoleucine-tRNA ligase-like protein.
Os02g0206700	1.48667	7.65	2.27333	2.36338	Up	-1.75065	Down	UDP-glucuronosyl/UDP-glucosyltransferase family protein.
Os10g0400100	33.9133	246.217	115.673	2.86	Up	-1.08987	Down	Methionyl-tRNA synthetase class Ia domain containing protein.
MSTRG.5506	0.001	1.38	0.256667	10.4305	Up	-2.4267	Down	Zinc knuckle family protein [Oryza sativa Japonica Group]
Os02g0554200	0.676667	5.28	1.2	2.96402	Up	-2.1375	Down	Conserved hypothetical protein.
Os03g0283100	57.1633	335.293	109.55	2.55226	Up	-1.61383	Down	Similar to In2-1 protein.
Os12g0614800	0.976667	8.05	2.21667	3.04305	Up	-1.8606	Down	Similar to cDNA clone:002-112-E04 full insert sequence.
Os03g0685300	19.9233	49.3833	21.1133	1.30957	Up	-1.22587	Down	Glutamine amidotransferase class-I domain containing protein.
Os01g0605000	13.74	58.38	18.1767	2.08709	Up	-1.68339	Down	Hypothetical protein.
MSTRG.1642	0.17	3.42667	1.35	4.3332	Up	-1.34385	Down	--
Os01g0653500	0.001	0.25	0.001	7.96578	Up	-7.96578	Down	Conserved hypothetical protein.
Os04g0435500	6.93	31.0167	12.4033	2.16212	Up	-1.32232	Down	Glutathione S-transferase C-terminal-like domain containing protein.
MSTRG.7640	0.123333	1.04667	0.123333	3.08517	Up	-3.08517	Down	--
Os11g0490300	4.31	13.0733	4.96	1.60087	Up	-1.39822	Down	Hypothetical conserved gene.
Os12g0512800	0.983333	6.02333	1.55667	2.61481	Up	-1.9521	Down	Cytochrome P450 71E1 (EC 1.14.13.68) (4-hydroxyphenylacetaldehyde oxime monooxygenase).
Os03g0618300	44.1233	179.247	54.6333	2.02233	Up	-1.71409	Down	Isopenicillin N synthase family protein.
Os12g0168700	7.26667	16.0533	4.79333	1.14351	Up	-1.74377	Down	AMP-dependent synthetase and ligase domain containing protein.
Os11g0668300	5.76333	15.7567	5.72333	1.45099	Up	-1.46103	Down	Hypothetical conserved gene.
Os01g0909150	0.223333	1.64667	0.206667	2.88228	Up	-2.99417	Down	Conserved hypothetical protein.
Os04g0614650	12.3333	60.1967	17.6567	2.28712	Up	-1.76947	Down	Similar to OSIGBa0126B18.8 protein.
Os04g0203450	0.1	2.24667	0.513333	4.48971	Up	-2.12982	Down	Hypothetical protein.
Os03g0145600	0.77	9.44	4.13667	3.61586	Up	-1.19032	Down	WD40/YVTN repeat-like domain containing protein.
Os01g0876200	0.33	1.91	0.486667	2.53303	Up	-1.97257	Down	Similar to Chloride channel protein CLC-c (AtCLC-c).
Os09g0483300	0.23	58.1167	28.5767	7.98117	Up	-1.02411	Down	EF hand domain containing protein.
Os09g0465400	2.28	5.31667	2.10667	1.22149	Up	-1.33556	Down	Adenine nucleotide translocator 1 domain containing protein.
Os03g0127500	1.06667	10.67	2.68667	3.32238	Up	-1.98967	Down	bZIP transcription factor bZIP-1 domain containing protein.
Os01g0696600	12.53	116.427	46.75	3.21596	Up	-1.31638	Down	Similar to MDR-like ABC transporter.
Os04g0689900	5.23333	10.9567	1.96	1.06601	Up	-2.48288	Down	Similar to Pathogenesis-related protein 5 precursor (PR-5).
Os01g0647000	66.76	146.83	31.2667	1.13709	Up	-2.23145	Down	Cyclin-like F-box domain containing protein.
Os04g0636500	0.7	1.89	0.576667	1.43296	Up	-1.71258	Down	BTB domain containing protein.
Os08g0461100	1.48333	2.98333	1.10667	1.00808	Up	-1.4307	Down	Hypothetical conserved gene.
Os02g0772000	0.133333	3.75	0.87	4.81378	Up	-2.1078	Down	Similar to global transcription factor group.
MSTRG.19551	0.24	14.6967	3.34333	5.93631	Up	-2.13613	Down	--
Os03g0195800	16.7	283.547	5.17333	4.08567	Up	-5.64047	Down	Similar to Sulfate transporter (Fragment).
Os12g0257000	31.84	184.863	72.78	2.53755	Up	-1.34485	Down	Serine carboxypeptidase I precursor (EC 3.4.16.5) (Carboxypeptidase C).
Os08g0486500	0.156667	1.63	0.393333	3.3791	Up	-2.05105	Down	Conserved hypothetical protein.
Os12g0150700	0.79	48.0633	18.4933	5.92694	Up	-1.37793	Down	Similar to Ser/Thr protein phosphatase family protein expressed.
Os01g0716800	3.33	23.5567	2.85333	2.82254	Up	-3.04542	Down	Endonuclease/exonuclease/phosphatase domain containing protein.
Os05g0463000	0.916667	14.41	1.68333	3.97453	Up	-3.09768	Down	Similar to Receptor protein kinase-like protein.
Os04g0206450	0.23	15.3633	4.84	6.06171	Up	-1.66641	Down	Similar to cDNA clone:002-100-D12 full insert sequence.
Os02g0129800	18.1967	75.45	14.5033	2.05185	Up	-2.37914	Down	Conserved hypothetical protein.
Os10g0477600	19.02	38.6667	17.0967	1.02357	Up	-1.17738	Down	Similar to NAM / CUC2-like protein.
Os06g0539066	4.89667	10.04	3.91667	1.03589	Up	-1.35806	Down	Conserved hypothetical protein.
Os01g0173900	13.87	51.77	20.1433	1.90015	Up	-1.36181	Down	Similar to MRP-like ABC transporter.
Os11g0136101	0.0133333	0.54	0.143333	5.33985	Up	-1.91359	Down	Hypothetical protein.
Os09g0483200	0.593333	2823.57	686.91	12.2164	Up	-2.03933	Down	Similar to Ubiquitin/ribosomal fusion protein (Fragment).
Os03g0646200	7.03667	14.8767	6.33	1.08009	Up	-1.23277	Down	Peptidase C12 ubiquitin carboxyl-terminal hydrolase 1 domain containing protein.
Os12g0244800	0.49	1.04333	0.443333	1.09035	Up	-1.23474	Down	Conserved hypothetical protein.
Os01g0155000	31.5033	460.613	218.987	3.86998	Up	-1.07271	Down	Alpha/beta hydrolase fold-3 domain containing protein.
Os01g0628000	1.69	9.64667	1.77	2.51301	Up	-2.44628	Down	Cytochrome P450 family protein.
Os09g0466300	0.89	7.97667	2.36333	3.16391	Up	-1.75496	Down	Similar to FIP1.
Os03g0645900	1.97667	10.58	1.11	2.4202	Up	-3.25271	Down	Carotenoid oxygenase family protein.
Os01g0627800	0.353333	814.67	164.16	11.171	Up	-2.31111	Down	Similar to Cytochrome P450 monooxygenase CYP72A5 (Fragment).
Os08g0156000	8.51667	56.1567	9.68333	2.7211	Up	-2.53588	Down	Conserved hypothetical protein.
Os07g0625600	0.173333	222.827	62.6	10.3282	Up	-1.83169	Down	Fimbriata-associated protein (Fragment).
Os07g0671901	2.53667	6.14333	0.886667	1.27609	Up	-2.79256	Down	Hypothetical gene.
Os06g0652100	0.0166667	1.06667	0.356667	6	Up	-1.58046	Down	Uncharacterized conserved protein UCP015417 vWA domain containing protein.
Os08g0155900	19.2633	128.677	28.7967	2.73982	Up	-2.15978	Down	Similar to Pathogen-induced defense-responsive protein.
Os06g0661200	1.34	2.84333	0.126667	1.08535	Up	-4.48847	Down	Similar to B-box zinc finger family protein.
Os04g0570000	1.95667	6.41	1.46	1.71193	Up	-2.13436	Down	Cytochrome P450 family protein.
Os02g0649300	3.45	9.55333	0.14	1.46941	Up	-6.09251	Down	HD-ZIP I protein Transcription activator Stress response Panicle development
Os12g0143800	1.52333	10.98	3.96333	2.84957	Up	-1.47009	Down	Meiosis-specific DNA recombinase Synaptonemal complex (SC) assembly
Os05g0588900	2.91333	66.1067	18.5367	4.50405	Up	-1.83441	Down	Similar to mitochondrial chaperone BCS1.
Os04g0206650	0.001	7.51333	1.91667	12.8752	Up	-1.97085	Down	Hypothetical protein.
Os11g0135400	28.1333	78.87	38.4467	1.4872	Up	-1.03662	Down	60S acidic ribosomal protein P0.
Os01g0891400	2.23333	5.54	2.44667	1.31069	Up	-1.17907	Down	S1 RNA binding domain containing protein.
Os10g0386300	0.45	190.263	40.6933	8.72386	Up	-2.22513	Down	Hypothetical protein.
Os12g0191400	0.95	7.44	2.68667	2.9693	Up	-1.46949	Down	Conserved hypothetical protein.
Os01g0627900	1.51667	6.28333	2.46667	2.05063	Up	-1.34897	Down	Similar to Cytochrome P450.
Os10g0344500	1.44667	210.44	42.1667	7.18453	Up	-2.31923	Down	Similar to cDNA clone:001-128-E01 full insert sequence.
Os03g0373500	1.48333	5.38	1.32333	1.85876	Up	-2.02343	Down	Hypothetical protein.
MSTRG.4680	0.0333333	32.06	7.24667	9.90959	Up	-2.14538	Down	--
Os11g0210201	10.9233	202.917	99.4533	4.2154	Up	-1.0288	Down	Conserved hypothetical protein.
Os01g0715500	1.25333	4.16	1.35667	1.73081	Up	-1.61652	Down	Similar to voltage-dependent anion channel protein2.
MSTRG.13384	0.48	14.5467	1.95	4.92151	Up	-2.89914	Down	--
Os09g0483150	0.001	2.92	0.783333	11.5118	Up	-1.89827	Down	Hypothetical gene.
Os10g0506200	0.206667	89.3367	33.7167	8.7558	Up	-1.40579	Down	Similar to Valyl-tRNA synthetase.
Os02g0720400	1.84	17.6967	2.36667	3.2657	Up	-2.90255	Down	Protein of unknown function DUF506 plant domain containing protein.
Os01g0672100	15.5967	122.15	58.38	2.96934	Up	-1.06511	Down	No apical meristem (NAM) protein domain containing protein.
Os04g0569100	2.15667	16	3.72667	2.8912	Up	-2.10211	Down	Similar to OCL1 homeobox protein.
Os12g0191500	2.01667	10.7067	4.28333	2.40846	Up	-1.3217	Down	Similar to Peroxidase 43 precursor (EC 1.11.1.7) (Atperox P43).
Os07g0448400	69.8767	267.32	36.57	1.93569	Up	-2.86984	Down	Similar to Aquaporin PIP2-5.
MSTRG.34257	0.66	3.50667	0.51	2.40956	Up	-2.78153	Down	fibroin-like protein [Oryza sativa Japonica Group]
Os01g0753150	2.30333	5.62	1.56	1.28685	Up	-1.84902	Down	Optic atrophy 3-like domain containing protein.
Os02g0582800	19.93	139.967	53.9133	2.81207	Up	-1.37637	Down	Conserved hypothetical protein.
Os06g0553100	2.99667	6.90333	2.16333	1.20393	Up	-1.67404	Down	Similar to Heat stress transcription factor C-2b.
Os12g0147200	2.95333	7.62667	1.09333	1.36871	Up	-2.80232	Down	Conserved hypothetical protein.
Os01g0816100	15.0433	103.113	48.47	2.77703	Up	-1.08907	Down	Similar to NAC domain protein.
Os01g0510200	26.8233	3438.12	1278.06	7.00199	Up	-1.42766	Down	Conserved hypothetical protein.
Os04g0206350	0.001	1.42667	0.39	10.4784	Up	-1.8711	Down	Hypothetical protein.
Os09g0342000	0.74	91.5267	32.03	6.95052	Up	-1.51477	Down	Cyclin-like F-box domain containing protein.
Os12g0133050	46.2967	97.9033	48.0667	1.08045	Up	-1.02632	Down	Similar to 60S acidic ribosomal protein P0.
Os12g0248600	2.40667	12.5533	2.76333	2.38296	Up	-2.18359	Down	Hypothetical protein.
Os02g0580600	0.896667	3.35333	0.9	1.90295	Up	-1.8976	Down	Similar to Dimethylaniline monooxygenase-like protein.
Os04g0477025	0.763333	1.62	0.506667	1.08561	Up	-1.67688	Down	Hypothetical gene.
Os04g0203600	0.166667	5.25667	1.46	4.97911	Up	-1.84818	Down	Similar to cDNA clone:002-100-D12 full insert sequence.
Os08g0156100	1.94	23.7667	2.89333	3.61481	Up	-3.03814	Down	Conserved hypothetical protein.
Os08g0467300	2.96333	8.14667	3.12667	1.45899	Up	-1.38158	Down	Clathrin adaptor phosphoinositide-binding GAT-like domain containing protein.
MSTRG.29377	0.123333	0.97	0.0633333	2.97542	Up	-3.93695	Down	--
Os01g0280500	1.77	260.817	66.5567	7.20314	Up	-1.97038	Down	Similar to Eukaryotic translation initiation factor 6 (eIF-6) (B4 integrin interactor) (CAB) (p27(BBP)) (B(2)GCN homolog).
Os01g0695800	11.8133	121.173	21.9333	3.35858	Up	-2.46588	Down	Similar to MDR-like ABC transporter.
Os05g0506000	28.95	98.7333	36.3033	1.76997	Up	-1.44344	Down	Similar to MS5-like protein (Fragment).
Os12g0617250	2.37	14.8433	1.73	2.64686	Up	-3.10097	Down	Hypothetical gene.
Os09g0520700	133.577	363.74	160.72	1.44524	Up	-1.17836	Down	Similar to RNA helicase.
Os03g0724700	21.7567	150.1	60.4933	2.78639	Up	-1.31108	Down	Similar to cDNA clone:002-104-C06 full insert sequence.
Os06g0553001	7.65	21.3567	4.64	1.48115	Up	-2.20249	Down	Conserved hypothetical protein.
Os04g0588500	4.33	56.6133	16.1733	3.7087	Up	-1.80752	Down	Hypothetical gene.
Os03g0705800	10.0533	21.1033	10.44	1.0698	Up	-1.01535	Down	Protein of unknown function DUF3049 domain containing protein.
Os09g0452700	1.4	4559.73	1081.78	11.6693	Up	-2.07555	Down	Ubiquitin.
Os09g0324400	4.25	217.39	36.8233	5.67668	Up	-2.56159	Down	Cyclin-like F-box domain containing protein.
Os08g0523200	0.37	8.49333	1.48667	4.52073	Up	-2.51425	Down	Similar to MAB1.
Os01g0360150	0.26	3.72333	0.86	3.84001	Up	-2.11419	Down	Hypothetical protein.
Os04g0551700	1.28	2.64333	1.19667	1.04621	Up	-1.14334	Down	PAP fibrillin family protein.
Os09g0344400	0.89	132.243	48.2167	7.21517	Up	-1.45559	Down	F-box domain cyclin-like domain containing protein.
Os12g0578600	0.913333	2.74667	1.26	1.58847	Up	-1.12426	Down	Zinc finger C2H2-type domain containing protein.
Os03g0445700	7.82	33.4433	16.1167	2.09648	Up	-1.05317	Down	LATERAL ORGAN BOUNDARIES DOMAIN (LBD) protein Transcriptional activator Regulation of heading date and yield
Os01g0867300	33.06	72.6533	24.35	1.13594	Up	-1.57711	Down	bZIP transcription factor Abiotic stress response ABA signaling Suppressor of floral transition upon drought stress
Os04g0488800	1.96333	5.6	2.44	1.51212	Up	-1.19855	Down	Conserved hypothetical protein.
Os06g0217700	0.656667	2.15667	0.6	1.71557	Up	-1.84577	Down	Conserved hypothetical protein.
Os07g0440900	0.07	5.31333	2.01333	6.24612	Up	-1.40003	Down	Conserved hypothetical protein.
MSTRG.24093	0.03	7.44667	0.393333	7.95549	Up	-4.24277	Down	--
Os06g0697500	4.19667	221.577	86.3167	5.72242	Up	-1.36009	Down	ATPase AAA-type core domain containing protein.
Os05g0588800	4.62333	21.56	8.05667	2.22135	Up	-1.4201	Down	Similar to Yarrowia lipolytica chromosome D of strain CLIB99 of Yarrowia lipolytica.
Os07g0605800	5.04667	313.563	125.897	5.95728	Up	-1.31652	Down	Similar to STF-1 (Fragment).
MSTRG.26543	0.353333	3.46333	1.02333	3.29306	Up	-1.75889	Down	PREDICTED: actin cytoskeleton-regulatory complex protein PAN1-like [Oryza sativa Japonica Group]
Os08g0457000	1.2	2.49	1	1.05311	Up	-1.31615	Down	Conserved hypothetical protein.
MSTRG.28997	0.0833333	2.79	0.856667	5.06523	Up	-1.70346	Down	gag-pol polyprotein [Hordeum vulgare]
Os01g0686700	0.88	3.61	0.633333	2.03642	Up	-2.51096	Down	Similar to protein binding protein.
Os01g0719000	7.58333	29.1	4.82667	1.94012	Up	-2.59192	Down	Protein of unknown function DUF581 family protein.
Os03g0198200	4.93333	15.0567	4.87333	1.60977	Up	-1.62742	Down	Hypothetical protein.
Os02g0300700	30.76	409.88	193.943	3.73607	Up	-1.07957	Down	Similar to Eukaryotic translation initiation factor 1A (EIF-1A) (EIF-4C).
Os01g0694000	0.323333	1.39	0.25	2.10399	Up	-2.47508	Down	Protein kinase core domain containing protein.
Os04g0204100	0.21	289.417	84.49	10.4285	Up	-1.7763	Down	Similar to H0825G02.3 protein.
Os12g0443700	96.5933	423.277	158.977	2.13161	Up	-1.41279	Down	Similar to Glu-prolyl-tRNA aminoacyl synthetase (Fragment).
Os09g0499400	0.153333	15.3333	6.07	6.64386	Up	-1.3369	Down	Domain of unknown function DUF2828 domain containing protein.
MSTRG.12172	0.0366667	3.43667	0.15	6.5504	Up	-4.51798	Down	early embryogenesis protein [Oryza sativa Japonica Group]
Os01g0605100	32.4	159.83	45.5367	2.30247	Up	-1.81144	Down	Similar to BCS1 protein-like protein.
Os10g0509401	62.78	245.82	49.9067	1.96923	Up	-2.3003	Down	Conserved hypothetical protein.
Os01g0842600	0.83	4.82	1.83333	2.53785	Up	-1.39456	Down	Similar to AAA-metalloprotease FtsH.
Os11g0617700	0.0266667	0.77	0.07	4.85175	Up	-3.45943	Down	Protein of unknown function DUF594 domain containing protein.
Os06g0252300	13.3767	148.77	72.1167	3.47529	Up	-1.04468	Down	Hypothetical conserved gene.
Os01g0638000	4.08333	47.5067	11.72	3.54031	Up	-2.01916	Down	UDP-glucuronosyl/UDP-glucosyltransferase family protein.
Os01g0695900	0.196667	3.29333	1.24667	4.06572	Up	-1.40147	Down	OSMYB4.
MSTRG.21464	0.236667	7.02667	1.17667	4.89191	Up	-2.57813	Down	--
Os08g0272800	0.133333	3.9	1.53667	4.87036	Up	-1.34367	Down	Hypothetical gene.
Os08g0288500	8.49	67.9167	30.16	2.99993	Up	-1.17113	Down	Similar to G-patch domain containing protein.
Os01g0106400	84.1167	798.577	296.057	3.24697	Up	-1.43156	Down	Similar to Isoflavone reductase homolog IRL (EC 1.3.1.-).
Os09g0421300	0.293333	1.32333	0.606667	2.17356	Up	-1.1252	Down	Phospholipase D lambda.
Os01g0268600	0.333333	6.44	1.41667	4.27202	Up	-2.18456	Down	Glycoside hydrolase family 31 protein.
Os08g0295300	65.5667	261.037	104.567	1.99322	Up	-1.31983	Down	Similar to Threonyl-tRNA synthetase cytoplasmic (EC 6.1.1.3) (Threonine--tRNA ligase) (ThrRS).
Os01g0137250	0.156667	1.09	0.22	2.79856	Up	-2.30875	Down	Similar to Stress-induced receptor-like kinase 2.
Os05g0473300	0.353333	7.57	2.58	4.42119	Up	-1.55292	Down	Hypothetical conserved gene.
Os01g0370900	0.736667	5.44667	0.58	2.88629	Up	-3.23125	Down	Similar to Glutathione transferase.
Os04g0500600	0.04	2.6	0.753333	6.02237	Up	-1.78715	Down	Hypothetical protein.
MSTRG.5655	0.001	1.06	0.18	10.0498	Up	-2.558	Down	--
Os02g0179600	2.87667	781.977	249.5	8.08658	Up	-1.64809	Down	Uncharacterized conserved protein UCP015417 vWA domain containing protein.
Os06g0201000	2.02667	9.57333	2.66667	2.23991	Up	-1.84398	Down	Conserved hypothetical protein.
Os04g0204150	0.326667	135.527	48.95	8.69654	Up	-1.4692	Down	Hypothetical protein.
Os01g0172100	9.56667	29.3033	12.6233	1.61498	Up	-1.21497	Down	Similar to Triose phosphate/phosphate translocator non-green plastid chloroplast precursor (CTPT).
Os10g0527400	28.2367	144.687	53.4067	2.35729	Up	-1.43784	Down	Similar to Tau class GST protein 3.
Os09g0450600	0.643333	7.15667	1.24333	3.47565	Up	-2.52507	Down	Similar to Protein HVA22.
Os01g0158500	7.47667	44.2067	14.7067	2.5638	Up	-1.58779	Down	Similar to arginyl-tRNA synthetase.
Os09g0324300	0.293333	59.54	13.2133	7.66517	Up	-2.17186	Down	Cyclin-like F-box domain containing protein.
Os01g0850900	265.453	766.863	105.9	1.53051	Up	-2.85627	Down	SOUL haem-binding protein domain containing protein.
Os01g0934800	37.1267	98.4067	29.5267	1.4063	Up	-1.73674	Down	Alpha/beta hydrolase fold-1 domain containing protein.
Os01g0138500	5.51	26.9867	0.826667	2.29212	Up	-5.0288	Down	Protein of unknown function DUF789 family protein.
MSTRG.5654	0.001	9.48333	1.56333	13.2112	Up	-2.60077	Down	--
Os07g0409500	0.246667	2.64333	0.446667	3.42172	Up	-2.56509	Down	BTB/POZ fold domain containing protein.
Os09g0309700	9.4	82.9367	19.9133	3.14128	Up	-2.05828	Down	Ethylene response factor Transcription factor Negative regulation of ethylene biosynthesis Drought tolerance
Os07g0251301	0.001	3.00333	0.24	11.5523	Up	-3.64546	Down	Similar to Ribosomal phosphoprotein P0.
MSTRG.20433	1.57	27.3967	8.27667	4.12516	Up	-1.72688	Down	integrase core domain containing protein [Oryza sativa Japonica Group]
Os01g0746400	0.18	3.46	0.266667	4.2647	Up	-3.69766	Down	Carotenoid cleavage dioxygenase 8 Control of lateral bud outgrowth Regulation of tillering Strigolactones biosynthesis
Os11g0135900	3.22333	55.9933	13.8233	4.11863	Up	-2.01815	Down	Major facilitator superfamily protein.
Os03g0151500	4.61333	11.4333	3.10333	1.30936	Up	-1.88136	Down	Conserved hypothetical protein.
Os05g0244500	20.3	56.8633	14.4567	1.48602	Up	-1.97576	Down	Glycoside hydrolase family 5 protein.
Os04g0627900	1.01	682.813	243.353	9.40099	Up	-1.48844	Down	Translation initiation factor SUI1 domain containing protein.
Os01g0954000	16.7467	61.8133	21.3633	1.88404	Up	-1.53278	Down	NADPH-dependent FMN reductase family protein.
Os04g0172100	1.37667	5.77333	1.98333	2.06823	Up	-1.54148	Down	Conserved hypothetical protein.
Os07g0637300	29.6967	559.983	203.123	4.23701	Up	-1.46303	Down	Similar to Pyruvate dehydrogenase kinase.
Os10g0343951	0.293333	18.2733	5.95333	5.96105	Up	-1.61797	Down	Hypothetical conserved gene.
Os01g0363900	11.6167	128.113	42.2133	3.46315	Up	-1.60165	Down	Similar to HASTY.
Os11g0648400	0.776667	2.31	0.863333	1.57253	Up	-1.4199	Down	Protein of unknown function DUF3615 domain containing protein.
MSTRG.21184	0.19	1.02667	0.273333	2.4339	Up	-1.90923	Down	--
Os01g0959750	6.8	244.547	90.0333	5.16843	Up	-1.44158	Down	Conserved hypothetical protein.
Os10g0401000	13.25	41.0267	20.3167	1.63057	Up	-1.0139	Down	Conserved hypothetical protein.
MSTRG.6288	0.476667	1.95333	0.95	2.03489	Up	-1.03994	Down	--
Os02g0102300	36.82	241.68	106.65	2.71454	Up	-1.18021	Down	Arsenate reductase Sulfurtransferase/rhodanese-like protein Regulation of arsenic accumulation
Os08g0528000	0.11	0.54	0.193333	2.29546	Up	-1.48187	Down	Peptidase C19 ubiquitin carboxyl-terminal hydrolase 2 family protein.
Os02g0258800	20.05	58.0633	20.4533	1.53403	Up	-1.50529	Down	Conserved hypothetical protein.
Os06g0659400	0.12	0.486667	0.11	2.0199	Up	-2.14543	Down	Protein of unknown function DUF231 plant domain containing protein.
Os01g0627967	4.40667	33.3233	9.27	2.91877	Up	-1.84589	Down	Hypothetical protein.
Os01g0682700	0.176667	1.57333	0.193333	3.15472	Up	-3.02466	Down	Conserved hypothetical protein.
Os04g0373400	24.5667	489.007	155.87	4.31508	Up	-1.64951	Down	Similar to MATE efflux family protein expressed.
Os07g0580300	0.396667	4.87	1.96	3.61792	Up	-1.31307	Down	Hypothetical conserved gene.
Os04g0678400	38.33	149.243	51.1333	1.96112	Up	-1.54533	Down	Zinc finger Dof-type domain containing protein.
MSTRG.23133	13.3467	48.0367	23.9533	1.84766	Up	-1.00391	Down	--
Os04g0206600	0.316667	271.393	77.9667	9.7432	Up	-1.79946	Down	UDP-glucuronosyl/UDP-glucosyltransferase family protein.
Os08g0148267	3.48	10.76	4.74333	1.62852	Up	-1.1817	Down	Hypothetical conserved gene.
Os09g0545100	2.53	7.64667	2.50333	1.59569	Up	-1.61098	Down	Hypothetical conserved gene.
Os10g0344000	2.23333	122.773	48.4133	5.78065	Up	-1.34252	Down	Similar to transparent testa 12 protein.
Os04g0206500	0.613333	145.153	32.1833	7.88669	Up	-2.17319	Down	UDP-glucuronosyl/UDP-glucosyltransferase family protein.
Os03g0712800	2.18	12.4867	4.71333	2.51799	Up	-1.40557	Down	Cytosolic glutamine synthetase
Os02g0669100	240.38	1012.02	187.157	2.07384	Up	-2.43491	Down	Dehydrin family protein.
Os07g0448600	102.52	419.203	58.5167	2.03174	Up	-2.84073	Down	Hypothetical protein.
Os04g0635000	4.06667	25.6033	5.91	2.65441	Up	-2.1151	Down	Similar to H0315F07.10 protein.
Os01g0547600	0.436667	2.92333	0.02	2.74301	Up	-7.19147	Down	High-affinity nitrate transporter Nitrate transport Auxin signaling
Os10g0521000	5.86667	24.2067	4.60333	2.04479	Up	-2.39465	Down	Similar to TRE1 protein (Fragment).
Os10g0542700	0.266667	1.17	0.27	2.1334	Up	-2.11548	Down	Protein of unknown function DUF241 plant family protein.
Os08g0156066	0.001	1.04	0.0333333	10.0224	Up	-4.96347	Down	Hypothetical gene.
Os01g0323950	0.001	1.45	0.001	10.5018	Up	-10.5018	Down	Similar to Glycine-rich protein 2b.
Os02g0491300	0.001	6.66	0.786667	12.7013	Up	-3.0817	Down	Secretory fasciclin glycoprotein Regulation of anther development and pollen formation
Os09g0400600	4.98667	11.2167	4.40333	1.1695	Up	-1.34898	Down	Hypothetical protein.
Os05g0544600	0.533333	6.73667	1.32333	3.65893	Up	-2.34786	Down	Hypothetical conserved gene.
Os10g0509600	10.74	57.2167	5.88667	2.41344	Up	-3.28091	Down	Conserved hypothetical protein.
Os04g0206300	0.001	3	0.51	11.5507	Up	-2.55639	Down	Similar to OSIGBa0147O06.5 protein.
Os04g0376600	1.83667	3.87	1.58667	1.07524	Up	-1.28633	Down	Similar to ER lumen protein retaining receptor.
MSTRG.17311	1.05667	2.28667	0.413333	1.11373	Up	-2.46787	Down	--
Os03g0724600	1.63667	47.7433	16.7933	4.86647	Up	-1.50741	Down	Conserved hypothetical protein.
Os06g0600700	2.99	16.5867	5.18	2.47181	Up	-1.679	Down	Agenet domain containing protein.
Os12g0614851	0.62	11.0567	2.84667	4.1565	Up	-1.95757	Down	Serine/threonine protein kinase domain containing protein.
Os03g0165900	0.576667	22.9067	5.06333	5.31189	Up	-2.17761	Down	Tetratricopeptide-like helical domain containing protein.
Os04g0588350	0.25	2.66667	0.643333	3.41504	Up	-2.0514	Down	Similar to nucleotidyltransferase family protein.
Os01g0697250	0.001	0.556667	0.001	9.12067	Up	-9.12067	Down	Similar to OSIGBa0132O24.2 protein.
Os05g0182600	3.29333	10.7133	4.47333	1.70179	Up	-1.25999	Down	Similar to SSRP1 protein.
Os02g0714700	2.89667	6.41	2.67333	1.14593	Up	-1.26168	Down	Hypothetical protein.
Os04g0541700	30.36	68.08	14.95	1.16506	Up	-2.18709	Down	Similar to Homeobox-leucine zipper protein HOX22.
Os02g0327000	125.997	374.317	185.627	1.57087	Up	-1.01186	Down	C2 domain containing protein.
Os01g0723000	1.17667	425.537	162.523	8.49843	Up	-1.38864	Down	Similar to Elongation factor EF-2 (Fragment).
Os05g0206100	3.50333	26.2667	5.97667	2.90643	Up	-2.13582	Down	Conserved hypothetical protein.
Os02g0575000	28.95	380.39	134.803	3.71584	Up	-1.49662	Down	Conserved hypothetical protein.
Os05g0578100	6.50333	25.4333	9.02	1.96747	Up	-1.49552	Down	Protein of unknown function DUF1645 family protein.
Os01g0944100	1.35	33.0333	14.3367	4.61289	Up	-1.20421	Down	Conserved hypothetical protein.
MSTRG.1338	1.12	3.1	1.43667	1.46877	Up	-1.10954	Down	--
Os09g0555550	2.62333	7.72667	2.24333	1.55845	Up	-1.7842	Down	Hypothetical protein.
MSTRG.8627	0.403333	2.90333	0.343333	2.84767	Up	-3.08003	Down	--
Os02g0775300	0.94	16.78	7.98	4.15794	Up	-1.07228	Down	Conserved hypothetical protein.
Os03g0242300	40.6533	110.963	27.4333	1.44864	Up	-2.01608	Down	Hypothetical protein.
MSTRG.9240	0.001	1.95667	0.376667	10.9342	Up	-2.37704	Down	PREDICTED: WAT1-related protein At5g64700-like isoform X3 [Oryza sativa Japonica Group]
Os06g0216300	12.31	49.6533	17.0767	2.01206	Up	-1.53986	Down	Similar to 12-oxophytodienoic acid reductase.
MSTRG.30824	0.326667	3.07667	1.22333	3.23548	Up	-1.33055	Down	--
Os06g0610600	0.933333	9.22667	3.93	3.30535	Up	-1.23128	Down	Conserved hypothetical protein.
Os07g0687900	1.17333	7.81667	3.3	2.73594	Up	-1.24409	Down	WSI76 protein induced by water stress.
Os11g0582300	3.11333	9.46667	4.45	1.6044	Up	-1.08905	Down	Similar to root hair defective 3 GTP-binding (RHD3) family protein.
Os11g0593100	0.243333	1.26667	0.546667	2.38003	Up	-1.2123	Down	Protein of unknown function DUF295 family protein.
Os02g0222100	14.4133	35.2567	14.8333	1.29049	Up	-1.24905	Down	Similar to Cysteine synthase (EC 4.2.99.8).
Os04g0372700	3.06667	13.8967	6.41667	2.18	Up	-1.11484	Down	Similar to Quinone-oxidoreductase QR1 (Fragment).
Os03g0296200	0.146667	1.57667	0.276667	3.42626	Up	-2.51066	Down	Conserved hypothetical protein.
Os09g0415050	0.11	5.16	1.11333	5.5518	Up	-2.21249	Down	Hypothetical gene.
Os03g0250000	25.78	93.0733	19.3967	1.85212	Up	-2.26256	Down	Conserved hypothetical protein.
Os04g0593800	0.196667	0.766667	0.246667	1.96285	Up	-1.63604	Down	Ubiquitin-conjugating enzyme/RWD-like domain containing protein.
Os03g0120800	0.03	1.04	0.433333	5.11548	Up	-1.26303	Down	Conserved hypothetical protein.
Os02g0732600	0.02	0.873333	0.123333	5.44846	Up	-2.82397	Down	Similar to Typical P-type R2R3 Myb protein (Fragment).
Os04g0633800	0.0566667	0.4	0.0733333	2.81943	Up	-2.44746	Down	Protein kinase catalytic domain domain containing protein.
MSTRG.12266	0.266667	0.573333	0.196667	1.10434	Up	-1.54362	Down	PREDICTED: disease resistance protein RGA2 isoform X2 [Oryza sativa Japonica Group]
Os11g0147200	0.44	1.23667	0.54	1.49088	Up	-1.19543	Down	Hypothetical conserved gene.
Os05g0107900	2.98667	19.2067	9.47667	2.685	Up	-1.01916	Down	Similar to Protein DEHYDRATION-INDUCED 19 homolog 6.
MSTRG.10058	0.643333	6.73667	2.79	3.3884	Up	-1.27177	Down	--
Os05g0519700	1.21	4	1.65333	1.72499	Up	-1.27462	Down	Heat shock protein Long-term acquired thermotolerance
Os08g0534300	2.40667	19.97	5.58333	3.05273	Up	-1.83864	Down	Similar to calmodulin binding protein.
Os05g0515900	0.89	12.2767	4.68667	3.78597	Up	-1.38928	Down	Similar to heat- and acid-stable phosphoprotein.
Os02g0149600	0.52	6.66333	3.11667	3.67966	Up	-1.09624	Down	Zinc finger C2H2-like domain containing protein.
MSTRG.2513	0.453333	1.08667	0.54	1.26127	Up	-1.00888	Down	PREDICTED: WASH complex subunit CCDC53 homolog [Oryza sativa Japonica Group]
Os06g0146600	4.35333	280.023	136.497	6.00728	Up	-1.03668	Down	Hypothetical protein.
Os11g0533400	0.16	1.21	0.226667	2.91886	Up	-2.41636	Down	Conserved hypothetical protein.
MSTRG.3960	0.45	2.23	0.743333	2.30905	Up	-1.58496	Down	--
Os10g0325400	5.04333	22.2933	7.40667	2.14416	Up	-1.58972	Down	Remorin C-terminal domain containing protein.
Os08g0506000	1.34	3.86333	1.77667	1.52761	Up	-1.12067	Down	Ovarian tumour otubain domain containing protein.
Os05g0484800	11.57	38.5567	11.4833	1.73659	Up	-1.74744	Down	Protein of unknown function DUF567 family protein.
Os02g0686800	4.33667	30.23	10.69	2.80132	Up	-1.49972	Down	Protein of unknown function DUF581 family protein.
Os04g0603200	24.1267	54.2433	25.03	1.16882	Up	-1.11579	Down	Similar to C-terminal zinc-finger (Fragment).
MSTRG.17401	0.0633333	2.6	0.88	5.3594	Up	-1.56294	Down	--
Os03g0757600	2.76667	171.63	84.8933	5.95501	Up	-1.01558	Down	UDP-glucuronosyl/UDP-glucosyltransferase family protein.
Os05g0282900	0.56	2.66	1.02667	2.24793	Up	-1.37346	Down	Conserved hypothetical protein.
Os04g0690600	0.563333	2.35333	1.05	2.06264	Up	-1.16432	Down	Similar to Auxin response factor 13.
Os07g0122000	3.19667	6.50333	3	1.02461	Up	-1.11622	Down	Protein of unknown function DUF1719 Oryza sativa family protein.
MSTRG.5585	6.18333	17.2167	8.14667	1.47735	Up	-1.07952	Down	--
Os01g0893400	5.50333	33.5467	7.91667	2.60779	Up	-2.0832	Down	Zinc finger TAZ-type domain containing protein.
Os06g0239700	9.87	24.52	12.11	1.31284	Up	-1.01776	Down	Conserved hypothetical protein.
Os03g0287100	8.86667	32.3267	9.02	1.86626	Up	-1.84153	Down	Similar to Phosphatidylinositol transfer protein expressed.
Os01g0267300	2.82	12.5233	5.70667	2.15085	Up	-1.1339	Down	Hypothetical conserved gene.
Os06g0662550	0.393333	8.63	4.01333	4.45554	Up	-1.10456	Down	Conserved hypothetical protein.
MSTRG.2161	2.68667	11.44	4.76333	2.0902	Up	-1.26404	Down	--
Os08g0549950	1.21667	4.56667	2.28	1.90821	Up	-1.00211	Down	Hypothetical gene.
Os01g0314800	392.46	1559.65	502.32	1.9906	Up	-1.63454	Down	Late embryogenesis abundant protein 3 family protein.
MSTRG.17556	0.983333	4.68333	1.92667	2.25178	Up	-1.28143	Down	--
Os01g0730100	0.233333	5.56333	2.76333	4.57549	Up	-1.00954	Down	Cyclin-like F-box domain containing protein.
Os07g0113600	0.0433333	0.663333	0.12	3.93618	Up	-2.4667	Down	Hypothetical conserved gene.
Os05g0113300	1.62667	4.19	2.08	1.36503	Up	-1.01037	Down	Cation/H+ exchanger domain containing protein.
Os02g0612900	23.21	82.1767	36.9867	1.82398	Up	-1.15172	Down	Similar to Temperature stress-induced lipocalin.
MSTRG.25949	0.233333	1.4	0.176667	2.58496	Up	-2.98633	Down	EBNA1-like protein [Oryza sativa Japonica Group]
Os02g0723600	0.3	3.51	1.31	3.54844	Up	-1.4219	Down	Similar to RNA polymerase Rpb3/Rpb11 dimerisation domain containing protein expressed.
Os08g0412700	6.03667	33.2433	12.0667	2.46124	Up	-1.46204	Down	Protein of unknown function DUF1262 family protein.
Os05g0542500	3.16333	7.57667	1.66667	1.26012	Up	-2.1846	Down	Similar to Isoform 2 of Late embryogenesis abundant protein group 3.
Os02g0589500	1.24	4.40333	2.11333	1.82826	Up	-1.05908	Down	Hypothetical gene.
Os02g0316800	0.001	0.5	0.001	8.96578	Up	-8.96578	Down	Similar to MRNA binding protein precursor.
Os01g0533900	21.0067	57.8433	26.0133	1.4613	Up	-1.1529	Down	Similar to Multidrug resistance protein 1 homolog.
Os02g0627900	1.44333	3.00333	1.49	1.05716	Up	-1.01125	Down	Similar to cDNA clone:J013002N02 full insert sequence.
Os08g0178500	0.05	0.956667	0.0333333	4.25802	Up	-4.84298	Down	Similar to H0315F07.12 protein.
Os03g0719400	5.61333	12.9033	5.51	1.20081	Up	-1.22762	Down	Alpha/beta hydrolase fold-1 domain containing protein.
Os03g0776900	14.4	65.52	26.6867	2.18587	Up	-1.29582	Down	Similar to mitochondrial import inner membrane translocase subunit TIM14.
Os06g0104900	0.803333	40.69	7.31667	5.66253	Up	-2.47542	Down	Similar to L-lactate dehydrogenase B (EC 1.1.1.27) (LDH-B) (Fragment).
Os09g0109600	1.56333	9.77667	4.02667	2.64472	Up	-1.27976	Down	Small peptide Drought tolerance
Os03g0233300	1.05333	3.79333	1.51333	1.8485	Up	-1.32574	Down	LysM receptor-like kinase Arbuscular mycorrhizal (AM) symbiosis
Os01g0696800	0.736667	2.01333	0.66	1.4505	Up	-1.60905	Down	Peptidase A1 domain containing protein.
MSTRG.12640	1.06667	4.63667	1.55	2.11998	Up	-1.58082	Down	--
MSTRG.21899	0.0133333	1.75667	0.256667	7.04166	Up	-2.77487	Down	PREDICTED: cullin-3B-like [Oryza sativa Japonica Group]
Os01g0975900	155.26	383.05	145.347	1.30285	Up	-1.39803	Down	Similar to Tonoplast membrane integral protein ZmTIP1-2.
MSTRG.21458	1.37667	2.87333	1.37667	1.06155	Up	-1.06155	Down	--
Os06g0624900	40.7333	143.81	69.3033	1.81988	Up	-1.05317	Down	Similar to zinc-binding family protein.
Os11g0120300	11.3133	28.4033	13.9533	1.32804	Up	-1.02545	Down	Protein of unknown function DUF567 family protein.
Os01g0723025	0.001	5.45	2.03667	12.412	Up	-1.42005	Down	Hypothetical protein.
Os11g0181200	0.303333	2.18333	0.173333	2.84756	Up	-3.65491	Down	Hypothetical protein.
Os10g0505900	0.0566667	0.806667	0.08	3.8314	Up	-3.3339	Down	Conserved hypothetical protein.
Os02g0773800	2.03667	5.95667	2.58333	1.5483	Up	-1.20527	Down	Conserved hypothetical protein.
Os07g0684800	41.4233	91.7967	34.9033	1.148	Up	-1.39508	Down	Similar to NAM / CUC2-like protein.
Os09g0442400	2.27667	155.703	65.19	6.09573	Up	-1.25608	Down	t-snare domain containing protein.
Os04g0111301	0.001	0.56	0.001	9.12928	Up	-9.12928	Down	Similar to Clavata-like kinase.
Os07g0575600	2.67333	11.0533	5.23667	2.04777	Up	-1.07776	Down	Similar to Lectin receptor-type kinase.
MSTRG.19544	0.74	2.19	0.35	1.56533	Up	-2.6455	Down	--
Os08g0153750	2.80333	25.73	5.8	3.19824	Up	-2.14933	Down	Hypothetical protein.
Os06g0252800	0.001	0.403333	0.0566667	8.65583	Up	-2.8314	Down	Similar to STF-1 (Fragment).
Os03g0230300	11.2233	108.333	34.3833	3.2709	Up	-1.6557	Down	Homologue of SRO (similar to RCD one) Regulation of stomatal closure Abiotic stress response
MSTRG.24660	0.433333	4.77333	1.11333	3.46145	Up	-2.10011	Down	--
Os03g0179700	0.126667	4.8	0.973333	5.24393	Up	-2.30203	Down	Similar to OSIGBa0140O07.11 protein.
Os06g0147200	7.43	36.86	17.65	2.31062	Up	-1.06239	Down	Conserved hypothetical protein.
Os01g0919800	1.68333	4.25667	2.05667	1.3384	Up	-1.04942	Down	Similar to Efflux carrier of polar auxin transport.
Os10g0472400	20.3633	45.3333	22.2433	1.1546	Up	-1.0272	Down	Similar to Thioredoxin.
MSTRG.29034	4.02	9.45333	4.39	1.23363	Up	-1.1066	Down	--
MSTRG.4052	0.123333	1.65333	0.516667	3.74474	Up	-1.67807	Down	--
Os11g0112400	2.14333	8.32333	4.02	1.95731	Up	-1.04997	Down	Peroxidase (EC 1.11.1.7).
Os01g0292200	158.06	429.313	152.093	1.44156	Up	-1.49707	Down	Serine/threonine protein kinase domain containing protein.
Os03g0587600	0.001	0.163333	0.01	7.35168	Up	-4.02975	Down	Zinc finger CCHC-type domain containing protein.
Os05g0544750	0.183333	1.69333	0.24	3.20732	Up	-2.81876	Down	Hypothetical protein.
MSTRG.2280	0.0166667	2.34667	1.15333	7.1375	Up	-1.0248	Down	PREDICTED: F-box/FBD/LRR-repeat protein At5g22660 [Oryza sativa Japonica Group]
Os04g0616800	0.5	1.58333	0.486667	1.66297	Up	-1.70196	Down	Similar to H0525G02.13 protein.
Os05g0205400	1.85333	6.76667	1.94	1.86832	Up	-1.80239	Down	Conserved hypothetical protein.
Os08g0534950	2.20667	18.1767	5.24333	3.04215	Up	-1.79353	Down	Similar to calmodulin binding protein.
MSTRG.4641	0.523333	1.20333	0.463333	1.20123	Up	-1.37691	Down	--
Os05g0179100	32.1333	66.7733	27.29	1.0552	Up	-1.2909	Down	DVL family protein.
Os10g0509700	1.74333	4.89667	2.21667	1.48995	Up	-1.14341	Down	Hypothetical gene.
Os01g0192550	1.83667	8.33667	3.84333	2.18238	Up	-1.11711	Down	Conserved hypothetical protein.
Os04g0185600	0.136667	0.473333	0.0866667	1.7922	Up	-2.44931	Down	General substrate transporter domain containing protein.
Os02g0767600	1.4	4.17	1.39667	1.57462	Up	-1.57806	Down	Similar to RHC1A.
Os06g0206900	13.47	43.02	8.15	1.67526	Up	-2.40014	Down	Conserved hypothetical protein.
Os01g0716450	5.71333	16.6033	4.43667	1.53907	Up	-1.90392	Down	Hypothetical gene.
Os01g0713800	0.103333	1.61	0.553333	3.96168	Up	-1.54084	Down	Similar to RNA binding.
Os01g0855700	0.62	3.29	0.796667	2.40775	Up	-2.04604	Down	Hypothetical protein.
Os05g0102400	5.23667	18.68	5.77667	1.83477	Up	-1.69319	Down	Similar to exonuclease.
Os01g0885500	1.59667	5.92667	2.89333	1.89216	Up	-1.03449	Down	Hypothetical conserved gene.
Os02g0668500	21.1733	98.0933	40.58	2.21191	Up	-1.27339	Down	Cellular retinaldehyde-binding/triple function C-terminal domain containing protein.
Os03g0724800	0.08	0.5	0.136667	2.64386	Up	-1.87127	Down	Conserved hypothetical protein.
MSTRG.33621	0.116667	2.38	0.99	4.3505	Up	-1.26546	Down	--
MSTRG.5015	2.94	60.13	21.1533	4.3542	Up	-1.5072	Down	--
Os02g0638650	1.26333	11.47	2.33667	3.18256	Up	-2.29534	Down	Pathogenesis-related transcriptional factor and ERF domain containing protein.
Os01g0754800	4.34667	24.3333	9.24667	2.48495	Up	-1.39593	Down	Hypothetical protein.
Os01g0939500	2.49	25.87	10.2067	3.37706	Up	-1.34177	Down	Similar to Eukaryotic peptide chain release factor subunit 1-2 (eRF1-2) (Eukaryotic release factor 1-2) (Omnipotent suppressor protein 1 homolog 2) (SUP1 homolog 2).
MSTRG.1185	2.1	4.72667	2.11333	1.17043	Up	-1.1613	Down	--
Os03g0308850	2.92667	7.33333	3.19667	1.32521	Up	-1.1979	Down	Similar to Fip1 motif family protein expressed.
Os08g0234100	0.833333	1.83333	0.793333	1.1375	Up	-1.20847	Down	Conserved hypothetical protein.
Os05g0473401	0.116667	4.07333	1.40667	5.12575	Up	-1.53393	Down	Hypothetical conserved gene.
Os07g0472900	0.21	6.12333	3.01333	4.86586	Up	-1.02296	Down	Conserved hypothetical protein.
Os01g0878300	15.1833	62.0133	26.0133	2.03009	Up	-1.25333	Down	Protein kinase core domain containing protein.
MSTRG.9768	0.596667	5.29333	2.44	3.14918	Up	-1.1173	Down	--
MSTRG.27221	0.0433333	1.59	0.346667	5.19741	Up	-2.19741	Down	--
Os05g0395400	13.75	541.713	210.56	5.30003	Up	-1.3633	Down	Hypothetical protein.
Os11g0149300	2.57333	5.18	2.29333	1.00931	Up	-1.17551	Down	Hypothetical protein.
Os10g0571600	7.99333	58.6	22.98	2.87403	Up	-1.35052	Down	No apical meristem (NAM) protein domain containing protein.
Os07g0507500	0.14	0.68	0.28	2.28011	Up	-1.28011	Down	Protein of unknown function DUF1723 domain containing protein.
Os08g0377500	24.92	56.33	22.18	1.1766	Up	-1.34464	Down	Protein of unknown function DUF599 family protein.
Os06g0147250	4.52667	93.1733	40.8567	4.3634	Up	-1.18935	Down	Hypothetical conserved gene.
Os03g0820500	10.1267	28.3533	7.65333	1.48536	Up	-1.88936	Down	Actin depolymerizing factor Actin-binding protein Abiotic stress response
Os03g0841700	21.94	54.16	24.13	1.30366	Up	-1.1664	Down	Similar to Prohibitin.
Os11g0579900	0.426667	2.76667	1.24667	2.69697	Up	-1.15007	Down	Armadillo-like helical domain containing protein.
Os03g0806600	7.42333	28.8	13.6467	1.95593	Up	-1.07752	Down	Conserved hypothetical protein.
Os01g0117266	0.186667	1.09333	0.07	2.5502	Up	-3.96523	Down	Conserved hypothetical protein.
MSTRG.17585	0.316667	17.6933	8.19667	5.8041	Up	-1.1101	Down	--
MSTRG.5635	0.35	29.4667	13.37	6.39559	Up	-1.14008	Down	--
Os03g0191800	0.903333	3.57333	1.55333	1.98394	Up	-1.2019	Down	Conserved hypothetical protein.
Os06g0697200	0.15	4.28	1.82	4.83458	Up	-1.23367	Down	DEAD-box protein abstrakt.
Os03g0283200	3.27667	21.8533	7.42333	2.73755	Up	-1.55771	Down	Similar to IN2-1 protein.
Os05g0157600	1.59	11.5533	5.47	2.86121	Up	-1.0787	Down	Hypothetical conserved gene.
Os10g0506100	14.0733	66.7067	23.9233	2.24487	Up	-1.47941	Down	Heavy metal transport/detoxification protein domain containing protein.
MSTRG.19004	0.0333333	1.40333	0.53	5.39575	Up	-1.40479	Down	--
Os02g0305950	1.62667	10.4667	3.17333	2.68581	Up	-1.72173	Down	Similar to calmodulin binding protein.
Os06g0507300	0.286667	2.47667	0.713333	3.11095	Up	-1.79575	Down	Similar to GAMYB-binding protein.
Os01g0518400	0.136667	1.24333	0.563333	3.18548	Up	-1.14215	Down	Similar to Transposon protein.
Os04g0624800	0.456667	6	2.88667	3.71575	Up	-1.05556	Down	Aldo/keto reductase domain containing protein.
Os03g0723400	0.326667	4.62	0.616667	3.822	Up	-2.90533	Down	Similar to UFG2.
Os12g0127400	0.456667	2.58	1.19667	2.49816	Up	-1.10835	Down	Cyclin-like F-box domain containing protein.
Os11g0303800	0.816667	14.1433	6.81	4.11423	Up	-1.0544	Down	Hypothetical protein.
Os01g0843300	0.213333	0.653333	0.173333	1.61471	Up	-1.91427	Down	Similar to Mitochondrial Rho GTPase.
MSTRG.12687	0.0766667	0.766667	0.17	3.32193	Up	-2.17306	Down	--
Os01g0716500	6.40333	15.54	4.54333	1.27909	Up	-1.77416	Down	Methyltransferase type 12 domain containing protein.
Os05g0486300	0.0666667	0.59	0.24	3.14568	Up	-1.29768	Down	Similar to CCR4-NOT transcription complex subunit 2.
Os03g0168100	0.03	0.87	0.123333	4.85798	Up	-2.81845	Down	Late embryogenesis abundant protein repeat containing protein.
Os12g0120100	12.5	26.6667	11.1733	1.09311	Up	-1.25498	Down	Protein of unknown function DUF567 family protein.
Os06g0179200	7.18	17.1333	8.27667	1.25475	Up	-1.04968	Down	Similar to Nodulin-like protein.
Os01g0800500	4.99333	17.3167	7.84	1.79409	Up	-1.14324	Down	Purple acid phosphatase N-terminal domain containing protein.
MSTRG.21157	2.01667	4.61	2.00667	1.19279	Up	-1.19997	Down	--
Os01g0806300	2.87333	8.70333	3.64667	1.59884	Up	-1.25499	Down	Conserved hypothetical protein.
Os05g0531100	31.94	241.287	119.543	2.91731	Up	-1.01321	Down	Protein of unknown function DUF584 family protein.
Os08g0563400	2.20667	12.2433	6.07	2.47206	Up	-1.01223	Down	Similar to LOB domain protein 17.
Os01g0776500	2.14333	6.35667	2.95333	1.56841	Up	-1.10593	Down	Peptidase cysteine/serine trypsin-like domain containing protein.

## Sheet: Down-regulated DEGs in shoots
Table S3. DEGs with expression recovered after sulfate resupply: Down-regulagted DEGs in shoots
Gene ID	CK_R_mean	S0_R_mean	SR_R_mean	log2 of S0/CK	U/D of S0/CK	log2 of SR/S0	U/D of SR/S0	Annotation
Os08g0452500	5.27333	1.17	5.91333	-2.17221	Down	2.33746	Up	Auxin responsive SAUR protein family protein.
Os10g0396300	11.2567	3.91333	21.59	-1.52431	Down	2.46389	Up	Similar to MOB1.
Os02g0187700	18.3633	2.06333	22.69	-3.15378	Down	3.45901	Up	Similar to Myb-related protein B (B-Myb) (Myb-related protein 1) (XMYB1).
Os03g0748300	3.93667	1.84	55.32	-1.09727	Down	4.91002	Up	Aldose 1-epimerase family protein.
Os12g0446900	2.2	0.766667	2.10667	-1.52083	Down	1.45829	Up	Similar to bifunctional dihydrofolate reductase-thymidylate synthase.
Os11g0212900	0.92	0.446667	1.17667	-1.04244	Down	1.39744	Up	Serine/threonine protein kinase-related domain containing protein.
Os02g0772100	0.27	0.02	0.413333	-3.75489	Down	4.36923	Up	Conserved hypothetical protein.
Os06g0698748	29.5167	6.44667	46.4767	-2.1949	Down	2.84988	Up	Similar to cDNA clone:J023083M02 full insert sequence.
Os04g0659800	1.79	0.833333	3.00333	-1.10299	Down	1.8496	Up	Similar to OSIGBa0132E09-OSIGBa0108L24.20 protein.
Os05g0344200	122.293	46.6867	196.55	-1.38926	Down	2.07381	Up	Conserved hypothetical protein.
Os06g0582600	13.5367	4.42667	18.0433	-1.61258	Down	2.02717	Up	Similar to Cysteine proteinase.
Os02g0762200	4.81	2.02333	5.75	-1.2493	Down	1.50683	Up	Zinc finger CCHC-type domain containing protein.
Os09g0481800	10.7633	5.35667	18.5833	-1.00672	Down	1.7946	Up	Nitrogen-fixing NifU C-terminal domain containing protein.
Os11g0471300	0.273333	0.0666667	1.04	-2.03562	Down	3.96347	Up	Similar to OSIGBa0145N07.3 protein.
Os12g0160650	0.16	0.001	0.223333	-7.32193	Down	7.80305	Up	Hypothetical protein.
Os11g0145200	15.4633	6.32	27.0233	-1.29085	Down	2.09621	Up	UDP-glucuronosyl/UDP-glucosyltransferase family protein.
Os02g0302200	10.5567	4.72333	15.4333	-1.16028	Down	1.70817	Up	Similar to aminotransferase family protein.
Os05g0215300	4.45333	2.14	8.93333	-1.05727	Down	2.06159	Up	UDP-glucuronosyl/UDP-glucosyltransferase family protein.
Os09g0400200	5.65	2.71667	27.29	-1.05641	Down	3.32846	Up	Similar to Cinnamyl alcohol dehydrogenase (EC 1.1.1.195).
Os10g0166600	6.98333	2.14333	28.7767	-1.70406	Down	3.74697	Up	Cytochrome P450 family protein.
Os09g0128400	3.91667	1.63667	16.4767	-1.25887	Down	3.33159	Up	Conserved hypothetical protein.
Os11g0481500	5.88333	2.85667	6.78667	-1.0423	Down	1.24837	Up	Conserved hypothetical protein.
MSTRG.26471	0.463333	0.08	0.826667	-2.53398	Down	3.36923	Up	--
Os10g0338858	0.563333	0.0333333	0.956667	-4.07895	Down	4.84298	Up	Conserved hypothetical protein.
Os12g0527301	5.00333	2.4	10.6333	-1.05986	Down	2.14749	Up	Hypothetical gene.
Os06g0634700	1.22667	0.583333	3.73333	-1.07235	Down	2.67807	Up	Conserved hypothetical protein.
Os04g0659300	57.0467	15.47	108.71	-1.88267	Down	2.81294	Up	Receptor-like protein Root development Salt stress response Regulation of iron acquisition
Os10g0427900	4.84667	2.32	5.3	-1.06287	Down	1.19187	Up	Conserved hypothetical protein.
Os04g0323500	1.47	0.706667	2.23	-1.05671	Down	1.65794	Up	Hypothetical protein.
Os02g0505500	4.75667	1.48333	4.98667	-1.68111	Down	1.74923	Up	Conserved hypothetical protein.
Os02g0240300	2.55	0.87	55.32	-1.55141	Down	5.99064	Up	Similar to Class III peroxidase GvPx2b (Fragment).
Os12g0428000	29.55	8.1	19.82	-1.86716	Down	1.29096	Up	Similar to senescence-associated protein DIN1.
Os02g0695900	5.08333	2.46333	5.84	-1.04516	Down	1.24536	Up	Similar to oligopeptide transporter 4.
Os09g0273950	12.2267	5.91667	23.42	-1.04717	Down	1.98488	Up	Conserved hypothetical protein.
Os08g0137400	24.9667	10.0467	32.9867	-1.31329	Down	1.71517	Up	Cupredoxin domain containing protein.
Os03g0409100	10.3333	4.72	18.07	-1.13045	Down	1.93674	Up	Hypothetical conserved gene.
Os01g0313300	3.59	1.21333	13.25	-1.56501	Down	3.44894	Up	Similar to EREBP-3 protein (Fragment).
Os01g0757200	15.6	3.16	9.51	-2.30355	Down	1.58952	Up	GA 2-oxidase3 GA metabolism
Os01g0392600	3.04667	0.683333	3.55	-2.15657	Down	2.37716	Up	Conserved hypothetical protein.
Os11g0655900	3.24667	0.5	3.20333	-2.69896	Down	2.67957	Up	Thioredoxin fold domain containing protein.
Os07g0235200	0.226667	0.0166667	1.04667	-3.76553	Down	5.97269	Up	Protein of unknown function DUF296 domain containing protein.
Os03g0805700	4.51667	2.11333	5.74	-1.09574	Down	1.44153	Up	Similar to Pheophorbide a oxygenase.
Os04g0119000	3.52	0.876667	76.19	-2.00548	Down	6.44143	Up	Similar to H0716A07.5 protein.
Os04g0679400	58.8833	25.9167	181.217	-1.18398	Down	2.80576	Up	Similar to H0801D08.15 protein.
Os01g0222600	59.17	15.1233	74.2233	-1.96809	Down	2.2951	Up	Conserved hypothetical protein.
Os04g0583200	10.3567	3.52	8.85667	-1.55691	Down	1.33119	Up	Conserved hypothetical protein.
Os06g0564700	1.23667	0.59	2.90333	-1.06767	Down	2.29892	Up	Similar to Cysteine synthase (EC 4.2.99.8).
Os11g0671100	30.5433	10.0067	87.8767	-1.6099	Down	3.13452	Up	Hypothetical protein.
Os01g0844000	7.13333	3.16667	9.65	-1.17161	Down	1.60756	Up	Conserved hypothetical protein.
Os01g0102900	152.517	66.5233	5965.51	-1.19703	Down	6.48664	Up	Light-regulated protein Regulation of light-dependent attachment of LEAF-TYPE FERREDOXIN-NADP+ OXIDOREDUCTASE (LFNR) to the thylakoid membrane
Os03g0702500	1.07333	0.376667	1.41667	-1.51074	Down	1.91114	Up	UDP-glucuronosyl/UDP-glucosyltransferase family protein.
Os01g0303800	18.4467	5.40667	24.4	-1.77055	Down	2.17407	Up	UspA domain containing protein.
Os11g0153100	2.52	0.636667	6.95667	-1.98481	Down	3.44979	Up	Conserved hypothetical protein.
Os01g0542100	0.116667	0.00666667	0.06	-4.12928	Down	3.16993	Up	Conserved hypothetical protein.
Os06g0559600	0.803333	0.316667	1.27667	-1.34303	Down	2.01134	Up	Hypothetical conserved gene.
Os05g0555600	1.68333	0.46	38.58	-1.87162	Down	6.39008	Up	Similar to Glutamate synthase [NADH] amyloplastic.
Os10g0330000	131.457	62.1667	422.74	-1.08037	Down	2.76556	Up	Conserved hypothetical protein.
Os10g0498100	0.92	0.433333	1.21333	-1.08616	Down	1.48543	Up	Alpha/beta hydrolase fold-1 domain containing protein.
Os06g0147100	102.607	26.5267	179.423	-1.95161	Down	2.75785	Up	Similar to cDNA clone:J023088C01 full insert sequence.
Os01g0973100	1.94333	0.74	18.56	-1.39294	Down	4.64853	Up	Hypothetical conserved gene.
Os05g0355400	10.6	1.22	98.7567	-3.11911	Down	6.33893	Up	UspA domain containing protein.
Os06g0642500	1.42	0.596667	4.61	-1.25089	Down	2.94977	Up	Cytochrome P450 domain containing protein.
Os09g0328800	3.64	1.71667	3.80667	-1.08433	Down	1.14892	Up	Hypothetical conserved gene.
Os02g0676800	0.296667	0.07	0.443333	-2.08342	Down	2.66297	Up	Similar to Dehydration responsive element binding protein 1E (DREB1E protein).
Os07g0417600	0.616667	0.001	0.656667	-9.26835	Down	9.35902	Up	Thaumatin pathogenesis-related family protein.
Os07g0593000	3.71333	0.84	3.17	-2.14425	Down	1.91602	Up	C2H2 transcription factor Leaf development
Os10g0180800	15.57	4.22333	14.88	-1.88231	Down	1.81692	Up	Wall-associated kinase Negative regulation of rice blast resistance
Os05g0491200	7.64667	3.34	17.8933	-1.19498	Down	2.4215	Up	Similar to SNF1 kinase complex anchoring protein (Fragment).
Os09g0545300	7.54667	3.77	26.7333	-1.00128	Down	2.826	Up	SAUR family protein Negative regulator of auxin synthesis and transport
Os10g0462600	11.56	5.20667	18.0367	-1.15071	Down	1.7925	Up	Conserved hypothetical protein.
Os01g0879100	12.37	5.84333	15.0867	-1.08198	Down	1.36841	Up	Hypothetical protein.
Os12g0256000	4.62	2.05	13.0633	-1.17227	Down	2.67183	Up	Alpha/beta hydrolase fold-3 domain containing protein.
Os01g0387133	2.15	0.706667	2.78333	-1.60523	Down	1.97771	Up	Hypothetical gene.
Os12g0549700	5.86667	2.27333	7.74333	-1.36773	Down	1.76815	Up	Hypothetical conserved gene.
MSTRG.14825	2.56	1.17667	2.52667	-1.12144	Down	1.10253	Up	--
Os07g0173850	2.88	1.15333	5.26	-1.32026	Down	2.18925	Up	Hypothetical gene.
Os05g0491000	9.16	3.70333	12.69	-1.30652	Down	1.7768	Up	EF-Hand type domain containing protein.
Os03g0606333	0.773333	0.09	0.843333	-3.10309	Down	3.22811	Up	Hypothetical gene.
Os10g0165400	17.3633	8.14667	29.67	-1.09176	Down	1.86472	Up	Hypothetical gene.
Os05g0525900	13.02	6.05667	20.53	-1.10413	Down	1.76114	Up	Similar to Zing finger transcription factor PEI1.
Os03g0119700	1.84	0.79	3.79	-1.21978	Down	2.26227	Up	Pentatricopeptide repeat domain containing protein.
MSTRG.32455	0.573333	0.133333	3.57333	-2.10434	Down	4.74416	Up	--
Os06g0637500	28.68	11.0467	28.11	-1.37643	Down	1.34747	Up	Similar to MYB transcription factor R2R3 type.
Os10g0565150	10.1033	4.96333	10.17	-1.02545	Down	1.03494	Up	Hypothetical gene.
Os02g0199800	0.583333	0.21	0.703333	-1.47393	Down	1.74382	Up	Similar to No pollen.
Os10g0524600	31.1567	10.5633	28.32	-1.56048	Down	1.42276	Up	Peptidase S8 subtilisin-related domain containing protein.
Os06g0559400	2.79	0.743333	13.1133	-1.90818	Down	4.14088	Up	Conserved hypothetical protein.
Os07g0663800	29.49	12.9233	59.11	-1.19025	Down	2.19342	Up	Similar to Oxidoreductase short chain dehydrogenase/reductase family protein expressed.
Os04g0535200	12.68	3.54667	16.6967	-1.83802	Down	2.23502	Up	Peptidase A1 domain containing protein.
Os11g0671000	622.193	222.773	2162.33	-1.48179	Down	3.27894	Up	Similar to Dormancy-associated protein.
Os06g0697000	197.243	53.4033	182.39	-1.88497	Down	1.77202	Up	Similar to Xyloglucan endo-transglucosylase/hydrolase 1.
Os12g0267900	4.68333	2.06667	11.3467	-1.18023	Down	2.45689	Up	Zinc finger RING/FYVE/PHD-type domain containing protein.
Os06g0295900	1.97333	0.693333	3.46	-1.50901	Down	2.31915	Up	Hypothetical conserved gene.
Os03g0125600	36.0633	17.39	47.71	-1.05227	Down	1.45603	Up	Ser Thr specific protein kinase-like protein.
Os04g0688300	26.5033	9.82333	24.0633	-1.43189	Down	1.29255	Up	Haem peroxidase plant/fungal/bacterial family protein.
MSTRG.33257	13.6633	5.76333	16.93	-1.24533	Down	1.55461	Up	PREDICTED: probable receptor-like protein kinase At5g15080 [Oryza sativa Japonica Group]
Os04g0388700	5.57667	2.76333	13.6367	-1.01299	Down	2.30301	Up	Similar to OSIGBa0096P03.3 protein.
Os07g0153150	0.33	0.07	0.696667	-2.23704	Down	3.31504	Up	Conserved hypothetical protein.
Os06g0271400	2.20667	0.906667	5.78333	-1.28322	Down	2.67326	Up	Transposase Ptta/En/Spm plant domain containing protein.
Os06g0306600	4.32333	2.12333	7.00333	-1.02581	Down	1.72171	Up	Alpha/beta hydrolase fold-3 domain containing protein.
Os08g0462300	2.48	1.11	3.06667	-1.15978	Down	1.46611	Up	Cyclin-like F-box domain containing protein.
Os02g0757100	69.5933	9.14	62.1433	-2.92868	Down	2.76533	Up	Similar to Phi-1 protein.
Os08g0502400	21.57	8.86	17.9433	-1.28365	Down	1.01807	Up	FAS1 domain domain containing protein.
Os01g0117200	13.93	4.55333	11.1633	-1.6132	Down	1.29377	Up	Similar to ARK protein (Fragment).
Os10g0557700	2.25	0.996667	3.04333	-1.17474	Down	1.61047	Up	Conserved hypothetical protein.
Os04g0604300	24.08	5.94	25.6933	-2.0193	Down	2.11286	Up	Similar to Xyloglucan endotransglucosylase/hydrolase protein 24 precursor (EC 2.4.1.207) (At-XTH24) (XTH-24) (Meristem protein 5) (MERI-5 protein) (MERI5 protein) (Endo-xyloglucan transferase) (Xyloglucan endo-1 4-beta-D-glucanase).
Os02g0753300	99.49	47.79	97.0767	-1.05784	Down	1.02242	Up	Lipoxygenase LH2 domain containing protein.
Os01g0296450	12.0267	5.01333	10.1167	-1.26239	Down	1.01289	Up	Hypothetical protein.
Os01g0594300	5.30667	2.05	4.21333	-1.37218	Down	1.03934	Up	Similar to leucine-rich repeat family protein / extensin family protein.
Os01g0740400	1.93	0.49	1.93333	-1.97775	Down	1.98024	Up	Protein of unknown function DUF1005 family protein.
Os01g0635200	10.9467	4.99	14.44	-1.13338	Down	1.53296	Up	Homeodomain-like containing protein.
Os05g0355300	13.33	6.45	13.3867	-1.04731	Down	1.05343	Up	Similar to PIT1.
Os02g0756600	1.58667	0.403333	1.85667	-1.97595	Down	2.20267	Up	Similar to Phi-1 protein.
Os09g0528700	5.52667	2.67667	8.78	-1.04597	Down	1.71378	Up	Similar to Cytochrome p450 (CYP78A9).
Os10g0195600	9.18333	2.00667	4.53333	-2.19422	Down	1.17577	Up	Transferase family protein.
Os12g0163700	11.4167	3.66333	9.01	-1.63991	Down	1.29837	Up	Similar to Actin 7 (Actin 2).
Os05g0188700	10.5367	3.3	7.69333	-1.67488	Down	1.22114	Up	Leucine-rich repeat domain containing protein.
Os02g0178700	4.82333	2.12333	4.54	-1.1837	Down	1.09636	Up	Helix-loop-helix DNA-binding domain containing protein.
Os04g0574500	0.99	0.273333	0.793333	-1.85677	Down	1.53727	Up	Similar to Growth-regulating factor 12.
Os01g0171200	0.423333	0.04	0.196667	-3.40372	Down	2.29768	Up	Conserved hypothetical protein.
Os03g0773000	32.1433	12.1167	30.4967	-1.40753	Down	1.33166	Up	Protein of unknown function DUF1005 family protein.
Os06g0220600	3.01	0.62	2.11	-2.27942	Down	1.7669	Up	RNA recognition motif domain domain containing protein.
Os04g0689300	2.72333	0.993333	2.52333	-1.45502	Down	1.34498	Up	PLC-like phosphodiesterase TIM beta/alpha-barrel domain domain containing protein.
Os01g0864000	5.63	1.75333	3.95667	-1.68303	Down	1.17419	Up	Plant-specific transcription factor A member of OVATE family protein Positive mediation of brassinosteroid signaling Plant growth and development
Os04g0381400	1.63	0.593333	1.75	-1.45796	Down	1.56044	Up	Similar to OSIGBa0092E09.2 protein.
Os08g0469500	3.15	1.23	2.58667	-1.35669	Down	1.07244	Up	Similar to F-box domain containing protein.
Os02g0226600	3.1	1.42333	3.13	-1.12299	Down	1.13689	Up	Homeodomain-related domain containing protein.
Os02g0732200	12.0333	4.26333	8.92667	-1.49698	Down	1.06614	Up	Armadillo-like helical domain containing protein.
Os04g0231800	0.846667	0.203333	1.46	-2.05795	Down	2.84405	Up	Conserved hypothetical protein.
Os03g0374500	1.32333	0.646667	1.39	-1.03308	Down	1.10399	Up	Similar to calmodulin-binding family protein.
Os03g0347900	22.4233	7.81	18.62	-1.52161	Down	1.25346	Up	Terpenoid synthase domain containing protein.
Os02g0582600	5.23333	2.40333	5.93667	-1.12269	Down	1.30462	Up	Heavy metal transport/detoxification protein domain containing protein.
Os03g0362500	3.87333	1.84	4.52	-1.07387	Down	1.29662	Up	Similar to Terpene synthase family metal binding domain containing protein expressed.
Os09g0423500	18.83	4.48667	13.7867	-2.06932	Down	1.61956	Up	Peptidase A1 domain containing protein.
Os03g0304500	16.33	6.47	13.13	-1.33569	Down	1.02103	Up	Tetratricopeptide-like helical domain containing protein.
Os03g0286500	51.77	10.8033	25.88	-2.26064	Down	1.26036	Up	Similar to RNA-binding region containing protein 1 (HSRNASEB) (ssDNA binding protein SEB4) (CLL-associated antigen KW-5). Splice isoform 2.
Os02g0285300	126.22	32.9333	85.86	-1.93832	Down	1.38244	Up	DREPP plasma membrane polypeptide family protein.
Os01g0686300	0.146667	0.001	0.12	-7.1964	Down	6.90689	Up	UDP-glucuronosyl/UDP-glucosyltransferase family protein.
MSTRG.10851	1.25	0.53	1.37667	-1.23786	Down	1.37712	Up	PREDICTED: probable serine/threonine-protein kinase At1g54610 [Oryza sativa Japonica Group]
Os03g0137800	6.17667	3.06667	6.78	-1.01016	Down	1.14461	Up	Cyclin-dependent kinase inhibitor family protein.
Os11g0175700	8.63333	3.89	7.79	-1.15015	Down	1.00185	Up	Similar to Transcription factor PCF3.
Os01g0909400	7.95667	1.28	5.32	-2.63602	Down	2.05528	Up	Protein of unknown function DUF868 plant family protein.
Os03g0388900	39.86	19.51	46.83	-1.03073	Down	1.26322	Up	Peptidase C14 caspase catalytic domain containing protein.
Os05g0217800	27.7333	3.98667	9.97667	-2.79837	Down	1.32337	Up	BURP domain containing protein.
Os04g0360500	0.64	0.303333	1.14667	-1.07717	Down	1.91847	Up	Similar to OSIGBa0111E13.1 protein.
Os01g0207400	41.3433	18.58	39.5067	-1.1539	Down	1.08835	Up	Similar to peptide-N4-asparagine amidase A.
Os06g0695500	67.39	25.69	52.7533	-1.39133	Down	1.03806	Up	Similar to Peroxidase 16 precursor (EC 1.11.1.7) (Atperox P16) (ATP22a).
Os01g0935800	5.35	0.646667	2.63	-3.04844	Down	2.02397	Up	Similar to BRASSINOSTEROID INSENSITIVE 1-associated receptor kinase 1.
Os12g0459100	14.18	4.37333	10.6433	-1.69705	Down	1.28314	Up	Similar to Transferase family protein.
Os05g0180300	25.4833	8.73	18.1333	-1.5455	Down	1.05459	Up	Leucine-rich repeat plant specific containing protein.
Os07g0590700	239.587	65.77	176.86	-1.86505	Down	1.42711	Up	Similar to transcriptional regulatory protein algP.
Os01g0880800	2.29667	0.73	3.5	-1.65357	Down	2.26139	Up	Similar to Acyl-[acyl-carrier-protein] desaturase chloroplast precursor (EC 1.14.19.2) (Stearoyl-ACP desaturase).
Os03g0119300	40.5767	11.0967	28.69	-1.87052	Down	1.37042	Up	Peptidase S8 subtilisin-related domain containing protein.
Os05g0191700	25.11	10.6467	23.66	-1.23786	Down	1.15205	Up	Similar to Stem 28 kDa glycoprotein.
Os05g0217000	60.3433	9.99667	44.3767	-2.59368	Down	2.15028	Up	Protein of unknown function DUF1070 family protein.
Os06g0714366	1.61333	0.22	1.73667	-2.87447	Down	2.98075	Up	Hypothetical protein.
Os05g0594500	54.5467	26.8167	65.8467	-1.02436	Down	1.29598	Up	Invasin/intimin cell-adhesion domain containing protein.
Os03g0709100	5.87	2.16667	5.7	-1.43788	Down	1.39548	Up	Uclacyanin (UCL) Phytocyanin family protein Regulation of photosynthesis and grain yield
Os06g0219900	0.9	0.296667	1.49667	-1.60108	Down	2.33484	Up	Similar to Phi-1 protein.
MSTRG.33483	2.00333	0.906667	3.02667	-1.14376	Down	1.73909	Up	--
Os10g0551800	5.29	0.67	3.32667	-2.98103	Down	2.31184	Up	Root-specific protein (RCc2 protein).
Os05g0440900	1.23667	0.436667	1.53	-1.50185	Down	1.80893	Up	Protein of unknown function DUF623 plant domain containing protein.
Os07g0578333	2.16333	0.756667	1.98	-1.51553	Down	1.38777	Up	Conserved hypothetical protein.
MSTRG.4027	1.22667	0.453333	1.77333	-1.4361	Down	1.96782	Up	--
Os02g0756200	1.37333	0.323333	1.37667	-2.08659	Down	2.09009	Up	Similar to Phi-1-like phosphate-induced protein.
MSTRG.3378	2.56333	0.176667	5.36	-3.85892	Down	4.92313	Up	PDI-like [Oryza sativa Japonica Group]
Os12g0616400	4.31	1.63333	4.13333	-1.39987	Down	1.33949	Up	Similar to Isoform 2 of Transcription factor PCF8.
Os02g0198000	0.39	0.06	0.486667	-2.70044	Down	3.0199	Up	Protein of unknown function DUF1677 Oryza sativa family protein.
Os07g0406800	5.53	2.42667	4.92	-1.1883	Down	1.01968	Up	DNA primase large subunit eukaryotic domain containing protein.
Os10g0328600	3.71	1.83667	4.57667	-1.01433	Down	1.31721	Up	Hypothetical protein.
Os06g0696400	413.867	58.6067	251.67	-2.82003	Down	2.1024	Up	Xyloglycan endo-transglycosylase precursor.
Os03g0680700	2.15333	0.873333	2.23333	-1.30197	Down	1.35459	Up	Similar to Knotted1-interacting protein.
Os07g0277200	7.91333	2.74333	6.87667	-1.52836	Down	1.32578	Up	Conserved hypothetical protein.
Os09g0447300	0.69	0.27	1.60667	-1.35364	Down	2.57304	Up	Cytochrome P450 family protein.
Os06g0696450	4.62	1.03333	4.54	-2.16059	Down	2.13539	Up	Hypothetical protein.
Os08g0414500	6.37	1.33	4.44667	-2.25987	Down	1.7413	Up	Hypothetical conserved gene.
Os03g0105000	1.92667	0.686667	1.78	-1.48843	Down	1.3742	Up	Hypothetical protein.
Os02g0696500	78.4033	26.44	54.11	-1.56819	Down	1.03317	Up	Concanavalin A-like lectin/glucanase domain containing protein.
Os01g0580500	4.96	2.46667	5.85333	-1.00778	Down	1.2467	Up	ACC oxidase Ethylene biosynthesis
Os06g0218800	1.79	0.39	1.86	-2.19841	Down	2.25376	Up	Uncharacterised protein family UPF0503 domain containing protein.
Os10g0531900	1.06667	0.453333	1.17333	-1.23447	Down	1.37197	Up	Similar to BZIP-like protein.
Os02g0756800	8.53333	3.13333	17.54	-1.44541	Down	2.48488	Up	Phosphate-induced protein 1 conserved region family protein.
Os06g0247000	6.82667	2.68667	6.67667	-1.34536	Down	1.31331	Up	Similar to Avr9/Cf-9 rapidly elicited protein 231.
Os09g0455300	3.79	1.53667	4.53	-1.30239	Down	1.55971	Up	Similar to INDEHISCENT protein.
Os09g0524001	2.41667	0.563333	1.51667	-2.10096	Down	1.42884	Up	Hypothetical gene.
Os07g0133500	14.27	5.27333	12.1633	-1.4362	Down	1.20575	Up	Protein of unknown function DUF1005 family protein.
Os02g0533700	1.85667	0.77	3.09667	-1.26978	Down	2.00779	Up	Conserved hypothetical protein.
Os01g0270300	29.2367	13.9667	44.14	-1.06579	Down	1.6601	Up	Similar to Cationic peroxidase isozyme 40K precursor.
Os11g0153400	12.19	5.9	12.1133	-1.04691	Down	1.03781	Up	Similar to Rac GTPase activating protein 3 (Fragment).
Os01g0500400	4.12	1.88667	3.93333	-1.1268	Down	1.05991	Up	Conserved hypothetical protein.
Os01g0929200	7.78333	2.58333	7.17	-1.59115	Down	1.47274	Up	Serine/threonine protein kinase domain containing protein.
Os08g0119500	3.11	1.45333	4.82	-1.09755	Down	1.72967	Up	Methyltransferase type 11 domain containing protein.
Os01g0111100	22.42	7.73667	19.6733	-1.535	Down	1.34646	Up	Cyclophilin-like domain containing protein.
Os05g0192100	26.11	12.5533	26.08	-1.05653	Down	1.05487	Up	Similar to Stem 28 kDa glycoprotein.
Os01g0232200	2.58333	1.09333	2.51333	-1.2405	Down	1.20087	Up	WD40 repeat domain containing protein.
Os09g0304500	2.48667	1.16667	2.54	-1.09182	Down	1.12244	Up	Protein of unknown function DUF247 plant family protein.
Os07g0250900	5.92	2.89333	9.19667	-1.03286	Down	1.66838	Up	Harpin-induced 1 domain containing protein.
Os11g0257800	2.25667	1.09667	2.91	-1.04107	Down	1.40789	Up	Hypothetical protein.
Os06g0115700	30.45	11.39	25.9133	-1.41867	Down	1.18593	Up	Conserved hypothetical protein.
Os04g0196200	0.8	0.263333	0.82	-1.60311	Down	1.63873	Up	Winged helix repressor DNA-binding domain containing protein.
Os04g0619600	5.23333	2.51333	5.91333	-1.05813	Down	1.23437	Up	Similar to Resistance protein candidate (Fragment).
Os06g0207966	11.3267	2.88333	7.61667	-1.97391	Down	1.40142	Up	Similar to Homeobox-leucine zipper protein ROC8.
Os10g0499400	22.2133	10.2733	32.2367	-1.11252	Down	1.6498	Up	Cystathionine beta-synthase core domain containing protein.
Os07g0633400	0.863333	0.0666667	0.523333	-3.69488	Down	2.97269	Up	IQ calmodulin-binding region domain containing protein.
Os01g0854000	42.66	18.2667	42.0333	-1.22367	Down	1.20232	Up	Similar to AER.
MSTRG.9710	5.2	1.02333	4.24333	-2.34524	Down	2.05192	Up	hydroxyproline-rich glycoprotein -like [Oryza sativa Japonica Group]
Os12g0438400	18.4967	9.22	27.3633	-1.00443	Down	1.56941	Up	Hypothetical conserved gene.
Os10g0163370	2.01667	0.753333	3.12667	-1.42061	Down	2.05327	Up	Lecithin:cholesterol acyltransferase family protein.
Os07g0684100	35.0133	15.62	48.63	-1.16451	Down	1.63845	Up	Similar to Thioredoxin-like 1.
Os01g0728100	43.85	20.3633	41.1567	-1.1066	Down	1.01515	Up	Lipase GDSL domain containing protein.
Os05g0272200	1.82667	0.716667	2.38	-1.34984	Down	1.73159	Up	Similar to F20D23.27 protein.

## Sheet: Down-regulated DEGs in roots
Table S3. DEGs with expression recovered after sulfate resupply: Down-regulagted DEGs in roots
Gene ID	CK_R_mean	S0_R_mean	SR_R_mean	log2 of S0/CK	U/D of S0/CK	log2 of SR/S0	U/D of SR/S0	Annotation
Os07g0193000	36.1267	7.14667	14.51	-2.33772	Down	1.02171	Up	HIPL1 protein precursor.
Os11g0158600	19.4633	9.63	20.0133	-1.01515	Down	1.05535	Up	Homeodomain-like domain containing protein.
Os07g0631900	11.3133	3.67667	16.44	-1.62155	Down	2.16074	Up	Nucleotide-binding alpha-beta plait domain containing protein.
MSTRG.18847	2.31	0.496667	3.41333	-2.21754	Down	2.78083	Up	--
Os08g0245200	22	7.55	18.5833	-1.54295	Down	1.29946	Up	4-coumarate:coenzyme A ligase Lignin biosynthesis
Os04g0634400	4.94	0.853333	2.3	-2.53333	Down	1.43045	Up	Similar to H0315F07.5 protein.
Os04g0365100	4.85667	1.28667	3.24	-1.91633	Down	1.33236	Up	Similar to OSIGBa0135K14.8 protein.
Os07g0673801	5.85333	2.37667	7.81333	-1.30032	Down	1.717	Up	Conserved hypothetical protein.
Os03g0850900	65.5533	19.6433	41.3433	-1.73863	Down	1.07361	Up	Similar to Chemocyanin precursor (Basic blue protein) (Plantacyanin).
Os08g0374000	22.8233	9.21667	26.06	-1.30819	Down	1.49952	Up	Bet v I allergen family protein.
Os12g0568500	2152	242.467	719.623	-3.14982	Down	1.56946	Up	Metallothionein-like protein type 1.
Os09g0255800	3.59	1.25	2.81	-1.52206	Down	1.16864	Up	Hypothetical protein.
Os05g0565400	7.1	1.53	5.93	-2.21429	Down	1.9545	Up	Protein of unknown function DUF561 family protein.
MSTRG.31606	0.923333	0.403333	1.70667	-1.19488	Down	2.08114	Up	--
Os02g0302200	4.63667	2.06	5.01333	-1.17044	Down	1.28313	Up	Similar to aminotransferase family protein.
Os09g0431300	13.5567	3.26333	6.66	-2.05458	Down	1.02918	Up	Similar to MYB transcription factor MYB71 (Fragment).
Os02g0115900	166.22	58.6033	166.24	-1.50404	Down	1.50421	Up	Endosperm lumenal binding protein.
Os05g0369700	3.12667	0.35	1.71	-3.1592	Down	2.28857	Up	Exo70 exocyst complex subunit domain containing protein.
Os12g0568350	29.6467	3.45667	10.96	-3.10042	Down	1.66479	Up	Hypothetical gene.
Os03g0439700	65.57	1.69333	4.18333	-5.2751	Down	1.30479	Up	Protein of unknown function DUF1230 family protein.
Os01g0924200	8.45667	1.83667	5.22333	-2.203	Down	1.50788	Up	Conserved hypothetical protein.
Os02g0745100	376.443	94.6867	297.84	-1.9912	Down	1.6533	Up	Aquaporin NIP III subfamily protein Aquaporin Silicon influx transporter Arsenic species (As) uptake Arsenite efflux Selenite (Se) uptake Water transport
MSTRG.7752	2.98	1.29667	4.92667	-1.2005	Down	1.9258	Up	--
Os06g0718400	39.9733	8.58333	23.2467	-2.21943	Down	1.43741	Up	Hypothetical conserved gene.
Os04g0411651	2.32667	0.82	2.8	-1.50457	Down	1.77173	Up	Hypothetical gene.
Os01g0831250	5.31	1.45	3.71333	-1.87266	Down	1.35666	Up	Hypothetical gene.
Os10g0543500	16.12	5.79667	16.56	-1.47556	Down	1.51441	Up	Six-bladed beta-propeller TolB-like domain containing protein.
Os07g0533300	14.0267	6.43667	19.7467	-1.12379	Down	1.61722	Up	Peptidase A1 domain containing protein.
Os05g0366000	0.9	0.266667	1.06667	-1.75489	Down	2	Up	Beta-glucosidase 21.
Os07g0528200	2.27333	0.38	1.7	-2.58074	Down	2.16146	Up	Conserved hypothetical protein.
Os12g0238000	2.05667	1.02333	2.29667	-1.00703	Down	1.16627	Up	SANT domain DNA binding domain containing protein.
Os07g0142700	9.57333	0.91	2.21	-3.39508	Down	1.28011	Up	Transferase family protein.
Os01g0587400	7.75333	0.983333	2.34	-2.97906	Down	1.25076	Up	Serine/threonine protein kinase-related domain containing protein.
Os02g0828500	2.05	0.9	2.98333	-1.18763	Down	1.72893	Up	Tetratricopeptide-like helical domain containing protein.
Os08g0278900	24.9267	8.37667	35.7433	-1.57324	Down	2.09323	Up	MIR domain containing protein.
Os02g0594232	4.05333	0.1	0.713333	-5.34104	Down	2.83458	Up	Hypothetical conserved gene.
Os03g0179900	12.84	6.32333	25.6367	-1.02189	Down	2.01945	Up	Similar to Avr9/Cf-9 rapidly elicited protein 44 (Fragment).
Os06g0210900	3.80333	1.27	4.09333	-1.58244	Down	1.68845	Up	Lipase class 3 family protein.
Os05g0160300	274.097	84.35	197.377	-1.70022	Down	1.22649	Up	Bifunctional inhibitor/plant lipid transfer protein/seed storage domain containing protein.
Os03g0802600	13.6467	4.87667	22.5533	-1.48458	Down	2.20937	Up	ATPase AAA-type core domain containing protein.
Os02g0689900	19.8467	7.77	17.38	-1.35291	Down	1.16144	Up	TGF-beta receptor type I/II extracellular region family protein.
Os01g0717700	28.6	11.4833	40.2267	-1.31647	Down	1.80861	Up	EGF-like alliinase domain containing protein.
Os06g0564700	3.31	1.09	3.48667	-1.6025	Down	1.67752	Up	Similar to Cysteine synthase (EC 4.2.99.8).
Os12g0191300	3.50667	1.56	3.87	-1.16855	Down	1.31079	Up	Similar to Phage head-tail adaptor family protein expressed.
Os06g0588800	1.31333	0.476667	1.16	-1.46218	Down	1.28307	Up	Protein kinase catalytic domain domain containing protein.
Os06g0271300	1.77667	0.506667	1.77667	-1.81006	Down	1.81006	Up	Similar to OSIGBa0140C02.5 protein.
Os07g0418600	98.22	7.01667	40.01	-3.80716	Down	2.5115	Up	Proline-rich glycoprotein ABA-dependent inhibition of root growth
Os01g0107400	4.28667	1.17333	5.42	-1.86924	Down	2.20768	Up	Conserved hypothetical protein.
Os09g0517900	4.28667	1.49667	18.48	-1.5181	Down	3.62614	Up	UDP-glucuronosyl/UDP-glucosyltransferase family protein.
Os01g0102900	7.95	3.34333	29.74	-1.24967	Down	3.15305	Up	Light-regulated protein Regulation of light-dependent attachment of LEAF-TYPE FERREDOXIN-NADP+ OXIDOREDUCTASE (LFNR) to the thylakoid membrane
Os07g0520100	11.81	3.97667	8.04667	-1.57038	Down	1.01683	Up	Similar to taxane 10-beta-hydroxylase.
Os04g0192350	7.53333	2.66667	8.6	-1.49825	Down	1.6893	Up	Similar to H0124E07.4 protein.
Os03g0290900	9.01667	2.86667	6.67667	-1.65322	Down	1.21975	Up	Protein of unknown function DUF231 plant domain containing protein.
Os06g0206000	3.99333	1.56	4.3	-1.35605	Down	1.46279	Up	Similar to carbon-nitrogen hydrolase family protein.
MSTRG.31415	2.62333	1.28667	3.72	-1.02776	Down	1.53166	Up	--
Os02g0594166	23.3933	1.21	3.34667	-4.27302	Down	1.46772	Up	Conserved hypothetical protein.
Os03g0411300	33.2667	15.5267	207.087	-1.09933	Down	3.73741	Up	EF-Hand type domain containing protein.
Os03g0797400	1.73	0.456667	1.73667	-1.92156	Down	1.92711	Up	Similar to Indole-3-glycerol phosphate lyase.
Os07g0182900	2.46	0.896667	3.58333	-1.45601	Down	1.99866	Up	DNA methyltransferase Maintenance of methylation Gene silencing
Os02g0586900	13.7933	1.48333	5.56667	-3.21706	Down	1.90797	Up	Hypothetical conserved gene.
Os10g0522000	13.29	5.08	14.2933	-1.38744	Down	1.49244	Up	Similar to Methyltransferase family protein expressed.
Os12g0156866	1.47	0.323333	0.953333	-2.18472	Down	1.55996	Up	Similar to Amino acid permease family protein expressed.
MSTRG.19903	49.5567	8.19	42.2633	-2.59714	Down	2.36747	Up	--
MSTRG.12314	13.39	4.03	8.88	-1.7323	Down	1.13978	Up	--
Os03g0130300	129.717	62.8	140.87	-1.04653	Down	1.16553	Up	Similar to Cp-thionin.
Os11g0138900	58.17	7.07667	22.4233	-3.03913	Down	1.66386	Up	Alpha/beta hydrolase fold-3 domain containing protein.
Os07g0187000	1.5	0.513333	1.2	-1.54699	Down	1.22507	Up	Conserved hypothetical protein.
MSTRG.5453	7.51	1.20333	3.24667	-2.64178	Down	1.43192	Up	PREDICTED: probable WRKY transcription factor 32 [Oryza sativa Japonica Group]
Os09g0541100	6.19333	2.54667	6.18333	-1.28211	Down	1.27977	Up	Cupredoxin domain containing protein.
Os05g0424300	17.3433	4.79667	15.5167	-1.85428	Down	1.69371	Up	Cytochrome P450 family protein.
Os07g0598800	0.333333	0.001	0.11	-8.38082	Down	6.78136	Up	Hypothetical conserved gene.
Os01g0831300	4.40333	1.47333	3.39	-1.57951	Down	1.2022	Up	Similar to Ammonium transporter.
Os09g0344800	19.39	9.31333	30.7867	-1.05794	Down	1.72494	Up	Protein of unknown function DUF81 family protein.
MSTRG.10553	72.7633	5.61667	49.8633	-3.69543	Down	3.15019	Up	PREDICTED: metallothionein-like protein 4C isoform X2 [Oryza sativa Japonica Group]
Os08g0254600	5.05	1.50667	3.17333	-1.74492	Down	1.07464	Up	Similar to cyclic nucleotide-gated ion channel 14.
Os01g0891700	1.29	0.486667	1.62	-1.40637	Down	1.73499	Up	Leucine-rich repeat N-terminal domain containing protein.
Os10g0539200	4.08333	0.28	1.24333	-3.86625	Down	2.15071	Up	Hypothetical conserved gene.
Os01g0371500	72.8133	13.3967	31.5333	-2.44233	Down	1.235	Up	Similar to Glutathione-S-transferase 19E50.
Os07g0642200	34.5667	8.45	36.18	-2.03236	Down	2.09817	Up	Lipase GDSL domain containing protein.
Os03g0832200	2.64	1.05667	9.46333	-1.32102	Down	3.16283	Up	Similar to Calcium-binding protein precursor (Calreticulin).
Os02g0554900	6.93667	3.20667	6.54333	-1.11317	Down	1.02895	Up	Similar to Protein disulfide isomerase (Fragment).
Os01g0872000	0.596667	0.213333	1.84667	-1.48382	Down	3.11374	Up	TGF-beta receptor type I/II extracellular region family protein.
MSTRG.31683	6.48333	0.001	0.79	-12.6625	Down	9.62571	Up	--
Os03g0375966	19.13	9.16667	20.83	-1.06137	Down	1.18419	Up	Similar to Amino acid permease family protein.
Os04g0491200	5.28667	1.88333	3.86667	-1.48907	Down	1.0378	Up	Oligopeptide transporter domain containing protein.
Os07g0640300	1.48	0.0166667	1.11	-6.47249	Down	6.05745	Up	Hypothetical conserved gene.
Os11g0615800	2.71	1.11	3.15333	-1.28773	Down	1.50632	Up	DNA repair protein RAD51 Homologous pairing
Os07g0529600	10.1767	4.79	400.657	-1.08717	Down	6.3862	Up	Similar to Thiazole biosynthetic enzyme 1-1 chloroplast precursor.
Os08g0344600	39.4467	18.5333	40.98	-1.08978	Down	1.1448	Up	Similar to Triose phosphate/phosphate translocator non-green plastid chloroplast precursor (CTPT).
Os11g0115400	5.29	1.65	3.63	-1.6808	Down	1.1375	Up	Lipid transfer protein LPT IV.
Os11g0158832	6.97	3.25333	8.04333	-1.09924	Down	1.30587	Up	Similar to Associated with HOX family protein expressed.
Os10g0159800	71.5267	25.38	57.8233	-1.49479	Down	1.18796	Up	Alcohol dehydrogenase superfamily zinc-containing protein.
Os05g0472700	27.1167	12.3333	32.25	-1.13662	Down	1.38674	Up	Similar to Metal transport protein.
Os03g0238300	12.79	4.39667	17.3433	-1.54053	Down	1.9799	Up	Endonuclease/exonuclease/phosphatase domain containing protein.
Os08g0431700	9.33333	0.77	2.96	-3.59946	Down	1.94267	Up	Hypothetical protein.
Os08g0560000	26.8567	4.08667	15.3067	-2.71628	Down	1.90516	Up	Similar to gibberellin 20 oxidase 2.
Os03g0724300	5.36333	1.94333	6.18333	-1.4646	Down	1.66985	Up	Tyrosine protein kinase domain containing protein.
Os02g0562100	1.26667	0.383333	1.40333	-1.72437	Down	1.87219	Up	DNA repair and recombination RecA-like domain containing protein.
Os01g0660700	0.786667	0.001	0.55	-9.61961	Down	9.10329	Up	Protein of unknown function DUF295 family protein.
Os02g0454500	4.05667	1.89333	4.57333	-1.09937	Down	1.27232	Up	Membrane bound O-acyl transferase MBOAT family protein.
Os08g0246100	5.16667	1.44	3.32667	-1.84316	Down	1.20801	Up	Hypothetical conserved gene.
MSTRG.5162	1.43	0.19	1.03667	-2.91194	Down	2.44788	Up	PREDICTED: probable leucine-rich repeat receptor-like protein kinase At5g49770 [Oryza sativa Japonica Group]
Os11g0262600	36.27	1.20667	5.85667	-4.90968	Down	2.27905	Up	Conserved hypothetical protein.
MSTRG.31668	13.9567	0.001	0.89	-13.7687	Down	9.79766	Up	--
Os09g0543400	8.26	3.26333	10.8367	-1.3398	Down	1.7315	Up	Ornithine decarboxylase (EC 4.1.1.17).
Os07g0418700	33.83	2.97667	26.0967	-3.50653	Down	3.1321	Up	Proline-rich glycoprotein ABA-dependent inhibition of root growth
Os07g0663500	7.05667	3.21333	12.8833	-1.13492	Down	2.00336	Up	Similar to Short-chain dehydrogenase/reductase (Fragment).
Os04g0180900	4.54667	1.51333	8.21	-1.58708	Down	2.43965	Up	Conserved hypothetical protein.
Os06g0721800	57.3967	13.5667	36.9967	-2.0809	Down	1.44733	Up	Cupredoxin domain containing protein.
Os04g0176200	9.05667	2.77333	8.48333	-1.70736	Down	1.61301	Up	Similar to N-methyltransferase.
Os02g0117200	16.7667	8.04	18.64	-1.06033	Down	1.21313	Up	Similar to MIR-interacting saposin-like protein.
Os01g0368000	2.16333	0.39	4.81333	-2.47171	Down	3.62549	Up	Similar to cDNA clone:J023132I08 full insert sequence.
Os01g0695100	13.54	3.54	14.8967	-1.93541	Down	2.07317	Up	Similar to Phosphoethanolamine N-methyltransferase.
Os02g0684100	20.5233	3.65667	15.5133	-2.48866	Down	2.08491	Up	Sulfotransferase domain domain containing protein.
Os02g0550800	3.48	0.79	2.18333	-2.13916	Down	1.46661	Up	Ammonium transporter family protein.
Os11g0678200	7.00333	1.59	5.44	-2.13901	Down	1.77458	Up	Conserved hypothetical protein.
Os05g0415700	2.99667	0.93	2.91333	-1.68806	Down	1.64737	Up	Glycoside hydrolase family 20 protein.
Os02g0757100	15.6067	3.99333	17.4933	-1.9665	Down	2.13114	Up	Similar to Phi-1 protein.
Os04g0175900	0.44	0.0433333	0.666667	-3.34395	Down	3.94342	Up	Winged helix repressor DNA-binding domain containing protein.
Os04g0308600	6.69	0.133333	8.11	-5.6489	Down	5.92659	Up	Similar to H0211A12.11 protein.
Os05g0178300	22.2067	4.65667	16.09	-2.25362	Down	1.78879	Up	Similar to Cadmium tolerant 1.
Os11g0592600	9.21	2.31667	6.35	-1.99115	Down	1.45471	Up	Targeting for Xklp2 family protein.
Os12g0614200	5.06667	0.001	1.63667	-12.3068	Down	10.6765	Up	Similar to Lipase family protein.
Os03g0770900	4.30333	1.14333	4.05	-1.91221	Down	1.82468	Up	Conserved hypothetical protein.
Os10g0552300	92.7133	3.09333	52.33	-4.90554	Down	4.0804	Up	Conserved hypothetical protein.
Os02g0829100	8.55	1.64667	8.43	-2.37638	Down	2.35598	Up	Replication protein A 30kDa.
Os01g0225500	1.83	0.35	1.51667	-2.38642	Down	2.11548	Up	Similar to 3-methyl-2-oxobutanoate hydroxymethyltransferase.
Os04g0400600	1.48	0.001	0.616667	-10.5314	Down	9.26835	Up	Similar to OSIGBa0113L04.4 protein.
Os04g0455600	14.4567	4.67667	11.2367	-1.62818	Down	1.26466	Up	Similar to H0523F07.2 protein.
Os01g0914200	2.97667	0.586667	1.74667	-2.34308	Down	1.57399	Up	Hypothetical protein.
Os09g0400000	8.41	1.60333	7.49	-2.39103	Down	2.22389	Up	Cinnamyl alcohol dehydrogenase (EC 1.1.1.195).
Os06g0554300	13.23	5.52	11.8233	-1.26107	Down	1.0989	Up	Conserved hypothetical protein.
Os01g0249800	16.5133	2.52333	7.57	-2.71023	Down	1.58496	Up	Heavy metal-associated domain HMA domain containing protein.
Os06g0327400	3.99667	1.48667	3.76667	-1.42672	Down	1.34121	Up	Conserved hypothetical protein.
Os01g0680900	38.6667	13.8533	32.4833	-1.48086	Down	1.22947	Up	Similar to Dopamine beta-monooxygenase.
Os06g0278450	1.00333	0.223333	0.976667	-2.16753	Down	2.12867	Up	Hypothetical gene.
Os06g0507900	2.90667	0.983333	2.10667	-1.56361	Down	1.09921	Up	Conserved hypothetical protein.
Os05g0280600	0.98	0.001	0.683333	-9.93664	Down	9.41645	Up	Hypothetical protein.
Os01g0607900	17.6067	3.94667	12.84	-2.15742	Down	1.70194	Up	Serine/threonine protein kinase-related domain containing protein.
Os02g0187700	6.88	1.76667	11.66	-1.96138	Down	2.72247	Up	Similar to Myb-related protein B (B-Myb) (Myb-related protein 1) (XMYB1).
Os10g0498900	8.95667	3.59667	9.24333	-1.3163	Down	1.36175	Up	Similar to Microtubule-associated protein EB1-like protein.
Os03g0748300	0.586667	0.11	1.02667	-2.41504	Down	3.22239	Up	Aldose 1-epimerase family protein.
Os02g0816400	4.05333	0.906667	2.51	-2.16046	Down	1.46904	Up	Protein of unknown function DUF3741 domain containing protein.
Os04g0419600	12.0767	2.30667	7.79	-2.38834	Down	1.75581	Up	Histone H3.
Os09g0540400	3	0.743333	3.91	-2.01288	Down	2.39509	Up	Similar to Anther-specific proline-rich protein APG.
Os02g0135300	2.30333	0.776667	1.83	-1.56836	Down	1.23648	Up	Similar to Wee1-like protein kinase.
Os01g0842500	23.0133	5.54333	17.17	-2.05364	Down	1.63106	Up	Similar to Laccase (EC 1.10.3.2).
Os05g0444300	10.4133	4.39	9.96333	-1.24614	Down	1.18241	Up	Protein of unknown function DUF914 eukaryotic family protein.
Os06g0234800	0.923333	0.243333	1.01333	-1.92392	Down	2.0581	Up	Conserved hypothetical protein.
Os08g0348300	8.33333	0.0666667	1.44333	-6.96578	Down	4.4363	Up	Hypothetical conserved gene.
Os08g0525700	1.35	0.41	1.59333	-1.71926	Down	1.95835	Up	Conserved hypothetical protein.
Os01g0962700	22.3233	8.21667	27.8133	-1.44193	Down	1.75915	Up	Similar to Peroxidase 12 precursor (EC 1.11.1.7) (Atperox P12) (PRXR6) (ATP4a).
Os02g0797400	7.74	1.50333	5.30333	-2.36417	Down	1.81873	Up	MCM family protein.
Os05g0384300	0.926667	0.15	0.713333	-2.62709	Down	2.24961	Up	Peptidase aspartic catalytic domain containing protein.
Os12g0125500	3.00333	1.14	2.72	-1.39753	Down	1.25457	Up	Similar to MatE family protein expressed.
Os02g0786500	8.08667	0.89	4.03667	-3.18367	Down	2.18129	Up	Similar to PR-1a pathogenesis related protein (Hv-1a) precursor.
Os01g0716200	10.2667	3.98667	9.59667	-1.36471	Down	1.26735	Up	IQ calmodulin-binding region domain containing protein.
Os08g0553100	0.636667	0.116667	0.563333	-2.44815	Down	2.2716	Up	Hypothetical conserved gene.
Os07g0559700	71.3167	17.3333	46.6633	-2.04069	Down	1.42874	Up	Similar to Monosaccharide transporter 3.
Os02g0753300	192.237	40.8833	128.823	-2.2333	Down	1.65581	Up	Lipoxygenase LH2 domain containing protein.
Os08g0434566	0.356667	0.0633333	0.21	-2.49354	Down	1.72935	Up	Hypothetical gene.
Os06g0156600	46.18	9.62667	21.53	-2.26216	Down	1.16124	Up	Lipase GDSL domain containing protein.
Os07g0496700	1.92667	0.59	2.45	-1.70732	Down	2.05399	Up	Phosphate-induced protein 1 conserved region family protein.
Os01g0166500	10.62	2.29	4.86	-2.21336	Down	1.08561	Up	Conserved hypothetical protein.
Os02g0256100	2.81	0.343333	1.12333	-3.03289	Down	1.7101	Up	Pectin lyase fold/virulence factor domain containing protein.
Os06g0654300	5.04	1.71667	5.10333	-1.55381	Down	1.57183	Up	Similar to Histidine kinase (Fragment).
Os05g0138200	8.41667	0.846667	4.07	-3.31338	Down	2.26516	Up	Similar to Chitinase (Class II) (EC 3.2.1.14).
Os01g0545500	0.406667	0.001	0.346667	-8.6677	Down	8.43741	Up	Hypothetical conserved gene.
Os12g0533400	1.55	0.326667	1.2	-2.24638	Down	1.87714	Up	Similar to Rac GTPase activating protein 1.
Os01g0265100	60.8833	20.5267	56.0667	-1.56855	Down	1.44964	Up	Similar to ADP-ribosylation factor.
Os03g0279200	200.337	32.0233	147.657	-2.64523	Down	2.20505	Up	Similar to Histone H2A.
Os11g0291475	21.0933	5.24	10.9533	-2.00915	Down	1.06373	Up	Hypothetical protein.
Os12g0194600	3.24	0.653333	2.18667	-2.3101	Down	1.74284	Up	Similar to DNA binding protein.
Os02g0590400	14.4433	5.87333	14.9067	-1.29815	Down	1.34371	Up	Lecithin:cholesterol acyltransferase family protein.
Os08g0231400	124.653	17.33	49.43	-2.84658	Down	1.51212	Up	Germin-like protein 8-12 Disease resistance
Os12g0601300	47.0167	8.81667	28.81	-2.41487	Down	1.70826	Up	Similar to Auxin-responsive protein (Aux/IAA) (Fragment).
Os11g0546500	9.61	2.19333	5.25	-2.13141	Down	1.25919	Up	Galactosyl transferase family protein.
Os05g0532500	0.81	0.256667	0.803333	-1.65803	Down	1.6461	Up	Hypothetical conserved gene.
Os01g0544450	6.44667	1.56667	6.03333	-2.04086	Down	1.94526	Up	Similar to DNA replication licensing factor mcm4.
Os01g0190500	2.60667	0.573333	1.88	-2.18476	Down	1.71329	Up	IQ calmodulin-binding region domain containing protein.
Os12g0614100	1.64	0.001	0.213333	-10.6795	Down	7.73697	Up	Similar to Lipase family protein.
Os06g0725500	1.27	0.106667	2.25667	-3.57365	Down	4.40301	Up	Protein of unknown function DUF241 plant family protein.
MSTRG.31747	1.23	0.24	1.23667	-2.35755	Down	2.36535	Up	--
Os01g0296450	8.23333	1.05667	4.62333	-2.96196	Down	2.12941	Up	Hypothetical protein.
Os04g0308400	14.18	0.996667	29.82	-3.8306	Down	4.90303	Up	Similar to H0211A12.13 protein.
Os01g0242200	5.04333	1.06333	2.53667	-2.24578	Down	1.25434	Up	Zinc finger C2H2-type domain containing protein.
Os01g0264600	1.60333	0.0433333	0.406667	-5.20945	Down	3.2303	Up	Conserved hypothetical protein.
Os06g0104300	12.8533	4.86	9.92333	-1.40311	Down	1.02987	Up	Similar to Pectinesterase-like protein.
Os08g0115200	8.73	1.22333	4.80667	-2.83516	Down	1.97422	Up	IQ calmodulin-binding region domain containing protein.
Os10g0110425	0.38	0.001	0.38	-8.56986	Down	8.56986	Up	Hypothetical protein.
Os12g0638100	4.11	0.86	2.72	-2.25673	Down	1.6612	Up	Similar to Receptor-like protein kinase.
Os04g0563700	8.59	2.60333	7.76333	-1.7223	Down	1.57632	Up	Cyclin.
MSTRG.33487	1.71333	0.51	1.24	-1.74824	Down	1.28177	Up	Histidine protein methyltransferase 1-like protein [Dichanthelium oligosanthes]
Os07g0601600	10.06	0.21	3.77333	-5.5821	Down	4.16738	Up	Similar to VEP1 (VEIN PATTERNING 1)%3B binding / catalytic.
Os01g0756900	16.26	3.15333	23.3667	-2.36638	Down	2.8895	Up	Hypothetical protein.
Os10g0552200	17.2733	0.603333	18.7767	-4.83945	Down	4.95984	Up	Plant lipid transfer protein and hydrophobic protein helical domain containing protein.
Os02g0767800	0.78	0.253333	1.37667	-1.62244	Down	2.44207	Up	Similar to DNA binding protein.
Os03g0438200	3.11	1.41	3.30333	-1.14122	Down	1.22823	Up	Conserved hypothetical protein.
Os04g0583600	73.8733	13.54	48.7167	-2.44783	Down	1.84719	Up	Similar to Histone H4.
Os01g0758500	4.79	1.38333	5.23	-1.79188	Down	1.91866	Up	Similar to predicted protein.
Os01g0594300	20.9433	5.89	12.8067	-1.83015	Down	1.12056	Up	Similar to leucine-rich repeat family protein / extensin family protein.
Os11g0661900	7.38333	3.56667	7.62	-1.0497	Down	1.09521	Up	Conserved hypothetical protein.
Os03g0297850	1.94	0.28	1.42	-2.79256	Down	2.34239	Up	Hypothetical protein.
Os02g0258200	26.87	5.68333	17.23	-2.24119	Down	1.60011	Up	Similar to high mobility group family.
Os07g0243200	1.44	0.516667	1.15	-1.47876	Down	1.15433	Up	Plastidic large subunit of ADP-glucose pyrophosphorylase (AGP) Starch synthesis in rice pollen
Os06g0253600	2.82667	1.03667	3.41667	-1.44715	Down	1.72064	Up	Similar to secretory protein-like.
Os09g0482761	18.2567	3.99333	14.71	-2.19276	Down	1.88113	Up	Conserved hypothetical protein.
Os05g0387700	10.5833	3.18667	6.43333	-1.73167	Down	1.01352	Up	Protein kinase core domain containing protein.
Os02g0817500	47.5033	16.2867	45.5467	-1.54434	Down	1.48365	Up	Potassium channel voltage-dependent beta subunit KCNAB-related domain containing protein.
Os08g0101100	16.7033	2.66	12.4133	-2.65064	Down	2.22239	Up	High mobility group HMG1/HMG2 domain containing protein.
Os02g0710700	1.16	0.133333	1.15	-3.12102	Down	3.10852	Up	Hypothetical conserved gene.
Os05g0107101	13.7067	0.856667	4.02	-4	Down	2.23039	Up	Conserved hypothetical protein.
Os01g0222500	13.0833	6.50333	13.86	-1.00848	Down	1.09168	Up	Similar to Vacuolar ATP synthase subunit E (EC 3.6.3.14) (V-ATPase E subunit) (Vacuolar proton pump E subunit).
Os12g0604700	7.14667	2.89667	6.82	-1.30288	Down	1.23538	Up	Similar to LSTK-1-like kinase.
Os04g0604800	2.06333	0.333333	2.39	-2.62994	Down	2.84197	Up	Similar to OSIGBa0118P15.11 protein.
Os12g0590500	1.47333	0.2	1	-2.88101	Down	2.32193	Up	Similar to Kinesin motor domain containing protein expressed.
Os08g0194900	0.543333	0.01	0.28	-5.76377	Down	4.80735	Up	Hypothetical conserved gene.
Os07g0693100	0.76	0.0166667	0.316667	-5.51096	Down	4.24793	Up	Similar to Pyruvate decarboxylase isozyme 3 (EC 4.1.1.1) (PDC).
Os04g0379933	0.6	0.22	0.693333	-1.44746	Down	1.65605	Up	Hypothetical conserved gene.
Os08g0512600	21.89	10.3767	20.8533	-1.07693	Down	1.00693	Up	B-type plant-specific cyclin-dependent kinase DNA damage response
Os02g0756600	17.6367	3.26	10.6667	-2.43563	Down	1.71017	Up	Similar to Phi-1 protein.
Os06g0228200	51.9933	2.36333	25.47	-4.45943	Down	3.4299	Up	Aquaporin NIP III subfamily protein Aquaporin Silicon influx transporter Water transport
Os04g0474800	264.457	120.083	267.203	-1.139	Down	1.1539	Up	Similar to OSIGBa0135C13.7 protein.
Os01g0750300	84.13	41.64	84.9333	-1.01465	Down	1.02836	Up	Similar to Cellulose synthase (Fragment).
Os05g0542900	42.03	12.0667	34.3933	-1.80039	Down	1.5111	Up	Pectin lyase fold domain containing protein.
Os04g0585100	4.25	1.3	4.13333	-1.70895	Down	1.66879	Up	Zinc finger DHHC-type domain containing protein.
Os12g0443500	244.12	96.8	232.093	-1.33451	Down	1.26163	Up	Similar to UDP-glucose 6-dehydrogenase (EC 1.1.1.22) (UDP-Glc dehydrogenase) (UDP-GlcDH) (UDPGDH).
Os03g0285300	21.1967	2.65667	8.79667	-2.99615	Down	1.72734	Up	Conserved hypothetical protein.
Os03g0106400	5.05667	1.82	5.12333	-1.47425	Down	1.49314	Up	Similar to Branched-chain-amino-acid aminotransferase 5 chloroplast precursor (EC 2.6.1.42) (Atbcat-5).
Os01g0147800	0.21	0.001	0.18	-7.71425	Down	7.49185	Up	Domain of unknown function DUF547 domain containing protein.
Os01g0685900	8.19333	2.07333	6.04	-1.9825	Down	1.5426	Up	Similar to 65kD microtubule associated protein.
Os05g0210500	0.8	0.133333	0.93	-2.58496	Down	2.80219	Up	Timeless protein domain containing protein.
Os09g0383300	5.89333	2.27	4.79333	-1.37639	Down	1.07834	Up	Hypothetical conserved gene.
Os05g0332300	10.7533	2.48667	5.63	-2.1125	Down	1.17892	Up	Similar to CBL-interacting protein kinase 2.
Os06g0681600	65.07	14.0067	47.5633	-2.21588	Down	1.76374	Up	Haem peroxidase family protein.
Os12g0548501	87.84	19.16	101.92	-2.19678	Down	2.41127	Up	Similar to CI2C.
Os07g0642800	3.56333	0.566667	1.28	-2.65266	Down	1.17557	Up	Similar to plectin-related.
Os03g0117300	17.7467	6.53	16.2367	-1.44239	Down	1.3141	Up	Beta-glucanase family protein.
Os04g0495400	42.7533	6.33	21.79	-2.75576	Down	1.78339	Up	DOMON domain containing protein.
Os03g0836800	46.4567	1.12667	42.03	-5.36575	Down	5.22129	Up	Similar to IAA-amino acid hydrolase 1 (EC 3.5.1.-).
Os12g0555600	8.14667	2.00667	6.57667	-2.02141	Down	1.71256	Up	Cellulose synthase-like protein Cell wall biosynthesis
Os07g0600700	25.54	7.14333	25.75	-1.83809	Down	1.8499	Up	X8 domain containing protein.
Os12g0484900	3.85	0.443333	1.83	-3.11839	Down	2.04538	Up	Similar to Growth-regulating factor 7.
Os05g0516700	14.64	6.72667	17.56	-1.12195	Down	1.38433	Up	Conserved hypothetical protein.
Os07g0145400	3.56667	0.646667	1.79333	-2.46348	Down	1.47155	Up	Protein kinase core domain containing protein.
Os06g0177600	0.42	0.00333333	0.44	-6.97728	Down	7.04439	Up	2OG-Fe(II) oxygenase domain containing protein.
Os04g0357300	0.436667	0.0866667	0.426667	-2.33298	Down	2.29956	Up	Similar to Helicase-like protein [Oryza sativa (japonica cultivar-group)].
Os12g0163700	8.23333	0.523333	2.17	-3.97567	Down	2.05189	Up	Similar to Actin 7 (Actin 2).
Os11g0181400	9.92	2.84	8.66333	-1.80445	Down	1.60903	Up	Similar to barley mlo defense gene homolog4.
Os04g0506300	2.33667	0.973333	2.21333	-1.26345	Down	1.18521	Up	TMS membrane protein/tumour differentially expressed protein family protein.
Os12g0167700	2.74	0.783333	1.66667	-1.80648	Down	1.08927	Up	Similar to SAP domain containing protein expressed.
Os06g0725700	7.68667	1.34	6.36333	-2.52013	Down	2.24755	Up	Protein of unknown function DUF241 plant family protein.
Os11g0257700	2.89333	0.216667	1.54333	-3.73918	Down	2.8325	Up	Similar to SAM dependent carboxyl methyltransferase.
Os06g0247900	25.2867	7.69333	42.5533	-1.7167	Down	2.46759	Up	Similar to Endo-beta-1 4-glucanase precursor (EC 3.2.1.4).
Os02g0164000	2.76333	0.776667	2.74	-1.83104	Down	1.81881	Up	Peptidase C48 SUMO/Sentrin/Ubl1 domain containing protein.
Os04g0423400	7.41333	2.29	13.2467	-1.69477	Down	2.53221	Up	Similar to OSIGBa0076I14.3 protein.
Os12g0601000	2.84333	0.396667	2.04667	-2.84158	Down	2.36728	Up	Similar to Leucine Rich Repeat family protein expressed.
Os03g0144500	2.15333	0.393333	1.84	-2.45275	Down	2.22588	Up	Similar to Xyloglucan galactosyltransferase KATAMARI 1 (EC 2.4.1.-) (MURUS3 protein).
Os01g0769700	11.86	3.06667	12.3667	-1.95136	Down	2.01171	Up	Receptor-like kinase Control of reproductive growth and development Repression of cell death
Os02g0102200	3.54	1.39667	3.44333	-1.34176	Down	1.30182	Up	Similar to Transmembrane amino acid transporter protein.
Os03g0736500	20.4233	5.48667	19.97	-1.89622	Down	1.86383	Up	Syntaxin-related protein KNOLLE (Syntaxin 111) (AtSYP111).
Os04g0125700	9.62	1.17667	3.20333	-3.03133	Down	1.44487	Up	Concanavalin A-like lectin/glucanase domain containing protein.
Os03g0699700	37.5233	3.45667	14.0133	-3.44033	Down	2.01935	Up	9-lipoxigenase.
Os06g0127800	6.79667	1.03667	6.5	-2.71288	Down	2.64849	Up	GAI-RGA-SCR (GRAS) family protein Brassinosteroid signaling
Os11g0644700	2.66333	0.503333	1.62333	-2.40365	Down	1.68937	Up	Plant disease resistance response protein family protein.
Os02g0520100	6.01667	2.69667	8.97	-1.15779	Down	1.73393	Up	NUDIX hydrolase domain containing protein.
Os07g0105000	119.757	6.77667	51.97	-4.14339	Down	2.93903	Up	Cupredoxin domain containing protein.
Os12g0139300	5.61667	1.89	4.20333	-1.57133	Down	1.15315	Up	Similar to Cytochrome P450 90A1 (EC 1.14.-.-).
Os09g0466100	9.95333	2.29	5.99	-2.11983	Down	1.38721	Up	Cyclin A/B/D/E domain containing protein.
Os01g0215700	1.01333	0.0233333	1.36667	-5.44057	Down	5.87213	Up	Esterase SGNH hydrolase-type domain containing protein.
Os12g0614201	7.64333	0.001	1.49667	-12.9	Down	10.5475	Up	Conserved hypothetical protein.
Os03g0772600	11.4333	4.65667	12.94	-1.29588	Down	1.47447	Up	Similar to Lectin-like receptor kinase 7%3B2.
Os07g0520800	8.6	1.73333	4.45	-2.31079	Down	1.36026	Up	Ankyrin repeat-containing domain domain containing protein.
Os04g0524600	17.42	7.43333	16.54	-1.22866	Down	1.15388	Up	Oligopeptide transporter OPT superfamily protein.
Os12g0547500	2.06	0.53	1.81333	-1.95858	Down	1.77458	Up	Kinesin-14 family member Non-processive minus-end-directed motor protein that transports actin filaments along microtubules Organization of the cytoskeletal architecture Cell elongation and division
Os04g0107300	4.49667	1.57667	4.52667	-1.51198	Down	1.52157	Up	NAD(P)-binding domain containing protein.
Os01g0233100	2.29	0.546667	1.69667	-2.06661	Down	1.63397	Up	Similar to Cyclin-A1-2.
Os02g0122700	1.43667	0.2	1.05	-2.84465	Down	2.39232	Up	Similar to SET domain protein.
Os01g0140100	28.8433	8.89667	21.7533	-1.6969	Down	1.2899	Up	Peptidase A1 domain containing protein.
Os03g0162300	0.263333	0.001	0.323333	-8.04075	Down	8.33688	Up	Conserved hypothetical protein.
Os09g0400200	2.52333	0.266667	1.58333	-3.24222	Down	2.56986	Up	Similar to Cinnamyl alcohol dehydrogenase (EC 1.1.1.195).
Os03g0338400	15.09	3.92667	18.8367	-1.94222	Down	2.26217	Up	Basic helix-loop-helix dimerisation region bHLH domain containing protein.
Os10g0550750	0.866667	0.196667	0.773333	-2.13972	Down	1.97534	Up	Protein of unknown function DUF3527 domain containing protein.
Os01g0205900	9.28333	0.78	7.83667	-3.5731	Down	3.32869	Up	Similar to Class III peroxidase GvPx2b (Fragment).
Os02g0321600	5.42	0.516667	1.58333	-3.39099	Down	1.61566	Up	Conserved hypothetical protein.
Os01g0759900	6.23667	2.02333	4.58667	-1.62404	Down	1.18071	Up	Similar to Permease 1.
Os10g0439100	6.06	0.54	3.22333	-3.48829	Down	2.57752	Up	Similar to cDNA clone:002-180-G03 full insert sequence.
Os02g0178700	3.11333	0.373333	1.67333	-3.05992	Down	2.16419	Up	Helix-loop-helix DNA-binding domain containing protein.
Os10g0566800	3.18333	0.43	2.39667	-2.88813	Down	2.47862	Up	Haem peroxidase plant/fungal/bacterial family protein.
Os08g0519100	22.8667	4.18333	13.98	-2.45052	Down	1.74064	Up	D-arabinono-1 4-lactone oxidase domain containing protein.
Os01g0896400	26.5033	5.78	22.94	-2.19703	Down	1.98872	Up	Similar to JHL23J11.5 protein.
Os01g0745400	4.40333	0.85	3.3	-2.37306	Down	1.95693	Up	Sec34-like protein family protein.
Os07g0591100	6.58667	2.66667	5.67667	-1.30451	Down	1.09001	Up	Protein of unknown function DUF620 family protein.
Os10g0512450	0.546667	0.0366667	1.04667	-3.89812	Down	4.83519	Up	Hypothetical protein.
Os03g0210500	13.0467	2.72667	9.03333	-2.25847	Down	1.72812	Up	Protein of unknown function DUF538 family protein.
Os02g0198400	3.21	1.01	2.3	-1.66822	Down	1.18728	Up	Similar to predicted protein.
Os03g0369600	4.58667	0.58	2.73	-2.98332	Down	2.23478	Up	Similar to Class III peroxidase 48.
Os02g0705300	12.5967	5.09667	10.2833	-1.30542	Down	1.01268	Up	Tubby-like protein 2.
Os05g0563550	65.9967	9.72333	77.5067	-2.76287	Down	2.9948	Up	FAS1 domain domain containing protein.
Os04g0649200	1.19667	0.366667	0.913333	-1.70648	Down	1.31667	Up	Similar to H0212B02.1 protein.
Os04g0467901	3.91667	0.876667	2.43	-2.15953	Down	1.47086	Up	Plant-specific kinesin-14 Processive minus-end-directed microtubule motor
Os01g0108800	3.45	1.16667	2.93	-1.5642	Down	1.32851	Up	Protein of unknown function DUF936 plant family protein.
Os03g0187800	56.02	15.3533	41.2833	-1.86739	Down	1.42701	Up	Protein of unknown function DUF250 domain containing protein.
Os02g0714200	28.9533	6.13667	23.0533	-2.2382	Down	1.90945	Up	Similar to Pyrophosphate--fructose 6-phosphate 1-phosphotransferase alpha subunit (EC 2.7.1.90) (PFP) (6-phosphofructokinase pyrophosphate dependent) (Pyrophosphate-dependent 6-phosphofructose-1-kinase) (PPi-PFK).
Os01g0309100	14.9833	4.07	19.9033	-1.88026	Down	2.28991	Up	Similar to anther-specific protein SF18.
Os06g0212100	9.76333	0.866667	4.29667	-3.49382	Down	2.30967	Up	Similar to Galactoside 2-alpha-L-fucosyltransferase (EC 2.4.1.69) (Xyloglucan alpha-(1 2)-fucosyltransferase) (PsFT1).
Os01g0896300	3.31333	0.783333	2.17333	-2.08059	Down	1.47221	Up	Hypothetical conserved gene.
Os01g0680950	11.5267	4.45	8.96	-1.3731	Down	1.00969	Up	Hypothetical gene.
Os09g0107400	4.03	1.41	4.65	-1.51508	Down	1.72154	Up	Hypothetical conserved gene.
Os04g0464100	0.9	0.29	1.87667	-1.63387	Down	2.69405	Up	Heavy metal transport/detoxification protein domain containing protein.
Os12g0224400	1.01333	0.04	0.646667	-4.66297	Down	4.01495	Up	Similar to Exostosin family protein expressed.
Os06g0611300	2.28333	0.103333	1.63667	-4.46576	Down	3.98538	Up	Conserved hypothetical protein.
Os08g0260400	1.33333	0.176667	1.05333	-2.91594	Down	2.57586	Up	Conserved hypothetical protein.
Os10g0160100	13.04	2.18333	13.7133	-2.57834	Down	2.65097	Up	Glycoside hydrolase family 17 protein.
Os06g0514100	27.1433	3.34333	57.9667	-3.02124	Down	4.11586	Up	Conserved hypothetical protein.
Os11g0484700	7.07	0.106667	5.40667	-6.05053	Down	5.66356	Up	Bifunctional inhibitor/plant lipid transfer protein/seed storage domain containing protein.
Os08g0459300	17.5267	5.93667	17.95	-1.56183	Down	1.59626	Up	Conserved hypothetical protein.
Os09g0338500	29.99	4.76333	20.37	-2.65444	Down	2.0964	Up	Similar to Desaturase/cytochrome b5 protein.
Os12g0104400	15.0433	1.66333	12.6233	-3.17698	Down	2.92394	Up	Fatty acid desaturase type 1 domain containing protein.
Os09g0452400	1.38333	0.346667	1.47333	-1.99653	Down	2.08746	Up	Peptidase A1 domain containing protein.
Os03g0577100	3.33	0.906667	2.63667	-1.87688	Down	1.54007	Up	Nuf2 family protein.
Os05g0457600	0.38	0.0333333	0.503333	-3.51096	Down	3.91648	Up	Similar to Avr9/Cf-9 rapidly elicited protein 137.
Os05g0406800	6.05	1.41667	4.85333	-2.09443	Down	1.77648	Up	Leucine-rich repeat N-terminal domain containing protein.
Os01g0385400	2.82333	0.903333	2.23667	-1.64407	Down	1.30802	Up	C4-dicarboxylate transporter/malic acid transport protein family protein.
Os10g0109900	5.27	1.02333	2.53333	-2.36453	Down	1.30776	Up	Major facilitator superfamily general substrate transporter domain containing protein.
Os01g0936900	1.69333	0.476667	2.92	-1.82881	Down	2.61492	Up	Peptidase A1 domain containing protein.
Os05g0431700	21.7633	7.03667	19.21	-1.62894	Down	1.44889	Up	Similar to peptide transporter PTR2-B.
Os04g0641700	4.80333	0.52	4.33667	-3.20745	Down	3.06	Up	Similar to H0423H10.4 protein.
Os02g0807900	4.76	0.743333	2.74333	-2.67888	Down	1.88385	Up	Conserved hypothetical protein.
Os05g0478300	3.69333	0.96	2.47333	-1.94382	Down	1.36535	Up	Hypothetical conserved gene.
Os05g0582000	9.88667	1.36667	5.13667	-2.85482	Down	1.91017	Up	Plant Basic Secretory Protein domain containing protein.
Os06g0112100	125.197	32.0733	147.083	-1.96475	Down	2.19719	Up	Nucleoside phosphorylase family 1 domain containing protein.
Os03g0171300	4.37333	0.816667	4.12333	-2.42091	Down	2.33599	Up	Similar to DNA-binding protein-like.
Os02g0699433	12.14	3.41	7.79667	-1.83192	Down	1.19309	Up	Hypothetical conserved gene.
Os08g0434632	5.22	1.16333	3.91667	-2.16579	Down	1.75136	Up	Conserved hypothetical protein.
Os02g0814300	13.2933	2.27667	13.5033	-2.54571	Down	2.56832	Up	Cytochrome c monohaem domain containing protein.
Os08g0266700	0.816667	0.0966667	0.463333	-3.07866	Down	2.26096	Up	Rad21/Rec8 like protein C-terminal domain containing protein.
Os03g0368000	19.16	0.593333	4.42	-5.01311	Down	2.89713	Up	Similar to Peroxidase 1.
Os03g0773000	16.3833	5.76	14.2033	-1.50809	Down	1.30209	Up	Protein of unknown function DUF1005 family protein.
Os03g0196000	12.6467	1.93	7.78333	-2.71208	Down	2.01179	Up	Similar to Sulfate transporter.
Os02g0219200	11.0267	2.93667	6.93667	-1.90875	Down	1.24006	Up	Similar to Beta-galactosidase precursor (EC 3.2.1.23) (Lactase) (Acid beta- galactosidase) (Exo-(1-->4)-beta-D-galactanase).
Os07g0603300	5.22	2.28667	6.59667	-1.1908	Down	1.52849	Up	TON1 RECRUIT MOTIF (TRM)-containing protein Regulation of grain size and shape
Os01g0280200	1.83667	0.446667	1.22333	-2.03982	Down	1.45355	Up	IQ motif EF-hand binding site domain containing protein.
Os02g0613900	2.18	0.52	3.21333	-2.06774	Down	2.62749	Up	Similar to Adenine phosphoribosyltransferase 2 (EC 2.4.2.7) (APRT).
Os03g0727600	1.05667	0.256667	2.61667	-2.04155	Down	3.34976	Up	ACC synthase Ethylene biosynthesis
Os06g0180100	6.12	0.223333	2.31	-4.77626	Down	3.37062	Up	Hypothetical conserved gene.
Os09g0548200	7.11	0.996667	5.72333	-2.83467	Down	2.52167	Up	Peptidoglycan-binding Lysin subgroup domain containing protein.
Os06g0577350	0.863333	0.0466667	0.51	-4.20945	Down	3.45003	Up	Hypothetical protein.
Os11g0503900	10.7667	4.00667	12.8567	-1.4261	Down	1.68204	Up	Sulfotransferase family protein.
Os03g0822400	4.81667	1.55667	3.57333	-1.62958	Down	1.19881	Up	Conserved hypothetical protein.
Os07g0201300	2.24667	0.693333	2.16667	-1.69617	Down	1.64386	Up	UDP-glucuronosyl/UDP-glucosyltransferase domain containing protein.
Os01g0705750	3.10333	1.48	3.65	-1.06822	Down	1.3023	Up	Hypothetical protein.
Os04g0463000	5.96	1.13333	2.87333	-2.39474	Down	1.34215	Up	Serine/threonine protein kinase domain containing protein.
Os01g0653100	1.58667	0.55	1.90333	-1.5285	Down	1.79102	Up	Conserved hypothetical protein.
Os06g0131700	11.51	2.99	7.71333	-1.94467	Down	1.36721	Up	Similar to NAM protein.
Os06g0187500	1.16333	0.403333	1.28333	-1.52822	Down	1.66985	Up	Hypothetical conserved gene.
Os08g0560300	7.98	1.99	5.82667	-2.00362	Down	1.5499	Up	Protein of unknown function DUF597 family protein.
Os12g0164600	0.27	0.001	0.286667	-8.07682	Down	8.16323	Up	Protein of unknown function DUF793 family protein.
Os12g0107700	3.54	0.816667	2.92333	-2.11593	Down	1.8398	Up	Similar to Leucine Rich Repeat family protein expressed.
Os09g0482780	24.47	7.17333	20.84	-1.7703	Down	1.53864	Up	FAS1 domain domain containing protein.
Os04g0553650	5.81667	0.273333	2.66667	-4.41146	Down	3.2863	Up	Similar to Pectinesterase.
Os03g0258900	18.0967	0.47	2.43	-5.26692	Down	2.37022	Up	Galactose oxidase beta-propeller domain containing protein.
Os01g0952800	176.343	5.23667	15.0867	-5.07359	Down	1.52655	Up	Achaete-scute transcription factor related domain containing protein.
Os06g0604300	8.46333	1.03333	11.7467	-3.03392	Down	3.50687	Up	Chloroplast-localized phospholipase D Herbivore defense
Os10g0132500	3.61333	0.62	1.55333	-2.54299	Down	1.32503	Up	Hypothetical conserved gene.
Os05g0161800	34.49	8.46667	54.8967	-2.02631	Down	2.69685	Up	RelA/SpoT domain containing protein.
Os01g0294700	398.743	64.3367	232.39	-2.63175	Down	1.85283	Up	Haem peroxidase plant/fungal/bacterial family protein.
Os04g0223901	1.70333	0.426667	1.12667	-1.99718	Down	1.40088	Up	Dimethylaniline monooxygenase N-oxide-forming domain containing protein.
Os11g0107600	9.26	3.42667	11.02	-1.43421	Down	1.68525	Up	Similar to prenylated Rab receptor 2.
Os03g0103300	22.0067	2.39	11.8367	-3.20286	Down	2.30818	Up	Hybrid proline- or glycine-rich protein Controll of low-temperature germinability Pre-harvest sprouting resistance
Os05g0556400	52.2967	22.6667	51.8733	-1.20615	Down	1.19442	Up	DOMON related domain containing protein.
Os06g0159450	60.1967	12.3933	39.1667	-2.28012	Down	1.66006	Up	Similar to Histone H3.
Os03g0288900	3.94	1.08667	2.54667	-1.85829	Down	1.2287	Up	Hypothetical protein.
Os10g0552800	732.217	43.5933	334.62	-4.07009	Down	2.94034	Up	Similar to Tfm5 protein.
Os06g0289900	1.08333	0.343333	2.02667	-1.6578	Down	2.56143	Up	UDP-glucuronosyl/UDP-glucosyltransferase family protein.
Os03g0667500	6.06	1.22667	4.24	-2.30457	Down	1.78932	Up	Similar to Metal transport protein.
Os06g0695200	2.37	0.703333	2.27667	-1.75261	Down	1.69464	Up	Similar to Peroxidase precursor (EC 1.11.1.7).
Os05g0371600	1.01333	0.153333	0.656667	-2.72437	Down	2.09849	Up	Similar to BRASSINOSTEROID INSENSITIVE 1-associated receptor kinase 1.
Os04g0326100	0.156667	0.00333333	0.543333	-5.55459	Down	7.34873	Up	Similar to H0107B07.2 protein.
Os02g0192700	8.46667	3.7	8.78	-1.19427	Down	1.2467	Up	Similar to Thioredoxin peroxidase.
Os11g0210100	1.56	0.001	0.63	-10.6073	Down	9.29921	Up	Similar to Class III peroxidase 133.
Os03g0807100	11.8933	3.35667	8.87	-1.82505	Down	1.4019	Up	Protein of unknown function DUF239 domain containing protein.
Os08g0137400	3.33	0.206667	1.30333	-4.01014	Down	2.65683	Up	Cupredoxin domain containing protein.
Os04g0319800	0.576667	0.11	2.20333	-2.39023	Down	4.32411	Up	Similar to Cytokinin-O-glucosyltransferase 2 (EC 2.4.1.-) (Zeatin O- glucosyltransferase 2).
Os05g0160800	2.29667	0.236667	1.15333	-3.27861	Down	2.28488	Up	Similar to DNA polymerase epsilon subunit 2.
Os04g0479000	1.18667	0.3	0.893333	-1.98388	Down	1.57424	Up	Similar to OSIGBa0116M22.9 protein.
Os04g0639100	7.03667	1.59	5.45667	-2.14587	Down	1.77899	Up	Conserved hypothetical protein.
Os09g0248900	9.10667	2.97333	7.15	-1.61484	Down	1.26586	Up	Myb/SANT-like domain domain containing protein.
Os01g0176500	6.66333	1.63667	5.69667	-2.02548	Down	1.79936	Up	Conserved hypothetical protein.
Os12g0169100	5.62	2.21667	4.58333	-1.34218	Down	1.04801	Up	Protein of unknown function DUF869 plant family protein.
Os04g0446401	3.78333	0.876667	3.65	-2.10956	Down	2.0578	Up	Conserved hypothetical protein.
MSTRG.17505	1.32667	0.28	1.11667	-2.24431	Down	1.9957	Up	PREDICTED: universal stress protein PHOS32 [Eucalyptus grandis]
Os08g0469500	1.82	0.306667	1.95667	-2.5692	Down	2.67365	Up	Similar to F-box domain containing protein.
Os09g0539400	1.66333	0.27	1.42333	-2.62305	Down	2.39824	Up	Similar to MCM10 minichromosome maintenance deficient 10.
Os10g0333000	1.37667	0.44	1.22333	-1.6456	Down	1.47524	Up	Hypothetical conserved gene.
Os10g0530600	3.21667	1.35667	4.84333	-1.2455	Down	1.83593	Up	Similar to Glutathione S-transferase GST 20 (EC 2.5.1.18).
Os11g0120200	1.56	0.516667	1.33333	-1.59424	Down	1.36773	Up	Protein of unknown function DUF936 plant family protein.
MSTRG.31662	15.5033	0.183333	1.90333	-6.40197	Down	3.37599	Up	--
Os06g0160000	45.69	8.95667	42.1667	-2.35084	Down	2.23507	Up	Hypothetical protein.
Os10g0508000	1.08	0.06	0.406667	-4.16993	Down	2.76081	Up	Similar to C-terminal peptide-binding protein 1.
Os10g0117000	0.613333	0.143333	0.413333	-2.0973	Down	1.52793	Up	Similar to predicted protein.
Os01g0513900	4.50333	0.923333	3	-2.28607	Down	1.70004	Up	Similar to Kinesin heavy chain (Fragment).
Os05g0543100	13.8967	3.71	9.11667	-1.90525	Down	1.29709	Up	Similar to Clathrin coat assembly protein AP47 (Clathrin coat associated protein AP47) (Golgi adaptor AP-1 47 kDa protein) (HA1 47 kDa subunit) (Clathrin assembly protein assembly protein complex 1 medium chain) (Uncoordinated protein 101).
Os10g0418000	24.38	6.72667	16.3867	-1.85773	Down	1.28456	Up	Similar to Histone H2A.
Os07g0498400	19.6567	6.32	14.1667	-1.63702	Down	1.1645	Up	Leucine-rich repeat typical subtype domain containing protein.
Os08g0414200	0.88	0.326667	0.83	-1.42968	Down	1.34529	Up	Zinc finger RING/FYVE/PHD-type domain containing protein.
Os10g0552600	161.5	19.0333	99.64	-3.08493	Down	2.3882	Up	Similar to Tfm5 protein.
Os03g0374500	9.33	1.10333	3.52	-3.08001	Down	1.67371	Up	Similar to calmodulin-binding family protein.
Os07g0104366	13.5	1.61333	6.58667	-3.06484	Down	2.0295	Up	Hypothetical protein.
Os01g0740300	19.64	2.76667	7.93333	-2.82757	Down	1.51978	Up	Hypothetical protein.
Os06g0116200	5.99333	2.42333	5.09667	-1.30637	Down	1.07256	Up	Transcription factor
Os11g0155500	2.43333	1.03333	2.29667	-1.23563	Down	1.15224	Up	Similar to Amino acid permease family protein expressed.
Os02g0605900	30.05	13.7433	35.9567	-1.12863	Down	1.38753	Up	Similar to Chitinase (EC 3.2.1.14) A.
Os03g0652000	7.08667	0.833333	6.07333	-3.08814	Down	2.86552	Up	C2 domain containing protein.
Os04g0685000	0.573333	0.0766667	1.89	-2.9027	Down	4.62364	Up	Protein of unknown function DUF623 plant domain containing protein.
Os08g0509400	13.52	5.3	12.41	-1.35103	Down	1.22744	Up	Similar to Amygdalin hydrolase isoform AH I precursor (EC 3.2.1.117).
Os06g0683900	6.39	2.61	5.99667	-1.29177	Down	1.20011	Up	Similar to OSIGBa0115M15.5 protein.
Os08g0302000	4.32333	0.183333	1.01667	-4.5596	Down	2.47131	Up	Similar to Peroxidase 40 precursor (EC 1.11.1.7) (Atperox P40).
Os11g0431700	9.49667	2.94333	6.43667	-1.68997	Down	1.12886	Up	Similar to Serine carboxypeptidase.
Os07g0235700	0.3	0.01	0.326667	-4.90689	Down	5.02975	Up	Similar to cDNA clone:J023006M12 full insert sequence.
Os06g0614400	17.58	2.46333	17.4633	-2.83525	Down	2.82565	Up	Conserved hypothetical protein.
Os11g0138950	17.5267	0.993333	3.86667	-4.14113	Down	1.96074	Up	Hypothetical gene.
Os05g0478400	0.51	0.0233333	0.336667	-4.45003	Down	3.85086	Up	Similar to WRKY transcription factor 48.
Os01g0805900	153.027	34.6567	176.74	-2.14258	Down	2.35042	Up	Tubulin beta-2 chain (Beta-2 tubulin).
Os05g0507000	24.07	5.83667	23.1367	-2.04402	Down	1.98696	Up	Similar to JHL23J11.5 protein.
Os12g0609600	3.9	0.406667	1.80667	-3.26156	Down	2.15141	Up	Auxin responsive SAUR protein domain containing protein.
Os10g0351500	2.01	0.11	1.38	-4.19162	Down	3.64909	Up	Tyrosine protein kinase domain containing protein.
Os04g0310100	10.6833	0.676667	22.63	-3.98077	Down	5.06365	Up	Similar to H0211A12.12 protein.
Os01g0248300	49.3567	2.47	8.51	-4.32066	Down	1.78465	Up	Similar to Pathogen-related protein.
Os07g0616200	6.17333	1.05667	5.45667	-2.54653	Down	2.3685	Up	Similar to Beta-ketoacyl-ACP synthase.
Os06g0160100	48.4467	8.18667	36.45	-2.56505	Down	2.15457	Up	Similar to Histones H3 and H4 (ISS).
Os07g0476900	2.69667	0.856667	2.32667	-1.65437	Down	1.44146	Up	Thioredoxin domain 2 containing protein.
Os02g0638200	3.96	0.71	2.97667	-2.47961	Down	2.06781	Up	Similar to OSIGBa0115K01-H0319F09.22 protein.
Os07g0639400	49.8333	6.72667	19.6233	-2.88915	Down	1.54461	Up	Similar to Peroxidase 1.
Os03g0672400	6.41	1.36667	4.18	-2.22966	Down	1.61284	Up	Conserved hypothetical protein.
MSTRG.20652	12.1867	2.31667	8.79	-2.39518	Down	1.92381	Up	--
Os01g0678400	0.806667	0.263333	0.943333	-1.61508	Down	1.84088	Up	Protein of unknown function DUF2921 domain containing protein.
Os09g0330700	0.49	0.136667	0.64	-1.84212	Down	2.22741	Up	Ankyrin repeat domain containing protein.
Os11g0278300	4.09333	0.606667	2.67667	-2.7543	Down	2.14146	Up	Hypothetical conserved gene.
Os12g0289600	6.06333	0.773333	3.63	-2.97095	Down	2.23081	Up	Conserved hypothetical protein.
Os11g0470600	14.75	5.32	14.7467	-1.47122	Down	1.47089	Up	Conserved hypothetical protein.
Os05g0552600	23.5833	3.28	9.55	-2.846	Down	1.5418	Up	Similar to root cap periphery gene2.
Os03g0778400	5.62667	1.65333	6.60667	-1.7669	Down	1.99854	Up	Similar to predicted protein.
Os08g0421800	4.12333	1.32	3.65333	-1.64327	Down	1.46868	Up	Similar to Mitogen-activated protein kinase kinase kinase 1 (EC 2.7.1.-) (Arabidospsis NPK1-related protein kinase 1). Splice isoform 1S.
Os03g0145050	15.31	0.673333	5.64667	-4.50701	Down	3.06801	Up	Hypothetical gene.
Os09g0286300	1.01333	0.133333	1.10333	-2.926	Down	3.04876	Up	Hypothetical conserved gene.
Os12g0242900	2.48667	0.563333	2.20333	-2.14215	Down	1.96763	Up	DNA polymerase alpha subunit B domain containing protein.
Os02g0285300	61.8767	2.98667	20.6167	-4.37279	Down	2.7872	Up	DREPP plasma membrane polypeptide family protein.
Os09g0417600	54.0233	2.06	8.34667	-4.71287	Down	2.01856	Up	WRKY transcription factor Transcriptional repressor Pathogen defense
Os03g0637800	1.38667	0.25	0.76	-2.47162	Down	1.60407	Up	Crinkly4 receptor-like kinase Epidermal cell differentiation Interlocking of the palea and lemma
Os02g0511901	3.42333	1.17667	2.59	-1.5407	Down	1.13825	Up	Similar to DNA polymerase.
Os03g0221500	14.2967	3.40667	11.2767	-2.06925	Down	1.72691	Up	Glycoside hydrolase family 17 protein.
Os07g0515200	0.75	0.186667	1.15333	-2.00643	Down	2.62727	Up	Conserved hypothetical protein.
Os04g0450701	23.6167	1.83667	12.9233	-3.68464	Down	2.81482	Up	Hypothetical protein.
Os12g0227500	14.4833	1.91	47.45	-2.92275	Down	4.63476	Up	Similar to Beta-glucosidase aggregating factor.
Os12g0114800	92.0833	5.00667	50.0067	-4.20102	Down	3.3202	Up	Similar to Lipid transfer protein.
Os01g0686300	0.893333	0.0933333	0.503333	-3.25873	Down	2.43105	Up	UDP-glucuronosyl/UDP-glucosyltransferase family protein.
Os12g0554800	7.37	1.45	4.24	-2.34561	Down	1.54801	Up	Similar to Polygalacturonase-like protein.
Os05g0480400	5.83667	1	3	-2.54514	Down	1.58496	Up	Serine/threonine protein kinase domain containing protein.
Os01g0736551	1.06333	0.486667	1.34	-1.12759	Down	1.46123	Up	Hypothetical gene.
Os06g0702500	12.98	6.41667	13.57	-1.01639	Down	1.08052	Up	Ribosomal protein S5 domain 2-type fold domain containing protein.
Os11g0475500	20.46	9.87333	24.4067	-1.0512	Down	1.30567	Up	Conserved hypothetical protein.
Os11g0539200	80.7833	5.7	59.5233	-3.82502	Down	3.38442	Up	Similar to Xyloglucan endotransglycosylase XET2 (Fragment).
Os06g0228500	4.99333	0.31	1.45333	-4.00966	Down	2.22903	Up	Amino acid transporter transmembrane domain containing protein.
Os04g0479900	1.54	0.446667	1.63667	-1.78566	Down	1.87349	Up	Conserved hypothetical protein.
Os05g0134400	387.727	183.71	395.293	-1.07761	Down	1.10549	Up	Haem peroxidase plant/fungal/bacterial family protein.
Os06g0291600	5.08667	1.7	3.47333	-1.58119	Down	1.03079	Up	Similar to Protein kinase G11A (EC 2.7.1.-) (Fragment).
Os06g0220300	17.34	1.94	6.01333	-3.15998	Down	1.63211	Up	Similar to Phi-1 protein.
Os03g0128300	16.8433	2.69	13.4267	-2.6465	Down	2.31942	Up	Conserved hypothetical protein.
Os08g0552000	1.16333	0.166667	0.703333	-2.80323	Down	2.07724	Up	Hypothetical conserved gene.
Os07g0211601	0.126667	0.0266667	0.25	-2.24793	Down	3.22882	Up	Hypothetical gene.
Os07g0663600	1.63667	0.383333	2.19333	-2.09409	Down	2.51645	Up	Short-chain dehydrogenase/reductase SDR domain containing protein.
Os10g0404900	9.33333	0.773333	3.55667	-3.59323	Down	2.20136	Up	Similar to HAHB-5 (Fragment).
Os07g0256700	6.82	0.59	2.00667	-3.53098	Down	1.76601	Up	Protein of unknown function DUF231 plant domain containing protein.
Os09g0538500	8.89333	1.48667	6.56333	-2.58064	Down	2.14235	Up	Similar to Male sterility MS5.
Os07g0205500	8.27	2.86333	5.95	-1.53019	Down	1.05519	Up	Protein of unknown function DUF239 plant domain containing protein.
Os08g0454600	2.58667	0.813333	2.61667	-1.66918	Down	1.68581	Up	Hypothetical protein.
Os03g0234900	27.47	2.63	11.9133	-3.38472	Down	2.17944	Up	Similar to Peroxidase (EC 1.11.1.7).
Os12g0441600	3.46667	0.513333	1.63667	-2.75558	Down	1.67279	Up	O-methyltransferase family 2 domain containing protein.
Os04g0517000	19.6	3.35	15.97	-2.54862	Down	2.25313	Up	Similar to OSIGBa0145M07.3 protein.
Os08g0490900	82.0467	16.9833	48.9067	-2.27233	Down	1.52591	Up	Similar to Histone H2B.2.
Os12g0621700	4.24333	1.76333	4.01667	-1.26689	Down	1.18769	Up	Conserved hypothetical protein.
Os06g0256000	3.18333	0.84	1.97667	-1.92208	Down	1.23461	Up	Conserved hypothetical protein.
Os06g0707733	0.806667	0.2	0.496667	-2.01197	Down	1.31228	Up	Disease resistance protein domain containing protein.
Os04g0337500	4.25	1.64667	6.74667	-1.36791	Down	2.03463	Up	Aldo/keto reductase family protein.
Os03g0149200	47.7833	7.62333	32.2067	-2.64801	Down	2.07887	Up	HR-like lesion-inducer family protein.
Os02g0198700	35.5667	2.35667	11.6333	-3.91571	Down	2.30344	Up	Similar to Subtilisin-like protease.
Os03g0323500	5.67667	1.55333	3.47	-1.86968	Down	1.15957	Up	Arf GTPase activating protein family protein.
Os04g0649700	4.14667	1.13	2.34667	-1.87563	Down	1.05429	Up	Serine/threonine protein kinase-related domain containing protein.
Os06g0514800	155.237	14.11	233.643	-3.45968	Down	4.04952	Up	Conserved hypothetical protein.
Os06g0513862	129.273	13.0267	182.91	-3.31088	Down	3.81159	Up	Conserved hypothetical protein.
Os06g0118600	2.99333	0.516667	2.5	-2.53445	Down	2.27462	Up	Similar to Mov34/MPN/PAD-1 family protein.
Os11g0104400	13.7167	2.56333	12.6833	-2.41984	Down	2.30684	Up	Similar to W-3 fatty acid desaturase.
Os05g0217800	12.6633	0.0633333	2.74333	-7.64348	Down	5.43682	Up	BURP domain containing protein.
Os08g0538700	1.84333	0.413333	1.53667	-2.15694	Down	1.89443	Up	Retinoblastoma-related protein.
Os03g0727800	1.80333	0.526667	1.21	-1.7757	Down	1.20004	Up	Cyclin-like F-box domain containing protein.
Os07g0474300	2.39667	0.473333	2.17333	-2.3401	Down	2.19898	Up	Conserved hypothetical protein.
Os05g0499300	225.11	8.98333	82.64	-4.64724	Down	3.20152	Up	Similar to Peroxidase (EC 1.11.1.7).
Os06g0126500	95.7733	29.18	60.59	-1.71464	Down	1.0541	Up	Ubiquitin domain containing protein.
Os08g0237000	1067.95	279.147	594.393	-1.93574	Down	1.09039	Up	Xyloglucan endotransglycosylase/hydrolase protein 8 precursor (EC 2.4.1.207) (End-xyloglucan transferase)
Os03g0368300	10.3933	0.593333	2.86333	-4.13067	Down	2.27078	Up	Similar to Peroxidase 1.
Os03g0750300	5.46667	2.02333	4.57333	-1.43393	Down	1.17651	Up	Conserved hypothetical protein.
Os09g0426500	11.64	2.63	6.85333	-2.14596	Down	1.38174	Up	Similar to Integral membrane protein DUF6 containing protein.
Os06g0272850	3.39333	0.593333	1.66	-2.51579	Down	1.48427	Up	Domain of unknown function DUF231 plant domain containing protein.
Os06g0692050	2.18667	0.283333	1.44333	-2.94816	Down	2.34883	Up	Conserved hypothetical protein.
Os04g0522100	17.53	3.39	14.7933	-2.37047	Down	2.12559	Up	Similar to OSIGBa0131L05.12 protein.
Os11g0707600	37.02	6.93667	17.3867	-2.41599	Down	1.32567	Up	Similar to Sterol 4-alpha-methyl-oxidase (Fragment).
Os02g0509600	2.49	0.9	1.86667	-1.46815	Down	1.05247	Up	Conserved hypothetical protein.
Os03g0817800	52.22	14.8267	43.9433	-1.81641	Down	1.56745	Up	Protein of unknown function DUF231 domain containing protein.
Os10g0457400	3.32	0.723333	3.14	-2.19845	Down	2.11803	Up	Similar to shugoshin-1.
Os09g0556800	4.45	0.89	3.45333	-2.32193	Down	1.95611	Up	Conserved hypothetical protein.
Os10g0522200	3.08667	0.996667	3.76333	-1.63087	Down	1.91683	Up	Hypothetical protein.
Os01g0968400	15.4233	3.44667	9.03	-2.16184	Down	1.38952	Up	Root cap family protein.
Os04g0514800	17.6533	7.00667	14.41	-1.33314	Down	1.04027	Up	Similar to Dual specificity kinase 1.
Os09g0533200	5.27667	1.58	4.54667	-1.7397	Down	1.52488	Up	Glycoside hydrolase family 17 domain containing protein.
Os04g0553500	4.97667	0.71	2.56	-2.80929	Down	1.85025	Up	Pectin lyase fold domain containing protein.
Os08g0496600	2.17667	0.816667	2.63667	-1.4143	Down	1.6909	Up	Hypothetical conserved gene.
Os02g0810200	4.86	1.01667	3.64333	-2.25711	Down	1.84141	Up	Kinesin-related protein Regulation of cell division and plant development
Os06g0139150	4.24	1.19667	4.26667	-1.82504	Down	1.83409	Up	Conserved hypothetical protein.
Os01g0378100	3.26	0.17	0.88	-4.26127	Down	2.37197	Up	Plant peroxidase domain containing protein.
Os06g0634000	5.25333	0.953333	2.92	-2.46218	Down	1.61492	Up	Conserved hypothetical protein.
Os05g0337400	4.45333	0.866667	2.53667	-2.36134	Down	1.54938	Up	Similar to heavy-metal-associated domain-containing protein.
Os01g0274500	11.5967	2.99333	15.6233	-1.95389	Down	2.38388	Up	Similar to Expansin-A11.
Os10g0122400	20.6367	0.383333	5.42667	-5.75047	Down	3.82339	Up	Hypothetical protein.
Os03g0287400	2.47	0.823333	4.39333	-1.58496	Down	2.41577	Up	Similar to LOB domain protein 4.
Os07g0568700	94.3833	20.5167	62.0167	-2.20174	Down	1.59586	Up	Polygalacturonase-inhibiting protein Inhibitor of fungal polygalacturonase Regulation of floral organ number
Os03g0861300	0.556667	0.001	0.266667	-9.12067	Down	8.05889	Up	Similar to Aquaporin.
Os03g0861100	12.2433	3.85333	10.0167	-1.66782	Down	1.37822	Up	Conserved hypothetical protein.
Os03g0809000	87.8833	7.80667	20.0567	-3.49281	Down	1.3613	Up	Plant disease resistance response protein family protein.
Os11g0672700	0.77	0.133333	0.5	-2.52982	Down	1.90689	Up	RecQ DNA helicase RNA silencing
Os11g0575600	12.66	2.23	6.72333	-2.50516	Down	1.59213	Up	Similar to Lipoxygenase (Fragment).
Os07g0625800	15.6467	2.46	13.3667	-2.66913	Down	2.44191	Up	Plant lipid transfer protein/Par allergen family protein.
Os03g0628800	48.2667	7.16333	24.78	-2.75232	Down	1.79047	Up	Similar to H1flk (Fragment).
Os12g0149300	3.40667	0.496667	2.37333	-2.77801	Down	2.25656	Up	Similar to galactosyl transferase GMA12/MNN10 family protein.
Os01g0647200	50.0133	0.73	2.00333	-6.09827	Down	1.45643	Up	Hypothetical conserved gene.
Os08g0106100	13.7333	4.86667	12.9233	-1.49668	Down	1.40897	Up	Conserved hypothetical protein.
Os04g0106500	2.05667	0.503333	1.48	-2.03072	Down	1.55601	Up	Similar to B0616E02-H0507E05.9 protein.
Os01g0211200	2.57333	0.103333	2.52333	-4.63826	Down	4.60995	Up	Cytochrome P450 family protein.
Os02g0192500	92.5	32.6433	82.6133	-1.50266	Down	1.33959	Up	Similar to Cellulose synthase-like protein (Fragment).
Os06g0652600	16.9833	3.15	8.28	-2.4307	Down	1.39428	Up	Similar to Lustrin A.
Os05g0429900	11.7667	4.47667	16.5733	-1.39421	Down	1.88837	Up	Similar to MybHv5 (Fragment).
Os09g0400100	1.7	0.243333	1.90667	-2.80453	Down	2.97005	Up	Similar to Cinnamyl alcohol dehydrogenase (EC 1.1.1.195).
Os01g0935800	5.41667	0.943333	4.13	-2.52157	Down	2.1303	Up	Similar to BRASSINOSTEROID INSENSITIVE 1-associated receptor kinase 1.
Os07g0573400	18.3467	7.18	15.9267	-1.35346	Down	1.14939	Up	Protein of unknown function DUF239 plant domain containing protein.
Os03g0202001	6.91667	1.40667	5	-2.2978	Down	1.82965	Up	Similar to Adenylyl-sulfate kinase.
Os01g0779800	0.84	0.213333	1.17333	-1.97728	Down	2.45943	Up	Similar to SR protein related family member.
Os01g0176800	4.46667	0.59	1.71667	-2.92041	Down	1.54082	Up	Protein of unknown function DUF2921 domain containing protein.
Os03g0138500	7.65	2.11	8.70667	-1.85822	Down	2.04488	Up	Conserved hypothetical protein.
Os08g0229601	3.05667	1.50333	3.77333	-1.02379	Down	1.32767	Up	Hypothetical conserved gene.
Os05g0376600	0.726667	0.113333	0.613333	-2.68072	Down	2.4361	Up	BRCT domain containing protein.
Os04g0375900	2.94667	1.07	2.34333	-1.46147	Down	1.13095	Up	Kinesin motor region domain containing protein.
Os06g0193200	3.88667	0.293333	1.29	-3.72792	Down	2.13676	Up	Similar to Pectin methylesterase 8 (Fragment).
Os04g0173800	14.4233	0.45	4.91333	-5.00234	Down	3.44871	Up	Lectin precursor (Agglutinin).
Os02g0302700	15.73	7.32667	17.3	-1.10229	Down	1.23954	Up	Similar to Nicotianamine aminotransferase A.
Os01g0509900	1.73667	0.36	1.21667	-2.27025	Down	1.75687	Up	F-box domain Skp2-like domain containing protein.
Os05g0425000	1.45	0.293333	0.983333	-2.30544	Down	1.74514	Up	Hypothetical conserved gene.
Os03g0162200	30.0533	7.87	24.26	-1.93309	Down	1.62414	Up	Similar to Histone H2A.
Os06g0290701	5.33333	1	5.10333	-2.41504	Down	2.35144	Up	Hypothetical protein.
Os12g0459100	4.28333	1.41333	4.96	-1.59963	Down	1.81124	Up	Similar to Transferase family protein.
Os02g0236600	106.307	8.6	43.2133	-3.62775	Down	2.32907	Up	Peroxidase P7 (EC 1.11.1.7) (TP7).
Os04g0540900	4.56667	1.78333	9.04333	-1.35657	Down	2.34228	Up	Receptor-like cytoplasmic kinase Salt tolerance Oxidative stress tolerance
Os07g0567250	0.946667	0.27	0.803333	-1.8099	Down	1.57304	Up	Hypothetical protein.
Os01g0273100	23.9933	6.06333	27.1633	-1.98445	Down	2.16348	Up	Similar to Ubiquitin conjugating protein-like (Ubiquitin-conjugating enzyme) (Ubiquitinating enzyme).
Os11g0107700	4.64333	1.27667	4.53667	-1.86278	Down	1.82925	Up	Similar to Leucine Rich Repeat family protein expressed.
MSTRG.33259	1.37	0.001	1.08	-10.42	Down	10.0768	Up	--
Os10g0450000	8.20667	0.79	5.38333	-3.37687	Down	2.76858	Up	Protein of unknown function DUF247 plant family protein.
Os04g0231200	3.94333	0.95	2.87	-2.05342	Down	1.59505	Up	Hypothetical gene.
Os02g0433900	2.86667	0.663333	1.83	-2.11157	Down	1.46404	Up	Conserved hypothetical protein.
Os02g0739900	8.35	3.50333	7.45667	-1.25305	Down	1.0898	Up	Similar to microtubule-associated protein TORTIFOLIA1.
Os04g0350300	5.40667	1.35	3.19667	-2.00178	Down	1.24361	Up	Similar to SKIP interacting protein 18 (Fragment).
Os03g0250200	5.10667	1.98667	4.26667	-1.36203	Down	1.10276	Up	TB2/DP1 and HVA22 related protein family protein.
MSTRG.8172	2.44667	0.001	0.406667	-11.2566	Down	8.6677	Up	--
Os03g0307300	1255.45	25.0633	397.967	-5.64649	Down	3.989	Up	Nicotianamine synthase 1 (EC 2.5.1.43) (S-adenosyl-L-methionine:S- adenosyl-L-methionine:S-adenosyl-methionine 3-amino-3- carboxypropyltransferase 1)
Os05g0493400	1.37	0.35	1.44667	-1.96875	Down	2.04731	Up	Similar to Cyclin box (Fragment).
Os01g0296700	7.59667	0.9	4.76	-3.07737	Down	2.40296	Up	Glycoside hydrolase family 3 N-terminal domain containing protein.
Os10g0459600	0.386667	0.0666667	0.436667	-2.53605	Down	2.71149	Up	Similar to Xyloglucan galactosyltransferase KATAMARI 1 (EC 2.4.1.-) (MURUS3 protein).
Os03g0281100	3.67	1.26667	3.67667	-1.53474	Down	1.53736	Up	Ankyrin repeat containing protein.
Os01g0848200	1.09333	0.3	2.72	-1.8657	Down	3.18057	Up	Similar to Delta 1-pyrroline-5-carboxylate synthetase (P5CS) [Includes: Glutamate 5-kinase (EC 2.7.2.11) (Gamma-glutamyl kinase) (GK)%3B Gamma-glutamyl phosphate reductase (GPR) (EC 1.2.1.41) (Glutamate-5-semialdehyde dehydrogenase) (Glutamyl-gamma-semialdehyde dehydrogena
Os04g0140666	16.1833	1.48667	6.36667	-3.44436	Down	2.09846	Up	Similar to OSIGBa0124C14.6 protein.
Os04g0530900	9.03667	2.03	7.53	-2.15431	Down	1.89117	Up	Glycosyl transferase family 8 protein.
Os01g0805600	16.9933	4.40333	13.4633	-1.9483	Down	1.61237	Up	Similar to Cyclin-B1-1.
Os05g0531400	5.44333	1.37667	7.88	-1.98331	Down	2.51702	Up	Pollen Ole e 1 allergen and extensin domain containing protein.
Os01g0925300	16.6533	4.74667	11.5733	-1.81082	Down	1.28582	Up	Zinc finger DHHC-type domain containing protein.
Os10g0554800	32.6567	3.29	16.64	-3.31122	Down	2.3385	Up	Plant lipid transfer protein and hydrophobic protein helical domain containing protein.
Os12g0180100	19.48	5.57	14.2867	-1.80624	Down	1.35892	Up	Major facilitator superfamily protein.
Os08g0376500	17.48	2.21667	21.4833	-2.97924	Down	3.27675	Up	Similar to Patatin-like protein.
Os01g0191800	9.2	2.07333	7.51333	-2.14968	Down	1.8575	Up	Similar to Aurora kinase.
Os04g0496300	48.29	10.9933	42.3333	-2.1351	Down	1.94517	Up	Similar to H0306B06.4 protein.
Os03g0102600	4.29	1.95667	6.10667	-1.13258	Down	1.64199	Up	Conserved hypothetical protein.
Os10g0453900	12.1333	2.6	10.3967	-2.22239	Down	1.99954	Up	Eggshell protein family protein.
Os09g0132900	0.773333	0.0533333	0.38	-3.85798	Down	2.83289	Up	Lipase GDSL domain containing protein.
Os04g0310200	8.88333	0.81	22.45	-3.45511	Down	4.79265	Up	Similar to H0211A12.13 protein.
Os09g0443800	1.88333	0.363333	1.99333	-2.37392	Down	2.45582	Up	Conserved hypothetical protein.
Os03g0567100	2.89333	1.17667	4.33	-1.29803	Down	1.87966	Up	Conserved hypothetical protein.
Os03g0339700	5.15333	1.16667	3.60667	-2.14311	Down	1.62827	Up	Protein of unknown function DUF827 plant family protein.
Os05g0396900	10.3867	2.93333	8.33333	-1.82412	Down	1.50635	Up	Conserved hypothetical protein.
Os03g0762900	2.35333	0.65	1.69	-1.85619	Down	1.37851	Up	Protein of unknown function DUF566 family protein.
Os08g0553200	0.793333	0.186667	0.84	-2.08746	Down	2.16993	Up	Protein of unknown function DUF241 plant family protein.
Os08g0566100	2.11333	0.14	1.04	-3.91602	Down	2.89308	Up	Protein of unknown function DUF239 plant domain containing protein.
Os10g0104900	6.8	1.12333	4.96667	-2.59775	Down	2.14449	Up	Chromomethylase Plant development Silencing of transposable elements (TEs)
Os05g0430700	4.01667	0.776667	2.44	-2.37063	Down	1.65151	Up	Protein of unknown function DUF803 family protein.
Os05g0493500	10.69	2.22333	8.82667	-2.26547	Down	1.98914	Up	Similar to Cyclin-B1-5.
Os05g0382600	115.783	20.7533	66.1167	-2.48001	Down	1.67167	Up	Similar to Annexin-like protein RJ4.
Os01g0514600	4.85333	0.733333	2.53	-2.72643	Down	1.7866	Up	Similar to Fimbrin 1 (AtFIM1).
MSTRG.1622	110.427	7.61	31.1533	-3.85905	Down	2.03342	Up	PREDICTED: ervatamin-B-like [Oryza sativa Japonica Group]
Os11g0587300	7.41333	0.636667	4.91667	-3.54151	Down	2.94907	Up	Conserved hypothetical protein.
Os06g0185100	2.11333	0.0633333	4.23333	-5.06041	Down	6.06269	Up	Similar to estradiol 17-beta-dehydrogenase 8.
Os05g0191700	1.56333	0.0166667	0.706667	-6.55152	Down	5.40599	Up	Similar to Stem 28 kDa glycoprotein.
Os03g0747100	2.87333	0.466667	3.00333	-2.62226	Down	2.6861	Up	ERG2/sigma1 receptor-like domain containing protein.
Os04g0556100	2.01667	0.966667	2.16667	-1.06088	Down	1.16439	Up	Conserved hypothetical protein.
Os02g0719000	10.7667	1.91	4.33667	-2.49493	Down	1.18301	Up	Similar to Rho GDP-dissociation inhibitor 1 (Rho GDI-1) (AtRhoGDI1).
Os06g0592950	16.91	6.01667	12.1567	-1.49084	Down	1.01471	Up	Hypothetical gene.
Os07g0551600	1.03333	0.0633333	1.26667	-4.0282	Down	4.32193	Up	Similar to Cellulose synthase-like CslF9.
Os05g0217000	43.7333	2.92	19.72	-3.90469	Down	2.75562	Up	Protein of unknown function DUF1070 family protein.
Os01g0502700	15.6867	2.93	11.5333	-2.42057	Down	1.97684	Up	Similar to Histone H2A.
Os01g0284500	1818.94	131.867	454.2	-3.78595	Down	1.78425	Up	Similar to Nectarin 1 precursor (EC 1.15.1.1) (Superoxide dismutase [Mn]).
Os01g0233500	3.47	0.576667	2.49	-2.58913	Down	2.11034	Up	Cyclin.
Os09g0371100	3.11333	1.31333	3.13667	-1.24523	Down	1.256	Up	Similar to hydrogen symporter.
Os08g0154300	21.4933	9.99333	22.93	-1.10485	Down	1.1982	Up	Aldolase-type TIM barrel domain containing protein.
Os02g0183000	4.16	1.62333	3.71	-1.35762	Down	1.19246	Up	Protein of unknown function DUF597 domain containing protein.
Os08g0376550	28.0933	3.07667	33.9	-3.19079	Down	3.46185	Up	Similar to Patatin-like protein 1.
Os03g0669100	30.0533	11.3733	29.6733	-1.40187	Down	1.38351	Up	Similar to predicted protein.
Os01g0726100	4.98	0.686667	3.94	-2.85846	Down	2.52051	Up	Pollen Ole e 1 allergen and extensin domain containing protein.
Os01g0702700	5.99333	1.54333	4.32	-1.95731	Down	1.48498	Up	Similar to Transcription factor MYB86 (Myb-related protein 86) (AtMYB86) (Myb homolog 4) (AtMyb4).
Os10g0577400	4.77667	1.58667	4.97	-1.59001	Down	1.64725	Up	Conserved hypothetical protein.
Os09g0538700	1.1	0.393333	1.08667	-1.48368	Down	1.46609	Up	Protein of unknown function DUF632 domain containing protein.
Os01g0216400	2.21	0.103333	1.04333	-4.41867	Down	3.33582	Up	Lipase GDSL domain containing protein.
Os12g0548401	177.383	21.9133	151.627	-3.01699	Down	2.79064	Up	Similar to Proteinase inhibitor.
Os05g0510600	3.94333	0.85	2.97667	-2.21388	Down	1.80816	Up	Similar to tyrosine/DOPA decarboxylase 1.
Os05g0319700	4.65333	1.53	4.88667	-1.60473	Down	1.67532	Up	Similar to Protein kinase-like protein (Fragment).
Os10g0330000	220	32.45	181.85	-2.76121	Down	2.48646	Up	Conserved hypothetical protein.
Os01g0312800	4.33667	1.18	3.28667	-1.8778	Down	1.47784	Up	Similar to CEL4%3DCELLULASE 4 (Fragment).
Os12g0610300	2.75	0.736667	1.87	-1.90035	Down	1.34395	Up	Hypothetical conserved gene.
Os03g0180800	5.25333	1.82	11.9433	-1.52929	Down	2.7142	Up	TIFY domain-containing transcriptional regulator Salt and dehydration stress tolerance
Os01g0957100	13.4333	3.88333	8.89667	-1.79045	Down	1.19597	Up	Protein kinase core domain containing protein.
Os01g0972900	2.80667	0.593333	2.11667	-2.24194	Down	1.83488	Up	Similar to Clone ZZD405 mRNA sequence. (Fragment).
Os02g0629800	59.1633	3.62333	59.9433	-4.02931	Down	4.04821	Up	Defensin-like protein Positive regulation of Cd accumulation in rice leaves Mediation of Cd efflux from cytosol into extracellular spaces via chelation
Os08g0533300	3.42	0.943333	2.69667	-1.85816	Down	1.51534	Up	Similar to ACR5.
Os03g0819600	139.587	55.5933	200.403	-1.32818	Down	1.84992	Up	Chalcone isomerase (EC 5.5.1.6).
Os10g0377150	6.66667	0.766667	5.66333	-3.12029	Down	2.88498	Up	Hypothetical protein.
Os07g0574800	263.027	99.6633	201.597	-1.40007	Down	1.01634	Up	Tubulin alpha-1 chain.
Os02g0558600	1.27333	0.383333	1.12667	-1.73194	Down	1.55539	Up	Conserved hypothetical protein.
Os01g0312500	4.24333	0.736667	3.51667	-2.52611	Down	2.25512	Up	Similar to Pectinesterase.
Os02g0574600	14.0133	1.98667	8.50667	-2.81838	Down	2.09824	Up	Similar to H0523F07.2 protein.
MSTRG.2710	3.73333	1.23333	5.12333	-1.5979	Down	2.05452	Up	PREDICTED: cytochrome b561 domain-containing protein At2g30890 [Oryza sativa Japonica Group]
Os04g0552200	13.6667	1.04	4.53667	-3.71601	Down	2.12505	Up	Beta-expansin 5.
Os03g0721300	17.3267	5.67	13.3933	-1.61157	Down	1.24009	Up	Protein of unknown function DUF946 plant family protein.
Os06g0604200	5.01333	0.64	6.88333	-2.96963	Down	3.42696	Up	Chloroplast-localized phospholipase D Herbivore defense
Os01g0907200	5.15	1.67	9.39667	-1.62472	Down	2.4923	Up	Similar to BCL-2 binding anthanogene-1.
Os12g0431300	5.94667	1.30667	3.37333	-2.18619	Down	1.36828	Up	Six-bladed beta-propeller TolB-like domain containing protein.
Os06g0678800	22.7067	5.97	24.8533	-1.92731	Down	2.05764	Up	Similar to Pollen-specific protein NTP303 precursor.
Os05g0510800	17.27	5.39333	14.59	-1.67902	Down	1.43573	Up	Similar to Cellulose synthase-like family C1 protein.
Os09g0314333	5.78333	1.20667	3.15333	-2.26087	Down	1.38585	Up	UAA transporter family protein.
Os08g0160600	1.24667	0.413333	1.14	-1.5927	Down	1.46366	Up	Hypothetical protein.
Os10g0529300	41.5467	5.98333	17.3633	-2.79571	Down	1.53702	Up	Similar to Tau class GST protein 3.
Os05g0594500	1.9	0.306667	1.62667	-2.63126	Down	2.40718	Up	Invasin/intimin cell-adhesion domain containing protein.
Os09g0248100	118.623	38.9067	103.23	-1.6083	Down	1.40777	Up	FAS1 domain domain containing protein.
Os01g0914100	27.09	0.486667	9.96	-5.79868	Down	4.35514	Up	Plant lipid transfer protein/seed storage/trypsin-alpha amylase inhibitor domain containing protein.
Os05g0235800	5.23667	0.853333	4.17333	-2.61747	Down	2.29002	Up	DNA-dependent ATPase MCM domain containing protein.
Os05g0205100	2.88667	0.916667	2.92667	-1.65494	Down	1.67479	Up	NLI interacting factor domain containing protein.
Os01g0127600	786.56	25.2733	386.18	-4.95987	Down	3.93359	Up	Similar to Bowman-Birk type proteinase inhibitor D-II precursor (IV).
Os02g0700100	37.9633	12.4133	28.7333	-1.61272	Down	1.21083	Up	Similar to WD-repeat protein.
Os03g0114000	4	0.813333	2.56333	-2.29808	Down	1.6561	Up	Similar to Kinesin.
Os04g0642100	4.46333	1.79667	4.71667	-1.3128	Down	1.39244	Up	Microtubule-associated protein EB1.
Os01g0166800	6.25	2.07667	6.26333	-1.58959	Down	1.59266	Up	Similar to ETG1 (E2F TARGET GENE 1).
Os07g0462200	143.623	60.6367	125.977	-1.24403	Down	1.05489	Up	Protein of unknown function DUF1218 family protein.
Os06g0285400	6.10667	1.78	6.11667	-1.77851	Down	1.78087	Up	Similar to Serine/threonine-specific kinase like protein.
Os05g0587700	0.623333	0.0433333	0.376667	-3.84645	Down	3.11974	Up	Conserved hypothetical protein.
Os09g0298500	9.44667	2.90333	6.43	-1.7021	Down	1.14711	Up	Zinc finger RING/FYVE/PHD-type domain containing protein.
Os09g0101800	0.986667	0.16	0.786667	-2.62449	Down	2.29768	Up	Quinoprotein amine dehydrogenase beta chain-like domain containing protein.
Os02g0678400	40	15.4	33.51	-1.37707	Down	1.12166	Up	NAD(P)-binding domain containing protein.
Os04g0563900	2.51333	0.563333	1.49333	-2.15754	Down	1.40648	Up	Similar to H0409D10.5 protein.
Os06g0236600	0.956667	0.02	0.46	-5.57994	Down	4.52356	Up	Cyclin-D1-1.
Os03g0780800	18.9733	3.75	13.9033	-2.33901	Down	1.89047	Up	Fatty acid 2-hydroxylase Resistance to rice blast fungus infection
Os10g0536700	36.9733	4.43667	21.9367	-3.05894	Down	2.3058	Up	Similar to Peroxidase 1.
Os11g0505300	9.43667	0.393333	3.50667	-4.58445	Down	3.15628	Up	Sulfotransferase Resistance to rice stripe virus
Os09g0526500	1.40667	0.306667	1.23	-2.19754	Down	2.00392	Up	C2 calcium/lipid-binding region CaLB domain containing protein.
Os09g0521400	20.4933	5.52	14.0967	-1.89241	Down	1.35261	Up	Similar to HMG-CoA synthase.
Os12g0548700	484.007	49.9267	329.827	-3.27714	Down	2.72383	Up	Similar to MPI.
Os05g0139100	4.62	0.91	1.98333	-2.34395	Down	1.12399	Up	Helix-loop-helix DNA-binding domain containing protein.
Os12g0560700	4.43667	0.636667	3.58333	-2.80087	Down	2.49269	Up	Similar to PROLIFERA protein.
Os05g0462700	20.93	6.79667	15.66	-1.62267	Down	1.20418	Up	Similar to Histone H4.
Os01g0931200	10.1467	2.37333	7.68333	-2.09602	Down	1.69482	Up	Armadillo-type fold domain containing protein.
Os04g0201800	2.34667	0.463333	2.18667	-2.34049	Down	2.23861	Up	Similar to H0512B01.7 protein.
Os01g0122367	0.716667	0.001	0.303333	-9.48516	Down	8.24476	Up	Hypothetical protein.
Os12g0165600	0.596667	0.0266667	0.243333	-4.48382	Down	3.18982	Up	Exo70 exocyst complex subunit family protein.
Os08g0532700	14.1867	3.47	9.40667	-2.03153	Down	1.43875	Up	Similar to Peroxidase 55 precursor (EC 1.11.1.7) (Atperox P55) (ATP20a).
Os03g0713100	39.09	18.3667	37.6533	-1.08971	Down	1.03569	Up	Similar to dynamin-related protein 1C.
Os03g0368150	8.91667	0.27	2.59667	-5.04547	Down	3.26563	Up	Hypothetical protein.
Os05g0153300	10.89	0.133333	3.61	-6.35182	Down	4.75889	Up	Lipase class 3 domain containing protein.
Os02g0767300	1.83	0.3	1.55	-2.60881	Down	2.36923	Up	Similar to Flavonol synthase/flavanone 3-hydroxylase (EC 1.14.11.23) (EC 1.14.11.9) (FLS) (CitFLS).
Os02g0199200	1.45667	0.54	1.36667	-1.43164	Down	1.33963	Up	Disease resistance protein domain containing protein.
Os04g0629200	40.4933	1.16667	4.74667	-5.11722	Down	2.02452	Up	Cupredoxin domain containing protein.
Os07g0658700	2.57667	0.836667	2.26	-1.62278	Down	1.4336	Up	Phosphatidylinositol-4-phosphate 5-kinase family protein.
Os04g0449200	5.57667	0.29	1.44	-4.26528	Down	2.31194	Up	Xyloglucan fucosyltransferase family protein.
Os10g0111900	2.00667	0.09	0.716667	-4.47873	Down	2.99331	Up	Similar to Protein kinase domain containing protein expressed.
Os11g0275800	0.763333	0.136667	0.823333	-2.48165	Down	2.59082	Up	Crotonase core domain containing protein.
Os03g0645000	5.11333	0.583333	3.60667	-3.13187	Down	2.62827	Up	Similar to Expansin-B12.
Os03g0852400	15.21	4.96	13.9667	-1.61661	Down	1.49358	Up	Conserved hypothetical protein.
Os03g0264600	3.5	0.466667	2.25667	-2.90689	Down	2.27373	Up	Similar to Nucleic acid binding protein.
Os06g0660200	7.80667	1.43333	4.87	-2.44533	Down	1.76455	Up	Auxin efflux transporter Polar auxin transport Control of canopy architecture
Os11g0115100	142.6	9.17	81.0133	-3.95891	Down	3.14317	Up	Similar to Lipid transfer protein.
Os03g0767600	11.2767	2.69667	7.70667	-2.06409	Down	1.51493	Up	BTB domain containing protein.
Os10g0551800	99.2	4.10667	24.2633	-4.5943	Down	2.56274	Up	Root-specific protein (RCc2 protein).
Os03g0795300	142.58	58.3333	131.787	-1.28938	Down	1.17581	Up	Similar to Extensin protein-like.
Os02g0773600	1.21	0.06	0.713333	-4.3339	Down	3.57154	Up	Hypothetical conserved gene.
Os01g0833500	5.35	0.92	3.36	-2.53983	Down	1.86876	Up	Similar to Serine carboxypeptidase II-1 precursor (EC 3.4.16.6) (CP-MII.1) (Fragment).
Os12g0263100	5.66	1.46333	3.45667	-1.95154	Down	1.24012	Up	Similar to Zinc finger DHHC domain containing 4.
Os11g0596250	56.0533	26.2133	58.1	-1.0965	Down	1.14824	Up	Conserved hypothetical protein.
Os04g0631200	6.23	1.72	5.46667	-1.85682	Down	1.66825	Up	Similar to cDNA clone:J033024P08 full insert sequence.
Os03g0320800	1.88667	0.47	1.39333	-2.00511	Down	1.56781	Up	Similar to Leucine Rich Repeat family protein expressed.
Os03g0606100	2.13333	0.663333	1.5	-1.6853	Down	1.17716	Up	Similar to predicted protein.
Os06g0691200	10.7967	2.94333	21.8567	-1.87506	Down	2.89255	Up	Similar to Thaumatin-like protein precursor.
Os01g0126900	18.23	2.58333	9.59333	-2.81901	Down	1.8928	Up	Multicopper oxidase
Os10g0420200	2.86333	0.243333	1.49333	-3.55669	Down	2.61753	Up	IQ calmodulin-binding region domain containing protein.
Os06g0266800	58.8433	9.90667	45.1433	-2.57041	Down	2.18804	Up	Similar to Gibberellin-stimulated protein.
Os06g0203200	4.69	0.893333	2.48667	-2.39232	Down	1.47694	Up	Flavin-containing monooxygenase FMO family protein.
Os02g0258250	26.48	5.49	14.6567	-2.27003	Down	1.41668	Up	Hypothetical conserved gene.
Os04g0228100	10.8033	3.11667	10.0933	-1.7934	Down	1.69533	Up	Similar to H0209A05.2 protein.
Os08g0397800	4.52333	0.783333	4.68	-2.52969	Down	2.57881	Up	Conserved hypothetical protein.
Os08g0490600	25.69	9.29333	39.1533	-1.46694	Down	2.07487	Up	FAS1 domain domain containing protein.
Os04g0640700	51.1833	9.82667	36.0133	-2.3809	Down	1.87376	Up	Similar to Alpha-L-arabinofuranosidase/beta-D-xylosidase isoenzyme ARA-I.
Os03g0209800	0.58	0.133333	0.403333	-2.12102	Down	1.59694	Up	RhoGAP domain containing protein.
Os03g0165400	11.3533	2.41333	6.83	-2.23402	Down	1.50086	Up	Similar to Relative to SR12 protein (Fragment).
Os09g0547200	5.12333	1.61	4.56667	-1.67002	Down	1.50408	Up	Protein of unknown function DUF292 eukaryotic domain containing protein.
Os05g0427900	1.76667	0.586667	2.72667	-1.59042	Down	2.21653	Up	Similar to DnaJ-like protein.
Os05g0438700	121.557	18.2033	74.38	-2.73935	Down	2.03071	Up	Similar to Histone H3.
MSTRG.670	1.68667	0.22	1.19667	-2.9386	Down	2.44345	Up	PREDICTED: translation initiation factor IF-2 [Oryza sativa Japonica Group]
Os12g0569200	279.14	20.37	229.76	-3.77647	Down	3.49561	Up	Conserved hypothetical protein.
Os08g0468901	0.216667	0.001	0.146667	-7.75933	Down	7.1964	Up	Hypothetical protein.
Os07g0294100	1.40333	0.12	0.753333	-3.54775	Down	2.65025	Up	Similar to NB-ARC domain containing protein.
Os12g0124700	1.13333	0.173333	1.15	-2.70895	Down	2.73001	Up	CDC45-like protein family protein.
Os04g0672300	6.37333	1.39	5.62333	-2.19696	Down	2.01634	Up	Similar to H0322F07.3 protein.
Os06g0643500	48.86	11.4867	54.6233	-2.08869	Down	2.24956	Up	Similar to ADR11 protein (Fragment).
Os05g0497200	13.5833	4.33333	14.4767	-1.64829	Down	1.74018	Up	AP2/ERF (APETALA2/ethylene-responsive factor) protein Regulation of spikelet meristem determinancy and floral organ identity
Os10g0109300	85.2033	6.85	19.5667	-3.63673	Down	1.51422	Up	Similar to Peroxidase (EC 1.11.1.7).
Os01g0347600	215.647	43.5467	126.297	-2.30804	Down	1.53618	Up	Ervatamin B (EC 3.4.22.-) (ERV-B).
Os07g0236300	5.14	2.16333	5.97333	-1.24851	Down	1.46528	Up	Hypothetical gene.
Os05g0207400	5.22667	1.13333	3.60667	-2.20532	Down	1.67009	Up	Zinc finger RING/FYVE/PHD-type domain containing protein.
Os10g0352000	6.76	0.573333	1.95333	-3.55958	Down	1.76849	Up	Conserved hypothetical protein.
Os02g0131500	0.456667	0.001	0.14	-8.835	Down	7.12928	Up	Hypothetical protein.
Os06g0693100	0.3	0.03	1.18	-3.32193	Down	5.29768	Up	NB-ARC domain containing protein.
Os02g0756200	16.3367	1.64667	7.17	-3.31049	Down	2.12242	Up	Similar to Phi-1-like phosphate-induced protein.
Os01g0914300	101.417	6.12333	32.3567	-4.04983	Down	2.40167	Up	Plant lipid transfer protein/seed storage/trypsin-alpha amylase inhibitor domain containing protein.
Os07g0551700	3.01	1.4	3.27333	-1.10434	Down	1.22533	Up	Similar to Cellulose synthase (Fragment).
Os07g0112700	96.11	20.5	66.1133	-2.22906	Down	1.68932	Up	Cupredoxin domain containing protein.
Os02g0785700	4.05333	0.61	2.82333	-2.73223	Down	2.21052	Up	Hypothetical conserved gene.
Os12g0552900	1.69667	0.19	1.34	-3.15863	Down	2.81816	Up	NB-ARC domain containing protein.
Os04g0382900	5.06667	1.38333	7.44667	-1.87289	Down	2.42845	Up	Conserved hypothetical protein.
Os12g0410200	4.39	1.34	9.07667	-1.71199	Down	2.75993	Up	Conserved hypothetical protein.
Os06g0703300	10.0667	4.86667	10.6533	-1.04858	Down	1.1303	Up	Hypothetical conserved gene.
Os01g0140400	6.76	1.94333	4.29667	-1.79849	Down	1.14468	Up	Similar to leucine-rich repeat protein-related.
Os08g0143600	1.08	0.143333	0.813333	-2.91359	Down	2.50447	Up	Similar to Avr9/Cf-9 rapidly elicited protein 14 (Fragment).
Os03g0756300	9.28667	1.67333	7.17333	-2.47244	Down	2.09992	Up	X8 domain containing protein.
Os06g0566500	6.75	1.55333	3.83333	-2.11952	Down	1.30323	Up	Hypothetical conserved gene.
Os11g0514800	13.8533	2.09333	6.65	-2.72636	Down	1.66755	Up	BRO1 domain domain containing protein.
Os01g0348000	112.77	18.9033	61.52	-2.57667	Down	1.70241	Up	Similar to Papain-like cysteine proteinase (Fragment).
Os07g0677300	172.673	51.2933	180.997	-1.7512	Down	1.81912	Up	Peroxidase.
Os09g0520800	0.843333	0.246667	1.2	-1.77354	Down	2.2824	Up	Glycoside hydrolase family 29 (alpha-L-fucosidase) protein.
Os11g0458100	1.79667	0.726667	1.90333	-1.30596	Down	1.38916	Up	Conserved hypothetical protein.
Os02g0164400	0.356667	0.001	0.7	-8.47843	Down	9.45121	Up	Hypothetical conserved gene.
Os08g0547500	4.18667	1.31	3.04667	-1.67624	Down	1.21766	Up	Kinesin motor domain domain containing protein.
Os12g0572000	6.74333	2.94667	6.07	-1.19438	Down	1.04261	Up	R2R3-type MYB transcription factor Adaptive growth Salt tolerance
Os07g0466000	9.54667	0.0266667	1.55	-8.48382	Down	5.86109	Up	Conserved hypothetical protein.
Os06g0696400	55.1767	8.97667	55.1933	-2.61981	Down	2.62024	Up	Xyloglycan endo-transglycosylase precursor.
Os04g0128400	1.08667	0.14	0.91	-2.95641	Down	2.70044	Up	Similar to OSIGBa0126J24.7 protein.
Os05g0512600	68.6867	14	64.75	-2.2946	Down	2.20945	Up	X8 domain containing protein.
Os01g0118300	4.31333	1.11667	3.35333	-1.9496	Down	1.5864	Up	Similar to Phosphatidyl serine synthase.
Os05g0458300	9.44333	3.16667	13.0567	-1.57633	Down	2.04375	Up	Similar to L-ascorbate oxidase.
Os04g0670100	5.23	2.59333	6.60333	-1.012	Down	1.34839	Up	Similar to H0818H01.13 protein.
Os07g0277200	1.75667	0.453333	2.08667	-1.9542	Down	2.20256	Up	Conserved hypothetical protein.
Os06g0687600	7.95	2.52667	7.38333	-1.65372	Down	1.54704	Up	Protein of unknown function DUF579 plant family protein.
Os04g0468600	336.737	61.6233	135.767	-2.45007	Down	1.13958	Up	Hypothetical conserved gene.
Os06g0575400	15.4367	2.78667	5.68667	-2.46975	Down	1.02904	Up	Serine/threonine protein kinase-related domain containing protein.
Os02g0278700	0.88	0.03	0.506667	-4.87447	Down	4.078	Up	Similar to Kaurene synthase A (Fragment).
Os02g0226200	3.50333	1.33	6.51333	-1.3973	Down	2.29197	Up	HAD-superfamily subfamily IB hydrolase hypothetical 1 protein.
Os06g0593100	55.6467	18.9567	40.4767	-1.55359	Down	1.09439	Up	Similar to UDP-galactose/UDP-glucose transporter.
Os01g0375500	2.32	0.32	1.61667	-2.85798	Down	2.33688	Up	Similar to Shikimate biosynthesis protein aroDE.
Os03g0363600	1.41	0.25	1.65667	-2.4957	Down	2.72828	Up	Similar to Sugar transporter-like protein.
Os03g0856700	7.43333	1.65667	3.82667	-2.16573	Down	1.2078	Up	Gibberellin 20 oxidase 1 (EC 1.14.11.-) (Gibberellin C-20 oxidase 1) (GA 20-oxidase 1)
Os05g0358200	1.66	0.513333	1.28	-1.69322	Down	1.31818	Up	Similar to DNA primase.
Os10g0169200	207.803	55.4167	141.11	-1.90683	Down	1.34843	Up	Conserved hypothetical protein.
Os01g0169800	15.6567	5.77667	18.9867	-1.43847	Down	1.71668	Up	Tryptophan aminotransferase Indole-3-acetic acid (IAA) biosynthesis
Os01g0765500	1.97	0.373333	1.51333	-2.39966	Down	2.01919	Up	Conserved hypothetical protein.
Os10g0454200	225.25	35.26	158.26	-2.67542	Down	2.16619	Up	Eggshell protein family protein.
Os03g0729500	10.01	2.51333	8.85667	-1.99377	Down	1.81716	Up	Transcription factor Floral organ development
Os04g0457500	15.78	3.66667	7.47667	-2.10556	Down	1.02793	Up	Similar to H0523F07.13 protein.
Os06g0728800	12.2867	3.63333	9.02	-1.75773	Down	1.31183	Up	Similar to predicted protein.
Os11g0645400	6.85	0.796667	9.71	-3.10406	Down	3.60742	Up	Plant disease resistance response protein family protein.
Os04g0597866	2.68667	0.5	2.29667	-2.42582	Down	2.19954	Up	Hypothetical gene.
Os05g0397900	5.03	1.62667	3.48	-1.62864	Down	1.09717	Up	Kinesin motor region domain containing protein.
Os08g0168700	1.54667	0.183333	3.30333	-3.07662	Down	4.17138	Up	Similar to cytokinin-O-glucosyltransferase 2.
Os07g0246200	416.28	202.793	426.013	-1.03754	Down	1.07089	Up	Similar to Calreticulin (Fragment).
Os04g0461800	1.93333	0.273333	0.99	-2.82236	Down	1.85677	Up	Actin-binding FH2 domain containing protein.
Os07g0624700	40.2267	14.9933	33.9467	-1.42383	Down	1.17895	Up	UMP/CMP kinase a (EC 2.7.1.48).
Os07g0654700	2.68333	1.11	2.99667	-1.27347	Down	1.4328	Up	Similar to BLE2 protein.
Os06g0696450	1.03	0.0233333	3.07333	-5.46411	Down	7.04127	Up	Hypothetical protein.
Os03g0231700	12.1267	4.25667	8.60667	-1.51039	Down	1.01573	Up	Similar to squalene monooxygenase.
Os09g0421200	1.46	0.336667	1.26333	-2.11658	Down	1.90784	Up	Conserved hypothetical protein.
Os10g0402200	1.66	0.25	1.17	-2.73118	Down	2.22651	Up	Origin recognition complex subunit 3 Lateral root development
Os10g0113100	6.55667	2.32333	8.02667	-1.49677	Down	1.7886	Up	Aldo/keto reductase family protein.
Os01g0294500	24.6833	1.02	8.15333	-4.5969	Down	2.99882	Up	Similar to Class III peroxidase 9.
Os03g0127700	7.16	1.14333	3.46	-2.64671	Down	1.59753	Up	Serine/threonine protein kinase-related domain containing protein.
Os11g0557800	64.63	7.12333	62.3633	-3.18158	Down	3.13007	Up	Conserved hypothetical protein.
Os02g0833900	18.9567	1.62	12.5033	-3.54864	Down	2.94825	Up	Similar to Peroxidase 64 precursor (EC 1.11.1.7) (Atperox P64) (PRXR4) (ATP17a).
Os01g0226666	1.16667	0.446667	1.60333	-1.38512	Down	1.8438	Up	Hypothetical protein.
Os05g0440800	9.23667	3.61	7.75667	-1.35537	Down	1.10344	Up	Serine/threonine protein kinase domain containing protein.
Os01g0813800	2.01333	0.316667	1.26667	-2.66855	Down	2	Up	Similar to Beta-glucosidase 3.
Os03g0174200	4.77667	1.13333	5.01667	-2.07543	Down	2.14616	Up	Conserved hypothetical protein.
Os05g0394200	5.23667	1.6	3.55667	-1.71058	Down	1.15245	Up	Hypothetical conserved gene.
Os09g0517600	2.86	0.906667	1.96667	-1.65737	Down	1.11711	Up	Class I formin protein Regulation of grain size Control of microtubule and actin filament cytoskeleton systems
Os06g0294600	7.55	1.25	4.69667	-2.59455	Down	1.90971	Up	Cytochrome P450 family protein.
Os05g0573200	7.09	1.23	3.52	-2.52713	Down	1.51692	Up	Similar to Isocitrate dehydrogenase (Fragment).
Os01g0605500	3.11333	0.4	2.79667	-2.96039	Down	2.80564	Up	Kinesin motor region domain containing protein.
Os09g0345300	1.72667	0.17	0.673333	-3.34438	Down	1.98579	Up	Similar to Receptor-like serine/threonine kinase.
Os12g0487500	5.48333	1.60333	3.57	-1.77398	Down	1.15485	Up	Hypothetical conserved gene.
Os11g0169400	1.24333	0.17	0.853333	-2.87061	Down	2.32757	Up	Similar to Zinc finger C2H2 type family protein expressed.
Os09g0482900	2.07667	0.836667	1.83667	-1.31154	Down	1.13436	Up	UDP-glucuronosyl/UDP-glucosyltransferase family protein.
Os01g0904400	3.26	0.98	2.23333	-1.73402	Down	1.18834	Up	Similar to Chromosome assembly protein homolog.
Os12g0510900	15.3367	5.85	21.8767	-1.39048	Down	1.90288	Up	Similar to LIM domain protein WLIM-1.
Os02g0764200	4.93	0.616667	2.70667	-2.99902	Down	2.13395	Up	Similar to Xyloglucan fucosyltransferase-like [Oryza sativa (japonica cultivar-group)].
Os02g0114100	3.96	0.36	1.72333	-3.45943	Down	2.25913	Up	Protein of unknown function DUF6 transmembrane domain containing protein.
Os04g0613200	18.0067	5.69333	14.87	-1.66119	Down	1.38506	Up	Pectin lyase fold/virulence factor domain containing protein.
Os03g0196500	1.38333	0.403333	1.29667	-1.7781	Down	1.68476	Up	Cyclin-like F-box domain containing protein.
Os02g0518000	1.19667	0.44	2.38333	-1.44345	Down	2.43741	Up	C2 calcium-dependent membrane targeting domain containing protein.
Os12g0209300	1.62667	0.293333	0.836667	-2.47131	Down	1.51211	Up	Similar to ATPase AAA family protein.
Os01g0668100	77.12	9.49	66.1733	-3.02263	Down	2.80177	Up	Similar to Arabinogalactan-like protein.
Os01g0868600	12.23	0.476667	5.49333	-4.6813	Down	3.52663	Up	Hypothetical conserved gene.
Os10g0555600	178.23	66.8533	140.52	-1.41467	Down	1.0717	Up	Beta-expansin precursor.
Os07g0529700	24.1767	5.08333	18.4933	-2.24977	Down	1.86316	Up	Similar to Xyloglucan endotransglucosylase/hydrolase 1.
Os06g0179400	1.90333	0.206667	1.36667	-3.20315	Down	2.72528	Up	Hypothetical protein.
Os03g0758500	35.6567	17.11	37.3033	-1.05933	Down	1.12446	Up	Cupredoxin domain containing protein.
Os01g0580500	1.29	0.543333	2.11333	-1.24746	Down	1.95961	Up	ACC oxidase Ethylene biosynthesis
Os05g0433800	3.36333	0.001	1.34333	-11.7157	Down	10.3916	Up	Protein of unknown function DUF1218 domain containing protein.
Os03g0857500	12.4533	4.15667	10.8233	-1.58303	Down	1.38065	Up	Protein of unknown function DUF303 acetylesterase putative domain containing protein.
Os03g0703100	17.6667	6.03	13.31	-1.5508	Down	1.14228	Up	Similar to Beta-glucosidase.
Os05g0528101	2.33667	0.7	2.19333	-1.73903	Down	1.6477	Up	Hypothetical gene.
Os01g0618200	4.33	1.4	3.73	-1.62894	Down	1.41375	Up	Protein phosphatase 2C family protein.
Os06g0217900	2.01	0.963333	2.12333	-1.06109	Down	1.14022	Up	Similar to Cyclin-D3-1.
Os11g0180600	1.49667	0.44	1.16667	-1.76618	Down	1.40682	Up	Similar to Type III restriction enzyme res subunit family protein expressed.
Os12g0605500	12.58	4.08667	10.5	-1.62214	Down	1.36139	Up	Tesmin/TSO1-like CXC domain containing protein.
Os06g0311000	0.65	0.04	0.463333	-4.02237	Down	3.53398	Up	Hypothetical conserved gene.
Os05g0563600	210.983	82.33	217.533	-1.35764	Down	1.40175	Up	FAS1 domain domain containing protein.
Os03g0691500	1.20333	0.273333	0.833333	-2.1383	Down	1.60823	Up	Hypothetical conserved gene.
Os04g0689000	291.227	18.9667	78.9	-3.9406	Down	2.05656	Up	Similar to Peroxidase (EC 1.11.1.7).
Os12g0478400	1.39333	0.36	1.84	-1.95247	Down	2.35364	Up	EGF-type aspartate/asparagine hydroxylation site domain containing protein.
Os04g0494800	2.97333	0.293333	1.77	-3.34147	Down	2.59314	Up	Protein of unknown function DUF642 family protein.
Os02g0124600	3.30667	0.116667	1.10333	-4.82491	Down	3.2414	Up	Similar to FAD binding domain containing protein.
Os08g0547800	4.15	1.84	4.31	-1.17341	Down	1.22798	Up	Alpha/beta hydrolase fold-3 domain containing protein.
MSTRG.33261	4.78333	0.32	2.33667	-3.90187	Down	2.86831	Up	--
Os02g0646200	12.6067	5.03333	22.2767	-1.3246	Down	2.14595	Up	Zinc finger B-box domain containing protein.
Os02g0489800	3.01	0.916667	2.00667	-1.71529	Down	1.13033	Up	Similar to SKIP interacting protein 18 (Fragment).
Os06g0234900	0.466667	0.0333333	0.553333	-3.80735	Down	4.05311	Up	Domain of unknown function DUF231 plant domain containing protein.
Os12g0149000	3.70333	0.923333	3.38	-2.0039	Down	1.8721	Up	Protein of unknown function DUF868 plant domain containing protein.
Os04g0618800	0.0933333	0.001	0.14	-6.54432	Down	7.12928	Up	Hypothetical protein.
Os01g0236000	3.17667	1.2	2.92667	-1.40448	Down	1.28622	Up	Conserved hypothetical protein.
Os02g0503700	0.676667	0.0133333	1.09	-5.66534	Down	6.35315	Up	Similar to Cytochrome P450 CYP81L6.
Os06g0663800	11.1733	3.80667	7.65	-1.55346	Down	1.00693	Up	Similar to FKBP-type peptidyl-prolyl cis-trans isomerase 3 chloroplast precursor (EC 5.2.1.8) (PPIase) (Rotamase) (AtFKBP13) (FK506 binding protein 1).
Os12g0159000	80.7267	23.4633	76.9533	-1.78264	Down	1.71358	Up	Harpin-induced 1 domain containing protein.
Os11g0439600	4.23	0.393333	3.11333	-3.42683	Down	2.98464	Up	Similar to Nod factor binding lectin-nucleotide phosphohydrolase.
Os06g0266400	81.38	15.7167	53.5133	-2.37238	Down	1.7676	Up	Similar to chemocyanin.
Os01g0740350	2.18	0.27	1.15667	-3.0133	Down	2.09894	Up	Hypothetical gene.
Os02g0739400	44.9167	20.0533	64.61	-1.16341	Down	1.68792	Up	Similar to Avr9/Cf-9 rapidly elicited protein 231 precursor.
Os09g0261900	1.37	0.316667	1.2	-2.11314	Down	1.922	Up	Similar to cDNA clone:J023055B18 full insert sequence.
Os03g0324600	4.90333	1.73	3.48333	-1.50299	Down	1.0097	Up	NB-ARC domain containing protein.
Os03g0418000	10.8033	0.76	7.35667	-3.82933	Down	3.27498	Up	Similar to Basic endochitinase 2 precursor (EC 3.2.1.14).
Os03g0767650	2.24333	0.383333	1.4	-2.54897	Down	1.86876	Up	Hypothetical gene.
Os07g0510400	21.7033	3.96333	10.07	-2.45313	Down	1.34528	Up	UDP-glucuronosyl/UDP-glucosyltransferase family protein.
Os12g0137700	9.08333	4.49	11.6733	-1.01651	Down	1.37843	Up	Sulfotransferase family protein.
Os06g0247000	3.39667	0.996667	5.86667	-1.76894	Down	2.55736	Up	Similar to Avr9/Cf-9 rapidly elicited protein 231.
Os07g0408500	3.44333	0.683333	2.41333	-2.33314	Down	1.82037	Up	Similar to Rac GTPase activating protein 3 (Fragment).
Os09g0456100	2.37667	0.366667	1.11667	-2.6964	Down	1.60666	Up	Remorin_C-containing protein Control of panicle length
Os04g0436000	3.30667	1.20333	3.97	-1.45834	Down	1.7221	Up	Conserved hypothetical protein.
Os04g0531100	60.6767	22.7067	46.9467	-1.41803	Down	1.04791	Up	Small C2-domain protein consisting of a single C2 domain Phloem protein Signaling pathway involving Ca<sup>2+</sup> ions Defense response
Os10g0438500	1.69667	0.38	1.35333	-2.15863	Down	1.83245	Up	Cyclin-like F-box domain containing protein.
Os05g0497150	4.99667	1.03	3.12333	-2.27832	Down	1.60044	Up	Hypothetical conserved gene.
Os06g0727700	3.05333	0.33	1.18	-3.20985	Down	1.83825	Up	Protein of unknown function DUF707 family protein.
Os03g0212600	4.87667	1.53333	4.03	-1.66922	Down	1.39411	Up	Targeting for Xklp2 family protein.
Os12g0549700	4.55667	1.27	2.68	-1.84315	Down	1.0774	Up	Hypothetical conserved gene.
Os01g0899800	3.27	0.863333	2.15667	-1.9213	Down	1.32081	Up	Pathogenesis-related transcriptional factor and ERF domain containing protein.
Os04g0308500	12.0233	0.766667	25.8167	-3.97109	Down	5.07356	Up	Similar to H0211A12.12 protein.
Os06g0513781	164.32	14.91	232.163	-3.46216	Down	3.96079	Up	Conserved hypothetical protein.
Os09g0348600	0.353333	0.001	0.24	-8.46489	Down	7.90689	Up	Protein kinase catalytic domain domain containing protein.
Os06g0513050	477.283	34.7167	814.307	-3.78115	Down	4.55187	Up	Conserved hypothetical protein.
MSTRG.20651	28.9167	4.13667	15.9733	-2.80536	Down	1.94912	Up	--
Os10g0174751	0.253333	0.001	0.166667	-7.98489	Down	7.38082	Up	Hypothetical protein.
Os09g0241100	2.67	0.61	1.98667	-2.12996	Down	1.70347	Up	Similar to nucleotide binding.
Os06g0636700	1.15667	0.166667	0.99	-2.79494	Down	2.57046	Up	Esterase SGNH hydrolase-type domain containing protein.
Os08g0129600	1.62	0.473333	1.04333	-1.77507	Down	1.14027	Up	Conserved hypothetical protein.
Os02g0628200	30.53	12.6033	27.8233	-1.27642	Down	1.14249	Up	Protein of unknown function DUF250 domain containing protein.
Os09g0508500	12.7667	4.15	8.36333	-1.6212	Down	1.01097	Up	Similar to Isoform 2 of Double-stranded RNA-binding protein 5.
Os12g0551200	4.00333	0.963333	2.00667	-2.05509	Down	1.05869	Up	Armadillo-like helical domain containing protein.
Os05g0436100	7.76667	1.50667	5.39333	-2.36594	Down	1.83982	Up	Similar to predicted protein.
Os06g0131800	2.34	0.4	2.37667	-2.54844	Down	2.57087	Up	Hypothetical protein.
Os04g0625000	18.43	4.78667	10.2333	-1.94496	Down	1.09618	Up	Conserved hypothetical protein.
Os06g0256900	2.53667	0.996667	2.23667	-1.34775	Down	1.16617	Up	Similar to Endo-beta-1 4-glucanase precursor (EC 3.2.1.4).
Os01g0700900	2.24	0.24	1.56667	-3.22239	Down	2.70659	Up	Similar to Cytochrome P450 monooxygenase.
Os05g0167600	11.54	2.38	9.78667	-2.27761	Down	2.03986	Up	Conserved hypothetical protein.
Os03g0113500	6.63667	1.07333	3.51333	-2.62836	Down	1.71074	Up	Conserved hypothetical protein.
Os03g0659800	3.51667	1.09333	2.8	-1.68548	Down	1.35669	Up	Similar to H0525G02.7 protein.
Os03g0368900	234.683	54.63	118.74	-2.10295	Down	1.12004	Up	Haem peroxidase family protein.
Os08g0380100	8.43	3.40667	9.54	-1.30717	Down	1.48563	Up	Similar to Polygalacturonase isoenzyme 1 beta subunit (Fragment).
Os03g0214100	12.4067	2.25	9.69333	-2.46312	Down	2.10707	Up	Replication protein A1.
Os06g0138900	4.10667	1.13667	4.16	-1.85316	Down	1.87177	Up	Conserved hypothetical protein.
Os02g0588500	24.8567	7.91	22.2767	-1.65188	Down	1.49378	Up	Hypothetical conserved gene.
Os07g0636800	47.96	8.54	28.9433	-2.48952	Down	1.76092	Up	Plant disease resistance response protein family protein.
Os02g0175400	22.13	4.73333	16.8033	-2.22508	Down	1.82782	Up	Similar to Vacuolar H(+)-ATPase subunit A (Fragment).
Os09g0395600	2.95667	0.546667	2.19333	-2.43524	Down	2.00439	Up	Concanavalin A-like lectin/glucanase domain containing protein.
Os02g0730400	5.97667	2.67667	5.4	-1.1589	Down	1.01252	Up	Six-bladed beta-propeller TolB-like domain containing protein.
Os04g0177300	1.11667	0.12	0.896667	-3.21809	Down	2.90154	Up	HIP116 Rad5p N-terminal domain containing protein.
Os04g0376700	6.51667	2.45333	6.92667	-1.40939	Down	1.49742	Up	Similar to ER lumen protein retaining receptor (HDEL receptor) (PGP169-12).
Os12g0163750	5.39	0.34	1.97333	-3.98668	Down	2.53703	Up	Hypothetical protein.
Os11g0696200	52.86	17.7033	35.8133	-1.57816	Down	1.01648	Up	ATP citrate lyase beta (Fragment).
Os07g0586200	3.53	1.24333	4.61667	-1.50546	Down	1.89264	Up	Similar to Esterase precursor (EC 3.1.1.-) (Early nodule-specific protein homolog) (Latex allergen Hev b 13).
Os04g0671500	1.43667	0.583333	2.25333	-1.30033	Down	1.94967	Up	Hypothetical protein.
MSTRG.10231	1.07	0.0133333	0.783333	-6.32643	Down	5.87652	Up	NBS-LRR-like resistance protein, partial [Oryza sativa]
Os02g0193600	5.2	1.28333	3.73333	-2.01862	Down	1.54057	Up	Mitotic checkpoint serine/threonine protein kinase Bub1 domain containing protein.
Os09g0551800	0.553333	0.06	0.35	-3.20511	Down	2.54432	Up	Helicase-like DEXD box c2 type domain containing protein.
Os04g0554500	112.627	0.69	24.12	-7.35074	Down	5.12749	Up	Similar to RCc3 protein.
Os06g0347966	2.60333	1.09333	2.99	-1.25163	Down	1.45141	Up	Conserved hypothetical protein.
Os03g0564600	11.5833	4.42333	10.73	-1.38884	Down	1.27844	Up	Protein of unknown function DUF26 domain containing protein.
Os02g0675700	4.59333	0.623333	3.85	-2.88147	Down	2.62678	Up	Protein of unknown function DUF248 methyltransferase putative family protein.
Os01g0347500	117.013	21.6	64.18	-2.43757	Down	1.57109	Up	Similar to Papain-like cysteine proteinase (Fragment).
Os08g0275200	4.74667	2.12667	5.05	-1.15832	Down	1.24769	Up	Protein kinase core domain containing protein.
Os07g0481100	2.95333	0.426667	1.53333	-2.79116	Down	1.84549	Up	Rop nucleotide exchanger PRONE domain containing protein.
Os05g0525200	0.746667	0.0166667	0.296667	-5.48543	Down	4.15381	Up	Hypothetical protein.
Os01g0929200	17.46	2.69667	9.2	-2.6948	Down	1.77046	Up	Serine/threonine protein kinase domain containing protein.
Os11g0249300	0.846667	0.136667	0.706667	-2.63113	Down	2.37037	Up	Conserved hypothetical protein.
Os03g0749300	815.493	255.463	611.08	-1.67456	Down	1.25825	Up	Similar to Exoglucanase precursor.
Os03g0184500	4.24	0.97	3.29667	-2.12801	Down	1.76495	Up	Transcriptional factor B3 family protein.
Os02g0158100	9.93667	3.03333	9.08	-1.71186	Down	1.58179	Up	EF hand domain containing protein.
Os01g0710100	2.19333	0.37	1.93667	-2.56753	Down	2.38798	Up	Hypothetical conserved gene.
MSTRG.550	7.48667	0.59	3.04333	-3.66554	Down	2.36687	Up	PREDICTED: myb-related protein Hv33-like [Oryza sativa Japonica Group]
Os04g0482100	4.16667	0.36	2.37333	-3.53282	Down	2.72085	Up	Similar to H0510A06.16 protein.
Os08g0160500	116.06	21.8733	70.3	-2.40763	Down	1.68435	Up	MLG (mixed-linkage glucan) synthase Biosynthesis of MLG (cell wall polysaccharide)
Os04g0314500	1.11	0.243333	1.40667	-2.18955	Down	2.53127	Up	Hypothetical protein.
Os08g0492000	5.73667	0.94	2.29333	-2.60948	Down	1.28671	Up	Similar to Glutathione transporter.
Os09g0451500	56.5833	24.2833	62.9367	-1.22041	Down	1.37393	Up	Similar to protein disulfide isomerase.
Os12g0184300	0.796667	0.09	0.88	-3.14598	Down	3.28951	Up	Conserved hypothetical protein.
Os06g0338700	4.01	0.56	1.85667	-2.8401	Down	1.72922	Up	Similar to Primary amine oxidase.
Os03g0712100	1.62333	0.363333	1.50333	-2.15959	Down	2.0488	Up	Cell division cycle-associated protein domain containing protein.
Os09g0452200	12.4033	2.89	10.93	-2.10159	Down	1.91915	Up	Lysin motif-containing protein Pattern recognition receptor Peptidoglycan and chitin perception in innate immunity
MSTRG.1383	1.9	0.12	1.05667	-3.98489	Down	3.13841	Up	PREDICTED: peroxidase 2-like [Oryza sativa Japonica Group]
Os05g0159300	23.8833	7.79333	19.4933	-1.61569	Down	1.32267	Up	Similar to Alpha-L-fucosidase 2.
Os09g0540600	5.08	2.26333	6.17667	-1.16638	Down	1.44838	Up	Similar to WD-40 repeat protein MSI1.
Os10g0394200	4.54	1.01	3.85	-2.16834	Down	1.9305	Up	Similar to subtilase family protein.
Os09g0561000	27.75	3.43333	10.29	-3.01481	Down	1.58356	Up	Similar to Wall-associated kinase-like 2.
Os01g0179600	4.25333	1.85	5.41333	-1.20107	Down	1.54899	Up	UDP-glucuronosyl/UDP-glucosyltransferase family protein.
Os01g0132000	414.25	38.8133	186.757	-3.41588	Down	2.26654	Up	Similar to Wound-induced protease inhibitor (WIP1).
Os07g0634600	43.9633	13.68	35.2167	-1.68423	Down	1.36419	Up	Similar to Pectin acetylesterase (Fragment).
Os03g0587200	7.28333	1.91	6.18	-1.93103	Down	1.69403	Up	Kinesin motor region domain containing protein.
Os04g0457200	3.30667	1.54667	3.27	-1.09622	Down	1.08013	Up	Similar to H0523F07.11 protein.
Os12g0272800	1.76	0.423333	0.983333	-2.05571	Down	1.21589	Up	Typical coiled-coil nucleotide binding leucine rich repeat (CC-NB-LRR) type protein Defense response
Os10g0554001	0.843333	0.183333	0.623333	-2.20163	Down	1.76553	Up	Conserved hypothetical protein.
Os05g0113900	40.1667	10.5833	24.24	-1.9242	Down	1.1956	Up	Similar to Histone H2A.
Os05g0149500	3.87667	0.723333	2.03	-2.42208	Down	1.48875	Up	Similar to lipopolysaccharide-modifying protein.
Os04g0465300	12.2633	1.42	6.41	-3.11039	Down	2.17443	Up	A member of the GAST (gibberellin (GA)-Stimulated Transcript) family Cell division Differentiation of panicles
Os03g0111200	54.23	10.9367	26.9067	-2.30992	Down	1.29879	Up	Similar to Remorin.
Os05g0163300	6.83	0.373333	1.80333	-4.19335	Down	2.27213	Up	Similar to Arabinogalactan protein-like.
Os06g0284200	17.3333	6.11667	14.2367	-1.50273	Down	1.21879	Up	Protein of unknown function DUF246 plant family protein.
Os09g0501100	3.12667	0.193333	1.19	-4.01546	Down	2.6218	Up	Protein of unknown function DUF568 domain containing protein.
Os09g0300800	14.15	1.07667	3.90333	-3.71616	Down	1.85814	Up	Protein of unknown function DUF247 plant family protein.
Os01g0508500	33.2433	1.27667	4.29667	-4.70261	Down	1.75084	Up	Conserved hypothetical protein.
Os03g0861400	24.34	4.78667	11.3033	-2.34624	Down	1.23966	Up	Hypothetical conserved gene.
Os09g0304500	1.40667	0.14	1.5	-3.32878	Down	3.42146	Up	Protein of unknown function DUF247 plant family protein.
Os07g0250900	13.5	2.75	6.43	-2.29546	Down	1.22539	Up	Harpin-induced 1 domain containing protein.
Os08g0533900	2.17333	0.001	0.366667	-11.0857	Down	8.51833	Up	Hypothetical conserved gene.
Os03g0155900	8.35333	0.21	5.22	-5.31389	Down	4.63559	Up	Alpha-expansin OsEXPA18.
Os01g0929000	6.21333	2.25	4.65333	-1.46544	Down	1.04834	Up	Similar to aminopeptidase.
Os01g0878000	1.96667	0.25	1.16333	-2.97575	Down	2.21826	Up	Conserved hypothetical protein.
Os03g0703000	137.99	35.0267	97.6933	-1.97804	Down	1.47981	Up	Similar to Beta-glucosidase.
Os09g0567800	7.23333	0.826667	3.03667	-3.12928	Down	1.87711	Up	Hypothetical conserved gene.
Os05g0525600	1.43	0.17	0.753333	-3.07241	Down	2.14775	Up	Protein kinase catalytic domain domain containing protein.
Os12g0120000	1.61	0.446667	1.25333	-1.84979	Down	1.4885	Up	Protein of unknown function DUF936 plant family protein.
Os06g0115700	17.7767	2.04	15.09	-3.12334	Down	2.88695	Up	Conserved hypothetical protein.
Os11g0271100	2.56	0.79	1.86	-1.69622	Down	1.23538	Up	Similar to Blast and wounding induced mitogen-activated protein kinase.
Os12g0409800	3.69	1.10333	3.69333	-1.74175	Down	1.74305	Up	Conserved hypothetical protein.
Os04g0554600	39.1633	0.001	5.38667	-15.2572	Down	12.3952	Up	Similar to RCc3 protein.
Os09g0400300	6.07333	0.713333	4.44333	-3.08984	Down	2.63899	Up	Similar to Cinnamyl alcohol dehydrogenase (EC 1.1.1.195).
Os07g0637700	9.40667	2.66333	11.9967	-1.82045	Down	2.17133	Up	Similar to Disease resistance-responsive family protein.
Os10g0147400	11.5467	2.61667	8.04333	-2.14167	Down	1.62006	Up	Similar to Auxin influx carrier protein.
Os04g0461600	11.0833	2.88	6.76	-1.94425	Down	1.23095	Up	Similar to Fw2.2.
Os02g0699500	18.57	4.49	10.5	-2.04819	Down	1.2256	Up	Conserved hypothetical protein.
Os10g0439924	7.49333	1.11667	3.30333	-2.74641	Down	1.56472	Up	Cytochrome P450 family protein.
Os08g0506400	4.68	0.513333	2.96333	-3.18854	Down	2.52925	Up	Serine/threonine protein kinase domain containing protein.
Os01g0618700	3.17667	0.47	1.92333	-2.75678	Down	2.03288	Up	Lipase class 3 family protein.
Os04g0518800	2.42667	0.646667	2.85	-1.90788	Down	2.13987	Up	Cytokinin synthesis enzyme Cytokinin-activating enzyme Regulation of awn length and grain production
Os01g0110100	1.29	0.62	1.63667	-1.05703	Down	1.40042	Up	Phosphate (Pi) transporter Pi homeostasis
Os01g0611000	86.02	19.7767	74.3567	-2.12087	Down	1.91066	Up	Protein of unknown function DUF642 domain containing protein.
Os01g0229400	5.50667	1.55	5.22333	-1.82891	Down	1.7527	Up	Similar to Rac-like GTP-binding protein 1.
Os11g0247500	1.17	0.353333	1.33667	-1.72741	Down	1.91954	Up	Conserved hypothetical protein.
Os04g0642000	37.8533	9.13333	21.85	-2.05121	Down	1.25842	Up	Similar to MDR-like p-glycoprotein.
Os07g0410700	7.74333	1.78333	3.84333	-2.11838	Down	1.10778	Up	Similar to Ethylene-responsive element binding protein 1.
Os10g0562550	2.33333	0.4	1.66667	-2.54432	Down	2.05889	Up	Hypothetical gene.
Os03g0760500	4.33333	1.30667	3.93	-1.72959	Down	1.58864	Up	Cytochrome P450 family protein.
Os01g0757400	21.1133	2.70333	13.2167	-2.96534	Down	2.28955	Up	Similar to Katanin p60 ATPase-containing subunit A1 (EC 3.6.4.3) (Katanin p60 subunit A1) (p60 katanin). Splice isoform 2.
Os01g0937100	5.75333	2.13333	11.9067	-1.43129	Down	2.48059	Up	Similar to Xylanase inhibitor precursor (Xylanase inhibitor TAXI-I).
Os05g0525400	2.74	0.173333	1.19667	-3.98255	Down	2.7874	Up	Malectin-like carbohydrate-binding domain domain containing protein.
Os06g0273200	4.34667	0.64	3.02667	-2.76377	Down	2.24159	Up	Protein of unknown function DUF231 plant domain containing protein.
Os07g0429700	5647.95	397.793	948.03	-3.82764	Down	1.25291	Up	Similar to Thionin-like peptide.
Os04g0687200	4.46667	1.03	2.64667	-2.11655	Down	1.36153	Up	Similar to H0701F11.5 protein.
Os12g0502300	3.70667	0.85	2.32667	-2.12459	Down	1.45273	Up	Similar to Cyclin A-like protein (Fragment).
Os09g0524800	26.36	12.1967	27.8167	-1.11186	Down	1.18946	Up	Apoptosis regulator Bcl-2 protein BAG domain containing protein.
Os08g0163100	2.72333	0.953333	2.37	-1.51432	Down	1.31383	Up	Nuf2 family protein.
Os03g0186900	33.53	13.7233	36.9467	-1.28882	Down	1.42881	Up	Radc1.
Os06g0300000	1.64667	0.443333	2.22333	-1.89308	Down	2.32626	Up	Short-chain dehydrogenase/reductase SDR domain containing protein.
Os05g0561400	13.0133	3.19667	27.46	-2.02535	Down	3.10269	Up	Conserved hypothetical protein.
Os10g0458900	1.62333	0.24	1.87667	-2.75785	Down	2.96707	Up	Exostosin-like family protein.
Os03g0172850	9.09333	2.16667	9.29333	-2.06933	Down	2.10072	Up	Proteinase inhibitor I25 cystatin conserved region domain containing protein.
Os05g0512000	1.51667	0.556667	1.63	-1.44602	Down	1.54999	Up	Zinc finger RING/FYVE/PHD-type domain containing protein.
Os06g0293500	16.3767	4.42667	10.2	-1.88735	Down	1.20428	Up	Conserved hypothetical protein.
Os02g0814400	7.62	0.9	2.37333	-3.08179	Down	1.39892	Up	Cytochrome c monohaem domain containing protein.
Os06g0334300	11.6233	3.53	7.3	-1.71928	Down	1.04823	Up	Similar to Resistance protein candidate (Fragment).
Os04g0412800	3.95667	0.523333	3.02	-2.91848	Down	2.52875	Up	Thioredoxin fold domain containing protein.
Os10g0579800	8.51333	3.63333	9.09333	-1.22843	Down	1.32352	Up	TGF-beta receptor type I/II extracellular region family protein.
Os01g0645000	22.9533	8.69	25.0033	-1.40128	Down	1.52469	Up	Similar to TIS11 protein (dTIS11).
Os12g0628400	10.2233	1.94333	8.21667	-2.39526	Down	2.08002	Up	Fatty acid 2-hydroxylase Resistance to rice blast fungus infection
Os09g0255900	7.57333	2.76	6.03	-1.45626	Down	1.12749	Up	Protein of unknown function DUF247 plant family protein.
Os03g0302900	3.8	1.06333	2.46	-1.83741	Down	1.21006	Up	Conserved hypothetical protein.
Os05g0362100	3.82333	1.71	5.51667	-1.16083	Down	1.6898	Up	Similar to Protein MFP-b.
Os04g0504200	4.07333	1.2	4.17	-1.76318	Down	1.79701	Up	Conserved hypothetical protein.
Os10g0490100	44.3567	13.9467	33.1	-1.66923	Down	1.24691	Up	Virulence factor pectin lyase fold family protein.
Os03g0297800	10.3367	1.83333	6.66667	-2.49523	Down	1.8625	Up	Similar to Leucine Rich Repeat family protein expressed.
Os04g0499100	2.96	1.28667	2.77333	-1.20196	Down	1.10798	Up	Biopterin transport-related protein BT1 family protein.
Os01g0588100	33.7367	10.6433	102.35	-1.66437	Down	3.26549	Up	Similar to Hypersensitive-induced response protein.
Os11g0618700	12.4367	5.38667	13.93	-1.20714	Down	1.37073	Up	Protein of unknown function DUF594 domain containing protein.
Os11g0169800	8.06	2.50333	6.95667	-1.68693	Down	1.47455	Up	Similar to Long-chain-fatty-acid--CoA ligase 4 (EC 6.2.1.3) (Long-chain acyl-CoA synthetase 4) (LACS 4).
Os11g0128400	1.44333	0.236667	0.93	-2.60848	Down	1.97437	Up	CDC45-like protein family protein.
Os04g0472700	2.99333	0.846667	2.63	-1.82189	Down	1.6352	Up	Similar to H0305E08.4 protein.
Os08g0452100	1.51667	0.46	1.53333	-1.7212	Down	1.73697	Up	Similar to Subtilisin-like serine protease.
Os03g0607600	2.61667	0.556667	2.58333	-2.23284	Down	2.21435	Up	Similar to Cyclin-A3-1.
Os10g0524600	5.41333	1.63333	4.35333	-1.7287	Down	1.4143	Up	Peptidase S8 subtilisin-related domain containing protein.
Os06g0149700	12.0267	5.6	12.14	-1.10274	Down	1.11627	Up	Cysteine synthase (EC 4.2.99.8).
Os06g0194400	2.87	0.986667	2.76333	-1.54042	Down	1.48577	Up	Transcriptional factor B3 family protein.
Os02g0617100	1.59667	0.373333	1.89333	-2.09653	Down	2.34239	Up	Conserved hypothetical protein.
Os07g0633400	0.583333	0.0433333	0.533333	-3.75077	Down	3.62149	Up	IQ calmodulin-binding region domain containing protein.
Os01g0249700	3.25667	0.23	2.30333	-3.82369	Down	3.32402	Up	Heavy metal-associated domain HMA domain containing protein.
Os01g0710700	12.47	2.45667	5.80667	-2.34369	Down	1.24101	Up	Lipase class 3 family protein.
Os07g0663800	131.22	18.6833	42.98	-2.81216	Down	1.20191	Up	Similar to Oxidoreductase short chain dehydrogenase/reductase family protein expressed.
Os03g0372950	13.3867	4.83	11.7967	-1.4707	Down	1.28828	Up	Hypothetical gene.
Os06g0671800	12.3167	2.21667	6.04667	-2.47415	Down	1.44775	Up	Similar to patellin-5.
Os04g0413500	26.8333	4.83333	17.18	-2.47294	Down	1.82964	Up	Cell-wall invertase Carbon partitioning during early grain filling
Os04g0472200	6.83333	0.556667	2.25333	-3.6177	Down	2.01718	Up	Similar to H0418A01.11 protein.
Os05g0150733	1.79333	0.503333	2.38333	-1.83306	Down	2.24339	Up	Similar to pro-resilin.
Os07g0255900	0.973333	0.0733333	0.713333	-3.73039	Down	3.28204	Up	Domain of unknown function DUF231 plant domain containing protein.
Os09g0416900	1.65	0.48	1.56333	-1.78136	Down	1.70352	Up	Armadillo-like helical domain containing protein.
Os11g0484300	9.40333	1.98333	6.66667	-2.24525	Down	1.74904	Up	Similar to Mcm2-prov protein.
Os02g0639600	5.28	1.41	4.32333	-1.90484	Down	1.61645	Up	Similar to MLD (Degenerative spermatocyte homolog 1 lipid desaturase) (Migration-inducing gene 15 protein) (Sphingolipid delta 4 desaturase protein DES1).
Os05g0133401	5.80667	1.75667	4.46667	-1.72487	Down	1.34636	Up	Esterase SGNH hydrolase-type domain containing protein.
Os03g0115000	23.21	5.59667	21.2867	-2.05211	Down	1.92731	Up	Cupredoxin domain containing protein.
Os08g0479300	5.37667	1.12667	2.49	-2.25465	Down	1.14408	Up	Cyclin A/B/D/E domain containing protein.
Os01g0739700	1.70667	0.636667	2.36333	-1.42257	Down	1.89221	Up	Glycoside hydrolase family 17 protein.
Os06g0697000	4.68667	1.50667	4.84333	-1.6372	Down	1.68464	Up	Similar to Xyloglucan endo-transglucosylase/hydrolase 1.
Os09g0399800	179.383	28.85	139.913	-2.6364	Down	2.27789	Up	Cinnamyl alcohol dehydrogenase (EC 1.1.1.195).
Os10g0563500	2.88667	1.02667	2.75667	-1.49144	Down	1.42496	Up	Protein kinase core domain containing protein.
Os06g0726800	8.64	2.11333	6.40333	-2.03151	Down	1.5993	Up	G2/mitotic-specific cyclin 2 (B-like cyclin) (CycOs2).
MSTRG.19371	1.76	0.0866667	1.19	-4.34395	Down	3.77934	Up	OSJNBa0056L23.23 [Oryza sativa Japonica Group]
Os12g0267900	3.53667	0.93	2.88	-1.92709	Down	1.63077	Up	Zinc finger RING/FYVE/PHD-type domain containing protein.
Os05g0219900	0.93	0.133333	1.24333	-2.80219	Down	3.2211	Up	C4-dicarboxylate transporter/malic acid transport protein family protein.
Os05g0431750	7.29333	2.28	6.62333	-1.67754	Down	1.53852	Up	Hypothetical protein.
Os06g0653100	12.74	5.74	12.3533	-1.15024	Down	1.10578	Up	Senescence-associated protein 5.
Os04g0443900	0.983333	0.0866667	1.52667	-3.50413	Down	4.13876	Up	Similar to RuBisCO large subunit-binding protein subunit beta chloroplastic.
MSTRG.31680	13.6	0.1	1.34667	-7.08746	Down	3.75132	Up	--
MSTRG.5945	4.07667	0.506667	3.11	-3.00828	Down	2.61781	Up	--
Os02g0542500	16.9833	2.85667	6.03333	-2.57172	Down	1.07862	Up	Similar to NF-180.
Os11g0614400	46.73	9.38667	27.5833	-2.31566	Down	1.55511	Up	Similar to Patatin-like protein 1.
Os12g0438400	0.996667	0.0466667	0.363333	-4.41665	Down	2.96083	Up	Hypothetical conserved gene.
Os11g0270000	27.22	11.51	37.27	-1.24178	Down	1.69513	Up	Crotonase core domain containing protein.
Os08g0520000	5.61	1.98333	4.53667	-1.50007	Down	1.19371	Up	Mitochondrial substrate carrier family protein.
Os05g0516800	15.39	3.82333	14.5267	-2.00909	Down	1.9258	Up	Similar to Ras-related protein RIC2.
Os01g0648600	1.34667	0.253333	0.946667	-2.41028	Down	1.90182	Up	Protein kinase catalytic domain domain containing protein.
Os05g0438500	14.4833	5.44667	15.93	-1.41095	Down	1.5483	Up	Similar to Soluble inorganic pyrophosphatase (EC 3.6.1.1) (Pyrophosphate phospho- hydrolase) (PPase).
Os10g0148400	1.39333	0.06	1.55667	-4.53743	Down	4.69735	Up	Similar to POT family protein.
Os03g0651950	12.3267	1.01333	12.1533	-3.6046	Down	3.58417	Up	Hypothetical protein.
MSTRG.31447	16.9967	4.54667	18.0567	-1.90237	Down	1.98965	Up	PREDICTED: early nodulin-like protein 3 [Oryza sativa Japonica Group]
Os07g0638801	4.44333	0.0833333	1.33	-5.7366	Down	3.99639	Up	Hypothetical protein.
Os03g0168700	1.20667	0.2	0.756667	-2.59296	Down	1.91966	Up	SET domain containing protein.
MSTRG.5975	29.0467	1.96667	29.7633	-3.88455	Down	3.91971	Up	PREDICTED: glycine-rich cell wall structural protein 2-like [Oryza brachyantha]
Os11g0225000	14.5767	2.03	5.00333	-2.84411	Down	1.30141	Up	Serine/threonine protein kinase-related domain containing protein.
Os02g0703600	11.7533	4.12333	22.0833	-1.51119	Down	2.42107	Up	Similar to Abscisic acid 8'-hydroxylase 1.
Os01g0216000	90.71	5.10667	64.8633	-4.15081	Down	3.66695	Up	Lipase GDSL domain containing protein.
Os03g0856300	10.5167	2.06	7.58	-2.35196	Down	1.87955	Up	Similar to Acyl carrier protein III chloroplast precursor (ACP III).
Os01g0922100	5.36	0.983333	3.26333	-2.44648	Down	1.73059	Up	Conserved hypothetical protein.
Os07g0214900	2.35333	0.04	1.45333	-5.87856	Down	5.18322	Up	Similar to Chalcone synthase C2 (EC 2.3.1.74) (Naringenin-chalcone synthase C2).
Os03g0661300	150.387	48.2733	128.723	-1.63938	Down	1.41498	Up	Beta-tubulin Microtubules formation
Os06g0128800	11.31	3.91333	17.78	-1.53113	Down	2.18379	Up	C2 calcium/lipid-binding domain CaLB domain containing protein.
Os09g0441900	0.723333	0.17	0.693333	-2.08913	Down	2.02801	Up	Unknown phosphatidylethanolamine-binding protein (PEBP) like domain protein 426-amino-acid protein homologous to the keratin-associated protein (KAP) 5-4 family Panicle architecture Panicle erectness
Os08g0253800	13.06	2.59667	11.2733	-2.33042	Down	2.11818	Up	Similar to Cellulose synthase-like family C3 protein (Fragment).
Os05g0435800	7.46333	1.23	3.94667	-2.60116	Down	1.68198	Up	Similar to Subtilisin-like protease.
Os03g0609000	0.476667	0.103333	0.496667	-2.20568	Down	2.26497	Up	Peptidase trypsin-like serine and cysteine domain containing protein.
Os06g0163900	1.46333	0.33	1.01333	-2.14872	Down	1.61857	Up	Conserved hypothetical protein.
Os02g0115950	0.73	0.14	0.586667	-2.38247	Down	2.06711	Up	Glutamate dehydrogenase NAD-specific domain containing protein.
Os01g0259400	2.66667	0.856667	2.00667	-1.63823	Down	1.228	Up	Armadillo-type fold domain containing protein.
Os05g0324400	1.27	0.001	1.13333	-10.3106	Down	10.1464	Up	Hypothetical protein.
Os04g0405500	6.23333	1.31667	5.6	-2.24311	Down	2.08854	Up	Conserved hypothetical protein.
Os01g0229000	2.85	1.15333	2.81333	-1.30515	Down	1.28647	Up	Similar to Transcription factor myb.
Os06g0176300	0.446667	0.00333333	0.47	-7.06609	Down	7.13955	Up	2OG-Fe(II) oxygenase domain containing protein.
Os11g0529900	1.08333	0.0233333	0.52	-5.53694	Down	4.47805	Up	Chalcone/stilbene synthase N-terminal domain containing protein.
Os08g0117700	1.74667	0.46	1.56333	-1.9249	Down	1.76492	Up	Serine/threonine protein kinase domain containing protein.
Os09g0328600	2.37667	0.15	1.28	-3.98591	Down	3.09311	Up	Hypothetical conserved gene.
Os03g0758700	0.56	0.0733333	0.496667	-2.93289	Down	2.75974	Up	WD40 repeat domain containing protein.
Os01g0226200	2.33333	0.443333	1.99333	-2.39593	Down	2.16872	Up	Conserved hypothetical protein.
Os11g0118600	3.10667	0.71	1.75	-2.12948	Down	1.30146	Up	Protein of unknown function DUF1191 family protein.
Os03g0205700	11.1133	2.55667	7.7	-2.11996	Down	1.59059	Up	BTB domain containing protein.
Os05g0573900	2.93333	0.673333	2.05	-2.12315	Down	1.60623	Up	Similar to predicted protein.
Os03g0161100	1.99	0.563333	1.59333	-1.82071	Down	1.49999	Up	Similar to Viral A-type inclusion protein repeat containing protein expressed.
Os07g0432333	519.033	32.19	108.667	-4.01114	Down	1.75522	Up	Similar to Thionin-like peptide.
Os04g0495000	0.636667	0.0566667	0.54	-3.48997	Down	3.25239	Up	Similar to OSIGBa0103O01.12 protein.
Os10g0337600	4.54333	1.04667	3.03333	-2.11795	Down	1.5351	Up	Similar to Got1-like family protein expressed.
Os05g0476200	7.19	1.45667	5.46333	-2.30332	Down	1.90711	Up	Similar to DNA replication licensing factor MCM3 homolog (Replication origin activator) (ROA protein) (Fragment).
Os04g0147200	1.17	0.206667	1.56667	-2.50113	Down	2.92232	Up	Protein of unknown function DUF594 domain containing protein.
Os03g0182000	5.05333	0.11	0.75	-5.52166	Down	2.76939	Up	Similar to flavin-dependent monooxygenase 1.
Os04g0469300	3.76	0.986667	3.13667	-1.9301	Down	1.6686	Up	Similar to ATFP4.
Os03g0749401	3.12	1.08333	2.95	-1.52607	Down	1.44524	Up	Hypothetical protein.
Os01g0756200	8.99	1.24	7.77667	-2.85798	Down	2.64881	Up	Similar to VirE2-interacting protein VIP1.
Os01g0151700	0.98	0.236667	1.54	-2.04993	Down	2.702	Up	Similar to Short-chain dehydrogenase Tic32.
Os02g0699700	18.0367	6.01333	12.8167	-1.5847	Down	1.09178	Up	Similar to DNA topoisomerase II.
Os02g0264800	30.5633	4.82333	26.9067	-2.6637	Down	2.47986	Up	Protein of unknown function DUF1070 family protein.
Os05g0119600	1.22333	0.176667	1.15	-2.79172	Down	2.70253	Up	Similar to Protein binding protein.
Os06g0675200	5.76667	1.27	3.86667	-2.18291	Down	1.60626	Up	Conserved hypothetical protein.
Os03g0301950	1.36667	0.363333	2.28667	-1.9113	Down	2.65388	Up	Peroxisomal protein
Os03g0138700	3.46667	0.516667	2.27667	-2.74624	Down	2.13962	Up	TGF-beta receptor type I/II extracellular region family protein.
Os10g0370500	58.54	22.3167	68.7033	-1.3913	Down	1.62226	Up	Glycoside hydrolase catalytic core domain containing protein.
Os09g0518332	0.643333	0.001	0.51	-9.32942	Down	8.99435	Up	Hypothetical protein.
Os06g0589800	7.02667	1.50667	3.26	-2.22148	Down	1.11351	Up	Protein kinase core domain containing protein.
Os11g0657000	2.02333	0.553333	1.3	-1.87051	Down	1.23229	Up	Kelch repeat type 2 domain containing protein.
Os04g0540600	2.02667	0.213333	0.696667	-3.24793	Down	1.70736	Up	Aldehyde dehydrogenase domain containing protein.
Os08g0246300	0.99	0.17	0.53	-2.54189	Down	1.64046	Up	NB-ARC domain containing protein.
Os01g0566800	0.896667	0.0366667	0.403333	-4.61203	Down	3.45943	Up	Hypothetical conserved gene.
Os01g0860900	1.91	0.4	2.59	-2.2555	Down	2.69488	Up	Conserved hypothetical protein.
Os01g0863800	0.453333	0.0366667	0.56	-3.62803	Down	3.93289	Up	Protein of unknown function DUF623 plant domain containing protein.
Os05g0594200	3.79333	0.653333	2.66667	-2.53757	Down	2.02915	Up	Similar to Cation/proton exchanger 1a.
Os03g0738600	247.07	14.5467	302.553	-4.08616	Down	4.37843	Up	Lipoxygenase Seed germination and longevity
Os07g0656900	27.6733	7.41333	15.6033	-1.9003	Down	1.07366	Up	Similar to Serine carboxypepsidase (Fragment).
Os01g0167900	5.76667	2.37333	5.65	-1.28082	Down	1.25134	Up	KIP1-like domain containing protein.
Os10g0418100	1.41667	0.316667	2.22	-2.16146	Down	2.80952	Up	Calcium-transporting ATPase Salinity stress tolerance
Os02g0739700	4.68333	0.67	3.54667	-2.8053	Down	2.40423	Up	E2F Family domain containing protein.
Os03g0144300	18.9833	1.89	6.69667	-3.32828	Down	1.82506	Up	Similar to Xyloglucan galactosyltransferase KATAMARI 1 (EC 2.4.1.-) (MURUS3 protein).
Os02g0742800	5.30333	1.07	3.3	-2.30929	Down	1.62486	Up	Conserved hypothetical protein.
Os01g0217500	3.24667	0.29	1.78	-3.48483	Down	2.61775	Up	ThiJ/PfpI domain containing protein.
Os01g0159200	39.55	15.9067	51.9033	-1.31405	Down	1.7062	Up	Similar to Fasciclin-like protein FLA18.
Os02g0802200	12.9467	4.36667	11.5367	-1.56798	Down	1.40162	Up	Glycoside hydrolase family 79 N-terminal protein.
Os05g0390550	19.36	3.17	10.6	-2.61052	Down	1.74151	Up	Conserved hypothetical protein.
Os04g0309900	10.6433	0.453333	9.18667	-4.55323	Down	4.3409	Up	Similar to H0211A12.5 protein.
Os02g0699466	26.68	7.00667	16.09	-1.92896	Down	1.19936	Up	Conserved hypothetical protein.
Os07g0507200	6.07	1.67	4.49	-1.86185	Down	1.42687	Up	Cell cycle regulated microtubule associated protein domain containing protein.
Os12g0260500	313.347	46.3933	144.527	-2.75577	Down	1.63935	Up	Similar to Oxidoreductase short chain dehydrogenase/reductase family protein expressed.
Os11g0150400	4.75333	0.826667	5.08667	-2.52356	Down	2.62134	Up	Stress responsive alpha-beta barrel domain containing protein.
Os06g0294200	2.08	0.03	0.953333	-6.11548	Down	4.98995	Up	Conserved hypothetical protein.
Os06g0513943	57.8933	6.60667	79.6233	-3.1314	Down	3.5912	Up	Conserved hypothetical protein.
Os04g0656800	15.5967	3.86667	13.3333	-2.01208	Down	1.78588	Up	Similar to Peroxidase precursor (EC 1.11.1.7).
Os12g0616000	2.44	0.57	1.83	-2.09785	Down	1.68281	Up	Similar to Kinesin-like protein KIFC3.
Os01g0744000	11.4567	4.89333	10.6933	-1.2273	Down	1.12782	Up	Similar to Kinesin heavy chain (Fragment).
Os03g0314500	10.2333	0.81	5.32333	-3.65921	Down	2.71634	Up	WD40-like Beta Propeller domain containing protein.
Os10g0177400	5.26	1.48	3.62667	-1.82947	Down	1.29305	Up	TB2/DP1 and HVA22 related protein family protein.
Os02g0653200	157.623	45.4533	98.15	-1.79402	Down	1.1106	Up	Cupredoxin domain containing protein.
Os05g0555100	4.38667	1.31	3.60667	-1.74356	Down	1.4611	Up	Similar to Protein phosphatase 2A B'kappa subunit.
Os02g0731900	7.24	0.143333	1.40667	-5.65854	Down	3.29483	Up	Similar to 3-ketoacyl-CoA synthase.
Os05g0552550	9.9	1.32667	4.25667	-2.89962	Down	1.68192	Up	Hypothetical gene.
Os06g0212300	0.933333	0.0666667	0.61	-3.80735	Down	3.19377	Up	Similar to glycosyltransferase family-37.
Os05g0382900	17.9867	7.61667	16.17	-1.2397	Down	1.08609	Up	Annexin family protein.
Os01g0821300	1.55333	0.05	2.18667	-4.9573	Down	5.45066	Up	Hypothetical conserved gene.
Os09g0560000	4.83	1.20667	2.94667	-2.001	Down	1.28806	Up	Armadillo-like helical domain containing protein.
Os04g0587500	3.7	1.70667	6.41	-1.11634	Down	1.90914	Up	Domain of unknown function DUF250 domain containing protein.
