# Supplementary material for: Local and Systemic Response to Heterogeneous Sulfate Resupply after Sulfur Deficiency in Rice
Source: Int J Mol Sci. 2022 May 31;23(11):6203. doi: 10.3390/ijms23116203 (PMC9181796; doi:10.3390/ijms23116203)
Supplement: Supplementary file 1 [file ijms-23-06203-s001.zip › Table S4.xlsx]

## Sheet: Up-regulated DEGs in shoots
Table S4. DEGs with expression not recovered after sulfate resupply: Up-regulagted DEGs in shoots
Gene ID	CK_Sh_mean	S0_Sh_mean	log2(FC)	P_Value	FDR	Regulation Pattern	Annotation
MSTRG.10136	21.0067	60.4067	1.52386	8.50336e-09	2.92287e-07	Up	PREDICTED: benzyl alcohol O-benzoyltransferase-like [Oryza sativa Japonica Group]
MSTRG.11862	0.316667	1.34667	2.08836	0.00131086	0.00950507	Up	--
MSTRG.12129	0.426667	1.17667	1.46352	1.04134e-07	2.81589e-06	Up	--
MSTRG.13107	0.001	0.83	9.69697	2.05741e-06	3.92988e-05	Up	PREDICTED: stemar-13-ene synthase-like [Oryza sativa Japonica Group]
MSTRG.1338	0.19	0.976667	2.36187	0.00230346	0.015144	Up	--
MSTRG.19390	0.26	2.21	3.08746	0.000112303	0.00121894	Up	--
MSTRG.19520	0.38	2.42	2.67094	7.68699e-05	0.000882116	Up	--
MSTRG.19903	0.386667	1.2	1.63387	0.00346877	0.0210726	Up	--
MSTRG.21576	0.001	0.523333	9.03159	4.29004e-05	0.000534929	Up	PREDICTED: CSC1-like protein At1g32090 [Oryza sativa Japonica Group]
MSTRG.2270	0.0366667	0.74	4.33498	0.000120926	0.00130307	Up	Oligopeptide transporter 7 [Morus notabilis]
MSTRG.23148	0.04	0.406667	3.34577	0.00395979	0.023502	Up	--
MSTRG.26250	0.0466667	0.16	1.77761	0.00294206	0.0184554	Up	integrase core domain containing protein [Oryza sativa Japonica Group]
MSTRG.26379	0.4	1.09333	1.45066	0.00590313	0.0323471	Up	--
MSTRG.27000	0.123333	0.81	2.71536	0.00382325	0.0228425	Up	--
MSTRG.28097	0.726667	1.82333	1.32721	9.54912e-08	2.60834e-06	Up	--
MSTRG.28194	0.676667	3.38667	2.32335	1.44152e-08	4.73548e-07	Up	PREDICTED: transcription factor JUNGBRUNNEN 1-like [Oryza sativa Japonica Group]
MSTRG.31092	0.36	0.953333	1.40498	0.00777075	0.0401378	Up	--
MSTRG.31753	0.413333	1.91333	2.21071	5.0935e-05	0.000619744	Up	--
MSTRG.32349	0.0366667	0.31	3.07973	0.00280475	0.0177399	Up	PREDICTED: UDP-glycosyltransferase 89B2-like [Oryza sativa Japonica Group]
MSTRG.32560	1.09	2.97667	1.44937	0.00835168	0.0424583	Up	--
MSTRG.33160	0.0733333	0.24	1.71049	0.000823304	0.00642866	Up	--
MSTRG.33177	0.00666667	0.28	5.39232	4.69994e-05	0.000577783	Up	--
MSTRG.33179	0.001	0.28	8.12928	0.00337484	0.0206373	Up	--
MSTRG.33466	0.23	0.706667	1.6194	0.000322156	0.00296784	Up	PREDICTED: calponin homology domain-containing protein DDB_G0272472 [Oryza sativa Japonica Group]
MSTRG.33536	0.73	2.91667	1.99835	7.31097e-07	1.58417e-05	Up	PREDICTED: annexin D2-like [Oryza sativa Japonica Group]
MSTRG.4893	0.0133333	0.356667	4.74147	0.00231055	0.0151805	Up	--
MSTRG.5110	0.69	1.67333	1.27806	6.11579e-05	0.000722496	Up	--
MSTRG.5906	8.55333	23.8867	1.48165	2.5972e-05	0.00034783	Up	PREDICTED: cylicin-2 [Oryza sativa Japonica Group]
MSTRG.6014	1.39	2.80667	1.01377	0.00182061	0.0125102	Up	--
MSTRG.6443	0.943333	3.81	2.01395	9.04537e-10	3.83865e-08	Up	PREDICTED: probable glutathione S-transferase GSTU6 [Oryza sativa Japonica Group]
MSTRG.7050	1.07333	4.08667	1.92883	4.49583e-05	0.000556613	Up	GDA1/CD39 family protein [Oryza sativa Japonica Group]
MSTRG.7551	1.14	2.74	1.26514	1.22158e-05	0.00018172	Up	PREDICTED: NADPH--cytochrome P450 reductase-like [Oryza brachyantha]
MSTRG.7914	0.4	1.03	1.36457	0.00460675	0.0265814	Up	--
MSTRG.8088	0.976667	2.77	1.50395	1.60064e-10	7.87419e-09	Up	--
MSTRG.8612	0.72	1.76	1.28951	5.21645e-05	0.00063165	Up	--
MSTRG.8911	0.353333	1.69333	2.26076	5.23407e-05	0.000632953	Up	--
MSTRG.8921	0.79	1.75	1.14743	3.57691e-06	6.31324e-05	Up	receptor kinase TRKa [Oryza sativa Indica Group]
MSTRG.9124	1.71667	3.88	1.17645	0.00781664	0.0403117	Up	PREDICTED: WRKY transcription factor SUSIBA2-like isoform X3 [Oryza sativa Japonica Group]
MSTRG.9803	0.716667	1.53	1.09416	0.00122877	0.0090023	Up	PREDICTED: cysteine-rich receptor-like protein kinase 10 [Oryza sativa Japonica Group]
Os01g0100700	96.9067	195.23	1.01051	1.09664e-10	5.55134e-09	Up	Similar to 40S ribosomal protein S5-1.
Os01g0116901	0.283333	0.72	1.3455	0.00821961	0.0419234	Up	Hypothetical protein.
Os01g0124000	6.1	45.58	2.90152	4.25112e-30	1.6814e-27	Up	Similar to Bowman Birk trypsin inhibitor.
Os01g0128000	1.00667	2.44667	1.28123	2.74975e-06	5.05379e-05	Up	Myb transcription factor domain containing protein.
Os01g0138400	1.73333	3.68333	1.08746	0.00664271	0.0355557	Up	Serine/threonine protein kinase domain containing protein.
Os01g0152000	1	2.49	1.31615	1.83271e-05	0.00025876	Up	Protein kinase core domain containing protein.
Os01g0153600	0.001	0.796667	9.63783	3.70089e-07	8.75465e-06	Up	Protein of unknown function DUF674 domain containing protein.
Os01g0155800	6.09667	39.07	2.67997	3.80786e-20	6.31042e-18	Up	Conserved hypothetical protein.
Os01g0157800	1.91667	5.09667	1.41095	0.000248186	0.00238645	Up	Heat shock protein DnaJ N-terminal domain containing protein.
Os01g0160100	4.30667	9.02667	1.06762	2.45e-12	1.61504e-10	Up	Similar to Pyruvate decarboxylase isozyme 2 (EC 4.1.1.1) (PDC) (Fragment).
Os01g0160800	3.21333	12.17	1.92119	1.84315e-10	8.99263e-09	Up	Similar to Protein synthesis inhibitor II (EC 3.2.2.22) (Ribosome-inactivating protein II) (rRNA N-glycosidase).
Os01g0161200	0.523333	1.05667	1.01372	0.00272465	0.0173368	Up	Hypothetical protein.
Os01g0170600	10.43	24.6767	1.24241	3.06613e-26	9.00532e-24	Up	Hypothetical conserved gene.
Os01g0175400	0.193333	0.626667	1.69661	0.00663242	0.0355198	Up	Ankyrin repeat containing protein.
Os01g0196300	0.193333	0.9	2.21883	0.000398768	0.00353317	Up	Basic helix-loop-helix (bHLH) transcription factor Diterpenoid phytoalexin factor Biosynthesis of diterpenoid phytoalexins Stress response
Os01g0237500	2.4	9.67667	2.01148	6.23051e-05	0.000734003	Up	NmrA-like family protein.
Os01g0237750	3.24	13.4633	2.05497	0.000615019	0.00506073	Up	Hypothetical conserved gene.
Os01g0246700	6.48	15.2233	1.23222	5.70064e-09	2.03739e-07	Up	Similar to WRKY transcription factor 1.
Os01g0248701	3.63667	13.7067	1.91419	1.17237e-27	3.78012e-25	Up	Terpenoid synthase domain containing protein.
Os01g0253800	0.453333	3.35333	2.88695	3.00227e-05	0.000394242	Up	Conserved hypothetical protein.
Os01g0257300	0.39	1.37333	1.81614	0.00484437	0.0276246	Up	Similar to FPF1.
Os01g0261200	27.8333	56.6667	1.02569	2.66241e-14	2.30929e-12	Up	No apical meristem (NAM) protein domain containing protein.
Os01g0263000	0.0833333	0.653333	2.97085	0.000812439	0.00636391	Up	Similar to Peroxidase.
Os01g0268600	1.20667	6.05	2.32591	0.0029324	0.018406	Up	Glycoside hydrolase family 31 protein.
Os01g0297200	2.81333	6.33667	1.17144	9.47517e-05	0.00105291	Up	ATPase AAA-type core domain containing protein.
Os01g0298400	0.0966667	0.636667	2.71945	0.00480754	0.027441	Up	Myb transcription factor domain containing protein.
Os01g0307624	0.06	0.436667	2.8635	0.00063627	0.00519667	Up	Conserved hypothetical protein.
Os01g0337500	0.943333	2.76	1.54883	1.96781e-05	0.000274182	Up	Similar to H+-pyrophosphatase (Fragment).
Os01g0342750	0.523333	1.26667	1.27523	1.3684e-05	0.000200554	Up	Hypothetical conserved gene.
Os01g0362533	3.71667	7.54333	1.02119	3.58541e-05	0.000457649	Up	Conserved hypothetical protein.
Os01g0363900	10.7533	26.0467	1.27631	2.12775e-18	2.80522e-16	Up	Similar to HASTY.
Os01g0369200	0.573333	1.48667	1.37464	1.18131e-05	0.000177071	Up	Component of cullin-RING E3 ubiquitin ligase (CRL) complex Salt/drought stress response Cold stress response
Os01g0370200	0.913333	2.13	1.22164	0.0092724	0.0462513	Up	Similar to Glutathione-S-transferase 19E50.
Os01g0374600	1.90667	4.51	1.24207	0.00360577	0.0217478	Up	Similar to Laccase-21.
Os01g0389700	1.18	4.43667	1.91069	7.57924e-06	0.000119974	Up	Protein of unknown function DUF679 family protein.
Os01g0498300	0.856667	1.72333	1.0084	0.00274183	0.0174237	Up	Glycosyltransferase AER61 uncharacterized domain containing protein.
Os01g0548600	1.09	2.52667	1.21291	0.00536526	0.0299671	Up	Protein kinase catalytic domain domain containing protein.
Os01g0550800	1.12333	2.64333	1.23457	0.00909024	0.0454664	Up	Protein of unknown function DUF239 plant domain containing protein.
Os01g0558100	2.50667	5.75	1.19779	2.24484e-05	0.00030673	Up	Similar to Glutathione S-transferase TSI-1 (EC 2.5.1.18) (Glutathione S- transferase 1).
Os01g0561600	0.473333	2.02	2.09343	0.000394183	0.00349777	Up	Cytochrome P450 family protein.
Os01g0566500	1.73333	6.25	1.85031	1.28397e-10	6.42288e-09	Up	Similar to Dioxygenase RAMOSUS1.
Os01g0581800	0.36	1.33667	1.89257	2.18959e-07	5.49044e-06	Up	Hypothetical conserved gene.
Os01g0583300	1.5	3.11	1.05195	0.000555185	0.00464701	Up	Zinc finger C2H2 LYAR-type domain containing protein.
Os01g0584900	3.34	8.06	1.27093	0.000296096	0.00276381	Up	WRKY transcription factor 28-like (WRKY5) (WRKY transcription factor 77).
Os01g0605000	2.19	4.44	1.01963	0.000721188	0.00576329	Up	Hypothetical protein.
Os01g0605100	4.64333	9.35333	1.01032	1.49814e-06	2.95878e-05	Up	Similar to BCS1 protein-like protein.
Os01g0606900	0.13	0.973333	2.90442	5.17525e-05	0.000628144	Up	Heat shock protein DnaJ N-terminal domain containing protein.
Os01g0608900	0.336667	1.02333	1.60388	0.000138341	0.00145678	Up	Hypothetical gene.
Os01g0609200	0.233333	0.91	1.96347	3.13731e-05	0.000408424	Up	Similar to Pleiotropic drug resistance protein 3.
Os01g0609501	2.33667	13.17	2.49473	6.64057e-08	1.88143e-06	Up	Hypothetical protein.
Os01g0609900	4.41	10.5533	1.25885	1.94931e-11	1.12099e-09	Up	Similar to Pleiotropic drug resistance protein 4.
Os01g0612500	2.86333	5.75	1.00587	0.00129775	0.00943078	Up	Phospholipase/carboxylesterase domain containing protein.
Os01g0615100	12.0067	39.87	1.73147	1.20245e-09	4.99573e-08	Up	Chymotrypsin protease inhibitor Salt and osmotic stress tolerance
Os01g0626400	2.13	4.5	1.07907	3.6813e-06	6.46932e-05	Up	WRKY transcription factor Control of flowering time and plant height
Os01g0627600	0.216667	0.86	1.98886	0.00351415	0.0212916	Up	Similar to Cytochrome P450 monooxygenase.
Os01g0627701	0.143333	0.546667	1.93129	0.00493699	0.0280442	Up	Hypothetical protein.
Os01g0627900	0.753333	1.93667	1.36222	0.000525016	0.00443454	Up	Similar to Cytochrome P450.
Os01g0628900	1.91	5.64333	1.56297	3.88274e-07	9.13382e-06	Up	Cytochrome P450 family protein.
Os01g0648000	8.33333	20.07	1.26808	3.31161e-24	8.25509e-22	Up	Potassium channel Potassium uptake Salt stress tolerance
Os01g0670100	0.256667	1.48667	2.53411	1.86424e-09	7.38327e-08	Up	Serine/threonine protein kinase-related domain containing protein.
Os01g0674400	7.53667	15.7667	1.06488	7.15334e-05	0.000827278	Up	Hypothetical conserved gene.
Os01g0692100	4.29667	19.1267	2.1543	2.40481e-21	4.48657e-19	Up	Glutathione S-transferase C-terminal-like domain containing protein.
Os01g0693300	2.40667	5.71667	1.24814	8.52502e-09	2.92692e-07	Up	Similar to Lipid phosphate phosphatase 2 (EC 3.1.3.-) (AtLPP2) (Phosphatidic acid phosphatase 2) (AtPAP2) (Prenyl diphosphate phosphatase).
Os01g0698800	0.001	0.36	8.49185	0.000402141	0.00355728	Up	Conserved hypothetical protein.
Os01g0699400	0.623333	1.47333	1.24101	0.00215634	0.0143711	Up	Serine/threonine protein kinase domain containing protein.
Os01g0699500	2.26	5.01667	1.15041	0.00125611	0.00918073	Up	Serine/threonine protein kinase domain containing protein.
Os01g0699600	0.3	2.77667	3.21032	9.08574e-07	1.91013e-05	Up	Serine/threonine protein kinase domain containing protein.
Os01g0714600	5.36333	13.4933	1.33104	0.000824989	0.00643843	Up	Similar to cDNA clone:J023088C01 full insert sequence.
Os01g0719200	1.24	2.96	1.25526	0.00849836	0.0430785	Up	Conserved hypothetical protein.
Os01g0723025	0.001	0.226667	7.82443	4.31751e-06	7.38117e-05	Up	Hypothetical protein.
Os01g0724700	0.536667	1.79333	1.74055	0.00643431	0.0346716	Up	Similar to lachrymatory-factor synthase.
Os01g0730100	0.4	0.996667	1.31711	0.00468652	0.026916	Up	Cyclin-like F-box domain containing protein.
Os01g0731600	0.1	0.823333	3.04148	0.000515859	0.00436713	Up	Similar to pathogen-related protein.
Os01g0731700	0.001	0.373333	8.54432	0.000448981	0.00387731	Up	Hypothetical protein.
Os01g0740700	1.00667	2.25	1.16034	9.32686e-06	0.00014395	Up	Hypothetical protein.
Os01g0743500	0.143333	0.716667	2.32193	3.11978e-05	0.000407263	Up	Cytosolic NADP malic enzyme.
Os01g0761500	0.346667	0.806667	1.21842	0.00977243	0.0482104	Up	TGF-beta receptor type I/II extracellular region family protein.
Os01g0764800	3.63667	9.25333	1.34736	9.21348e-09	3.13787e-07	Up	Indole-3-acetic acid (IAA)-amido synthetase Disease resistance Abiotic stress tolerance
Os01g0768333	1.26	4.49333	1.83436	0.0016825	0.011706	Up	Auxin responsive SAUR protein family protein.
Os01g0776500	1.54667	4.26667	1.46395	1.44756e-11	8.50304e-10	Up	Peptidase cysteine/serine trypsin-like domain containing protein.
Os01g0787000	1.91333	4.11333	1.10422	2.35331e-08	7.38716e-07	Up	Similar to Peroxidase (EC 1.11.1.7).
Os01g0793800	1.3	3.41	1.39126	0.00664796	0.0355773	Up	Conserved hypothetical protein.
Os01g0793900	7.26	15.0767	1.05428	0.000698315	0.00560466	Up	Conserved hypothetical protein.
Os01g0794800	2.21	5.06	1.19509	1.76525e-05	0.000251261	Up	Similar to Subtilase.
Os01g0795200	4.81667	15.0867	1.64717	1.8629e-08	5.98062e-07	Up	Similar to Subtilase.
Os01g0795250	0.973333	2.81	1.52956	2.58758e-06	4.79138e-05	Up	Hypothetical protein.
Os01g0812800	6.62	19.1433	1.53194	1.42339e-08	4.68629e-07	Up	Ribosomal protein L30e domain containing protein.
Os01g0816100	7.07333	20.9	1.56304	7.48565e-13	5.32504e-11	Up	Similar to NAC domain protein.
Os01g0818600	10.8133	21.7867	1.01063	1.28058e-06	2.57541e-05	Up	Similar to Leucine-rich repeat transmembrane protein kinase.
Os01g0826000	5.78333	12.4267	1.10347	3.2615e-05	0.000421014	Up	Heavy metal transport/detoxification protein domain containing protein.
Os01g0830700	14.31	34.7267	1.27902	9.85526e-21	1.76112e-18	Up	Protein of unknown function DUF231 plant domain containing protein.
Os01g0831250	0.556667	1.49333	1.42365	0.000234423	0.00227401	Up	Hypothetical gene.
Os01g0838300	1.82667	4.24	1.21485	0.00909424	0.0454697	Up	Hypothetical protein.
Os01g0848900	2.76	6.20667	1.16915	2.10793e-06	4.01087e-05	Up	Conserved hypothetical protein.
Os01g0850800	0.123333	0.563333	2.19143	0.000126251	0.00135252	Up	Laccase-8.
Os01g0851700	26.97	65.9767	1.2906	1.41601e-37	9.13139e-35	Up	Similar to Cytosolic starch phosphorylase (Fragment).
Os01g0855200	11.02	65.6567	2.57482	4.80681e-65	7.92162e-62	Up	Tetratricopeptide-like helical domain containing protein.
Os01g0859100	0.563333	1.52333	1.43517	7.99433e-05	0.000912793	Up	Similar to WIP1 protein (Fragment).
Os01g0865400	2.10667	5.09667	1.27459	1.66252e-07	4.28843e-06	Up	UDP-glucuronosyl/UDP-glucosyltransferase family protein.
Os01g0881900	23.2833	48.89	1.07024	6.73756e-24	1.6118e-21	Up	Leucine-rich repeat cysteine-containing containing protein.
Os01g0885700	0.203333	0.563333	1.47014	0.00831282	0.042297	Up	Protein kinase-like domain containing protein.
Os01g0890250	0.001	0.173333	7.43741	0.000242884	0.00234535	Up	Hypothetical protein.
Os01g0891400	0.886667	2.07333	1.22549	0.000560754	0.00468702	Up	S1 RNA binding domain containing protein.
Os01g0891700	0.913333	2.58667	1.50188	5.74668e-06	9.44849e-05	Up	Leucine-rich repeat N-terminal domain containing protein.
Os01g0899200	8.58333	17.41	1.02031	1.52291e-09	6.20542e-08	Up	Similar to dehydration-responsive family protein.
Os01g0910800	0.43	12.0667	4.81055	3.92627e-29	1.43789e-26	Up	Conserved hypothetical protein.
Os01g0916000	1.08	2.29	1.08432	0.00109231	0.00817621	Up	Conserved hypothetical protein.
Os01g0920450	2.68	8.32333	1.63493	1.31408e-05	0.000193777	Up	Conserved hypothetical protein.
Os01g0920500	2.67667	7.88667	1.55898	5.97742e-10	2.62299e-08	Up	Nucleotide-diphospho-sugar transferase domain containing protein.
Os01g0920700	0.876667	2.53333	1.53094	2.88858e-07	7.0757e-06	Up	Nucleotide-diphospho-sugar transferase domain containing protein.
Os01g0930400	1.92333	3.99	1.05278	0.000229606	0.0022302	Up	Potassium transporter High-affinity K acquisition Root-to-shoot K transport K-regulated salt tolerance
Os01g0933200	31.32	63.1467	1.01162	2.95712e-15	2.86666e-13	Up	Heavy metal transport/detoxification protein domain containing protein.
Os01g0934800	0.876667	3.05333	1.80028	6.8139e-05	0.000791726	Up	Alpha/beta hydrolase fold-1 domain containing protein.
Os01g0939500	4.23333	10.8467	1.35739	7.09505e-07	1.54189e-05	Up	Similar to Eukaryotic peptide chain release factor subunit 1-2 (eRF1-2) (Eukaryotic release factor 1-2) (Omnipotent suppressor protein 1 homolog 2) (SUP1 homolog 2).
Os01g0940700	48.8233	141.16	1.53169	1.31542e-09	5.41953e-08	Up	Similar to Glucan endo-1 3-beta-glucosidase GII precursor (EC 3.2.1.39) ((1->3)- beta-glucan endohydrolase GII) ((1->3)-beta-glucanase isoenzyme GII) (Beta-1 3-endoglucanase GII).
Os01g0940800	9.14	36.64	2.00315	3.15374e-10	1.47559e-08	Up	Similar to Beta-1 3-glucanase precursor.
Os01g0945100	1.46	3.43	1.23224	0.00987415	0.0485666	Up	Similar to amino acid transporter.
Os01g0945200	1.71667	3.66	1.09223	0.00213927	0.0142833	Up	Similar to BAT1 (BIDIRECTIONAL AMINO ACID TRANSPORTER 1)%3B amino acid transmembrane transporter.
Os01g0950200	0.66	2.17	1.71716	8.13811e-05	0.00092707	Up	Hypothetical protein.
Os01g0955100	4.22667	13.41	1.66572	0.00162037	0.0113552	Up	Similar to Calmodulin-like protein (Fragment).
Os01g0959750	13.5633	59.9567	2.14421	2.82597e-41	2.14948e-38	Up	Conserved hypothetical protein.
Os01g0963000	5.09667	31.7167	2.63762	1.02426e-23	2.39242e-21	Up	Similar to Peroxidase BP 1 precursor.
Os02g0114800	0.001	0.586667	9.1964	0.00815613	0.0416497	Up	Conserved hypothetical protein.
Os02g0121700	2.92333	17.4733	2.57947	5.34987e-20	8.7197e-18	Up	Terpenoid synthase domain containing protein.
Os02g0131800	0.37	1.54333	2.06045	0.000217427	0.00213192	Up	Trivalent AI influx transporter Aluminum (Al) tolerance
Os02g0152400	24.15	49.7267	1.042	1.52797e-09	6.21631e-08	Up	Rubisco small subunit 1 Reguration of Rubisco catalytic activity
Os02g0154000	0.3	0.623333	1.05504	0.00395406	0.0234774	Up	Leucine-rich repeat receptor-like kinase Positive regulation of the drought stress response and tiller development
Os02g0161100	0.626667	1.34333	1.10005	8.95727e-06	0.000138953	Up	Actin-binding FH2 domain containing protein.
Os02g0175700	0.22	0.65	1.56294	0.00252563	0.0163261	Up	Epsin-like N-terminal domain containing protein.
Os02g0193300	0.236667	1.09	2.2034	0.00510325	0.02878	Up	Conserved hypothetical protein.
Os02g0205500	2.96333	11.29	1.92975	1.45837e-24	3.82841e-22	Up	Similar to Fatty acid elongase 1.
Os02g0209300	2.11	5.55333	1.39611	0.000418821	0.00367136	Up	Hypothetical conserved gene.
Os02g0212300	2.73333	5.6	1.03477	0.00132911	0.00961629	Up	Conserved hypothetical protein.
Os02g0212500	2.53	5.43	1.10181	0.000165422	0.0016918	Up	Conserved hypothetical protein.
Os02g0237100	1.09333	2.33333	1.09366	0.00169828	0.011798	Up	Similar to Spermine synthase.
Os02g0241100	4.14333	8.76	1.08014	3.34062e-15	3.22789e-13	Up	Protein kinase core domain containing protein.
Os02g0242900	0.46	1.55667	1.75875	2.40044e-05	0.000325144	Up	Similar to hydroquinone glucosyltransferase.
Os02g0256200	1.84667	3.9	1.07855	0.000643571	0.00524475	Up	Similar to Histidine-rich protein.
Os02g0266900	0.406667	0.93	1.19338	0.00395081	0.0234675	Up	Conserved hypothetical protein.
Os02g0269400	0.343333	1.12667	1.71438	0.000136918	0.00144436	Up	Hypothetical protein.
Os02g0269600	3.23333	13.1467	2.0236	2.38729e-08	7.4859e-07	Up	Similar to Subtilase.
Os02g0270200	0.266667	0.983333	1.88264	3.41071e-07	8.14615e-06	Up	Similar to Subtilase.
Os02g0282000	1.74667	3.59333	1.04072	1.39095e-12	9.55117e-11	Up	NB-ARC domain containing protein.
Os02g0282900	2.72333	10.6633	1.96921	5.24425e-36	3.0503e-33	Up	Similar to 68 kDa protein HP68.
Os02g0290900	0.223333	0.726667	1.7021	0.00529295	0.0296469	Up	Similar to GDSL-motif lipase/hydrolase family protein.
Os02g0314600	3.02667	6.41667	1.08409	0.00131321	0.00951982	Up	Peptidase A1 domain containing protein.
Os02g0327500	1.78333	4.34333	1.28423	2.77648e-07	6.84066e-06	Up	Protein of unknown function DUF266 plant family protein.
Os02g0504000	17.99	50.2333	1.48145	1.16137e-21	2.20838e-19	Up	Similar to Cytochrome P450 CYP81L6.
Os02g0504700	0.986667	2.94	1.57518	0.00252094	0.0162993	Up	Conserved hypothetical protein.
Os02g0512000	0.77	2.12667	1.46566	0.00020474	0.00202717	Up	Auxin responsive SAUR protein family protein.
Os02g0519950	0.46	0.983333	1.09605	0.00157383	0.0110683	Up	Hypothetical protein.
Os02g0526400	19.6867	47.4867	1.2703	2.92498e-13	2.2305e-11	Up	Similar to ATP-dependent Clp protease ATP-binding subunit.
Os02g0540700	1.98667	4.18667	1.07545	0.00348997	0.0211581	Up	Similar to Arm repeat-containing protein.
Os02g0559800	0.486667	2.52333	2.37432	1.03766e-05	0.00015824	Up	RING-H2 type E3 ubiquitin ligase Root development Maintenance of cell viability after the initiation of root primordial formation Defense response
Os02g0560200	0.19	0.896667	2.23857	0.00104364	0.00786947	Up	RING-H2 type E3 ubiquitin ligase Root development Maintenance of cell viability after the initiation of root primordial formation Defense response
Os02g0560600	0.176667	0.836667	2.24362	0.00107306	0.0080545	Up	RING-H2 type E3 ubiquitin ligase Root development Maintenance of cell viability after the initiation of root primordial formation Defense response
Os02g0561800	0.81	3.99333	2.3016	2.99297e-06	5.43018e-05	Up	RING-H2 type E3 ubiquitin ligase Root development Maintenance of cell viability after the initiation of root primordial formation Defense response
Os02g0562600	0.963333	1.94333	1.01243	0.00190081	0.0129592	Up	Similar to Seven trans-membrane protein (Fragment).
Os02g0564700	1.21333	2.76333	1.18743	2.11193e-05	0.000290981	Up	Similar to BHLH transcription factor.
Os02g0568700	0.0333333	0.45	3.75489	0.00383106	0.0228845	Up	Terpene synthase-like domain containing protein.
Os02g0569000	0.81	2.65	1.71	7.67204e-06	0.000120926	Up	Cytochrome P450 family protein.
Os02g0569400	0.983333	10.74	3.44917	7.8453e-18	9.9031e-16	Up	Cytochrome P450 family protein.
Os02g0569900	2.59333	6.62667	1.35348	0.000124862	0.00133956	Up	Cytochrome P450 family protein.
Os02g0570400	2.33	13.1	2.49116	6.47534e-23	1.41239e-20	Up	Similar to Ent-kaurene synthase 1A.
Os02g0570700	4.39333	19.1567	2.12446	6.48516e-12	4.08441e-10	Up	Cytochrome P450 family protein.
Os02g0571900	5.68667	23.0767	2.02078	1.65855e-10	8.11871e-09	Up	Cytochrome P450 family protein.
Os02g0575700	15.5467	35.8433	1.2051	7.04495e-13	5.0357e-11	Up	Similar to OSIGBa0097P08.1 protein.
Os02g0580966	0.206667	0.796667	1.94667	0.000297221	0.00277344	Up	Hypothetical protein.
Os02g0582800	2.42333	5.62	1.21358	7.27633e-06	0.000115611	Up	Conserved hypothetical protein.
Os02g0584200	2.22333	5.48333	1.30233	0.00264453	0.016925	Up	Conserved hypothetical protein.
Os02g0585100	1.57	5.4	1.78219	0.00062624	0.00513454	Up	Similar to ATFP4.
Os02g0595900	1.5	4.08333	1.44478	0.00544185	0.0302979	Up	Partner protein of NRT2 Activator for NRT2 High-affinity nitrate transport
Os02g0598200	0.573333	1.18333	1.04541	0.000979422	0.00745154	Up	Hypothetical conserved gene.
Os02g0603100	0.001	2.65333	11.3736	0.00857887	0.043405	Up	Similar to fasciated ear2.
Os02g0612200	1.94	4.12667	1.08892	9.6197e-05	0.00106636	Up	NB-ARC domain containing protein.
Os02g0615800	2.62667	6.76667	1.36521	6.66183e-05	0.000776369	Up	Protein kinase core domain containing protein.
Os02g0623600	0.156667	0.42	1.42269	0.00871554	0.0439316	Up	Similar to OSIGBa0145M07.8 protein.
Os02g0626532	0.78	3.40333	2.1254	9.36037e-10	3.961e-08	Up	Hypothetical gene.
Os02g0632800	2.09	4.74667	1.18341	6.6339e-08	1.88143e-06	Up	Wall-associated kinase Positive regulation of rice blast resistance
Os02g0650900	0.5	2.51	2.32769	0.000117582	0.00127066	Up	Similar to Glutamate dehydrogenase 2 (EC 1.4.1.3) (GDH 2).
Os02g0655100	2.18667	4.43667	1.02074	0.00140423	0.0100681	Up	Uncharacterised protein family UPF0565 domain containing protein.
Os02g0682300	3.26667	7.46667	1.19265	0.00178917	0.0123371	Up	RING-type E3 ligase Negative regulation of cuticular wax biosynthesis Drought stress response
Os02g0709000	0.53	1.32667	1.32374	0.00240984	0.0157111	Up	Exonuclease domain containing protein.
Os02g0710500	3.27333	7.84333	1.26071	1.05491e-09	4.43243e-08	Up	Similar to Receptor protein kinase.
Os02g0720500	3.74333	7.91667	1.08057	3.85746e-06	6.71254e-05	Up	Peptidase A1 domain containing protein.
Os02g0733500	0.93	2.14333	1.20455	0.00224458	0.0148198	Up	EF-Hand type domain containing protein.
Os02g0733900	0.83	2.60333	1.64918	0.00645875	0.0347907	Up	Conserved hypothetical protein.
Os02g0738200	0.936667	2.10333	1.16707	0.00188908	0.012897	Up	Zinc finger RING/FYVE/PHD-type domain containing protein.
Os02g0740400	1.96	4.13	1.07529	0.00288597	0.0181838	Up	Similar to GSDL-motif lipase.
Os02g0740700	6.15	14.06	1.19294	0.000213931	0.00210413	Up	Matrix metalloproteinase Plant development Symplastic apoplastic transport
Os02g0749700	0.02	1.31333	6.03709	0.000549424	0.0046105	Up	Laccase Lignin biosynthesis Response to Cu stress of rice roots
Os02g0770500	0.326667	1	1.61411	0.000211444	0.00208243	Up	Similar to WRKY transcription factor 32.
Os02g0771400	2.21333	5.13	1.21274	3.12982e-05	0.000407922	Up	Protein-tyrosine phosphatase SIW14-like domain containing protein.
Os02g0773732	0.0833333	0.356667	2.09761	0.00765155	0.0396187	Up	Hypothetical conserved gene.
Os02g0782900	2.35	4.78	1.02435	0.00132534	0.00959131	Up	Conserved hypothetical protein.
Os02g0803300	3.89667	7.89333	1.01839	1.049e-11	6.31185e-10	Up	Epsin-like N-terminal domain containing protein.
Os02g0807000	10.9067	26.8833	1.3015	4.08637e-06	7.03218e-05	Up	Similar to Phosphoenolpyruvate carboxylase kinase 1.
Os02g0812700	0.116667	0.473333	2.02046	0.00990422	0.0486906	Up	Hypothetical conserved gene.
Os02g0818900	0.853333	2.41667	1.50184	0.00290554	0.01828	Up	Heavy metal transport/detoxification protein domain containing protein.
Os02g0824100	0.001	0.27	8.07682	2.92513e-05	0.000384965	Up	Cytochrome P450 family protein.
Os03g0103100	10.7067	39.5333	1.88456	0.00716873	0.0377513	Up	Similar to Physical impedance induced protein.
Os03g0107800	54.24	115	1.0842	1.11293e-18	1.51441e-16	Up	Similar to Starch excess 4.
Os03g0111400	9.77667	21.5967	1.14339	1.00529e-06	2.08392e-05	Up	Heavy metal transport/detoxification protein domain containing protein.
Os03g0126000	25.46	64.97	1.35154	6.78808e-17	7.80472e-15	Up	Similar to Phosphorybosyl anthranilate transferase 1.
Os03g0142500	0.39	1.24667	1.67653	0.000433396	0.00377016	Up	Zinc finger RING/FYVE/PHD-type domain containing protein.
Os03g0168000	0.286667	0.913333	1.67177	0.000777278	0.00614858	Up	Major facilitator superfamily general substrate transporter domain containing protein.
Os03g0177400	584.23	1212.37	1.05323	4.79609e-19	6.94007e-17	Up	EF-1 alpha.
Os03g0180800	0.646667	3.32	2.36009	1.2643e-06	2.54612e-05	Up	TIFY domain-containing transcriptional regulator Salt and dehydration stress tolerance
Os03g0180900	9.77667	41.5133	2.08616	1.66068e-21	3.11787e-19	Up	Tify domain containing protein.
Os03g0181100	5.96333	14.29	1.26082	2.7515e-08	8.45809e-07	Up	Tify domain containing protein.
Os03g0183000	10.2767	22.2033	1.1114	4.02591e-09	1.48169e-07	Up	APETALA2/ethylene-responsive element binding protein 125 Transcription regulator Positive regulator of grain length
Os03g0194900	33.48	68.8233	1.0396	4.55913e-12	2.90843e-10	Up	Uncharacterised conserved protein UCP037471 domain containing protein.
Os03g0195100	3.75667	8.71667	1.21432	1.92189e-05	0.000269046	Up	Putative aminotransferase Disease resistance response against infection with rice blast fungus
Os03g0200200	3.97	8.73333	1.13739	1.12358e-05	0.000169445	Up	Conserved hypothetical protein.
Os03g0201700	5.17333	10.4567	1.01526	1.33377e-08	4.401e-07	Up	Histone acetylation protein 2 domain containing protein.
Os03g0231650	0.273333	1.06333	1.95986	0.000217353	0.00213192	Up	Hypothetical protein.
Os03g0233900	2.27667	13.91	2.61113	6.87276e-11	3.57047e-09	Up	Non-symbiotic hemoglobin 1 (rHb1) (ORYsa GLB1a).
Os03g0236200	1.31	10.34	2.9806	2.36735e-22	4.84311e-20	Up	Similar to Glutamate decarboxylase isozyme 3 (EC 4.1.1.15).
Os03g0241200	82.32	165.757	1.00975	3.65703e-10	1.70035e-08	Up	Similar to NHP2-like protein 1 (High mobility group-like nuclear protein 2 homolog 1) ([U4/U6.U5] tri-snRNP 15.5 kDa protein) (OTK27).
Os03g0259100	13.7567	37.2133	1.43569	3.68492e-06	6.47184e-05	Up	Similar to Basic blue protein (Cusacyanin) (Plantacyanin) (CBP).
Os03g0264400	22.1633	52.3567	1.2402	9.60063e-13	6.71682e-11	Up	Anthranilate synthase alpha 2 subunit.
Os03g0268600	12.56	26.3	1.06623	5.53024e-14	4.55691e-12	Up	Similar to Protein phosphatase type 2C.
Os03g0281900	5.48333	11.4467	1.0618	8.05928e-10	3.45477e-08	Up	ATP-binding cassette (ABC) transporter Hypodermal suberization of roots Salt stress tolerance
Os03g0288000	11.82	36.23	1.61595	8.84985e-08	2.44434e-06	Up	Similar to Metallothionein.
Os03g0289800	4.69	14.4133	1.61974	2.52659e-09	9.70839e-08	Up	Similar to Leucoanthocyanidin dioxygenase-like protein.
Os03g0310600	0.746667	1.5	1.00643	0.00884721	0.0444744	Up	Protein of unknown function DUF247 plant family protein.
Os03g0313800	1.76333	6.93	1.97455	0.00541279	0.0301862	Up	Hypothetical conserved gene.
Os03g0326200	1.31333	3.15333	1.26364	6.40124e-08	1.82583e-06	Up	Similar to aminophospholipid ATPase.
Os03g0350100	26.8233	54.3067	1.01764	1.15561e-07	3.07998e-06	Up	SAR DNA-binding protein-2.
Os03g0363100	0.236667	0.93	1.97437	0.000610038	0.00502532	Up	Armadillo-like helical domain containing protein.
Os03g0405900	19.6233	46.89	1.25671	1.73392e-11	1.01051e-09	Up	Hypothetical conserved gene.
Os03g0437200	0.403333	2.91	2.85097	2.76207e-07	6.81081e-06	Up	C2H2-type zinc finger protein Abscisic acid-induced antioxidant defence Water stress and oxidative stress tolerance
Os03g0439000	0.743333	1.81667	1.28921	0.00495029	0.0280722	Up	Conserved hypothetical protein.
Os03g0561400	0.09	0.36	2	0.00342312	0.020856	Up	Conserved hypothetical protein.
Os03g0570100	1.43333	3.53333	1.30166	7.04097e-09	2.46592e-07	Up	Similar to Cytochrome P450 79A1 (EC 1.14.13.41) (Tyrosine N-monooxygenase) (Cytochrome P450Tyr).
Os03g0571700	6.16667	13.32	1.11103	1.70945e-07	4.40184e-06	Up	Similar to TRANSPARENT TESTA 12 protein.
Os03g0571800	3.80333	8.14667	1.09895	0.00111368	0.00831102	Up	Hypothetical protein.
Os03g0580200	1.21	2.95	1.28571	0.00785074	0.0404383	Up	Lipase GDSL domain containing protein.
Os03g0593600	0.743333	1.52667	1.0383	0.00572241	0.0315578	Up	Similar to Cytochrome P450 family protein expressed.
Os03g0594100	0.77	2.91333	1.91974	4.06169e-09	1.49301e-07	Up	Cytochrome P450 family protein.
Os03g0601000	0.816667	1.69	1.0492	0.00309032	0.0191942	Up	Conserved hypothetical protein.
Os03g0664800	2.17667	4.64	1.092	0.00349582	0.0211892	Up	Acyl-CoA N-acyltransferase domain containing protein.
Os03g0693700	0.09	0.62	2.78427	0.0058818	0.0322689	Up	Similar to Oxalate oxidase 1 (EC 1.2.3.4) (Germin).
Os03g0721900	4.47	12.29	1.45914	2.47043e-08	7.68164e-07	Up	Similar to Histone H2A.
Os03g0734100	14.95	36.72	1.29642	1.53582e-12	1.04015e-10	Up	Conserved hypothetical protein.
Os03g0734500	0.0866667	1.11333	3.68326	0.00776562	0.0401183	Up	Conserved hypothetical protein.
Os03g0740833	1.38	3.19	1.20889	2.16665e-07	5.44212e-06	Up	Conserved hypothetical protein.
Os03g0741000	6.00667	12.2767	1.03128	2.23461e-06	4.22214e-05	Up	Similar to Acyl-[acyl-carrier protein] desaturase.
Os03g0743500	7.7	15.8067	1.0376	7.15691e-06	0.000113896	Up	Calcium-binding EF-hand domain containing protein.
Os03g0758100	15.6867	47.6067	1.60162	4.40994e-31	1.92377e-28	Up	Similar to Phosphorylase (Fragment).
Os03g0759700	1.2	2.94	1.29278	0.000285428	0.00267857	Up	Similar to ER33 protein (Fragment).
Os03g0771100	0.726667	1.79667	1.30596	7.61783e-05	0.000876212	Up	Myb transcription factor domain containing protein.
Os03g0790500	6.12667	22.0133	1.8452	3.76097e-12	2.42007e-10	Up	Alpha/beta hydrolase fold-3 domain containing protein.
Os03g0793900	3.37	7.42667	1.13997	4.62931e-05	0.000570993	Up	Conserved hypothetical protein.
Os03g0797400	7.44	19.3433	1.37846	3.12019e-06	5.61634e-05	Up	Similar to Indole-3-glycerol phosphate lyase.
Os03g0802600	0.876667	2.08333	1.24879	0.00162117	0.0113581	Up	ATPase AAA-type core domain containing protein.
Os03g0829200	1.71333	3.7	1.11072	7.87326e-07	1.68874e-05	Up	Similar to Soluble epoxide hydrolase.
Os03g0829466	0.213333	0.443333	1.05528	0.00825494	0.0420819	Up	Conserved hypothetical protein.
Os03g0830500	0.31	3.17333	3.35566	1.5688e-06	3.08192e-05	Up	Similar to PGPS/D12.
Os03g0834050	1.34	2.78333	1.05458	0.00406822	0.024035	Up	Haloacid dehalogenase-like APase Low-Pi-responsive haloacid dehalogenase (HAD)-like hydrolase Pi homeostasis
Os04g0103500	2.03	4.32667	1.09178	2.07026e-07	5.22213e-06	Up	Serine/threonine protein kinase-related domain containing protein.
Os04g0103900	0.0633333	0.546667	3.10962	0.000155138	0.00160237	Up	Similar to Chalcone synthase.
Os04g0104900	1.90667	4.83	1.34097	0.000526822	0.00444852	Up	Similar to 0-methyltransferase (EC 2.1.1.6) (Fragment).
Os04g0172400	1.17667	3.61333	1.61862	8.65804e-09	2.9589e-07	Up	Transferase family protein.
Os04g0178300	8.56333	35.8467	2.06559	8.93069e-05	0.00100348	Up	Similar to Isoform 3 of Syn-copalyl diphosphate synthase.
Os04g0178400	3.43333	9.86	1.52198	2.52744e-07	6.25827e-06	Up	Similar to Cytochrome P450 CYP99A1 (EC 1.14.-.-) (Fragment).
Os04g0179100	0.633333	4.55667	2.84694	3.5949e-06	6.33625e-05	Up	Similar to OSIGBa0109M01.2 protein.
Os04g0179200	1.63	11.8167	2.85788	2.7318e-16	2.94677e-14	Up	Similar to Stem secoisolariciresinol dehydrogenase (Fragment).
Os04g0179700	0.483333	3.04667	2.65614	2.65306e-06	4.89736e-05	Up	9-beta-pimara-7 15-diene synthase Momilactone phytoalexins biosynthesis Defense response
Os04g0180400	0.896667	6.04	2.7519	5.45952e-11	2.88683e-09	Up	Similar to Cytochrome P450 99A2.
Os04g0184100	0.926667	1.85667	1.00259	0.00679881	0.0362213	Up	Similar to OSIGBa0140C02.7 protein.
Os04g0185600	0.376667	1.79333	2.25128	0.000343616	0.00312957	Up	General substrate transporter domain containing protein.
Os04g0188500	1.25667	3.21	1.35297	0.000738626	0.00588204	Up	Conserved hypothetical protein.
Os04g0209200	3.87	8.41667	1.12092	1.01424e-09	4.27363e-08	Up	Similar to MRP-like ABC transporter.
Os04g0252850	0.0133333	0.513333	5.26679	0.00303414	0.0189086	Up	Hypothetical gene.
Os04g0288100	3.70667	13.3467	1.84829	2.70878e-08	8.34404e-07	Up	Similar to Auxin-binding protein ABP20.
Os04g0288500	5.46	12.6267	1.2095	2.47384e-11	1.39513e-09	Up	Protein kinase catalytic domain domain containing protein.
Os04g0301500	1.21	3.05333	1.33538	0.00116999	0.00865169	Up	Helix-loop-helix DNA-binding domain containing protein.
Os04g0316200	2.23333	5.43	1.28175	1.22243e-07	3.24059e-06	Up	Protein of unknown function DUF26 domain containing protein.
Os04g0322100	0.933333	1.9	1.02554	0.00907193	0.0454117	Up	Protein of unknown function DUF26 domain containing protein.
Os04g0345400	0.283333	1.56667	2.46713	2.03998e-10	9.90411e-09	Up	Similar to OSIGBa0106G08.7 protein.
Os04g0371100	0.0333333	0.236667	2.82782	0.00475507	0.0272096	Up	Similar to OSIGBa0134J07.7 protein.
Os04g0373400	7.07333	28.6967	2.02042	1.4791e-14	1.32156e-12	Up	Similar to MATE efflux family protein expressed.
Os04g0395800	1.20667	3.74667	1.63458	7.88293e-08	2.19774e-06	Up	Tify domain containing protein.
Os04g0401700	12.6267	52.3867	2.05273	5.21707e-24	1.26852e-21	Up	Potassium transporter Potassium mediated growth Salt tolerance
Os04g0404400	0.0533333	0.513333	3.26679	0.00223976	0.0148043	Up	Similar to H0502B11.4 protein.
Os04g0409200	59.2967	132.703	1.16218	8.04137e-33	3.97565e-30	Up	Starch branching enzyme IIa Starch biosynthesis Regulation of the properties of sugary endosperm
Os04g0415800	0.81	4.24333	2.3892	4.03714e-06	6.96564e-05	Up	Similar to OSIGBa0092M08.2 protein.
Os04g0453500	2.53667	5.42333	1.09625	1.15075e-10	5.79555e-09	Up	Conserved hypothetical protein.
Os04g0459700	10.8367	25.44	1.23118	1.81074e-09	7.21958e-08	Up	Similar to H0219H12.3 protein.
Os04g0462400	1.02333	2.33667	1.19118	0.00180097	0.0124011	Up	Similar to lysine/histidine transporter.
Os04g0480200	3.08667	9.83667	1.67212	0.00185597	0.0127149	Up	Transporter high affinity nitrate Nar2 domain containing protein.
Os04g0486950	1.58333	3.20333	1.01661	0.000149771	0.00155724	Up	Similar to Malate synthase.
Os04g0493400	122.15	315.76	1.37017	2.71566e-13	2.08698e-11	Up	Similar to Chitinase.
Os04g0506800	0.436667	1.85667	2.08811	3.77626e-05	0.000478509	Up	Glycosyl transferase family 29 protein.
Os04g0514600	0.933333	2.45667	1.39624	3.23116e-05	0.000418073	Up	Similar to NBS-LRR type disease resistance protein O2 (Fragment).
Os04g0518400	6.28	15.09	1.26476	4.10145e-08	1.23019e-06	Up	Similar to Phenylalanine ammonia-lyase (Fragment).
Os04g0523500	0.116667	0.566667	2.28011	0.000902551	0.00696858	Up	Hypothetical conserved gene.
Os04g0531900	11.17	28.96	1.37443	5.22818e-22	1.02032e-19	Up	Short-chain dehydrogenase/reductase SDR domain containing protein.
Os04g0538900	2.15667	5.73667	1.41141	0.00485721	0.0276896	Up	Glyoxalase/bleomycin resistance protein/dioxygenase domain containing protein.
Os04g0556400	1.26333	5.71333	2.1771	2.74763e-13	2.10609e-11	Up	Similar to UDP-glycosyltransferase UGT93B9.
Os04g0562100	5.99333	12.29	1.03605	7.45614e-12	4.61751e-10	Up	Amino acid transporter transmembrane domain containing protein.
Os04g0573900	9.04333	18.41	1.02556	6.33985e-09	2.23887e-07	Up	Similar to cDNA clone:001-036-C03 full insert sequence.
Os04g0580866	1.71333	3.68333	1.10421	0.00563188	0.0311803	Up	Hypothetical conserved gene.
Os04g0585900	1.09333	3.15	1.52662	0.000121835	0.00131184	Up	Protein of unknown function DUF581 family protein.
Os04g0597600	0.19	1.00333	2.40073	5.65891e-05	0.000676333	Up	TGF-beta receptor type I/II extracellular region family protein.
Os04g0600200	13.8633	38.3233	1.46695	1.17123e-17	1.44764e-15	Up	Homodimeric diiron-carboxylate protein Cyanide-resistant respiration in mitochondria Reactive oxygen species (ROS) scavenging
Os04g0600300	2.81	9.46667	1.75229	4.09294e-08	1.22888e-06	Up	Homodimeric diiron-carboxylate protein Cyanide-resistant respiration in mitochondria Reactive oxygen species (ROS) scavenging
Os04g0611700	0.001	0.15	7.22882	0.00215525	0.0143671	Up	Similar to Ent-kaurene synthase-like 3.
Os04g0616600	1.38	4.8	1.79837	1.79698e-09	7.18405e-08	Up	Serine/threonine protein kinase-related domain containing protein.
Os04g0624800	0.736667	1.88667	1.35676	0.000602765	0.00497632	Up	Aldo/keto reductase domain containing protein.
Os04g0625350	0.503333	1.34	1.41265	3.74367e-07	8.84174e-06	Up	Similar to OSIGBa0148A10.3 protein.
Os04g0633800	0.0566667	0.433333	2.9349	0.0011589	0.00859137	Up	Protein kinase catalytic domain domain containing protein.
Os04g0640200	0.00666667	0.12	4.16993	0.0011031	0.00824445	Up	Conserved hypothetical protein.
Os04g0640300	1.26333	3.63667	1.52538	2.9234e-06	5.31696e-05	Up	Similar to OSIGBa0138H21-OSIGBa0138E01.10 protein.
Os04g0654500	0.556667	1.59333	1.51716	7.62611e-05	0.000876826	Up	Conserved hypothetical protein.
Os04g0655400	0.06	0.56	3.22239	0.00256455	0.0165236	Up	Similar to OSIGBa0147J19.10 protein.
Os04g0660900	0.01	0.17	4.08746	0.00358899	0.0216719	Up	TGF-beta receptor type I/II extracellular region family protein.
Os04g0661100	0.54	1.65333	1.61435	0.00699083	0.037038	Up	Similar to H0112G12.8 protein.
Os04g0666800	6.02333	12.5733	1.06173	3.75983e-05	0.000477038	Up	Similar to H1005F08.21 protein.
Os04g0669900	14.8467	42.8833	1.53028	1.22348e-24	3.24047e-22	Up	Similar to H0818H01.11 protein.
Os04g0674700	6.49333	16.2033	1.31926	1.60834e-06	3.15123e-05	Up	Similar to AMP-binding protein (Adenosine monophosphate binding protein 5 AMPBP5).
Os04g0674800	0.07	0.473333	2.75743	0.00425008	0.0249011	Up	Similar to CEL1%3DCELLULASE 1 (Fragment).
Os04g0677300	0.886667	4.87	2.45746	6.68036e-06	0.000107699	Up	Harpin-induced 1 domain containing protein.
Os05g0104700	0.303333	0.786667	1.37485	0.00477603	0.0273137	Up	Leucine-rich repeat (LRR) protein Inhibitor of fungal polygalacturonase Defence response
Os05g0111200	20.3267	52.3767	1.36555	4.83289e-19	6.95936e-17	Up	Similar to Amino acid selective channel protein.
Os05g0118900	2.52	5.60333	1.15286	0.00201123	0.0135637	Up	Hypothetical protein.
Os05g0119000	5.34333	19.6767	1.88067	8.78598e-14	7.06307e-12	Up	Bacterial-type ATP binding cassette (ABC) transporter Al tolerance
Os05g0119100	0.923333	2.74	1.56925	0.00152623	0.0107853	Up	Hypothetical protein.
Os05g0130300	3.98667	11.4267	1.51915	1.14625e-06	2.33211e-05	Up	Conserved hypothetical protein.
Os05g0135450	1.50333	3.45667	1.20122	0.00760016	0.0394008	Up	Hypothetical protein.
Os05g0142900	0.936667	2.39333	1.35341	0.00245576	0.0159421	Up	Conserved hypothetical protein.
Os05g0149400	67.7833	158.18	1.22256	9.77314e-12	5.94079e-10	Up	ACC oxidase Ethylene biosynthesis
Os05g0177000	1.11333	2.49667	1.16512	0.000794464	0.00624953	Up	Cyclin-like F-box domain containing protein.
Os05g0194900	4.21667	11.57	1.45621	2.17169e-08	6.87524e-07	Up	Similar to Pyrophosphate-fructose-6-phosphate 1-phosphotransferase-like protein (Pyrophosphate-dependent phosphofructo-1-kinase-like protein).
Os05g0198200	7.48667	22.9233	1.61442	7.64119e-06	0.000120504	Up	Thioredoxin fold domain containing protein.
Os05g0211100	0.793333	1.87	1.23704	0.00239706	0.0156415	Up	Similar to Cytochrome P450-like protein.
Os05g0228000	0.08	0.766667	3.26053	0.00065511	0.00532125	Up	Purine and other phosphorylases family 1 protein.
Os05g0241100	0.643333	2.51	1.96405	9.31557e-16	9.4313e-14	Up	Similar to predicted protein.
Os05g0243100	1.30667	2.93667	1.16829	0.000107311	0.00117075	Up	Similar to 50S ribosomal protein L13.
Os05g0277000	0.07	1.13667	4.02131	0.000431211	0.00375666	Up	Similar to Expansin Os-EXPA3.
Os05g0311801	0.0166667	0.443333	4.73335	0.000906394	0.00699643	Up	Similar to Isopentenyl transferase IPT7.
Os05g0318100	0.693333	1.96333	1.50168	0.00264242	0.0169188	Up	Similar to Protein kinase-related protein.
Os05g0324700	3.91	9.84	1.33149	0.0048401	0.0276056	Up	Conserved hypothetical protein.
Os05g0360400	1.94	3.99333	1.04154	0.00298733	0.0186875	Up	Zinc finger RING/FYVE/PHD-type domain containing protein.
Os05g0361500	1.05667	2.41667	1.1935	0.000157362	0.00162252	Up	Similar to Pectinesterase.
Os05g0370700	0.31	1.31	2.07923	6.11374e-05	0.000722496	Up	Alpha/beta hydrolase family protein.
Os05g0373900	1.8	3.81	1.08179	3.08807e-05	0.0004039	Up	Similar to Eukaryotic peptide chain release factor subunit 1 (eRF1) (Eukaryotic release factor 1) (TB3-1) (Cl1 protein).
Os05g0393700	6.81	15.8867	1.22209	1.76644e-24	4.59646e-22	Up	Similar to Isoamylase-type starch debranching enzyme ISO2.
Os05g0399800	0.113333	0.533333	2.23447	0.00372685	0.0223611	Up	Leucine-rich repeat N-terminal domain containing protein.
Os05g0404700	0.213333	1.00333	2.23362	0.00153903	0.0108622	Up	Similar to MBD1.
Os05g0427400	17.0733	34.3333	1.00787	1.3248e-05	0.000194876	Up	Similar to Phenylalanine ammonia-lyase.
Os05g0432200	1.20667	2.93667	1.28315	0.000371244	0.00332606	Up	Similar to Gibberellin-regulated protein 2 precursor.
Os05g0434800	3.09333	7.00333	1.17888	0.00065008	0.00528908	Up	Protein of unknown function DUF1218 domain containing protein.
Os05g0444200	3.68	10.24	1.47644	5.06015e-09	1.83177e-07	Up	Similar to T6J4.5 protein (WIP6 protein).
Os05g0447700	13.3867	43.63	1.70452	1.30575e-50	1.29112e-47	Up	Tetratricopeptide-like helical domain containing protein.
Os05g0447800	1.57667	4.02	1.35032	0.000444823	0.00385037	Up	Similar to H0212B02.6 protein.
Os05g0456800	1.36	2.75667	1.01932	3.40894e-06	6.05525e-05	Up	Hypothetical gene.
Os05g0486100	2.70333	5.74667	1.08799	3.09675e-05	0.000404857	Up	Leucine-rich repeat receptor-like kinase Mn<sup>2+</sup>/Mg<sup>2+</sup>-dependent serine/threonine (Ser/Thr) kinase Ca<sup>2+</sup>-independent Ser/Thr kinase Negative regulation of polar auxin transport Root development
Os05g0488100	3.22	8.42	1.38676	5.68957e-09	2.03589e-07	Up	Conserved hypothetical protein.
Os05g0500000	0.001	0.773333	9.59495	2.03541e-07	5.14734e-06	Up	UDP-glucuronosyl/UDP-glucosyltransferase family protein.
Os05g0501500	0.186667	0.616667	1.72403	0.00048851	0.00416772	Up	Hypothetical protein.
Os05g0506000	9.57	73.7767	2.94657	3.97028e-121	2.35549e-117	Up	Similar to MS5-like protein (Fragment).
Os05g0506800	0.0866667	0.443333	2.35484	0.00229357	0.0150824	Up	Hypothetical conserved gene.
Os05g0522600	15.5667	38.2133	1.29562	7.53912e-20	1.18958e-17	Up	Leucine-rich repeat plant specific containing protein.
Os05g0524500	0.1	0.473333	2.24286	0.00626608	0.0339317	Up	Protein kinase core domain containing protein.
Os05g0526900	2.98333	7.66	1.36042	9.39618e-13	6.58932e-11	Up	UDP-glucuronosyl/UDP-glucosyltransferase family protein.
Os05g0530400	3.11	7.28333	1.22768	6.86771e-07	1.50017e-05	Up	Heat stress transcription factor Spl7 (Heat shock transcription factor) (Heat shock factor RHSF10).
Os05g0545400	0.58	1.92	1.72698	0.000871988	0.00676253	Up	Serine/threonine protein kinase domain containing protein.
Os05g0547600	8.39333	19.1333	1.18877	5.04293e-09	1.82877e-07	Up	Hypothetical protein.
Os05g0550800	2.26	5.46333	1.27346	7.34618e-07	1.58948e-05	Up	Serine/threonine protein kinase domain containing protein.
Os05g0575000	0.423333	2.00667	2.24493	0.000814159	0.00637067	Up	Similar to predicted protein.
Os05g0576600	5.87667	17.83	1.60124	6.31443e-09	2.23374e-07	Up	Conserved hypothetical protein.
Os05g0580500	0.506667	1.23667	1.28735	4.61998e-05	0.00057008	Up	Similar to 10A19I.14.
Os05g0583000	2.66333	6.80667	1.35372	4.40379e-11	2.37085e-09	Up	Similar to WRKY8.
Os05g0583200	0.43	1.46	1.76356	1.98301e-11	1.13779e-09	Up	Zinc finger BED-type predicted domain containing protein.
Os05g0595300	31.8967	76.62	1.26432	4.30177e-14	3.64594e-12	Up	NRR alternative splicing variant Regulation of root development in response to macronutrient deficiency
Os06g0112700	0.933333	2.89	1.63061	9.40252e-06	0.000144967	Up	Similar to Typical P-type R2R3 Myb protein (Fragment).
Os06g0133500	4.93667	13.3333	1.43343	0.000795813	0.00625848	Up	Conserved hypothetical protein.
Os06g0141100	2.41333	5.06	1.06811	0.000174815	0.0017735	Up	Monosaccharide transporter.
Os06g0145200	0.423333	0.966667	1.19122	0.00583108	0.0320261	Up	Transferase family protein.
Os06g0146600	2.29	6.86333	1.58356	4.94009e-06	8.30741e-05	Up	Hypothetical protein.
Os06g0148700	0.513333	1.24667	1.28011	0.00153178	0.0108188	Up	Conserved hypothetical protein.
Os06g0162700	0.186667	0.533333	1.51457	0.00764882	0.0396184	Up	SANT domain DNA binding domain containing protein.
Os06g0178650	1.25	3.06333	1.29317	0.00789038	0.0406002	Up	Similar to leucoanthocyanidin dioxygenase.
Os06g0191900	0.87	1.96333	1.17422	1.99407e-06	3.82613e-05	Up	Similar to Serine threonine kinase.
Os06g0215100	1.08667	2.57	1.24186	3.46536e-05	0.000443088	Up	Protein of unknown function DUF1645 family protein.
Os06g0215600	3.57	8.63333	1.27399	0.000217034	0.00212983	Up	Similar to Oxo-phytodienoic acid reductase.
Os06g0218300	5.89	12.08	1.03628	0.00020737	0.00204979	Up	Zinc finger RING-type domain containing protein.
Os06g0218900	1.03	2.2	1.09486	0.000176581	0.00178878	Up	Similar to predicted protein.
Os06g0229400	2.48	5.69	1.19809	3.23167e-05	0.000418073	Up	Conserved hypothetical protein.
Os06g0229800	0.0266667	0.423333	3.98868	2.14455e-07	5.39118e-06	Up	Soluble starch synthase II-3 Endosperm starch synthesis Determination of the type of amylopectin structure of starch grain
Os06g0230000	0.766667	8.54667	3.47869	1.17307e-30	4.90112e-28	Up	Hypothetical conserved gene.
Os06g0232700	0.556667	1.31	1.23468	0.000354084	0.00320426	Up	Similar to SWIM zinc finger family protein.
Os06g0249350	0.456667	2.36	2.36957	0.00193967	0.0131697	Up	Conserved hypothetical protein.
Os06g0252300	19.67	41.6133	1.08105	2.77088e-19	4.15128e-17	Up	Hypothetical conserved gene.
Os06g0267450	2.1	4.23333	1.0114	1.85424e-06	3.57867e-05	Up	Hypothetical protein.
Os06g0274800	12.44	27.6833	1.15403	1.31476e-18	1.77278e-16	Up	Similar to Peroxidase 11 precursor (EC 1.11.1.7) (Atperox P11) (ATP23a/ATP23b).
Os06g0313440	1.26333	5.19333	2.03943	4.24833e-08	1.26406e-06	Up	SAM dependent carboxyl methyltransferase domain containing protein.
Os06g0315000	1.11667	6.47667	2.53605	2.32123e-10	1.11781e-08	Up	SAM dependent carboxyl methyltransferase domain containing protein.
Os06g0320200	0.9	1.82	1.01594	0.00456216	0.0263908	Up	Similar to OSIGBa0135C13.7 protein.
Os06g0474800	0.343333	1.21667	1.82525	0.000131958	0.00140352	Up	Similar to 3Fe-4S ferredoxin.
Os06g0486900	0.693333	9.07667	3.71054	0.000127914	0.0013675	Up	Similar to Formate dehydrogenase mitochondrial precursor (EC 1.2.1.2) (NAD- dependent formate dehydrogenase) (FDH).
Os06g0493100	20.8533	60.47	1.53594	9.98033e-15	9.05371e-13	Up	Conserved hypothetical protein.
Os06g0501900	1.99333	4.05333	1.02393	4.98669e-05	0.000609012	Up	Cytochrome P450 family protein.
Os06g0549600	0.27	0.966667	1.84006	0.0053132	0.0297491	Up	FAD-linked oxidase FAD-binding subdomain 2 domain containing protein.
Os06g0549900	1.31667	4.38333	1.73514	6.94066e-06	0.000111073	Up	FAD linked oxidase N-terminal domain containing protein.
Os06g0553001	2.29	7.58667	1.72812	0.000416188	0.0036526	Up	Conserved hypothetical protein.
Os06g0553100	2.88333	6.83333	1.24485	1.0181e-05	0.000155674	Up	Similar to Heat stress transcription factor C-2b.
Os06g0569500	7.32	21.39	1.54702	5.47707e-09	1.96459e-07	Up	Ent-kaurene oxidase Diterpenoid phytoalexin biosynthesis
Os06g0586000	4.2	23.9267	2.51016	4.59377e-16	4.81518e-14	Up	Conserved hypothetical protein.
Os06g0586150	0.206667	0.73	1.82059	4.37491e-06	7.46276e-05	Up	Protein kinase catalytic domain domain containing protein.
Os06g0591200	32.8067	109.767	1.74238	7.6738e-17	8.75522e-15	Up	Conserved hypothetical protein.
Os06g0591400	32.7767	145.18	2.1471	1.29233e-14	1.16522e-12	Up	Conserved hypothetical protein.
Os06g0599200	8.74	19.09	1.12711	8.72368e-08	2.41174e-06	Up	Cytochrome P450 family protein.
Os06g0606700	46.54	139.67	1.58548	7.57668e-09	2.63797e-07	Up	Tetratricopeptide-like helical domain containing protein.
Os06g0649000	1.00333	5.33	2.40933	2.97334e-08	9.1117e-07	Up	PAMP (pathogen-associated molecular pattern)-responsive transrepressor Defense response
Os06g0681200	3.10333	8.41667	1.43943	0.000566495	0.00472434	Up	Cupredoxin domain containing protein.
Os06g0683100	2.10333	5.61	1.41532	2.02328e-09	7.94607e-08	Up	NAD(P)-binding domain containing protein.
Os07g0104500	0.443333	1.18333	1.41639	0.00859777	0.0434784	Up	Haem peroxidase plant/fungal/bacterial family protein.
Os07g0113600	0.0133333	0.316667	4.56986	0.000712043	0.00570249	Up	Hypothetical conserved gene.
Os07g0115500	11.3633	36.95	1.70119	4.93958e-13	3.65406e-11	Up	Hypothetical protein.
Os07g0118200	1.62	3.88333	1.2613	0.00632603	0.0342	Up	Protein of unknown function DUF538 domain containing protein.
Os07g0121100	0.16	0.456667	1.51307	0.00321527	0.01985	Up	Protein of unknown function DUF1719 Oryza sativa family protein.
Os07g0121800	5.76	12.2033	1.08313	7.53129e-18	9.54736e-16	Up	Protein of unknown function DUF1719 Oryza sativa domain containing protein.
Os07g0122100	1.63333	4.73667	1.53605	3.34294e-09	1.25208e-07	Up	Protein of unknown function DUF1719 Oryza sativa family protein.
Os07g0124900	7.01333	22.41	1.67597	6.09984e-05	0.000721187	Up	Allergen V5/Tpx-1 related family protein.
Os07g0125500	15.2267	48.7633	1.6792	0.0037349	0.0224003	Up	Allergen V5/Tpx-1 related family protein.
Os07g0126301	14.16	44.8967	1.66479	0.00448667	0.0260404	Up	Allergen V5/Tpx-1 related family protein.
Os07g0129200	10.1567	30.5167	1.58717	8.72282e-09	2.9776e-07	Up	Pathogenesis-related 1a protein Regulation of abiotic stress responses
Os07g0129900	0.256667	0.703333	1.45431	0.00767862	0.0397311	Up	Similar to lectin-like receptor kinase 7.
Os07g0130400	2.35667	4.82667	1.03428	2.66571e-08	8.21992e-07	Up	Similar to Lectin-like receptor kinase 7%3B2.
Os07g0150700	18.86	45.72	1.2775	7.49626e-17	8.58567e-15	Up	Serine/threonine protein kinase Pollination and drought stress responses Reguration of potassium uptake by CBL1-CIPK23 complex
Os07g0151800	7.36	15.9167	1.11276	3.32048e-07	7.97559e-06	Up	Conserved hypothetical protein.
Os07g0174400	1.55	5.04667	1.70306	0.000157683	0.00162414	Up	Similar to Non-specific lipid-transfer protein.
Os07g0174900	0.363333	1.48333	2.02948	0.00260949	0.016726	Up	Plant lipid transfer protein and hydrophobic protein helical domain containing protein.
Os07g0182100	18.9567	41.14	1.11784	0.000175721	0.00178147	Up	Similar to Tryptophan synthase alpha chain.
Os07g0188000	0.0133333	0.103333	2.9542	0.00735941	0.0384619	Up	Similar to Argonaute 4 protein.
Os07g0190000	12.4133	25.0233	1.01138	6.63213e-09	2.32823e-07	Up	Similar to 1-deoxy-D-xylulose 5-phosphate synthase 2 precursor.
Os07g0192000	3.50667	9.02667	1.36409	1.05556e-07	2.84656e-06	Up	ATPase AAA-type core domain containing protein.
Os07g0196300	1.66667	3.36333	1.01293	0.000829639	0.0064729	Up	Cyclin-like F-box domain containing protein.
Os07g0203275	2.66333	5.50667	1.04795	0.00197417	0.0133497	Up	Ribosomal protein S1 RNA-binding domain domain containing protein.
Os07g0217600	0.51	3.72667	2.86932	1.19774e-09	4.98312e-08	Up	CytochromeP450 monooxygenase Diterpenoid phytoalexin biosynthesis Bacterial blight resistance
Os07g0218700	0.593333	11.3367	4.25601	5.5071e-38	3.63028e-35	Up	Cytochrome P450 family protein.
Os07g0224900	6	14.3033	1.25332	0.000143356	0.00150319	Up	WD40 repeat-like domain containing protein.
Os07g0262800	0.246667	0.77	1.6423	0.00688947	0.036586	Up	Similar to Resistance protein candidate (Fragment).
Os07g0274700	24.8633	54.42	1.13012	1.31057e-07	3.45878e-06	Up	HvB12D protein (B12Dg1 protein).
Os07g0283050	1.40333	5.10667	1.86352	4.42477e-06	7.53049e-05	Up	Concanavalin A-like lectin/glucanase subgroup domain containing protein.
Os07g0283125	0.756667	2.27	1.58496	0.00125627	0.00918073	Up	Similar to lectin-like receptor kinase 7.
Os07g0410700	0.263333	1.01	1.93939	0.00480409	0.0274304	Up	Similar to Ethylene-responsive element binding protein 1.
Os07g0416700	2.25333	6.55	1.53943	6.63857e-08	1.88143e-06	Up	Conserved hypothetical protein.
Os07g0416900	0.336667	1.50667	2.16197	1.15648e-05	0.000173944	Up	Similar to Omega-6 fatty acid desaturase endoplasmic reticulum isozyme 2 (EC 1.14.19.-).
Os07g0417200	0.513333	2.57	2.3238	6.54519e-05	0.000764095	Up	Similar to Delta 12 oleic acid desaturase FAD2.
Os07g0450000	19.4467	40.2867	1.05078	2.0614e-09	8.04598e-08	Up	Similar to 60S ribosomal protein L44.
Os07g0480800	12.5333	30.89	1.30137	7.96507e-16	8.14744e-14	Up	Cellulase (EC 3.2.1.4).
Os07g0489000	0.001	0.386667	8.59495	0.000782051	0.0061781	Up	Plant lipid transfer protein/Par allergen family protein.
Os07g0516300	14.6433	48.7733	1.73585	4.54727e-13	3.3892e-11	Up	Protein of unknown function DUF584 family protein.
Os07g0522500	15.94	54.8533	1.78293	2.50509e-12	1.64405e-10	Up	Similar to PDR6 ABC transporter.
Os07g0526600	0.71	2.68667	1.91993	4.32132e-06	7.38117e-05	Up	Alpha/beta hydrolase fold-3 domain containing protein.
Os07g0537250	1.42333	3.29333	1.21027	8.00803e-10	3.43778e-08	Up	Hypothetical gene.
Os07g0538000	0.446667	1.24333	1.47694	0.000492917	0.00419687	Up	Similar to hydrolase hydrolyzing O-glycosyl compounds.
Os07g0541200	3.10667	9.48	1.60952	3.07493e-10	1.44327e-08	Up	Similar to receptor-like serine-threonine protein kinase.
Os07g0542600	0.75	1.57	1.0658	0.00455111	0.0263474	Up	Similar to receptor-like protein kinase RK20-1.
Os07g0550500	2.49	5.82667	1.22653	5.06354e-09	1.83177e-07	Up	Hypothetical conserved gene.
Os07g0550600	0.0833333	1.04667	3.65076	2.05179e-05	0.000283882	Up	Transferase family protein.
Os07g0550900	1.26667	3.45	1.44556	2.74733e-11	1.5435e-09	Up	Similar to Receptor-like protein kinase 6.
Os07g0552800	0.163333	0.563333	1.78617	0.00202355	0.0136331	Up	Cellulose synthase family protein.
Os07g0569800	0.323333	0.943333	1.54475	0.000152017	0.00157617	Up	Similar to protein kinase.
Os07g0582450	1.86667	7.75667	2.05497	2.6342e-20	4.46519e-18	Up	Hypothetical gene.
Os07g0584200	0.43	0.903333	1.07092	0.00682307	0.0363114	Up	BTB/POZ fold domain containing protein.
Os07g0584283	0.196667	0.956667	2.28226	0.00117025	0.00865169	Up	Hypothetical protein.
Os07g0586100	2.22	5.54667	1.32106	7.4269e-08	2.08431e-06	Up	Similar to Esterase precursor (EC 3.1.1.-) (Early nodule-specific protein homolog) (Latex allergen Hev b 13).
Os07g0592600	4.15	10.42	1.32817	3.86457e-10	1.79123e-08	Up	Indole-3-acetic acid (IAA)-amido synthetase Auxin signaling and defense signaling in a pathogen-nonspecific manner
Os07g0603100	5.06667	10.1367	1.00047	5.65381e-06	9.33303e-05	Up	Nucleotide-binding alpha-beta plait domain containing protein.
Os07g0604300	1.10667	2.35	1.08644	0.000132816	0.00141011	Up	Similar to Phytochelatin synthetase (Fragment).
Os07g0635500	1.58667	3.88667	1.29253	4.19221e-06	7.18831e-05	Up	Similar to Cytochrome P450.
Os07g0643800	7.16333	16.84	1.23319	1.13258e-06	2.30588e-05	Up	Similar to Dirigent protein.
Os07g0645300	0.363333	1.89	2.37902	0.00101761	0.00770451	Up	Protein of unknown function DUF679 family protein.
Os07g0646400	0.08	0.39	2.2854	0.0025382	0.0163856	Up	Conserved hypothetical protein.
Os07g0663900	0.08	0.56	2.80735	0.00336908	0.0206075	Up	Similar to Oxidoreductase short chain dehydrogenase/reductase family protein expressed.
Os07g0665900	6.82	13.6433	1.00035	7.82722e-09	2.722e-07	Up	Peptidase trypsin-like serine and cysteine domain containing protein.
Os07g0677200	187.88	410.55	1.12775	7.66416e-22	1.47666e-19	Up	Peroxidase.
Os07g0677500	0.31	3.38	3.44668	1.0756e-09	4.51294e-08	Up	Similar to Peroxidase precursor (EC 1.11.1.7).
Os07g0686800	1.32667	2.82	1.08789	0.00588821	0.0322894	Up	Similar to Serine/threonine protein kinase-like.
Os08g0112300	1.84667	9.94	2.42832	8.0184e-20	1.25188e-17	Up	Transferase domain containing protein.
Os08g0124500	1.75667	3.59667	1.03382	1.07217e-06	2.20103e-05	Up	Similar to Resistance protein candidate (Fragment).
Os08g0137800	0.853333	5.00333	2.55171	3.86523e-06	6.72087e-05	Up	Cupredoxin domain containing protein.
Os08g0137900	0.516667	2.08667	2.01389	0.00564884	0.0312334	Up	Similar to Chemocyanin precursor (Basic blue protein) (Plantacyanin).
Os08g0140300	1.00333	9.44	3.23399	1.41989e-13	1.12319e-11	Up	Aromatic L-amino acid decarboxylase (AADC) Senescence-induced serotonin biosynthesis
Os08g0148267	2.02333	11.7333	2.53581	1.12937e-32	5.40349e-30	Up	Hypothetical conserved gene.
Os08g0156100	1.69333	4.65667	1.45943	0.00144058	0.0102774	Up	Conserved hypothetical protein.
Os08g0156900	2.44333	8.03667	1.71775	2.20891e-06	4.18423e-05	Up	Spo11/DNA topoisomerase VI subunit A family protein.
Os08g0162033	3.73667	8.11	1.11795	1.57119e-05	0.000226435	Up	Similar to 50S ribosomal protein L13.
Os08g0170700	0.386667	1.01	1.38519	0.00442829	0.0257547	Up	Disease resistance protein domain containing protein.
Os08g0173600	7.72	16.2233	1.0714	9.75849e-07	2.02999e-05	Up	Conserved hypothetical protein.
Os08g0189500	1.54667	3.53667	1.19323	0.00608661	0.0331717	Up	Germin-like protein 8-6 Disease resistance
Os08g0189700	0.833333	2.11333	1.34255	0.00492931	0.0280228	Up	Germin-like protein 8-8 Disease resistance
Os08g0203100	0.356667	1.13333	1.66792	1.94655e-05	0.000271857	Up	Hypothetical conserved gene.
Os08g0203201	0.863333	2.55	1.56251	0.00877442	0.0441609	Up	Similar to SHR5-receptor-like kinase (Fragment).
Os08g0205900	23.7767	51.4	1.11222	9.10501e-25	2.45537e-22	Up	Similar to Viroid RNA-binding protein (Fragment).
Os08g0299400	0.436667	1.38667	1.66702	1.95352e-05	0.000272574	Up	Similar to MGDG synthase type A.
Os08g0320400	10.8733	25.25	1.21549	3.51392e-16	3.7095e-14	Up	Similar to Indole-3-glycerol phosphate synthase-like.
Os08g0330900	2.08	4.46	1.10046	0.00385622	0.0229931	Up	Conserved hypothetical protein.
Os08g0331000	6.08	15.16	1.31813	1.68771e-06	3.29154e-05	Up	Conserved hypothetical protein.
Os08g0331900	0.77	1.59	1.0461	0.00276918	0.0175598	Up	Similar to Leucine Rich Repeat family protein expressed.
Os08g0334900	1.10667	2.26333	1.03223	0.000210783	0.00207795	Up	Xyloglucan fucosyltransferase family protein.
Os08g0368000	1.65333	3.48667	1.07647	2.48306e-05	0.000334503	Up	Similar to Coatomer delta subunit (Delta-coat protein) (Delta-COP).
Os08g0374600	0.333333	6.47	4.27873	1.2918e-09	5.32964e-08	Up	Similar to Receptor kinase-like protein.
Os08g0384500	6.94333	18.4467	1.40966	8.74127e-14	7.04622e-12	Up	ABC transporter-like domain containing protein.
Os08g0391000	0.506667	1.88667	1.89673	0.00311361	0.0193186	Up	Hypothetical protein.
Os08g0398300	1.12	2.42	1.11151	6.30024e-05	0.00074016	Up	ABC transporter-like domain containing protein.
Os08g0413100	0.0133333	0.266667	4.32193	0.00978748	0.0482654	Up	Protein of unknown function DUF1262 domain containing protein.
Os08g0434300	12.4233	37.7867	1.60482	5.59266e-20	9.01635e-18	Up	Similar to Malate dehydrogenase precursor (EC 1.1.1.37).
Os08g0448000	7.09	14.6833	1.05032	5.74035e-05	0.000684137	Up	4-coumarate:coenzyme A ligase Lignin biosynthesis Defense against wounding
Os08g0468901	0.113333	0.48	2.08246	0.00314112	0.0194649	Up	Hypothetical protein.
Os08g0476900	0.363333	0.88	1.27621	0.00821538	0.041909	Up	Similar to Patatin-like protein 1.
Os08g0507100	0.26	0.826667	1.66879	0.000686094	0.00552601	Up	Cytochrome P450 family protein.
Os08g0508000	1.56	5.95	1.93134	3.83966e-06	6.68818e-05	Up	Cytochrome P450 family protein.
Os08g0508700	0.936667	5.99333	2.67775	4.20401e-20	6.92821e-18	Up	Similar to EIL3.
Os08g0508800	4.46	9.67667	1.11747	2.64925e-06	4.89337e-05	Up	Lipoxygenase chloroplast precursor (EC 1.13.11.12).
Os08g0514000	0.506667	1.63667	1.69165	6.97544e-05	0.000809544	Up	Protein kinase catalytic domain domain containing protein.
Os08g0514033	0.373333	1.32667	1.82927	0.00401477	0.0237855	Up	Hypothetical protein.
Os08g0521000	0.866667	1.77333	1.03291	0.00480476	0.0274304	Up	Protein of unknown function DUF599 family protein.
Os08g0527800	0.0566667	0.35	2.62678	0.0021483	0.0143336	Up	Similar to Ubiquitin carboxyl-terminal hydrolase.
Os08g0531000	35.4633	75.23	1.08498	4.9321e-10	2.20908e-08	Up	Nucleotide pyrophosphatase/phosphodiesterase Negative effect on plant growth and starch accumulation
Os08g0538100	0.226667	0.793333	1.80735	0.00366099	0.0220239	Up	Hypothetical gene.
Os08g0559501	0.913333	2.08667	1.19199	0.00825901	0.0420882	Up	Conserved hypothetical protein.
Os08g0559700	2.36	4.74333	1.00711	0.000627513	0.0051416	Up	Protein of unknown function DUF3245 domain containing protein.
Os08g0562300	1.25667	3.28667	1.38702	4.2608e-06	7.29749e-05	Up	Zinc finger C2H2-type domain containing protein.
Os09g0255400	2.15667	15.05	2.80289	1.35056e-28	4.65849e-26	Up	Similar to Indole-3-glycerol phosphate synthase chloroplast precursor (EC 4.1.1.48) (IGPS).
Os09g0298100	1.20667	2.90667	1.26834	2.05564e-06	3.92903e-05	Up	Similar to predicted protein.
Os09g0298200	64.0467	131.423	1.03703	4.43184e-14	3.73484e-12	Up	Similar to Brittle 2.
Os09g0306232	0.04	0.456667	3.51307	0.00323456	0.0199231	Up	Hypothetical gene.
Os09g0316000	1.6	3.83	1.25927	6.58996e-06	0.000106473	Up	Similar to cupin RmlC-type.
Os09g0341500	0.233333	1.43	2.61555	6.8921e-06	0.000110452	Up	F-box domain cyclin-like domain containing protein.
Os09g0341600	0.156667	0.923333	2.55915	1.04234e-05	0.000158726	Up	Cyclin-like F-box domain containing protein.
Os09g0368200	0.0866667	2.73333	4.97904	0.000141531	0.00148667	Up	Similar to polyamine oxidase precursor.
Os09g0378700	0.426667	1.07667	1.33539	0.00973918	0.0481024	Up	Similar to ubiquitin-protein ligase.
Os09g0381300	3.79667	7.73	1.02574	4.47174e-10	2.0345e-08	Up	Pyridoxal phosphate-dependent transferase major region subdomain 1 domain containing protein.
Os09g0396900	4.43	10.0433	1.18086	6.3459e-06	0.000102922	Up	Protein of unknown function DUF125 transmembrane family protein.
Os09g0400400	0.52	1.79333	1.78606	0.00130241	0.00946001	Up	Cinnamyl alcohol dehydrogenase (EC 1.1.1.195).
Os09g0409100	6.83333	29.1767	2.09415	0.00909053	0.0454664	Up	Conserved hypothetical protein.
Os09g0425300	0.31	1.27667	2.04204	0.00322129	0.0198662	Up	Conserved hypothetical protein.
Os09g0439200	7.84667	23.3767	1.57492	1.49627e-15	1.49446e-13	Up	Jasmonate ZIM-domain protein Jasmonate-induced resistance to bacterial blight Repressor of jasmonic acid signaling
Os09g0448200	9.80667	20.1733	1.04061	2.41294e-06	4.51309e-05	Up	Similar to High-affinity potassium transporter.
Os09g0454600	3.66667	9.70333	1.40401	0.000696123	0.00559312	Up	Similar to Mitochondrial phosphate transporter (Fragment).
Os09g0454900	1.23667	2.84333	1.20113	1.80278e-07	4.58642e-06	Up	Serine/threonine protein kinase-related domain containing protein.
Os09g0456800	15.6067	36.7067	1.23388	1.19465e-16	1.32981e-14	Up	Similar to Heat stress transcription factor Spl7 (Heat shock transcription factor) (Heat shock factor RHSF10).
Os09g0457900	0.133333	0.963333	2.853	0.00253871	0.0163856	Up	AP2/ERF transcription factor Regulation of the internode elongation
Os09g0470701	2.25667	4.88	1.11269	0.00493327	0.0280399	Up	Hypothetical gene.
Os09g0472900	18.8067	44.5133	1.24299	0.000181588	0.00182907	Up	Similar to Blight-associated protein p12 precursor.
Os09g0482800	2.58667	6.15333	1.25027	2.48803e-05	0.00033502	Up	EF hand domain containing protein.
Os09g0499400	0.443333	1.93	2.12214	8.81226e-09	3.00468e-07	Up	Domain of unknown function DUF2828 domain containing protein.
Os09g0502500	0.95	2.19	1.20493	0.000386417	0.00343399	Up	Alcohol dehydrogenase superfamily zinc-containing protein.
Os09g0509500	0.76	1.86	1.29123	0.00327295	0.0201095	Up	Diacylglycerol acyltransferase domain containing protein.
Os09g0521300	0.316667	0.883333	1.47999	0.00560366	0.0310357	Up	Similar to TCP family transcription factor.
Os09g0532000	23.8233	55.8567	1.22935	7.86225e-34	4.09168e-31	Up	Senescence-inducible chloroplast protein Activation of the chlorophll-degrading pathway during leaf senescence
Os09g0536800	0.0266667	0.26	3.2854	0.000915737	0.00705386	Up	Hypothetical protein.
Os09g0549700	1.02667	2.13333	1.05514	0.00400354	0.0237332	Up	Similar to 50S ribosomal protein-related.
Os09g0551000	0.0933333	0.72	2.94753	3.05972e-07	7.42138e-06	Up	Protein kinase catalytic domain domain containing protein.
Os09g0551400	0.163333	0.673333	2.0435	0.000412122	0.00362121	Up	Similar to S-locus receptor-like kinase RLK14.
Os09g0561500	0.253333	0.78	1.62244	0.00114403	0.00850324	Up	Wall-associated kinase Rice blast resistance
Os09g0561600	0.223333	0.66	1.56327	0.00399142	0.0236778	Up	Wall-associated receptor-like kinase Regulation of early embryo sac development Female gametophyte development Positive regulation of rice blast resistance
Os09g0570100	6.75	13.9133	1.04351	2.45037e-08	7.63527e-07	Up	Protein kinase catalytic domain domain containing protein.
Os09g0570150	0.0166667	0.456667	4.7761	0.000783687	0.00618937	Up	Hypothetical conserved gene.
Os09g0571200	24.08	52.62	1.12778	1.37411e-07	3.60403e-06	Up	C2 domain containing protein.
Os10g0111400	0.0766667	0.323333	2.07635	0.00465826	0.0268003	Up	Similar to Protein kinase domain containing protein expressed.
Os10g0112100	4.2	8.69333	1.04952	0.00110531	0.00825892	Up	Member of the PLAC8 domain-containing protein family Maintenance of metal ion homeostasis and grain weight Negative regulation of plant height
Os10g0116701	0.001	0.366667	8.51833	1.97702e-05	0.000275206	Up	Hypothetical conserved gene.
Os10g0118800	1.78333	4.21667	1.24153	0.00107597	0.00807221	Up	Hypothetical conserved gene.
Os10g0150200	3.27667	6.76667	1.04622	0.00434605	0.0253632	Up	Sterile alpha motif homology domain containing protein.
Os10g0154500	0.476667	1.60667	1.75302	0.000209144	0.0020632	Up	Similar to cDNA clone: J075187A19 full insert sequence.
Os10g0165300	0.9	2.27667	1.33893	1.05662e-05	0.00016049	Up	Cytochrome P450 family protein.
Os10g0189100	58.0733	130.55	1.16865	3.34628e-17	3.95475e-15	Up	Plastidic phosphoglucomutase Starch synthesis in rice pollen
Os10g0329900	0.976667	2.14	1.13167	0.00983053	0.0484326	Up	Similar to Protein kinase domain containing protein.
Os10g0379854	0.153333	1.03667	2.75721	0.000274904	0.00259706	Up	Hypothetical protein.
Os10g0392400	3.99667	12.04	1.59097	5.22289e-14	4.33982e-12	Up	Tify domain containing protein.
Os10g0394000	1.05	3.25667	1.63301	0.00143312	0.0102291	Up	Similar to GDSL-like Lipase/Acylhydrolase family protein expressed.
Os10g0411600	0.0633333	0.28	2.14439	0.00955082	0.0473613	Up	Hypothetical protein.
Os10g0419400	2.92	18.5767	2.66945	1.83664e-22	3.86398e-20	Up	Similar to SIPL.
Os10g0439800	1.1	7.20333	2.71116	3.13712e-08	9.57404e-07	Up	Similar to H0813E03.1 protein.
Os10g0454200	1.37333	4.55333	1.72924	0.00871208	0.0439291	Up	Eggshell protein family protein.
Os10g0456000	7.26333	17.28	1.2504	0.0021112	0.0141242	Up	Hypothetical protein.
Os10g0467850	0.203333	0.586667	1.52869	0.0019909	0.0134559	Up	Hypothetical protein.
Os10g0491000	58.8833	126.54	1.10366	7.2587e-05	0.000838155	Up	Plant Basic Secretory Protein family protein.
Os10g0491400	3.63333	10.6567	1.55239	1.30865e-05	0.000193133	Up	Conserved hypothetical protein.
Os10g0496000	1.16667	2.35333	1.01231	0.000224776	0.00219046	Up	Zinc finger Dof-type family protein.
Os10g0509401	12.33	93.05	2.91583	5.25767e-05	0.000635548	Up	Conserved hypothetical protein.
Os10g0509600	1.09	8.87	3.02461	3.33118e-05	0.000428145	Up	Conserved hypothetical protein.
Os10g0509700	0.4	1.28667	1.68557	0.000310911	0.00287586	Up	Hypothetical gene.
Os10g0509800	3.48667	7.40333	1.08633	5.14485e-06	8.60298e-05	Up	Conserved hypothetical protein.
Os10g0513900	4.55333	11.17	1.29463	4.42871e-09	1.62189e-07	Up	Cytochrome P450 family protein.
Os10g0520100	0.353333	0.92	1.3806	0.00987294	0.0485666	Up	Cyclin-like F-box domain containing protein.
Os10g0524300	2.76667	6.12	1.14538	6.66341e-05	0.000776369	Up	LysM domain-containing protein Embryo sac development
Os10g0525200	0.001	0.213333	7.73697	0.000120675	0.00130171	Up	Cytochrome P450 family protein.
Os10g0527800	16.16	32.5733	1.01126	0.000169273	0.00172554	Up	Similar to Tau class GST protein 3.
Os10g0529500	5.26667	12.1933	1.21113	2.46109e-08	7.66062e-07	Up	Similar to Glutathione-S-transferase 2.
Os10g0530900	46.3667	103.67	1.16084	1.38931e-08	4.57918e-07	Up	Similar to Glutathione S-transferase GST 30 (EC 2.5.1.18).
Os10g0534600	1.66	3.62	1.12481	0.000139734	0.00146988	Up	Hypothetical protein.
Os10g0535800	3.51333	12.02	1.77452	4.11306e-10	1.89163e-08	Up	Protein of unknown function Cys-rich domain containing protein.
Os10g0552400	4.38	12.2933	1.48887	2.90837e-19	4.33537e-17	Up	Zinc finger RING/FYVE/PHD-type domain containing protein.
Os10g0559500	1.46333	3.49	1.25397	5.959e-08	1.71619e-06	Up	2OG-Fe(II) oxygenase domain containing protein.
Os10g0560000	20.2167	56.57	1.48449	3.67967e-15	3.53249e-13	Up	Protein of unknown function DUF828 plant family protein.
Os10g0568100	0.576667	1.42667	1.30684	0.000456409	0.00392774	Up	Domain of unknown function DUF828 domain containing protein.
Os10g0569400	183.12	437.83	1.25758	4.39828e-10	2.00724e-08	Up	RIR1a protein precursor.
Os10g0569500	1.5	4.51667	1.5903	6.29596e-06	0.00010228	Up	Conserved hypothetical protein.
Os10g0569600	71.0567	182.81	1.3633	1.96062e-09	7.72377e-08	Up	Similar to RIR1b protein precursor.
Os10g0571600	4.40667	17.4133	1.98243	4.49068e-20	7.35976e-18	Up	No apical meristem (NAM) protein domain containing protein.
Os10g0578700	5.37	11.4867	1.09697	5.17641e-11	2.75185e-09	Up	Hypothetical protein.
Os10g0580400	30.4767	68.84	1.17554	1.33522e-11	7.87437e-10	Up	High-affinity urea transporter Effective urea acquisition and utilisation Effective use of low external urea as a N source
Os11g0100200	0.001	0.296667	8.2127	0.000488353	0.00416758	Up	Similar to ALY protein.
Os11g0108932	8.21667	16.77	1.02926	2.51293e-15	2.45209e-13	Up	Similar to Leucine Rich Repeat family protein expressed.
Os11g0126800	2.65667	7.49	1.49535	3.82864e-06	6.6729e-05	Up	Nucleoside phosphatase GDA1/CD39 family protein.
Os11g0134500	11.4333	23.1533	1.01797	2.13025e-09	8.29287e-08	Up	WD40 repeat-like domain containing protein.
Os11g0135400	11.42	24.1733	1.08185	1.7713e-05	0.000251767	Up	60S acidic ribosomal protein P0.
Os11g0138400	1.40333	3.20667	1.19222	0.00461805	0.0266258	Up	Similar to Phosphoglycerate mutase family protein expressed.
Os11g0142500	14.8	35.4967	1.26209	1.16399e-18	1.57664e-16	Up	Isopropylmalate synthase Regulation of seed vigour
Os11g0147150	0.996667	3.08667	1.63087	1.08988e-06	2.23121e-05	Up	Hypothetical gene.
Os11g0149300	1.71	3.69	1.10962	3.0733e-05	0.0004025	Up	Hypothetical protein.
Os11g0151200	0.716667	1.89333	1.40155	3.25113e-06	5.80973e-05	Up	Hypothetical protein.
Os11g0158300	0.56	1.39333	1.31504	1.26231e-06	2.54383e-05	Up	Pentatricopeptide repeat containing protein.
Os11g0171100	0.226667	0.726667	1.68072	0.00237259	0.0155179	Up	Conserved hypothetical protein.
Os11g0210201	6.05667	24.63	2.02382	5.58705e-19	7.968e-17	Up	Conserved hypothetical protein.
Os11g0210500	2.15	4.75	1.14359	0.000359971	0.00324128	Up	Similar to Alcohol dehydrogenase.
Os11g0238400	0.653333	1.96333	1.58741	0.000776069	0.00614505	Up	Protein of unknown function DUF3475 domain containing protein.
Os11g0267400	0.553333	1.22	1.14066	1.83524e-05	0.000258994	Up	Similar to ClpC.
Os11g0303600	0.226667	1.06667	2.23447	0.000154295	0.00159644	Up	Similar to Herbicide safener binding protein.
Os11g0431400	0.001	0.183333	7.51833	0.00110197	0.00823811	Up	Similar to Serine carboxypeptidase.
Os11g0437600	0.493333	4.75333	3.2683	4.44791e-08	1.31811e-06	Up	Protein of unknown function DUF506 plant family protein.
Os11g0450400	0.77	2.72333	1.82244	1.71987e-05	0.000245279	Up	Similar to Sulfotransferase domain containing protein expressed.
Os11g0451700	0.0766667	0.79	3.36518	0.000434309	0.00377589	Up	Similar to Dehydrin DHN1 (M3) (RAB-17 protein).
Os11g0474800	2.39333	5.95667	1.31548	4.68758e-08	1.38255e-06	Up	Similar to Isoform 2 of Stemar-13-ene synthase.
Os11g0474900	2.14333	7.26	1.76011	8.9162e-06	0.000138404	Up	Similar to Stemar-13-ene synthase.
Os11g0482200	1.60667	3.7	1.20345	0.00646104	0.0347967	Up	Pathogenic type III effector avirulence factor Avr cleavage site domain containing protein.
Os11g0482901	1.52333	4.50333	1.56376	8.58084e-10	3.65721e-08	Up	Hypothetical gene.
Os11g0490900	7.57333	15.8733	1.0676	1.9975e-07	5.06443e-06	Up	Similar to WRKY transcription factor 72.
Os11g0514500	3.84667	15.4767	2.00841	1.32506e-05	0.000194876	Up	Sorghum bicolor leucine-rich repeat-containing extracellular glycoprotein precursor.
Os11g0548600	1.36667	3.60333	1.39867	0.000129548	0.00138334	Up	Similar to LysM domain containing protein.
Os11g0549300	0.363333	1.14667	1.65808	0.0080151	0.0410994	Up	Similar to Protein kinase domain containing protein expressed.
Os11g0579200	1.26667	2.64667	1.06314	0.00200001	0.0135021	Up	Similar to Leucine Rich Repeat family protein expressed.
Os11g0582000	4.77	10.7067	1.16645	7.95306e-06	0.000124825	Up	Hypothetical conserved gene.
Os11g0591800	0.723333	3.61333	2.3206	0.000360248	0.00324221	Up	Barwin domain containing protein.
Os11g0592000	63.7767	130.9	1.03736	0.000373554	0.0033407	Up	Similar to Barwin.
Os11g0594000	0.4	2.01	2.32912	1.57338e-09	6.36736e-08	Up	Sugar/inositol transporter domain containing protein.
Os11g0607900	0.43	1.27333	1.5662	0.00233738	0.0153399	Up	Hypothetical conserved gene.
Os11g0626700	0.663333	2.12333	1.67852	8.10515e-09	2.80878e-07	Up	Hypothetical conserved gene.
Os11g0635300	0.14	0.683333	2.28716	0.00169426	0.0117757	Up	Similar to Cytochrome P450 family protein.
Os11g0641500	1.92667	12.47	2.69428	0.00280076	0.0177242	Up	Cupredoxin domain containing protein.
Os11g0642400	0.001	2.04667	10.9991	5.18539e-12	3.29377e-10	Up	Transferase family protein.
Os11g0643100	1.44333	4.00333	1.4718	0.00755642	0.0392289	Up	Transferase family protein.
Os11g0649400	0.383333	1.62667	2.08525	5.72283e-05	0.000683147	Up	Similar to Plant integral membrane protein TIGR01569 containing protein expressed.
Os11g0665600	13.4967	45.9067	1.7661	8.21431e-19	1.13864e-16	Up	Helix-turn-helix Fis-type domain containing protein.
Os11g0666200	1.32	3.71	1.49088	0.000237541	0.00230125	Up	Similar to Protein kinase domain containing protein.
Os12g0132400	4.2	8.93667	1.08935	2.26524e-05	0.000308658	Up	Similar to Grwd-pending-prov protein.
Os12g0135051	0.636667	1.54667	1.28055	0.0066549	0.035608	Up	Similar to Phosphoglycerate mutase family protein expressed.
Os12g0138900	11.3233	30.4267	1.42604	1.46516e-14	1.31307e-12	Up	Isopropylmalate synthase Regulation of seed vigour
Os12g0148600	1.54333	3.43667	1.15496	0.000366053	0.0032865	Up	Conserved hypothetical protein.
Os12g0150200	0.296667	2.19333	2.88621	2.32114e-12	1.53693e-10	Up	Cytochrome P450 enzyme Salt tolerance
Os12g0153200	3.53333	10.6867	1.59671	1.56112e-07	4.0551e-06	Up	Conserved hypothetical protein.
Os12g0161500	0.413333	1.05667	1.35414	0.00016545	0.0016918	Up	Conserved hypothetical protein.
Os12g0191300	0.001	0.203333	7.6677	0.00781417	0.0403059	Up	Similar to Phage head-tail adaptor family protein expressed.
Os12g0197100	0.476667	0.973333	1.02995	0.0049894	0.0282238	Up	Pre-ATP-grasp fold domain containing protein.
Os12g0202700	0.19	1.82333	3.26251	2.16555e-05	0.000297127	Up	Similar to N-methyltransferase.
Os12g0221400	4.4	16.5333	1.9098	3.7725e-11	2.05335e-09	Up	Similar to cDNA clone:001-112-B09 full insert sequence.
Os12g0223000	0.143333	0.506667	1.82166	0.00888949	0.0446567	Up	Hypothetical protein.
Os12g0227400	0.436667	2.79333	2.67738	9.442e-05	0.0010502	Up	Allyl alcohol dehydrogenase.
Os12g0240900	0.21	4.08667	4.28246	0.000279086	0.00262665	Up	Naringenin 7-O-methyltransferase Biosynthesis of flavonoid phytoalexin sakuranetin
Os12g0245000	2.06333	6.19333	1.58574	0.000105684	0.00115725	Up	Conserved hypothetical protein.
Os12g0245100	0.24	0.94	1.96963	5.39948e-06	8.97815e-05	Up	Conserved hypothetical protein.
Os12g0247700	10.17	217.763	4.42037	2.70482e-63	4.22293e-60	Up	Similar to Jasmonate-induced protein.
Os12g0247900	0.06	1.10333	4.20076	2.67277e-06	4.92148e-05	Up	Hypothetical protein.
Os12g0257600	0.496667	5.99333	3.59301	3.25744e-05	0.000420857	Up	Similar to Laccase-25.
Os12g0258700	2.55667	16.3067	2.67313	6.88853e-20	1.10455e-17	Up	Cupredoxin domain containing protein.
Os12g0268000	9.51667	22.78	1.25924	1.9865e-18	2.63069e-16	Up	Similar to Cytochrome P450 71A1 (EC 1.14.-.-) (CYPLXXIA1) (ARP-2).
Os12g0268100	2.73	7.70667	1.49721	1.99953e-08	6.371e-07	Up	Hypothetical protein.
Os12g0270900	0.873333	1.83333	1.06986	0.000990562	0.00752279	Up	Sulfotransferase family protein.
Os12g0277900	0.153333	0.863333	2.49325	0.00343915	0.0209226	Up	Hypothetical conserved gene.
Os12g0424700	0.266667	0.93	1.80219	0.00881702	0.0443452	Up	Serine/threonine protein kinase domain containing protein.
Os12g0434400	1.08	3.05	1.49778	3.1878e-05	0.000413843	Up	Similar to predicted protein.
Os12g0443000	0.17	0.903333	2.40972	3.21513e-05	0.000416479	Up	Similar to Cytochrome P450 family protein expressed.
Os12g0448900	9.18667	19.7767	1.10619	5.71726e-10	2.52001e-08	Up	Fatty acid alpha-dioxygenase family Enzyme that oxygenates fatty acids into 2R-hydroperoxides
Os12g0458100	2.52	18.25	2.8564	0.000160401	0.00164699	Up	Transferase family protein.
Os12g0471100	0.64	2.27667	1.83078	0.000140231	0.00147459	Up	Similar to ATPase 2.
Os12g0491800	1.65	12.8733	2.96385	9.22414e-17	1.04437e-14	Up	Similar to Ent-kaurene synthase 1A.
Os12g0512800	0.48	1.63667	1.76965	0.00283257	0.0178914	Up	Cytochrome P450 71E1 (EC 1.14.13.68) (4-hydroxyphenylacetaldehyde oxime monooxygenase).
Os12g0517100	0.603333	1.28	1.08512	0.000622669	0.00511375	Up	Cyclin-like F-box domain containing protein.
Os12g0555000	51.9333	172.893	1.73515	0.00491499	0.0279736	Up	Similar to Probenazole-inducible protein PBZ1.
Os12g0555200	18.5633	79.4533	2.09765	0.00361014	0.0217621	Up	Similar to Probenazole-inducible protein PBZ1.
Os12g0555500	162.757	375.5	1.2061	1.81671e-05	0.000256868	Up	Pathogen resistance protein PBZ1 17 kDa RNase Disease resistance
Os12g0559200	132.837	492.613	1.8908	7.10672e-06	0.000113402	Up	Lipoxygenase (EC 1.13.11.12).
Os12g0559934	36.07	127.863	1.82573	9.86362e-22	1.88771e-19	Up	Similar to Lipoxygenase.
Os12g0562700	0.303333	0.91	1.58496	0.000144057	0.00150864	Up	Hypothetical conserved gene.
Os12g0568500	0.756667	2.90333	1.93998	0.00840729	0.0426971	Up	Metallothionein-like protein type 1.
Os12g0570400	0.746667	1.67	1.16131	0.00955368	0.0473676	Up	Conserved hypothetical protein.
Os12g0571100	21.3767	65.9733	1.62585	2.1419e-07	5.3891e-06	Up	Metallothionein-like protein ROS (reactive oxygen species) scavenger Antioxidant
Os12g0576750	0.28	0.903333	1.68983	0.000468178	0.00401504	Up	Nucleotide pyrophosphatase Hydrolysis of UDP ADP and adenosine 5'-phosphosulfate
Os12g0578600	0.586667	1.31	1.15895	0.000432827	0.00376742	Up	Zinc finger C2H2-type domain containing protein.
Os12g0578800	0.386667	1.47	1.92665	3.85817e-06	6.71254e-05	Up	Zinc finger C2H2 domain containing protein.
Os12g0594600	0.91	2.95	1.69678	0.00253085	0.0163562	Up	BTB/POZ fold domain containing protein.
Os12g0607000	26.9833	93.6433	1.79511	3.37418e-31	1.49391e-28	Up	Similar to homocysteine S-methyltransferase-2.
Os12g0615900	5.04	10.3633	1.03999	0.00029826	0.00278051	Up	WD40/YVTN repeat-like domain containing protein.
Os12g0616500	1.18	3.07333	1.38102	9.8237e-05	0.00108564	Up	Similar to cation proton exchanger.
Os12g0621500	0.0533333	0.263333	2.30378	0.000429624	0.00374504	Up	Similar to IRE.
Os12g0624800	1.26667	2.61667	1.04669	6.60123e-06	0.000106539	Up	Conserved hypothetical protein.
Os12g0625000	82.7733	184.113	1.15336	1.74237e-23	4.03794e-21	Up	Similar to Cysteine synthase.
Os12g0633700	0.696667	1.46	1.06743	0.00177821	0.01227	Up	Similar to GDP dissociation inhibitor protein OsGDI1.
Os12g0635400	1.10333	5.17667	2.23015	0.0018476	0.0126693	Up	VQ domain containing protein.
Os12g0639200	0.216667	1.10667	2.35267	1.06436e-06	2.18803e-05	Up	Similar to ATPase 3.
Os12g0639500	0.523333	5.93333	3.50304	2.44708e-33	1.25156e-30	Up	ATPase AAA-type core domain containing protein.

## Sheet: Up-regulated DEGs in roots
Table S4. DEGs with expression not recovered after sulfate resupply: Up-regulagted DEGs in roots
Gene ID	CK_R_mean	S0_R_mean	log2(FC)	P_Value	FDR	Regulation Pattern	Annotation
Os09g0483400	12.9267	1630.93	6.9792	2.90795e-145	7.74194e-142	Up	Similar to Ubiquitin/ribosomal fusion protein (Fragment).
Os09g0341500	0.606667	45.2767	6.22172	2.09088e-123	3.33997e-120	Up	F-box domain cyclin-like domain containing protein.
Os07g0661000	6.30667	58.41	3.21127	1.36464e-78	1.06336e-75	Up	Adenosine/AMP deaminase domain containing protein.
MSTRG.20882	0.693333	40.8233	5.8797	8.65013e-71	5.52709e-68	Up	--
Os05g0469600	0.186667	6.8	5.187	6.77227e-65	3.73035e-62	Up	Similar to Pyruvate decarboxylase (Fragment).
Os04g0659200	4.3	46.98	3.44964	3.01716e-61	1.53003e-58	Up	Hypothetical protein.
Os07g0629500	0.14	13.7267	6.61541	1.01611e-60	5.07231e-58	Up	Similar to cDNA clone:002-114-B06 full insert sequence.
Os01g0373700	2.84667	102.123	5.1649	5.9997e-59	2.8188e-56	Up	Conserved hypothetical protein.
Os12g0455000	5.69	96.8167	4.08875	2.64019e-56	1.22245e-53	Up	Proteinase inhibitor I1 Kazal domain containing protein.
Os05g0456800	3.49333	40.4	3.53168	1.05445e-52	4.61472e-50	Up	Hypothetical gene.
MSTRG.33469	0.473333	17.0533	5.17105	1.84241e-52	7.95421e-50	Up	--
Os01g0369200	0.4	5.63333	3.81592	1.60358e-51	6.56809e-49	Up	Component of cullin-RING E3 ubiquitin ligase (CRL) complex Salt/drought stress response Cold stress response
Os03g0177400	868.093	3978.83	2.19642	2.04418e-48	7.86835e-46	Up	EF-1 alpha.
Os06g0559400	0.623333	24.3933	5.29034	6.01086e-48	2.28613e-45	Up	Conserved hypothetical protein.
Os06g0147300	4.50667	82.3833	4.19222	1.72828e-47	6.27443e-45	Up	Similar to cDNA clone:J023088C01 full insert sequence.
Os12g0639500	24.5967	298.48	3.6011	1.97968e-47	7.10638e-45	Up	ATPase AAA-type core domain containing protein.
MSTRG.23192	0.09	9.72667	6.75588	7.94704e-47	2.67255e-44	Up	--
Os03g0790500	6.24667	177.97	4.8324	1.03329e-46	3.43871e-44	Up	Alpha/beta hydrolase fold-3 domain containing protein.
MSTRG.33177	0.24	7.25667	4.9182	2.24224e-46	7.38507e-44	Up	--
Os01g0802700	2.21667	16.2767	2.87634	4.39897e-44	1.36445e-41	Up	Auxin efflux carrier domain containing protein.
Os02g0533800	20.6267	181.56	3.13786	4.97618e-43	1.47203e-40	Up	Similar to ATPase inhibitor.
Os01g0760000	5.66	155.997	4.78457	8.88022e-43	2.5865e-40	Up	Similar to Dynein light chain.
Os10g0345100	11.5367	64.4933	2.48292	1.3091e-41	3.57463e-39	Up	Multi antimicrobial extrusion protein MatE family protein.
Os02g0215200	10.5533	49.06	2.21685	1.38455e-41	3.74862e-39	Up	Class-I type histone deacetylase Vegetative growth
Os09g0498500	4.75333	122.3	4.68534	4.51797e-40	1.18312e-37	Up	NAD-binding site containing protein.
Os08g0188900	1.31	59.7333	5.5109	7.73592e-40	1.99312e-37	Up	Germin-like protein 8-1 Disease resistance
Os03g0338000	28.1933	271.837	3.26931	2.56313e-39	6.39741e-37	Up	Similar to alanine--glyoxylate aminotransferase 2.
Os12g0488900	1.62333	16.4967	3.34514	3.2539e-39	8.05858e-37	Up	Armadillo-like helical domain containing protein.
Os08g0404900	1.37	18.7867	3.77746	9.40849e-39	2.27714e-36	Up	Hypothetical conserved gene.
Os02g0214900	1.94	11.5233	2.57043	7.58489e-38	1.75596e-35	Up	Class-I type histone deacetylase Reproductive development Seed morphology
Os03g0295866	0.35	5.03667	3.84704	1.49749e-37	3.44185e-35	Up	Transcription factor IIS N-terminal domain containing protein.
Os05g0241100	1.5	17.56	3.54926	2.05968e-37	4.7002e-35	Up	Similar to predicted protein.
Os12g0161500	0.94	13.1533	3.80662	8.31565e-37	1.85782e-34	Up	Conserved hypothetical protein.
Os08g0368000	1.68	10.2567	2.61003	1.03165e-36	2.28884e-34	Up	Similar to Coatomer delta subunit (Delta-coat protein) (Delta-COP).
Os05g0194500	5.47667	34.74	2.66523	5.07706e-36	1.10341e-33	Up	Similar to ANAC075.
Os06g0142200	2.67333	94.7567	5.14752	2.41958e-35	5.15338e-33	Up	Early nodulin.
Os04g0614500	0.316667	9.29333	4.87516	4.50514e-35	9.46909e-33	Up	Pyridoxal phosphate-dependent transferase major region subdomain 1 domain containing protein.
Os01g0590200	20.3733	67.8867	1.73645	9.22917e-34	1.83139e-31	Up	Conserved hypothetical protein.
Os11g0514500	26.53	172.927	2.70446	3.85507e-33	7.41939e-31	Up	Sorghum bicolor leucine-rich repeat-containing extracellular glycoprotein precursor.
Os01g0881900	25.75	138.89	2.4313	5.97988e-33	1.13565e-30	Up	Leucine-rich repeat cysteine-containing containing protein.
Os03g0177500	511.74	1711.71	1.74196	6.00739e-33	1.13565e-30	Up	EF-1 alpha.
Os05g0469800	1.08	14.5	3.74695	8.22613e-33	1.53689e-30	Up	Pyruvate decarboxylase (EC 4.1.1.1) (Fragment).
Os06g0592500	11.1633	805.967	6.17388	1.39375e-32	2.55905e-30	Up	Similar to Ethylene-responsive transcriptional coactivator.
Os05g0142600	5.67667	111.43	4.29495	2.76178e-32	4.98493e-30	Up	Conserved hypothetical protein.
Os05g0550600	0.783333	30.69	5.292	3.51441e-32	6.30777e-30	Up	Similar to Nonspecific lipid-transfer protein 2 (nsLTP2) (7 kDa lipid transfer protein).
Os08g0499400	0.696667	6.63667	3.25192	1.09191e-31	1.91673e-29	Up	Conserved hypothetical protein.
Os08g0549900	0.403333	7.6	4.23595	4.51166e-31	7.74939e-29	Up	Conserved hypothetical protein.
Os04g0339400	3.85	85.51	4.47316	6.27624e-31	1.06092e-28	Up	Aldo/keto reductase family protein.
Os06g0136600	14.0567	74.3867	2.40379	7.19445e-31	1.20973e-28	Up	Similar to Enolase 1 (EC 4.2.1.11) (2-phosphoglycerate dehydratase 1) (2-phospho- D-glycerate hydro-lyase 1).
Os08g0538600	60.0167	229.28	1.93368	8.52128e-31	1.42533e-28	Up	Stress up-regulated Nod 19 family protein.
Os03g0828300	0.75	11.3433	3.91881	1.18898e-30	1.97842e-28	Up	Similar to (1-4)-beta-mannan endohydrolase-like protein.
Os02g0584800	16.95	98.8767	2.54434	1.25949e-30	2.08488e-28	Up	Heavy metal transport/detoxification protein domain containing protein.
Os03g0734300	78.9933	1071.78	3.76213	2.50512e-30	4.10428e-28	Up	Similar to Proteinase inhibitor type II CEVI57 precursor.
Os03g0184100	0.946667	7.90667	3.06214	4.0853e-30	6.59178e-28	Up	Conserved hypothetical protein.
Os01g0627500	28.8767	118.603	2.03817	5.74977e-30	9.13898e-28	Up	Cytochrome P450 family protein.
Os03g0702100	4.21667	22.9067	2.44159	1.11885e-29	1.76084e-27	Up	Hypothetical protein.
Os03g0826800	13.6167	87.62	2.68589	1.44182e-29	2.24699e-27	Up	Conserved hypothetical protein.
Os07g0602000	0.49	43.1933	6.46188	1.52809e-29	2.35843e-27	Up	Similar to NADPH HC toxin reductase (Fragment).
Os01g0740700	1.03333	13.5933	3.71752	1.34227e-28	2.00387e-26	Up	Hypothetical protein.
Os02g0743800	0.57	8.09333	3.8277	2.68469e-28	3.95255e-26	Up	Hypothetical conserved gene.
Os03g0240600	1.25667	9.47333	2.91427	4.23252e-28	6.0637e-26	Up	U-box containing E3 ligase Response to phosphate starvation
Os03g0234500	4.19	30.1133	2.84538	4.87026e-28	6.91533e-26	Up	Haem peroxidase plant/fungal/bacterial family protein.
MSTRG.33466	2.09667	10.0233	2.25719	5.90613e-28	8.31927e-26	Up	PREDICTED: calponin homology domain-containing protein DDB_G0272472 [Oryza sativa Japonica Group]
Os03g0159900	11.4167	60.68	2.41008	7.65755e-28	1.06831e-25	Up	Hypothetical conserved gene.
Os12g0162800	3.35667	20.5833	2.61638	8.2871e-28	1.15111e-25	Up	Domain of unknown function DUF1618 domain containing protein.
Os07g0604300	1.33	9.09667	2.77391	1.05934e-27	1.45252e-25	Up	Similar to Phytochelatin synthetase (Fragment).
Os02g0539200	1.74	9.6	2.46395	2.67516e-27	3.48841e-25	Up	Zinc finger RING/FYVE/PHD-type domain containing protein.
Os02g0593700	238.767	750.037	1.65136	3.03152e-27	3.92109e-25	Up	Similar to TA4 protein (Fragment).
Os01g0318202	1.04667	8.09	2.95034	5.58844e-27	7.0849e-25	Up	Hypothetical gene.
Os04g0269600	17.9167	59.24	1.72527	5.80182e-27	7.32635e-25	Up	Similar to Primary amine oxidase.
MSTRG.9693	0.283333	5.45	4.26568	5.83017e-27	7.33317e-25	Up	--
Os01g0313300	2.01	18.3333	3.1892	7.97867e-27	9.91839e-25	Up	Similar to EREBP-3 protein (Fragment).
MSTRG.28235	0.396667	13.69	5.10905	1.00502e-26	1.23494e-24	Up	--
Os12g0154700	18.82	159.72	3.08521	1.14096e-26	1.39128e-24	Up	Germin-like protein 12-1 Disease resistance
Os12g0639400	1.20333	9.28667	2.94812	1.51097e-26	1.8285e-24	Up	ATPase AAA-type core domain containing protein.
Os03g0340500	15.2933	56.05	1.87381	2.0818e-26	2.50036e-24	Up	Similar to Sucrose synthase (EC 2.4.1.13).
Os03g0196600	1.60333	15.1767	3.24271	2.24407e-26	2.67513e-24	Up	Similar to satase isoform II.
Os02g0594800	2.44667	13.53	2.46727	2.381e-26	2.81734e-24	Up	No apical meristem (NAM) protein domain containing protein.
Os09g0341600	1.71333	19.3967	3.50093	4.25834e-26	4.94711e-24	Up	Cyclin-like F-box domain containing protein.
Os06g0636100	1.09667	7.5	2.77377	5.06832e-26	5.84559e-24	Up	Hypothetical conserved gene.
Os02g0462800	0.12	4.61667	5.26575	5.36608e-26	6.14464e-24	Up	WRKY transcription factor 42 Transcriptional repressor Promotion of leaf senescence
Os05g0580500	1.33667	7.52	2.49209	6.32573e-26	7.16647e-24	Up	Similar to 10A19I.14.
Os03g0432100	2.68	27.57	3.36279	6.80139e-26	7.66512e-24	Up	Similar to Pyruvate phosphate dikinase 2.
Os03g0841600	7.25	36.94	2.34913	1.27159e-25	1.41058e-23	Up	UDP-glucuronosyl/UDP-glucosyltransferase family protein.
Os01g0839100	6.41333	35.7067	2.47705	4.87834e-25	5.22997e-23	Up	Zinc finger C2H2 domain containing protein.
MSTRG.31561	1.66	35.2567	4.40864	4.92511e-25	5.26019e-23	Up	--
Os12g0138900	26.3267	79.23	1.58952	8.14927e-25	8.53616e-23	Up	Isopropylmalate synthase Regulation of seed vigour
Os07g0613000	7.30667	43.13	2.56141	9.64805e-25	1.00403e-22	Up	RelA/SpoT protein domain containing protein.
Os02g0802500	33.7733	148.117	2.13278	1.4486e-24	1.50259e-22	Up	Similar to H(+)-translocating (Pyrophosphate-ENERGIZED) inorganic pyrophosphatase beta-1 polypeptide (EC 3.6.1.1) (Fragment).
Os01g0558700	6.55333	36.8267	2.49045	1.71965e-24	1.77798e-22	Up	Conserved hypothetical protein.
Os11g0142500	34.2967	93.6767	1.44962	2.12445e-24	2.17539e-22	Up	Isopropylmalate synthase Regulation of seed vigour
Os01g0187900	5.73333	27.0667	2.23907	2.18644e-24	2.2317e-22	Up	Similar to Transcription factor MYBS2.
Os11g0592100	143.753	1310.29	3.18822	2.76099e-24	2.80918e-22	Up	Similar to Barwin.
Os04g0127800	0.0433333	1.93	5.47698	4.81265e-24	4.8503e-22	Up	Coactivator CBP KIX domain containing protein.
Os09g0549300	0.9	5.69333	2.66128	5.07957e-24	5.08721e-22	Up	Flavin-containing monooxygenase FMO family protein.
Os09g0567000	26.7867	74.8533	1.48255	8.41476e-24	8.29737e-22	Up	Domain of unknown function DUF1618 domain containing protein.
Os07g0241700	1.54	17.2467	3.48532	8.5396e-24	8.39456e-22	Up	Similar to Cytokinin-N-glucosyltransferase 1.
Os09g0482800	1.64333	17.9767	3.45143	9.04898e-24	8.868e-22	Up	EF hand domain containing protein.
Os11g0127600	4.06667	23.4667	2.52869	1.02384e-23	9.97248e-22	Up	No apical meristem (NAM) protein domain containing protein.
Os09g0471000	0.263333	3.84333	3.8674	1.28892e-23	1.24684e-21	Up	Similar to cupin RmlC-type.
Os03g0177966	11.39	33.8167	1.56997	1.38652e-23	1.33423e-21	Up	Hypothetical gene.
Os09g0547800	0.786667	4.35667	2.4694	1.59381e-23	1.52452e-21	Up	Cyclin-like F-box domain containing protein.
MSTRG.9810	0.21	2.67667	3.67198	1.88688e-23	1.78879e-21	Up	BKRF1 encodes EBNA-1 protein-like [Oryza sativa Japonica Group]
Os07g0127700	6.42	98.3167	3.93679	2.2678e-23	2.13721e-21	Up	Similar to Pathogenesis-related protein class 1.
Os11g0641500	8.58333	48.4333	2.49639	6.7006e-23	6.18701e-21	Up	Cupredoxin domain containing protein.
Os02g0232900	3.80333	40.6633	3.41839	8.01733e-23	7.33919e-21	Up	A member of the Nodulin26-like Intrinsic Protein (NIP) family Arsenite transporter
Os04g0269800	4.63667	21.6	2.21987	8.076e-23	7.37178e-21	Up	Conserved hypothetical protein.
Os08g0189100	1.51333	38.2967	4.66142	1.22248e-22	1.1064e-20	Up	Germin-like protein 8-2 Disease resistance
Os04g0370500	4.04	16.1433	1.99851	1.2382e-22	1.11118e-20	Up	Similar to OSIGBa0107E14.10 protein.
Os02g0782500	1.37333	15	3.44921	1.41252e-22	1.25353e-20	Up	Similar to Small heat stress protein class CIII.
Os09g0436500	92.0867	343.367	1.89869	1.6589e-22	1.46405e-20	Up	Conserved hypothetical protein.
Os03g0852800	2.74	15.9833	2.54432	2.02535e-22	1.77763e-20	Up	Similar to NPC4 (NONSPECIFIC PHOSPHOLIPASE C4)%3B hydrolase acting on ester bonds / phospholipase C.
Os04g0635100	5.08667	68.58	3.753	2.37419e-22	2.06677e-20	Up	Similar to H0315F07.12 protein.
Os04g0600200	49.49	182.303	1.88113	3.17619e-22	2.73512e-20	Up	Homodimeric diiron-carboxylate protein Cyanide-resistant respiration in mitochondria Reactive oxygen species (ROS) scavenging
Os12g0154800	9.62	88.2633	3.19771	3.83999e-22	3.29785e-20	Up	Germin-like protein 12-2 Disease resistance
Os03g0820300	2.62	19.0167	2.85963	4.22359e-22	3.60789e-20	Up	TFIIIA-type zinc finger protein Transcription activator Abiotic stress tolerance
Os08g0134900	16.71	47.7933	1.5161	9.71659e-22	8.1691e-20	Up	Conserved hypothetical protein.
Os11g0665600	20.2167	105.937	2.38958	1.79442e-21	1.47373e-19	Up	Helix-turn-helix Fis-type domain containing protein.
Os01g0601625	0.64	3.67	2.51964	1.83086e-21	1.4998e-19	Up	Leucine rich repeat N-terminal domain containing protein.
Os01g0960600	1.30333	7.79333	2.58003	1.86255e-21	1.52186e-19	Up	Hypothetical conserved gene.
Os12g0268100	8.41	36.58	2.12088	2.03663e-21	1.65985e-19	Up	Hypothetical protein.
Os10g0204400	1.59333	36.3667	4.5125	2.23208e-21	1.81452e-19	Up	Similar to Phosphoenolpyruvate carboxykinase (Fragment).
MSTRG.33077	0.353333	2.61	2.88495	2.28873e-21	1.85585e-19	Up	--
Os01g0873200	1.97667	12.8767	2.70362	2.67029e-21	2.14348e-19	Up	Similar to Amidophosphoribosyltransferase chloroplast precursor (EC 2.4.2.14) (Glutamine phosphoribosylpyrophosphate amidotransferase) (ATASE) (GPAT) (Fragment).
Os02g0737200	1.68333	27.56	4.03318	2.68267e-21	2.14802e-19	Up	Conserved hypothetical protein.
Os08g0133600	11.7067	32.8667	1.48929	2.95499e-21	2.34841e-19	Up	Conserved hypothetical protein.
Os05g0444200	4.50667	28.62	2.66689	3.53195e-21	2.78614e-19	Up	Similar to T6J4.5 protein (WIP6 protein).
Os04g0634900	0.433333	12.7967	4.88415	4.21438e-21	3.30813e-19	Up	Similar to H0315F07.9 protein.
Os01g0727700	7.11333	42.5467	2.58045	4.99429e-21	3.90116e-19	Up	Hypothetical conserved gene.
Os01g0154500	0.1	4.51	5.49506	5.34983e-21	4.15247e-19	Up	Protein of unknown function DUF674 domain containing protein.
Os01g0706600	18.0467	83.55	2.21091	5.7069e-21	4.41462e-19	Up	Conserved hypothetical protein.
Os06g0128700	5.06667	17.53	1.79072	6.10479e-21	4.69966e-19	Up	Ankyrin repeat domain containing protein.
Os05g0248200	0.0233333	10.6167	8.82972	6.76979e-21	5.19907e-19	Up	Glycoside hydrolase family 18 protein.
MSTRG.10499	0.796667	9.18333	3.52697	7.37581e-21	5.6509e-19	Up	Ulp1 protease-like protein [Oryza sativa Japonica Group]
Os07g0638100	60.19	403.817	2.7461	9.65691e-21	7.32824e-19	Up	Six-bladed beta-propeller TolB-like domain containing protein.
Os01g0498300	1.91667	10.6433	2.47328	1.19583e-20	9.05318e-19	Up	Glycosyltransferase AER61 uncharacterized domain containing protein.
Os08g0387050	0.163333	3.67667	4.49251	1.41752e-20	1.06558e-18	Up	Conserved hypothetical protein.
Os09g0486500	43.27	154.287	1.83417	1.67509e-20	1.25037e-18	Up	A20/AN1 zinc-finger protein Response to multiple biotic stresses Regulation of abiotic stress responses
Os12g0294100	6.82333	18.5133	1.44002	2.00744e-20	1.48115e-18	Up	WD40 repeat-like domain containing protein.
Os06g0249350	6.74	39.6067	2.55492	2.51623e-20	1.84801e-18	Up	Conserved hypothetical protein.
Os08g0508700	1.66	7.01333	2.07892	2.55601e-20	1.87292e-18	Up	Similar to EIL3.
Os12g0154900	10.4233	115.75	3.47312	2.58283e-20	1.88825e-18	Up	Germin-like protein 12-3 Disease resistance
Os10g0559800	3.09	12.4733	2.01317	3.36286e-20	2.4473e-18	Up	Protein of unknown function DUF547 domain containing protein.
MSTRG.15638	0.0933333	4.84	5.69647	3.3973e-20	2.46675e-18	Up	--
Os01g0880800	5.97333	39.73	2.73362	6.03643e-20	4.32403e-18	Up	Similar to Acyl-[acyl-carrier-protein] desaturase chloroplast precursor (EC 1.14.19.2) (Stearoyl-ACP desaturase).
Os12g0123800	3.36667	15.1367	2.16865	6.73632e-20	4.80384e-18	Up	No apical meristem (NAM) protein domain containing protein.
Os01g0863300	5.65	29.7767	2.39786	8.23458e-20	5.85921e-18	Up	Similar to MCB2 protein.
Os06g0687200	0.27	4.22333	3.96735	1.16017e-19	8.14616e-18	Up	Zinc finger RING/FYVE/PHD-type domain containing protein.
Os05g0315700	0.153333	8.42667	5.78022	1.2716e-19	8.909e-18	Up	Transferase domain containing protein.
Os05g0177000	2.11	8.13667	1.94719	1.45728e-19	1.01653e-17	Up	Cyclin-like F-box domain containing protein.
Os11g0210300	27.9567	140.973	2.33416	1.69157e-19	1.17483e-17	Up	Alcohol dehydrogenase 1.
Os03g0625800	1.79	7.43333	2.05405	1.81531e-19	1.25685e-17	Up	Zinc finger C6HC-type domain containing protein.
Os08g0189400	20.46	94.1367	2.20195	1.81753e-19	1.25685e-17	Up	Germin-like protein 8-5 Disease resistance
Os09g0381400	12.41	164.217	3.72603	1.9379e-19	1.33431e-17	Up	Similar to Ervatamin C (EC 3.4.22.-) (ERV-C).
Os04g0450000	5.21	32.42	2.63753	3.0194e-19	2.06561e-17	Up	Zinc finger FYVE/PHD-type domain containing protein.
Os07g0588000	59.82	144.907	1.27642	3.6132e-19	2.45605e-17	Up	Interferon-related developmental regulator domain containing protein.
Os01g0314000	0.56	4.02667	2.84609	3.64807e-19	2.47449e-17	Up	Protein of unknown function DUF3615 domain containing protein.
Os12g0631600	8.52	28.2833	1.73103	4.40666e-19	2.95765e-17	Up	Conserved hypothetical protein.
Os04g0578550	0.906667	7.51	3.05017	4.66445e-19	3.11106e-17	Up	Hypothetical conserved gene.
Os10g0407200	1.15333	7.48667	2.69851	6.24214e-19	4.06158e-17	Up	Protein of unknown function DUF962 family protein.
Os06g0146500	0.513333	5.39	3.39232	6.56081e-19	4.26026e-17	Up	Hypothetical conserved gene.
Os06g0134400	3.28667	11.22	1.77138	6.75284e-19	4.37606e-17	Up	Protein of unknown function DUF3615 domain containing protein.
Os11g0701500	0.93	25.2267	4.76158	1.29007e-18	8.25958e-17	Up	Similar to Class III chitinase homologue
Os02g0633200	9.19333	26.2467	1.51347	1.45888e-18	9.28451e-17	Up	Pentatricopeptide repeat domain containing protein.
Os09g0120033	0.456667	4.93333	3.43335	1.48296e-18	9.41898e-17	Up	Hypothetical protein.
MSTRG.22003	0.13	2.07	3.99305	2.45237e-18	1.53323e-16	Up	PREDICTED: G-type lectin S-receptor-like serine/threonine-protein kinase At1g34300 [Oryza sativa Japonica Group]
Os03g0655100	1.42333	8.90333	2.64507	2.80017e-18	1.73708e-16	Up	Similar to Cupin RmlC-type.
Os04g0659300	185.62	1304.66	2.81325	3.11171e-18	1.90812e-16	Up	Receptor-like protein Root development Salt stress response Regulation of iron acquisition
Os06g0650900	5.49333	33.63	2.614	3.32789e-18	2.029e-16	Up	Conserved hypothetical protein.
Os07g0151800	10.3667	58.3867	2.49369	3.74759e-18	2.26757e-16	Up	Conserved hypothetical protein.
Os12g0197100	1.19667	7.41	2.63045	4.33623e-18	2.61385e-16	Up	Pre-ATP-grasp fold domain containing protein.
Os01g0947000	163.03	764.653	2.22967	4.53111e-18	2.72105e-16	Up	Similar to Beta-1 3-glucanase precursor.
Os05g0490100	221.783	648.59	1.54816	4.77567e-18	2.86253e-16	Up	Similar to 60S ribosomal protein L30.
Os09g0526700	2.50333	25.8233	3.36675	4.93932e-18	2.95508e-16	Up	Similar to UDP-glucose 4-epimerase (EC 5.1.3.2) (Galactowaldenase) (UDP-galactose 4-epimerase).
Os01g0583300	0.53	3.64667	2.78251	7.22437e-18	4.29004e-16	Up	Zinc finger C2H2 LYAR-type domain containing protein.
Os09g0283600	1.79333	35.4633	4.30561	7.27524e-18	4.31223e-16	Up	Zinc finger C6HC-type domain containing protein.
MSTRG.19390	1.16667	8.64	2.88864	8.39215e-18	4.94672e-16	Up	--							j
Os08g0404500	4.71	29.4633	2.64512	9.96491e-18	5.80947e-16	Up	C1-like domain containing protein.
Os02g0584700	10.1467	35.93	1.82418	1.01775e-17	5.92258e-16	Up	Heavy metal transport/detoxification protein domain containing protein.
MSTRG.10340	0.0166667	3.24667	7.60585	1.05458e-17	6.12575e-16	Up	--
Os02g0282900	20.8633	75.23	1.85034	1.19104e-17	6.8809e-16	Up	Similar to 68 kDa protein HP68.
Os05g0367900	1.49	9.46667	2.66754	1.42947e-17	8.21381e-16	Up	Harpin-induced 1 domain containing protein.
Os09g0324200	0.176667	2.32333	3.71709	1.43254e-17	8.21424e-16	Up	Cyclin-like F-box domain containing protein.
Os07g0501100	0.001	5.93	12.5338	1.47545e-17	8.40242e-16	Up	Similar to Chalcone synthase 2 (EC 2.3.1.74) (Naringenin-chalcone synthase 2).
Os08g0140300	17.9367	75.5733	2.07497	1.82413e-17	1.03328e-15	Up	Aromatic L-amino acid decarboxylase (AADC) Senescence-induced serotonin biosynthesis
Os01g0812800	17.5267	57.8833	1.7236	1.97905e-17	1.11906e-15	Up	Ribosomal protein L30e domain containing protein.
Os10g0451700	0.001	6.43333	12.6514	2.01624e-17	1.13807e-15	Up	Hypothetical protein.
Os06g0600301	1.18	7.96333	2.75459	2.13764e-17	1.20081e-15	Up	Similar to GTP-binding nuclear protein Ran1B (Fragment).
Os04g0597600	2.23333	20.1167	3.17112	2.13866e-17	1.20081e-15	Up	TGF-beta receptor type I/II extracellular region family protein.
MSTRG.29076	1.52333	16.4867	3.436	2.22806e-17	1.24662e-15	Up	--
Os02g0804300	16.8567	42.9067	1.34788	2.3071e-17	1.28859e-15	Up	Methyltransferase type 11 domain containing protein.
Os06g0548200	3.85333	16.4433	2.09332	2.86379e-17	1.58018e-15	Up	FAD linked oxidase N-terminal domain containing protein.
Os02g0162500	311.15	758.947	1.28639	3.19639e-17	1.75461e-15	Up	Similar to 40S ribosomal protein S14.
Os02g0561800	0.903333	6.93667	2.94091	3.64914e-17	1.98947e-15	Up	RING-H2 type E3 ubiquitin ligase Root development Maintenance of cell viability after the initiation of root primordial formation Defense response
Os06g0134500	2.29333	8.21	1.83994	4.01942e-17	2.18389e-15	Up	Protein of unknown function DUF3615 domain containing protein.
Os03g0595600	0.613333	12.93	4.39791	4.4799e-17	2.42583e-15	Up	Similar to Glutathione S-transferase N-terminal domain containing protein expressed.
Os08g0448100	4.29333	16.9633	1.98225	4.72903e-17	2.5564e-15	Up	Conserved hypothetical protein.
Os04g0677500	57.3	133.09	1.2158	6.26831e-17	3.37138e-15	Up	Pyruvate kinase (EC 2.7.1.40).
Os03g0735100	22.5633	59.11	1.38942	7.04273e-17	3.77519e-15	Up	Quinoprotein amine dehydrogenase beta chain-like domain containing protein.
Os08g0150800	17.12	38.7067	1.1769	8.48673e-17	4.54161e-15	Up	Similar to Tyrosyl-tRNA synthetase (Tyrosyl-tRNA ligase%3B TyrRS). class-I aaRS.
Os01g0939300	1.09333	6.19667	2.50276	8.69715e-17	4.64643e-15	Up	BRCT domain containing protein.
Os03g0277300	2.01667	9.82667	2.28473	9.95816e-17	5.28477e-15	Up	Heat shock protein 70.
Os11g0605500	35.3667	157.39	2.15388	1.00564e-16	5.32808e-15	Up	Acyl-CoA oxidase.
Os05g0531000	2.19333	12.6267	2.52528	1.0147e-16	5.3583e-15	Up	Protein of unknown function DUF584 family protein.
Os12g0625000	190.373	500.383	1.3942	1.09027e-16	5.73838e-15	Up	Similar to Cysteine synthase.
Os05g0438800	33.9767	102.03	1.58638	1.13238e-16	5.95019e-15	Up	Similar to Actin 1.
Os08g0543400	21.67	56.62	1.38561	1.15612e-16	6.05505e-15	Up	Transferase family protein.
Os03g0178000	573.527	1471.38	1.35924	1.18426e-16	6.19226e-15	Up	EF-1 alpha.
Os07g0110200	32.1167	81.8133	1.34901	1.40338e-16	7.2903e-15	Up	Similar to GTP-binding protein-related.
Os04g0550700	41.8433	112.093	1.42163	1.88964e-16	9.73715e-15	Up	Uncharacterised conserved protein UCP012943 domain containing protein.
Os12g0151000	2.93	20.8733	2.83269	2.05034e-16	1.04975e-14	Up	Similar to Purple acid phosphatase.
Os10g0116800	0.45	3.56	2.98388	2.13368e-16	1.09067e-14	Up	Similar to Purple acid phosphatase.
Os02g0686700	4.42	20.6467	2.22379	2.14215e-16	1.09325e-14	Up	Protein of unknown function DUF581 family protein.
Os02g0559800	0.616667	4.72333	2.93724	2.63508e-16	1.3384e-14	Up	RING-H2 type E3 ubiquitin ligase Root development Maintenance of cell viability after the initiation of root primordial formation Defense response
Os12g0245100	11.3267	31.83	1.49066	2.74505e-16	1.38545e-14	Up	Conserved hypothetical protein.
Os07g0421300	20.4533	46.37	1.18086	3.24994e-16	1.62997e-14	Up	Similar to Alpha glucosidase-like protein.
Os05g0247800	0.496667	173.66	8.44977	3.9479e-16	1.95546e-14	Up	Glycoside hydrolase family 18 protein.
Os06g0152400	2.30333	10.25	2.15383	4.31666e-16	2.13481e-14	Up	Similar to Hexaprenyldihydroxybenzoate methyltransferase mitochondrial precursor (EC 2.1.1.114) (Dihydroxyhexaprenylbenzoate methyltransferase) (3 4- dihydroxy-5-hexaprenylbenzoate methyltransferase) (DHHB methyltransferase) (DHHB-MT) (DHHB-MTase).
Os07g0671800	304.457	809.64	1.41104	4.38461e-16	2.16172e-14	Up	Similar to Stress-related protein-like protein (Fragment).
Os03g0643300	9.81	25.2533	1.36415	5.0071e-16	2.45348e-14	Up	Ornithine delta-aminotransferase Abiotic stress tolerance
Os07g0688500	2.12333	6.21	1.54826	6.04331e-16	2.95217e-14	Up	Similar to Poly.
Os05g0545400	2.6	11.43	2.13624	6.8053e-16	3.30922e-14	Up	Serine/threonine protein kinase domain containing protein.
Os12g0125000	0.59	4.11	2.80035	7.44606e-16	3.60435e-14	Up	R2R3 MYB transcription factor Leaf development
Os12g0448900	28.18	133.583	2.245	8.25467e-16	3.97169e-14	Up	Fatty acid alpha-dioxygenase family Enzyme that oxygenates fatty acids into 2R-hydroperoxides
Os03g0334000	33.6	68.7633	1.03318	8.71475e-16	4.18675e-14	Up	Similar to Ribosomal protein S6 kinase.
Os01g0185200	74.6833	183.983	1.30072	1.04759e-15	4.98041e-14	Up	Similar to glutaminyl-tRNA synthetase.
Os02g0332450	0.0766667	1.50333	4.29342	1.0691e-15	5.07512e-14	Up	Hypothetical conserved gene.
Os07g0573300	24.5267	52.9833	1.11119	1.22313e-15	5.78913e-14	Up	FYVE finger-containing phosphoinositide kinase (EC 2.7.1.68) (1- phosphatidylinositol-4-phosphate 5-kinase) (PIP5K) (PtdIns(4)P-5- kinase) (PIKfyve) (p235). Splice isoform p235S.
Os04g0458600	1.97667	37.2933	4.23778	1.29993e-15	6.11637e-14	Up	Similar to ORW1943Ba0077G13.3 protein.
Os02g0774200	25.9733	169.86	2.70924	1.38081e-15	6.45888e-14	Up	Conserved hypothetical protein.
Os04g0635500	5.79333	57.2233	3.30414	1.46612e-15	6.84791e-14	Up	Similar to Wound induced protein (Fragment).
Os02g0585100	13.1	76.2867	2.54186	1.47756e-15	6.88119e-14	Up	Similar to ATFP4.
Os12g0636700	1.82	11.31	2.63559	1.52333e-15	7.08405e-14	Up	Conserved hypothetical protein.
Os03g0211400	3.12	9.02333	1.53211	1.75836e-15	8.11427e-14	Up	Calmodulin-binding plant family protein.
Os03g0148000	2.66667	8.66667	1.70044	1.76011e-15	8.11427e-14	Up	Protein of unknown function DUF677 family protein.
Os03g0176100	0.27	3.38	3.64599	1.8617e-15	8.54562e-14	Up	Similar to predicted protein.
Os01g0793800	7.79	40.1533	2.36582	1.86803e-15	8.56237e-14	Up	Conserved hypothetical protein.
Os01g0588400	8.72333	31.17	1.83721	1.89416e-15	8.66971e-14	Up	Band 7 protein family protein.
Os01g0943900	24.8	59.2567	1.25664	2.19983e-15	1.00114e-13	Up	Hypothetical conserved gene.
Os10g0475900	2.47667	8.43	1.76713	2.27665e-15	1.03316e-13	Up	Ubiquitin domain containing protein.
Os08g0137900	9.97333	58.1433	2.54347	2.90877e-15	1.30886e-13	Up	Similar to Chemocyanin precursor (Basic blue protein) (Plantacyanin).
Os01g0585100	21.56	60.0833	1.47861	3.08329e-15	1.38349e-13	Up	Similar to Integral membrane protein.
Os07g0611600	8.76667	24.1167	1.45993	3.31478e-15	1.4832e-13	Up	DNA-directed RNA polymerase III subunit Rpc31 domain containing protein.
Os09g0364400	5.89333	52.4767	3.15452	3.59839e-15	1.60785e-13	Up	Conserved hypothetical protein.
Os03g0702000	6.51667	30.4	2.22187	3.92023e-15	1.73949e-13	Up	UDP-glucuronosyl/UDP-glucosyltransferase family protein.
Os01g0100700	168.86	388.82	1.20327	4.52564e-15	1.99428e-13	Up	Similar to 40S ribosomal protein S5-1.
Os07g0242600	4.56	13.3367	1.54829	4.66129e-15	2.0484e-13	Up	Cyclin-like F-box domain containing protein.
Os11g0465200	1.00667	5.52	2.45508	4.70144e-15	2.06321e-13	Up	Similar to Bx2-like protein.
Os07g0529000	0.16	83.5867	9.02906	4.74206e-15	2.07818e-13	Up	Similar to Isocitrate lyase (Fragment).
Os05g0151000	0.0266667	0.536667	4.33092	5.98265e-15	2.59692e-13	Up	Similar to DNA-directed RNA polymerase.
Os11g0634500	148.153	369.403	1.31811	6.05231e-15	2.6236e-13	Up	40S ribosomal protein S29.
Os12g0496700	0.0266667	2.09333	6.29462	8.26566e-15	3.54458e-13	Up	Similar to F-box domain containing protein expressed.
MSTRG.21061	0.01	0.786667	6.29768	8.29682e-15	3.55317e-13	Up	far-red impaired response-like [Oryza sativa Japonica Group]
Os05g0404700	0.976667	9.08667	3.21781	9.19843e-15	3.90268e-13	Up	Similar to MBD1.
Os01g0740600	11.1567	39.59	1.82723	1.00328e-14	4.22861e-13	Up	Transferrin receptor-like dimerisation domain containing protein.
Os07g0624900	0.28	5.35	4.25604	1.02425e-14	4.31131e-13	Up	SKP1.
Os01g0511000	26.75	96.0867	1.8448	1.07937e-14	4.53053e-13	Up	Similar to LOB domain protein 40.
Os01g0283300	17.8467	68.85	1.9478	1.11014e-14	4.64832e-13	Up	Conserved hypothetical protein.
Os01g0855600	33.89	100.663	1.57061	1.153e-14	4.82148e-13	Up	Similar to Hs1pro-1 protein.
MSTRG.16386	0.303333	3.49333	3.52563	1.20938e-14	5.04808e-13	Up	--
Os04g0370600	2.48	8.49333	1.77599	1.21035e-14	5.04808e-13	Up	Leucine-rich repeat cysteine-containing subtype domain containing protein.
Os04g0398000	3.34333	15.58	2.22034	1.36065e-14	5.63812e-13	Up	ERF transcription factor A member of APETALA2/Ethylene-Responsive Element Binding Protein(AP2/EREBP) family Regulation of drought stress response Innate immunity
Os05g0145700	2.91333	8.67333	1.57392	1.37118e-14	5.6744e-13	Up	Peptidase trypsin-like serine and cysteine domain containing protein.
Os04g0685700	10.4433	41.9833	2.00723	1.40044e-14	5.78052e-13	Up	Similar to H0723C07.4 protein.
Os08g0412800	1.42667	7.49	2.39232	1.493e-14	6.13878e-13	Up	Protein of unknown function DUF1262 family protein.
Os06g0536100	0.613333	4.46667	2.86446	1.51195e-14	6.20072e-13	Up	Hypothetical conserved gene.
Os12g0516900	0.24	1.5	2.64386	1.55806e-14	6.38166e-13	Up	Cyclin-like F-box domain containing protein.
Os03g0766600	1.13	19.98	4.14416	1.71228e-14	6.98646e-13	Up	Conserved hypothetical protein.
Os04g0477300	6.85333	17.47	1.35	1.7165e-14	6.9869e-13	Up	Similar to OSIGBa0116M22.6 protein.
Os07g0683200	24.1933	110.4	2.19006	1.71676e-14	6.9869e-13	Up	Similar to NAC domain transcription factor.
Os12g0607000	28.85	95.5533	1.72773	1.87071e-14	7.57483e-13	Up	Similar to homocysteine S-methyltransferase-2.
MSTRG.11862	10.1467	59.6467	2.55544	2.04634e-14	8.23402e-13	Up	--
Os11g0134500	15.75	42.82	1.44293	2.04639e-14	8.23402e-13	Up	WD40 repeat-like domain containing protein.
Os03g0207400	4.30667	18.51	2.10366	2.0612e-14	8.28316e-13	Up	Similar to Protein phosphatase 2C-like.
Os07g0550600	0.36	2.94333	3.03138	2.28824e-14	9.1495e-13	Up	Transferase family protein.
Os06g0589700	0.22	3.15	3.83978	2.62841e-14	1.04704e-12	Up	Similar to Poly(A)-binding protein (Fragment).
Os11g0671950	3.88	19.73	2.34626	2.66563e-14	1.06054e-12	Up	Similar to Protein kinase domain containing protein expressed.
Os10g0464500	1.90667	9.36	2.29546	2.74483e-14	1.08799e-12	Up	Zinc finger RING-type domain containing protein.
Os05g0177400	0.336667	2.75333	3.03179	2.93989e-14	1.16099e-12	Up	Hypothetical conserved gene.
Os04g0142400	9.53333	28.8267	1.59635	3.25584e-14	1.27943e-12	Up	Conserved hypothetical protein.
Os01g0942300	4.27333	22.57	2.40097	3.46684e-14	1.35734e-12	Up	Similar to Beta glucanase precursor (EC 3.2.1.73) (Fragment).
Os06g0134466	1.55667	8.04667	2.36993	3.64404e-14	1.42497e-12	Up	Hypothetical conserved gene.
Os03g0721900	13.7133	70.6767	2.36565	4.45697e-14	1.72596e-12	Up	Similar to Histone H2A.
Os01g0524251	0.19	2.67	3.81277	4.56705e-14	1.7643e-12	Up	Conserved hypothetical protein.
Os11g0549605	0.506667	3.33333	2.71786	4.65627e-14	1.7966e-12	Up	Domain of unknown function DUF629 domain containing protein.
Os04g0359700	6.08333	25.5467	2.0702	4.70401e-14	1.80847e-12	Up	Hypothetical conserved gene.
Os01g0586800	2.98	26.0133	3.12587	4.73702e-14	1.81582e-12	Up	Similar to WRKY transcription factor 5 (Fragment).
Os04g0624000	81.1833	194.557	1.26093	4.74018e-14	1.81582e-12	Up	Similar to Symbiosis-related like protein.
Os01g0124600	0.833333	7.01667	3.07382	5.26773e-14	2.01308e-12	Up	Similar to cDNA clone:001-125-E08 full insert sequence.
Os03g0105300	17.3767	35.0567	1.01254	5.36153e-14	2.04648e-12	Up	Protein of unknown function DUF1677 Oryza sativa domain containing protein.
Os09g0419500	0.57	4.05333	2.83007	5.53746e-14	2.10962e-12	Up	Similar to ubiquitin-protein ligase/ zinc ion binding protein.
Os05g0454500	76.85	304.623	1.98691	5.54677e-14	2.10962e-12	Up	Conserved hypothetical protein.
Os01g0943000	27.23	64.58	1.24589	5.58633e-14	2.11962e-12	Up	Hypothetical conserved gene.
Os08g0529100	10.96	39.9633	1.86643	5.88514e-14	2.22244e-12	Up	Similar to Proteasome subunit beta type 1 (EC 3.4.25.1) (20S proteasome alpha subunit F) (20S proteasome subunit beta-6).
Os12g0268000	24.8233	81.08	1.70765	5.9186e-14	2.23036e-12	Up	Similar to Cytochrome P450 71A1 (EC 1.14.-.-) (CYPLXXIA1) (ARP-2).
Os11g0147150	3.44333	35.9433	3.38385	6.02668e-14	2.26785e-12	Up	Hypothetical gene.
Os06g0549900	35.4767	219.3	2.62796	6.60264e-14	2.46715e-12	Up	FAD linked oxidase N-terminal domain containing protein.
Os07g0673100	119.097	244.423	1.03725	7.14054e-14	2.65881e-12	Up	Ribosomal protein S8e domain containing protein.
Os09g0442100	4.99667	19.52	1.96592	7.50286e-14	2.78723e-12	Up	Protein kinase core domain containing protein.
Os05g0147800	0.47	2.69667	2.52044	7.933e-14	2.9436e-12	Up	Conserved hypothetical protein.
Os01g0672700	14.27	31.0333	1.12083	7.94238e-14	2.94366e-12	Up	Hypothetical conserved gene.
Os08g0459100	2.35333	7.79667	1.72815	8.76732e-14	3.23066e-12	Up	Leucine-rich repeat cysteine-containing containing protein.
Os05g0554500	12.5633	34.13	1.44182	9.33304e-14	3.43516e-12	Up	Conserved hypothetical protein.
Os07g0256200	1.68333	6.01	1.83604	1.03127e-13	3.76967e-12	Up	RNA recognition motif RNP-1 domain containing protein.
Os01g0138800	13.7233	77.15	2.49104	1.06528e-13	3.88512e-12	Up	Peptidase C26 domain containing protein.
Os04g0507400	0.36	3.24333	3.17141	1.06937e-13	3.89556e-12	Up	Similar to OSIGBa0157A06.5 protein.
MSTRG.33961	12.37	26.51	1.09969	1.15278e-13	4.17089e-12	Up	--
Os07g0631300	19.93	70.6433	1.82561	1.21932e-13	4.40665e-12	Up	Conserved hypothetical protein.
Os08g0539200	0.413333	4.67	3.49804	1.30208e-13	4.67927e-12	Up	Conserved hypothetical protein.
Os10g0451900	0.0866667	2.36	4.76717	1.59453e-13	5.68549e-12	Up	Peptidase S8 and S53 subtilisin kexin sedolisin domain containing protein.
Os11g0146100	0.563333	2.82	2.32363	1.65454e-13	5.89289e-12	Up	Similar to AtPIP5K1.
Os03g0277700	12.0633	60.43	2.32464	1.6613e-13	5.91039e-12	Up	Protein of unknown function DUF26 domain containing protein.
Os01g0261200	40.83	136.63	1.74257	1.80682e-13	6.39958e-12	Up	No apical meristem (NAM) protein domain containing protein.
Os01g0342500	0.466667	6.92667	3.8917	1.85385e-13	6.55165e-12	Up	Hypothetical conserved gene.
Os07g0633300	0.32	2.54667	2.99247	1.85791e-13	6.55874e-12	Up	Hypothetical conserved gene.
Os05g0465000	2.18333	10.22	2.22679	1.99063e-13	7.00404e-12	Up	Conserved hypothetical protein.
Os02g0464550	0.001	3.71	11.8572	2.05539e-13	7.21409e-12	Up	Hypothetical protein.
Os02g0114700	20.03	40.1633	1.00372	2.07621e-13	7.27312e-12	Up	Similar to Phosphorylation regulatory protein HP-10.
Os05g0511000	28.4233	70.04	1.3011	2.21449e-13	7.73208e-12	Up	TRAM LAG1 and CLN8 homology domain containing protein.
Os02g0671800	4.35667	26.6267	2.61158	2.47748e-13	8.58464e-12	Up	Integrase catalytic core domain containing protein.
Os01g0950000	2.85333	10.9033	1.93405	2.67238e-13	9.22997e-12	Up	Similar to Glutathione S-transferase GST 28 (EC 2.5.1.18) (Fragment).
Os01g0826000	4.17333	20.4567	2.2933	2.72365e-13	9.37662e-12	Up	Heavy metal transport/detoxification protein domain containing protein.
Os07g0593400	0.556667	3.81	2.77491	2.866e-13	9.84546e-12	Up	Similar to golgi transport 1 protein B.
Os01g0864500	18.7833	83.22	2.14748	2.99924e-13	1.02811e-11	Up	Harpin-induced 1 domain containing protein.
Os09g0541000	0.0966667	4.37333	5.49957	3.02481e-13	1.03576e-11	Up	Similar to Aquaporin 2.
Os06g0141600	0.001	3.19	11.6393	3.03464e-13	1.03802e-11	Up	Early nodulin 93 ENOD93 protein family protein.
Os01g0949900	17.4133	54.6167	1.64915	3.32143e-13	1.13127e-11	Up	Conserved hypothetical protein.
Os08g0480400	0.46	2.89333	2.65303	3.51117e-13	1.19081e-11	Up	Similar to cupin RmlC-type.
Os07g0209700	0.906667	5.70333	2.65316	3.70276e-13	1.25446e-11	Up	Protein of unknown function DUF1677 Oryza sativa domain containing protein.
Os05g0412800	7.22667	21.1767	1.55107	3.76608e-13	1.27321e-11	Up	Similar to Glutathione S-transferase GST 41 (EC 2.5.1.18).
Os04g0486300	0.523333	2.57333	2.29784	3.93408e-13	1.32861e-11	Up	Protein of unknown function DUF295 family protein.
Os03g0777000	3.09333	11.7667	1.92747	3.99895e-13	1.34909e-11	Up	Similar to NAC-domain containing protein 19 (ANAC019) (ANAC) (Abscicic-acid- responsive NAC).
Os01g0740650	7.97667	33.6	2.0746	4.23234e-13	1.42632e-11	Up	Similar to glutamate carboxypeptidase 2.
Os01g0158400	1.74333	9.63	2.46569	4.25053e-13	1.43094e-11	Up	Galactose-binding like domain containing protein.
Os03g0638400	0.383333	5.02333	3.71197	4.2573e-13	1.43171e-11	Up	Similar to OSIGBa0153E02-OSIGBa0093I20.19 protein.
Os04g0676800	1.37	5.28333	1.94727	4.2798e-13	1.43776e-11	Up	Conserved hypothetical protein.
Os07g0194100	3.16	16.5933	2.39261	4.32967e-13	1.45298e-11	Up	Similar to OSK2 (Fragment).
Os03g0837800	2.98	8.71333	1.54791	4.40587e-13	1.47435e-11	Up	Endoplasmic reticulum ERp29-type C-terminal domain containing protein.
Os03g0724500	5.40667	19.8567	1.87681	4.41012e-13	1.47435e-11	Up	Conserved hypothetical protein.
Os03g0794200	26.4367	270.543	3.35525	4.6039e-13	1.53374e-11	Up	Similar to N-acetyltransferase.
Os03g0406200	80.6633	165.303	1.03513	4.90449e-13	1.6254e-11	Up	Elongation factor 1 beta 2.
Os01g0578700	2.29667	10.48	2.19003	5.37979e-13	1.77372e-11	Up	Similar to SaM+.
Os02g0625900	1.87333	5.86667	1.64693	6.35843e-13	2.08134e-11	Up	Conserved hypothetical protein.
Os04g0487300	6.24667	17.37	1.47544	7.55441e-13	2.45772e-11	Up	Similar to DNA-directed RNA polymerases II 24 kDa polypeptide.
Os04g0574600	5.63667	13.32	1.24068	7.61391e-13	2.47456e-11	Up	Ankyrin repeat containing protein.
Os01g0627600	4.58	14.1767	1.6301	7.70589e-13	2.50191e-11	Up	Similar to Cytochrome P450 monooxygenase.
Os06g0142300	3.30333	57.74	4.12758	7.72317e-13	2.50497e-11	Up	Early nodulin 93 ENOD93 protein family protein.
Os08g0101800	16.64	50.07	1.58929	8.14355e-13	2.6333e-11	Up	Protein of unknown function DUF821 CAP10-like family protein.
Os10g0389000	29.7667	89.55	1.589	8.27057e-13	2.66897e-11	Up	Centrin.
Os06g0196200	0.58	5.9	3.34659	8.61971e-13	2.77603e-11	Up	Conserved hypothetical protein.
Os01g0884350	30.6567	110.34	1.84768	9.04604e-13	2.90455e-11	Up	Hypothetical protein.
Os03g0803500	6.75	21.3933	1.6642	9.21294e-13	2.95221e-11	Up	Similar to Prolyl 4-hydroxylase alpha-1 subunit-like protein.
Os05g0279400	16.56	41.7233	1.33315	9.67411e-13	3.0876e-11	Up	Zinc finger RING-type domain containing protein.
Os03g0669000	13.87	28.0567	1.01638	1.02236e-12	3.25665e-11	Up	DEAD-box RNA helicase Regulation of thermotolerant growth rRNA homeostasis at high temperature
Os12g0283400	0.533333	3.55667	2.73742	1.02242e-12	3.25665e-11	Up	Pectinesterase inhibitor domain containing protein.
Os07g0633200	12.7867	28.34	1.1482	1.03864e-12	3.30098e-11	Up	Similar to SC35-like splicing factor SCL30a 30a kD.
Os09g0352400	29.4633	63.0033	1.09651	1.04039e-12	3.30098e-11	Up	Similar to Bystin.
Os01g0155800	21.3433	116.12	2.44376	1.11912e-12	3.53647e-11	Up	Conserved hypothetical protein.
Os08g0539600	0.653333	6.73	3.36472	1.24049e-12	3.9002e-11	Up	Similar to Ankyrin repeat domain-containing protein 2.
Os07g0584200	7.12	19.6267	1.46287	1.24155e-12	3.9002e-11	Up	BTB/POZ fold domain containing protein.
Os11g0701600	1.87667	28.27	3.91303	1.25773e-12	3.94327e-11	Up	Glycoside hydrolase family 18 catalytic domain domain containing protein.
Os07g0674800	0.423333	9.48333	4.48553	1.26511e-12	3.96252e-11	Up	Similar to AP2 domain transcription factor EREBP.
Os05g0152201	17.93	42.02	1.2287	1.2714e-12	3.97833e-11	Up	Conserved hypothetical protein.
Os12g0576750	10.72	50.23	2.22824	1.27998e-12	4.00124e-11	Up	Nucleotide pyrophosphatase Hydrolysis of UDP ADP and adenosine 5'-phosphosulfate
Os05g0366300	6.41667	16.9333	1.39997	1.32086e-12	4.11695e-11	Up	Conserved hypothetical protein.
Os04g0476600	0.276667	3.01333	3.44514	1.38151e-12	4.2851e-11	Up	C2 calcium-dependent membrane targeting domain containing protein.
MSTRG.9782	1	3.56667	1.83458	1.45992e-12	4.52392e-11	Up	--
Os06g0189600	50.2	106.443	1.08433	1.50782e-12	4.66329e-11	Up	Hypothetical conserved gene.
Os03g0102200	11.9067	32.9067	1.46661	1.51268e-12	4.67379e-11	Up	Similar to DNA-directed RNA polymerase II 14.5 kDa polypeptide (EC 2.7.7.6) (RPB9) (RPB14.5).
Os06g0568600	3.51	9.72	1.46949	1.54797e-12	4.77361e-11	Up	Similar to Ent-kaurene oxidase 1 (Fragment).
Os12g0624800	2.35667	7.01	1.57267	1.57131e-12	4.84092e-11	Up	Conserved hypothetical protein.
Os07g0674200	322.17	751.143	1.22127	1.68257e-12	5.16872e-11	Up	Similar to 60S ribosomal protein L22-2.
Os02g0794600	10.6667	27.0733	1.34376	1.87179e-12	5.73346e-11	Up	Similar to Copper chaperone COX17-1.
MSTRG.5653	1.26333	4.03	1.67354	2.02074e-12	6.16605e-11	Up	--
Os05g0161400	6.29	14.3733	1.19226	2.03312e-12	6.1979e-11	Up	Peptidase trypsin-like serine and cysteine domain containing protein.
Os08g0520900	4	12.49	1.6427	2.21054e-12	6.69406e-11	Up	Starch-debranching enzyme Isoamylase 1 Amylopectin biosynthesis Starch biosynthesis
Os03g0154100	8.94333	26.17	1.54903	2.22503e-12	6.73156e-11	Up	Aromatic-ring hydroxylase family protein.
Os01g0810600	0.593333	2.59667	2.12975	2.26491e-12	6.83925e-11	Up	Similar to cDNA clone: J100063K14 full insert sequence.
Os01g0915900	72.89	213.373	1.54959	2.41219e-12	7.25657e-11	Up	Conserved hypothetical protein.
MSTRG.1827	0.316667	4.07333	3.68517	2.46426e-12	7.39928e-11	Up	--
Os04g0116200	2.76333	14.04	2.34506	2.47356e-12	7.4202e-11	Up	Protein of unknown function DUF827 plant family protein.
Os01g0185500	4.23	18.51	2.12958	2.48931e-12	7.45346e-11	Up	Protein of unknown function DUF1637 domain containing protein.
Os04g0182200	18.54	48.3	1.38138	2.67917e-12	7.9771e-11	Up	2OG-Fe(II) oxygenase domain containing protein.
Os07g0506600	6.55667	21.6967	1.72644	2.7603e-12	8.18512e-11	Up	Protein of unknown function DUF869 plant family protein.
Os03g0650700	5.33667	11.5233	1.11055	2.91839e-12	8.63302e-11	Up	Translation elongation factor EFG/EF2 C-terminal domain containing protein.
Os03g0845300	0.316667	2.54	3.00379	3.14804e-12	9.26945e-11	Up	Hypothetical conserved gene.
Os02g0134000	14.18	42.9667	1.59936	3.36323e-12	9.86671e-11	Up	Similar to bifunctional coenzyme A synthase.
Os08g0476900	11.2933	32.7467	1.53588	3.4401e-12	1.0083e-10	Up	Similar to Patatin-like protein 1.
Os10g0474000	0.586667	6.61667	3.49549	3.46192e-12	1.01376e-10	Up	Peptidase C48 SUMO/Sentrin/Ubl1 domain containing protein.
Os02g0684400	27.5	74.4433	1.43671	3.79073e-12	1.10701e-10	Up	Similar to OXS3 (OXIDATIVE STRESS 3).
Os05g0574600	3.80667	19.6867	2.37062	3.97028e-12	1.15627e-10	Up	Similar to 3-ketoacyl-CoA synthase.
Os08g0199000	2.02333	5.23333	1.371	4.16484e-12	1.21072e-10	Up	F-box domain cyclin-like domain containing protein.
Os11g0105400	21.85	48.97	1.16426	4.5369e-12	1.3141e-10	Up	Ribosomal protein L10 family protein.
Os03g0757500	0.906667	4.5	2.31128	4.66153e-12	1.34653e-10	Up	UDP-glucuronosyl/UDP-glucosyltransferase family protein.
Os01g0121600	10.1033	36.4567	1.85135	5.08685e-12	1.46146e-10	Up	Conserved hypothetical protein.
Os02g0233200	0.626667	3.93333	2.64998	5.45116e-12	1.56332e-10	Up	Similar to Brassinazole-resistant 1 protein.
Os03g0177900	502.027	1051.17	1.06616	6.20374e-12	1.76175e-10	Up	EF-1 alpha.
Os03g0140900	0.12	1.65	3.78136	6.4916e-12	1.83859e-10	Up	Conserved hypothetical protein.
Os07g0575700	4.36	14.98	1.78064	6.54764e-12	1.85283e-10	Up	Similar to Lectin-like receptor kinase 7%3B2.
Os06g0656700	2.67667	21.4467	3.00224	6.84811e-12	1.93101e-10	Up	Conserved hypothetical protein.
Os09g0427300	14.2	34.07	1.26261	7.37247e-12	2.06973e-10	Up	Similar to amino acid carrier.
Os08g0241300	0.966667	5.08	2.39374	8.21321e-12	2.29567e-10	Up	Similar to OSIGBa0118P15.3 protein.
Os08g0542100	43.3	114.84	1.40719	8.65691e-12	2.41547e-10	Up	Similar to 60S ribosomal protein L7.
Os12g0594600	3.52333	23.54	2.7401	9.87354e-12	2.73819e-10	Up	BTB/POZ fold domain containing protein.
Os06g0174300	7.23333	19.1933	1.40787	1.04258e-11	2.87885e-10	Up	Similar to predicted protein.
Os02g0332800	17.4033	42.3533	1.28311	1.08981e-11	2.9989e-10	Up	Hypothetical gene.
Os06g0702700	27.18	74.83	1.46107	1.09669e-11	3.01524e-10	Up	Butirosin biosynthesis BtrG-like domain containing protein.
Os01g0788950	20.2433	52.5967	1.37752	1.12539e-11	3.09149e-10	Up	Similar to partner of Nob1.
Os03g0661600	114.11	590.06	2.37044	1.13381e-11	3.11194e-10	Up	Similar to Alpha-amylase/trypsin inhibitor (Antifungal protein).
MSTRG.24233	0.346667	2.11667	2.61017	1.15294e-11	3.15902e-10	Up	--
Os06g0103400	15.7067	45.79	1.54366	1.17442e-11	3.21511e-10	Up	Nucleic acid-binding OB-fold domain containing protein.
Os01g0955000	29.2467	78.4967	1.42436	1.18329e-11	3.23663e-10	Up	Phosphoesterase family protein.
Os10g0118800	1.48667	7.21	2.27792	1.18994e-11	3.25202e-10	Up	Hypothetical conserved gene.
Os03g0126800	17.5433	36.0467	1.03894	1.19928e-11	3.27475e-10	Up	Similar to CBL-interacting protein kinase 9.
Os03g0844450	10.4633	23.3233	1.15643	1.28656e-11	3.49514e-10	Up	Similar to 3' exoribonuclease family domain 1-containing protein.
MSTRG.30031	1.81333	12.5667	2.79289	1.43477e-11	3.87145e-10	Up	PREDICTED: cytochrome c oxidase subunit 6b-1 [Oryza sativa Japonica Group]
Os03g0415500	0.783333	5.16333	2.7206	1.50893e-11	4.05785e-10	Up	Mitochondrial import inner membrane translocase subunit Tim17/22 family protein.
Os05g0592300	8.02667	19.38	1.2717	1.52841e-11	4.10678e-10	Up	Protein of unknown function DUF1637 family protein.
Os02g0168200	0.176667	5.09	4.84856	1.5371e-11	4.12486e-10	Up	Similar to Transfactor-like protein.
Os12g0191901	3.06667	21.2833	2.79498	1.72312e-11	4.59518e-10	Up	Hypothetical gene.
Os05g0405000	56.2467	192.913	1.77811	1.73763e-11	4.63002e-10	Up	Orthophosphate dikinase precursor (EC 2.7.9.1).
Os03g0407900	8.74333	25.22	1.52831	1.87727e-11	4.97719e-10	Up	Similar to Serine/threonine protein kinase-like.
Os01g0608900	1.06333	3.84333	1.85376	1.90531e-11	5.03898e-10	Up	Hypothetical gene.
Os07g0585900	6.07	19.9633	1.71758	1.92602e-11	5.08534e-10	Up	Hypothetical conserved gene.
Os01g0139700	4.60333	22.2133	2.27068	1.9454e-11	5.13225e-10	Up	Conserved hypothetical protein.
MSTRG.31303	0.613333	2.43667	1.99017	1.9643e-11	5.16505e-10	Up	--
Os04g0612700	0.0133333	2.2	7.36632	2.11847e-11	5.54308e-10	Up	Similar to Cinnamyl alcohol dehydrogenase (EC 1.1.1.195).
Os09g0395400	15.21	41.28	1.44042	2.48204e-11	6.45734e-10	Up	Hypothetical protein.
Os07g0692900	4.51667	12.7133	1.49301	2.48632e-11	6.46321e-10	Up	Similar to Ubiquitin-activating enzyme E1.
MSTRG.17249	4.31	12.4567	1.53116	2.5873e-11	6.69305e-10	Up	--
Os01g0663500	7.06333	16.55	1.22841	2.63224e-11	6.7983e-10	Up	Transcriptional coactivator/pterin dehydratase family protein.
Os08g0290500	14.2067	28.99	1.02899	2.69272e-11	6.94887e-10	Up	Similar to PHD finger family protein.
Os12g0420000	0.001	2.96667	11.5346	2.76084e-11	7.1189e-10	Up	Similar to OSIGBa0130B08.3 protein.
Os05g0565000	209.76	474.307	1.17708	2.84516e-11	7.31862e-10	Up	Similar to 60S ribosomal protein L18a-1.
Os12g0132400	7.86	20.07	1.35244	2.87607e-11	7.38624e-10	Up	Similar to Grwd-pending-prov protein.
Os01g0148700	42.09	95.1	1.17597	2.95486e-11	7.56424e-10	Up	Protein of unknown function DUF1677 Oryza sativa family protein.
Os12g0409000	28.5267	65.79	1.20556	3.017e-11	7.71714e-10	Up	Similar to Serine hydroxymethyltransferase.
Os03g0302800	2.02	9.77333	2.2745	3.08812e-11	7.88642e-10	Up	Similar to Long cell-linked locus protein.
Os05g0244700	5.82333	24.4833	2.07188	3.25359e-11	8.29574e-10	Up	Aminotransferase class IV family protein.
Os04g0110100	2.38	10.9	2.19529	3.26547e-11	8.31941e-10	Up	Concanavalin A-like lectin/glucanase domain containing protein.
Os05g0295900	6.52333	13.9	1.0914	3.32516e-11	8.45786e-10	Up	Conserved hypothetical protein.
Os11g0544300	5.40333	12.9567	1.26177	3.32776e-11	8.45786e-10	Up	Peptidase C12 ubiquitin carboxyl-terminal hydrolase 1 domain containing protein.
Os09g0483500	1.02	6.12333	2.58575	3.4252e-11	8.68479e-10	Up	EF-Hand type domain containing protein.
Os09g0521300	1.11	6.77333	2.60931	3.4808e-11	8.81876e-10	Up	Similar to TCP family transcription factor.
Os12g0155000	9.24	67.26	2.86378	3.52856e-11	8.93269e-10	Up	Germin-like protein 12-4 Disease resistance
Os05g0302600	11.1533	28.3233	1.34452	3.566e-11	9.02031e-10	Up	TRAM LAG1 and CLN8 homology domain containing protein.
Os05g0592000	0.853333	4.42333	2.37395	3.59814e-11	9.08004e-10	Up	Hypothetical conserved gene.
Os09g0570100	22.95	55.6133	1.27694	3.77793e-11	9.49626e-10	Up	Protein kinase catalytic domain domain containing protein.
Os06g0618000	0.443333	2.07	2.22317	4.40643e-11	1.0981e-09	Up	Nse4 domain containing protein.
Os08g0334900	2.72	7.39333	1.44262	4.43447e-11	1.10337e-09	Up	Xyloglucan fucosyltransferase family protein.
Os12g0114000	6.96667	27.5567	1.98386	5.18622e-11	1.27945e-09	Up	Conserved hypothetical protein.
Os01g0640700	8.37333	23.9	1.51314	5.31942e-11	1.3113e-09	Up	Similar to vegetative cell wall protein gp1.
Os07g0555100	0.48	3.40333	2.82584	5.51877e-11	1.3573e-09	Up	Conserved hypothetical protein.
Os02g0456500	2.45	5.87	1.26058	5.92907e-11	1.4504e-09	Up	Similar to GTP-binding protein.
Os03g0258200	8.23333	29.8933	1.86028	6.23237e-11	1.5211e-09	Up	Alpha/beta hydrolase fold-3 domain containing protein.
Os07g0167500	4.40333	14.9567	1.76412	6.4147e-11	1.56202e-09	Up	Conserved hypothetical protein.
Os10g0123200	0.423333	2.03333	2.26398	6.48759e-11	1.57856e-09	Up	Cyclin-like F-box domain containing protein.
MSTRG.3181	0.436667	2.95	2.75611	6.55418e-11	1.59355e-09	Up	--
Os01g0175400	0.366667	2.3	2.64909	6.60933e-11	1.60452e-09	Up	Ankyrin repeat containing protein.
Os07g0614100	9.45333	20.46	1.11391	6.72521e-11	1.63017e-09	Up	Alpha 1-2 subunit of 20S proteasome.
Os10g0491100	14.83	32.2967	1.12287	6.76903e-11	1.63955e-09	Up	Hypothetical conserved gene.
Os04g0531800	0.333333	1.48333	2.15381	6.93309e-11	1.67802e-09	Up	Conserved hypothetical protein.
Os07g0506700	8.27333	18.95	1.19566	7.11027e-11	1.7183e-09	Up	WD40 repeat-like domain containing protein.
Os11g0592000	176.847	900.587	2.34837	7.40153e-11	1.77926e-09	Up	Similar to Barwin.
Os09g0252000	21.9633	45.92	1.06403	7.81373e-11	1.86991e-09	Up	Similar to Exosome complex exonuclease RRP41.
Os10g0203000	17.6367	41.19	1.22372	8.04047e-11	1.92129e-09	Up	Endonuclease/exonuclease/phosphatase domain containing protein.
Os04g0671200	36.0033	108.497	1.59145	8.21946e-11	1.9626e-09	Up	Polyamine oxidase Seed germination
Os01g0528800	29.3367	71.2267	1.27971	8.37418e-11	1.99507e-09	Up	Similar to Cinnamyl alcohol dehydrogenase.
Os01g0757900	3.47	10.9867	1.66275	8.6165e-11	2.05127e-09	Up	Haloacid dehalogenase/epoxide hydrolase domain containing protein.
Os04g0136700	13.02	32.3933	1.31497	8.70008e-11	2.06808e-09	Up	Cystathionine beta-synthase core domain containing protein.
Os08g0162033	9.93667	22.9567	1.20808	8.82376e-11	2.09437e-09	Up	Similar to 50S ribosomal protein L13.
Os07g0573600	17.0033	35.32	1.05467	9.19737e-11	2.17567e-09	Up	Nucleotide excision repair TFIIH subunit TTDA domain containing protein.
Os08g0107500	33.04	74.34	1.16993	9.6246e-11	2.27263e-09	Up	Uncharacterised protein family Shwachman-Bodian-Diamond syndrome related domain containing protein.
MSTRG.33295	0.16	1.39	3.11894	9.76398e-11	2.30214e-09	Up	cell wall protein-like [Oryza sativa Japonica Group]
Os02g0134200	9.53333	35.4933	1.8965	1.01125e-10	2.37205e-09	Up	DUF1645 family protein Regulation of stress-tolerance and grain length
Os02g0537400	0.293333	2.34667	3	1.06832e-10	2.50042e-09	Up	Similar to Heat shock protein.
Os03g0758000	11.0633	36.6567	1.72829	1.09384e-10	2.55305e-09	Up	Similar to WRKY23 transcription factor (Fragment).
Os12g0153200	2.43	12.5767	2.37172	1.1029e-10	2.57006e-09	Up	Conserved hypothetical protein.
Os07g0164800	31.3533	62.9633	1.00589	1.10742e-10	2.57871e-09	Up	Conserved hypothetical protein.
Os02g0138200	10.2667	23.0233	1.16513	1.21143e-10	2.8127e-09	Up	RNA recognition motif RNP-1 domain containing protein.
Os10g0150200	7.4	20.0567	1.43848	1.26495e-10	2.93058e-09	Up	Sterile alpha motif homology domain containing protein.
Os08g0137800	19.8033	67.5367	1.76993	1.28162e-10	2.96489e-09	Up	Cupredoxin domain containing protein.
Os08g0558100	7.33	18.1367	1.30702	1.30324e-10	3.01274e-09	Up	EF hand domain containing protein.
Os04g0521700	3.16333	10.3933	1.71614	1.38655e-10	3.19837e-09	Up	Similar to OSIGBa0131L05.9 protein.
Os07g0584283	6.43	15.89	1.30523	1.42755e-10	3.28717e-09	Up	Hypothetical protein.
Os08g0481100	9.56333	25.1733	1.39631	1.43597e-10	3.30284e-09	Up	Similar to SKIP interacting protein 3 (Fragment).
Os03g0800400	0.78	4.32333	2.4706	1.50983e-10	3.46275e-09	Up	Protein of unknown function DUF1618 domain containing protein.
Os06g0670300	3.63333	18.33	2.33484	1.54186e-10	3.53366e-09	Up	Homeodomain-like containing protein.
Os06g0704000	0.77	2.88667	1.90647	1.55133e-10	3.55027e-09	Up	Protein of unknown function DUF659 domain containing protein.
Os12g0161700	1.15667	3.69	1.67365	1.62235e-10	3.70219e-09	Up	Conserved hypothetical protein.
Os03g0750000	0.09	2.19667	4.60925	1.66065e-10	3.77612e-09	Up	Similar to ethylene-responsive protein.
Os04g0610400	46.12	128.273	1.47576	1.67024e-10	3.79523e-09	Up	APETALA-2-like transcription Factor Control of the abscisic acid (ABA)/gibberellin (GA) balance
Os04g0615100	23.86	69.38	1.53993	1.69037e-10	3.83824e-09	Up	Similar to Lecithine cholesterol acyltransferase-like protein.
Os05g0509500	4.09	15.4067	1.91338	1.85297e-10	4.18958e-09	Up	Similar to Signal recognition particle 54 kDa protein 2 (SRP54).
Os06g0352200	16.7333	50.9567	1.60655	1.95914e-10	4.4047e-09	Up	Protein of unknown function DUF679 family protein.
Os05g0382550	0.986667	4.28667	2.11922	2.00033e-10	4.49129e-09	Up	Conserved hypothetical protein.
Os06g0166500	8.26667	22.12	1.41997	2.00047e-10	4.49129e-09	Up	Similar to Auxin-responsive protein IAA20 (Indoleacetic acid-induced protein 20).
Os11g0673200	3.78	14.5967	1.94918	2.01199e-10	4.51397e-09	Up	Similar to Auxin-induced beta-glucosidase.
Os08g0412200	87.1233	214.307	1.29855	2.01656e-10	4.52107e-09	Up	Nucleotide-binding alpha-beta plait domain containing protein.
Os01g0834500	225.667	489.007	1.11566	2.03498e-10	4.55915e-09	Up	Similar to 40S ribosomal protein S23 (S12).
Os10g0329400	0.773333	6.15	2.99142	2.37359e-10	5.27847e-09	Up	Conserved hypothetical protein.
Os08g0529000	0.0533333	1.05667	4.30834	2.66246e-10	5.86218e-09	Up	Auxin efflux carrier Auxin homeostasis transport and distribution
Os06g0161400	0.706667	2.65	1.90689	2.68992e-10	5.91856e-09	Up	Protein of unknown function DUF1618 domain containing protein.
Os06g0198500	1.88333	7.05333	1.90502	2.71588e-10	5.96746e-09	Up	RmlC-like jelly roll fold domain containing protein.
Os08g0189850	125.387	418.367	1.73838	2.75055e-10	6.03121e-09	Up	Germin-like protein 8-9 Disease resistance
Os01g0106500	11.1367	26.1367	1.23076	2.78819e-10	6.10954e-09	Up	Conserved hypothetical protein.
MSTRG.23278	2.79333	7.19333	1.36467	2.89571e-10	6.31082e-09	Up	--
Os06g0193400	18.1233	39.2233	1.11386	2.89585e-10	6.31082e-09	Up	Similar to Helix-loop-helix protein homolog.
Os01g0785700	7.63667	19.7933	1.374	2.90098e-10	6.31768e-09	Up	Pentatricopeptide repeat domain containing protein.
Os01g0348900	858.53	4219.14	2.29701	2.92883e-10	6.37399e-09	Up	Jacalin-related mannose-binding lectin Salinity tolerance
Os04g0573000	0.52	3.27333	2.65418	3.08916e-10	6.7001e-09	Up	SPX-MFS protein Phosphate transporter Pi homeostasis
MSTRG.27033	0.116667	0.886667	2.926	3.25529e-10	7.03654e-09	Up	--
Os06g0162700	0.03	0.96	5	3.29692e-10	7.1169e-09	Up	SANT domain DNA binding domain containing protein.
Os01g0221300	4.15333	9.82333	1.24194	3.35201e-10	7.20659e-09	Up	Conserved hypothetical protein.
Os07g0523100	24.97	57.4933	1.2032	3.54474e-10	7.59541e-09	Up	Similar to 60S ribosomal protein L44.
Os08g0149100	2.08333	6.05667	1.53963	3.59143e-10	7.6846e-09	Up	Conserved hypothetical protein.
Os07g0416900	7.08667	23.9233	1.75524	3.64176e-10	7.78241e-09	Up	Similar to Omega-6 fatty acid desaturase endoplasmic reticulum isozyme 2 (EC 1.14.19.-).
Os06g0482200	14.1567	34.0833	1.26758	3.73056e-10	7.96152e-09	Up	Thioredoxin fold domain containing protein.
Os04g0644300	25.07	58.5333	1.2233	3.7447e-10	7.98635e-09	Up	Similar to H0413E07.5 protein.
Os06g0535100	0.01	1.30667	7.02975	3.97834e-10	8.44913e-09	Up	Similar to predicted protein.
Os08g0445700	3.93667	17.7067	2.16925	3.9802e-10	8.44913e-09	Up	Class II trehalose-phosphate-synthase (TPS) gene family member Salt stress tolerance Control of yield-related traits
Os02g0755900	8.55667	36.3767	2.08789	4.00282e-10	8.48588e-09	Up	UDP-glucuronosyl/UDP-glucosyltransferase domain containing protein.
Os09g0508951	19.4433	49.9067	1.35996	4.02034e-10	8.51172e-09	Up	Hypothetical gene.
Os03g0204500	1.02333	17.5733	4.10204	4.07866e-10	8.6235e-09	Up	Conserved hypothetical protein.
MSTRG.1858	0.001	1.07667	10.0724	4.08123e-10	8.6235e-09	Up	--
Os09g0502000	130.807	280.22	1.09912	4.13455e-10	8.72461e-09	Up	Similar to Ribosomal L32.
Os03g0776400	10.6633	29.45	1.46561	4.1726e-10	8.79909e-09	Up	Conserved hypothetical protein.
Os01g0617800	9.88333	23.34	1.23973	4.19972e-10	8.8446e-09	Up	Conserved hypothetical protein.
Os04g0667600	20.5033	52.0233	1.3433	4.22483e-10	8.89162e-09	Up	Heavy metal transport/detoxification protein domain containing protein.
Os04g0632300	0.386667	1.66667	2.1078	4.43343e-10	9.28782e-09	Up	Similar to H0105C05.10 protein.
MSTRG.28194	20.79	43.6233	1.06921	4.54667e-10	9.50014e-09	Up	PREDICTED: transcription factor JUNGBRUNNEN 1-like [Oryza sativa Japonica Group]
Os06g0556300	4.01333	8.79333	1.13161	4.80717e-10	1.00182e-08	Up	Cyclin-like F-box domain containing protein.
MSTRG.8195	0.396667	5.89	3.89227	4.82519e-10	1.00427e-08	Up	PREDICTED: somatic embryogenesis receptor kinase 2 [Oryza sativa Japonica Group]
Os01g0623500	17.9967	41.4567	1.20387	5.01441e-10	1.04229e-08	Up	ATPase AAA-type core domain containing protein.
Os03g0153900	0.653333	2.82667	2.11321	5.24884e-10	1.08608e-08	Up	Aromatic-ring hydroxylase family protein.
Os04g0118400	189.13	385.473	1.02725	5.3828e-10	1.11163e-08	Up	Similar to Elongation factor EF-2 (Fragment).
Os06g0603000	125.38	342.263	1.4488	5.80332e-10	1.19462e-08	Up	Heme-oxygenase Phytochrome chromophore biosynthesis Nitric oxide- and auxin-induced lateral root formation
Os04g0494100	1.22333	12.08	3.30373	5.94501e-10	1.22064e-08	Up	Similar to Chitinase.
Os07g0194500	3.31333	8.79667	1.40867	5.95407e-10	1.22171e-08	Up	2OG-Fe(II) oxygenase domain containing protein.
Os06g0682900	11.63	29.7267	1.35391	6.03163e-10	1.23604e-08	Up	Heat stress associated protein Long-term acquired thermotolerance
Os11g0153000	1.42667	9.85	2.78748	6.5256e-10	1.33129e-08	Up	Conserved hypothetical protein.
Os04g0663500	4.87	13	1.41652	6.54872e-10	1.3343e-08	Up	Similar to OSIGBa0099L20.5 protein.
Os01g0171100	0.0966667	1.7	4.13637	6.73002e-10	1.36862e-08	Up	Ankyrin repeat domain containing protein.
Os01g0845000	5.42333	12.9967	1.26089	6.96131e-10	1.41117e-08	Up	Hypothetical conserved gene.
Os10g0409566	1.84333	3.93667	1.09466	7.04845e-10	1.42793e-08	Up	Hypothetical gene.
Os03g0580200	0.356667	5.75667	4.01259	7.78836e-10	1.57383e-08	Up	Lipase GDSL domain containing protein.
Os08g0330900	3.41667	12.49	1.87011	7.82259e-10	1.57875e-08	Up	Conserved hypothetical protein.
Os01g0120800	101.58	205.503	1.01655	8.041e-10	1.61976e-08	Up	Similar to Eukaryotic translation initiation factor 3 subunit 10 (eIF-3 theta) (Eukaryotic translation initiation factor 3 large subunit) (eIF3a).
Os08g0433500	17.8433	48.4267	1.44042	8.38822e-10	1.68545e-08	Up	Senescence-associated NAC transcription factor Negative regulation of leaf senescence Salt stress tolerance Plant architecture
Os11g0154500	5.11333	13.07	1.35392	8.5498e-10	1.71529e-08	Up	Blast disease-responsive transcription factor Disease resistance
Os05g0427200	5.17	17.75	1.77958	8.66202e-10	1.7361e-08	Up	Similar to Beta-1 3-galactosyltransferase sqv-2.
Os01g0865100	55.4	171.887	1.6335	8.73076e-10	1.74878e-08	Up	Similar to Uricase (Fragment).
Os10g0505700	2.58667	37.2367	3.84756	8.9679e-10	1.79291e-08	Up	Similar to Nonspecific lipid-transfer protein 2 (nsLTP2) (7 kDa lipid transfer protein).
Os02g0130300	18.8267	38.6067	1.03607	9.18622e-10	1.83197e-08	Up	Hypothetical conserved gene.
Os03g0722700	8.14667	16.45	1.01381	9.27574e-10	1.84867e-08	Up	Conserved hypothetical protein.
Os04g0650600	4.56333	9.59	1.07144	9.51341e-10	1.89132e-08	Up	Exonuclease domain containing protein.
Os03g0218500	5.09333	13.4967	1.40592	9.53926e-10	1.89528e-08	Up	Similar to 70kD heat shock protein.
Os11g0209200	3.01333	7.12	1.24052	9.76312e-10	1.93614e-08	Up	Similar to Ribosomal RNA apurinic site specific lyase.
Os01g0681100	0.163333	1.30667	3	9.8427e-10	1.95071e-08	Up	Similar to Dynamin-related protein 1B (Dynamin-like protein B).
Os10g0161400	0.53	2.74667	2.37362	1.01187e-09	2.00168e-08	Up	NB-ARC domain containing protein.
Os02g0767200	12.37	44.0267	1.83153	1.04111e-09	2.05572e-08	Up	Lipase class 3 family protein.
Os12g0141500	12.1567	25.33	1.0591	1.04617e-09	2.06315e-08	Up	Peptidase trypsin-like serine and cysteine domain containing protein.
Os12g0511200	2.00333	7.79333	1.95984	1.05604e-09	2.08133e-08	Up	Hly-III related domain containing protein.
Os01g0888900	8.12333	39.4067	2.2783	1.06908e-09	2.10185e-08	Up	Conserved hypothetical protein.
Os07g0141100	1.13	6.36667	2.49422	1.0773e-09	2.1167e-08	Up	Protein kinase core domain containing protein.
Os06g0235850	0.81	2.78	1.77909	1.09025e-09	2.13898e-08	Up	Conserved hypothetical protein.
Os05g0154600	53.8267	111.14	1.04599	1.09567e-09	2.1462e-08	Up	Similar to VIP2 protein.
Os02g0793500	0.756667	3.20333	2.08184	1.10439e-09	2.16062e-08	Up	Cyclin-like F-box domain containing protein.
Os01g0661400	6.52667	15.2467	1.22408	1.11364e-09	2.1774e-08	Up	S1 RNA binding domain containing protein.
Os08g0305000	5.07	13.5267	1.41575	1.16769e-09	2.27775e-08	Up	Conserved hypothetical protein.
Os11g0146800	4.17667	10.57	1.33955	1.19436e-09	2.32475e-08	Up	Meiosis-specific DNA recombinase Synaptonemal complex (SC) assembly
Os01g0233900	3.36333	8.4	1.3205	1.1948e-09	2.32475e-08	Up	Similar to cDNA clone:J013003E06 full insert sequence.
Os02g0549600	43.3967	107.903	1.31408	1.19483e-09	2.32475e-08	Up	Similar to 40S ribosomal protein S10-1.
Os02g0795900	6.2	12.8567	1.05218	1.22071e-09	2.37366e-08	Up	Similar to DEAD box-like RNA helicase (Fragment).
Os05g0177100	1.51	4.6	1.60709	1.26644e-09	2.45809e-08	Up	F-box domain cyclin-like domain containing protein.
Os11g0621300	23.8267	54.7667	1.20072	1.36524e-09	2.63863e-08	Up	Protein of unknown function DUF1399 family protein.
Os01g0121500	2.39	8.57333	1.84285	1.38692e-09	2.6773e-08	Up	Conserved hypothetical protein.
Os01g0618000	2.66667	11.03	2.04832	1.46087e-09	2.80817e-08	Up	Exonuclease domain containing protein.
Os07g0625400	8.58	33.27	1.95517	1.47721e-09	2.83788e-08	Up	SKP1 component domain containing protein.
Os09g0413600	32.5067	65.8867	1.01925	1.49869e-09	2.87051e-08	Up	Ribosomal protein L34e domain containing protein.
Os07g0608500	118.393	248.393	1.06904	1.5059e-09	2.88205e-08	Up	Similar to Ribosomal protein S3 (Fragment).
Os11g0160400	4.19	15.78	1.91308	1.52345e-09	2.90922e-08	Up	Conserved hypothetical protein.
Os07g0665900	10.04	24.19	1.26865	1.53599e-09	2.93142e-08	Up	Peptidase trypsin-like serine and cysteine domain containing protein.
Os01g0877500	3.61333	9.31333	1.36597	1.58624e-09	3.0255e-08	Up	Zinc finger RING/FYVE/PHD-type domain containing protein.
Os05g0169100	880.937	1925.4	1.12805	1.61961e-09	3.08546e-08	Up	Similar to 60S ribosomal protein L10 (QM protein homolog).
Os07g0620700	0.001	0.503333	8.97537	1.68e-09	3.1891e-08	Up	Conserved hypothetical protein.
Os12g0511300	6.05667	14.4467	1.25414	1.68219e-09	3.19137e-08	Up	CLT(CRT-like transporter) protein containing no plastid target signal peptide
Os04g0530000	4.93333	12.9	1.38674	1.73647e-09	3.28071e-08	Up	Similar to OSIGBa0155K17.8 protein.
Os10g0450900	6.44667	17.8033	1.46552	1.74338e-09	3.29182e-08	Up	Similar to Glycine-rich cell wall structural protein 2 precursor.
Os07g0209100	17.71	69.45	1.97141	1.82866e-09	3.43861e-08	Up	Similar to Seed imbibition protein (Fragment).
Os11g0210500	96.9233	259.943	1.42328	1.85213e-09	3.4807e-08	Up	Similar to Alcohol dehydrogenase.
Os11g0133001	2.08	11.9033	2.51671	1.87664e-09	3.52469e-08	Up	Similar to Ser/Thr protein kinase (Fragment).
Os12g0630500	88.16	284.263	1.68903	1.89573e-09	3.55635e-08	Up	Similar to Thaumatin-like protein.
Os01g0795600	2.27667	11.31	2.3126	1.96976e-09	3.68011e-08	Up	Conserved hypothetical protein.
MSTRG.28981	0.21	3.57	4.08746	1.98774e-09	3.70719e-08	Up	--
Os04g0624900	2.72333	12.5	2.19848	2.01437e-09	3.74811e-08	Up	Conserved hypothetical protein.
Os02g0218700	7.56667	37.1467	2.2955	2.02438e-09	3.76455e-08	Up	Allene oxide synthase (CYP74A3) Fatty acid 9-/13-hydroperoxide lyase (CYP74C) Biosynthesis of jasmonic acid (JA) Plant defense
Os04g0511200	0.466667	4.12667	3.14451	2.05096e-09	3.80954e-08	Up	EFA27 for EF hand abscisic acid 27kD.
Os01g0725000	2.98	9.33667	1.6476	2.05564e-09	3.81602e-08	Up	Similar to H0402C08.3 protein.
Os05g0452600	17.94	40.8833	1.18833	2.06142e-09	3.82453e-08	Up	Similar to 50S ribosomal protein L33.
Os02g0695700	9.47333	25.1167	1.4067	2.17552e-09	4.01754e-08	Up	Conserved hypothetical protein.
Os01g0372700	46.2867	96.5	1.05993	2.20473e-09	4.06913e-08	Up	Similar to Asparaginyl-tRNA synthetase cytoplasmic 1 (EC 6.1.1.22) (Asparagine-- tRNA ligase 1) (AsnRS 1).
Os06g0709000	4.68333	14.84	1.66388	2.22121e-09	4.09481e-08	Up	NAD(P)-binding domain containing protein.
Os01g0191400	0.116667	0.89	2.93141	2.28641e-09	4.20235e-08	Up	Hypothetical protein.
Os03g0439500	2.57333	7.90667	1.61943	2.31728e-09	4.24986e-08	Up	2OG-Fe(II) oxygenase domain containing protein.
Os10g0452100	7.63667	30.36	1.99116	2.33788e-09	4.28517e-08	Up	Conserved hypothetical protein.
Os10g0344550	0.001	2.19667	11.1011	2.3493e-09	4.30118e-08	Up	Conserved hypothetical protein.
Os04g0243400	4.07667	9.57	1.23113	2.35137e-09	4.30249e-08	Up	Myb/SANT-like domain domain containing protein.
Os12g0106000	6.73	29.2567	2.12009	2.48424e-09	4.51973e-08	Up	Ferritin Iron storage protein Iron homeostasis
Os03g0179000	7.14333	15.3233	1.10106	2.49349e-09	4.5314e-08	Up	Similar to Tubulin-tyrosine ligase family protein expressed.
MSTRG.12059	0.001	0.926667	9.85591	2.63432e-09	4.77376e-08	Up	PREDICTED: peroxidase P7 [Oryza sativa Japonica Group]
Os03g0755700	3.52667	9.8	1.47448	2.63585e-09	4.77382e-08	Up	Similar to Ribosomal protein L13a.
Os01g0663400	6.06667	17.5933	1.53605	2.68227e-09	4.85238e-08	Up	Similar to Aspartic proteinase oryzasin 1 precursor (EC 3.4.23.-).
Os01g0848900	1.70333	8.39333	2.30088	2.93188e-09	5.27705e-08	Up	Conserved hypothetical protein.
Os02g0478700	171.073	446.71	1.38472	2.96864e-09	5.33121e-08	Up	Ribosomal protein S27.
Os01g0374000	0.136667	17.8967	7.03289	2.97705e-09	5.3403e-08	Up	Similar to Glutathione S-transferase I (EC 2.5.1.18) (GST-I) (GST-29) (GST class- phi).
Os01g0627701	1.87333	5.94333	1.66566	3.01808e-09	5.40332e-08	Up	Hypothetical protein.
Os04g0538900	9.18333	37.4	2.02595	3.32711e-09	5.9151e-08	Up	Glyoxalase/bleomycin resistance protein/dioxygenase domain containing protein.
Os01g0859100	1.49333	5.84333	1.96826	3.42364e-09	6.06647e-08	Up	Similar to WIP1 protein (Fragment).
Os02g0604100	80.65	182.73	1.17997	3.46074e-09	6.11864e-08	Up	Conserved hypothetical protein.
MSTRG.30534	0.706667	4.73	2.74274	3.52768e-09	6.2301e-08	Up	--
Os08g0529300	3.52333	14.78	2.06863	3.60016e-09	6.35458e-08	Up	Hypothetical conserved gene.
Os04g0538000	1.79	5.29667	1.56513	3.65581e-09	6.44569e-08	Up	Tetratricopeptide TPR-1 domain containing protein.
Os11g0550300	2.64	5.37667	1.02617	3.72303e-09	6.55336e-08	Up	Hypothetical protein.
Os04g0485800	16.2833	37.3933	1.19939	3.72862e-09	6.55958e-08	Up	Cyclin-like F-box domain containing protein.
Os04g0167800	24.55	55.51	1.17702	3.73778e-09	6.56846e-08	Up	Similar to Chalcone reductase homologue (Fragment).
Os01g0884300	72.4633	186.033	1.36024	3.76527e-09	6.61312e-08	Up	No apical meristem (NAM) protein domain containing protein.
MSTRG.2733	0.001	0.66	9.36632	3.77251e-09	6.6222e-08	Up	cell wall protein-like [Oryza sativa Japonica Group]
Os10g0407400	7.54	25.6033	1.7637	3.7787e-09	6.62943e-08	Up	Hypothetical conserved gene.
Os05g0188100	183.797	908.203	2.3049	3.93841e-09	6.8907e-08	Up	Conserved hypothetical protein.
Os09g0542800	3.91333	10.9133	1.47962	4.24018e-09	7.37427e-08	Up	Pentatricopeptide repeat domain containing protein.
Os05g0132700	0.583333	2.48667	2.09182	4.55445e-09	7.90791e-08	Up	Similar to R2R3 Myb-like protein.
Os05g0299500	11.7067	27.7267	1.24394	4.76868e-09	8.25745e-08	Up	Protein of unknown function DUF914 eukaryotic family protein.
Os07g0622400	2.23	7.73667	1.79467	4.80142e-09	8.30513e-08	Up	Hypothetical protein.
MSTRG.33436	0.953333	135.62	7.15237	4.8312e-09	8.34944e-08	Up	--
Os02g0229000	231.277	476.207	1.04197	4.83255e-09	8.34944e-08	Up	Similar to 40S ribosomal protein S19-like.
Os01g0135700	12.06	25.6667	1.08967	4.83488e-09	8.34944e-08	Up	EF-HAND 2 domain containing protein.
Os03g0325600	3.91333	10.41	1.4115	4.88662e-09	8.43424e-08	Up	Similar to WUSCHEL-related homeobox 6.
Os06g0649000	8.14	19.1467	1.23399	5.01837e-09	8.64763e-08	Up	PAMP (pathogen-associated molecular pattern)-responsive transrepressor Defense response
Os07g0168800	56.5033	131.157	1.21488	5.34687e-09	9.15935e-08	Up	Zinc finger AN1-type domain containing protein.
MSTRG.33179	0.156667	14.01	6.48261	5.43269e-09	9.2964e-08	Up	--
Os11g0704300	2.81333	6.63	1.23673	5.47669e-09	9.36666e-08	Up	GTP1/OBG subdomain containing protein.
Os01g0946600	118.58	441.62	1.89694	5.5209e-09	9.42211e-08	Up	Conserved hypothetical protein.
Os04g0448100	1.29667	5.30667	2.033	5.54015e-09	9.44991e-08	Up	Protein of unknown function DUF1644 family protein.
Os08g0484200	0.616667	3.51333	2.51028	5.55817e-09	9.47558e-08	Up	Zinc finger RING/FYVE/PHD-type domain containing protein.
Os04g0502300	42.04	90.4067	1.10467	5.5812e-09	9.50977e-08	Up	Similar to 40S ribosomal protein S11.
Os08g0124500	5.29333	11.65	1.13808	5.67156e-09	9.64317e-08	Up	Similar to Resistance protein candidate (Fragment).
Os11g0572800	2.69667	7.69667	1.51306	5.69617e-09	9.66443e-08	Up	Cyclin-like F-box domain containing protein.
Os01g0175500	3.08667	9.19667	1.57506	6.055e-09	1.02352e-07	Up	Protein of unknown function DUF1618 domain containing protein.
Os07g0603200	11.44	23.5633	1.04246	6.07793e-09	1.02685e-07	Up	WD40 repeat-like domain containing protein.
Os02g0540400	1.36667	5.21333	1.93154	6.14955e-09	1.03815e-07	Up	Similar to Yarrowia lipolytica chromosome C of strain CLIB99 of Yarrowia lipolytica.
Os01g0957200	4.48667	11.1067	1.30771	6.31861e-09	1.0647e-07	Up	Protein of unknown function DUF3411 domain containing protein.
MSTRG.7029	0.113333	1.09	3.26568	6.69764e-09	1.12324e-07	Up	PREDICTED: protein LURP-one-related 8 [Oryza sativa Japonica Group]
Os03g0131100	8.76	22.8833	1.38529	6.91131e-09	1.15482e-07	Up	Octicosapeptide/Phox/Bem1p domain containing protein.
Os06g0342200	370.26	853.283	1.20449	6.93669e-09	1.15846e-07	Up	Similar to Eukaryotic translation initiation factor 1A (EIF-1A) (EIF-4C).
Os11g0146200	4.61333	10.93	1.24441	7.24058e-09	1.2048e-07	Up	Ankyrin repeat domain containing protein.
Os09g0325100	3.37	12.17	1.85251	7.25304e-09	1.20625e-07	Up	Conserved hypothetical protein.
Os03g0213600	0.446667	1.81667	2.02402	7.51957e-09	1.24862e-07	Up	Conserved hypothetical protein.
Os02g0478600	230.737	556.763	1.27082	7.5726e-09	1.25678e-07	Up	Similar to 40S ribosomal protein S15A.
Os04g0679400	89.09	288.083	1.69315	7.67902e-09	1.27311e-07	Up	Similar to H0801D08.15 protein.
Os11g0629300	15.84	35.3633	1.15868	7.93487e-09	1.31009e-07	Up	Similar to RING-H2 finger protein RHB1a.
Os07g0238800	0.796667	3.44333	2.11176	7.95694e-09	1.31306e-07	Up	Protein of unknown function DUF1723 domain containing protein.
Os01g0533000	13.1733	28.5233	1.11452	8.04931e-09	1.32625e-07	Up	Similar to predicted protein.
Os05g0575000	2.44667	10.1667	2.05496	8.22126e-09	1.35249e-07	Up	Similar to predicted protein.
Os01g0674400	8.1	27.4633	1.76151	8.25721e-09	1.3577e-07	Up	Hypothetical conserved gene.
Os05g0447700	4.70333	11.6233	1.30527	8.48266e-09	1.39048e-07	Up	Tetratricopeptide-like helical domain containing protein.
Os12g0508400	0.533333	8.54333	4.00169	8.62906e-09	1.41158e-07	Up	Conserved hypothetical protein.
Os04g0618600	8.18	16.8733	1.04457	9.02515e-09	1.47335e-07	Up	Similar to Long hypocotyl in far-red 1 (bHLH-like protein HFR1) (Reduced phytochrome signaling) (Basic helix-loop-helix FBI1 protein) (Basic helix-loop-helix protein 26) (bHLH26) (AtbHLH026) (Reduced sensitivity to far-red light).
Os06g0702400	2.38667	5.56	1.22009	9.03493e-09	1.4742e-07	Up	Conserved hypothetical protein.
Os05g0488100	4.33	10.4067	1.26507	9.29125e-09	1.51139e-07	Up	Conserved hypothetical protein.
Os01g0250600	31.27	67.4467	1.10897	9.32797e-09	1.51505e-07	Up	Conserved hypothetical protein.
Os01g0355100	0.81	2.27667	1.49093	9.35066e-09	1.51796e-07	Up	Pentatricopeptide repeat domain containing protein.
Os01g0681000	1.80667	6.72667	1.89656	9.45669e-09	1.5344e-07	Up	Uncharacterised protein family UPF0089 domain containing protein.
Os03g0344232	1.04333	5.31667	2.34932	9.53952e-09	1.54548e-07	Up	Conserved hypothetical protein.
MSTRG.10117	0.293333	4.28333	3.86812	9.66599e-09	1.56438e-07	Up	--
Os01g0947500	2.05333	7.92333	1.94814	9.68619e-09	1.56686e-07	Up	Conserved hypothetical protein.
Os08g0116500	1060.59	2183.58	1.04182	9.7036e-09	1.56888e-07	Up	Similar to 60S acidic ribosomal protein P1 (L12).
Os03g0405900	204.733	473.98	1.21108	9.92025e-09	1.6031e-07	Up	Hypothetical conserved gene.
Os12g0541300	1.15333	3.27333	1.50495	1.00809e-08	1.62824e-07	Up	NADPH oxidase Respiratory burst oxidase homolog Ethylene-induced aerenchyma formation in roots under oxygen-deficient conditions
Os02g0609200	0.27	9.73333	5.1719	1.06574e-08	1.71788e-07	Up	Similar to Atozi1 (Fragment).
Os07g0146700	0.001	1.55667	10.6042	1.09962e-08	1.77069e-07	Up	Hypothetical protein.
Os02g0191300	16.5733	55.19	1.73554	1.18059e-08	1.8963e-07	Up	Similar to Amino acid transporter-like protein.
MSTRG.29202	0.75	3.97333	2.40539	1.2007e-08	1.92467e-07	Up	--
MSTRG.8417	0.09	0.866667	3.26748	1.20109e-08	1.92467e-07	Up	cell wall protein-like [Oryza sativa Japonica Group]
Os07g0407900	1.02667	7.04333	2.77829	1.25239e-08	2.00157e-07	Up	Protein of unknown function DUF679 family protein.
Os05g0595100	86.33	296.797	1.78154	1.26007e-08	2.01284e-07	Up	Uridine-diphospho-(UDP)-glucose 4-epimerase Cell wall carbohydrate partitioning during nitrogen (N) limitation
Os07g0643000	1.67667	7.08333	2.07883	1.28112e-08	2.0434e-07	Up	Alpha/beta hydrolase fold-3 domain containing protein.
Os07g0271000	7.35667	21.18	1.52558	1.32926e-08	2.11385e-07	Up	Similar to GDP dissociation inhibitor protein OsGDI1.
Os02g0740600	19.7633	73.14	1.88783	1.33809e-08	2.12683e-07	Up	Conserved hypothetical protein.
Os03g0193075	14.86	41.7767	1.49126	1.3671e-08	2.16754e-07	Up	Similar to Yippee-like protein OJ1003C07.11.
Os02g0694700	0.15	0.98	2.70782	1.37287e-08	2.17453e-07	Up	Zinc finger RING-type domain containing protein.
Os10g0377000	14.14	32.1933	1.18698	1.39228e-08	2.20419e-07	Up	Conserved hypothetical protein.
Os09g0509400	6.09667	15.0933	1.30782	1.40965e-08	2.22838e-07	Up	Conserved hypothetical protein.
Os03g0184550	2.24667	7.92667	1.81893	1.4149e-08	2.23557e-07	Up	Similar to Dihydroflavonol-4-reductase.
Os11g0679700	4.08	23.4367	2.52213	1.44167e-08	2.27449e-07	Up	Glycerol-3-phosphate acyltransferase Anther development Pollen formation
Os05g0205050	8.77667	31.5967	1.84803	1.4426e-08	2.27483e-07	Up	Isoform 2 of Aquaporin NIP1-3.
Os07g0686800	6.68	21.17	1.6641	1.45293e-08	2.28887e-07	Up	Similar to Serine/threonine protein kinase-like.
Os01g0696701	0.946667	5.93	2.6471	1.47725e-08	2.32374e-07	Up	Hypothetical protein.
Os01g0114100	4.27333	11.9967	1.4892	1.48651e-08	2.33486e-07	Up	Similar to Protein kinase RLK17.
Os08g0538200	1.56	6.81667	2.12752	1.49423e-08	2.34583e-07	Up	Protein of unknown function DUF247 plant family protein.
Os04g0436900	0.256667	1.22667	2.25678	1.50137e-08	2.35589e-07	Up	Hypothetical protein.
Os06g0303700	7.28333	14.5967	1.00297	1.54219e-08	2.41637e-07	Up	Similar to Myb-like DNA-binding domain containing protein.
MSTRG.167	0.433333	1.66	1.93763	1.55754e-08	2.43803e-07	Up	--
Os12g0583700	6.13	18.18	1.56839	1.56016e-08	2.44094e-07	Up	Zinc finger C2H2-type domain containing protein.
Os03g0221200	17.88	41.5067	1.215	1.56976e-08	2.45355e-07	Up	Similar to Homocysteine S-methyltransferase 1 (EC 2.1.1.10) (S- methylmethionine:homocysteine methyltransferase 1) (SMM:Hcy S- methyltransferase 1) (ZmHMT-1).
Os01g0129600	0.683333	4.36333	2.67477	1.59243e-08	2.48534e-07	Up	Similar to LBD40 (LOB DOMAIN-CONTAINING PROTEIN 40).
Os05g0493100	1.91667	4.16333	1.11914	1.59376e-08	2.48621e-07	Up	Similar to KI domain interacting kinase 1.
Os02g0152200	3.24667	6.74	1.05379	1.6293e-08	2.53792e-07	Up	Protein of unknown function DUF1677 Oryza sativa family protein.
Os05g0547600	22.58	55.59	1.29978	1.64636e-08	2.56325e-07	Up	Hypothetical protein.
Os01g0189800	1.74667	5.79333	1.72979	1.64818e-08	2.56483e-07	Up	Protein of unknown function DUF1618 domain containing protein.
Os02g0271600	1.53	5.75333	1.91087	1.6799e-08	2.61293e-07	Up	Similar to Subtilase.
Os12g0634800	8.32333	17.8967	1.10446	1.75589e-08	2.72581e-07	Up	Protein of unknown function NUC189 C-terminal domain containing protein.
Os04g0502100	0.0266667	0.686667	4.6865	1.79803e-08	2.78852e-07	Up	Similar to H0311C03.10 protein.
Os08g0244750	0.001	1.3	10.3443	1.86563e-08	2.88495e-07	Up	Conserved hypothetical protein.
Os10g0182000	48.04	99.93	1.05668	1.86866e-08	2.88605e-07	Up	Similar to Alanyl-tRNA synthetase mitochondrial precursor (EC 6.1.1.7) (Alanine--tRNA ligase) (AlaRS).
MSTRG.8593	0.0733333	1.55	4.40166	1.86905e-08	2.88605e-07	Up	PREDICTED: L10-interacting MYB domain-containing protein-like [Setaria italica]
Os07g0571500	17.3233	43.5033	1.32841	1.88839e-08	2.9131e-07	Up	Similar to Transmembrane protein 49.
Os04g0635800	86.28	186.433	1.11156	1.88997e-08	2.91413e-07	Up	Acyl-CoA N-acyltransferase domain containing protein.
Os03g0122000	2.89667	9.07667	1.64777	1.89116e-08	2.91456e-07	Up	Serine/threonine protein kinase domain containing protein.
Os04g0607600	0.91	5.28	2.5366	1.91379e-08	2.94659e-07	Up	High-affinity K+ transporter (HKT) family protein Na+ exclusion from leaf blade upon salt stress
Os03g0233000	11.94	55.2033	2.20895	1.94444e-08	2.99234e-07	Up	Protein of unknown function DUF607 family protein.
Os05g0206200	1.03667	2.96667	1.51689	1.97498e-08	3.03788e-07	Up	Similar to Myb-like DNA-binding domain containing protein.
MSTRG.111	0.143333	1.71667	3.58216	1.97958e-08	3.04349e-07	Up	--
Os01g0532700	0.436667	1.66667	1.93236	2.0004e-08	3.07254e-07	Up	Conserved hypothetical protein.
Os06g0483150	0.001	0.826667	9.69116	2.02685e-08	3.10868e-07	Up	Glutamate dehydrogenase NAD-specific domain containing protein.
Os05g0597100	109.467	235.507	1.10528	2.04735e-08	3.13711e-07	Up	Histone H4 deacetylase Negative regulation of innate immunity
MSTRG.28196	1.3	5.82	2.16251	2.06024e-08	3.15535e-07	Up	--
Os03g0213800	6.37	13.1933	1.05044	2.08166e-08	3.18205e-07	Up	Mitochondrial substrate carrier family protein.
Os02g0527300	0.536667	1.93667	1.85148	2.23541e-08	3.39596e-07	Up	Similar to Heat shock transcription factor 31 (Fragment).
Os04g0615700	7.46667	15.4733	1.05125	2.26174e-08	3.43106e-07	Up	Argonaute and Dicer protein PAZ domain containing protein.
Os02g0134300	27.4933	55.3367	1.00915	2.2724e-08	3.4456e-07	Up	Protein of unknown function DUF701 zinc-binding putative family protein.
MSTRG.28746	8.31667	16.93	1.0255	2.28296e-08	3.45668e-07	Up	--
Os07g0192000	32.4867	74.2533	1.19261	2.31822e-08	3.50841e-07	Up	ATPase AAA-type core domain containing protein.
Os03g0728200	2.62	6.57667	1.32779	2.34179e-08	3.53905e-07	Up	Pentatricopeptide repeat domain containing protein.
Os03g0441500	29.4533	59.9667	1.02573	2.34631e-08	3.54412e-07	Up	ABC transporter-like domain containing protein.
Os03g0115200	117.94	272.503	1.20822	2.34736e-08	3.54412e-07	Up	Similar to Partner of Nob1%3B Pno1p%3B Yor145cp like KH domain containing protein transcripts identified by EST.
Os02g0324700	72.66	192.427	1.40508	2.36092e-08	3.56123e-07	Up	Similar to senescence-associated protein.
Os01g0144600	9.75	19.71	1.01545	2.409e-08	3.63031e-07	Up	Conserved hypothetical protein.
Os06g0125200	6.39	26.83	2.06996	2.49298e-08	3.74803e-07	Up	Protein of unknown function DUF581 family protein.
Os08g0342300	5.99	14.8267	1.30757	2.50747e-08	3.76451e-07	Up	BR receptor kinase Brassinosteroid (BR) perception in the root
Os04g0385600	5.16333	13.2833	1.36324	2.52158e-08	3.7839e-07	Up	Tetratricopeptide-like helical domain containing protein.
Os01g0362533	9.21	29.7033	1.68935	2.55461e-08	3.82988e-07	Up	Conserved hypothetical protein.
Os11g0633600	1.12667	5.42667	2.26801	2.58622e-08	3.87182e-07	Up	Hypothetical gene.
Os11g0666200	17.4233	36.0367	1.04844	2.68118e-08	4.00086e-07	Up	Similar to Protein kinase domain containing protein.
Os11g0136300	0.13	2.64667	4.34759	2.71647e-08	4.04974e-07	Up	Similar to Integral membrane protein DUF6 containing protein.
Os03g0339900	2.05	5.65	1.46263	2.7374e-08	4.07713e-07	Up	Similar to Serine/threonine protein kinase.
Os01g0763000	34.1667	69.2067	1.01832	2.85531e-08	4.23695e-07	Up	Protein of unknown function DUF2039 domain containing protein.
MSTRG.15191	0.216667	1.33	2.61788	3.06481e-08	4.5247e-07	Up	--
Os01g0136300	2.07667	7.35333	1.82413	3.14857e-08	4.63764e-07	Up	Conserved hypothetical protein.
Os05g0588700	2.01667	5.56	1.46311	3.19918e-08	4.70785e-07	Up	Paired amphipathic helix domain containing protein.
Os11g0151200	0.886667	2.78333	1.65035	3.22402e-08	4.74222e-07	Up	Hypothetical protein.
MSTRG.3500	2.78	10.1433	1.86738	3.33756e-08	4.8912e-07	Up	PREDICTED: cysteine-rich and transmembrane domain-containing protein A-like [Gossypium hirsutum]
MSTRG.32336	0.1	1.98667	4.31228	3.54611e-08	5.18021e-07	Up	--
Os01g0692000	1.17667	7.05667	2.58428	3.61492e-08	5.27349e-07	Up	Similar to Glutathione S-transferase GSTU6.
Os06g0667200	0.443333	2.15333	2.28011	3.61878e-08	5.27671e-07	Up	MADS-box transcription factor Vegetative development
Os03g0746000	0.05	0.696667	3.80047	3.6622e-08	5.32786e-07	Up	Hypothetical protein.
Os12g0161100	0.533333	3.33667	2.6453	3.68853e-08	5.36372e-07	Up	Zinc finger RING/FYVE/PHD-type domain containing protein.
Os07g0217600	2.21	14.8567	2.74899	3.70251e-08	5.37917e-07	Up	CytochromeP450 monooxygenase Diterpenoid phytoalexin biosynthesis Bacterial blight resistance
Os05g0112750	14.3167	34.3867	1.26415	3.71267e-08	5.39148e-07	Up	Phosphatidylinositol transfer protein-like N-terminal domain containing protein.
Os12g0128200	0.736667	2.37667	1.68986	3.74146e-08	5.43081e-07	Up	Pentatricopeptide repeat domain containing protein.
MSTRG.12493	0.001	0.626667	9.29155	3.74514e-08	5.43369e-07	Up	--
Os08g0133000	16.7	36.69	1.13554	3.8037e-08	5.51114e-07	Up	Protein of unknown function DUF1637 family protein.
Os02g0560200	0.226667	1.57	2.79212	3.80943e-08	5.51694e-07	Up	RING-H2 type E3 ubiquitin ligase Root development Maintenance of cell viability after the initiation of root primordial formation Defense response
Os09g0103400	4.59667	12.98	1.49763	4.07678e-08	5.88143e-07	Up	Conserved hypothetical protein.
Os04g0661100	2.38333	7.86333	1.72216	4.07768e-08	5.88143e-07	Up	Similar to H0112G12.8 protein.
Os05g0123000	0.993333	5.22	2.3937	4.18999e-08	6.03525e-07	Up	Similar to Lateral organ boundaries domain 1.
Os02g0514500	25.7033	62.2067	1.27511	4.23599e-08	6.09601e-07	Up	Similar to Glycerophosphoryl diester phosphodisterase (Fragment).
Os06g0152700	2.93333	7.48	1.3505	4.28813e-08	6.15994e-07	Up	Protein of unknown function DUF821 CAP10-like family protein.
Os07g0673400	0.38	2.33667	2.62038	4.34334e-08	6.23084e-07	Up	Rossmann-like alpha/beta/alpha sandwich fold domain containing protein.
Os03g0758050	1.43333	5.47333	1.93305	4.34775e-08	6.23437e-07	Up	Hypothetical conserved gene.
Os07g0271500	0.0233333	0.89	5.25334	4.37395e-08	6.26913e-07	Up	Similar to Chalcone synthase.
Os01g0151900	1.16333	4.26	1.87259	4.38729e-08	6.28543e-07	Up	Pentatricopeptide repeat domain containing protein.
Os03g0650900	13.36	34.6667	1.37563	4.39223e-08	6.28687e-07	Up	Ortholog of Arabidopsis NLA (AtNLA) RING-type E3 ubiquitin-ligase
Os07g0483400	7.48667	15.8	1.07753	4.46983e-08	6.38936e-07	Up	Protein of unknown function DUF2365 domain containing protein.
Os07g0178600	2.83667	6.75	1.25069	4.50113e-08	6.43122e-07	Up	Similar to Heat shock transcription factor 29 (Fragment).
Os01g0278600	1.62	4.41333	1.44587	4.70142e-08	6.70241e-07	Up	PDZ/DHR/GLGF domain containing protein.
Os12g0123700	4.18667	17.2533	2.043	4.71107e-08	6.71317e-07	Up	NAC domain containing transcription factor Abiotic and biotic stress response
Os04g0163800	5.42667	11.4867	1.08182	4.71571e-08	6.7167e-07	Up	Protein of unknown function DUF594 family protein.
Os02g0560600	0.203333	1.44667	2.83081	4.88887e-08	6.93868e-07	Up	RING-H2 type E3 ubiquitin ligase Root development Maintenance of cell viability after the initiation of root primordial formation Defense response
Os03g0807600	1.43667	10.3933	2.85486	5.08811e-08	7.21184e-07	Up	Similar to Cyclopropane-fatty-acyl-phospholipid synthase family protein expressed.
Os11g0670900	12.0067	24.87	1.05057	5.18255e-08	7.33269e-07	Up	Conserved hypothetical protein.
Os03g0168500	0.763333	5.79	2.92318	5.22865e-08	7.39136e-07	Up	Hypothetical conserved gene.
Os03g0796000	3.79	9.36	1.30431	5.23962e-08	7.40032e-07	Up	Hypothetical conserved gene.
MSTRG.29755	2.19	7.70667	1.81518	5.26318e-08	7.42375e-07	Up	WRKY17-like [Oryza sativa Japonica Group]
Os09g0568700	0.15	2.38333	3.98995	5.58417e-08	7.83157e-07	Up	RmlC-like jelly roll fold domain containing protein.
Os12g0478200	14.05	33.0333	1.23335	5.67574e-08	7.95301e-07	Up	Hypothetical protein.
Os03g0592100	1.57667	3.40333	1.11007	5.76157e-08	8.05561e-07	Up	Hypothetical conserved gene.
Os10g0463800	39.4467	92.7233	1.23303	5.79609e-08	8.10033e-07	Up	Domain of unknown function DUF1338 containing green-plant-unique protein Regulation of starch synthesis and amyloplast development Peripheral endosperm development
Os11g0578100	4.32	8.76333	1.02045	5.80459e-08	8.10838e-07	Up	Heat shock protein DnaJ N-terminal domain containing protein.
Os01g0358400	142.3	292.64	1.04019	5.82265e-08	8.12677e-07	Up	Similar to 40S ribosomal protein S4.
Os10g0379100	4.47667	12.58	1.49064	5.85717e-08	8.16426e-07	Up	Transferase family protein.
MSTRG.32762	0.001	0.6	9.22882	5.94201e-08	8.26094e-07	Up	--
Os01g0208000	0.0433333	2.88333	6.05612	5.94764e-08	8.26512e-07	Up	Protein of unknown function DUF6 transmembrane domain containing protein.
Os06g0147100	38.2933	101.817	1.41081	5.95347e-08	8.26962e-07	Up	Similar to cDNA clone:J023088C01 full insert sequence.
Os07g0258100	1.58	4.98	1.65622	6.07899e-08	8.44031e-07	Up	Conserved hypothetical protein.
Os09g0420700	24.55	49.5933	1.01442	6.35953e-08	8.80304e-07	Up	Similar to Cox17p.
Os06g0105100	0.556667	16.7167	4.90833	6.4862e-08	8.96673e-07	Up	Similar to Legumain.
Os03g0107700	33.7333	70.9033	1.07168	6.53539e-08	9.03083e-07	Up	Similar to EL2 protein.
Os02g0269600	3.19	10.0867	1.66082	6.57405e-08	9.07639e-07	Up	Similar to Subtilase.
Os01g0920450	23.4333	56.7733	1.27665	6.68426e-08	9.20865e-07	Up	Conserved hypothetical protein.
Os06g0331500	19.2033	44.5667	1.21461	6.77405e-08	9.32833e-07	Up	Conserved hypothetical protein.
Os06g0683800	2.16667	9.40333	2.1177	6.82609e-08	9.39189e-07	Up	Conserved hypothetical protein.
Os01g0795400	4.74	11.5967	1.29075	6.87798e-08	9.45515e-07	Up	Similar to Subtilase.
Os03g0597400	0.633333	2.49667	1.97897	7.09789e-08	9.74069e-07	Up	Protein of unknown function DUF1618 domain containing protein.
Os12g0131300	2.57	7.05333	1.45654	7.10287e-08	9.74335e-07	Up	Similar to cDNA clone: J065154E06 full insert sequence.
Os09g0571400	50.9567	129.613	1.34687	7.28534e-08	9.97652e-07	Up	Cyclophilin 1.
MSTRG.21576	0.226667	2.12667	3.22995	7.39081e-08	1.01079e-06	Up	PREDICTED: CSC1-like protein At1g32090 [Oryza sativa Japonica Group]
Os07g0558900	0.636667	9.24	3.85928	7.4285e-08	1.01508e-06	Up	Protein of unknown function wound-induced domain containing protein.
MSTRG.15160	3.27	12.2433	1.90463	7.44555e-08	1.01698e-06	Up	--
MSTRG.7724	0.001	0.993333	9.95613	7.5732e-08	1.03309e-06	Up	PREDICTED: anthranilate O-methyltransferase 1 [Oryza sativa Japonica Group]
Os12g0159700	0.433333	1.65667	1.93473	7.5789e-08	1.03342e-06	Up	Similar to protein binding protein.
MSTRG.7930	0.756667	2.62	1.79184	7.70117e-08	1.04875e-06	Up	--
Os03g0734100	267.71	720.61	1.42855	7.83782e-08	1.066e-06	Up	Conserved hypothetical protein.
Os09g0517800	0.413333	1.60667	1.95869	7.9847e-08	1.08505e-06	Up	Cyclin-like F-box domain containing protein.
Os12g0111700	0.976667	3.77667	1.95118	8.08475e-08	1.09771e-06	Up	Conserved hypothetical protein.
Os01g0803200	337.693	1092.28	1.69355	8.121e-08	1.10217e-06	Up	Cysteine proteinase inhibitor-I (Oryzacystatin-I).
Os08g0527800	0.19	1.28667	2.75957	8.21238e-08	1.11362e-06	Up	Similar to Ubiquitin carboxyl-terminal hydrolase.
Os02g0511800	2.24667	9.30667	2.05048	8.27232e-08	1.12127e-06	Up	NOP5 N-terminal domain containing protein.
Os05g0139200	0.913333	2.99333	1.71254	8.40434e-08	1.13628e-06	Up	Cyclin-like F-box domain containing protein.
Os01g0729600	0.0433333	1.27667	4.88076	8.47547e-08	1.14444e-06	Up	Pyridoxal phosphate-dependent transferase major region subdomain 1 domain containing protein.
Os01g0134200	1	2.68667	1.42582	8.59068e-08	1.15755e-06	Up	Similar to Universal stress protein family protein.
Os08g0209000	0.846667	4.57667	2.43443	8.69852e-08	1.1706e-06	Up	Conserved hypothetical protein.
Os07g0537250	4.96	12.95	1.38454	8.77201e-08	1.17999e-06	Up	Hypothetical gene.
Os01g0927300	4.00667	11.9333	1.57452	8.98007e-08	1.20696e-06	Up	Heavy metal transport/detoxification protein domain containing protein.
Os03g0774300	7.9	18.1633	1.2011	9.03694e-08	1.2141e-06	Up	HAD superfamily (subfamily IG) hydrolase 5'-Nucleotidase protein.
Os02g0517300	25.9433	52.6733	1.02171	9.31765e-08	1.24866e-06	Up	Topoisomerase II-associated protein PAT1 domain containing protein.
Os03g0302000	30.4267	66.6733	1.13177	9.41201e-08	1.26077e-06	Up	Peroxisomal protein Peroxisomal biogenesis factor 11 Salt stress tolerance Antioxidant defense
Os12g0171600	3.97	11.95	1.5898	9.4494e-08	1.26419e-06	Up	Conserved hypothetical protein.
Os06g0332600	6.01	12.9033	1.10231	9.46016e-08	1.2651e-06	Up	Similar to Rf2 protein.
Os01g0286900	1.44333	5.07667	1.81448	9.54947e-08	1.27491e-06	Up	Similar to Auxin-responsive protein IAA31 (Indoleacetic acid-induced protein 31).
Os05g0568100	4.05	10.5867	1.38625	9.85285e-08	1.31432e-06	Up	Similar to Iron sulfur cluster assembly protein 1 mitochondrial precursor (Iron sulfur cluster scaffold protein 1).
Os03g0213400	14.2633	34.2567	1.26407	9.99098e-08	1.33052e-06	Up	Similar to RNA helicase.
Os10g0501300	3.45333	7.65333	1.1481	1.00451e-07	1.33717e-06	Up	Pentatricopeptide repeat domain containing protein.
Os02g0694100	0.933333	3.45333	1.88753	1.02139e-07	1.35737e-06	Up	Cyclin-like F-box domain containing protein.
MSTRG.4196	0.213333	2.04	3.25739	1.04536e-07	1.38577e-06	Up	--
Os11g0579800	31.9067	66.43	1.05798	1.0539e-07	1.39652e-06	Up	Gar1 protein RNA-binding region family protein.
Os12g0457500	0.001	0.31	8.27612	1.07067e-07	1.41756e-06	Up	Conserved hypothetical protein.
Os03g0584400	3.87	12.9433	1.7418	1.09221e-07	1.44429e-06	Up	ATPase AAA-type core domain containing protein.
Os01g0165100	1.14667	3.91667	1.77218	1.12111e-07	1.48006e-06	Up	Conserved hypothetical protein.
Os10g0438700	5.90667	15.56	1.39743	1.18216e-07	1.55294e-06	Up	Protein of unknown function DUF343 family protein.
Os03g0348900	18.14	53.4967	1.56027	1.26466e-07	1.65451e-06	Up	Similar to CHY zinc finger family protein expressed.
Os05g0135450	153.617	328.857	1.09812	1.27944e-07	1.67249e-06	Up	Hypothetical protein.
Os02g0781700	35.12	80.95	1.20474	1.34422e-07	1.75357e-06	Up	Conserved hypothetical protein.
Os09g0513900	8.05667	24.6333	1.61236	1.35306e-07	1.76295e-06	Up	Conserved hypothetical protein.
Os08g0548300	15.2933	31.0833	1.02324	1.38962e-07	1.80837e-06	Up	Zinc finger RING/FYVE/PHD-type domain containing protein.
Os08g0189700	76.0467	234.263	1.62317	1.42881e-07	1.85484e-06	Up	Germin-like protein 8-8 Disease resistance
MSTRG.26250	0.273333	2.64	3.2718	1.45112e-07	1.88227e-06	Up	integrase core domain containing protein [Oryza sativa Japonica Group]
MSTRG.32937	0.126667	1.13	3.15721	1.47137e-07	1.90391e-06	Up	cell wall protein-like [Oryza sativa Indica Group]
Os05g0583200	1.82333	4.12333	1.17723	1.55866e-07	2.00569e-06	Up	Zinc finger BED-type predicted domain containing protein.
Os07g0626200	4.33333	9.51	1.13397	1.55871e-07	2.00569e-06	Up	DNA-binding SAP domain containing protein.
Os11g0100800	1.08333	3.41333	1.6557	1.55882e-07	2.00569e-06	Up	Similar to Exo70 exocyst complex subunit family protein.
Os03g0362500	0.18	1.00667	2.48352	1.56434e-07	2.01117e-06	Up	Similar to Terpene synthase family metal binding domain containing protein expressed.
Os08g0531300	3.27	7.87333	1.26768	1.61065e-07	2.06738e-06	Up	DHBP synthase RibB-like alpha/beta domain domain containing protein.
Os03g0674600	1.25	2.76	1.14274	1.62229e-07	2.08065e-06	Up	Similar to Growth regulating factor (Fragment).
Os09g0532000	43.6067	104.237	1.25724	1.64509e-07	2.10904e-06	Up	Senescence-inducible chloroplast protein Activation of the chlorophll-degrading pathway during leaf senescence
Os05g0562800	37.7367	92.23	1.28927	1.65146e-07	2.11637e-06	Up	Protein of unknown function DUF679 family protein.
Os09g0483100	0.323333	4.54	3.8116	1.69075e-07	2.16498e-06	Up	EF-Hand type domain containing protein.
Os03g0182600	187.353	409.613	1.1285	1.70552e-07	2.18039e-06	Up	Ribosomal protein S2 family protein.
Os01g0719100	33.57	87.1233	1.37589	1.8298e-07	2.32347e-06	Up	Similar to RING finger and CHY zinc finger domain-containing protein 1.
Os01g0243000	1.72667	4.09	1.24411	1.83779e-07	2.33269e-06	Up	Similar to triacylglycerol lipase.
Os08g0495500	14.4967	34.7867	1.26281	1.84991e-07	2.3462e-06	Up	Kelch related domain containing protein.
Os01g0639600	20.0867	48.3267	1.26658	1.85655e-07	2.3537e-06	Up	Protein of unknown function DUF1645 family protein.
Os01g0514000	51.3367	125.607	1.29085	1.86809e-07	2.36644e-06	Up	Similar to 50S ribosomal protein L24e.
Os12g0517100	0.286667	2.35	3.03521	1.87141e-07	2.36971e-06	Up	Cyclin-like F-box domain containing protein.
MSTRG.9803	1.34	4.65333	1.79603	1.93149e-07	2.43698e-06	Up	PREDICTED: cysteine-rich receptor-like protein kinase 10 [Oryza sativa Japonica Group]
MSTRG.14695	0.51	2.35	2.20409	1.96012e-07	2.46932e-06	Up	--
Os06g0683700	17.9067	49.62	1.47042	1.99106e-07	2.50336e-06	Up	Similar to wound induced protein.
Os01g0773800	0.146667	1.43667	3.29211	2.01438e-07	2.53069e-06	Up	Hypothetical conserved gene.
Os05g0464200	3.24	17.5733	2.43932	2.06789e-07	2.59384e-06	Up	Hypothetical conserved gene.
Os11g0184800	1.62	6.45333	1.99405	2.07393e-07	2.59962e-06	Up	Similar to Aspartic proteinase Asp1 precursor (EC 3.4.23.-)
Os08g0189900	297.647	995.247	1.74145	2.08746e-07	2.61325e-06	Up	Germin-like protein 8-10 Disease resistance
Os04g0510400	10.1867	21.48	1.07631	2.09239e-07	2.6184e-06	Up	Similar to RNA helicase (Fragment).
MSTRG.33287	0.0566667	0.856667	3.91816	2.14452e-07	2.67839e-06	Up	cell wall protein-like [Oryza sativa Japonica Group]
Os05g0263100	0.263333	9.73	5.20748	2.19372e-07	2.73449e-06	Up	Similar to SHR5-receptor-like kinase (Fragment).
Os06g0160700	1.32	4.75333	1.8484	2.25204e-07	2.80173e-06	Up	Starch synthase Starch biosynthesis
Os05g0104650	1.47	3.90333	1.40889	2.27837e-07	2.83227e-06	Up	Similar to Formylglycinamide ribonucleotide amidotransferase (Fragment).
Os02g0181900	4.7	10.4067	1.14678	2.28546e-07	2.83998e-06	Up	Similar to ClpB.
Os06g0536200	3.62333	12.9433	1.83682	2.28889e-07	2.84314e-06	Up	Hypothetical gene.
Os07g0180800	0.703333	2.53333	1.84876	2.29654e-07	2.85123e-06	Up	RNA recognition motif domain domain containing protein.
Os08g0106501	16.5167	34.8933	1.07903	2.29719e-07	2.85123e-06	Up	Protein of unknown function DUF679 family protein.
Os07g0688200	4.45	14.1167	1.66552	2.40724e-07	2.97972e-06	Up	Similar to Typical P-type R2R3 Myb protein (Fragment).
Os06g0161900	0.48	1.61333	1.74894	2.47094e-07	3.05265e-06	Up	Protein of unknown function DUF569 family protein.
MSTRG.22720	0.33	2.01667	2.61143	2.48291e-07	3.06507e-06	Up	--
Os05g0223000	43.4233	90.72	1.06295	2.5033e-07	3.08785e-06	Up	Similar to TCH2 (TOUCH 2)%3B calcium ion binding.
Os05g0110800	9.42667	23.2	1.29931	2.57754e-07	3.1733e-06	Up	Conserved hypothetical protein.
Os02g0807000	90.3633	288.073	1.67263	2.67029e-07	3.27739e-06	Up	Similar to Phosphoenolpyruvate carboxylase kinase 1.
Os02g0553500	4.10667	10.06	1.29259	2.68056e-07	3.28874e-06	Up	Tetratricopeptide-like helical domain containing protein.
Os12g0629700	426.18	1842.71	2.11229	2.68482e-07	3.2927e-06	Up	Similar to Thaumatin-like protein precursor.
Os04g0450600	31.1733	83.3967	1.41968	2.69098e-07	3.29898e-06	Up	Similar to H0818E04.21 protein.
Os02g0318200	0.19	1.50333	2.98409	2.70321e-07	3.3127e-06	Up	Conserved hypothetical protein.
Os06g0129900	31.4567	70.6433	1.16719	2.71002e-07	3.31977e-06	Up	Similar to Cytochrome P450 CYPD.
Os08g0205800	7.92	20.0967	1.34338	2.74724e-07	3.3615e-06	Up	Hypothetical conserved gene.
Os08g0544400	0.95	5.93333	2.64284	2.8012e-07	3.42082e-06	Up	ABC-2 type transporter domain containing protein.
Os05g0193800	5.49667	13.2667	1.27118	2.81239e-07	3.43202e-06	Up	Conserved hypothetical protein.
Os12g0133100	5.17667	11.4733	1.14819	2.84746e-07	3.46951e-06	Up	Major facilitator superfamily protein.
Os05g0106500	1.44	4.23333	1.55573	2.87488e-07	3.49759e-06	Up	Similar to Chaperone protein dnaJ.
Os06g0494400	8.07333	17.5533	1.12051	2.95188e-07	3.57961e-06	Up	Multi antimicrobial extrusion protein MatE family protein.
Os09g0384900	0.001	3.36	11.7142	2.98311e-07	3.61012e-06	Up	Protein of unknown function DUF295 family protein.
Os02g0773732	0.513333	2.41	2.23107	2.98319e-07	3.61012e-06	Up	Hypothetical conserved gene.
Os03g0603600	7.04	16.5367	1.23202	3.08298e-07	3.72101e-06	Up	PLC-like phosphodiesterase TIM beta/alpha-barrel domain domain containing protein.
Os11g0202600	4.2	8.94	1.08989	3.09351e-07	3.72809e-06	Up	Similar to OSIGBa0126J24.2 protein.
Os11g0109900	4.52333	9.19	1.02268	3.18756e-07	3.83275e-06	Up	Double-stranded RNA-binding-like domain containing protein.
Os06g0148700	0.373333	2.28667	2.61471	3.19734e-07	3.84162e-06	Up	Conserved hypothetical protein.
MSTRG.19461	0.306667	3.21333	3.38933	3.24419e-07	3.89351e-06	Up	PREDICTED: protein tesmin/TSO1-like CXC 4 [Oryza sativa Japonica Group]
Os09g0456800	40.77	101.59	1.31718	3.25258e-07	3.90065e-06	Up	Similar to Heat stress transcription factor Spl7 (Heat shock transcription factor) (Heat shock factor RHSF10).
Os10g0452300	0.243333	3.75667	3.94845	3.31284e-07	3.96846e-06	Up	Eggshell protein family protein.
Os12g0190400	1.51333	6.01667	1.99123	3.3162e-07	3.97099e-06	Up	Similar to NifS-like protein.
MSTRG.12264	1.06333	2.80667	1.40026	3.41056e-07	4.07786e-06	Up	--
Os05g0307100	2.54667	6.79333	1.41551	3.44483e-07	4.11114e-06	Up	Similar to tetracycline transporter protein.
MSTRG.5864	0.366667	2.17	2.56515	3.45634e-07	4.12181e-06	Up	--
Os07g0523500	38.7833	83.5833	1.10778	3.47979e-07	4.14668e-06	Up	Similar to 60S ribosomal protein L44.
Os12g0141600	3.02667	6.72667	1.15216	3.49111e-07	4.15551e-06	Up	Hypothetical conserved gene.
Os06g0128600	1.15667	4.59	1.98852	3.5644e-07	4.23644e-06	Up	Ankyrin repeat containing protein.
Os04g0594000	2.82667	5.99333	1.08426	3.65671e-07	4.33647e-06	Up	Similar to OSIGBa0142I02-OSIGBa0101B20.26 protein.
Os07g0514400	0.8	2.34333	1.55049	3.72632e-07	4.4092e-06	Up	Domain of unknown function DUF629 domain containing protein.
MSTRG.11507	0.0866667	1.3	3.90689	3.73033e-07	4.41231e-06	Up	--
Os04g0486950	23.86	87.1033	1.86813	3.8839e-07	4.5804e-06	Up	Similar to Malate synthase.
Os08g0285100	0.01	0.986667	6.62449	3.89451e-07	4.58952e-06	Up	Conserved hypothetical protein.
Os07g0582500	1.68333	4.56	1.43771	3.91028e-07	4.6047e-06	Up	Similar to Proton myo-inositol cotransporter.
MSTRG.16906	0.373333	2.14667	2.52356	3.95903e-07	4.65012e-06	Up	--
Os12g0527500	0.81	3.04	1.90808	3.96787e-07	4.65707e-06	Up	Cyclin-like F-box domain containing protein.
Os08g0414500	4.46667	20.3867	2.19036	4.12442e-07	4.82133e-06	Up	Hypothetical conserved gene.
Os02g0673000	3.47667	7.89667	1.18354	4.18592e-07	4.88251e-06	Up	Uncharacterised protein family UPF0005 domain containing protein.
Os02g0139000	19.1533	77.3167	2.01318	4.45658e-07	5.16989e-06	Up	Transcription factor Regulation of Pi signaling and homeostasis Tolerance to low-Pi stress
MSTRG.17307	0.676667	2.19	1.69441	4.52694e-07	5.24389e-06	Up	PREDICTED: proline-rich receptor-like protein kinase PERK8 [Oryza sativa Japonica Group]
Os09g0326100	0.00666667	0.366667	5.78136	4.53477e-07	5.24916e-06	Up	Protein kinase core domain containing protein.
Os04g0680400	2.27	6.37333	1.48936	4.53989e-07	5.2517e-06	Up	Allantoinase (EC:3.5.2.5) Ureide metabolism Nitrogen molecular sensor
MSTRG.6443	5.53667	26.9433	2.28284	4.5604e-07	5.27119e-06	Up	PREDICTED: probable glutathione S-transferase GSTU6 [Oryza sativa Japonica Group]
Os02g0264700	3.8	7.71	1.02073	4.56807e-07	5.27624e-06	Up	Similar to flagelliform silk protein-like protein [Oryza sativa (japonica cultivar-group)].
Os02g0112900	0.53	15.78	4.89596	4.73482e-07	5.45504e-06	Up	Similar to Viroid RNA-binding protein (Fragment).
Os09g0133000	7.51667	18.4633	1.2965	4.74885e-07	5.46725e-06	Up	SWIB/MDM2 domain containing protein.
Os03g0700100	0.001	1.41667	10.4683	4.77738e-07	5.49614e-06	Up	Somatomedin B domain containing protein.
Os01g0117900	0.98	4.00333	2.03035	4.78692e-07	5.50513e-06	Up	Similar to nodulin-like protein.
Os03g0804700	0.001	1.09	10.0901	5.0593e-07	5.79958e-06	Up	Germin-like protein 3-8.
Os02g0494400	3.43667	8.84667	1.36412	5.17902e-07	5.92619e-06	Up	Similar to TPR Domain containing protein expressed.
Os05g0577000	5.12	14.8767	1.53884	5.20006e-07	5.94814e-06	Up	Hypothetical gene.
Os01g0920700	9.50667	23.0133	1.27546	5.24159e-07	5.99135e-06	Up	Nucleotide-diphospho-sugar transferase domain containing protein.
MSTRG.1941	0.446667	2.5	2.48466	5.25543e-07	6.00503e-06	Up	membrane-associated protein-like [Oryza sativa Japonica Group]
Os12g0565800	0.276667	1.99667	2.85137	5.35437e-07	6.11151e-06	Up	Conserved hypothetical protein.
Os10g0154500	0.83	3.97333	2.25917	5.4061e-07	6.16176e-06	Up	Similar to cDNA clone: J075187A19 full insert sequence.
Os04g0589200	4.39	12.4033	1.49844	5.48739e-07	6.24328e-06	Up	Heat shock protein DnaJ cysteine-rich region domain containing protein.
Os11g0198200	5.78	14.23	1.29979	5.51437e-07	6.2695e-06	Up	Conserved hypothetical protein.
Os03g0233900	117.717	405.793	1.78543	5.54266e-07	6.29687e-06	Up	Non-symbiotic hemoglobin 1 (rHb1) (ORYsa GLB1a).
Os04g0609600	27.7433	62.79	1.17839	5.54435e-07	6.29687e-06	Up	Similar to Protein phosphatase type 2C.
Os05g0545300	0.843333	2.85	1.75679	5.58046e-07	6.33563e-06	Up	Serine/threonine protein kinase domain containing protein.
MSTRG.19215	0.176667	3.55333	4.33007	5.59031e-07	6.34231e-06	Up	--
Os03g0103400	1.95667	4.35	1.15262	5.61303e-07	6.36582e-06	Up	GRAS transcription factor domain containing protein.
Os01g0930400	0.453333	2.6	2.51987	5.73467e-07	6.48477e-06	Up	Potassium transporter High-affinity K acquisition Root-to-shoot K transport K-regulated salt tolerance
MSTRG.1851	0.23	1.47333	2.67938	5.74517e-07	6.49033e-06	Up	--
Os03g0643250	0.963333	4.97667	2.36907	5.82126e-07	6.56735e-06	Up	Similar to Hydrolase-like protein.
Os11g0146500	3.85333	10.1967	1.40392	5.91388e-07	6.65739e-06	Up	SPla/RYanodine receptor SPRY domain containing protein.
Os08g0538100	2.4	8.55	1.83289	5.92664e-07	6.6694e-06	Up	Hypothetical gene.
MSTRG.19709	0.001	0.423333	8.72565	5.9574e-07	6.69694e-06	Up	--
Os08g0268000	32.16	69.2633	1.10682	5.98334e-07	6.72152e-06	Up	Conserved hypothetical protein.
Os03g0793000	7.66	17.1067	1.15914	5.98347e-07	6.72152e-06	Up	Zinc finger AN1-type domain containing protein.
Os09g0491596	0.54	3.33333	2.62593	6.02679e-07	6.7678e-06	Up	Conserved hypothetical protein.
Os01g0934900	0.193333	2.72333	3.81621	6.21231e-07	6.95901e-06	Up	Probable esterase PIR7A.
Os09g0321900	12.5667	31.65	1.3326	6.22428e-07	6.96997e-06	Up	Similar to Ubiquitin-conjugating enzyme E2 M (EC 6.3.2.19) (Ubiquitin-protein ligase M) (Ubiquitin carrier protein M) (Nedd8-conjugating enzyme Ubc12).
Os07g0200500	1.34667	3.56667	1.40518	6.23007e-07	6.97401e-06	Up	Similar to OSIGBa0126B18.3 protein.
Os04g0648400	0.666667	1.84667	1.46989	6.34516e-07	7.09787e-06	Up	Similar to H0811D08.17 protein.
MSTRG.19602	0.17	1.22	2.84327	6.40184e-07	7.15126e-06	Up	--
Os07g0546700	362.043	793.367	1.13183	6.422e-07	7.17128e-06	Up	Similar to 60S ribosomal protein L38.
Os03g0734200	6.95667	19.8567	1.51316	6.46371e-07	7.20777e-06	Up	Conserved hypothetical protein.
Os09g0515550	0.683333	6.79333	3.31346	6.4818e-07	7.2229e-06	Up	Hypothetical protein.
Os12g0148600	1.33667	3.88667	1.53989	6.51717e-07	7.25978e-06	Up	Conserved hypothetical protein.
Os07g0684900	4.40333	11.33	1.36348	6.56271e-07	7.30542e-06	Up	WUSCHEL-related homeobox protein Transcription factor Crown root development
Os02g0804800	2.9	6.2	1.09622	6.58059e-07	7.32277e-06	Up	Conserved hypothetical protein.
Os03g0201000	0.263333	1.36667	2.3757	6.63895e-07	7.38e-06	Up	Conserved hypothetical protein.
Os01g0661601	6.01667	18.08	1.58736	6.81257e-07	7.54936e-06	Up	Hypothetical gene.
MSTRG.31753	1.56667	5.41667	1.78971	6.87892e-07	7.6176e-06	Up	--
Os10g0559833	0.336667	1.52	2.17468	7.16781e-07	7.92927e-06	Up	Hypothetical protein.
Os06g0207200	3.79667	12.4233	1.71025	7.57273e-07	8.31958e-06	Up	Conserved hypothetical protein.
MSTRG.25111	0.0566667	0.943333	4.0572	7.82271e-07	8.5677e-06	Up	--
Os01g0225000	0.343333	2.48333	2.8546	7.85918e-07	8.60175e-06	Up	Mitochondrial carrier protein domain containing protein.
Os09g0472100	54.9167	152.577	1.47422	7.86421e-07	8.6043e-06	Up	Similar to ABC transporter.
MSTRG.34791	0.04	1.09	4.76818	7.87606e-07	8.61432e-06	Up	PREDICTED: ervatamin-B-like [Oryza sativa Japonica Group]
Os01g0566500	0.6	2.59	2.10992	7.92634e-07	8.66339e-06	Up	Similar to Dioxygenase RAMOSUS1.
Os03g0176800	0.323333	2.05333	2.66687	7.9775e-07	8.70441e-06	Up	Domain of unknown function DUF1618 domain containing protein.
Os06g0639600	5.82333	11.72	1.00906	8.07264e-07	8.79921e-06	Up	Similar to Elongator component.
Os12g0100700	1.05667	3.52	1.73606	8.20042e-07	8.92934e-06	Up	Similar to Exo70 exocyst complex subunit family protein.
Os03g0809800	5.12333	10.9033	1.08961	8.25416e-07	8.97869e-06	Up	Conserved hypothetical protein.
Os09g0559600	1.34	4.64	1.79189	8.2964e-07	9.02156e-06	Up	Thioredoxin domain 2 containing protein.
Os08g0227200	5.23	12.02	1.20055	8.36572e-07	9.09075e-06	Up	Kelch related domain containing protein.
Os01g0782200	14.8233	44.5133	1.58637	8.37362e-07	9.09624e-06	Up	Diacylglycerol kinase catalytic region domain containing protein.
Os01g0833400	21.4	45.5833	1.0909	8.41541e-07	9.13542e-06	Up	Conserved hypothetical protein.
Os09g0409000	13.7833	35.3267	1.35783	8.46129e-07	9.17588e-06	Up	Conserved hypothetical protein.
Os06g0223700	14.4667	31.6433	1.12917	8.61095e-07	9.31919e-06	Up	Protein of unknown function DUF581 family protein.
Os02g0271000	0.2	1.04333	2.38313	8.69388e-07	9.39304e-06	Up	Similar to Subtilase.
Os04g0417000	0.001	0.393333	8.61961	8.70069e-07	9.39404e-06	Up	Similar to Aluminum-activated malate transporter.
Os07g0459500	0.273333	1.38667	2.34289	8.88302e-07	9.5715e-06	Up	F-box domain Skp2-like domain containing protein.
Os04g0534801	9.46667	21.3133	1.17083	9.0643e-07	9.7471e-06	Up	Conserved hypothetical protein.
Os08g0557000	26.4333	54.64	1.0476	9.06904e-07	9.74811e-06	Up	L-isoaspartate methyltransferase iso-Asp-containing protein repairing enzyme Seed vigor and longevity
MSTRG.13537	0.636667	3.12333	2.29448	9.07134e-07	9.74811e-06	Up	--
Os11g0604500	0.54	3.02333	2.48511	9.12238e-07	9.79307e-06	Up	Conserved hypothetical protein.
Os09g0381300	3.08667	7.38	1.25757	9.14381e-07	9.81278e-06	Up	Pyridoxal phosphate-dependent transferase major region subdomain 1 domain containing protein.
Os08g0136300	0.001	16.0433	13.9697	9.27004e-07	9.92823e-06	Up	Similar to (clone wusl1032) mRNA sequence.
Os04g0528400	2.89333	6.35	1.13402	9.30184e-07	9.95896e-06	Up	Similar to ABC transporter.
Os03g0241900	13.1267	27.0833	1.0449	9.4613e-07	1.01161e-05	Up	Similar to Senescence-associated protein 12.
Os03g0304400	3.67333	8.15333	1.1503	9.49359e-07	1.01439e-05	Up	Zinc finger RING/FYVE/PHD-type domain containing protein.
Os03g0266300	13.7933	55.6633	2.01276	9.52743e-07	1.01698e-05	Up	Class I low-molecular-weight heat shock protein 17.9.
Os11g0126900	7.18	27.26	1.92473	9.56321e-07	1.02046e-05	Up	NAC-domain protein Drought tolerance
Os01g0187000	1.52667	4.63333	1.60167	9.69943e-07	1.03327e-05	Up	Conserved hypothetical protein.
MSTRG.19603	0.0966667	0.84	3.1193	9.8929e-07	1.05212e-05	Up	cell wall protein-like [Oryza sativa Japonica Group]
Os01g0327100	96.4167	231.643	1.26455	9.92137e-07	1.05416e-05	Up	Haem peroxidase family protein.
Os04g0402200	0.0166667	0.456667	4.7761	1.00317e-06	1.06476e-05	Up	Similar to RNA binding protein Rp120.
Os03g0259900	11.7533	25.9867	1.1447	1.01899e-06	1.08011e-05	Up	Protein of unknown function DUF593 family protein.
Os06g0727300	0.226667	1.14	2.33039	1.02199e-06	1.08222e-05	Up	Similar to glycosyltransferase family GT8.
Os05g0319875	0.0666667	1.48333	4.47573	1.02473e-06	1.08476e-05	Up	Hypothetical protein.
Os07g0673200	10.8533	42.4467	1.96751	1.02853e-06	1.08807e-05	Up	RING-type E3 ubiquitin-ligase Maintenance of phosphate homeostasis via degradation of phosphate transporters
Os03g0842501	7.06333	17.8233	1.33535	1.04558e-06	1.10318e-05	Up	Hypothetical conserved gene.
Os05g0460000	20.39	44.71	1.13274	1.04747e-06	1.10481e-05	Up	Similar to 70 kDa heat shock cognate protein 1.
Os05g0233000	0.793333	2.57	1.69577	1.04963e-06	1.10671e-05	Up	Conserved hypothetical protein.
Os07g0684000	2.64333	14.35	2.44062	1.06474e-06	1.12007e-05	Up	Ricin B-related lectin domain containing protein.
Os10g0156300	9.50333	25.84	1.4431	1.07377e-06	1.12882e-05	Up	Hypothetical conserved gene.
Os02g0537200	2.67333	6.77	1.34052	1.09292e-06	1.14668e-05	Up	Cyclin-like F-box domain containing protein.
Os07g0196300	5.46	16.6033	1.6045	1.09567e-06	1.14919e-05	Up	Cyclin-like F-box domain containing protein.
Os04g0193300	0.616667	1.96	1.66829	1.1077e-06	1.16029e-05	Up	Cyclin-like F-box domain containing protein.
Os02g0253700	2.11	11.61	2.46005	1.12381e-06	1.17563e-05	Up	Conserved hypothetical protein.
Os05g0380900	2.75667	9.51	1.78652	1.13507e-06	1.18624e-05	Up	Similar to Polcalcin Jun o 2 (Calcium-binding pollen allergen Jun o 2).
Os10g0552400	6.97	17.97	1.36636	1.14712e-06	1.19739e-05	Up	Zinc finger RING/FYVE/PHD-type domain containing protein.
Os01g0710250	1.90667	4.84	1.34395	1.14724e-06	1.19739e-05	Up	Hypothetical conserved gene.
Os11g0602800	14.2167	32.1933	1.17918	1.1914e-06	1.2387e-05	Up	Galactose oxidase/kelch beta-propeller domain containing protein.
Os03g0701600	38.58	79.5967	1.04485	1.20097e-06	1.24719e-05	Up	Conserved hypothetical protein.
Os03g0781300	9.02	23.83	1.40158	1.20637e-06	1.25214e-05	Up	Conserved hypothetical protein.
Os07g0668700	3.03667	13.7433	2.17817	1.21093e-06	1.25648e-05	Up	Lipase class 3 family protein.
Os04g0634800	5.93	24.2767	2.03347	1.21327e-06	1.25849e-05	Up	Similar to H0315F07.8 protein.
Os05g0506500	0.001	0.943333	9.88162	1.22256e-06	1.26731e-05	Up	Conserved hypothetical protein.
MSTRG.8091	0.0166667	0.633333	5.24793	1.23226e-06	1.27694e-05	Up	BKRF1 encodes EBNA-1 protein-like [Oryza sativa Japonica Group]
Os06g0713800	3.07667	8.71667	1.50241	1.24369e-06	1.28795e-05	Up	Alpha-amylase isozyme 2A precursor (EC 3.2.1.1) (1 4-alpha-D-glucan glucanohydrolase).
Os03g0714100	0.001	0.656667	9.35902	1.25195e-06	1.29525e-05	Up	Conserved hypothetical protein.
Os05g0151700	0.893333	3.28	1.87643	1.25563e-06	1.29822e-05	Up	Conserved hypothetical protein.
Os04g0259150	0.126667	2.68	4.40312	1.26114e-06	1.30265e-05	Up	Conserved hypothetical protein.
MSTRG.8672	0.2	2.87	3.84298	1.26599e-06	1.30724e-05	Up	MATH domain containing protein [Oryza sativa Japonica Group]
Os04g0414000	2.35	5.35333	1.18778	1.2685e-06	1.30941e-05	Up	Similar to OSIGBa0134P10.12 protein.
Os10g0542400	2.03667	6.69333	1.71651	1.29924e-06	1.33854e-05	Up	Expansin/Lol pI family protein.
Os04g0204000	0.001	0.433333	8.75933	1.31026e-06	1.34772e-05	Up	Similar to H0825G02.2 protein.
Os12g0245000	5.93333	20.6433	1.79876	1.33132e-06	1.3685e-05	Up	Conserved hypothetical protein.
Os01g0201100	14.4933	30.3367	1.06567	1.3396e-06	1.37614e-05	Up	Similar to xylosyltransferase oxt.
Os02g0212300	2.98333	7.50667	1.33125	1.33961e-06	1.37614e-05	Up	Conserved hypothetical protein.
Os10g0120300	0.433333	1.45	1.7425	1.34301e-06	1.37919e-05	Up	Similar to Leucine Rich Repeat family protein expressed.
Os01g0925400	29.9867	74.12	1.30554	1.3674e-06	1.40157e-05	Up	No apical meristem (NAM) protein domain containing protein.
Os05g0421450	0.526667	3.8	2.85104	1.36823e-06	1.40193e-05	Up	Hypothetical protein.
Os01g0718500	2.24333	8.44	1.9116	1.39072e-06	1.42105e-05	Up	Protein of unknown function DUF1070 domain containing protein.
Os01g0182100	5.10667	11.0533	1.11403	1.3909e-06	1.42105e-05	Up	Protein of unknown function DUF1618 domain containing protein.
Os05g0469812	0.001	0.31	8.27612	1.39567e-06	1.42479e-05	Up	Hypothetical protein.
Os05g0116500	1.00333	2.35667	1.23195	1.40116e-06	1.42879e-05	Up	Conserved hypothetical protein.
MSTRG.17427	0.426667	2.35333	2.46352	1.41586e-06	1.44287e-05	Up	cell wall protein-like [Oryza sativa Japonica Group]
Os03g0810700	1.66333	7.79	2.22755	1.44427e-06	1.47041e-05	Up	Similar to Mitochondrial Rho GTPase.
Os11g0576975	4.69333	15.56	1.72916	1.44586e-06	1.47157e-05	Up	Hypothetical conserved gene.
Os07g0249900	1.05667	6.88667	2.70429	1.44803e-06	1.47284e-05	Up	Peptidase M20 family protein.
Os08g0559700	4.94333	11.82	1.25767	1.46151e-06	1.4856e-05	Up	Protein of unknown function DUF3245 domain containing protein.
Os12g0528100	3.77667	8.53667	1.17656	1.46537e-06	1.48857e-05	Up	Armadillo-like helical domain containing protein.
Os02g0514150	0.263333	2.65333	3.33284	1.47534e-06	1.49823e-05	Up	Hypothetical conserved gene.
Os01g0959100	2.81667	9.93667	1.81877	1.49892e-06	1.52024e-05	Up	Similar to Abscisic stress ripening protein 1.
Os12g0497300	0.873333	3.66667	2.06986	1.54099e-06	1.56043e-05	Up	DNA repair protein RAD51 Homologous pairing DNA double strand break (DSB) repair and homologous recombination
Os03g0341000	7.89	23.2533	1.55934	1.58969e-06	1.60619e-05	Up	Similar to AP2 domain containing protein RAP2.2 (Fragment).
MSTRG.23424	0.336667	1.65333	2.29598	1.59773e-06	1.61359e-05	Up	PREDICTED: proline-rich receptor-like protein kinase PERK8 [Oryza sativa Japonica Group]
Os02g0259900	1.06667	3.06667	1.52356	1.59804e-06	1.61359e-05	Up	Conserved hypothetical protein.
Os12g0149800	30.4033	63.6567	1.06608	1.60394e-06	1.61853e-05	Up	Similar to G10.
Os04g0112100	1.47	4.42667	1.5904	1.61344e-06	1.62709e-05	Up	NB-ARC domain containing protein.
Os03g0561400	0.0933333	1.12	3.58496	1.63616e-06	1.6474e-05	Up	Conserved hypothetical protein.
Os08g0325134	0.0433333	0.926667	4.4185	1.64291e-06	1.65315e-05	Up	Putative B3 domain-containing protein Os08g0325100.
Os10g0456800	14.9533	43.5333	1.54165	1.64749e-06	1.65672e-05	Up	CHY zinc finger protein Transcriptional co-activator of DST (Drought and Salt Tolerance: zinc finger transcription factor gene) Drought and salt tolerance Stomatal aperture control
Os08g0505300	53.63	109.23	1.02626	1.70308e-06	1.70833e-05	Up	Similar to 60S ribosomal protein L31.
MSTRG.1830	0.19	1.20667	2.66696	1.7835e-06	1.78283e-05	Up	--
Os02g0568600	1.49333	5.32	1.83289	1.79042e-06	1.78919e-05	Up	Hypothetical conserved gene.
Os07g0185700	4.14667	8.35667	1.01098	1.79631e-06	1.79395e-05	Up	Conserved hypothetical protein.
Os01g0872900	0.001	0.38	8.56986	1.80379e-06	1.80086e-05	Up	Protein of unknown function DUF635 family protein.
Os02g0672500	0.0566667	0.506667	3.16046	1.8193e-06	1.81521e-05	Up	Similar to Mitochondrial import inner membrane translocase subunit tim23.
Os09g0451000	4.78667	12.9	1.43028	1.83176e-06	1.8265e-05	Up	ACC oxidase Ethylene biosynthesis
Os08g0201100	7.33	41.4533	2.4996	1.88039e-06	1.8709e-05	Up	Conserved hypothetical protein.
Os03g0836600	0.476667	1.65333	1.79432	1.99257e-06	1.97391e-05	Up	Similar to OSIGBa0117N13.1 protein.
Os03g0845700	16.31	35.0567	1.10393	2.00584e-06	1.98582e-05	Up	Similar to RPB17 (Fragment).
Os02g0159900	0.923333	3.01667	1.70803	2.01025e-06	1.98957e-05	Up	SKD1 protein (Vacuolar sorting protein 4b).
Os03g0314400	1.44	3.10333	1.10775	2.02879e-06	2.00536e-05	Up	Pentatricopeptide repeat domain containing protein.
Os03g0818400	109.42	239.813	1.13204	2.0458e-06	2.021e-05	Up	Similar to 40S ribosomal protein S23 (S12).
Os04g0560100	2.14333	5.18333	1.27402	2.05664e-06	2.03108e-05	Up	Cytochrome P450 family protein.
Os03g0571700	0.713333	2.86667	2.00673	2.09572e-06	2.06648e-05	Up	Similar to TRANSPARENT TESTA 12 protein.
Os03g0608700	5.35667	16.5267	1.62539	2.11122e-06	2.07856e-05	Up	Similar to 10A19I.15.
Os11g0302900	2.58	5.46	1.08153	2.13422e-06	2.09861e-05	Up	Similar to OSIGBa0136O08-OSIGBa0153H12.6 protein.
Os09g0243200	0.97	5.43333	2.48578	2.13917e-06	2.10219e-05	Up	Zinc finger RING/FYVE/PHD-type domain containing protein.
Os11g0242200	1.61	5.40333	1.74679	2.2553e-06	2.20884e-05	Up	Protein phosphatase 2C-like domain containing protein.
Os12g0145400	11.2267	24.79	1.14283	2.25697e-06	2.20979e-05	Up	Protein of unknown function DUF231 plant domain containing protein.
Os01g0920500	37.2033	81.6333	1.13373	2.26629e-06	2.21756e-05	Up	Nucleotide-diphospho-sugar transferase domain containing protein.
Os06g0104200	0.9	2.68333	1.57603	2.3116e-06	2.25913e-05	Up	Similar to OsNAC7 protein.
Os06g0192100	1.8	5.93667	1.72166	2.31954e-06	2.26481e-05	Up	Similar to UDP-glucose flavonoid-3-O-glucosyltransferase.
Os02g0225900	0.886667	3.03667	1.77602	2.35983e-06	2.30204e-05	Up	Conserved hypothetical protein.
Os06g0147400	101.33	289.67	1.51535	2.38238e-06	2.3212e-05	Up	Conserved hypothetical protein.
Os10g0506000	0.95	2.52333	1.40933	2.3881e-06	2.32535e-05	Up	Pentatricopeptide repeat containing protein.
Os02g0232100	4.81	9.62333	1.0005	2.40114e-06	2.33734e-05	Up	Zinc finger RING/FYVE/PHD-type domain containing protein.
MSTRG.23410	0.1	0.783333	2.96963	2.40239e-06	2.33785e-05	Up	--
Os01g0813100	2.42	6.42667	1.40906	2.40909e-06	2.34365e-05	Up	bZIP transcription factor Modulation of the floral transition Floral repressor
Os02g0168100	21.01	46.55	1.14771	2.43518e-06	2.36543e-05	Up	Similar to 4-hydroxyphenylpyruvate dioxygenase.
MSTRG.33430	0.04	0.64	4	2.45026e-06	2.37792e-05	Up	BKRF1 encodes EBNA-1 protein-like [Oryza sativa Japonica Group]
Os01g0742400	1.95333	4.46	1.19111	2.49356e-06	2.417e-05	Up	Hypothetical conserved gene.
Os07g0537400	0.446667	1.79333	2.00537	2.53174e-06	2.44955e-05	Up	Similar to receptor-like serine-threonine protein kinase.
Os10g0101200	8.21667	21.6933	1.40063	2.5428e-06	2.45616e-05	Up	Serine carboxypeptidase Regulation of grain filling and seed germination
Os02g0467200	43.11	87.3867	1.01939	2.54319e-06	2.45616e-05	Up	Hypothetical protein.
Os03g0183900	0.0566667	0.613333	3.4361	2.58191e-06	2.49046e-05	Up	Similar to Plasma membrane H+-ATPase.
Os12g0163600	2.55667	5.27	1.04354	2.58261e-06	2.49046e-05	Up	Pentatricopeptide repeat domain containing protein.
Os12g0136300	0.226667	1.07	2.23897	2.63335e-06	2.53633e-05	Up	Hypothetical protein.
Os12g0128000	0.793333	2.26	1.51032	2.67465e-06	2.57223e-05	Up	Cyclin-like F-box domain containing protein.
Os03g0217000	1.33333	5.2	1.96347	2.74947e-06	2.63784e-05	Up	Similar to Inhibin beta B chain precursor (Activin beta-B chain).
MSTRG.8062	0.0466667	1.39667	4.90345	2.76022e-06	2.64577e-05	Up	--
Os10g0419400	25.9067	84.7967	1.71068	2.76395e-06	2.64732e-05	Up	Similar to SIPL.
Os07g0199000	1.30333	3.37333	1.37197	2.76432e-06	2.64732e-05	Up	Similar to OSIGBa0126B18.3 protein.
Os02g0591800	41.7067	84.79	1.02362	2.77841e-06	2.65683e-05	Up	Brix domain containing protein.
Os12g0562700	0.566667	1.28	1.17557	2.87337e-06	2.74271e-05	Up	Hypothetical conserved gene.
Os12g0410150	1.63	4.05	1.31305	2.90515e-06	2.76973e-05	Up	Hypothetical gene.
Os01g0556650	1.07	5.04	2.23581	2.92217e-06	2.78513e-05	Up	Hypothetical protein.
Os10g0471000	0.596667	2.11333	1.82452	2.93798e-06	2.79853e-05	Up	Protein of unknown function DUF810 domain containing protein.
Os05g0585700	2.76333	9.78	1.82342	2.9649e-06	2.82165e-05	Up	Helix-turn-helix AraC type subdomain 2 domain containing protein.
Os01g0233800	0.0966667	0.686667	2.82852	2.97385e-06	2.82763e-05	Up	Similar to Viroid symptom modulation protein.
Os01g0661500	21.87	47.9633	1.13298	3.01917e-06	2.86817e-05	Up	Mov34/MPN/PAD-1 family protein.
Os01g0841700	18.5433	64.45	1.79728	3.02319e-06	2.87028e-05	Up	Similar to Isoform ERG1b of Elicitor-responsive protein 1.
Os01g0711800	0.001	0.66	9.36632	3.06938e-06	2.91067e-05	Up	Nucleosome assembly protein (NAP) family protein.
Os02g0186800	3.57	10.7033	1.58406	3.13757e-06	2.96829e-05	Up	Cytochrome P450 family protein.
Os04g0617900	28.6933	127.3	2.14944	3.24015e-06	3.05718e-05	Up	Similar to germin-like protein subfamily 1 member 11.
Os10g0416800	50.1933	119.04	1.24588	3.32101e-06	3.12517e-05	Up	Similar to Chitinase 2 (EC 3.2.1.14) (Tulip bulb chitinase-2) (TBC-2).
MSTRG.33747	1.49333	4.43	1.56877	3.3431e-06	3.14318e-05	Up	--
Os02g0540700	2.56667	6.31667	1.29927	3.35257e-06	3.15023e-05	Up	Similar to Arm repeat-containing protein.
Os01g0156300	0.163333	2.21667	3.7625	3.39153e-06	3.18216e-05	Up	Similar to Cappuccino protein.
Os02g0813350	16.6133	39.78	1.2597	3.45368e-06	3.23288e-05	Up	Cyclin-like F-box domain containing protein.
MSTRG.6191	1.01	3.74	1.88868	3.47725e-06	3.25113e-05	Up	PREDICTED: polyubiquitin-like [Oryza sativa Japonica Group]
Os05g0166525	0.001	0.313333	8.29155	3.49609e-06	3.26779e-05	Up	Hypothetical protein.
Os09g0451133	1.47	5.32333	1.85651	3.60226e-06	3.35427e-05	Up	Hypothetical gene.
Os08g0282200	2.10333	4.23	1.00798	3.62649e-06	3.3729e-05	Up	Hypothetical protein.
Os02g0833600	8.47333	17.2333	1.0242	3.6547e-06	3.39519e-05	Up	Similar to Basic leucine zipper transcription factor (Fragment).
Os01g0726001	18.2267	38.5233	1.07968	3.66199e-06	3.39997e-05	Up	Hypothetical gene.
Os03g0661900	0.443333	1.73667	1.96986	3.76738e-06	3.49073e-05	Up	Peptidase trypsin-like serine and cysteine domain containing protein.
Os04g0560600	1.51333	3.84667	1.34588	3.77381e-06	3.49567e-05	Up	Calcium-dependent protein kinase Salt-stress tolerance Blast disease resistance
Os01g0801100	4.57	9.15667	1.00263	3.79127e-06	3.50981e-05	Up	Similar to Apurinic endonuclease-redox protein (DNA-(apurinic or apyrimidinic site) lyase) (EC 4.2.99.18).
Os06g0133500	7.03	22.13	1.65441	3.89757e-06	3.5978e-05	Up	Conserved hypothetical protein.
Os01g0648700	1.41667	3.84667	1.44111	3.91545e-06	3.61116e-05	Up	Bromodomain containing protein.
Os05g0207200	0.456667	1.51667	1.73169	3.92181e-06	3.61599e-05	Up	Similar to rf1 protein.
Os11g0460500	0.303333	1.49667	2.30278	4.0976e-06	3.7607e-05	Up	Conserved hypothetical protein.
Os02g0491600	0.463333	2.87333	2.6326	4.11124e-06	3.77214e-05	Up	Similar to Oxalate oxidase-like protein or germin-like protein (Germin-like 8) (Germin-like 12).
Os03g0305400	0.786667	6.77	3.10533	4.17538e-06	3.81893e-05	Up	UspA domain containing protein.
Os03g0615300	0.1	0.493333	2.30256	4.18275e-06	3.82316e-05	Up	Protein of unknown function DUF1618 domain containing protein.
Os09g0360900	2.91	6.40667	1.13855	4.1836e-06	3.82316e-05	Up	Conserved hypothetical protein.
Os04g0184100	1.40333	4.60333	1.71382	4.26103e-06	3.88909e-05	Up	Similar to OSIGBa0140C02.7 protein.
Os02g0163300	5.44667	11.8667	1.12347	4.26183e-06	3.88909e-05	Up	Conserved hypothetical protein.
Os04g0488700	17.9033	42.7667	1.25626	4.40994e-06	4.0105e-05	Up	Similar to PHY3.
Os05g0188800	5.53667	11.1967	1.01598	4.50402e-06	4.08087e-05	Up	Similar to H0403D02.13 protein.
Os03g0849700	0.876667	1.89	1.10829	4.53837e-06	4.10626e-05	Up	Hypothetical conserved gene.
Os05g0128000	2.33667	6.16667	1.40004	4.57706e-06	4.14008e-05	Up	Homeodomain-like containing protein.
Os06g0168500	46.2833	94.0467	1.02288	4.62654e-06	4.18011e-05	Up	Similar to Syntaxin-like protein (Fragment).
Os01g0303800	7.52667	18.2233	1.2757	4.66344e-06	4.20869e-05	Up	UspA domain containing protein.
Os01g0879500	3.54	7.40333	1.06443	4.84019e-06	4.351e-05	Up	RuBisCO-cytochrome methylase RMS1 domain containing protein.
MSTRG.31311	0.15	1.47667	3.29931	4.85159e-06	4.36002e-05	Up	PREDICTED: protein CHROMATIN REMODELING 8 [Oryza sativa Japonica Group]
Os01g0128100	0.2	0.96	2.26303	4.91772e-06	4.41324e-05	Up	Similar to Bifunctional nuclease (Fragment).
Os07g0646400	0.12	0.716667	2.57827	4.92152e-06	4.41541e-05	Up	Conserved hypothetical protein.
Os05g0421600	0.466667	2.45	2.39232	4.95249e-06	4.43697e-05	Up	No apical meristem (NAM) protein domain containing protein.
Os09g0463300	3.57667	9.31333	1.38068	4.9612e-06	4.44352e-05	Up	Domain of unknown function DUF547 domain containing protein.
Os05g0500600	0.843333	3.19	1.91938	4.96387e-06	4.44467e-05	Up	GRAS transcription factor domain containing protein.
Os04g0479100	11.9733	25.7233	1.10325	5.07135e-06	4.53021e-05	Up	Similar to OSIGBa0116M22.10 protein.
Os04g0146800	16.9767	36.1367	1.08991	5.1869e-06	4.62062e-05	Up	Similar to SDP1 (SUGAR-DEPENDENT1)%3B triacylglycerol lipase.
MSTRG.10024	0.0233333	0.88	5.23704	5.18785e-06	4.62062e-05	Up	BKRF1 encodes EBNA-1 protein-like [Oryza sativa Japonica Group]
MSTRG.21967	0.0166667	0.76	5.51096	5.19816e-06	4.62851e-05	Up	--
Os01g0170700	1.03333	2.48333	1.26497	5.20553e-06	4.63378e-05	Up	Thiol-activated cytolysin family protein.
Os06g0148600	1.44	3.46	1.2647	5.25712e-06	4.67587e-05	Up	Cyclin-like F-box domain containing protein.
Os03g0355500	1.22	3.93333	1.68887	5.28679e-06	4.69695e-05	Up	Conserved hypothetical protein.
Os05g0517800	13.5033	32.1033	1.24941	5.30799e-06	4.70924e-05	Up	Conserved hypothetical protein.
Os03g0716900	2.51333	6.81667	1.43946	5.38696e-06	4.77003e-05	Up	Hypothetical gene.
MSTRG.12523	0.143333	1.02667	2.84052	5.49883e-06	4.86639e-05	Up	cell wall protein-like [Oryza sativa Indica Group]
Os05g0536250	0.126667	0.916667	2.85536	5.54989e-06	4.90614e-05	Up	Similar to AP2 domain-containing transcription factor.
Os01g0157800	4.68667	10.96	1.22561	5.55215e-06	4.90678e-05	Up	Heat shock protein DnaJ N-terminal domain containing protein.
MSTRG.5408	0.09	0.73	3.0199	5.56615e-06	4.91779e-05	Up	BKRF1 encodes EBNA-1 protein-like [Oryza sativa Japonica Group]
Os06g0714800	7.02333	18.7	1.41281	5.61425e-06	4.95004e-05	Up	Protein of unknown function DUF581 family protein.
Os04g0650700	62.7967	193.84	1.62611	5.64712e-06	4.97557e-05	Up	Similar to OSIGBa0113E10.3 protein.
Os01g0587500	0.72	5.6	2.95936	5.66549e-06	4.99038e-05	Up	Heat shock protein Hsp20 domain containing protein.
Os02g0630250	0.496667	3.50333	2.81838	5.74164e-06	5.0505e-05	Up	Similar to predicted protein.
MSTRG.8298	2.61667	6.19333	1.24299	5.7587e-06	5.06411e-05	Up	--
Os01g0764700	3.95	8.48	1.10221	5.83495e-06	5.12448e-05	Up	Resolvase holliday junction-type YqgF-like domain containing protein.
Os02g0736400	58.5033	123.86	1.08212	5.83537e-06	5.12448e-05	Up	Aldolase-type TIM barrel domain containing protein.
MSTRG.22936	0.03	55.25	10.8468	5.85636e-06	5.13922e-05	Up	--
Os06g0264650	36.6833	92.0033	1.32656	5.88068e-06	5.15718e-05	Up	Hypothetical conserved gene.
Os07g0648566	7.41333	15.8433	1.09568	5.94307e-06	5.20618e-05	Up	Hypothetical gene.
Os11g0209100	0.866667	2.11667	1.28824	5.97448e-06	5.23101e-05	Up	Cyclin-like F-box domain containing protein.
Os05g0310600	9.22	19.5167	1.08187	5.97469e-06	5.23101e-05	Up	NC domain containing protein.
Os08g0296900	11.08	23.67	1.0951	5.99766e-06	5.24824e-05	Up	Tetratricopeptide-like helical domain containing protein.
Os03g0745600	1.14	3.88333	1.76826	6.1522e-06	5.37611e-05	Up	Uncharacterised protein family UPF0005 domain containing protein.
Os11g0106700	4.61667	14.3	1.63109	6.15484e-06	5.37694e-05	Up	Similar to Ferritin 1 chloroplast precursor (EC 1.16.3.1) (ZmFer1).
Os12g0639200	44.08	88.9767	1.0133	6.27113e-06	5.47106e-05	Up	Similar to ATPase 3.
Os06g0695500	89.5267	237.293	1.40628	6.61325e-06	5.73975e-05	Up	Similar to Peroxidase 16 precursor (EC 1.11.1.7) (Atperox P16) (ATP22a).
Os02g0738100	3.19333	14.0333	2.13572	6.6696e-06	5.78551e-05	Up	Conserved hypothetical protein.
Os01g0890200	0.001	0.276667	8.11201	6.70495e-06	5.80829e-05	Up	Similar to S-domain class receptor-like kinase3.
Os10g0427300	2.20333	4.63333	1.07236	6.72159e-06	5.82113e-05	Up	Similar to BTB/POZ domain containing protein expressed.
Os02g0313700	12.13	25.71	1.08375	6.79845e-06	5.8845e-05	Up	Similar to NTMC2T6.1/NTMC2TYPE6.1.
MSTRG.15058	0.001	0.563333	9.13785	6.97731e-06	6.01497e-05	Up	--
Os01g0571166	4.64333	20.6367	2.15198	7.0804e-06	6.09552e-05	Up	Similar to gibberellin responsive1.
Os01g0631500	3.56333	12.5167	1.81255	7.08435e-06	6.09728e-05	Up	Similar to Beta-1 3-glucanase-like protein.
Os01g0782300	1.45333	4.51	1.63376	7.18658e-06	6.17528e-05	Up	Conserved hypothetical protein.
Os05g0469701	0.001	0.256667	8.00375	7.22763e-06	6.20889e-05	Up	Hypothetical protein.
Os01g0578500	1.48	3.56667	1.26898	7.24475e-06	6.21857e-05	Up	F-box protein Indica-Japonica hybrid male sterility
Os02g0134100	3.99333	8.00667	1.00361	7.44648e-06	6.36607e-05	Up	Hypothetical gene.
Os11g0104240	0.24	1.45333	2.59826	7.53907e-06	6.44178e-05	Up	Similar to CsAtPR5.
Os06g0671000	0.756667	1.90333	1.3308	7.59303e-06	6.48269e-05	Up	Similar to Potassium transporter 1 (AtPOT1) (AtKUP1) (AtKT1).
Os03g0437200	4.57667	17.6067	1.94375	7.68503e-06	6.54745e-05	Up	C2H2-type zinc finger protein Abscisic acid-induced antioxidant defence Water stress and oxidative stress tolerance
MSTRG.2071	0.05	0.6	3.58496	7.68528e-06	6.54745e-05	Up	--
Os02g0555300	8.23667	18.8267	1.19265	8.12386e-06	6.87162e-05	Up	No apical meristem (NAM) protein domain containing protein.
Os05g0555600	0.366667	2.72	2.89107	8.13018e-06	6.87265e-05	Up	Similar to Glutamate synthase [NADH] amyloplastic.
Os04g0560700	49.8567	129.937	1.38195	8.18171e-06	6.9114e-05	Up	Conserved hypothetical protein.
Os01g0955100	14.45	48.9167	1.75926	8.25028e-06	6.96196e-05	Up	Similar to Calmodulin-like protein (Fragment).
Os05g0119200	52.55	118.233	1.16987	8.47536e-06	7.13233e-05	Up	Similar to EST C27893 corresponds to a region of the predicated gene.
MSTRG.25079	0.216667	0.763333	1.81684	8.47673e-06	7.13233e-05	Up	pr1-like protein [Oryza sativa Japonica Group]
Os07g0500300	36.6133	75.0233	1.03497	8.51199e-06	7.15864e-05	Up	C2 calcium-dependent membrane targeting domain containing protein.
Os11g0145200	0.193333	1.36	2.81444	8.51535e-06	7.15917e-05	Up	UDP-glucuronosyl/UDP-glucosyltransferase family protein.
Os03g0161500	4.72333	10.46	1.14701	8.53371e-06	7.17083e-05	Up	EGF domain containing protein.
Os09g0255200	0.51	8.65667	4.08524	8.62889e-06	7.24129e-05	Up	Putative cysteine proteinase inhibitor 11.
Os02g0799700	6.13	13.1133	1.09708	8.65268e-06	7.25744e-05	Up	Similar to serine-rich protein.
Os06g0645600	9.88667	22.5133	1.18722	8.69653e-06	7.29208e-05	Up	Hypothetical conserved gene.
Os06g0486300	1.36667	4.04333	1.56488	8.69855e-06	7.29208e-05	Up	Similar to MLO protein homolog 1.
MSTRG.19660	0.493333	1.33	1.43079	8.72949e-06	7.3161e-05	Up	--
Os11g0219400	0.173333	1.39333	3.00692	8.80015e-06	7.36952e-05	Up	Ankyrin repeat containing protein.
Os05g0205000	5.19667	11.8833	1.19328	8.85872e-06	7.40886e-05	Up	Similar to NOD26-like membrane integral protein ZmNIP1-1.
Os12g0119800	7.93	18.7967	1.24508	8.90203e-06	7.44119e-05	Up	Similar to Harpin-induced protein 1 containing protein expressed.
Os05g0583400	8.65667	30.3267	1.8087	8.92258e-06	7.45446e-05	Up	Similar to Mitochondrial import receptor subunit TOM7 (Translocase of outer membrane 7 kDa subunit).
Os01g0139600	1.06333	3.02667	1.50914	8.95217e-06	7.47428e-05	Up	Similar to Lipid phosphate phosphatase 2 (EC 3.1.3.-) (AtLPP2) (Phosphatidic acid phosphatase 2) (AtPAP2) (Prenyl diphosphate phosphatase).
Os02g0451900	2.92667	6.21333	1.08611	8.95566e-06	7.47428e-05	Up	Conserved hypothetical protein.
Os01g0593200	29.6433	59.9067	1.01501	9.06204e-06	7.55714e-05	Up	Protein of unknown function DUF581 family protein.
Os10g0372800	5.1	11.76	1.20532	9.12546e-06	7.59615e-05	Up	Conserved hypothetical protein.
Os06g0134000	175.35	394.947	1.17142	9.24988e-06	7.6897e-05	Up	Similar to 40S ribosomal protein S20.
Os08g0127800	1.59667	5.60667	1.81208	9.29146e-06	7.71824e-05	Up	Conserved hypothetical protein.
Os03g0689300	2.84	6.07	1.09581	9.48836e-06	7.86136e-05	Up	Plasma membrane H+ ATPase (EC 3.6.3.6) (H-ATPase).
Os12g0112000	12.0733	31.9	1.40173	9.51449e-06	7.88097e-05	Up	Similar to Peroxidase precursor (EC 1.11.1.7) (Fragment).
Os03g0658800	0.31	4.1	3.72528	9.55603e-06	7.90718e-05	Up	Cytochrome P450 family protein.
MSTRG.31723	1.10667	4.57667	2.04808	9.63851e-06	7.97336e-05	Up	--
Os05g0476700	10.87	25.1467	1.21002	9.71229e-06	8.02401e-05	Up	U-box E3ubiquitin ligase Positive regulation of cold stress response
Os02g0777800	18.3733	36.8	1.00209	9.75332e-06	8.05165e-05	Up	Protein kinase catalytic domain domain containing protein.
Os01g0228500	1.03333	3.17333	1.61869	9.83009e-06	8.10054e-05	Up	Harpin-induced 1 domain containing protein.
Os05g0135400	68.9933	149.267	1.11336	1.01487e-05	8.33495e-05	Up	Plant peroxidase domain containing protein.
Os09g0425500	2.95	8.92667	1.59741	1.04949e-05	8.6038e-05	Up	Hypothetical gene.
Os01g0160800	2.54667	6.51333	1.35479	1.05931e-05	8.67286e-05	Up	Similar to Protein synthesis inhibitor II (EC 3.2.2.22) (Ribosome-inactivating protein II) (rRNA N-glycosidase).
Os05g0552100	0.933333	2.72333	1.54491	1.05972e-05	8.67286e-05	Up	Conserved hypothetical protein.
Os03g0172100	37.3	91.8867	1.30068	1.06682e-05	8.71904e-05	Up	Similar to Leucine zipper protein.
Os10g0396100	2.53333	6.04667	1.2551	1.06846e-05	8.73021e-05	Up	Cyclin-like F-box domain containing protein.
Os01g0127000	0.62	2.54	2.03449	1.0702e-05	8.74218e-05	Up	Multicopper oxidase Maintenance of Pi homeostasis
Os08g0269800	3.16667	6.59667	1.05877	1.07066e-05	8.74373e-05	Up	Similar to Ubiquitin-protein ligase.
Os06g0701700	20.56	50.26	1.28957	1.10271e-05	8.97789e-05	Up	Ion transporter Na+/K+ symport
MSTRG.13274	2.32333	7.27333	1.64642	1.10353e-05	8.98232e-05	Up	--
Os04g0105200	25.77	68.6633	1.41385	1.10426e-05	8.9837e-05	Up	Similar to B0616E02-H0507E05.1 protein.
MSTRG.12716	1.47333	3.38333	1.19936	1.10721e-05	8.99848e-05	Up	--
Os12g0138166	1.52333	3.62333	1.25009	1.11903e-05	9.08074e-05	Up	Similar to GRAS family transcription factor containing protein.
Os04g0405700	0.736667	2.23333	1.60011	1.13111e-05	9.17176e-05	Up	Similar to H0502B11.13 protein.
MSTRG.27982	0.001	0.733333	9.51833	1.13781e-05	9.22372e-05	Up	far-red impaired response-like protein [Oryza sativa Japonica Group]
Os04g0640300	4.44	9.04	1.02576	1.14887e-05	9.31101e-05	Up	Similar to OSIGBa0138H21-OSIGBa0138E01.10 protein.
Os08g0154225	0.0966667	0.623333	2.68891	1.15039e-05	9.32096e-05	Up	DEAD-box ATP-dependent RNA helicase 42.
Os05g0177500	0.06	0.57	3.24793	1.15135e-05	9.32638e-05	Up	UDP-glucuronosyl/UDP-glucosyltransferase family protein.
MSTRG.17810	2.66	5.40333	1.02242	1.15574e-05	9.35723e-05	Up	--
Os04g0504700	1.08333	2.98667	1.46306	1.1565e-05	9.361e-05	Up	Conserved hypothetical protein.
Os04g0614300	0.71	3.84	2.43522	1.17986e-05	9.51942e-05	Up	Hypothetical conserved gene.
Os01g0227100	11.59	34.7667	1.58482	1.1831e-05	9.54242e-05	Up	Chlorophyll b reductase Leaf senescence
Os10g0465800	291.893	584.753	1.00239	1.18675e-05	9.56707e-05	Up	Similar to 60S ribosomal protein L21.
Os01g0786800	0.8	2.72333	1.7673	1.19025e-05	9.59286e-05	Up	Protein of unknown function DUF81 domain containing protein.
Os02g0572300	1.48667	4.14667	1.47987	1.198e-05	9.65291e-05	Up	Similar to RING-H2 finger protein ATL3B.
Os05g0153400	0.99	2.37667	1.26344	1.21945e-05	9.81366e-05	Up	Pentatricopeptide repeat domain containing protein.
Os10g0487500	4.55	9.19667	1.01524	1.22065e-05	9.81803e-05	Up	Conserved hypothetical protein.
MSTRG.20062	0.02	1.20667	5.91488	1.22977e-05	9.8765e-05	Up	--
Os04g0669600	2.67333	6.15333	1.20273	1.23527e-05	9.91818e-05	Up	Phospholipase/carboxylesterase domain containing protein.
MSTRG.20770	0.0233333	0.506667	4.44057	1.23738e-05	9.93146e-05	Up	--
Os06g0219500	5.28333	12.6333	1.25772	1.2641e-05	0.000101268	Up	Similar to 26.2 kDa heat shock protein mitochondrial.
Os11g0656100	1.18	3.24333	1.45869	1.2725e-05	0.000101889	Up	Hypothetical gene.
Os02g0719800	30.2	62.7167	1.0543	1.27293e-05	0.000101898	Up	Similar to AML1.
Os01g0960500	18.08	37.0667	1.03573	1.28607e-05	0.000102847	Up	Zinc finger RING/FYVE/PHD-type domain containing protein.
Os02g0687600	0.36	0.926667	1.36405	1.3e-05	0.000103779	Up	Hypothetical protein.
Os01g0740651	0.366667	1.24667	1.76553	1.34743e-05	0.000107297	Up	Hypothetical protein.
Os04g0476650	0.103333	0.81	2.97062	1.37236e-05	0.000108983	Up	Hypothetical gene.
Os04g0543000	0.623333	2.27667	1.86885	1.40917e-05	0.000111746	Up	Similar to Protein kinase.
Os10g0126500	2.47667	5.39667	1.12367	1.41352e-05	0.00011203	Up	Cyclin-like F-box domain containing protein.
Os10g0568100	0.693333	2.39667	1.78941	1.44045e-05	0.000113916	Up	Domain of unknown function DUF828 domain containing protein.
Os07g0667300	0.66	1.94667	1.56047	1.45551e-05	0.000114958	Up	CONSTANS-like transcriptional activator Negative regulation of flowering
MSTRG.17465	5.36667	11.6233	1.11493	1.46235e-05	0.00011547	Up	--
Os08g0197300	0.343333	1.14333	1.73556	1.46329e-05	0.000115498	Up	F-box domain cyclin-like domain containing protein.
MSTRG.24984	0.8	2.38	1.57289	1.49885e-05	0.000118031	Up	--
MSTRG.9898	0.0266667	1.23	5.52748	1.50013e-05	0.000118103	Up	--
MSTRG.20771	0.116667	1.48667	3.67162	1.53986e-05	0.000120903	Up	PREDICTED: probable glycosyltransferase 5 [Oryza sativa Japonica Group]
Os10g0503800	13.5767	28.4933	1.0695	1.54702e-05	0.000121435	Up	Similar to Remorin.
Os02g0773400	2.21333	4.95	1.16121	1.5577e-05	0.000122094	Up	Cyclic nucleotide-binding domain containing protein.
Os09g0542900	4.47333	9.97	1.15624	1.58393e-05	0.000123907	Up	Conserved hypothetical protein.
MSTRG.4974	0.0133333	0.41	4.94251	1.58951e-05	0.000124313	Up	--
MSTRG.8612	0.903333	2.22	1.29723	1.59887e-05	0.000124861	Up	--
Os02g0227100	13.8633	38.5133	1.47408	1.65529e-05	0.000128826	Up	Conserved hypothetical protein.
MSTRG.18751	21.3067	53.67	1.33281	1.70063e-05	0.000132065	Up	F-box domain containing protein, expressed [Oryza sativa Japonica Group]
MSTRG.6932	0.623333	1.61	1.36898	1.70415e-05	0.000132307	Up	--
Os01g0851100	12.6633	27.3167	1.10912	1.71494e-05	0.000132983	Up	GDP-fucose protein O-fucosyltransferase domain containing protein.
Os12g0171900	3.95333	8.55	1.11285	1.72753e-05	0.000133862	Up	Hypothetical gene.
Os10g0535800	16.76	48.21	1.52431	1.73914e-05	0.000134663	Up	Protein of unknown function Cys-rich domain containing protein.
Os07g0579100	0.613333	2.77333	2.17688	1.77606e-05	0.000137356	Up	Conserved hypothetical protein.
Os06g0656300	0.856667	2.66667	1.63823	1.78642e-05	0.000138056	Up	Uncharacterised protein family UPF0497 trans-membrane plant subgroup domain containing protein.
Os07g0157700	1.27333	3.23333	1.34441	1.81013e-05	0.000139787	Up	Conserved hypothetical protein.
Os09g0287000	1.8	4.76333	1.40397	1.81454e-05	0.00014006	Up	Similar to Ethylene-responsive transcription factor 5 (Ethylene-responsive element binding factor 5) (EREBP-5) (AtERF5).
MSTRG.9118	0.106667	0.616667	2.53138	1.82004e-05	0.000140349	Up	PREDICTED: probable WRKY transcription factor 69 isoform X1 [Oryza sativa Japonica Group]
Os08g0340900	1.03667	2.1	1.01844	1.85891e-05	0.000143001	Up	Pentatricopeptide repeat domain containing protein.
Os01g0557400	1.91	4.24	1.15049	1.90113e-05	0.000145933	Up	Cyclin-like F-box domain containing protein.
Os09g0532400	10.4733	21.18	1.01598	1.90789e-05	0.000146311	Up	Circadian-associated rice pseudo response regulator Control of flowering time
MSTRG.22742	0.7	2.61333	1.90046	1.92676e-05	0.000147581	Up	--
MSTRG.4893	0.001	0.39	8.60733	1.92899e-05	0.000147709	Up	--
Os02g0455400	9.25	20.24	1.12968	1.93971e-05	0.000148395	Up	Hypothetical conserved gene.
Os04g0558200	0.09	0.983333	3.44968	2.01198e-05	0.000153446	Up	Cactin domain domain containing protein.
Os03g0397600	0.276667	1.44	2.37985	2.07775e-05	0.000158124	Up	Glycoside hydrolase family 17 protein.
Os12g0443000	0.956667	2.85333	1.57656	2.09765e-05	0.000159485	Up	Similar to Cytochrome P450 family protein expressed.
Os08g0114300	88.5267	205.12	1.21228	2.09933e-05	0.000159556	Up	D-arabinono-1 4-lactone oxidase domain containing protein.
Os11g0137500	0.386667	1.13	1.54716	2.09958e-05	0.000159556	Up	Transcription factor TFE/TFIIEalpha HTH domain domain containing protein.
Os01g0585200	1.63333	5.46667	1.74284	2.11974e-05	0.000160935	Up	Similar to cDNA clone:J023088C01 full insert sequence.
MSTRG.5876	0.0333333	0.753333	4.49825	2.12086e-05	0.000160982	Up	--
Os09g0572700	43.8367	88.4033	1.01196	2.15807e-05	0.000163496	Up	Similar to Blue copper-binding protein.
Os03g0610800	3.52667	9.12333	1.37126	2.20878e-05	0.000166981	Up	Similar to Protein zx.
Os02g0251700	3.75333	8.65667	1.20564	2.22114e-05	0.000167756	Up	Conserved hypothetical protein.
Os10g0127000	3.25333	6.90333	1.08537	2.24748e-05	0.000169545	Up	Similar to F-box domain containing protein expressed.
Os07g0616750	2.3	6.42333	1.48169	2.27259e-05	0.000171157	Up	Hypothetical gene.
Os02g0570700	10.2333	31.17	1.60688	2.27687e-05	0.000171439	Up	Cytochrome P450 family protein.
Os02g0318100	1.29333	5.32667	2.04214	2.32435e-05	0.000174808	Up	Similar to Alternative oxidase.
Os12g0518200	5.12667	11.79	1.20147	2.37782e-05	0.000178326	Up	Similar to Integral membrane protein DUF6 containing protein.
Os01g0946500	9.31	23.8633	1.35794	2.38926e-05	0.000179099	Up	Similar to Glucan endo-1 3-beta-glucosidase GV (EC 3.2.1.39) ((1->3)-beta-glucan endohydrolase GV) ((1->3)-beta-glucanase isoenzyme GV) (Beta-1 3- endoglucanase GV).
Os01g0823400	1.99333	4.81	1.27085	2.39337e-05	0.000179366	Up	Hypothetical conserved gene.
Os05g0467600	0.52	1.36	1.38702	2.41012e-05	0.000180367	Up	Conserved hypothetical protein.
Os01g0360100	0.74	2.11333	1.51392	2.41199e-05	0.000180464	Up	Similar to Powdery mildew resistance protein pm3f (Fragment).
MSTRG.12165	0.01	0.603333	5.91488	2.45137e-05	0.000183281	Up	--
Os04g0569000	9.76	20.0667	1.03985	2.4627e-05	0.000183949	Up	Similar to Replication factor C 40kDa subunit.
Os08g0136800	0.07	1.49667	4.41825	2.47454e-05	0.000184534	Up	Protein of unknown function DUF26 domain containing protein.
Os06g0685300	1.10667	2.75667	1.3167	2.50758e-05	0.000186829	Up	Similar to predicted protein.
Os01g0221400	5.8	15.01	1.3718	2.53685e-05	0.000188745	Up	Conserved hypothetical protein.
Os02g0702100	2.02	5.74667	1.50837	2.55664e-05	0.000190129	Up	Similar to transcription factor GT-3b.
Os04g0419800	3.27333	7.89667	1.27048	2.58514e-05	0.000192025	Up	Hypothetical protein.
Os01g0124550	0.403333	3.06667	2.92663	2.63034e-05	0.00019502	Up	Hypothetical protein.
Os02g0744100	3.32	7.38333	1.15309	2.63504e-05	0.000195278	Up	Methyltransferase type 11 domain containing protein.
Os04g0309600	0.556667	1.49	1.42043	2.64032e-05	0.000195533	Up	Similar to Sucrose synthase.
Os03g0648600	1.46667	4.92	1.74612	2.66246e-05	0.000196899	Up	Similar to Zinc finger C3HC4 type family protein expressed.
Os08g0439900	3.20333	7.61	1.24832	2.69696e-05	0.000199265	Up	Mitochondrial glycoprotein family protein.
Os01g0623550	2.97	6.67333	1.16794	2.71322e-05	0.000200282	Up	Hypothetical protein.
Os02g0565600	16.71	36.5433	1.1289	2.71795e-05	0.000200538	Up	Similar to Homeodomain leucine zipper protein (Fragment).
Os11g0147800	149.743	304.787	1.02531	2.88469e-05	0.000211959	Up	Similar to Wali7 protein (Fragment).
Os02g0282500	0.216667	1.14	2.39548	2.94605e-05	0.000216219	Up	Disease resistance protein domain containing protein.
Os01g0224300	5.41667	12.43	1.19835	2.94883e-05	0.000216374	Up	CHCH domain containing protein.
MSTRG.20881	0.146667	28.04	7.5788	2.96074e-05	0.000217148	Up	--
Os11g0112050	3.63667	8.02	1.14099	2.99582e-05	0.000219519	Up	Conserved hypothetical protein.
Os04g0509400	14.1967	35.8533	1.33656	3.05385e-05	0.000223157	Up	RmlC-like jelly roll fold domain containing protein.
Os06g0589750	0.0433333	1.06	4.61244	3.06122e-05	0.000223593	Up	Hypothetical protein.
Os04g0649000	0.21	1.13333	2.43211	3.10204e-05	0.000226265	Up	Conserved hypothetical protein.
Os01g0701900	1.98333	4.02667	1.02166	3.1571e-05	0.000229756	Up	Similar to Phosphatidylinositol transfer-like protein III.
Os01g0918200	59.0467	125.72	1.09029	3.16048e-05	0.00022995	Up	Similar to Ubiquitin-like protein SMT3.
Os01g0571100	36.7	82.7267	1.17257	3.19067e-05	0.000231849	Up	Similar to gibberellin responsive1.
Os04g0194000	1.91667	5.35333	1.48184	3.19576e-05	0.000232147	Up	Cyclin-like F-box domain containing protein.
Os01g0727600	2.21667	5.34	1.26845	3.20495e-05	0.000232708	Up	Conserved hypothetical protein.
Os02g0511400	2.53333	12.2967	2.27916	3.20746e-05	0.000232785	Up	Glucose/ribitol dehydrogenase family protein.
MSTRG.14630	0.236667	1.37	2.53325	3.22571e-05	0.00023395	Up	--
Os04g0674000	50.9067	114.453	1.16883	3.23128e-05	0.000234301	Up	Similar to H0403D02.10 protein.
Os02g0582600	5.58	81.48	3.86811	3.33329e-05	0.000240714	Up	Heavy metal transport/detoxification protein domain containing protein.
Os07g0546750	1.23667	2.76	1.15821	3.38587e-05	0.000244125	Up	Hypothetical conserved gene.
Os11g0480000	1.29667	2.67333	1.04383	3.38947e-05	0.000244274	Up	NB-ARC domain containing protein.
Os02g0796000	0.001	0.326667	8.35168	3.41806e-05	0.000246064	Up	Similar to CPL3.
Os03g0793900	11.3367	24.0067	1.08244	3.4271e-05	0.000246597	Up	Conserved hypothetical protein.
Os03g0183600	2.28333	5.72667	1.32655	3.56381e-05	0.000255169	Up	Similar to Alanine aminotransferase.
Os02g0561000	0.1	0.7	2.80735	3.60171e-05	0.000257537	Up	RING-H2 type E3 ubiquitin ligase Root development Maintenance of cell viability after the initiation of root primordial formation Defense response
Os03g0588100	0.136667	0.78	2.51281	3.64598e-05	0.000260411	Up	Hypothetical conserved gene.
MSTRG.6570	0.001	0.603333	9.23681	3.68841e-05	0.000263147	Up	--
MSTRG.8373	0.0433333	1.12	4.69188	3.73242e-05	0.00026599	Up	BKRF1 encodes EBNA-1 protein-like [Oryza sativa Japonica Group]
Os08g0167400	0.173333	1.04333	2.58958	3.75453e-05	0.000267198	Up	Hypothetical conserved gene.
Os05g0470650	4.84333	10.2067	1.07544	3.75522e-05	0.000267198	Up	Hypothetical conserved gene.
Os01g0719400	0.403333	1.07667	1.41653	3.8282e-05	0.000271725	Up	CASC3/Barentsz eIF4AIII binding domain containing protein.
Os06g0530700	1.64667	4.27667	1.37694	3.87164e-05	0.000274625	Up	tRNA intron endonuclease catalytic domain-like domain containing protein.
Os11g0701400	0.833333	5.31667	2.67356	3.9066e-05	0.000276675	Up	Chitinase (EC 3.2.1.14) III C10150-rice (EC 3.2.1.14).
Os08g0444440	1.13333	4.87	2.10335	3.90889e-05	0.000276776	Up	Hypothetical conserved gene.
Os06g0158100	1.34333	3.27333	1.28494	4.0066e-05	0.000283004	Up	Similar to WRKY transcription factor 63.
Os11g0608300	0.463333	2.52333	2.44521	4.0211e-05	0.000283777	Up	Barley stem rust resistance protein.
Os03g0327800	15.6267	41.98	1.42569	4.03061e-05	0.000284323	Up	NAC Family transcriptional activator Abiotic stress response Positive regulator of leaf senescence
MSTRG.9990	2.92	5.87333	1.00821	4.05127e-05	0.000285528	Up	--
Os07g0141700	0.46	1.58667	1.78629	4.08648e-05	0.000287675	Up	NB-ARC domain containing protein.
Os04g0454900	0.33	1.30333	1.98167	4.0932e-05	0.000288039	Up	Similar to Mitotic spindle checkpoint component mad3.
Os05g0486700	154.24	331.163	1.10237	4.09423e-05	0.000288048	Up	Ribosomal protein L24e domain containing protein.
Os03g0410100	1.32	3.06333	1.21456	4.14425e-05	0.000291182	Up	Similar to cDNA clone:J033024M21 full insert sequence.
Os03g0792800	10.9167	22.7	1.05616	4.19234e-05	0.000294044	Up	Beta-1 3-glucanase-like protein.
Os01g0723100	4.15667	12.22	1.55575	4.2247e-05	0.000295729	Up	Senescence-associated family protein.
MSTRG.27177	0.226667	1.13667	2.32617	4.23862e-05	0.000296573	Up	--	BKRF1 encodes EBNA-1 protein-like [Oryza sativa Japonica Group]
MSTRG.6437	0.6	2.76667	2.20511	4.30157e-05	0.000300649	Up	--
Os01g0696500	5.97333	13.17	1.14065	4.37891e-05	0.000305439	Up	Conserved hypothetical protein.
Os04g0535600	69.94	181.983	1.37962	4.38054e-05	0.000305439	Up	Similar to Beta-fructofuranosidase 1 precursor (EC 3.2.1.26) (Sucrose 1) (Invertase 1).
Os09g0385700	2.26333	6.38	1.49511	4.38515e-05	0.000305688	Up	Zinc finger AN1-type domain containing protein.
Os09g0472200	4.02333	11.51	1.51642	4.43459e-05	0.00030873	Up	Similar to white-brown-complex ABC transporter family.
Os12g0109600	1.7	3.51	1.04594	4.47981e-05	0.000311539	Up	Protein of unknown function DUF1677 Oryza sativa family protein.
Os12g0258700	78.5467	279.95	1.83355	4.49247e-05	0.000312215	Up	Cupredoxin domain containing protein.
Os04g0654500	5.65	14.3833	1.34808	4.57933e-05	0.00031763	Up	Conserved hypothetical protein.
Os05g0142500	3.95667	15.61	1.98011	4.62249e-05	0.000320345	Up	Hypothetical conserved gene.
Os08g0467500	1.83333	4.95	1.43296	4.69831e-05	0.000324895	Up	TB2/DP1 and HVA22 related protein family protein.
MSTRG.22172	0.24	1.27333	2.4075	4.719e-05	0.000326255	Up	--
Os04g0415800	9.02667	33.05	1.87239	4.73341e-05	0.000327069	Up	Similar to OSIGBa0092M08.2 protein.
MSTRG.9690	2.34333	5.84667	1.31905	4.74798e-05	0.000327904	Up	--
Os01g0288800	0.001	0.496667	8.95613	4.77439e-05	0.000329462	Up	Conserved hypothetical protein.
Os07g0597200	14.7333	34.0167	1.20716	4.80337e-05	0.000331085	Up	Protein kinase core domain containing protein.
Os03g0136500	16.9267	34.6233	1.03245	4.87064e-05	0.000335237	Up	Similar to protein-methionine-s-oxide reductase.
Os01g0126100	2.40333	5.54333	1.20572	4.88986e-05	0.000336249	Up	Multicopper oxidase
Os07g0515700	1.66	3.36	1.01728	4.92011e-05	0.000338111	Up	Similar to cDNA clone: J100054L12 full insert sequence.
Os08g0197800	0.506667	1.47667	1.54324	4.96222e-05	0.000340565	Up	Conserved hypothetical protein.
Os07g0664900	0.643333	1.99667	1.63396	5.10623e-05	0.000349548	Up	Similar to Short-chain dehydrogenase/reductase (Fragment).
Os01g0788400	9.63667	25.9967	1.43172	5.11155e-05	0.000349762	Up	Similar to Pectinesterase (EC 3.1.1.11) (Fragment).
Os11g0528400	0.46	1.62333	1.81925	5.14966e-05	0.000352068	Up	Similar to aminopeptidase.
Os01g0730200	2.65333	6.16333	1.2159	5.20344e-05	0.000355137	Up	F-box domain cyclin-like domain containing protein.
Os01g0838300	3.43	11.9233	1.79751	5.20686e-05	0.000355294	Up	Hypothetical protein.
Os04g0224200	3.22667	7.41333	1.20008	5.27974e-05	0.000359636	Up	Hypothetical protein.
MSTRG.14125	30.44	75.6367	1.31312	5.31645e-05	0.000361691	Up	--
Os01g0226400	0.643333	1.84333	1.51868	5.38484e-05	0.000365954	Up	ATPase AAA-type core domain containing protein.
Os01g0105800	2.65333	6.34333	1.25744	5.62247e-05	0.000379935	Up	Similar to Iron sulfur assembly protein 1.
Os06g0594300	0.793333	2.80667	1.82286	5.62387e-05	0.000379935	Up	Hypothetical protein.
Os05g0434800	3.14	9.48	1.59412	5.63052e-05	0.000380304	Up	Protein of unknown function DUF1218 domain containing protein.
MSTRG.5656	1.03667	2.38667	1.20305	5.73807e-05	0.000387077	Up	--
Os05g0498300	1.61	4.17333	1.37414	5.75631e-05	0.000388226	Up	DNA mismatch repair protein MutS core domain containing protein.
Os03g0386800	0.61	1.79667	1.55844	5.77162e-05	0.000389094	Up	Peptidase S10 serine carboxypeptidase family protein.
Os01g0571133	2.29	6.49333	1.50361	5.77567e-05	0.000389248	Up	Hypothetical gene.
Os01g0166400	1.1	2.35	1.09516	5.77633e-05	0.000389248	Up	Similar to phosphatidylinositolglycan-related.
Os08g0169100	0.483333	1.44333	1.57831	5.79062e-05	0.0003898	Up	Hypothetical gene.
MSTRG.1357	0.06	0.933333	3.95936	5.80114e-05	0.000390425	Up	PREDICTED: hydrophobic protein RCI2B isoform X2 [Beta vulgaris subsp. vulgaris] [Beta vulgaris]
Os05g0456000	6.97333	14.4967	1.0558	5.91105e-05	0.000397069	Up	Mitochondrial glycoprotein family protein.
Os06g0594400	0.896667	3.17667	1.82487	5.9607e-05	0.000400152	Up	Kelch-type beta propeller domain containing protein.
Os03g0603500	5.48	12.9967	1.24589	5.99148e-05	0.000402134	Up	Conserved hypothetical protein.
Os03g0762200	28.5567	61.6267	1.10973	6.02576e-05	0.000404095	Up	Hypothetical protein.
Os04g0581700	1.89	6.39667	1.75893	6.17285e-05	0.000412833	Up	Similar to predicted protein.
Os03g0570100	1.02667	3.23333	1.65505	6.25557e-05	0.000417578	Up	Similar to Cytochrome P450 79A1 (EC 1.14.13.41) (Tyrosine N-monooxygenase) (Cytochrome P450Tyr).
MSTRG.31508	0.08	0.753333	3.23522	6.26399e-05	0.000417966	Up	cell wall protein-like [Oryza sativa Japonica Group]
Os01g0101850	0.001	0.283333	8.14636	6.35108e-05	0.000422982	Up	Hypothetical protein.
Os08g0499300	0.863333	3.18667	1.88406	6.38713e-05	0.000425294	Up	WRKY transcription factor 30.
Os06g0601600	0.353333	1.21	1.77591	6.44016e-05	0.000428379	Up	Cellulose synthase domain containing protein.
Os05g0340000	1.18	2.60667	1.14342	6.45436e-05	0.000429145	Up	Conserved hypothetical protein.
Os11g0167300	1.87667	3.75667	1.00128	6.46696e-05	0.000429706	Up	Protein of unknown function DUF537 family protein.
Os11g0672200	1.67	7.72	2.20875	6.46818e-05	0.000429706	Up	Similar to Protein kinase domain containing protein expressed.
Os01g0267800	1.02667	2.62333	1.35343	6.47859e-05	0.000430308	Up	Serine/threonine protein kinase domain containing protein.
Os06g0697600	34.5167	83.9967	1.28304	6.51478e-05	0.000432442	Up	ATPase AAA-type core domain containing protein.
Os09g0564600	0.263333	3.17333	3.59104	6.55193e-05	0.000434477	Up	Peptidase C1A papain family protein.
Os08g0138100	3.13333	8.55667	1.44935	6.62215e-05	0.000438839	Up	Similar to blue copper protein.
Os01g0719150	1.13667	3.63333	1.67648	6.65268e-05	0.00044068	Up	Conserved hypothetical protein.
Os12g0231100	2.13333	5.52333	1.37243	6.70488e-05	0.000443678	Up	Conserved hypothetical protein.
Os05g0513900	17.3533	38.13	1.13571	6.78321e-05	0.000448211	Up	Similar to Proline iminopeptidase (EC 3.4.11.5) (PIP) (Prolyl aminopeptidase) (PAP).
Os04g0617500	0.116667	1.4	3.58496	6.79837e-05	0.000449027	Up	Similar to H0313F03.4 protein.
Os07g0241800	4.12667	9.37667	1.1841	6.85056e-05	0.0004521	Up	UDP-glucuronosyl/UDP-glucosyltransferase family protein.
Os02g0149500	0.523333	1.45	1.47025	6.89042e-05	0.000454449	Up	Conserved hypothetical protein.
Os02g0745200	1.77	4.02667	1.18584	6.90853e-05	0.000455435	Up	Hypothetical gene.
Os05g0355400	2.97333	6.76	1.18494	6.90965e-05	0.000455435	Up	UspA domain containing protein.
Os07g0296000	4.43	11.2267	1.34155	6.93011e-05	0.00045669	Up	Conserved hypothetical protein.
Os01g0819800	0.883333	1.94	1.13503	6.96481e-05	0.000458598	Up	Pentatricopeptide repeat domain containing protein.
Os01g0128200	2.63333	6.61333	1.32849	7.14272e-05	0.000469248	Up	Similar to Nuclease I.
Os03g0356470	0.001	0.376667	8.55714	7.35505e-05	0.000482305	Up	Hypothetical conserved gene.
MSTRG.5263	0.17	0.993333	2.54674	7.51062e-05	0.000491753	Up	--
Os02g0771400	13.39	30.8567	1.20443	7.53477e-05	0.000492977	Up	Protein-tyrosine phosphatase SIW14-like domain containing protein.
Os03g0269300	0.0133333	0.3	4.49185	7.61844e-05	0.000498145	Up	Protein kinase-like domain containing protein.
Os03g0165266	0.213333	0.75	1.81378	7.65303e-05	0.000500305	Up	Hypothetical conserved gene.
Os04g0606200	7.05333	19.0833	1.43594	7.67698e-05	0.000501665	Up	Similar to OSIGBa0113I13.1 protein.
Os03g0255100	19.3267	55.0667	1.51059	7.70892e-05	0.000503238	Up	Similar to Relative to SR12 protein (Fragment).
MSTRG.29112	0.276667	2.41333	3.12481	7.75668e-05	0.000505942	Up	--
Os05g0414400	0.02	0.256667	3.68182	7.90241e-05	0.0005147	Up	Domain of unknown function DUF659 domain containing protein.
Os02g0555200	0.196667	0.743333	1.91826	7.90275e-05	0.0005147	Up	Conserved hypothetical protein.
Os01g0660900	0.333333	1.76	2.40054	7.93747e-05	0.00051663	Up	Similar to phosphoglycerate mutase family protein.
Os03g0826900	0.496667	1.79667	1.85497	8.12564e-05	0.000527531	Up	Conserved hypothetical protein.
Os03g0207800	0.773333	2.07667	1.42511	8.14571e-05	0.000528512	Up	Armadillo-like helical domain containing protein.
MSTRG.16468	1.05333	2.69667	1.35622	8.3673e-05	0.000541789	Up	--
Os04g0640200	0.136667	0.52	1.92785	8.51054e-05	0.000550172	Up	Conserved hypothetical protein.
MSTRG.25131	1.67333	3.55667	1.0878	8.54125e-05	0.000551822	Up	--
Os02g0744501	0.001	1.34	10.388	8.57916e-05	0.000553935	Up	Conserved hypothetical protein.
Os05g0176400	0.62	1.63333	1.39748	9.00003e-05	0.000578653	Up	Zinc finger CCCH-type domain containing protein.
Os07g0587300	2.20333	5.87667	1.41531	9.02529e-05	0.000580161	Up	Hypothetical conserved gene.
MSTRG.31040	2.56333	6.78	1.40326	9.14582e-05	0.000587067	Up	PREDICTED: translation initiation factor IF-2-like [Oryza sativa Japonica Group]
Os07g0151300	1.52667	3.52333	1.20656	9.22062e-05	0.000591052	Up	MAGE protein family protein.
Os01g0795200	1.22333	3.56667	1.54376	9.29115e-05	0.000594674	Up	Similar to Subtilase.
Os05g0171900	43.11	93.8467	1.12228	9.31022e-05	0.000595614	Up	Glyoxalase/bleomycin resistance protein/dioxygenase domain containing protein.
Os09g0491852	1.16667	3.87667	1.73242	9.32388e-05	0.000596355	Up	NAD(P)-binding domain containing protein.
Os07g0686825	6.97333	17.28	1.30918	9.34646e-05	0.00059756	Up	Hypothetical protein.
Os04g0367201	0.596667	1.75	1.55236	9.41497e-05	0.000601218	Up	Conserved hypothetical protein.
Os02g0217250	0.703333	2.03	1.5292	9.44452e-05	0.000602985	Up	Hypothetical protein.
Os03g0388800	0.176667	1.40333	2.98976	9.50875e-05	0.000606601	Up	Similar to Hydrolase.
Os02g0216000	0.0233333	0.24	3.36257	9.52242e-05	0.000607351	Up	Hypothetical conserved gene.
Os10g0568000	2.53333	6.31333	1.31737	9.57434e-05	0.000610054	Up	Conserved hypothetical protein.
Os08g0298700	4.18333	10.5233	1.33087	9.69023e-05	0.000616209	Up	Similar to male sterility protein 2.
Os01g0868000	1.32	3.33333	1.33643	9.86578e-05	0.000625449	Up	AP2/ERF transcription factor Abiotic stress response Salt stress response
Os01g0302500	9.79333	19.7833	1.01441	9.87209e-05	0.000625657	Up	Knotted1-type homeobox protein OSH6.
Os11g0198250	9.15333	23.3833	1.35311	9.87438e-05	0.000625678	Up	Hypothetical gene.
Os08g0324300	0.476667	1.22667	1.36369	9.89008e-05	0.000626424	Up	Transcriptional factor B3 family protein.
Os05g0120200	11.6033	25.89	1.15786	0.000101289	0.000639395	Up	Similar to ATPase coupled to transmembrane movement of substances.
Os04g0249600	1.29	3.46333	1.42479	0.000102309	0.000644817	Up	Similar to senescence-associated protein DIN1.
MSTRG.13215	5.68	19.0467	1.74558	0.000103754	0.000652505	Up	heavy metal-associated isoprenylated plant protein 47-like [Aegilops tauschii subsp. tauschii] [Aegilops tauschii]
Os01g0137400	0.0533333	0.446667	3.06609	0.00010405	0.000654111	Up	Protein kinase catalytic domain domain containing protein.
Os01g0627550	0.3	1.00667	1.74655	0.000104643	0.000657578	Up	Hypothetical protein.
MSTRG.17365	0.296667	0.943333	1.66892	0.000106223	0.000666327	Up	--
Os06g0255400	10.84	24.47	1.17465	0.000106472	0.000667761	Up	Similar to Nudix hydrolase 18 mitochondrial precursor (EC 3.6.1.-) (AtNUDT18).
MSTRG.33156	0.11	0.616667	2.48699	0.000107353	0.000672493	Up	cell wall protein-like [Oryza sativa Japonica Group]
Os07g0516300	75.49	162.123	1.10273	0.000108178	0.000677	Up	Protein of unknown function DUF584 family protein.
MSTRG.5037	0.223333	1.46333	2.71199	0.000108465	0.000678261	Up	--
Os01g0187600	2.17	5.77	1.41088	0.000108662	0.00067936	Up	Similar to Cytokinin dehydrogenase 1.
Os03g0719900	25.0333	54.0833	1.11133	0.000108826	0.000680253	Up	Similar to Peptide transporter 1.
Os01g0128000	3.96667	10.2633	1.3715	0.000109812	0.000685479	Up	Myb transcription factor domain containing protein.
Os06g0225100	1.14333	2.43	1.08771	0.000109865	0.000685672	Up	Mitochodrial transcription termination factor-related family protein.
Os01g0103000	7.83667	16.6167	1.08432	0.000110739	0.00069032	Up	Snf7 family protein.
MSTRG.4223	0.001	0.676667	9.4023	0.000112143	0.000698118	Up	--
Os03g0374600	5.96667	16.3167	1.45135	0.000113878	0.000707544	Up	Glycoside hydrolase family 17 protein.
Os10g0504900	0.001	0.766667	9.58246	0.000113913	0.00070762	Up	Similar to Lipid transfer protein.
Os03g0741100	9.12667	22.5733	1.30646	0.00011406	0.000708398	Up	Basic helix-loop-helix transcription factor Drought tolerance
Os01g0956075	5.59	12.3267	1.14086	0.000114625	0.000711491	Up	Armadillo-like helical domain containing protein.
MSTRG.5648	0.0333333	0.583333	4.12928	0.000114736	0.00071204	Up	BKRF1 encodes EBNA-1 protein-like [Oryza sativa Japonica Group]
Os12g0509200	0.001	0.183333	7.51833	0.000114891	0.000712863	Up	Conserved hypothetical protein.
Os08g0145501	0.61	1.7	1.47865	0.000116297	0.00072103	Up	Conserved hypothetical protein.
Os03g0145775	0.0266667	1.16333	5.44708	0.000116964	0.000724883	Up	Conserved hypothetical protein.
Os04g0635400	4.09	16.1233	1.97898	0.00011749	0.000727579	Up	Conserved hypothetical protein.
Os05g0181200	0.183333	0.91	2.3114	0.000117568	0.000727919	Up	Similar to Phytochrome P450-like protein.
Os03g0565900	0.246667	0.89	1.85124	0.000120234	0.000742987	Up	Protein of unknown function DUF1723 domain containing protein.
Os03g0439000	4.06333	8.72333	1.10222	0.000121531	0.000749986	Up	Conserved hypothetical protein.
MSTRG.8721	1.73667	6.38333	1.87799	0.000122968	0.000757246	Up	--
MSTRG.5110	0.273333	1.01667	1.89511	0.000123001	0.000757303	Up	--
Os05g0404600	9.39333	19.2833	1.03765	0.000125414	0.000770081	Up	Methyl-CpG DNA binding domain containing protein.
Os05g0334750	1.44333	3.26333	1.17694	0.000127249	0.000779848	Up	Similar to CBL-interacting protein kinase 22.
Os04g0346100	96.1167	194.62	1.0178	0.000129306	0.000791848	Up	Ribosomal protein S27.
Os05g0540200	33.87	73.02	1.10828	0.000130719	0.000799276	Up	Similar to EMB2752.
MSTRG.23646	0.0633333	1.42	4.48678	0.000130963	0.000800611	Up	CYSTM domain-containing protein, partial [Cephalotus follicularis]
Os06g0184100	2.20667	5.82333	1.39998	0.000131688	0.000804433	Up	Conserved hypothetical protein.
MSTRG.17332	0.59	1.60333	1.44229	0.00013201	0.000806089	Up	--
Os06g0612300	0.001	0.213333	7.73697	0.0001322	0.000807093	Up	Similar to T6J4.5 protein (WIP6 protein).
Os03g0299800	5.56333	14.05	1.33655	0.000133648	0.000814688	Up	Protein of unknown function Cys-rich family protein.
Os08g0197200	0.106667	0.526667	2.30378	0.000134661	0.00082008	Up	Conserved hypothetical protein.
MSTRG.7914	3.14667	8.63667	1.45665	0.000137508	0.00083519	Up	Rtac1 [Oryza sativa Japonica Group]
Os01g0609300	32.4533	88.3233	1.44443	0.000138633	0.000840906	Up	Similar to Pleiotropic drug resistance protein 3.
Os05g0450300	0.0433333	0.893333	4.36565	0.000139432	0.000845369	Up	Conserved hypothetical protein.
Os04g0626300	0.23	0.826667	1.84567	0.00014004	0.000848794	Up	Hypothetical protein.
Os01g0768100	2.37	5.82333	1.29696	0.000140321	0.000850177	Up	Conserved hypothetical protein.
Os09g0561500	1.09667	5.00333	2.18976	0.000141279	0.000854798	Up	Wall-associated kinase Rice blast resistance
Os10g0514600	0.01	0.3	4.90689	0.000141644	0.000856403	Up	Similar to Clone ZZD584 mRNA sequence.
Os02g0299300	0.766667	2.15667	1.49213	0.000141893	0.000857588	Up	Similar to cDNA clone:J023112L03 full insert sequence.
MSTRG.28732	0.8	4.83333	2.59495	0.00014265	0.000861021	Up	RecName: Full=IAA-amino acid hydrolase ILR1-like 9; Flags: Precursor
MSTRG.32723	0.316667	3.93	3.63349	0.000144953	0.00087327	Up	PREDICTED: ABC transporter G family member 45 [Oryza sativa Japonica Group]
Os12g0578800	1.04333	2.28	1.12783	0.000144993	0.000873347	Up	Zinc finger C2H2 domain containing protein.
Os09g0323500	0.146667	1.47333	3.32847	0.00014545	0.000875603	Up	Protein of unknown function DUF833 family protein.
Os04g0127750	0.001	0.07	6.12928	0.000145859	0.000877903	Up	Similar to OSIGBa0097I11.2 protein.
Os02g0805500	1.39	2.95667	1.08889	0.000147413	0.000885919	Up	Similar to PAP-specific phosphatase HAL2-like (3'(2') 5'-bisphosphate nucleotidase) (EC 3.1.3.7) (3'(2') 5-bisphosphonucleoside 3'(2')- phosphohydrolase) (DPNPase) (Halotolerance protein).
MSTRG.6568	0.02	0.756667	5.24159	0.000147497	0.000886256	Up	--
Os01g0561600	2.17333	7	1.68745	0.000147639	0.000886543	Up	Cytochrome P450 family protein.
Os10g0205500	0.0233333	0.416667	4.15843	0.000149387	0.000895931	Up	Similar to PDR3 ABC transporter.
Os09g0463232	0.526667	1.45	1.46109	0.000150894	0.000904629	Up	Hypothetical gene.
Os04g0535501	9.75667	27.3367	1.48638	0.000154707	0.000925922	Up	Hypothetical gene.
Os07g0122350	3.39	9.65333	1.50974	0.000157371	0.000940813	Up	Hypothetical genes.
MSTRG.25124	1.64667	3.49	1.08368	0.000161658	0.000964812	Up	PREDICTED: formin-like protein 5 [Oryza sativa Japonica Group]
Os10g0433700	0.25	0.663333	1.40781	0.000162227	0.000967485	Up	Hypothetical protein.
Os03g0622500	21.93	54.6167	1.31644	0.000162659	0.00096916	Up	Conserved hypothetical protein.
Os06g0695700	5.00667	12.7933	1.35347	0.000162872	0.000970109	Up	Calmodulin-binding plant family protein.
Os01g0710300	1.71333	5.54333	1.69395	0.000164838	0.000981408	Up	Conserved hypothetical protein.
Os07g0111400	2.72	6.93667	1.35064	0.000165705	0.000986389	Up	WRKY transcription factor 29.
Os06g0702200	0.156667	0.693333	2.14585	0.000166135	0.000988396	Up	Conserved hypothetical protein.
Os04g0352066	2.26333	8.76333	1.95303	0.000168856	0.00100327	Up	Conserved hypothetical protein.
Os09g0266100	0.186667	0.586667	1.65208	0.000169852	0.00100878	Up	Conserved hypothetical protein.
Os04g0493400	0.313333	2.77333	3.14585	0.000175249	0.00103644	Up	Similar to Chitinase.
Os03g0441601	6.03667	12.2033	1.01545	0.000176463	0.00104323	Up	Hypothetical conserved gene.
Os01g0383900	1.50333	3.17	1.07632	0.000177608	0.00104942	Up	Peptidase S59 nucleoporin family protein.
Os02g0585200	5.60667	11.5733	1.04559	0.000177815	0.00104987	Up	Heavy metal transport/detoxification protein domain containing protein.
Os08g0413000	0.1	0.513333	2.3599	0.000180026	0.00106181	Up	Similar to Valosin-containing protein (Fragment).
Os11g0649300	0.43	1.78333	2.05217	0.000180154	0.0010623	Up	Hypothetical conserved gene.
Os07g0575000	2.67667	5.40667	1.0143	0.000181733	0.00107063	Up	Pathogenesis-related transcriptional factor/ERF DNA-binding domain containing protein.
Os02g0640500	3.84	8.64667	1.17104	0.000183105	0.00107732	Up	Lectin receptor-like kinase Mediation of salt sensitivity Regulation of ethylene homeostasis
Os10g0484400	1.31333	2.72333	1.05214	0.000183174	0.00107738	Up	Ribosomal protein L18/L5 domain containing protein.
Os04g0677000	1.52333	3.24667	1.09173	0.000188934	0.00110814	Up	Protein of unknown function DUF1677 Oryza sativa family protein.
Os10g0558900	1.94333	4.8	1.3045	0.00019096	0.00111859	Up	2OG-Fe (II) oxygenase family protein Regulation of the secondary cell wall formation in leaves Modulation of leaf rolling
MSTRG.33288	0.15	0.81	2.43296	0.000192457	0.00112633	Up	cell wall protein-like [Oryza sativa Indica Group]
Os04g0223300	2.68333	6.85333	1.35278	0.000194004	0.00113455	Up	Similar to Peroxisome type ascorbate peroxidase.
Os10g0547200	1.12333	4.12	1.87486	0.000195044	0.00113938	Up	Harpin-induced 1 domain containing protein.
Os05g0494200	135.28	309.163	1.19242	0.000195139	0.00113973	Up	Similar to Cystatin (Fragment).
Os09g0279300	0.0233333	1.03	5.46411	0.000198198	0.00115569	Up	Mitochondrial inner membrane translocase subunit Tim17/Tim22/Tim23/peroxisomal protein PMP24 domain containing protein.
Os04g0208500	0.001	0.186667	7.54432	0.000201743	0.00117486	Up	Cyclin-like F-box domain containing protein.
Os11g0684000	14.37	32.57	1.18048	0.000202696	0.00117916	Up	Similar to Transcription factor MYB21 (Myb-related protein 21) (AtMYB21) (Myb homolog 3) (AtMyb3).
Os10g0133500	0.0166667	0.35	4.39232	0.000202708	0.00117916	Up	Transferase family protein.
Os05g0162600	3.60333	7.22667	1.004	0.000206797	0.00120079	Up	Similar to Splicing factor RSZ33.
MSTRG.12129	2.34333	6.27667	1.42144	0.000215037	0.00124367	Up	--
Os09g0511200	1.67333	3.93333	1.23303	0.000216973	0.00125327	Up	Conserved hypothetical protein.
Os12g0104850	0.376667	1.67	2.14849	0.000223779	0.00128886	Up	Hypothetical gene.
MSTRG.17319	0.0533333	0.446667	3.06609	0.000225607	0.00129892	Up	--
Os01g0550800	96.7533	322.793	1.73823	0.000228806	0.00131591	Up	Protein of unknown function DUF239 plant domain containing protein.
Os06g0690600	24.1733	60.14	1.31491	0.000229338	0.0013185	Up	Conserved hypothetical protein.
MSTRG.27085	0.63	2.2	1.80408	0.000230796	0.00132544	Up	--
MSTRG.10145	0.0266667	0.396667	3.89482	0.000231333	0.00132782	Up	cell wall protein-like [Oryza sativa Indica Group]
Os06g0698300	2.70333	5.99333	1.14862	0.000237179	0.00135674	Up	Protein phosphatase 2C family protein.
Os08g0140500	14.58	32.14	1.14038	0.000237385	0.00135768	Up	Similar to Tryptophan decarboxylase (EC 4.1.1.28).
Os01g0779201	0.646667	4.67333	2.85336	0.000239569	0.0013687	Up	Hypothetical conserved gene.
Os11g0593900	0.173333	0.693333	2	0.000240819	0.00137436	Up	Hypothetical conserved gene.
Os03g0281500	3.11667	6.67667	1.09912	0.000241456	0.00137751	Up	Catharanthus roseus receptor-like kinase1-like kinase
Os03g0810500	1.63	5.61667	1.78484	0.000241919	0.00137941	Up	Hypothetical conserved gene.
MSTRG.4972	0.0433333	1.51333	5.12611	0.000242414	0.00138124	Up	--
Os08g0540900	2.58667	8.65667	1.74272	0.000244221	0.00139104	Up	Conserved hypothetical protein.
Os01g0152800	0.62	1.79667	1.53498	0.000245514	0.00139766	Up	Protein kinase core domain containing protein.
Os10g0524300	40.3267	87.6	1.1192	0.000247682	0.0014085	Up	LysM domain-containing protein Embryo sac development
MSTRG.32560	1.68	6.41	1.93186	0.000251567	0.00142704	Up	--
Os09g0268800	5.34	11.5067	1.10756	0.000252378	0.00143087	Up	Conserved hypothetical protein.
Os02g0712512	0.02	0.436667	4.44846	0.000256366	0.00145069	Up	Hypothetical protein.
Os04g0549400	6.76333	13.6933	1.01767	0.000259158	0.00146535	Up	Conserved hypothetical protein.
Os11g0454300	0.72	3.78667	2.39486	0.000264779	0.0014927	Up	Similar to Water-stress inducible protein RAB21.
Os05g0588850	0.123333	0.653333	2.40526	0.000265338	0.00149533	Up	ATPase AAA-type core domain containing protein.
MSTRG.31248	0.0333333	0.513333	3.94486	0.000268843	0.00151268	Up	cell wall protein-like [Oryza sativa Japonica Group]
MSTRG.11860	0.64	2.98333	2.22078	0.000271257	0.00152492	Up	--
Os10g0340301	0.666667	1.68667	1.33914	0.000274456	0.00154047	Up	Conserved hypothetical protein.
Os06g0157800	31.0233	66.42	1.09826	0.000274531	0.00154062	Up	Similar to CG7224 (Fragment).
Os03g0676300	2.61333	6.6	1.33657	0.000275118	0.0015431	Up	Similar to cold shock protein-1.
Os02g0802575	0.14	0.673333	2.26589	0.0002801	0.00156746	Up	Hypothetical protein.
Os05g0390300	1.62667	5.16667	1.66732	0.00028124	0.00157302	Up	Conserved hypothetical protein.
Os05g0438600	4.49	13.15	1.55028	0.00028301	0.00158116	Up	Fructose-1 6-bisphosphatase class 1/Sedoheputulose-1 7-bisphosphatase domain containing protein.
Os01g0298400	0.873333	2.75333	1.65657	0.000285945	0.00159458	Up	Myb transcription factor domain containing protein.
Os10g0162856	0.001	0.25	7.96578	0.000286505	0.00159717	Up	Similar to Chalcone and stilbene synthases N-terminal domain containing protein.
Os02g0175100	45.9067	94.2633	1.03799	0.000287815	0.00160305	Up	Similar to RISBZ4.
Os07g0245100	37.3933	77.5767	1.05284	0.000291492	0.00162212	Up	Similar to Cytosine deaminase (EC 3.5.4.1).
Os11g0670800	1.37667	2.95667	1.10279	0.000293733	0.00163185	Up	Similar to EAP30 family protein.
MSTRG.28828	0.1	0.916667	3.1964	0.000295993	0.00164345	Up	HGWP repeat containing protein-like [Oryza sativa Japonica Group]
Os04g0211900	0.001	0.23	7.84549	0.000301023	0.00166703	Up	Protein of unknown function DUF1677 Oryza sativa family protein.
MSTRG.28393	0.263333	1.09667	2.05816	0.000301584	0.00166985	Up	--
Os01g0104200	6.60667	16.5433	1.32426	0.000301789	0.00167031	Up	No apical meristem (NAM) protein domain containing protein.
Os04g0282200	1.38	2.82667	1.03443	0.000302027	0.00167114	Up	Protein of unknown function DUF1685 family protein.
Os01g0921000	0.893333	2.57333	1.52637	0.000302375	0.00167249	Up	Nucleotide-diphospho-sugar transferase domain containing protein.
Os09g0327500	0.13	0.846667	2.70328	0.000303641	0.00167803	Up	Conserved hypothetical protein.
MSTRG.12154	1.19	2.90333	1.28675	0.000306541	0.0016923	Up	--
Os01g0801800	2.78333	5.88	1.079	0.000312288	0.00172076	Up	Hypothetical gene.
Os03g0820400	1.83333	5.44333	1.57002	0.000313467	0.00172666	Up	Similar to ZPT2-13.
MSTRG.4991	0.0233333	0.546667	4.5502	0.000315131	0.00173403	Up	cell wall protein-like [Oryza sativa Japonica Group]
Os09g0547900	0.236667	0.896667	1.92172	0.000315286	0.00173459	Up	Hypothetical conserved gene.
Os12g0624100	0.39	1.22667	1.6532	0.000315426	0.00173506	Up	Similar to Small heat shock-like protein.
Os05g0574700	1.31667	3.01	1.19287	0.000317754	0.00174636	Up	Similar to cDNA clone:002-182-C01 full insert sequence.
Os03g0260600	2.22	4.60333	1.05212	0.000325417	0.00178326	Up	Helix-loop-helix DNA-binding domain containing protein.
Os06g0542000	1.04667	2.43667	1.21911	0.000325547	0.00178367	Up	Conserved hypothetical protein.
Os01g0609501	5.08	18.91	1.89625	0.000330155	0.00180458	Up	Hypothetical protein.
Os02g0598500	1.41333	2.86333	1.01859	0.000333622	0.00182167	Up	Protein phosphatase 2C family protein.
Os01g0186000	22.4567	48.0067	1.09609	0.000335724	0.0018322	Up	Similar to WRKY transcription factor 10.
MSTRG.31676	0.166667	1.17	2.81147	0.000342775	0.00186622	Up	--
Os11g0562600	0.001	0.353333	8.46489	0.000343811	0.00187059	Up	Conserved hypothetical protein.
Os04g0538400	0.306667	1.25333	2.03103	0.000345963	0.00188037	Up	Similar to Nodulin 21 (N-21).
Os05g0499100	2.01	7.28667	1.85806	0.000347239	0.00188667	Up	26 kDa globulin (Alpha-globulin).
Os12g0621500	0.163333	0.523333	1.67991	0.000352817	0.00191307	Up	Similar to IRE.
Os09g0327575	0.0566667	0.42	2.88982	0.000354215	0.00191967	Up	Similar to Pi5-1.
Os10g0491801	2.71333	8.3	1.61305	0.00035486	0.00192283	Up	Similar to ubiquitin.
Os02g0807300	0.926667	2.51	1.43756	0.000354919	0.00192283	Up	Hypothetical protein.
Os11g0220400	1.33667	2.78667	1.0599	0.000371553	0.00200344	Up	Similar to ATPase AAA family protein expressed.
Os11g0108650	1.18333	3.46	1.54792	0.000373177	0.00201118	Up	Similar to Laccase-23.
Os08g0534400	8.89	18.1533	1.02998	0.000379593	0.00204231	Up	EKC/KEOPS complex subunit Pcc1 domain containing protein.
Os01g0734000	31.7967	69.7933	1.13421	0.000379832	0.00204281	Up	Similar to WRKY DNA binding protein.
Os02g0607500	0.03	0.35	3.54432	0.000380349	0.002045	Up	Putative protein phosphatase 2C 22.
Os12g0419700	0.296667	0.933333	1.65355	0.000383039	0.00205738	Up	Hypothetical gene.
Os03g0310666	5.35333	13.49	1.33338	0.000394804	0.00211489	Up	Hypothetical protein.
Os02g0805100	2.50667	5.91	1.23739	0.000395932	0.00211915	Up	Similar to Auxin-responsive protein IAA12 (Indoleacetic acid-induced protein 12) (BODENLOS protein).
Os07g0199350	7.25333	19.56	1.43119	0.000396127	0.00211985	Up	Similar to HAT family dimerisation domain containing protein.
Os08g0434700	28.8267	64.84	1.16948	0.000397163	0.00212462	Up	Homeodomain-like containing protein.
Os01g0523100	0.001	0.103333	6.69116	0.000400164	0.00213966	Up	Protein kinase catalytic domain domain containing protein.
MSTRG.28983	0.29	0.753333	1.37724	0.000406478	0.00217015	Up	BKRF1 encodes EBNA-1 protein-like [Oryza sativa Japonica Group]
Os01g0186900	3.04667	10.3933	1.77035	0.000421252	0.00223818	Up	Similar to cDNA clone:001-117-G12 full insert sequence.
Os01g0229700	0.653333	1.64333	1.33073	0.000427335	0.00226597	Up	WD40 repeat domain containing protein.
Os02g0733900	0.91	3.17	1.80054	0.000433263	0.0022955	Up	Conserved hypothetical protein.
Os07g0555400	0.846667	1.78	1.07201	0.000433729	0.00229759	Up	Conserved hypothetical protein.
Os10g0128600	0.69	1.75	1.34269	0.000434021	0.00229876	Up	Cyclin-like F-box domain containing protein.
Os01g0823500	2.37667	5.32	1.16249	0.000435845	0.00230727	Up	Protein of unknown function DUF623 plant domain containing protein.
Os01g0588000	0.913333	3.33667	1.86919	0.000437606	0.00231544	Up	Heat shock protein Hsp20 domain containing protein.
Os11g0139600	0.0666667	0.46	2.7866	0.000440678	0.00233054	Up	Similar to GRAS family transcription factor containing protein.
Os03g0822000	2.98	6.38	1.09824	0.00044182	0.00233581	Up	Alpha-expansin OsEXPA7.
Os02g0484975	9.69	24.6467	1.34682	0.000446925	0.00235889	Up	Conserved hypothetical protein.
Os10g0413900	0.01	0.336667	5.07325	0.00045449	0.00239328	Up	No apical meristem (NAM) protein domain containing protein.
Os09g0422600	9.83	20.89	1.08755	0.000458168	0.00240839	Up	Protein of unknown function DUF566 family protein.
Os09g0473400	5.77667	12.45	1.10784	0.000458188	0.00240839	Up	Peptidase C12 ubiquitin carboxyl-terminal hydrolase 1 domain containing protein.
Os11g0204100	2.17333	4.41333	1.02196	0.000458492	0.00240959	Up	Conserved hypothetical protein.
Os07g0692200	3.96667	10.0867	1.34645	0.00045888	0.00241124	Up	Uncharacterised protein family UPF0497 trans-membrane plant domain containing protein.
Os10g0125300	0.516667	1.38333	1.42084	0.000462111	0.00242622	Up	F-box domain cyclin-like domain containing protein.
Os08g0402600	1.04333	2.1	1.00919	0.000468119	0.00245091	Up	Pentatricopeptide repeat domain containing protein.
Os02g0813166	3.36667	7.89333	1.22931	0.000469447	0.00245746	Up	Cyclin-like F-box domain containing protein.
MSTRG.31462	0.12	0.73	2.60486	0.000473073	0.00247401	Up	HGWP repeat containing protein-like [Oryza sativa Japonica Group]
Os04g0407300	0.196667	0.74	1.91177	0.0004736	0.00247636	Up	Conserved hypothetical protein.
Os09g0322300	1.12667	2.44667	1.11876	0.000477771	0.00249654	Up	Conserved hypothetical protein.
MSTRG.5072	0.37	1.43667	1.95713	0.000480242	0.0025074	Up	PREDICTED: F-box/FBD/LRR-repeat protein At1g16930-like isoform X2 [Oryza sativa Japonica Group]
Os07g0554900	0.466667	1.76333	1.91784	0.000481134	0.00251082	Up	Cyclin-like F-box domain containing protein.
Os04g0371600	0.356667	1.27667	1.83973	0.000483597	0.00252244	Up	Leucine-rich repeat cysteine-containing containing protein.
Os11g0303600	0.0166667	0.436667	4.71149	0.000488326	0.0025442	Up	Similar to Herbicide safener binding protein.
Os03g0730200	0.303333	1.75333	2.53112	0.000491085	0.00255649	Up	Hypothetical conserved gene.
Os05g0550250	2.71333	6.78667	1.32264	0.000493396	0.00256727	Up	Similar to seed maturation protein.
Os11g0645600	1.09	3.63	1.73564	0.000494712	0.00257328	Up	Hypothetical conserved gene.
Os01g0959200	5.11333	12.6	1.30109	0.000494827	0.00257346	Up	Similar to Ci21A protein.
Os10g0494300	0.001	0.133333	7.05889	0.000497151	0.0025847	Up	ATP binding cassette G transporter Regulation of male reproduction Anther cuticle development
MSTRG.2130	0.18	0.696667	1.95247	0.000505656	0.00262294	Up	BKRF1 encodes EBNA-1 protein,latent cycle gene-like [Oryza sativa Japonica Group]
Os05g0271300	0.706667	1.97333	1.48153	0.000508317	0.00263503	Up	Hypothetical conserved gene.
MSTRG.1492	0.206667	0.62	1.58496	0.000509544	0.00263861	Up	--
Os01g0880900	0.46	1.18333	1.36315	0.000509585	0.00263861	Up	Similar to Pentatricopeptide repeat protein PPR868-14.
MSTRG.17561	0.763333	1.63333	1.09743	0.000511482	0.00264629	Up	--
Os04g0373000	0.356667	1.63	2.19222	0.000522639	0.00269485	Up	Similar to OSIGBa0140A01.9 protein.
Os06g0224650	1.18667	2.53	1.09222	0.000523466	0.00269867	Up	Mitochodrial transcription termination factor-related family protein.
Os02g0301400	0.393333	0.96	1.28728	0.000527592	0.00271688	Up	Thioredoxin-like fold domain containing protein.
Os01g0206200	10.9833	28.9867	1.40007	0.000528344	0.00271894	Up	Conserved hypothetical protein.
Os01g0278000	1.51667	3.51667	1.2133	0.000530587	0.00272878	Up	VQ domain containing protein.
Os12g0615100	0.99	2.70667	1.45102	0.000535217	0.00274893	Up	Similar to Protein kinase domain containing protein expressed.
Os04g0481800	0.393333	1.52333	1.95341	0.000535279	0.00274893	Up	Membrane bound O-acyl transferase MBOAT family protein.
MSTRG.28952	2.21	4.70667	1.09066	0.000538997	0.00276491	Up	--
Os06g0185966	2.63667	6.09333	1.20852	0.000544291	0.0027867	Up	Similar to Glutathione peroxidase.
Os01g0898500	0.893333	13.3433	3.90078	0.000546238	0.00279532	Up	Similar to Patatin (Fragment).
MSTRG.2191	0.0666667	1.5	4.49185	0.000547451	0.00280063	Up	--
Os05g0324000	0.116667	0.526667	2.1745	0.000547877	0.00280192	Up	Conserved hypothetical protein.
Os03g0421700	0.396667	2.12	2.41807	0.000551312	0.00281678	Up	Similar to Fumarylacetoacetate hydrolase domain-containing protein 1.
Os10g0156200	0.0666667	0.81	3.60288	0.000552091	0.00281941	Up	Similar to Protein kinase domain containing protein.
Os01g0629500	0.25	1.58	2.65992	0.000554124	0.00282843	Up	Conserved hypothetical protein.
Os01g0793600	0.57	4.47333	2.97232	0.000555261	0.00283288	Up	Conserved hypothetical protein.
MSTRG.2734	0.0566667	0.48	3.08246	0.000581789	0.00295326	Up	cell wall protein-like [Oryza sativa Japonica Group]
Os01g0875300	13.2867	28.4467	1.09828	0.000591217	0.0029967	Up	Similar to Universal stress protein family protein.
Os06g0186000	1.09333	2.74667	1.32895	0.000602316	0.00304764	Up	Similar to Glutathione peroxidase.
Os07g0654100	0.51	1.03667	1.02338	0.000605085	0.00306068	Up	Hypothetical protein.
Os03g0259400	0.31	1.38	2.15433	0.000607637	0.00307116	Up	Similar to Leucoanthocyanidin reductase (EC 1.17.1.3) (Leucocyanidin reductase).
Os04g0395800	3.87333	8.43667	1.1231	0.000614294	0.00310137	Up	Tify domain containing protein.
Os09g0522800	1.15	2.95	1.35908	0.000633156	0.00318452	Up	Protein of unknown function DUF1618 domain containing protein.
Os01g0941500	0.373333	1.58	2.08139	0.000639954	0.00321517	Up	Similar to Beta-1 3-glucanase.
Os11g0463600	2.09	4.57333	1.12974	0.000642529	0.00322709	Up	Similar to FHA domain containing protein expressed.
Os04g0397400	4.33	9.08	1.06833	0.00064367	0.0032318	Up	Conserved hypothetical protein.
Os02g0739100	11.8	23.6233	1.00143	0.000646112	0.0032417	Up	Similar to Formin-like protein 16.
Os06g0195800	0.656667	1.79333	1.44941	0.000648325	0.0032516	Up	Similar to DNAJ heat shock N-terminal domain-containing protein.
Os04g0344100	0.1	0.596667	2.57693	0.000648771	0.00325333	Up	Similar to OSIGBa0106G08.3 protein.
Os08g0416800	32.39	65.7567	1.02159	0.000653264	0.00327175	Up	Conserved hypothetical protein.
MSTRG.28783	0.273333	1.25667	2.20087	0.00065412	0.00327537	Up	--
Os11g0143700	0.001	0.236667	7.88671	0.000656667	0.0032857	Up	Hypothetical conserved gene.
Os01g0918400	0.326667	1.84	2.49381	0.000664119	0.00331779	Up	Conserved hypothetical protein.
MSTRG.19559	1.58333	5.30667	1.74484	0.000670974	0.00334524	Up	--
MSTRG.31092	1.18667	3.4	1.51862	0.000675373	0.00336507	Up	--
Os02g0798800	0.83	2.08667	1.33002	0.000677217	0.00337215	Up	Leucine-rich repeat cysteine-containing subtype containing protein.
Os11g0701000	0.143333	1.19	3.05352	0.000682945	0.00339606	Up	Class III chitinase homologue
Os11g0607900	1.07	3.68667	1.78471	0.000682975	0.00339606	Up	Hypothetical conserved gene.
Os12g0414500	0.59	1.90667	1.69227	0.00069202	0.00343783	Up	Aminoacyl-tRNA synthetase class II (D K and N)-like domain containing protein.
Os01g0895000	4.01	9.65	1.26693	0.000692589	0.00343905	Up	Hypothetical protein.
Os07g0573200	2.12667	4.60333	1.11408	0.000715451	0.00353663	Up	Similar to Adenylyl-sulfate kinase.
MSTRG.14804	0.283333	1.19333	2.07442	0.000740807	0.00364617	Up	--
Os11g0152600	1.51667	3.28	1.11279	0.000744979	0.00366276	Up	Conserved hypothetical protein.
MSTRG.12368	0.0933333	0.566667	2.60204	0.000750708	0.00368638	Up	BKRF1 encodes EBNA-1 protein-like [Oryza sativa Japonica Group]
Os09g0446350	1.98	4.24333	1.0997	0.00075862	0.00372009	Up	Hypothetical conserved gene.
Os07g0117200	1.5	3.75667	1.32449	0.000762782	0.00373763	Up	NB-ARC domain containing protein.
Os05g0312600	1.32333	3.38667	1.35569	0.000773388	0.00377859	Up	EF-Hand type domain containing protein.
MSTRG.29847	0.1	1.65333	4.04731	0.000776965	0.00379433	Up	--
Os02g0808800	0.0533333	0.7	3.71425	0.000778309	0.00379915	Up	Similar to Cinnamoyl-CoA reductase (EC 1.2.1.44).
Os02g0595400	143.587	366.523	1.35198	0.000779387	0.00380325	Up	Conserved hypothetical protein.
Os08g0122400	0.001	0.48	8.90689	0.000779605	0.00380373	Up	Hypothetical protein.
MSTRG.1544	0.79	1.8	1.18807	0.000782725	0.00381487	Up	--
Os05g0535100	0.246667	0.866667	1.81291	0.000789959	0.00384544	Up	Similar to Beta-1 3-glucanase-like protein.
MSTRG.13564	0.526667	1.69333	1.6849	0.000790142	0.00384574	Up	PREDICTED: loricrin-like isoform X3 [Oryza sativa Japonica Group]
Os09g0479400	0.156667	0.516667	1.72154	0.00079043	0.00384656	Up	Phenylalanyl-tRNA synthetase class IIc family protein.
Os11g0683800	0.233333	1.33667	2.51818	0.000796751	0.00387378	Up	Pectin lyase fold/virulence factor domain containing protein.
MSTRG.26159	0.0566667	0.626667	3.46713	0.000800095	0.00388661	Up	PREDICTED: vegetative cell wall protein gp1-like [Oryza sativa Japonica Group]
Os08g0425100	0.0366667	0.353333	3.26849	0.000801552	0.00389238	Up	Dynamin family protein.
Os02g0110300	0.0633333	1.07	4.0785	0.000831165	0.00402395	Up	Conserved hypothetical protein.
Os12g0153700	0.676667	2.08333	1.62238	0.000838303	0.00405359	Up	Peptidase aspartic catalytic domain containing protein.
Os06g0148100	0.0833333	1	3.58496	0.000850868	0.0041064	Up	Conserved hypothetical protein.
MSTRG.27167	0.633333	1.46	1.20493	0.000870878	0.00419297	Up	--
Os04g0616300	34.7867	73.7567	1.08424	0.000884282	0.0042502	Up	Similar to H0525G02.10 protein.
Os08g0189500	123.477	253.92	1.04014	0.000884464	0.00425043	Up	Germin-like protein 8-6 Disease resistance
Os05g0166450	3.51667	7.71333	1.13315	0.000884832	0.00425092	Up	Hypothetical gene.
Os08g0427800	2.07	5.75667	1.4756	0.000890009	0.00427258	Up	Conserved hypothetical protein.
MSTRG.22612	1.15	3.37333	1.55254	0.000909516	0.00435445	Up	--
Os06g0549950	0.0133333	0.616667	5.53138	0.000911684	0.00436352	Up	Hypothetical protein.
Os01g0718000	1.93667	4.64333	1.26159	0.000912007	0.00436441	Up	Zinc finger AN1-type domain containing protein.
Os05g0198200	20.88	49.9	1.25692	0.000919642	0.004397	Up	Thioredoxin fold domain containing protein.
Os12g0246700	0.563333	1.15333	1.03375	0.000927305	0.00442767	Up	NB-ARC domain containing protein.
Os08g0234400	3.2	6.43	1.00675	0.00093736	0.00446967	Up	Hypothetical gene.
Os04g0611600	1.44667	3.00667	1.05543	0.000956322	0.00454787	Up	Hypothetical protein.
Os11g0518300	0.0466667	0.486667	3.38247	0.000957106	0.00454813	Up	Hypothetical protein.
Os04g0600100	2.42667	5.56	1.19611	0.000957748	0.00454923	Up	Similar to B0403H10-OSIGBa0105A11.3 protein.
Os03g0408600	0.846667	1.90667	1.17119	0.000961084	0.00456169	Up	GRAS-domain transcription factor Strigolactone (SL) biosynthesis
Os06g0237950	1.93333	3.87333	1.00249	0.00096863	0.00459136	Up	Conserved hypothetical protein.
Os01g0678100	0.236667	0.67	1.5013	0.000970724	0.00459924	Up	Protein of unknown function DUF2921 domain containing protein.
Os02g0765900	1.52	4.14333	1.44672	0.000975112	0.00461593	Up	Similar to Ferredoxin-nitrite reductase.
Os10g0157400	0.0733333	0.64	3.12553	0.000975727	0.00461678	Up	Serine/threonine protein kinase domain containing protein.
Os04g0269100	0.393333	1.39667	1.82816	0.000983359	0.00465014	Up	Similar to OSIGBa0135A16.7 protein.
Os07g0463500	0.0366667	0.793333	4.43539	0.000983626	0.00465071	Up	Similar to thioesterase family protein.
Os02g0618100	7.87333	18.4367	1.22753	0.000986073	0.00465677	Up	Similar to Glutaredoxin-C4 chloroplastic.
Os07g0286000	2.11667	4.54333	1.10196	0.000986548	0.00465833	Up	Hypothetical conserved gene.
Os02g0569000	10.66	26.6667	1.32283	0.000997217	0.00470106	Up	Cytochrome P450 family protein.
MSTRG.8132	0.0666667	0.42	2.65535	0.00100776	0.00473958	Up	cell wall protein-like [Oryza sativa Japonica Group]
Os02g0587600	0.001	0.553333	9.11201	0.00101913	0.00478599	Up	Conserved hypothetical protein.
MSTRG.21457	1.32333	2.98	1.17114	0.00102778	0.00482306	Up	--
Os03g0661800	0.23	0.946667	2.04122	0.00102956	0.00483074	Up	PDZ/DHR/GLGF domain containing protein.
Os01g0699600	1.83333	5.57	1.60321	0.00103831	0.00486179	Up	Serine/threonine protein kinase domain containing protein.
MSTRG.23237	0.12	0.716667	2.57827	0.00105173	0.00491957	Up	cell wall protein-like [Oryza sativa Indica Group]
Os02g0611000	0.583333	1.49333	1.35614	0.00106228	0.0049631	Up	Hypothetical gene.
Os03g0816700	0.0666667	0.706667	3.40599	0.00106695	0.00498129	Up	Tubby C-terminal domain containing protein.
Os03g0439650	0.143333	0.85	2.56809	0.00106922	0.00499041	Up	Hypothetical protein.
Os03g0204900	4.04667	11.72	1.53417	0.00107288	0.00500607	Up	Conserved hypothetical protein.
Os05g0569800	1.81	3.74	1.04705	0.00107604	0.0050186	Up	Tho complex subunit 7 domain containing protein.
MSTRG.31524	0.533333	1.20667	1.17792	0.00108527	0.00505719	Up	--
Os05g0530400	4.2	9.19667	1.13072	0.00108626	0.00505888	Up	Heat stress transcription factor Spl7 (Heat shock transcription factor) (Heat shock factor RHSF10).
MSTRG.33698	1.08	3.05667	1.50093	0.00109979	0.00511143	Up	--
Os10g0444500	0.123333	0.516667	2.06667	0.00110867	0.00515049	Up	Similar to Selenium binding protein.
Os05g0147150	4.28667	8.87667	1.05016	0.00111272	0.00516631	Up	Hypothetical conserved gene.
Os05g0266900	1.32333	2.77667	1.06918	0.00111425	0.00517188	Up	Hypothetical protein.
Os03g0786500	1.48667	3.32	1.1591	0.00112105	0.00519924	Up	Similar to Glycine-rich protein 2.
Os10g0566400	0.8	2.27667	1.50885	0.0011234	0.00520756	Up	Similar to RING-H2 finger protein ATL3J.
Os02g0123450	0.81	2.15	1.40834	0.00112605	0.00521755	Up	Hypothetical protein.
MSTRG.29287	0.643333	1.76667	1.45739	0.00113164	0.00523889	Up	PREDICTED: 23.2 kDa heat shock protein [Oryza sativa Japonica Group]
Os11g0444700	10.7867	29.1133	1.43243	0.00114365	0.00529297	Up	Octicosapeptide/Phox/Bem1p domain containing protein.
MSTRG.26962	1.18333	3.2	1.43522	0.0011479	0.00531034	Up	--
Os02g0729350	0.773333	1.83667	1.24793	0.00119514	0.00550015	Up	Hypothetical conserved gene.
Os11g0444900	3.09667	7.54667	1.28512	0.00120463	0.00553549	Up	Octicosapeptide/Phox/Bem1p domain containing protein.
MSTRG.26326	0.136667	0.953333	2.80232	0.0012075	0.0055451	Up	keratin, type I cytoskeletal 9-like [Aegilops tauschii subsp. tauschii] [Aegilops tauschii]
Os02g0508100	30.2067	61.6767	1.02986	0.00122069	0.0055944	Up	Similar to OSIGBa0075F02.3 protein.
Os03g0729700	0.92	2.00667	1.1251	0.00122486	0.00560951	Up	Ribosomal RNA small subunit methyltransferase E domain containing protein.
Os01g0220500	1.56333	4.66333	1.57674	0.00123682	0.00565534	Up	Similar to predicted protein.
Os10g0126600	1.18333	2.53667	1.10008	0.00123809	0.00565991	Up	Cyclin-like F-box domain containing protein.
Os02g0227500	0.001	0.216667	7.75933	0.00125603	0.00572763	Up	Protein kinase catalytic domain domain containing protein.
Os03g0323600	13.0133	35.7667	1.45863	0.00125909	0.00573827	Up	Similar to DnaJ domain containing protein expressed.
Os09g0544700	0.456667	1.51	1.72534	0.0012594	0.00573887	Up	Protein of unknown function DUF674 domain containing protein.
Os11g0576400	0.0133333	0.28	4.39232	0.00128437	0.00583849	Up	Similar to HAT family dimerisation domain containing protein expressed.
Os03g0396200	0.396667	1.00667	1.34359	0.00129173	0.00586944	Up	Hypothetical conserved gene.
MSTRG.34363	1.41667	2.98	1.07281	0.00129309	0.00587146	Up	F-box domain containing protein, expressed [Oryza sativa Japonica Group]
Os12g0117100	2.26667	5.12	1.17557	0.00130526	0.00591832	Up	Alpha/beta hydrolase fold-1 domain containing protein.
Os10g0470100	1.81333	4.58	1.3367	0.00130942	0.00593295	Up	Conserved hypothetical protein.
MSTRG.19282	0.12	0.82	2.77259	0.00131381	0.0059495	Up	--
Os04g0547600	0.08	0.533333	2.73697	0.00131612	0.00595892	Up	Pathogenesis-related transcriptional factor and ERF domain containing protein.
Os02g0661900	3.66333	7.57667	1.04841	0.00132741	0.00600257	Up	Similar to OSIGBa0143N19.13 protein.
Os11g0255300	0.001	0.206667	7.69116	0.00133405	0.00602917	Up	Cysteine endopeptidase (Cysteine proteinase (EC 3.4.22.-)-rice).
Os01g0184050	0.29	1.19	2.03684	0.00134023	0.00605281	Up	Hypothetical protein.
Os08g0495300	0.233333	1.03667	2.15149	0.00134671	0.00607694	Up	Similar to cDNA clone:J013000K10 full insert sequence.
Os01g0873000	0.001	0.476667	8.89684	0.00135498	0.00610733	Up	Hypothetical conserved gene.
Os05g0373900	0.446667	1.17667	1.39744	0.00135536	0.00610818	Up	Similar to Eukaryotic peptide chain release factor subunit 1 (eRF1) (Eukaryotic release factor 1) (TB3-1) (Cl1 protein).
MSTRG.3795	0.62	2.61667	2.07739	0.00135965	0.00612175	Up	--
Os12g0484600	8.06	19.0833	1.24346	0.00136824	0.00615323	Up	Nodule-specific protein-like.
Os05g0584400	1.43667	3.67333	1.35436	0.00137288	0.00617137	Up	Conserved hypothetical protein.
MSTRG.4668	0.29	1.07	1.88349	0.00139973	0.0062678	Up	--
Os06g0201200	2.43333	6.01	1.30443	0.0014036	0.00628128	Up	Conserved hypothetical protein.
Os05g0461900	0.693333	1.73333	1.32193	0.00142228	0.00635246	Up	Metal tolerance protein 6.
Os12g0281300	3.64333	7.99333	1.13354	0.00143114	0.00638413	Up	Pi-ta protein belonging to the nucleotide-binding site leucine-rich repeat (NBS-LRR) class Rice blast resistance (Nipponbare: susceptible)
Os01g0950300	64.6433	149.587	1.21041	0.00143117	0.00638413	Up	Conserved hypothetical protein.
MSTRG.25823	0.213333	1.42333	2.73809	0.00144199	0.00642253	Up	--
Os03g0437600	21.1933	47.1867	1.15477	0.00144281	0.00642529	Up	Similar to Hydrolase.
Os04g0578000	4.48	9.22333	1.04179	0.00144353	0.00642578	Up	ACC synthase Ethylene biosynthesis
Os08g0150700	1.15	3.09667	1.42908	0.00144823	0.00644583	Up	Cyclin-like F-box domain containing protein.
Os07g0209500	0.446667	1.94333	2.12126	0.00145326	0.00646551	Up	Similar to DNA polymerase.
Os02g0810600	0.02	0.456667	4.51307	0.00146155	0.00649967	Up	Hypothetical conserved gene.
MSTRG.912	0.106667	1.40333	3.71768	0.00146303	0.00650532	Up	--
Os02g0211800	0.423333	0.98	1.21099	0.00146524	0.00651336	Up	Hypothetical conserved gene.
Os02g0818900	9.48	24.2333	1.35403	0.00146751	0.0065224	Up	Heavy metal transport/detoxification protein domain containing protein.
Os10g0159300	3.57	8.31	1.21892	0.00146768	0.0065224	Up	Conserved hypothetical protein.
Os03g0734500	0.796667	2.62333	1.71935	0.00146817	0.00652366	Up	Conserved hypothetical protein.
Os05g0119100	14.47	35.45	1.29272	0.00147175	0.00653559	Up	Hypothetical protein.
Os12g0183100	29.33	65.9767	1.16958	0.00149211	0.00661165	Up	Similar to Branched chain alpha-keto acid dehydrogenase E1-alpha subunit (Fragment).
Os02g0219050	0.0633333	0.43	2.7633	0.00150717	0.00666727	Up	Hypothetical conserved gene.
Os12g0144200	0.65	2.1	1.69188	0.00150764	0.00666844	Up	Similar to Jasmonate-induced protein.
MSTRG.29630	0.256667	1.31	2.3516	0.00151216	0.00668286	Up	PREDICTED: SOSS complex subunit B homolog isoform X2 [Oryza sativa Japonica Group]
Os08g0148600	5.49333	13.31	1.27676	0.00153685	0.00678167	Up	Similar to Endoribonuclease Dicer homolog 3a.
Os03g0282100	0.01	0.193333	4.27302	0.00155721	0.00686239	Up	Similar to ATPase coupled to transmembrane movement of substances.
Os02g0749700	4.32	14.9567	1.79169	0.00156759	0.00690207	Up	Laccase Lignin biosynthesis Response to Cu stress of rice roots
Os10g0360100	0.873333	2.56	1.55154	0.00156864	0.00690547	Up	Similar to Sugar transporter protein.
Os09g0343200	1.12667	2.93	1.37884	0.00156972	0.00690859	Up	Ankyrin repeat containing protein.
MSTRG.30820	0.54	1.10667	1.03519	0.00157803	0.00693944	Up	--
Os01g0760300	0.356667	1.07667	1.59392	0.0015842	0.00696465	Up	Similar to Pollen-specific kinase partner protein.
Os11g0202450	0.113333	0.753333	2.73272	0.0015911	0.00698821	Up	Hypothetical protein.
Os02g0173600	0.256667	0.733333	1.51457	0.00159558	0.00700404	Up	Similar to Dreg-2 like protein.
Os11g0186300	0.001	0.0766667	6.26053	0.00160561	0.00704134	Up	Similar to Ankyrin-like protein.
Os04g0691900	0.0466667	0.273333	2.5502	0.00163918	0.00716786	Up	Chaperonin Cpn60/TCP-1 family protein.
MSTRG.26356	0.313333	1.11333	1.82912	0.00166039	0.00725466	Up	--
Os10g0504500	0.0133333	0.326667	4.61471	0.00167134	0.00729455	Up	Conserved hypothetical protein.
Os06g0133300	3.52667	8.16333	1.21085	0.00168271	0.00734113	Up	Hypothetical conserved gene.
Os01g0116200	0.346667	1.04667	1.59418	0.00168438	0.00734643	Up	Protein kinase core domain containing protein.
MSTRG.21295	0.816667	3.38667	2.05205	0.00169676	0.0073906	Up	--
Os05g0419301	0.423333	1.77	2.06388	0.00170849	0.00743434	Up	Hypothetical gene.
Os02g0160800	0.176667	0.713333	2.01355	0.00171289	0.00744942	Up	Hypothetical protein.
Os08g0136700	0.516667	3.33333	2.68966	0.00176456	0.00764605	Up	Protein of unknown function DUF26 domain containing protein.
MSTRG.12331	0.453333	1.07	1.23897	0.00176604	0.0076514	Up	--
Os05g0466200	0.25	0.633333	1.34104	0.00177278	0.00767645	Up	KIP1-like domain containing protein.
Os05g0511050	0.436667	1.14333	1.38864	0.00177748	0.00769367	Up	Similar to aspartyl protease family protein.
Os02g0484950	6.90333	16.76	1.27966	0.00178776	0.00773396	Up	Hypothetical conserved gene.
Os01g0719125	0.643333	1.90667	1.56741	0.00178929	0.0077382	Up	Hypothetical protein.
Os11g0527100	0.563333	1.52667	1.43832	0.00180383	0.00779189	Up	Conserved hypothetical protein.
Os05g0409100	2.56	6.32	1.30378	0.00180549	0.00779692	Up	Similar to predicted protein.
MSTRG.2182	0.413333	2.68333	2.69865	0.00180978	0.00781407	Up	--
Os04g0674100	1.13333	2.40667	1.08646	0.00182301	0.00786303	Up	Tetratricopeptide-like helical domain containing protein.
Os05g0477500	0.186667	0.703333	1.91374	0.00183295	0.00789738	Up	Protein of unknown function DUF3615 domain containing protein.
Os09g0480600	11.35	23.3767	1.04238	0.00186943	0.00802643	Up	Conserved hypothetical protein.
Os11g0444800	1.62	4.23667	1.38694	0.00188673	0.00809198	Up	Conserved hypothetical protein.
Os01g0782800	0.001	0.126667	6.98489	0.00189183	0.00811167	Up	Similar to Cyclic nucleotide-gated ion channel 4 (AtCNGC4) (Cyclic nucleotide-and calmodulin-regulated ion channel 4) (AtHLM1).
Os07g0523965	3.74333	12.4433	1.73298	0.00189766	0.00813121	Up	Similar to Glucose-6-phosphate/phosphate-translocator precursor.
MSTRG.6362	0.266667	0.96	1.848	0.00190341	0.00815148	Up	--
Os07g0565800	0.31	1.31333	2.08289	0.00190737	0.00816737	Up	Similar to LLA-115.
Os05g0101600	3.10333	6.42	1.04875	0.00191001	0.00817317	Up	Cytochrome P450 family protein.
Os03g0296600	1.07	3.93	1.87692	0.00192342	0.00822506	Up	Similar to ECA1 protein.
Os03g0281466	2.85333	5.79	1.02092	0.00193892	0.00828359	Up	Hypothetical protein
Os10g0158400	0.001	0.2	7.64386	0.00193928	0.008284	Up	Similar to Chalcone and stilbene synthases N-terminal domain containing protein.
MSTRG.9494	1.87667	4.39	1.22605	0.0019548	0.00834473	Up	--
Os06g0698400	0.126667	1.03	3.02354	0.00197818	0.00843551	Up	RNA recognition motif domain domain containing protein.
Os01g0969700	1.93333	4.04667	1.06564	0.00198338	0.00845543	Up	Protein kinase-like domain containing protein.
Os01g0743500	0.12	0.476667	1.98995	0.00199989	0.00851445	Up	Cytosolic NADP malic enzyme.
Os05g0584450	2.05333	4.58667	1.15948	0.00202229	0.00860067	Up	Hypothetical gene.
Os11g0167500	0.37	1.11	1.58496	0.00203626	0.00865086	Up	Similar to Serine esterase family protein expressed.
Os02g0176900	0.616667	1.79667	1.54276	0.00203776	0.00865493	Up	Similar to apospory-associated protein C.
Os07g0468100	4.60667	9.71667	1.07674	0.00206128	0.00873858	Up	Similar to Glutathione S-transferase GST 19 (EC 2.5.1.18).
Os01g0971800	1.13	2.87	1.34473	0.00207301	0.00878015	Up	Transcription factor with a GARP DNA-binding domain Photoperiodic control of flowering time Clock associated-component
Os06g0534200	3.95333	11.7167	1.56742	0.00207975	0.008804	Up	Conserved hypothetical protein.
Os01g0585400	1.12	2.8	1.32193	0.0021094	0.00890946	Up	Similar to DDB1A (DAMAGED DNA BINDING PROTEIN 1A)%3B DNA binding / protein binding.
Os01g0873100	0.803333	2.87333	1.83865	0.00211296	0.00892333	Up	Similar to Amidophosphoribosyltransferase chloroplast precursor (EC 2.4.2.14) (Glutamine phosphoribosylpyrophosphate amidotransferase) (ATASE) (GPAT).
MSTRG.31251	0.703333	1.62333	1.20668	0.00212308	0.00896012	Up	--
Os03g0383600	0.463333	1.93667	2.06345	0.00212749	0.00897636	Up	Thiolase-like subgroup domain containing protein.
MSTRG.10022	0.33	1.24667	1.91754	0.00213831	0.00901605	Up	--
Os11g0340477	2.74333	8.14667	1.57028	0.00213915	0.00901722	Up	Zinc finger C2H2-type domain containing protein.
Os01g0179901	0.243333	1.16667	2.26139	0.00216381	0.00910676	Up	Conserved hypothetical protein.
Os05g0583950	0.886667	2.02	1.18789	0.00216512	0.00911107	Up	Hypothetical conserved gene.
MSTRG.18761	1.09333	2.22667	1.02615	0.00220789	0.00926423	Up	PREDICTED: probable prolyl 4-hydroxylase 4 [Oryza sativa Japonica Group]
Os11g0481301	0.73	3.09	2.08164	0.00222877	0.00933099	Up	Hypothetical gene.
Os02g0123300	21.9767	44.45	1.01621	0.00223617	0.00935953	Up	Eukaryotic translation initiation factor 3 subunit 8 N-terminal domain containing protein.
Os04g0684900	16.1867	33.3533	1.04303	0.00223917	0.00936838	Up	Component of the CCR4-NOTcomplex Deadenylase Deadenylation (poly(A) tail shortening) Development and stress response
Os04g0513900	1.60333	6.86333	2.09784	0.00225411	0.00942348	Up	Glycoside hydrolase family 1 protein.
Os07g0654500	0.61	1.25667	1.04272	0.00226601	0.0094695	Up	Hypothetical protein.
Os05g0328000	1.20333	2.85667	1.2473	0.00227329	0.00949375	Up	Hypothetical protein.
Os03g0799300	0.0766667	0.683333	3.15592	0.00228125	0.00952425	Up	Conserved hypothetical protein.
Os05g0533301	0.35	1.37667	1.97575	0.00228969	0.00955223	Up	Conserved hypothetical protein.
Os01g0822001	0.546667	1.80333	1.72193	0.00229643	0.00957658	Up	Hypothetical gene.
Os03g0389100	1.15	2.86	1.31438	0.00231522	0.00963861	Up	Peptidase C14 caspase catalytic domain containing protein.
Os03g0670700	1397.66	3466.96	1.31066	0.00232095	0.00966121	Up	Similar to Glycine-rich RNA-binding abscisic acid-inducible protein.
MSTRG.9695	0.001	0.103333	6.69116	0.00232862	0.00968936	Up	TNP2-like protein [Oryza sativa Japonica Group]
Os10g0476500	0.956667	2.01333	1.0735	0.00234739	0.00975855	Up	Conserved hypothetical protein.
Os02g0152400	5.04667	12.6833	1.32953	0.00236615	0.00982373	Up	Rubisco small subunit 1 Reguration of Rubisco catalytic activity
MSTRG.9875	1.04667	2.15667	1.043	0.00238876	0.0099009	Up	--
Os03g0185400	0.89	1.78667	1.00539	0.00241157	0.00998379	Up	Protein of unknown function DUF1677 Oryza sativa family protein.
Os03g0766800	2.1	6.64	1.66079	0.00243918	0.0100759	Up	Conserved hypothetical protein.
Os04g0580800	23.7833	47.8833	1.00957	0.00246222	0.0101606	Up	Zinc finger RING/FYVE/PHD-type domain containing protein.
Os10g0549700	0.001	0.49	8.93664	0.00247053	0.0101857	Up	Protein of unknown function DUF3615 domain containing protein.
Os05g0498900	0.753333	1.54333	1.03469	0.00248578	0.010234	Up	Serine/threonine protein kinase domain containing protein.
Os04g0371100	0.896667	2.80667	1.64621	0.00249217	0.0102563	Up	Similar to OSIGBa0134J07.7 protein.
Os08g0128000	1.52667	3.18667	1.06166	0.00249601	0.0102682	Up	Galactose oxidase/kelch beta-propeller domain containing protein.
Os05g0380200	3.13	6.57	1.06973	0.00250023	0.0102815	Up	Conserved hypothetical protein.
Os12g0427600	0.0266667	0.256667	3.26679	0.00252406	0.0103635	Up	Similar to Subtilase.
MSTRG.17648	1.47333	3.27667	1.15315	0.00254612	0.0104367	Up	PREDICTED: probable inactive leucine-rich repeat receptor-like protein kinase At1g66830 [Brachypodium distachyon]
Os05g0581900	6.78667	17.7333	1.38569	0.00256361	0.0104989	Up	X8 domain containing protein.
Os07g0116800	1.29333	3.32	1.36009	0.00258191	0.0105617	Up	Hypothetical conserved gene.
MSTRG.19986	0.353333	1.30333	1.8831	0.00259183	0.0105996	Up	--
MSTRG.29448	1.04	2.50333	1.26727	0.00262434	0.0106997	Up	PREDICTED: F-box protein At5g07610-like [Oryza brachyantha]
MSTRG.5378	0.0166667	0.44	4.72247	0.00262526	0.010702	Up	cell wall protein-like [Oryza sativa Japonica Group]
Os02g0631100	2.35	4.77333	1.02234	0.00263437	0.0107351	Up	Photosystem II oxygen evolving complex protein PsbQ family protein.
Os01g0548600	1.29333	2.95667	1.19288	0.00266668	0.0108529	Up	Protein kinase catalytic domain domain containing protein.
Os11g0517400	0.763333	1.72	1.17202	0.00268674	0.0109123	Up	Conserved hypothetical protein.
MSTRG.21469	0.176667	1.45667	3.04357	0.00271074	0.0110028	Up	--
Os07g0204400	13.1867	31.8267	1.27116	0.00272781	0.0110608	Up	Conserved hypothetical protein.
Os01g0299100	0.35	1.26667	1.85561	0.00273306	0.0110779	Up	Conserved hypothetical protein.
Os03g0660500	0.0133333	0.66	5.62936	0.00277963	0.0112418	Up	Auxin responsive SAUR protein domain containing protein.
MSTRG.4224	0.001	0.333333	8.38082	0.0027829	0.0112499	Up	--
Os06g0581500	0.27	0.633333	1.23001	0.00278966	0.0112715	Up	Protein kinase core domain containing protein.
Os07g0575733	0.683333	2.45667	1.84604	0.00281324	0.0113596	Up	Conserved hypothetical protein.
Os01g0702000	0.523333	1.3	1.31271	0.00281737	0.0113749	Up	Protein of unknown function DUF151 domain containing protein.
MSTRG.33310	0.33	0.82	1.31316	0.0028281	0.0114124	Up	NBS-LRR-like resistance protein, partial [Oryza sativa]
Os06g0239200	34.1533	77.04	1.17358	0.00283068	0.0114214	Up	Conserved hypothetical protein.
Os11g0467966	0.303333	1.04333	1.78222	0.00283785	0.0114402	Up	Hypothetical protein.
Os06g0681100	0.153333	0.543333	1.82517	0.00285914	0.0115086	Up	Hypothetical conserved gene.
Os03g0437100	2.78667	8.11333	1.54175	0.00287818	0.0115779	Up	C2H2 zinc finger protein Transcriptional repressor Drought tolerance Positive regulation of plant growth and productivity
Os03g0601000	0.353333	1.02333	1.53417	0.00288248	0.0115909	Up	Conserved hypothetical protein.
Os11g0601950	0.163333	1.10667	2.76033	0.00288576	0.0116011	Up	Similar to cDNA clone:002-114-B06 full insert sequence.
MSTRG.10150	0.001	0.236667	7.88671	0.00294249	0.0117936	Up	--
Os08g0191800	0.163333	0.693333	2.08573	0.00295201	0.0118199	Up	Similar to Tyrosyl-tRNA synthetase.
Os06g0339800	7.28667	14.9733	1.03906	0.00297318	0.0118912	Up	Ribosomal protein L30 bacterial family protein.
Os09g0546200	1.35	3.01667	1.16	0.00298534	0.0119294	Up	Similar to auxin induced protein.
MSTRG.755	0.24	1.57667	2.71577	0.00300332	0.0119923	Up	--
MSTRG.8088	0.976667	2.82	1.52976	0.00300445	0.0119953	Up	--
Os03g0216000	0.156667	0.48	1.61534	0.00303383	0.0120884	Up	Similar to Zinc-finger protein KNUCKLES.
Os07g0628700	0.00666667	0.203333	4.93074	0.00304729	0.0121329	Up	Similar to Receptor protein kinase.
Os03g0401951	1.87	3.86667	1.04805	0.00305452	0.0121541	Up	Hypothetical gene.
Os11g0202200	0.663333	1.33667	1.01083	0.00307867	0.012235	Up	Cyclin-like F-box domain containing protein.
Os04g0404000	0.001	0.453333	8.82443	0.0030834	0.0122508	Up	Hypothetical gene.
Os02g0248200	0.436667	1.32667	1.6032	0.00309817	0.0123049	Up	Zinc finger RING-type domain containing protein.
Os10g0550400	0.136667	0.676667	2.30778	0.00311591	0.0123613	Up	Conserved hypothetical protein.
Os01g0154000	0.553333	1.46333	1.40304	0.00314243	0.0124451	Up	Conserved hypothetical protein.
Os02g0572351	1.88333	4.48667	1.25236	0.00316696	0.0125251	Up	Hypothetical protein.
Os07g0499800	1.92667	4.34	1.17159	0.0031869	0.0125978	Up	Ubiquitin-protein ligase E3 MDM2 domain containing protein.
Os01g0266400	3.91	8.43	1.10836	0.00319649	0.0126326	Up	Conserved hypothetical protein.
Os10g0430600	1.28667	2.98333	1.21329	0.00322569	0.012729	Up	Aminotransferase class-II pyridoxal-phosphate binding site domain containing protein.
Os07g0523600	3.42	10.8933	1.67138	0.00323656	0.0127625	Up	Similar to Glucose-6-phosphate/phosphate-translocator precursor.
Os05g0435400	0.673333	2.12333	1.65694	0.00324689	0.0127937	Up	Conserved hypothetical protein.
Os12g0230200	0.0566667	0.28	2.30485	0.00329376	0.0129548	Up	Similar to Protein kinase-like protein.
MSTRG.32135	3.95	8.95	1.18004	0.00329995	0.012974	Up	--
Os11g0172350	0.0666667	0.58	3.12102	0.00334725	0.0131406	Up	Similar to Protein kinase domain containing protein.
MSTRG.19710	0.0233333	0.32	3.77761	0.00335622	0.0131713	Up	--
Os11g0502700	20.27	48.0867	1.24629	0.00336191	0.01319	Up	Glycosyl transferase family 31 domain containing protein.
Os05g0155800	0.133333	0.54	2.01792	0.00336864	0.0132148	Up	Similar to OSIGBa0157A06.5 protein.
Os04g0121300	0.0866667	0.516667	2.57568	0.0033901	0.013281	Up	Similar to OSIGBa0115D20.4 protein.
MSTRG.27682	0.266667	1.41333	2.40599	0.00341048	0.0133445	Up	--
Os01g0342750	1.46667	2.99333	1.02921	0.00341844	0.0133701	Up	Hypothetical conserved gene.
Os01g0686000	3.71333	13.01	1.80883	0.00344521	0.0134573	Up	Similar to cDNA clone: J100026I16 full insert sequence.
Os06g0349800	5.4	11.1733	1.04903	0.00347595	0.0135708	Up	Conserved hypothetical protein.
Os05g0464001	7.18	14.88	1.05132	0.00347821	0.0135763	Up	Conserved hypothetical protein.
Os07g0523400	0.28	1.7	2.60204	0.00350128	0.0136546	Up	Glucose-6-phosphate/phosphate-translocator precursor.
Os08g0482300	4.42333	14.26	1.68877	0.00353103	0.0137542	Up	Pistil-specific extensin-like protein domain containing protein.
Os01g0880850	0.0533333	0.51	3.25739	0.00359633	0.0139799	Up	Hypothetical protein.
Os06g0329300	3.54	9.08667	1.36	0.00362784	0.0140796	Up	Conserved hypothetical protein.
Os07g0218700	3.19	9.40667	1.56013	0.00363082	0.0140842	Up	Cytochrome P450 family protein.
Os01g0975000	1.78333	3.61667	1.02008	0.0036323	0.0140865	Up	Protein of unknown function DUF966 family protein.
Os02g0753700	2.12	5.02333	1.24458	0.00363792	0.0141015	Up	VQ domain containing protein.
Os03g0743800	0.323333	0.693333	1.10053	0.00367759	0.0142207	Up	Similar to predicted protein.
Os11g0527150	0.276667	0.74	1.41938	0.00369086	0.0142597	Up	Hypothetical gene.
Os11g0425100	0.0566667	0.263333	2.21632	0.00370574	0.0143088	Up	Peptidase C1A papain family protein.
Os11g0587600	42.1767	86.71	1.03975	0.00376589	0.01452	Up	Similar to PDR-like ABC transporter.
Os02g0144200	0.67	1.49667	1.15952	0.00380865	0.0146654	Up	Protein of unknown function DUF1677 Oryza sativa family protein.
Os03g0735150	0.08	0.37	2.20945	0.00382918	0.0147249	Up	Hypothetical protein.
Os11g0210600	4.20667	9.55667	1.18383	0.00384595	0.014777	Up	Similar to Alcohol dehydrogenase (Fragment).
Os02g0467000	2.60333	6.26	1.2658	0.00386934	0.0148579	Up	Similar to trans-cinnamate 4-monooxygenase.
Os05g0421900	0.413333	1.17333	1.50524	0.00387279	0.0148676	Up	GA 20-oxidase4 GA metabolism
Os01g0754700	0.506667	1.07333	1.08299	0.00390399	0.0149783	Up	Pentatricopeptide repeat domain containing protein.
Os11g0588100	0.3	0.953333	1.66802	0.0039113	0.015001	Up	Similar to Integral membrane protein DUF6 containing protein expressed.
MSTRG.21978	0.826667	1.68	1.02308	0.00391361	0.0150081	Up	prephenate dehydratase-like [Oryza sativa Japonica Group]
Os09g0555800	1.36667	3.58333	1.39064	0.00398041	0.0152204	Up	Similar to AMP-binding protein (Adenosine monophosphate binding protein 6 AMPBP6).
Os01g0793701	0.896667	2.76333	1.62377	0.00400517	0.0153004	Up	Hypothetical protein.
Os06g0694300	0.68	1.38333	1.02454	0.00403757	0.0154168	Up	Pentatricopeptide repeat domain containing protein.
Os11g0209450	0.383333	1	1.38333	0.00405469	0.0154711	Up	Hypothetical protein.
MSTRG.27712	0.14	1.15333	3.04231	0.00410497	0.0156461	Up	--
Os08g0520850	1.89	4.54667	1.26642	0.00412322	0.0157025	Up	Similar to chaperone protein dnaJ-related.
Os02g0194600	0.0466667	0.323333	2.79256	0.00414451	0.0157667	Up	Protein kinase catalytic domain domain containing protein.
Os11g0577700	0.02	0.193333	3.27302	0.004147	0.0157743	Up	Tetratricopeptide-like helical domain containing protein.
MSTRG.11850	0.586667	1.72	1.5518	0.00416424	0.0158267	Up	--
Os07g0604700	1.38333	39.1767	4.82377	0.00419174	0.0159066	Up	B12D-like protein Flooding tolerance during seed germination and early seedling growth
Os11g0702300	0.0566667	0.823333	3.8609	0.00420921	0.0159634	Up	Zinc finger C2H2-type domain containing protein.
[truncated: 308 more rows]

## Sheet: Down-regulated DEGs in shoots
Table S4. DEGs with expression not recovered after sulfate resupply: Down-regulagted DEGs in shoots
Gene ID	CK_Sh_mean	S0_Sh_mean	log2(FC)	P_Value	FDR	Regulation Pattern	Annotation
Os12g0438600	82.8767	17.4967	-2.24389	1.20398e-93	3.57149e-90	Down	Similar to chloride channel protein.
Os12g0583300	12.9633	0.9	-3.84837	2.11382e-51	2.16222e-48	Down	Peptidase aspartic catalytic domain containing protein.
Os01g0720500	1168.75	389.593	-1.58492	1.06057e-38	7.67335e-36	Down	Similar to Type I chlorophyll a/b-binding protein b (Fragment).
Os03g0121200	69.3933	30.9133	-1.16657	1.34127e-31	6.12114e-29	Down	Similar to Peroxidase 1.
Os05g0517200	17.2733	7.93667	-1.12194	8.56062e-31	3.62774e-28	Down	HAD-superfamily hydrolase subfamily IIB protein.
Os01g0357100	471.177	180.283	-1.386	3.66437e-30	1.46892e-27	Down	Ferredoxin-nitrite reductase Nitrate reduction (assimilation) Determination of regeneration ability
Os01g0368900	17.0933	2.66	-2.68394	8.96534e-30	3.40959e-27	Down	Similar to Glutaredoxin-C1.
Os08g0389700	360.873	178.703	-1.01393	2.27487e-29	8.43521e-27	Down	Conserved hypothetical protein.
Os08g0562500	64.5767	25.17	-1.35931	1.09298e-28	3.8598e-26	Down	BAHD acyltransferase-like protein Control of grain size and leaf angle Regulation of brassinosteroid homeostasis
Os01g0631700	32.6333	11.3933	-1.51816	1.08977e-26	3.40284e-24	Down	Similar to Ser Thr specific protein kinase-like protein.
Os03g0703100	48.43	23.6133	-1.0363	2.68727e-26	7.97151e-24	Down	Similar to Beta-glucosidase.
Os07g0568700	99.7933	34.39	-1.53695	2.53199e-25	7.01953e-23	Down	Polygalacturonase-inhibiting protein Inhibitor of fungal polygalacturonase Regulation of floral organ number
Os03g0710700	26.6267	12.0233	-1.14703	1.16675e-24	3.11806e-22	Down	Similar to predicted protein.
Os05g0586050	17.0233	5.67667	-1.5844	1.99809e-24	5.11963e-22	Down	Protein of unknown function DUF247 plant domain containing protein.
Os12g0613250	18.2367	8.48	-1.10471	3.71884e-24	9.19298e-22	Down	Similar to BTB/POZ%3B Superoxide dismutase copper/zinc binding%3B NPH3.
Os09g0456100	18.2767	7.43667	-1.29727	7.06692e-24	1.67706e-21	Down	Remorin_C-containing protein Control of panicle length
Os02g0208500	82.6867	29.2133	-1.50103	2.65922e-23	6.06794e-21	Down	Conserved hypothetical protein.
Os08g0126700	22.4567	8.53333	-1.39596	3.01702e-23	6.83182e-21	Down	Nucleotide-binding alpha-beta plait domain containing protein.
Os04g0495400	49.1767	20.6733	-1.2502	4.07661e-23	9.0826e-21	Down	DOMON domain containing protein.
Os10g0150300	88.6967	26.5733	-1.7389	6.44006e-23	1.41239e-20	Down	Protein of unknown function DUF1210 family protein.
Os03g0195300	15.4333	6.42667	-1.26391	7.24026e-23	1.5677e-20	Down	Similar to Low affinity sulphate transporter 3.
Os03g0320800	18.6267	5.88667	-1.66185	1.36306e-22	2.92999e-20	Down	Similar to Leucine Rich Repeat family protein expressed.
Os06g0671800	19.9667	7.85333	-1.34622	1.55672e-22	3.29848e-20	Down	Similar to patellin-5.
Os04g0644400	600.15	252.477	-1.24917	4.73359e-22	9.35071e-20	Down	Similar to Proline-rich-like protein.
Os04g0121100	48.8967	20.79	-1.23385	4.73535e-22	9.35071e-20	Down	Similar to OSIGBa0115D20.4 protein.
Os03g0684700	48.99	19.0567	-1.36219	1.24281e-21	2.3482e-19	Down	HPP family protein.
Os10g0508000	28.49	12.0333	-1.24342	4.04265e-21	7.48084e-19	Down	Similar to C-terminal peptide-binding protein 1.
Os07g0689800	5.95333	2.18	-1.44937	7.38814e-21	1.32825e-18	Down	Tetratricopeptide-like helical domain containing protein.
Os12g0274750	2302.75	1037.57	-1.15014	2.11914e-20	3.63366e-18	Down	Hypothetical gene.
Os02g0236600	87.7067	40.0933	-1.12932	2.59515e-20	4.42428e-18	Down	Peroxidase P7 (EC 1.11.1.7) (TP7).
Os11g0523700	19.6067	7.71	-1.34654	7.63943e-20	1.19903e-17	Down	Similar to Transcription factor ICE1 (Inducer of CBF expression 1) (Basic helix- loop-helix protein 116) (bHLH116) (AtbHLH116).
Os05g0586400	11.6233	4.86333	-1.25701	9.22715e-20	1.43306e-17	Down	Protein of unknown function DUF3133 domain containing protein.
Os03g0857600	44.6733	22.13	-1.01341	1.24371e-19	1.89196e-17	Down	Protein of unknown function DUF303 acetylesterase putative domain containing protein.
Os03g0726500	255.503	112.287	-1.18616	3.29057e-19	4.87011e-17	Down	Protein of unknown function DUF81 domain containing protein.
MSTRG.31447	44.8633	12.29	-1.86805	5.23624e-19	7.50377e-17	Down	PREDICTED: early nodulin-like protein 3 [Oryza sativa Japonica Group]
Os03g0717000	47.9733	22.9033	-1.06668	6.06857e-19	8.6133e-17	Down	Similar to TMK protein precursor.
Os03g0609500	37.9533	15.5067	-1.29134	8.04217e-19	1.12001e-16	Down	LATERAL ORGAN BOUNDARIES DOMAIN (LBD) protein Transcriptional activator Regulation of heading date and yield
Os03g0760800	110.033	40.65	-1.43661	1.0717e-18	1.46501e-16	Down	A member of the GAST (gibberellin (GA)-Stimulated Transcript) family Control of seedling growth and &alpha%3B-amylase expression Cell proliferation in meristems and panicles development
Os05g0518300	61.0133	23.5167	-1.37544	1.76416e-18	2.3573e-16	Down	Lipase GDSL domain containing protein.
Os03g0264600	10.9967	4.82667	-1.18797	1.95483e-18	2.60036e-16	Down	Similar to Nucleic acid binding protein.
Os03g0780800	30.6467	13.3767	-1.19601	3.34161e-18	4.38609e-16	Down	Fatty acid 2-hydroxylase Resistance to rice blast fungus infection
Os09g0451400	36.8533	14.42	-1.35372	3.85124e-18	5.03274e-16	Down	ACC oxidase Ethylene biosynthesis
Os09g0248900	24.0433	11.7533	-1.03257	6.24579e-18	7.98599e-16	Down	Myb/SANT-like domain domain containing protein.
Os02g0705500	18.5467	7.69667	-1.26885	9.34027e-18	1.17402e-15	Down	Helix-loop-helix DNA-binding domain containing protein.
Os07g0124750	3.57333	0.95	-1.91127	1.73296e-17	2.09822e-15	Down	Similar to cDNA clone:J033097L05 full insert sequence.
Os09g0451266	34.8533	14.76	-1.2396	1.8143e-17	2.18777e-15	Down	Hypothetical gene.
Os01g0619900	18.16	8.08667	-1.16715	1.90384e-17	2.28646e-15	Down	Similar to DNA binding.
Os02g0818000	313.117	117.057	-1.41949	4.36176e-17	5.11412e-15	Down	Similar to Brown planthopper-induced resistance protein 1.
Os07g0147500	430.577	203.26	-1.08294	7.87279e-17	8.94783e-15	Down	Similar to Photosystem II 10 kDa polypeptide chloroplast precursor.
Os11g0291475	58.63	28.7567	-1.02774	1.19693e-16	1.32981e-14	Down	Hypothetical protein.
Os04g0412200	45.31	21.74	-1.05948	1.46983e-16	1.62691e-14	Down	Similar to Ferredoxin I.
Os06g0208100	23.0167	7.43	-1.63124	1.78297e-16	1.95889e-14	Down	Similar to Homeodomain protein HOX3.
Os01g0822900	642.927	308.303	-1.0603	1.88489e-16	2.05564e-14	Down	Similar to Lipid transfer protein.
Os05g0375400	172.29	47.3367	-1.86381	3.15454e-16	3.35399e-14	Down	Beta-glucanase precursor.
Os09g0457100	8.21333	3.39667	-1.27385	4.05457e-16	4.26506e-14	Down	Cytochrome P450 family protein.
Os06g0643500	63.3267	29.54	-1.10014	2.00741e-15	1.96528e-13	Down	Similar to ADR11 protein (Fragment).
Os11g0559600	1	0.0266667	-5.22882	3.86744e-15	3.68887e-13	Down	Conserved hypothetical protein.
Os08g0285600	3.25	1.34333	-1.27462	2.28554e-14	1.98822e-12	Down	Similar to phytosulfokine receptor.
Os01g0117300	17.14	7.3	-1.2314	2.96943e-14	2.56808e-12	Down	Similar to Receptor kinase LRK10.
Os04g0472300	22.6567	8.64	-1.39083	4.41331e-14	3.72982e-12	Down	PLC-like phosphodiesterase TIM beta/alpha-barrel domain domain containing protein.
MSTRG.16444	7.70333	3.09333	-1.31632	8.39201e-14	6.80165e-12	Down	--
Os05g0178300	139.607	47.6233	-1.55163	1.10659e-13	8.82414e-12	Down	Similar to Cadmium tolerant 1.
Os03g0320850	5.00333	1.34667	-1.8935	1.95555e-13	1.51857e-11	Down	Hypothetical gene.
Os06g0613500	31.5733	15.7133	-1.00672	3.2261e-13	2.44755e-11	Down	Similar to Transcription factor (Fragment).
Os04g0364800	20.3967	6.98333	-1.54635	5.65078e-13	4.13977e-11	Down	Barwin-related endoglucanase domain containing protein.
Os01g0785900	8.88	3.28	-1.43686	5.73607e-13	4.191e-11	Down	Zinc finger C2H2-type domain containing protein.
Os04g0665600	8.97	4.18333	-1.10046	9.74629e-13	6.80268e-11	Down	HTH_MYB-like transcription factor Positive regulation of leaf inclination
Os02g0617400	15.0967	6.45333	-1.22611	1.26577e-12	8.71177e-11	Down	Lipase GDSL domain containing protein.
Os02g0445100	22.5167	9.94	-1.17968	1.71896e-12	1.16153e-10	Down	Similar to Auxin-induced SAUR-like protein.
Os06g0729400	28.1133	12.9	-1.12388	1.80064e-12	1.21396e-10	Down	Similar to Gibberellin-regulated protein 2 precursor.
MSTRG.6990	4.06	1.65333	-1.2961	3.41613e-12	2.20776e-10	Down	--
Os01g0110800	27.5233	13.23	-1.05684	4.58052e-12	2.91581e-10	Down	Leucine-rich repeat plant specific containing protein.
Os08g0535200	9.57667	3.34	-1.51968	7.34082e-12	4.57728e-10	Down	Similar to MtN3-like protein.
Os03g0418700	8.42667	4.18	-1.01146	1.13393e-11	6.76798e-10	Down	Conserved hypothetical protein.
Os07g0469100	262.417	111.927	-1.22931	1.2037e-11	7.1413e-10	Down	Similar to Thylakoid membrane phosphoprotein 14 kDa chloroplast precursor.
Os02g0826300	7.07	2.27	-1.63902	3.14546e-11	1.73988e-09	Down	Conserved hypothetical protein.
Os02g0321600	12.6033	4.21333	-1.58077	3.14967e-11	1.73988e-09	Down	Conserved hypothetical protein.
Os01g0223900	4.66333	2.10333	-1.14868	3.27864e-11	1.80107e-09	Down	Serine/threonine protein kinase-related domain containing protein.
Os03g0199500	3.40333	0.713333	-2.2543	3.72036e-11	2.03243e-09	Down	Conserved hypothetical protein.
Os01g0814100	62.07	25.5133	-1.28264	3.75779e-11	2.0491e-09	Down	Similar to Bindin (Fragment).
Os05g0189900	43.6067	20.9233	-1.05944	5.11477e-11	2.72886e-09	Down	Vegetative storage protein/acid phosphatase domain containing protein.
Os03g0162200	44.1	21.66	-1.02575	5.59854e-11	2.95507e-09	Down	Similar to Histone H2A.
Os11g0285000	4.03	1.18667	-1.76387	8.114e-11	4.17147e-09	Down	Similar to Beta-amyrin synthase.
Os01g0938200	20.9433	10.34	-1.01825	1.00792e-10	5.12847e-09	Down	Similar to RNA-binding protein BRUNOL5 (Fragment).
Os06g0260250	32.7467	15.8067	-1.05081	1.48704e-10	7.37652e-09	Down	Hypothetical protein.
Os03g0797800	25.6767	9.00667	-1.51139	1.49048e-10	7.38124e-09	Down	AUX/IAA protein family protein.
Os09g0567800	44.11	21.5	-1.03677	1.56496e-10	7.71146e-09	Down	Hypothetical conserved gene.
Os01g0723500	10.31	4.76333	-1.114	1.61511e-10	7.93221e-09	Down	Transcriptional factor B3 family protein.
Os04g0507700	27.4033	12.2167	-1.1655	1.62262e-10	7.95596e-09	Down	Lipase GDSL domain containing protein.
Os02g0526700	8.33667	3.91333	-1.09107	2.34487e-10	1.12736e-08	Down	Conserved hypothetical protein.
Os07g0147600	4.78333	1.87333	-1.35241	2.54503e-10	1.21571e-08	Down	Protein kinase core domain containing protein.
Os03g0245300	10.2267	3.34333	-1.61298	2.76994e-10	1.31468e-08	Down	Similar to Hydroxyproline-rich glycoprotein DZ-HRGP precursor.
Os12g0554800	20.81	10.1	-1.04292	3.05152e-10	1.43683e-08	Down	Similar to Polygalacturonase-like protein.
Os04g0465300	113.027	43.8333	-1.36656	3.99001e-10	1.84361e-08	Down	A member of the GAST (gibberellin (GA)-Stimulated Transcript) family Cell division Differentiation of panicles
Os01g0922100	18.2167	8.89333	-1.03446	4.04908e-10	1.86509e-08	Down	Conserved hypothetical protein.
Os05g0436900	8.01	3.53	-1.18213	4.8737e-10	2.19383e-08	Down	Zinc finger DHHC-type domain containing protein.
Os04g0498700	18.07	8.12667	-1.15286	4.93737e-10	2.20908e-08	Down	Haem peroxidase family protein.
Os01g0117266	25.7667	11.5167	-1.16178	5.2423e-10	2.32101e-08	Down	Conserved hypothetical protein.
Os06g0140400	15.2067	7.12	-1.09475	6.2094e-10	2.71275e-08	Down	Similar to HAHB-6 (Fragment).
Os06g0509900	3.93333	0.266667	-3.88264	6.23001e-10	2.71775e-08	Down	Similar to Thionin.
Os08g0551225	3.27333	1.63	-1.00589	6.41617e-10	2.79485e-08	Down	Hypothetical gene.
Os05g0554400	6.09333	2.68667	-1.18141	7.08038e-10	3.06169e-08	Down	Phosphatidyl serine synthase family protein.
Os04g0556600	17.2667	7.74667	-1.15634	7.26244e-10	3.13585e-08	Down	cis-Zeatin-O-glucosyltransferase Catalyze O-glucosylation of cZ and cZ-riboside
Os06g0539700	1.80333	0.153333	-3.55592	1.52977e-09	6.21631e-08	Down	Conserved hypothetical protein.
Os10g0130800	6.59333	3.25667	-1.01761	1.78185e-09	7.13317e-08	Down	Conserved hypothetical protein.
MSTRG.16443	1.98	0.786667	-1.33168	1.80679e-09	7.21352e-08	Down	--
Os02g0168400	12.4767	4.86	-1.3602	1.94971e-09	7.691e-08	Down	Hypothetical conserved gene.
Os03g0434800	5.77667	1.81	-1.67425	2.4234e-09	9.34822e-08	Down	Similar to Peroxidase 2.
Os01g0318202	2.47667	0.89	-1.47652	3.18147e-09	1.19918e-07	Down	Hypothetical gene.
Os03g0226300	4.63667	1.91	-1.27952	3.49043e-09	1.30314e-07	Down	Similar to Pto kinase interactor 1.
Os08g0550600	3.93667	1.95333	-1.01104	3.72449e-09	1.37932e-07	Down	Hypothetical conserved gene.
Os05g0551100	4.95333	1.90333	-1.37987	5.68343e-09	2.03589e-07	Down	Conserved hypothetical protein.
Os01g0957100	32.8667	16.2967	-1.01205	6.30835e-09	2.23374e-07	Down	Protein kinase core domain containing protein.
Os02g0797400	11.3567	5.16667	-1.13623	6.86129e-09	2.40583e-07	Down	MCM family protein.
Os07g0658600	60.4633	29.67	-1.02706	9.7789e-09	3.31143e-07	Down	Similar to Nucleoid DNA-binding-like protein.
Os07g0132300	23.7533	10.4533	-1.18417	1.04841e-08	3.52209e-07	Down	Conserved hypothetical protein.
Os03g0198600	5.51667	2.13667	-1.36843	1.58089e-08	5.13079e-07	Down	Homeodomain-leucine zipper transcription factor Regulation of panicle exsertion
MSTRG.29715	5.07333	2.32	-1.12881	1.89427e-08	6.07476e-07	Down	--
Os02g0662100	340.843	166.777	-1.03119	1.9291e-08	6.15982e-07	Down	Similar to Tfm5 protein.
Os03g0311600	11.9933	5.58667	-1.10217	2.11597e-08	6.72758e-07	Down	Helix-loop-helix DNA-binding domain containing protein.
MSTRG.17572	13.7467	5.73667	-1.2608	2.15131e-08	6.83258e-07	Down	--
Os03g0113500	37.1133	17.8333	-1.05736	2.22587e-08	7.03177e-07	Down	Conserved hypothetical protein.
Os01g0544450	9.37333	4.50333	-1.05757	2.52137e-08	7.81546e-07	Down	Similar to DNA replication licensing factor mcm4.
Os03g0119100	1.07333	0.346667	-1.63048	2.86116e-08	8.78608e-07	Down	Similar to Phospholipase D beta 2.
Os10g0563900	18.3433	8.61667	-1.09005	3.93137e-08	1.18516e-06	Down	Cyclin-related 2 domain containing protein.
Os01g0799500	100.327	46.83	-1.0992	4.11209e-08	1.23155e-06	Down	Methyladenine glycosylase domain containing protein.
MSTRG.14703	2.21333	0.52	-2.08964	4.39568e-08	1.30394e-06	Down	--
Os06g0226500	4.16333	1.23667	-1.75128	5.01361e-08	1.4696e-06	Down	Helix-loop-helix protein Brassinosteroid signaling
Os08g0550700	6.48333	1.77667	-1.86756	5.83416e-08	1.68515e-06	Down	Similar to Auxin induced protein.
Os07g0603300	20.56	10.0933	-1.02644	6.10249e-08	1.75411e-06	Down	TON1 RECRUIT MOTIF (TRM)-containing protein Regulation of grain size and shape
Os06g0473000	4.25333	0.83	-2.35741	6.61419e-08	1.87934e-06	Down	Hypothetical conserved gene.
Os08g0503000	108.877	46.0667	-1.2409	9.48141e-08	2.59462e-06	Down	Hypothetical protein.
Os12g0541700	34.3333	16.3233	-1.07267	9.96632e-08	2.70486e-06	Down	Similar to Rapid alkalinization factor 2.
Os08g0101100	27.8733	13.4267	-1.05378	1.04282e-07	2.81733e-06	Down	High mobility group HMG1/HMG2 domain containing protein.
Os12g0550800	1.11333	0.03	-5.21378	1.0539e-07	2.84467e-06	Down	Hypothetical conserved gene.
Os09g0360500	18.46	8.54	-1.11209	1.11158e-07	2.98676e-06	Down	Thiolase-like subgroup domain containing protein.
Os06g0220100	12.4867	5.22667	-1.25643	1.13086e-07	3.03035e-06	Down	Hypothetical protein.
MSTRG.8125	3.33	1.61667	-1.0425	1.13425e-07	3.03345e-06	Down	--
Os10g0531700	7.22333	2.97333	-1.28058	1.17355e-07	3.12217e-06	Down	Serine/threonine protein kinase-related domain containing protein.
Os11g0427800	18.2033	7.58	-1.26393	1.2305e-07	3.25615e-06	Down	Similar to Lipid transfer protein LPT III.
Os07g0619400	22.4667	11.23	-1.00043	1.55412e-07	4.04398e-06	Down	EF-Hand type domain containing protein.
Os05g0160800	3.4	1.39	-1.29045	1.73372e-07	4.44718e-06	Down	Similar to DNA polymerase epsilon subunit 2.
Os10g0555300	2.92	1.02667	-1.508	1.74007e-07	4.45362e-06	Down	Zinc finger C2H2-like domain containing protein.
Os04g0631200	54.5267	24.1767	-1.17335	1.76846e-07	4.50683e-06	Down	Similar to cDNA clone:J033024P08 full insert sequence.
Os01g0740350	5.89333	1.74	-1.76	1.77565e-07	4.52129e-06	Down	Hypothetical gene.
Os06g0640599	19.4433	6.63333	-1.55147	2.19242e-07	5.4929e-06	Down	Hypothetical protein.
Os03g0392600	6	2.51333	-1.25536	2.5014e-07	6.19896e-06	Down	Peptidase S10 serine carboxypeptidase family protein.
Os06g0560000	9.96667	4.39333	-1.1818	2.97999e-07	7.26363e-06	Down	Ferroportin1 family protein.
Os03g0202001	20.73	10.2867	-1.01094	2.99305e-07	7.28949e-06	Down	Similar to Adenylyl-sulfate kinase.
Os05g0449200	6.27333	2.91	-1.10821	3.26399e-07	7.84872e-06	Down	Transferase family protein.
Os12g0530100	29.31	12.2367	-1.26018	3.54147e-07	8.40434e-06	Down	Similar to Peroxidase 24 precursor (EC 1.11.1.7) (Atperox P24) (ATP47).
Os11g0505300	3.58667	1.21	-1.56764	4.22449e-07	9.77499e-06	Down	Sulfotransferase Resistance to rice stripe virus
Os03g0371800	8.52333	2.76333	-1.62501	4.54399e-07	1.04491e-05	Down	Similar to Myb-like DNA-binding domain containing protein.
Os01g0827700	8.13333	3.90333	-1.05914	4.66789e-07	1.06925e-05	Down	Lipase GDSL domain containing protein.
Os10g0438500	3.83	1.81667	-1.07605	4.72809e-07	1.07888e-05	Down	Cyclin-like F-box domain containing protein.
Os08g0450100	2.44667	0.896667	-1.44817	5.08277e-07	1.15096e-05	Down	Similar to Pectinesterase (EC 3.1.1.11) (Fragment).
Os03g0574600	21.9933	9.35	-1.23403	5.3637e-07	1.20812e-05	Down	Conserved hypothetical protein.
Os01g0756200	14.7733	5.71	-1.37143	5.43035e-07	1.21692e-05	Down	Similar to VirE2-interacting protein VIP1.
Os05g0339300	4.38667	1.19	-1.88216	5.51568e-07	1.23376e-05	Down	Conserved hypothetical protein.
Os10g0481500	1.02	0.146667	-2.79796	5.99232e-07	1.32654e-05	Down	Similar to Flotillin-like protein 1.
Os09g0414900	5.91333	0.893333	-2.7267	6.00776e-07	1.32897e-05	Down	Similar to GASA5-like protein (Fragment).
Os01g0914300	49.4233	21.1067	-1.22749	6.93804e-07	1.51331e-05	Down	Plant lipid transfer protein/seed storage/trypsin-alpha amylase inhibitor domain containing protein.
Os03g0214100	20.0567	9.73333	-1.04308	7.36372e-07	1.59211e-05	Down	Replication protein A1.
Os01g0213800	29.28	14.0767	-1.05661	8.12627e-07	1.73548e-05	Down	Plant-specific transcription factor miR319 target gene
MSTRG.31668	1.13333	0.001	-10.1464	9.67641e-07	2.01857e-05	Down	--
Os02g0528000	13.6367	6.5	-1.06898	1.02412e-06	2.11372e-05	Down	Zinc finger RING-type domain containing protein.
Os08g0376300	4.72	2.23	-1.08174	1.17057e-06	2.37835e-05	Down	Similar to Leucine-rich receptor-like protein kinase.
Os05g0442000	2.40333	0.473333	-2.34411	1.24095e-06	2.5059e-05	Down	Hypothetical conserved gene.
Os03g0132250	6.55667	3.20333	-1.03339	1.44243e-06	2.86401e-05	Down	Hypothetical protein.
Os04g0463000	4.63667	2.3	-1.01145	1.7495e-06	3.39864e-05	Down	Serine/threonine protein kinase domain containing protein.
Os06g0184866	4.11667	1.85667	-1.14876	1.78641e-06	3.46126e-05	Down	Pentatricopeptide repeat domain containing protein.
Os02g0586900	3.86667	0.646667	-2.58	2.04475e-06	3.91073e-05	Down	Hypothetical conserved gene.
Os01g0555100	9.00667	3.87	-1.21866	2.08824e-06	3.98107e-05	Down	Similar to TATA-binding protein associated factor 2N (RNA-binding protein 56) (TAFII68) (TAF(II)68).
Os05g0579600	26.48	11.4067	-1.21503	2.58489e-06	4.78938e-05	Down	Homeodomain-like containing protein.
Os03g0159600	7.46	3.43667	-1.11817	2.6185e-06	4.84259e-05	Down	Similar to Rab28 protein.
MSTRG.31680	1.56	0.0433333	-5.16993	2.90908e-06	5.29741e-05	Down	--
Os04g0201500	2.31667	0.66	-1.81151	3.07115e-06	5.53815e-05	Down	Similar to amino acid permease.
Os08g0444500	11.9067	4.00333	-1.5725	3.17004e-06	5.69226e-05	Down	Conserved hypothetical protein.
Os11g0156300	7.58333	3.72	-1.02753	3.6027e-06	6.34624e-05	Down	Protein of unknown function DUF623 plant domain containing protein.
Os12g0210500	4.43667	1.44667	-1.61674	3.82646e-06	6.6729e-05	Down	Conserved hypothetical protein.
Os06g0725000	11.61	5.45667	-1.08928	4.01749e-06	6.94088e-05	Down	Similar to Senescence-associated protein DIN1.
Os06g0140700	21.61	10.0867	-1.09925	4.18818e-06	7.18556e-05	Down	Similar to Homeodomain leucine zipper protein (Fragment).
Os09g0501650	3.59333	1.68667	-1.09115	4.31525e-06	7.38117e-05	Down	Hypothetical protein.
Os02g0278700	3.53	1.70667	-1.04849	5.30233e-06	8.83643e-05	Down	Similar to Kaurene synthase A (Fragment).
Os03g0258900	5.71	1.70333	-1.74513	5.4904e-06	9.114e-05	Down	Galactose oxidase beta-propeller domain containing protein.
Os10g0575900	9.25333	4.57	-1.01778	5.52016e-06	9.15317e-05	Down	Conserved hypothetical protein.
Os03g0336200	8.96333	4.29667	-1.06082	5.66302e-06	9.34093e-05	Down	bZIP DNA-binding protein Disease resistance Vascular development
Os11g0128400	3.06	1.35	-1.18057	6.14779e-06	0.000100092	Down	CDC45-like protein family protein.
Os02g0755400	3.90333	1.93667	-1.01113	6.49367e-06	0.000105146	Down	Similar to RNA recognition motif-containing protein SEB-4.
Os11g0118400	3.78	1.51667	-1.31748	6.51641e-06	0.000105457	Down	Hypothetical protein.
Os12g0609600	16.0767	7.57	-1.0866	6.81064e-06	0.000109206	Down	Auxin responsive SAUR protein domain containing protein.
Os06g0229900	0.343333	0.001	-8.42347	6.96054e-06	0.000111309	Down	Similar to Starch synthase IIa (EC 2.4.1.21) (Fragment).
Os01g0176400	7.80333	3.26	-1.25922	7.14515e-06	0.000113831	Down	Similar to Photoreceptor-interacting protein-like.
Os01g0872900	2.68	1.08667	-1.30232	7.2948e-06	0.000115842	Down	Protein of unknown function DUF635 family protein.
Os03g0346200	5.48667	0.88	-2.64035	8.4929e-06	0.000132527	Down	Conserved hypothetical protein.
Os04g0444300	7.08667	3.08	-1.20218	8.71901e-06	0.000135769	Down	Similar to ARGOS.
Os02g0101400	8.18	3.68333	-1.15109	8.81074e-06	0.000137054	Down	Lipase GDSL domain containing protein.
Os01g0214001	0.3	0.001	-8.22882	8.96092e-06	0.000138953	Down	Hypothetical protein.
Os02g0758000	22.3367	9.59667	-1.21881	9.08285e-06	0.000140602	Down	Similar to Low molecular weight heat shock protein precursor (Mitochondrial small heat shock protein 22).
Os12g0191500	6.44	2.37333	-1.44015	9.10456e-06	0.000140812	Down	Similar to Peroxidase 43 precursor (EC 1.11.1.7) (Atperox P43).
Os06g0184900	1.57667	0.136667	-3.52814	9.20936e-06	0.000142359	Down	Transferase family protein.
Os12g0158400	5.92	2.20667	-1.42373	9.49081e-06	0.000146252	Down	Protein of unknown function DUF623 plant domain containing protein.
Os02g0776900	9.54	4.30667	-1.14742	9.94622e-06	0.000152557	Down	Transcription activator Gibberellin (GA)-induced stem elongation
Os06g0559900	3.70333	1.73667	-1.0925	1.00335e-05	0.000153577	Down	Hypothetical protein.
Os01g0177400	1.85333	0.56	-1.72662	1.17173e-05	0.000175849	Down	GA 3 beta-hydroxylase2 GA metabolism
Os04g0362375	2.49667	0.656667	-1.92677	1.50407e-05	0.000217855	Down	Hypothetical gene.
Os03g0143100	1.71667	0.723333	-1.24688	1.5717e-05	0.000226435	Down	Similar to SDD1 (STOMATAL DENSITY AND DISTRIBUTION)%3B subtilase.
Os04g0128900	2.60333	1.11	-1.2298	1.59744e-05	0.000229474	Down	Flavin monooxygenase-like enzyme Auxin biosynthesis
Os01g0756300	5.90333	2.57	-1.19976	1.63454e-05	0.000234123	Down	Conserved hypothetical protein.
Os02g0308400	81.1867	36.1267	-1.16818	2.12235e-05	0.000292145	Down	FAS1 domain domain containing protein.
Os04g0662400	1.23667	0.253333	-2.28735	2.26439e-05	0.000308658	Down	Auxin responsive SAUR protein family protein.
Os08g0290700	5.18667	2.28333	-1.18367	2.40247e-05	0.000325263	Down	Winged helix repressor DNA-binding domain containing protein.
Os04g0588200	1.73667	0.826667	-1.07094	2.41132e-05	0.000325875	Down	Similar to emb2411 (embryo defective 2411)%3B ATP binding / ATP-dependent DNA helicase/ DNA binding.
Os08g0199400	2.65667	0.923333	-1.52469	2.61892e-05	0.000350102	Down	Similar to Stearoyl-acyl carrier protein desaturse (EC 1.14.99.6) (Fragment).
Os02g0658200	10.69	4.33667	-1.3016	2.66664e-05	0.000355201	Down	Zinc finger PHD-type domain containing protein.
Os08g0467100	1.64333	0.77	-1.09369	2.91838e-05	0.000384247	Down	Zinc finger C2H2 domain containing protein.
Os07g0655800	1.18667	0.223333	-2.40964	2.95621e-05	0.000388882	Down	Similar to Aspartic acid-rich protein.
Os10g0195000	3.33667	1.65333	-1.01303	3.08173e-05	0.000403248	Down	Multi antimicrobial extrusion protein MatE family protein.
Os07g0562400	3.03333	1.42333	-1.09163	3.12025e-05	0.000407263	Down	Major facilitator superfamily protein.
MSTRG.29992	1.82	0.39	-2.22239	3.20753e-05	0.000415675	Down	PREDICTED: LOW QUALITY PROTEIN: peroxisomal (S)-2-hydroxy-acid oxidase GLO4-like [Oryza brachyantha]
Os05g0358200	2.34667	1.09667	-1.09749	4.04547e-05	0.000508926	Down	Similar to DNA primase.
Os04g0379800	3.52667	1.69667	-1.0556	4.10418e-05	0.000515438	Down	Conserved hypothetical protein.
Os08g0352100	2.91333	0.526667	-2.46771	4.33664e-05	0.00053938	Down	Conserved hypothetical protein.
Os11g0644100	4.54667	1.45667	-1.64214	4.58927e-05	0.000566762	Down	Leucine-rich repeat N-terminal domain containing protein.
Os01g0760900	6.83	3.29667	-1.05088	4.69881e-05	0.000577783	Down	Conserved hypothetical protein.
Os04g0415600	7.07667	3.23667	-1.12856	4.91202e-05	0.000601363	Down	Similar to H0622F05.9 protein.
Os01g0786000	4.09	1.75	-1.22475	5.06563e-05	0.000617113	Down	ABC transporter conserved site domain containing protein.
Os12g0538600	3.47333	0.533333	-2.70321	5.72227e-05	0.000683147	Down	Thioredoxin fold domain containing protein.
Os04g0376400	3.63667	1.73	-1.07184	5.7291e-05	0.000683345	Down	Glycoside hydrolase family 18 catalytic domain domain containing protein.
Os03g0833100	10.2133	4.65667	-1.13308	5.901e-05	0.000701737	Down	Similar to Tasselseed2 protein (Fragment).
Os09g0568500	2.5	0.263333	-3.24697	5.92485e-05	0.0007033	Down	Germin family protein.
Os10g0403800	4.33667	1.72333	-1.33138	6.08648e-05	0.000719893	Down	Similar to DNA binding protein.
Os08g0371200	7.34333	1.78333	-2.04186	6.12732e-05	0.00072357	Down	Carotenoid oxygenase domain containing protein.
Os05g0448300	13.6433	6.54667	-1.05936	6.32797e-05	0.000742535	Down	Similar to glycerol-3-phosphate acyltransferase 8.
Os02g0679700	6.25333	2.76	-1.17996	6.46338e-05	0.000756032	Down	Protein of unknown function DUF623 plant domain containing protein.
Os03g0160300	3.71333	0.556667	-2.73783	7.56203e-05	0.00087047	Down	Protein of unknown function DUF1677 plant family protein.
Os01g0863500	6.02667	1.44333	-2.06196	7.75141e-05	0.000888821	Down	Control of leaf rolling and bending
Os03g0767650	2.71333	1.16	-1.22594	8.75848e-05	0.000988432	Down	Hypothetical gene.
Os08g0485500	7.47	3.49667	-1.09513	8.9358e-05	0.00100368	Down	Epidermal patterning factor-like 1 (EPFL1) protein Small secretary signal peptide Regulation of awn elongation (Dysfunctional RAE2 protein) Regulation of grain number grain length and awn development
Os02g0678800	8.75333	4.07	-1.1048	9.005e-05	0.00100916	Down	Transcriptional activator/repressor Reguration of KNOX gene Oskn2 (regulator of meristem function) Floral organogenesis
Os08g0130100	5.00333	2.34667	-1.09228	9.03402e-05	0.00101165	Down	Zinc finger LSD1-type domain containing protein.
Os04g0496300	56.9233	27.94	-1.02669	9.82655e-05	0.00108564	Down	Similar to H0306B06.4 protein.
Os03g0314500	6.31667	2.87333	-1.13644	9.85888e-05	0.0010884	Down	WD40-like Beta Propeller domain containing protein.
MSTRG.5532	3.05333	1.50667	-1.01902	0.000106679	0.00116568	Down	ATP synthase subunit a, chloroplastic [Triticum urartu]
Os02g0803900	0.906667	0.273333	-1.72991	0.000120864	0.00130307	Down	UDP-glucuronosyl/UDP-glucosyltransferase domain containing protein.
Os12g0552600	0.653333	0.0866667	-2.91427	0.000132249	0.0014048	Down	Similar to MATE efflux family protein.
Os01g0873000	7.67667	3.04	-1.33641	0.000133998	0.00141911	Down	Hypothetical conserved gene.
MSTRG.25137	4.14333	1.86	-1.15549	0.000135387	0.00143075	Down	--
Os12g0163750	9.66	3.8	-1.34602	0.000136378	0.00144019	Down	Hypothetical protein.
Os03g0782200	96.4	25.5867	-1.91364	0.000140364	0.00147547	Down	Hypothetical protein.
Os07g0107000	2.48333	0.74	-1.74668	0.00014395	0.00150835	Down	Hypothetical protein.
Os11g0703600	3.39333	1.50667	-1.17134	0.000150555	0.00156485	Down	Conserved hypothetical protein.
Os12g0199000	1.11667	0.326667	-1.77331	0.000157738	0.00162414	Down	Similar to Jasmonate-induced protein.
MSTRG.31666	1.12667	0.0866667	-3.70044	0.000160069	0.00164414	Down	alcohol oxidase-like [Oryza sativa Japonica Group]
Os12g0532600	10.3633	4.80333	-1.10938	0.000170276	0.00173398	Down	Conserved hypothetical protein.
MSTRG.2423	2.3	0.376667	-2.61027	0.000177054	0.00179172	Down	alpha/beta-Hydrolases superfamily protein [Zea mays]
Os12g0568900	6.37667	2.99	-1.09266	0.000181166	0.00182669	Down	Thaumatin pathogenesis-related family protein.
Os10g0356000	16.6967	6.6	-1.33902	0.000182638	0.00183778	Down	Similar to ribulose-1 5-bisphosphate carboxylase/oxygenase large subunit.
Os01g0109500	2.67667	1.17333	-1.18982	0.00018471	0.00185485	Down	Conserved hypothetical protein.
MSTRG.31385	2.24333	1.01333	-1.14654	0.000198308	0.00197403	Down	photosystem II 47 kDa protein (chloroplast) [Oryza nivara]
Os02g0730000	20.9467	9.8	-1.09587	0.000200351	0.00198902	Down	Similar to Mitochondrial aldehyde dehydrogenase.
Os12g0599800	1.96667	0.556667	-1.82087	0.000202387	0.00200655	Down	Pectinesterase inhibitor domain containing protein.
Os08g0200100	12.0333	5.79333	-1.05457	0.000203823	0.00202012	Down	Ribonucleotide reductase-related domain containing protein.
MSTRG.20145	5.00333	1.52	-1.71882	0.000239291	0.00231442	Down	--
Os01g0563700	0.36	0.136667	-1.39734	0.000241444	0.00233296	Down	Hypothetical gene.
Os08g0479400	1.77	0.79	-1.16382	0.000245658	0.00236674	Down	Similar to Hydroxyproline-rich glycoprotein DZ-HRGP precursor.
Os10g0420200	3.44667	1.64	-1.07151	0.000251732	0.00241663	Down	IQ calmodulin-binding region domain containing protein.
Os04g0457300	1.77	0.696667	-1.34521	0.000252508	0.00242173	Down	Similar to H0523F07.12 protein.
Os01g0791033	33.2867	12.9867	-1.35791	0.000262475	0.00250034	Down	Similar to ribulose-1 5-bisphosphate carboxylase/oxygenase large subunit.
Os04g0528600	3.90667	1.81333	-1.10729	0.0002626	0.00250072	Down	Similar to OSIGBa0115K01-H0319F09.22 protein.
Os05g0399700	0.636667	0.03	-4.4075	0.00026957	0.00255807	Down	Chitinase (EC 3.2.1.14).
Os03g0782300	0.443333	0.02	-4.47032	0.000273579	0.00258618	Down	Conserved hypothetical protein.
Os03g0100010	1.92333	0.883333	-1.12258	0.00027593	0.00260426	Down	Conserved hypothetical protein.
Os06g0122001	4.73	2.26667	-1.06127	0.000293184	0.00273921	Down	Hypothetical protein.
Os02g0813600	7.99	3.35	-1.25403	0.000302329	0.00281138	Down	Thiolase-like subgroup domain containing protein.
Os04g0453450	1.33667	0.253333	-2.39953	0.000304366	0.0028236	Down	Hypothetical gene.
Os09g0427125	2.84667	1.23	-1.21062	0.000313693	0.00289797	Down	Hypothetical conserved gene.
Os04g0142850	1.15333	0.37	-1.64021	0.000325615	0.00299484	Down	Hypothetical protein.
Os12g0502300	4.99	2.41	-1.05001	0.000354532	0.00320733	Down	Similar to Cyclin A-like protein (Fragment).
Os08g0524400	51.8267	24.87	-1.05929	0.00035665	0.00321962	Down	Protein of unknown function DUF568 DOMON-like domain containing protein.
Os02g0247100	1.8	0.536667	-1.7459	0.000374916	0.00335064	Down	Similar to bZIP transcription factor family protein.
Os01g0917900	6.65333	3.06333	-1.11897	0.000377545	0.00336928	Down	Zinc finger RING/FYVE/PHD-type domain containing protein.
Os08g0460000	578.007	211.883	-1.44782	0.000382036	0.00340424	Down	Similar to Germin-like protein 1 precursor.
Os06g0652200	5.4	1.64	-1.71926	0.000402208	0.00355728	Down	Similar to Hemolysin-III related family protein.
Os05g0585800	0.886667	0.286667	-1.62902	0.000408039	0.00359403	Down	Protein of unknown function DUF1221 domain containing protein.
Os09g0421200	2.20667	1.01	-1.12751	0.00042165	0.00368853	Down	Conserved hypothetical protein.
Os11g0220300	1.73333	0.653333	-1.40766	0.000432998	0.00376781	Down	Similar to NB-ARC domain containing protein expressed.
Os06g0119300	0.896667	0.423333	-1.08278	0.000446869	0.0038647	Down	Protein of unknown function DUF594 family protein.
Os02g0527700	2.31	0.253333	-3.18878	0.000455503	0.00392108	Down	Hypothetical protein.
Os02g0773600	2.19	0.896667	-1.28829	0.000508036	0.00430951	Down	Hypothetical conserved gene.
Os09g0521100	5.71	2.74667	-1.05581	0.000515744	0.00436713	Down	Similar to 3-ketoacyl-CoA synthase.
Os10g0190100	2.38	1.00333	-1.24616	0.000536756	0.00452468	Down	Similar to Sulfotransferase domain containing protein expressed.
Os02g0795100	1.65667	0.583333	-1.50589	0.000560435	0.00468567	Down	Eukaryotic transcription factor DNA-binding domain containing protein.
Os07g0537550	3.78333	1.87667	-1.01149	0.000629743	0.00515187	Down	Hypothetical gene.
Os04g0553300	5.01667	2.30667	-1.12092	0.000640825	0.00523099	Down	Similar to OSIGBa0143N19.8 protein.
Os06g0659100	2.74	0.95	-1.52818	0.000652168	0.00530226	Down	Similar to Squamosa-promoter binding protein 1.
Os04g0461000	1.79	0.88	-1.02438	0.000661178	0.00536613	Down	Similar to Myb-related transcription factor LBM1.
Os02g0123700	1.75667	0.65	-1.43433	0.000679913	0.00549113	Down	Similar to CEL5%3DCELLULASE 5 (Fragment).
MSTRG.25488	3.61	1.51	-1.25745	0.000683688	0.00551112	Down	--
Os12g0235700	3.46	1.70333	-1.02241	0.000714331	0.00571619	Down	Serine/threonine protein kinase-related domain containing protein.
Os10g0557600	5.81333	1.77667	-1.71019	0.000724847	0.00578941	Down	Similar to GATA transcription factor 9.
Os03g0297850	1.72333	0.75	-1.20024	0.000745547	0.00593238	Down	Hypothetical protein.
Os06g0695451	2.97333	1.25	-1.25015	0.000776418	0.00614505	Down	Hypothetical protein.
Os05g0376600	1.32667	0.46	-1.5281	0.000787093	0.00620777	Down	BRCT domain containing protein.
Os07g0443500	0.54	0.0266667	-4.33985	0.000840002	0.00654183	Down	Molecular chaperone heat shock protein Hsp40 DnaJ domain containing protein.
Os05g0342100	0.846667	0.13	-2.70328	0.000928475	0.00712608	Down	Wound-induced protein Wun1 domain containing protein.
Os03g0674700	4.17667	2.00333	-1.05995	0.000968472	0.00738339	Down	Similar to Growth-regulating factor 3.
Os11g0214900	3.00333	1.24333	-1.27235	0.000971782	0.00740291	Down	Plant disease resistance response protein family protein.
Os03g0164300	10.3433	4.86	-1.08967	0.000992728	0.00753539	Down	Conserved hypothetical protein.
Os01g0306100	2.53333	0.92	-1.46133	0.000996445	0.00756167	Down	Plant specific eukaryotic initiation factor 4B family protein.
Os02g0122700	1.83333	0.66	-1.47393	0.00102636	0.00776485	Down	Similar to SET domain protein.
Os12g0242900	3.1	1.54333	-1.00622	0.0011282	0.00840243	Down	DNA polymerase alpha subunit B domain containing protein.
Os01g0663051	2.75	0.43	-2.67702	0.0011509	0.00854792	Down	Similar to SANT/MYB protein.
Os09g0568700	7.47	3.29	-1.18302	0.00118729	0.00875893	Down	RmlC-like jelly roll fold domain containing protein.
MSTRG.31663	1.41667	0.38	-1.89843	0.00120854	0.00888887	Down	--
Os10g0409400	1.73333	0.416667	-2.05658	0.00121412	0.00891698	Down	beta subunit of polygalacturonase 1 Abiotic stress response
Os07g0205900	0.63	0.23	-1.45372	0.00121478	0.00891959	Down	Armadillo-type fold domain containing protein.
Os09g0482681	1.41667	0.613333	-1.20776	0.00130504	0.00947445	Down	Hypothetical protein.
Os02g0177300	1.68333	0.78	-1.10977	0.00131961	0.00955689	Down	Squamosa-promoter binding protein 1.
Os06g0121200	2.66667	1.26667	-1.074	0.00140446	0.0100681	Down	Protein of unknown function DUF594 family protein.
MSTRG.18502	14.5933	4.55	-1.68137	0.00141882	0.0101497	Down	cell wall-associated hydrolase [Phaseolus vulgaris]
Os03g0149700	1.75	0.633333	-1.46632	0.00142732	0.0102024	Down	Zinc finger RING/FYVE/PHD-type domain containing protein.
Os07g0159700	3.64333	1.21333	-1.58628	0.00147999	0.0105055	Down	Protein kinase catalytic domain domain containing protein.
Os09g0241550	1.45	0.473333	-1.61512	0.00157894	0.0111016	Down	Similar to F-box domain containing protein expressed.
Os12g0495525	2.61667	1.01333	-1.36862	0.00164698	0.0115118	Down	Conserved hypothetical protein.
Os06g0194200	1.78	0.46	-1.95217	0.00173834	0.0120313	Down	Conserved hypothetical protein.
Os01g0741250	8.33	3.83	-1.12097	0.00179409	0.0123652	Down	Hypothetical protein.
Os10g0554001	4.08	1.86	-1.13327	0.00183185	0.0125816	Down	Conserved hypothetical protein.
Os03g0758700	1.14333	0.48	-1.25214	0.00184191	0.0126407	Down	WD40 repeat domain containing protein.
Os06g0109801	0.856667	0.256667	-1.73884	0.00191743	0.0130396	Down	Similar to cDNA clone:002-149-F01 full insert sequence.
Os06g0179100	4.98333	2.37667	-1.06817	0.00193647	0.013157	Down	Similar to H0306F03.13 protein.
MSTRG.31683	0.663333	0.0366667	-4.17719	0.00194601	0.0132037	Down	--
Os10g0554800	7.55	3.29667	-1.19547	0.00195313	0.0132399	Down	Plant lipid transfer protein and hydrophobic protein helical domain containing protein.
Os02g0640100	2.37	0.583333	-2.02249	0.00199711	0.0134856	Down	Hypothetical conserved gene.
MSTRG.5526	7.45333	3.17667	-1.23037	0.00202196	0.0136255	Down	Metal transporter Nramp5 [Morus notabilis]
Os03g0432277	2.63333	1.01	-1.38253	0.00203222	0.0136853	Down	Hypothetical protein.
Os04g0339400	7.65333	3.67667	-1.05769	0.00204739	0.0137781	Down	Aldo/keto reductase family protein.
Os11g0334938	1.26333	0.326667	-1.95134	0.00207462	0.0139455	Down	Similar to Class III peroxidase 111.
Os07g0587250	6.1	2.95333	-1.04647	0.00209289	0.0140397	Down	Hypothetical conserved gene.
Os01g0622066	4.03	1.99667	-1.01319	0.00209772	0.0140607	Down	Conserved hypothetical protein.
Os06g0220000	60.8267	18.0567	-1.75217	0.00210101	0.0140782	Down	Similar to Phi-1 protein.
Os01g0630300	4.18667	1.88	-1.15507	0.0021074	0.0141115	Down	Helix-loop-helix DNA-binding domain containing protein.
Os09g0570800	0.82	0.233333	-1.81323	0.00211049	0.0141242	Down	Isopenicillin N synthase family protein.
MSTRG.14134	1.04	0.13	-3	0.00212912	0.0142251	Down	PREDICTED: RPM1-interacting protein 4 [Oryza sativa Japonica Group]
Os03g0727800	2.41667	1.09333	-1.14429	0.00222519	0.0147339	Down	Cyclin-like F-box domain containing protein.
Os07g0144500	2.05	0.786667	-1.3818	0.00237289	0.0155179	Down	Similar to Patatin-like phospholipase family protein expressed.
Os05g0188750	0.316667	0.0133333	-4.56986	0.00239073	0.0156105	Down	Hypothetical protein.
Os09g0439000	1.37333	0.636667	-1.10907	0.00241846	0.01575	Down	Similar to predicted protein.
MSTRG.12588	2.71667	1.35333	-1.00532	0.00250057	0.0161852	Down	heat shock protein-related-like [Oryza sativa Japonica Group]
Os07g0676700	8.01333	3.69667	-1.11618	0.00264603	0.0169309	Down	Hypothetical protein.
Os01g0251400	317.633	96.7533	-1.71498	0.00292003	0.0183517	Down	Conserved hypothetical protein.
Os11g0173900	0.983333	0.48	-1.03465	0.00292942	0.018399	Down	Similar to Leucine Rich Repeat family protein expressed.
Os06g0294200	0.406667	0.163333	-1.31603	0.00294214	0.0184554	Down	Conserved hypothetical protein.
Os02g0570600	0.37	0.08	-2.20945	0.00300501	0.0187823	Down	Hypothetical protein.
Os01g0843700	5.43333	1.87333	-1.53623	0.00321593	0.01985	Down	Conserved hypothetical protein.
MSTRG.670	2.40333	1.11333	-1.11015	0.00325561	0.0200196	Down	PREDICTED: translation initiation factor IF-2 [Oryza sativa Japonica Group]
Os03g0162650	1.39667	0.553333	-1.33577	0.00333476	0.0204385	Down	Similar to fatty acid elongase.
Os09g0445500	3.53667	1.74333	-1.02054	0.00342327	0.020856	Down	Zinc finger C2H2-like domain containing protein.
Os06g0636700	16.2867	7.61333	-1.09709	0.0034268	0.0208732	Down	Esterase SGNH hydrolase-type domain containing protein.
Os01g0935200	3.21333	1.55333	-1.0487	0.00343194	0.0208917	Down	Histone-fold domain containing protein.
Os03g0281300	0.31	0.0866667	-1.83872	0.00345003	0.0209802	Down	phosphotransferase system PEP-utilising enzyme N-terminal domain containing protein.
Os08g0153900	1.88	0.846667	-1.15087	0.00347137	0.0210754	Down	Protein of unknown function DUF599 family protein.
Os05g0551700	0.666667	0.263333	-1.34008	0.00347299	0.0210767	Down	tRNA isopentenyltransferase family protein.
Os03g0639400	1.20333	0.3	-2.004	0.00357237	0.0216003	Down	Pectinesterase inhibitor domain containing protein.
Os05g0475475	2.5	1.01667	-1.29808	0.00358184	0.0216487	Down	Hypothetical gene.
Os04g0161400	0.653333	0.18	-1.85982	0.00358748	0.0216719	Down	Similar to OSIGBa0102O13.6 protein.
Os12g0207600	5.62333	2.50333	-1.16758	0.00378732	0.0226598	Down	Similar to ribulose-1 5-bisphosphate carboxylase/oxygenase large subunit.
Os06g0696500	2.65333	1.13667	-1.223	0.00404561	0.0239205	Down	Similar to Xyloglycan endo-transglycosylase precursor.
Os06g0696566	1.61667	0.426667	-1.92184	0.00404868	0.0239338	Down	Hypothetical conserved gene.
Os03g0107300	2.44333	1.04667	-1.22305	0.00421799	0.0247522	Down	Anion transporter Silicon efflux transporter Arsenic species (As) uptake
Os01g0877450	1.62	0.703333	-1.20371	0.00424935	0.0249011	Down	Hypothetical conserved gene.
Os03g0655100	1.48667	0.69	-1.10741	0.00428719	0.0250938	Down	Similar to Cupin RmlC-type.
MSTRG.2166	1.81333	0.833333	-1.12168	0.00443849	0.0258062	Down	--
Os10g0355800	1.68667	0.59	-1.51539	0.00455588	0.0263647	Down	Similar to ATP synthase CF1 beta subunit.
Os05g0399400	375.987	160.27	-1.23018	0.00466539	0.026831	Down	Chitinase 9.
Os10g0545600	1.98	0.94	-1.07477	0.00470432	0.0269868	Down	Similar to transposon protein.
Os01g0212900	1.66333	0.706667	-1.23498	0.00477088	0.0272948	Down	Hypothetical conserved gene.
Os12g0604500	1.82333	0.553333	-1.72036	0.00478874	0.0273705	Down	IQ motif EF-hand binding site domain containing protein.
Os11g0567600	0.533333	0.146667	-1.8625	0.0048013	0.0274212	Down	Leucine-rich repeat domain containing protein.
Os01g0616366	4.18	2.01333	-1.05392	0.0049569	0.0280935	Down	Hypothetical protein.
Os06g0156501	0.343333	0.0366667	-3.22707	0.00502617	0.0283885	Down	Conserved hypothetical protein.
Os08g0565750	0.2	0.001	-7.64386	0.00516415	0.0290617	Down	Hypothetical protein.
Os04g0631000	0.673333	0.153333	-2.13465	0.00538597	0.0300675	Down	Similar to H0105C05.4 protein.
Os04g0686800	2.74	1.09667	-1.32105	0.00565436	0.0312421	Down	Similar to H0701F11.2 protein.
Os12g0264800	0.853333	0.253333	-1.75207	0.0056743	0.0313333	Down	Conserved hypothetical protein.
Os03g0328300	2.76	1.15	-1.26303	0.00579183	0.0318341	Down	Hypothetical conserved gene.
Os08g0353700	0.916667	0.263333	-1.79951	0.00598636	0.0327396	Down	Conserved hypothetical protein.
Os01g0850050	1.43	0.63	-1.18259	0.00602552	0.0329153	Down	Hypothetical gene.
Os08g0494300	1.08667	0.496667	-1.12956	0.00606278	0.03306	Down	Copine domain containing protein.
Os03g0263600	0.246667	0.05	-2.30256	0.00618848	0.0335726	Down	Atypical strictosidine synthase Regulation of anther development and pollen wall formation
Os03g0699100	2.14667	0.866667	-1.30855	0.00635718	0.0343472	Down	WD40 repeat-like domain containing protein.
Os05g0299250	0.233333	0.0566667	-2.04182	0.0063579	0.0343472	Down	Hypothetical protein.
Os05g0177500	3.40333	1.58333	-1.10398	0.00641187	0.0345821	Down	UDP-glucuronosyl/UDP-glucosyltransferase family protein.
MSTRG.9274	0.786667	0.213333	-1.88264	0.00643123	0.0346716	Down	retrotransposon protein, putative, Ty3-gypsy subclass [Oryza sativa Japonica Group]
Os07g0462800	0.57	0.09	-2.66297	0.00653458	0.0351026	Down	O-methyltransferase family 2 domain containing protein.
Os06g0336500	0.19	0.0533333	-1.83289	0.00659734	0.0353702	Down	Similar to CSLD2 (Fragment).
Os03g0403400	0.85	0.316667	-1.4245	0.00688853	0.036586	Down	Six-bladed beta-propeller TolB-like domain containing protein.
Os04g0580500	1.47667	0.583333	-1.33995	0.00700605	0.0371121	Down	Protein of unknown function DUF1191 domain containing protein.
Os08g0421000	0.103333	0.0333333	-1.63227	0.00706752	0.0373244	Down	Conserved hypothetical protein.
MSTRG.28961	1.96333	0.966667	-1.02221	0.00734542	0.0384091	Down	--
Os11g0123600	0.263333	0.04	-2.71882	0.0073526	0.0384342	Down	Hypothetical conserved gene.
Os01g0909300	0.626667	0.23	-1.44606	0.00742454	0.0387476	Down	Hypothetical conserved gene.
Os07g0632000	0.66	0.206667	-1.67516	0.00744925	0.0388341	Down	Similar to Xylanase inhibitor protein I precursor.
Os11g0474500	0.173333	0.001	-7.43741	0.00750158	0.0390604	Down	NB-ARC domain containing protein.
Os01g0937900	4.76	2.27	-1.06827	0.00774623	0.0400321	Down	Conserved hypothetical protein.
MSTRG.200	1.19	0.513333	-1.21299	0.00781944	0.0403121	Down	--
Os09g0488600	1.48	0.633333	-1.22456	0.00800415	0.0410574	Down	Protein kinase PKN/PRK1 effector domain containing protein.
Os03g0706500	0.863333	0.283333	-1.60742	0.00821134	0.0418956	Down	TCP family transcription factor Negative regulator for lateral branching
Os02g0635800	6.24667	2.57667	-1.27758	0.00825689	0.0420846	Down	Transcription factor TCP domain containing protein.
Os06g0716100	42.2633	16.41	-1.36483	0.00858515	0.0434294	Down	Similar to Chaperone protein dnaJ.
Os06g0184200	0.866667	0.336667	-1.36416	0.00873222	0.0440042	Down	Hypothetical conserved gene.

## Sheet: Down-regulated DEGs in roots
Table S4. DEGs with expression not recovered after sulfate resupply: Down-regulagted DEGs in roots
Gene ID	CK_R_mean	S0_R_mean	log2(FC)	P_Value	FDR	Regulation Pattern	Annotation
Os01g0608101	86.0233	5.82667	-3.88399	2.27254e-90	2.20009e-87	Down	Conserved hypothetical protein.
Os03g0307200	1705.47	35.81	-5.57366	1.52802e-77	1.16231e-74	Down	Nicotianamine synthase 2 Nicotianamine biosynthesis
Os01g0495701	34.8033	2.28333	-3.93001	3.50135e-68	2.0715e-65	Down	Hypothetical conserved gene.
Os07g0258400	109.513	7.12667	-3.94174	5.00103e-67	2.80303e-64	Down	OsNramp1 (Integral membrane protein).
Os06g0102100	18.5733	0.383333	-5.59849	4.33427e-55	1.97816e-52	Down	Cytochrome P450 93G2 protein (CYP93G2) flavanone 2-hydroxylase (F2H) C-glycosylflavone biosynthesis
Os12g0236100	86.02	7.05667	-3.60761	4.1238e-53	1.82982e-50	Down	Hypothetical conserved gene.
Os11g0149900	25.3767	2.50667	-3.33966	2.66359e-51	1.07717e-48	Down	PAN-like type 2 domain containing protein.
Os01g0871600	33.76	1.23667	-4.77079	3.47447e-47	1.21981e-44	Down	Similar to Peptide transporter PTR2-B.
Os03g0431600	15.18	1.51333	-3.32637	4.80918e-46	1.55196e-43	Down	Hypothetical conserved gene.
Os08g0203400	35.34	2.47333	-3.83677	1.11672e-41	3.07561e-39	Down	Protein kinase core domain containing protein.
Os10g0195250	110.727	12.7167	-3.12221	9.55176e-41	2.52198e-38	Down	Conserved hypothetical protein.
Os12g0282000	49.0467	0.61	-6.3292	7.21018e-40	1.87277e-37	Down	Conserved hypothetical protein.
Os07g0432100	59.4667	2.77333	-4.42239	4.16901e-39	1.01673e-36	Down	Hypothetical conserved gene.
Os10g0481500	10.62	0.466667	-4.50825	3.19546e-36	6.99237e-34	Down	Similar to Flotillin-like protein 1.
Os11g0484000	257.07	72.1067	-1.83396	9.125e-35	1.88081e-32	Down	Class II aldolase/adducin N-terminal family protein.
Os03g0107300	462.803	64.08	-2.85245	2.78086e-34	5.65879e-32	Down	Anion transporter Silicon efflux transporter Arsenic species (As) uptake
Os07g0162500	15.5267	2.02	-2.94232	3.22462e-34	6.52026e-32	Down	Alpha/beta hydrolase fold-3 domain containing protein.
Os03g0237201	38.0767	4.46667	-3.09164	5.77811e-34	1.15374e-31	Down	Hypothetical protein.
Os10g0105700	25.16	3.62	-2.79707	1.20093e-33	2.35382e-31	Down	Similar to predicted protein.
Os11g0134900	127.513	2.36667	-5.75165	1.30686e-33	2.54583e-31	Down	Similar to Major facilitator superfamily antiporter.
Os10g0538450	11.8633	0.333333	-5.1534	6.67612e-33	1.25464e-30	Down	Hypothetical protein.
Os11g0129000	25.0033	3.18333	-2.97351	1.41584e-32	2.58475e-30	Down	Similar to Transparent testa 12 protein.
Os08g0353700	14.7567	0.54	-4.77226	2.61262e-32	4.74249e-30	Down	Conserved hypothetical protein.
Os02g0649900	122.433	15.53	-2.97887	3.98889e-32	7.11939e-30	Down	Metal-nicotianamine (NA) transporter Fe and Mn transport to the endosperm
Os12g0555100	14.5067	1.44	-3.33258	4.65954e-31	7.96058e-29	Down	Similar to Probenazole-inducible protein PBZ1.
Os02g0529800	19.66	1.94667	-3.33619	1.93486e-30	3.18634e-28	Down	Cytochrome P450 family protein.
Os09g0409100	9715.5	470.84	-4.36698	4.03139e-30	6.5378e-28	Down	Conserved hypothetical protein.
Os04g0109400	7.58	0.94	-3.01147	5.00586e-30	7.99635e-28	Down	Similar to H0201G08.3 protein.
Os12g0589100	627.743	165.55	-1.92291	8.30801e-30	1.31398e-27	Down	Similar to Adenine phosphoribosyltransferase.
Os03g0594900	10.09	0.306667	-5.04011	1.43139e-29	2.24167e-27	Down	Cytochrome P450 family protein.
Os04g0410400	30.87	4.12	-2.90549	3.0817e-29	4.71072e-27	Down	Root cap family protein.
Os04g0581100	20.6067	3.28333	-2.64988	5.43915e-29	8.15821e-27	Down	2OG-Fe(II) oxygenase domain containing protein.
Os12g0125800	6.79333	0.82	-3.05042	7.46761e-28	1.04638e-25	Down	Similar to Transparent testa 12 protein.
Os09g0471550	6.39333	0.806667	-2.98652	9.45528e-28	1.30206e-25	Down	EGF-like calcium-binding domain containing protein.
Os02g0788800	71.3767	13.4567	-2.40713	1.33208e-27	1.80328e-25	Down	Amino acid transporter transmembrane domain containing protein.
Os08g0556300	147.303	21.2233	-2.79507	1.58078e-27	2.13091e-25	Down	Glycolipid transfer protein domain domain containing protein.
Os07g0432201	5363.36	339.997	-3.97954	1.66142e-27	2.22088e-25	Down	Similar to Thionin-like peptide.
MSTRG.31666	10.3833	0.33	-4.97566	2.54817e-27	3.33643e-25	Down	alcohol oxidase-like [Oryza sativa Japonica Group]
Os08g0118100	14.1167	2.78	-2.34424	2.78077e-27	3.61139e-25	Down	Similar to F5O11.14 (ACR8).
Os12g0236225	44.7467	2.56	-4.12756	6.71208e-27	8.40931e-25	Down	Conserved hypothetical protein.
Os11g0501000	34.7833	6.1	-2.51152	8.46652e-27	1.04841e-24	Down	Conserved hypothetical protein.
Os11g0250600	13.4467	0.793333	-4.08318	1.05344e-26	1.28947e-24	Down	Similar to cDNA clone:001-115-E06 full insert sequence.
Os05g0579200	8.94667	0.63	-3.82793	1.28934e-26	1.56623e-24	Down	AMP-dependent synthetase and ligase domain containing protein.
Os07g0158500	22.3733	2.84	-2.97782	2.41944e-26	2.85226e-24	Down	Similar to HAP2 subunit of HAP complex.
Os10g0554200	77.0867	14.11	-2.44976	3.5823e-26	4.1922e-24	Down	TGF-beta receptor type I/II extracellular region family protein.
Os07g0280200	13.5567	1.59667	-3.08587	3.61627e-26	4.21651e-24	Down	AMP-dependent synthetase and ligase domain containing protein.
MSTRG.31663	24.1233	0.0333333	-9.49925	4.97895e-26	5.76332e-24	Down	hypothetical protein OsI_28913 [Oryza sativa Indica Group]
Os03g0751100	233.173	24.2467	-3.26554	8.22106e-26	9.21567e-24	Down	Iron-deficiency-regulated oligopeptide transporter Iron homeostasis
Os09g0361200	8.35	0.133333	-5.96867	1.48649e-25	1.6376e-23	Down	Similar to hypersensitive-induced response protein.
Os07g0510500	10.2833	0.853333	-3.59105	2.98613e-25	3.223e-23	Down	UDP-glucuronosyl/UDP-glucosyltransferase family protein.
Os02g0650300	69.41	1.65333	-5.39169	4.12327e-25	4.43536e-23	Down	Iron-phytosiderophore transporter Iron homeostasis
Os03g0237100	199.49	23.76	-3.06971	7.00331e-25	7.43328e-23	Down	Similar to NADPH-dependent codeinone reductase (EC 1.1.1.247).
Os01g0691100	20.6033	2.88333	-2.83707	9.62075e-25	1.00403e-22	Down	Plant lipid transfer protein/seed storage/trypsin-alpha amylase inhibitor domain containing protein.
Os11g0151500	14.7867	3.02	-2.29168	1.76656e-24	1.81569e-22	Down	Major facilitator superfamily protein.
Os12g0291400	37.2667	1.60667	-4.53574	1.7675e-24	1.81569e-22	Down	Similar to Petunia ribulose 1 5-bisphosphate carboxylase small subunit mRNA (clone pSSU 51) partial cds. (Fragment).
Os10g0538200	110.887	15.9833	-2.79445	2.85388e-24	2.89447e-22	Down	Peptidase aspartic catalytic domain containing protein.
Os02g0306401	244.43	23.82	-3.35918	2.00774e-23	1.89773e-21	Down	Similar to Nicotianamine aminotransferase A.
Os07g0680400	77.9733	9.91333	-2.97554	3.7522e-23	3.50513e-21	Down	WRKY transcription factor Drought tolerance
MSTRG.30340	49.0567	8.98667	-2.44859	4.43319e-23	4.11719e-21	Down	PREDICTED: momilactone A synthase-like isoform X1 [Oryza sativa Japonica Group]
Os07g0141400	59.0133	10.9333	-2.43231	7.49784e-23	6.88337e-21	Down	Similar to 23 kDa polypeptide of photosystem II.
Os09g0481200	162.86	16.9067	-3.26797	8.12788e-23	7.39799e-21	Down	Similar to photosystem I reaction center subunit V.
Os01g0794800	48.1233	12.4133	-1.95485	1.36911e-22	1.22179e-20	Down	Similar to Subtilase.
Os10g0403000	17.37	2.77333	-2.6469	1.95641e-22	1.72185e-20	Down	Cytochrome P450 protein CYP78A11 Regulation of leaf initiation rate and vegetative-reproductive phase change
Os01g0871500	370.283	80.92	-2.19406	4.0338e-22	3.45501e-20	Down	TGF-beta receptor type I/II extracellular region family protein.
Os01g0220700	23.1033	4.6	-2.3284	7.1938e-22	6.09622e-20	Down	Similar to predicted protein.
Os12g0291066	82.1733	4.74	-4.11571	8.30121e-22	7.01606e-20	Down	Hypothetical gene.
Os05g0292800	24.8467	2.82	-3.13929	1.39044e-21	1.15381e-19	Down	Similar to One helix protein (OHP).
Os07g0442800	4.43	0.213333	-4.37613	1.67252e-21	1.38293e-19	Down	Conserved hypothetical protein.
Os10g0530400	16.6133	3.07	-2.43603	2.5397e-21	2.04464e-19	Down	Similar to Glutathione-S-transferase Cla47.
Os01g0952900	10.3733	1.23333	-3.07224	3.10422e-21	2.46088e-19	Down	Conserved hypothetical protein.
Os02g0791300	3.95	0.0333333	-6.88874	3.44479e-21	2.72411e-19	Down	Hypothetical conserved gene.
Os08g0203300	10.9033	2.84333	-1.93911	4.89092e-21	3.82978e-19	Down	Similar to SHR5-receptor-like kinase (Fragment).
Os04g0445000	31.0633	4.75	-2.70921	5.35501e-21	4.15247e-19	Down	Similar to Potassium channel SKOR (Stelar K(+) outward rectifying channel).
Os07g0532800	21.1133	4.26333	-2.3081	8.05769e-21	6.15854e-19	Down	Peptidase A1 domain containing protein.
Os05g0411100	14.0433	3.82667	-1.87573	8.10317e-21	6.17852e-19	Down	Similar to peptide transporter PTR2.
Os02g0301100	95.0033	10.83	-3.13294	8.67154e-21	6.59615e-19	Down	RAG1-activating protein 1 homologue domain containing protein.
Os09g0564200	105.187	4.02667	-4.70722	1.55899e-20	1.16917e-18	Down	Hypothetical conserved gene.
MSTRG.31677	23.95	0.001	-14.5477	1.63428e-20	1.22276e-18	Down	--
Os04g0109100	5.62667	0.523333	-3.42648	1.84903e-20	1.37379e-18	Down	Concanavalin A-like lectin/glucanase domain containing protein.
Os02g0744700	28.9933	3.97333	-2.8673	1.98882e-20	1.4708e-18	Down	Similar to Starch synthase isoform zSTSII-2 (EC 2.4.1.21).
Os02g0684500	75.0233	17.2567	-2.12019	2.4417e-20	1.79741e-18	Down	Similar to Histone H4.
Os01g0965900	54.5833	14.2267	-1.93986	2.68638e-20	1.95946e-18	Down	Conserved hypothetical protein.
Os10g0573700	26.8167	6.71	-1.99875	5.12259e-20	3.67768e-18	Down	Similar to Mitochondrial carnitine/acylcarnitine carrier-like protein (A BOUT DE SOUFFLE) (Carnitine/acylcarnitine translocase-like protein) (CAC-like protein).
Os02g0582900	814.397	121.277	-2.74743	6.73578e-20	4.80384e-18	Down	Conserved hypothetical protein.
Os01g0636500	11.89	1.24333	-3.25746	8.98527e-20	6.365e-18	Down	Similar to Polygalacturonase PG2.
Os12g0226900	44.19	2.79	-3.98538	9.91813e-20	6.9948e-18	Down	Similar to Allyl alcohol dehydrogenase.
Os05g0478700	4.04333	0.263333	-3.94058	1.08658e-19	7.64625e-18	Down	Hypothetical conserved gene.
Os12g0291733	37.8167	1.76333	-4.42265	1.56169e-19	1.08699e-17	Down	Hypothetical gene.
Os12g0135800	129.307	16.6667	-2.95576	1.89835e-19	1.3099e-17	Down	Alpha/beta hydrolase fold-3 domain containing protein.
MSTRG.20443	3.41333	0.3	-3.50815	4.34722e-19	2.92389e-17	Down	PREDICTED: protein BEARSKIN2-like [Oryza sativa Japonica Group]
Os06g0599200	30.7733	3.79667	-3.01888	4.7415e-19	3.15268e-17	Down	Cytochrome P450 family protein.
Os01g0655500	75.0167	15.35	-2.28897	4.74659e-19	3.15268e-17	Down	Protein kinase core domain containing protein.
Os08g0352100	21.9233	1.68333	-3.70307	5.02583e-19	3.32433e-17	Down	Conserved hypothetical protein.
MSTRG.31688	1.79333	0.0533333	-5.07146	5.2913e-19	3.49269e-17	Down	--
Os07g0257200	52.0467	11.9067	-2.12804	5.69056e-19	3.7331e-17	Down	Manganese and Cadmium transporter Mn and Cd uptake
Os06g0296700	7.70667	2.41667	-1.67309	5.9411e-19	3.88948e-17	Down	C-type lectin conserved site domain containing protein.
Os10g0537800	289.89	72.2933	-2.00357	6.04223e-19	3.94759e-17	Down	Peptidase aspartic catalytic domain containing protein.
Os03g0227700	21.9933	2.85333	-2.94635	7.53871e-19	4.87544e-17	Down	Cytochrome P450 90B2 Brassinosteroid C-22 hydroxylase Brassinosteroids biosynthesis
Os07g0499500	8.92333	0.756667	-3.55985	1.65363e-18	1.04822e-16	Down	Similar to Peroxidase 7 precursor (EC 1.11.1.7) (Atperox P7) (ATP30).
MSTRG.25553	7.37	1.66333	-2.14759	1.66472e-18	1.05316e-16	Down	--
Os03g0667100	29.07	10.4233	-1.47971	2.8223e-18	1.74742e-16	Down	Similar to NPR1-like protein.
Os07g0639000	61.7733	5.24333	-3.55843	2.90237e-18	1.79006e-16	Down	Similar to Class III peroxidase 46.
Os01g0249050	9.88333	0.656667	-3.91176	3.09619e-18	1.90225e-16	Down	Hypothetical protein.
Os09g0472700	96.5933	5.35333	-4.17341	3.14434e-18	1.92075e-16	Down	Similar to blight-associated protein p12.
Os12g0135500	15.56	2.15333	-2.8532	3.41223e-18	2.07646e-16	Down	Similar to cDNA clone:006-207-G09 full insert sequence.
Os01g0608200	5.89667	0.293333	-4.32929	3.7084e-18	2.24812e-16	Down	Hypothetical protein.
Os01g0215500	15.72	1.44	-3.44846	5.62545e-18	3.35928e-16	Down	Similar to esterase.
Os09g0471500	5.87333	1.3	-2.17567	6.99922e-18	4.16408e-16	Down	Conserved hypothetical protein.
Os09g0346500	363.257	33.59	-3.43489	7.601e-18	4.48866e-16	Down	Similar to Chlorophyll a-b binding protein chloroplast precursor (LHCII type I CAB) (LHCP).
Os10g0409400	6.61333	0.001	-12.6912	8.93102e-18	5.245e-16	Down	beta subunit of polygalacturonase 1 Abiotic stress response
Os04g0581502	4.96667	0.26	-4.25569	9.44343e-18	5.52876e-16	Down	Zinc finger RING-CH-type domain containing protein.
Os11g0135000	6.12333	1.43667	-2.09159	9.51358e-18	5.55649e-16	Down	Similar to Major facilitator superfamily antiporter.
Os07g0683900	355.433	142.81	-1.31548	1.52973e-17	8.68058e-16	Down	Ricin B-related lectin domain containing protein.
Os10g0555900	119.69	33.7133	-1.82791	2.62769e-17	1.45745e-15	Down	Similar to Beta-expansin.
Os06g0676400	2.64667	0.356667	-2.89153	2.8511e-17	1.5759e-15	Down	Conserved hypothetical protein.
Os03g0857900	27.7433	5.58667	-2.31208	2.92983e-17	1.61383e-15	Down	Similar to Lysine decarboxylase-like protein.
Os03g0195100	66.9767	6.60333	-3.34239	3.09696e-17	1.70296e-15	Down	Putative aminotransferase Disease resistance response against infection with rice blast fungus
Os07g0174900	11.9867	1.59333	-2.91131	3.41219e-17	1.86986e-15	Down	Plant lipid transfer protein and hydrophobic protein helical domain containing protein.
Os01g0249100	12.9133	1.75333	-2.88069	3.49923e-17	1.91427e-15	Down	Similar to Expansin-A9.
Os01g0723400	331.453	130.32	-1.34675	3.51085e-17	1.91734e-15	Down	NADP-malic enzyme Splicing variant
Os09g0417800	36.96	5.44	-2.76429	3.94875e-17	2.14914e-15	Down	WRKY transcription factor Transcriptional repressor Pathogen defense
Os04g0588700	9.81667	2.63667	-1.89652	4.26046e-17	2.31092e-15	Down	ABC transporter-like domain containing protein.
Os02g0753500	11.6967	3.07667	-1.92666	4.9658e-17	2.67986e-15	Down	Tetratricopeptide-like helical domain containing protein.
Os04g0542800	16.03	4.18	-1.9392	5.99047e-17	3.22738e-15	Down	Transporter of the Copper-Nicotianamine Complex Fe(III)-deoxymugineic acid transporter Copper distribution Allocation of iron
Os07g0526400	37.2233	2.39333	-3.95911	6.98002e-17	3.74786e-15	Down	Polyketide synthase type III domain containing protein.
Os03g0417700	5.04667	0.103333	-5.60995	8.75732e-17	4.67076e-15	Down	Similar to Phytochrome P450.
Os11g0186900	33.9533	8.72	-1.96115	1.01269e-16	5.35653e-15	Down	ACC oxidase Ethylene biosynthesis
Os04g0234600	26.26	1.89	-3.79641	1.05944e-16	5.58531e-15	Down	Similar to Sedoheptulose-1 7-bisphosphatase.
Os06g0683000	2.47	0.186667	-3.72597	1.32317e-16	6.89604e-15	Down	Zinc finger C2H2-like domain containing protein.
Os10g0560400	2.57	0.153333	-4.06703	1.3454e-16	7.00046e-15	Down	Similar to CONSTANS-like protein CO9 (Fragment).
Os01g0608300	7.02333	0.15	-5.54912	1.56103e-16	8.08293e-15	Down	Similar to aspartic proteinase nepenthesin-2.
Os01g0795000	55.01	18.25	-1.5918	1.71541e-16	8.86796e-15	Down	Subtilase.
Os04g0604200	6.03333	0.646667	-3.22186	1.84827e-16	9.53934e-15	Down	Similar to Xyloglucan endotransglycosylase (Fragment).
Os07g0430501	428.35	46.6067	-3.20018	1.93755e-16	9.96792e-15	Down	Similar to Thionin-like peptide.
Os11g0107000	62.5633	14.3033	-2.12897	2.24959e-16	1.14625e-14	Down	Xylan acetyltransferase Resistance to bacterial leaf blight disease
Os11g0305400	7.42333	1.21	-2.61706	2.45324e-16	1.24802e-14	Down	Similar to O-methyltransferase family protein.
Os04g0154800	7.58333	1.38667	-2.45121	2.6574e-16	1.3476e-14	Down	Protein of unknown function DUF594 family protein.
Os04g0414700	116.307	11.8333	-3.29701	2.71501e-16	1.37245e-14	Down	Photosystem I PsaO domain containing protein.
Os10g0516100	5.29333	0.403333	-3.71413	2.94238e-16	1.48036e-14	Down	H subunit of glycine decarboxylase complex (GDC) Photorespiration
Os03g0400200	16.8567	1.71333	-3.29844	3.39229e-16	1.69604e-14	Down	Plant disease resistance response protein domain containing protein.
Os07g0258501	4.33333	0.176667	-4.61638	3.41613e-16	1.70529e-14	Down	Hypothetical protein.
Os05g0135000	12.44	1.57667	-2.98004	3.67811e-16	1.8275e-14	Down	Haem peroxidase family protein.
Os04g0128900	9.3	1.67	-2.47738	4.40562e-16	2.16873e-14	Down	Flavin monooxygenase-like enzyme Auxin biosynthesis
Os01g0213800	3.55333	0.46	-2.94947	4.93584e-16	2.426e-14	Down	Plant-specific transcription factor miR319 target gene
Os12g0291100	175.09	9.47667	-4.20757	4.94521e-16	2.42688e-14	Down	Similar to Petunia ribulose 1 5-bisphosphate carboxylase small subunit mRNA (clone pSSU 51) partial cds. (Fragment).
Os05g0372900	4.83333	0.553333	-3.1268	5.32245e-16	2.60401e-14	Down	Conserved hypothetical protein.
Os05g0551000	15.6933	5.11333	-1.61782	6.09063e-16	2.97074e-14	Down	Iron-binding haemerythrin RING ubiquitin ligase Iron-binding sensor Regulation of iron acquisition
Os03g0227601	1.27667	0.203333	-2.65046	6.67897e-16	3.25274e-14	Down	Hypothetical gene.
Os08g0503000	83.13	20.3333	-2.03152	6.97547e-16	3.38682e-14	Down	Hypothetical protein.
Os12g0416800	9.12667	1.77667	-2.36092	7.38407e-16	3.57976e-14	Down	Conserved hypothetical protein.
Os04g0340300	102.817	12.1333	-3.08303	8.00009e-16	3.86083e-14	Down	Terpene synthase (S)-limonene synthase Defence against M. oryzae
Os02g0101500	6.14	0.48	-3.67713	9.12741e-16	4.37842e-14	Down	Peroxisomal hydroxypyruvate reductase NADH-dependent HPR Photorespiratory metabolism
Os06g0188400	1.86667	0.163333	-3.51457	1.04146e-15	4.95867e-14	Down	Extracellular ligand-binding receptor domain containing protein.
MSTRG.1937	1.94333	0.123333	-3.9779	1.23565e-15	5.83974e-14	Down	--
Os09g0309200	10.0933	2.48	-2.02499	1.27548e-15	6.01018e-14	Down	Calmodulin binding protein-like family protein.
Os12g0242500	8.84	2.65667	-1.73443	1.3043e-15	6.12792e-14	Down	Conserved hypothetical protein.
Os08g0444500	4.85	0.283333	-4.09741	1.32981e-15	6.2386e-14	Down	Conserved hypothetical protein.
Os03g0786100	24.9567	2.00667	-3.63655	1.36676e-15	6.40253e-14	Down	Glycolate oxidase Photorespiratory enzyme Strong regulation over photosynthesis Feed-back inhibition on Rubisco activase
Os04g0381700	28.9633	4.28	-2.75854	1.59136e-15	7.37893e-14	Down	Similar to OSIGBa0092E09.4 protein.
Os09g0564400	4.15	0.001	-12.0189	1.59691e-15	7.39394e-14	Down	Hypothetical conserved gene.
Os07g0429600	76.88	8.92667	-3.10641	1.73871e-15	8.03882e-14	Down	Similar to Thionin-like peptide.
Os01g0130400	20.8733	5.75	-1.86003	1.78559e-15	8.21991e-14	Down	Similar to Alpha-xylosidase precursor (Fragment).
MSTRG.28993	6.29667	0.283333	-4.47402	1.84762e-15	8.4932e-14	Down	--
Os07g0596000	6.10333	1.56	-1.96805	2.06235e-15	9.41258e-14	Down	Zinc finger DHHC-type domain containing protein.
Os03g0439800	73.89	24.7833	-1.57601	2.4284e-15	1.0989e-13	Down	Protein of unknown function DUF1909 domain containing protein.
Os01g0963000	134.96	9.87667	-3.77236	2.67355e-15	1.20813e-13	Down	Similar to Peroxidase BP 1 precursor.
Os06g0725000	32.38	11.6633	-1.47312	2.77794e-15	1.25176e-13	Down	Similar to Senescence-associated protein DIN1.
Os03g0133300	22.3667	6.94	-1.68834	3.01404e-15	1.35433e-13	Down	Similar to F7F22.5.
Os05g0411150	3.58667	0.72	-2.31657	3.15026e-15	1.41157e-13	Down	Hypothetical protein.
Os06g0169001	24.0967	1.01667	-4.56691	3.81237e-15	1.69634e-13	Down	GOS9 protein.
Os06g0474300	2.56333	0.293333	-3.12741	4.07736e-15	1.8042e-13	Down	Methyltransferase type 11 domain containing protein.
Os06g0108600	5.07	0.39	-3.70044	4.53828e-15	1.9971e-13	Down	Similar to Expansin-A17.
Os06g0549600	23.4733	7.83333	-1.58332	6.51637e-15	2.81712e-13	Down	FAD-linked oxidase FAD-binding subdomain 2 domain containing protein.
Os12g0420400	122.9	11.3567	-3.43587	6.57818e-15	2.84e-13	Down	Similar to Photosystem I reaction center subunit XI chloroplast precursor (PSI- L) (PSI subunit V).
Os07g0171100	12.3767	1.04333	-3.56835	6.73607e-15	2.90424e-13	Down	Tetratricopeptide-like helical domain containing protein.
Os01g0608000	1.82	0.05	-5.18587	7.49347e-15	3.22643e-13	Down	Hypothetical conserved gene.
Os04g0690800	84.7	9.99	-3.08381	7.82195e-15	3.35881e-13	Down	22-kDa Photosystem II protein Photoprotection
Os11g0180200	94.9467	32.75	-1.53562	8.69785e-15	3.71993e-13	Down	Similar to Protein tyrosine phosphatase 1.
Os12g0259800	74.4033	17.0033	-2.12955	8.95839e-15	3.82624e-13	Down	Similar to Laccase-25.
Os02g0678200	2.83	0.37	-2.9352	8.97651e-15	3.82886e-13	Down	SPX-MFS protein Pi homeostasis
Os02g0218800	106.273	28.8733	-1.87997	9.03459e-15	3.84337e-13	Down	Allene oxide synthase (CYP74A4) Fatty acid 9-/13-hydroperoxide lyase (CYP74C) Biosynthesis of jasmonic acid (JA) Plant defense
Os06g0673700	56.4167	14.59	-1.95114	9.17651e-15	3.89855e-13	Down	Hypothetical protein.
Os07g0435300	37.2567	3.22667	-3.52938	9.67901e-15	4.09028e-13	Down	Photosystem I reaction center subunit IV chloroplast precursor (PSI- E) (Photosystem I 10.8 kDa polypeptide).
Os10g0530200	12.1467	3.26333	-1.89614	9.94694e-15	4.19795e-13	Down	Similar to Glutathione S-transferase TSI-1 (EC 2.5.1.18) (Glutathione S- transferase 1).
Os03g0413000	6.07	1.11	-2.45114	1.37401e-14	5.67876e-13	Down	Similar to Potential histone-like transcription factor.
MSTRG.5651	6.03333	0.826667	-2.86758	1.50273e-14	6.17083e-13	Down	--
Os10g0417600	201.537	75.4433	-1.41758	1.92644e-14	7.78075e-13	Down	NAD(P)-binding domain containing protein.
Os02g0698800	16.59	3.6	-2.20425	1.9428e-14	7.83693e-13	Down	WRKY transcription factor 66.
MSTRG.5323	3.72333	0.0566667	-6.03795	2.09832e-14	8.42175e-13	Down	PREDICTED: cysteine-rich repeat secretory protein 8-like [Oryza sativa Japonica Group]
Os06g0486800	205.707	60.8567	-1.7571	2.11027e-14	8.45907e-13	Down	Similar to Formate dehydrogenase mitochondrial precursor (EC 1.2.1.2) (NAD- dependent formate dehydrogenase) (FDH).
Os06g0202700	7.03667	1.47333	-2.25581	2.68936e-14	1.06865e-12	Down	Conserved hypothetical protein.
Os08g0160300	3.79667	0.57	-2.7357	2.77336e-14	1.09793e-12	Down	Similar to KANADI-like transcription factor FEATHERED.
Os03g0379300	69.12	18.8433	-1.87505	2.89608e-14	1.1451e-12	Down	Helix-loop-helix DNA-binding domain containing protein.
Os07g0148900	123.297	11.0233	-3.4835	3.03192e-14	1.19437e-12	Down	Photosystem I protein-like protein.
Os01g0653200	2.35	0.26	-3.17608	3.30584e-14	1.29748e-12	Down	Glycosyl transferase group 1 domain containing protein.
Os02g0779400	7.27	0.183333	-5.30941	3.32424e-14	1.3031e-12	Down	Hypothetical conserved gene.
Os04g0306400	202.62	54.93	-1.88311	3.76326e-14	1.46762e-12	Down	Ribose 5-phosphate isomerase family protein.
Os02g0170100	206.927	61.2533	-1.75626	3.83419e-14	1.49202e-12	Down	Glycine cleavage H-protein family protein.
Os04g0430900	19.4267	4.86667	-1.99703	3.96377e-14	1.54057e-12	Down	Magnesium transporter MRS2-F.
Os09g0414900	4.90667	0.08	-5.9386	4.68227e-14	1.80228e-12	Down	Similar to GASA5-like protein (Fragment).
Os11g0242800	158.797	22.4733	-2.82089	4.73085e-14	1.81582e-12	Down	Similar to ASCAB9-A (ASCAB9-B) (Fragment).
Os02g0705100	9.36	1.59667	-2.55145	5.58179e-14	2.11962e-12	Down	Alpha/beta hydrolase fold-1 domain containing protein.
Os02g0528500	7.29333	0.91	-3.00264	5.74143e-14	2.17331e-12	Down	Nucleic acid-binding OB-fold domain containing protein.
Os04g0400700	15.27	1.41667	-3.43013	6.2993e-14	2.36487e-12	Down	Similar to OSIGBa0113L04.5 protein.
Os08g0561800	15.9467	5.20667	-1.61482	6.35273e-14	2.38212e-12	Down	Similar to Mov34/MPN/PAD-1 family protein.
Os11g0521500	117.947	35.1467	-1.74667	6.56635e-14	2.45646e-12	Down	Similar to Acyl carrier protein chloroplast precursor (ACP) (ACP05) (Clone 29C08).
Os07g0635900	208.88	58.7967	-1.82887	7.40289e-14	2.75329e-12	Down	Hydrophobic protein LTI6A (Low temperature-induced protein 6A).
Os01g0595600	28.6733	4.10667	-2.80367	8.17625e-14	3.01983e-12	Down	Alpha/beta hydrolase fold-1 domain containing protein.
Os05g0582800	16.8333	5.82333	-1.5314	1.01242e-13	3.71779e-12	Down	Peptidase S10 serine carboxypeptidase family protein.
Os06g0101600	162.933	16.3567	-3.31633	1.01916e-13	3.73825e-12	Down	Plastocyanin chloroplast precursor.
Os02g0542600	10.88	1.98333	-2.45568	1.04294e-13	3.808e-12	Down	Hypothetical protein.
Os10g0100300	6.69333	0.666667	-3.32769	1.11041e-13	4.03588e-12	Down	NAD(P)-binding domain containing protein.
Os01g0355250	31.06	1.51333	-4.35926	1.1227e-13	4.07592e-12	Down	Similar to Salt stress-induced protein.
Os05g0217700	301.497	64.5133	-2.22447	1.13589e-13	4.11913e-12	Down	BURP domain containing protein.
Os11g0109700	3.94667	0.72	-2.45457	1.1417e-13	4.13549e-12	Down	Protein of unknown function Cys-rich family protein.
Os06g0314501	46.2867	14.2967	-1.69492	1.26798e-13	4.57735e-12	Down	Conserved hypothetical protein.
Os02g0267200	15.7833	4.92333	-1.68069	1.28415e-13	4.62524e-12	Down	Alpha-expansin OsEXPA13.
Os12g0105500	19.45	6.80667	-1.51475	1.2944e-13	4.65692e-12	Down	Similar to Phosphatidate cytidylyltransferase family protein expressed.
Os04g0120300	11.49	0.73	-3.97634	1.3202e-13	4.73906e-12	Down	Similar to OSIGBa0115D20.4 protein.
Os11g0134950	1.66333	0.0366667	-5.50346	1.44725e-13	5.17189e-12	Down	Hypothetical protein.
Os09g0453800	152.137	52.5633	-1.53324	1.56088e-13	5.57172e-12	Down	1-aminocyclopropane-1-carboxylate synthase family protein.
Os09g0503000	7.37	0.68	-3.43806	1.77623e-13	6.30521e-12	Down	Alcohol dehydrogenase superfamily zinc-containing protein.
Os04g0227500	98.79	29.27	-1.75494	1.86918e-13	6.59123e-12	Down	DSBA oxidoreductase family protein.
Os12g0263000	98.4867	35.2833	-1.48094	1.94801e-13	6.86163e-12	Down	Similar to Glutathione synthase.
Os06g0155500	36.8367	13.8667	-1.40952	2.19794e-13	7.68269e-12	Down	Transferase family protein.
Os09g0548400	6.74667	2.23333	-1.59498	2.23369e-13	7.7906e-12	Down	Dimethylaniline monooxygenase N-oxide-forming domain containing protein.
Os04g0616700	45.76	14.3567	-1.67237	2.25533e-13	7.85751e-12	Down	Hypothetical conserved gene.
Os08g0556400	22.8033	6.73	-1.76057	2.55532e-13	8.8448e-12	Down	Zinc finger DHHC-type domain containing protein.
Os08g0441600	3.85	0.566667	-2.76429	2.71715e-13	9.36436e-12	Down	Similar to Chorismate mutase CM2 (EC 5.4.99.5) (Chorimate mutase).
Os02g0527600	18.1733	6.55333	-1.47152	2.77075e-13	9.52853e-12	Down	Similar to CTR1-like protein kinase.
Os05g0579300	8.77	2.72	-1.68897	3.17457e-13	1.08356e-11	Down	Homeodomain-related domain containing protein.
Os06g0676700	60.9033	23.98	-1.34469	3.18928e-13	1.08742e-11	Down	Similar to High pI alpha-glucosidase.
Os10g0450400	2.28667	0.276667	-3.04703	3.40634e-13	1.15772e-11	Down	Protein of unknown function DUF594 family protein.
Os03g0735000	5.62	0.696667	-3.01203	4.41179e-13	1.47435e-11	Down	Similar to Glucose-1-phosphate adenylyltransferase large subunit 2 (EC 2.7.7.27) (ADP-glucose synthase) (ADP-glucose pyrophosphorylase) (AGPASE S) (Alpha-D-glucose-1-phosphate adenyl transferase) (BLPL) (Fragment).
Os08g0263400	4.4	0.383333	-3.52083	4.70608e-13	1.56615e-11	Down	Hypothetical protein.
Os08g0101900	24.1367	2.45333	-3.29841	4.85672e-13	1.61291e-11	Down	UPF0497 membrane protein 2.
Os12g0292301	53.8267	2.90667	-4.21088	4.86236e-13	1.61311e-11	Down	Hypothetical gene.
Os03g0851700	70.63	21.3067	-1.72898	4.96596e-13	1.64407e-11	Down	Similar to TGB12K interacting protein 3.
Os06g0199400	45.4533	14.2033	-1.67816	4.98807e-13	1.64968e-11	Down	Conserved hypothetical protein.
Os04g0140400	25.47	2.26667	-3.49015	5.84791e-13	1.92409e-11	Down	Conserved hypothetical protein.
Os06g0704100	3.49667	0.583333	-2.58359	5.91646e-13	1.94464e-11	Down	Protein of unknown function DUF547 domain containing protein.
Os08g0130100	9.50333	1.24333	-2.93422	6.27838e-13	2.05725e-11	Down	Zinc finger LSD1-type domain containing protein.
Os11g0585100	24.8567	7.15	-1.79762	6.98909e-13	2.2831e-11	Down	Conserved hypothetical protein.
Os04g0675000	44.7933	14.1067	-1.66691	7.35136e-13	2.3941e-11	Down	Similar to H0103C06.5 protein.
Os12g0438600	92.3133	40.6	-1.18506	8.06899e-13	2.61183e-11	Down	Similar to chloride channel protein.
Os12g0228700	2.79	0.113333	-4.62162	8.45333e-13	2.7252e-11	Down	Similar to 32 kDa protein.
Os03g0764000	3.08	0.366667	-3.07039	8.81821e-13	2.8371e-11	Down	Acyl-CoA N-acyltransferase domain containing protein.
Os04g0494600	5.74667	1.41	-2.02703	9.13917e-13	2.93151e-11	Down	Protein of unknown function DUF642 family protein.
Os10g0193100	15.0033	1.39	-3.43213	9.48224e-13	3.03242e-11	Down	Conserved hypothetical protein.
MSTRG.22236	65.0767	11.5633	-2.49258	1.03784e-12	3.30098e-11	Down	PREDICTED: casparian strip membrane protein 1 [Oryza sativa Japonica Group]
Os07g0542900	4.75667	0.243333	-4.28895	1.04047e-12	3.30098e-11	Down	Similar to blue copper protein.
Os05g0574300	138.393	52.2767	-1.40454	1.23026e-12	3.87234e-11	Down	Similar to Histone H2B.2.
Os08g0366050	5.22333	1.53667	-1.76517	1.28645e-12	4.01755e-11	Down	Hypothetical protein.
Os04g0578400	12.1533	3.13333	-1.95558	1.34971e-12	4.19869e-11	Down	Similar to Beta-ring hydroxylase (Fragment).
MSTRG.16548	1.74333	0.02	-6.4457	1.3634e-12	4.23716e-11	Down	PREDICTED: myb-related protein P-like [Oryza sativa Japonica Group]
Os06g0714600	17.1467	3.76	-2.18912	1.50376e-12	4.65523e-11	Down	Small G protein Negative regulation of brassinosteroid signaling
Os01g0543100	111.127	28.5833	-1.95896	1.51458e-12	4.67516e-11	Down	Similar to Peroxidase 72 precursor (EC 1.11.1.7) (Atperox P72) (PRXR8) (ATP6a).
Os05g0541400	1.99333	0.0633333	-4.97607	1.91728e-12	5.86716e-11	Down	Atypical bHLH transcription factor Regulation of flowering time
Os11g0258900	30.99	9.4	-1.72107	2.04022e-12	6.21364e-11	Down	Conserved hypothetical protein.
Os02g0541500	6.94667	0.603333	-3.52529	2.10939e-12	6.41205e-11	Down	Similar to predicted protein.
Os03g0798500	9.97667	3.22667	-1.62851	2.12206e-12	6.44445e-11	Down	WRKY transcription factor Positive regulation of defense responses
Os01g0735300	2.48	0.306667	-3.0156	2.20068e-12	6.67054e-11	Down	UDP-glucuronosyl/UDP-glucosyltransferase family protein.
Os02g0614300	8.02	1.28333	-2.64371	2.27797e-12	6.8722e-11	Down	Similar to ANT-like protein.
Os10g0205700	5.13333	0.07	-6.1964	2.4412e-12	7.33693e-11	Down	Pollen Ole e 1 allergen/extensin domain containing protein.
Os10g0459300	18.3733	4.71333	-1.96279	2.48633e-12	7.45153e-11	Down	Exostosin-like family protein.
Os05g0560000	86.8433	11.6467	-2.8985	2.50793e-12	7.50219e-11	Down	Photosystem I reaction center subunit VI chloroplast precursor (PSI- H) (Light-harvesting complex I 11 kDa protein) (GOS5 protein).
Os12g0189400	62.83	7.45333	-3.0755	2.73078e-12	8.11562e-11	Down	Similar to Photosystem I reaction centre subunit N chloroplast precursor (PSI- N).
Os08g0349300	5.49333	0.001	-12.4235	2.76185e-12	8.18512e-11	Down	Conserved hypothetical protein.
Os06g0264800	28.1733	3.61	-2.96426	2.88399e-12	8.53918e-11	Down	Similar to Threonine endopeptidase.
Os07g0558100	15.8567	4.89	-1.69718	3.05499e-12	9.02041e-11	Down	Similar to Myb-related transcription factor LBM1.
Os02g0725000	6.39333	1.8	-1.82857	3.05998e-12	9.0268e-11	Down	Similar to Protein kinase G11A (EC 2.7.1.-) (Fragment).
Os01g0164300	7.72667	0.89	-3.11797	3.19967e-12	9.41282e-11	Down	Pollen Ole e 1 allergen/extensin domain containing protein.
Os04g0653600	12.88	3.06	-2.07353	3.33634e-12	9.79681e-11	Down	Similar to AINTEGUMENTA-like protein.
Os10g0181600	6.27	0.55	-3.51096	3.94541e-12	1.15007e-10	Down	Methyltransferase type 11 domain containing protein.
Os06g0306300	35.3733	5.96	-2.56928	4.11602e-12	1.19762e-10	Down	Haem peroxidase domain containing protein.
Os08g0553800	8.78	2.80667	-1.64536	4.40414e-12	1.2768e-10	Down	NAD(P)-binding domain containing protein.
Os04g0490800	15.34	1.68333	-3.18791	4.5849e-12	1.3268e-10	Down	Haloacid dehalogenase-like hydrolase domain containing protein.
MSTRG.31670	1.89333	0.06	-4.97982	4.66728e-12	1.34698e-10	Down	--
MSTRG.33262	1.64	0.113333	-3.85505	4.78437e-12	1.37952e-10	Down	ankyrin repeat family protein-like [Oryza sativa Japonica Group]
MSTRG.27050	2.36333	0.303333	-2.96185	4.92968e-12	1.41886e-10	Down	--
Os07g0104500	148.913	22.16	-2.74844	4.96232e-12	1.42697e-10	Down	Haem peroxidase plant/fungal/bacterial family protein.
Os03g0828600	1.22	0.0266667	-5.5157	5.59358e-12	1.60255e-10	Down	Similar to ATCHX19 (CATION/H+ EXCHANGER 19)%3B monovalent cation:proton antiporter/ sodium:hydrogen antiporter.
Os02g0763000	80.1367	31.09	-1.36601	5.69017e-12	1.62748e-10	Down	Protein of unknown function Cys-rich family protein.
Os03g0134500	13.2767	2.28	-2.54179	5.71649e-12	1.63209e-10	Down	Cytochrome p450 (CYP78A9).
Os09g0544000	16.9	4.01	-2.07535	6.27952e-12	1.78169e-10	Down	Transferase family protein.
Os01g0281100	31.09	13.59	-1.19391	6.34265e-12	1.798e-10	Down	Conserved hypothetical protein.
Os04g0633900	3.18	0.503333	-2.65944	6.64422e-12	1.87849e-10	Down	Similar to H0315F07.1 protein.
Os08g0374800	43.9033	14.6033	-1.58803	7.00461e-12	1.9734e-10	Down	Similar to UDP-galactose 4-epimerase-like protein.
Os05g0104200	56.6933	13.3467	-2.0867	7.19179e-12	2.02257e-10	Down	Polygalacturonase inhibiting protein Inhibitor of fungal polygalacturonase Sheath blight resistance
Os01g0953100	18.8267	7.98333	-1.23771	7.23063e-12	2.0317e-10	Down	Protein of unknown function DUF594 family protein.
Os06g0567900	32.57	2.89333	-3.49274	8.40679e-12	2.34773e-10	Down	L-ascorbate oxidase Cold salt drought stress response
Os07g0673550	62.0367	4.92	-3.65639	8.92944e-12	2.48934e-10	Down	Photosystem II protein PsbX family protein.
Os02g0714600	184.193	69.8267	-1.39937	8.95308e-12	2.49375e-10	Down	Ribose-phosphate pyrophosphokinase 4 (EC 2.7.6.1) (Phosphoribosyl pyrophosphate synthetase 4).
MSTRG.14242	42.6367	15.7	-1.44133	9.50384e-12	2.64025e-10	Down	--
Os02g0621800	46.2433	17.81	-1.37656	9.72568e-12	2.69953e-10	Down	Glucose-methanol-choline (GMC) oxidoreductase family protein Hybrid breakdown (HB)
Os03g0385100	5.28667	0.47	-3.49163	9.89378e-12	2.74143e-10	Down	Similar to Protease inhibitor/seed storage/LTP family protein expressed.
Os11g0702400	27.58	2.47	-3.48104	1.00743e-11	2.78663e-10	Down	Zinc finger C2H2-type domain containing protein.
Os03g0667300	15.26	2.19667	-2.79637	1.0141e-11	2.80263e-10	Down	Similar to Metal transport protein.
MSTRG.23119	5.29	0.56	-3.23977	1.06294e-11	2.93e-10	Down	PREDICTED: probable WRKY transcription factor 70 isoform X2 [Oryza sativa Japonica Group]
Os12g0157066	4.52333	0.863333	-2.3894	1.08246e-11	2.98124e-10	Down	Hypothetical protein.
Os09g0423400	13.8967	5.07	-1.45468	1.14585e-11	3.14228e-10	Down	Biopterin transport-related protein BT1 family protein.
Os05g0401100	6.56	0.466667	-3.81323	1.21341e-11	3.30769e-10	Down	Protein of unknown function DUF477 family protein.
Os01g0225550	5.37333	0.32	-4.06967	1.21542e-11	3.3081e-10	Down	Hypothetical gene.
Os02g0665800	9.74	2.82667	-1.78482	1.21563e-11	3.3081e-10	Down	UspA domain containing protein.
Os03g0198500	29.6333	10.3633	-1.51573	1.30093e-11	3.53119e-10	Down	Protein of unknown function DUF862 eukaryotic domain containing protein.
Os04g0628200	10.91	3.93	-1.47305	1.37885e-11	3.73953e-10	Down	Similar to H0303G06.9 protein.
Os01g0707500	1.18333	0.0833333	-3.82782	1.40463e-11	3.80297e-10	Down	Similar to Transcription factor LAX PANICLE.
Os06g0288300	14.0467	3.1	-2.17989	1.43249e-11	3.86857e-10	Down	C-glucosyltransferase Flavone-C-glycoside synthesis
Os04g0593400	45.3367	12.0767	-1.90846	1.53772e-11	4.12486e-10	Down	Similar to OSIGBa0142I02-OSIGBa0101B20.20 protein.
Os06g0320500	148.07	18.6467	-2.98929	1.5796e-11	4.23365e-10	Down	Similar to Light-harvesting complex I (Fragment).
Os05g0140100	14.28	2.31667	-2.62387	1.63603e-11	4.37754e-10	Down	R2R3 MYB transcription factor Regulation of phosphate-starvation responses and root architecture
Os09g0471800	8.69	2.95667	-1.55538	1.79789e-11	4.77862e-10	Down	Similar to WAK80 - OsWAK receptor-like protein kinase.
Os05g0279850	3.85667	0.896667	-2.10471	1.80106e-11	4.78305e-10	Down	Hypothetical protein.
MSTRG.28994	2.51667	0.0533333	-5.56033	1.86845e-11	4.95791e-10	Down	--
Os07g0102100	2.41667	0.47	-2.36229	1.88318e-11	4.98699e-10	Down	Similar to Potassium transporter 22.
Os07g0556000	20.0667	4.55333	-2.13981	1.88409e-11	4.98699e-10	Down	Cyclin D domain containing protein.
Os07g0577600	59.9467	7.19667	-3.05828	1.91931e-11	5.0718e-10	Down	Similar to Type II chlorophyll a/b binding protein from photosystem I precursor.
Os12g0257600	3.31667	0.93	-1.83443	1.95036e-11	5.13687e-10	Down	Similar to Laccase-25.
Os06g0292301	7.43	2.74	-1.43919	1.96261e-11	5.16486e-10	Down	Hypothetical gene.
Os12g0609500	6.17	0.99	-2.63977	1.9812e-11	5.20522e-10	Down	Glucose/ribitol dehydrogenase family protein.
Os01g0800900	3.67667	0.363333	-3.33903	2.04412e-11	5.36171e-10	Down	Conserved hypothetical protein.
Os08g0356500	24.33	9.89	-1.29869	2.30063e-11	6.00986e-10	Down	Protein of unknown function DUF247 plant family protein.
Os04g0115200	1.67	0.07	-4.57635	2.36525e-11	6.16858e-10	Down	Conserved hypothetical protein.
Os05g0346800	7.99667	1.00667	-2.98981	2.56382e-11	6.63768e-10	Down	Similar to ASL5%3B DNA binding / protein binding.
Os05g0589500	9.47667	2.18333	-2.11785	2.93261e-11	7.5133e-10	Down	Hypothetical protein.
Os03g0786250	2.26333	0.176667	-3.67935	3.04626e-11	7.78576e-10	Down	Hypothetical gene.
Os08g0366000	32.2467	12.0433	-1.42092	3.1801e-11	8.11484e-10	Down	Phosphoenolpyruvate carboxylase.
Os01g0246400	212.643	60.93	-1.80321	3.58479e-11	9.06067e-10	Down	Similar to Low molecular mass early light-inducible protein HV90 chloroplast precursor (ELIP).
Os05g0349700	21.5867	8.91333	-1.2761	3.62867e-11	9.14986e-10	Down	Chl synthase Chl biosynthesis
Os07g0654300	9.79	3.31667	-1.56157	3.73618e-11	9.4061e-10	Down	Conserved hypothetical protein.
Os10g0416100	131.94	42.0967	-1.6481	3.78956e-11	9.51799e-10	Down	Class III chitinase RCB4 (EC 3.2.1.14).
Os01g0700100	28.3833	7.57	-1.90668	3.80356e-11	9.54565e-10	Down	MtN3 and saliva related transmembrane protein family protein.
MSTRG.8338	2.1	0.253333	-3.05128	3.90496e-11	9.78476e-10	Down	PREDICTED: probable L-type lectin-domain containing receptor kinase VII.2 isoform X1 [Oryza sativa Japonica Group]
Os01g0795100	18.3933	4.57667	-2.00681	3.97557e-11	9.94607e-10	Down	Similar to Subtilase.
Os04g0165200	3.98333	1.54333	-1.36793	4.2353e-11	1.05793e-09	Down	Cys2His2-type zinc finger transcription factor ART1 homolog Al tolerance
MSTRG.31684	2.73333	0.001	-11.4164	4.29379e-11	1.0717e-09	Down	--
Os04g0345800	4.46	0.4	-3.47897	4.30697e-11	1.07415e-09	Down	Similar to OSIGBa0127B24.5 protein.
Os06g0348800	5.23	0.643333	-3.02317	4.41727e-11	1.09994e-09	Down	Transfactor-like protein.
Os03g0279400	100.553	44.4167	-1.17879	4.48266e-11	1.11362e-09	Down	Similar to predicted protein.
Os02g0177700	5.38333	0.993333	-2.43815	4.67153e-11	1.15964e-09	Down	Uncharacterised protein family UPF0497 trans-membrane plant subgroup domain containing protein.
Os05g0519300	18.3367	3.37667	-2.44106	4.88373e-11	1.21138e-09	Down	Protein of unknown function DUF506 plant family protein.
Os08g0203700	13.7167	3.66	-1.90601	5.01262e-11	1.24046e-09	Down	Protein kinase core domain containing protein.
Os02g0224800	55.4267	23.8533	-1.21639	5.07315e-11	1.25447e-09	Down	Ndr family protein.
Os04g0584201	14.66	5.62	-1.38324	5.16221e-11	1.27452e-09	Down	Hypothetical protein.
Os07g0106900	4.00333	0.376667	-3.40984	5.39428e-11	1.32771e-09	Down	Plant disease resistance response protein family protein.
Os09g0455900	25.49	9.04333	-1.495	5.52955e-11	1.35891e-09	Down	Alpha/beta hydrolase fold-3 domain containing protein.
MSTRG.23587	8.65	0.956667	-3.17661	5.54194e-11	1.36091e-09	Down	--
Os04g0674800	5.02333	0.956667	-2.39256	6.20197e-11	1.51484e-09	Down	Similar to CEL1%3DCELLULASE 1 (Fragment).
Os01g0860450	94.9433	31.95	-1.57125	6.33065e-11	1.54391e-09	Down	Hypothetical protein.
MSTRG.27304	5.18667	0.98	-2.40395	6.62467e-11	1.60702e-09	Down	cytochrome P450-like [Oryza sativa Japonica Group]
Os03g0682600	9.10667	0.533333	-4.09381	7.14686e-11	1.72583e-09	Down	Protein argonaute 11.
MSTRG.26057	1.72667	0.193333	-3.15883	7.22037e-11	1.73833e-09	Down	ankyrin repeat protein-like [Oryza sativa Japonica Group]
Os08g0501700	1.20667	0.12	-3.32992	7.44275e-11	1.78783e-09	Down	Conserved hypothetical protein.
Os12g0239300	291.197	106.753	-1.44771	7.46216e-11	1.7899e-09	Down	Conserved hypothetical protein.
Os01g0773700	121.447	16.18	-2.90804	7.72624e-11	1.85036e-09	Down	Similar to Photosystem II reaction center W protein (PSII 6.1 kDa protein) (Fragment).
Os07g0562700	158.933	22.7867	-2.80216	7.83637e-11	1.87392e-09	Down	Similar to Type III chlorophyll a/b-binding protein (Fragment).
Os06g0232300	32.4333	9.35333	-1.79392	8.24169e-11	1.96573e-09	Down	Similar to Auxin transport protein REH1.
Os03g0122300	136.017	47.1767	-1.52764	8.6684e-11	2.06208e-09	Down	Similar to Flavanone 3-hydroxylase-like protein.
Os09g0240200	11.1133	2.19667	-2.3389	8.91146e-11	2.11361e-09	Down	Zinc finger B-box domain containing protein.
MSTRG.10283	2.90333	0.113333	-4.67907	9.15557e-11	2.16829e-09	Down	PREDICTED: transcription factor bHLH139-like isoform X2 [Oryza sativa Japonica Group]
Os04g0320700	203.017	95.55	-1.08727	9.58153e-11	2.26413e-09	Down	Similar to Glucosyltransferase (Fragment).
Os03g0701500	11.1933	3.53333	-1.66354	9.77163e-11	2.30224e-09	Down	GNS1/SUR4 membrane protein family protein.
Os08g0435900	132.38	12.9867	-3.34958	9.84702e-11	2.31659e-09	Down	Similar to LHC I type IV chlorophyll binding protein (Fragment).
Os02g0820800	6.98	1.92	-1.86212	1.00358e-10	2.35926e-09	Down	Predicted AT-hook DNA-binding domain containing protein.
Os08g0200100	29.6567	11.29	-1.39331	1.06635e-10	2.49763e-09	Down	Ribonucleotide reductase-related domain containing protein.
Os01g0951500	16.71	6.50333	-1.36146	1.07419e-10	2.51047e-09	Down	Cytochrome P450 family protein.
Os06g0113900	86.68	37.9167	-1.19287	1.094e-10	2.55305e-09	Down	Major facilitator superfamily general substrate transporter domain containing protein.
Os03g0765900	44.2167	5.83333	-2.9222	1.10142e-10	2.56849e-09	Down	PetM of cytochrome b6/f complex subunit 7 domain containing protein.
Os05g0368100	4.99333	0.42	-3.57154	1.16198e-10	2.70377e-09	Down	Conserved hypothetical protein.
Os09g0437100	2.74667	0.146667	-4.22707	1.25457e-10	2.91075e-09	Down	Similar to SAUR33-auxin-responsive SAUR family member.
Os09g0458100	2.09667	0.37	-2.5025	1.41937e-10	3.27171e-09	Down	Xyloglucan fucosyltransferase family protein.
Os09g0296800	3	0.48	-2.64386	1.42813e-10	3.28717e-09	Down	Chlorophyll A-B binding protein family protein.
Os09g0526200	3.07	0.53	-2.53417	1.44771e-10	3.32505e-09	Down	Similar to Homeobox-leucine zipper protein ROC6.
Os03g0337500	11.9167	4.18667	-1.50911	1.50016e-10	3.44304e-09	Down	Similar to Potassium transporter.
Os01g0332500	2.19	0.316667	-2.78989	1.54705e-10	3.54302e-09	Down	Similar to Serine carboxypeptidase II-like protein.
Os06g0625700	2.43667	0.38	-2.68084	1.61667e-10	3.69187e-09	Down	Glycosyl transferase family 2 domain containing protein.
Os08g0468801	11.2333	3.68	-1.61001	1.63484e-10	3.72274e-09	Down	Hypothetical protein.
MSTRG.8588	7.18333	0.0866667	-6.37303	1.69251e-10	3.84036e-09	Down	--
Os04g0692600	18.82	4.01333	-2.22939	1.73034e-10	3.92341e-09	Down	Staygreen protein domain containing protein.
Os12g0106300	50.48	15.3333	-1.71904	1.75267e-10	3.97124e-09	Down	Xylan acetyltransferase Resistance to bacterial leaf blight disease
Os02g0124650	2.48333	0.18	-3.78621	1.92061e-10	4.32505e-09	Down	Hypothetical protein.
Os11g0302500	7.31	2.71	-1.43158	1.95655e-10	4.40196e-09	Down	Similar to cycloeucalenol cycloisomerase.
Os05g0179300	49.2767	19	-1.37491	2.08904e-10	4.67699e-09	Down	Transferase family protein.
Os07g0556200	40.46	6.41667	-2.6566	2.09765e-10	4.69298e-09	Down	Rieske [2Fe-2S] region domain containing protein.
Os03g0767000	58.64	20.3867	-1.52426	2.10891e-10	4.71157e-09	Down	Allene oxide synthase (CYP74A1) Biosynthesis of jasmonic acid (JA)
Os08g0468100	61.44	15.9633	-1.94442	2.25107e-10	5.02214e-09	Down	Similar to Nitrate reductase.
Os06g0542300	24.6433	7.13333	-1.78855	2.3607e-10	5.25939e-09	Down	Heavy metal transport/detoxification protein domain containing protein.
MSTRG.1514	3.47667	0.106667	-5.02652	2.38818e-10	5.3058e-09	Down	--
Os02g0285800	23.39	5.91667	-1.98304	2.47542e-10	5.48818e-09	Down	Similar to GTP-binding protein typA (Tyrosine phosphorylated protein A).
Os02g0291000	16.23	4.96333	-1.70928	2.52286e-10	5.58949e-09	Down	Calcineurin B (Fragment).
Os10g0340600	0.833333	0.0133333	-5.96578	2.52887e-10	5.59892e-09	Down	Similar to Beta-galactosidase.
Os04g0597300	6.85	1.51	-2.18156	2.53524e-10	5.60912e-09	Down	Similar to WERKY protein (Fragment).
Os09g0508900	4.58667	0.603333	-2.92642	2.55766e-10	5.65483e-09	Down	Similar to cDNA clone:001-044-E12 full insert sequence.
Os03g0176700	29.8967	10.5133	-1.50776	2.56057e-10	5.65734e-09	Down	Conserved hypothetical protein.
Os12g0431700	17.38	2.85	-2.60839	2.61494e-10	5.76947e-09	Down	Hypothetical conserved gene.
Os01g0831900	2.31667	0.07	-5.04855	2.63434e-10	5.80828e-09	Down	Similar to Ammonium transporter.
Os05g0231100	17.96	2.32	-2.95259	2.69742e-10	5.93098e-09	Down	Hypothetical conserved gene.
Os08g0504800	11.37	2.96667	-1.93832	2.71801e-10	5.96804e-09	Down	Similar to protein kinase.
Os11g0707000	147.973	16.9867	-3.12286	2.73079e-10	5.99198e-09	Down	Similar to Ribulose bisphosphate carboxylase/oxygenase activase chloroplastic.
Os05g0531200	38.3867	11.52	-1.73646	2.81175e-10	6.14851e-09	Down	Pollen Ole e 1 allergen and extensin domain containing protein.
Os06g0705100	4.7	0.58	-3.01854	2.87848e-10	6.28153e-09	Down	Similar to Thylakoid lumenal 13.3 kDa protein (P16.5) (Fragment).
Os10g0334500	2.55333	0.001	-11.3182	2.98496e-10	6.4829e-09	Down	Similar to Dirigent-like protein expressed.
MSTRG.33083	1.18	0.001	-10.2046	3.07723e-10	6.67876e-09	Down	--
Os12g0470700	1.38667	0.0766667	-4.17688	3.17939e-10	6.88645e-09	Down	ATPase AAA-type core domain containing protein.
Os11g0432600	1.65	0.03	-5.78136	3.26894e-10	7.06126e-09	Down	Similar to Beta-keto acyl reductase (Fragment).
Os06g0474500	5.73	1.26667	-2.1775	3.3322e-10	7.18334e-09	Down	Protein of unknown function DUF239 plant domain containing protein.
Os05g0156500	66.6567	28.9133	-1.20501	3.34254e-10	7.19537e-09	Down	Similar to Apobec-1 binding protein 2.
Os04g0452600	38.04	9.10667	-2.06252	3.34454e-10	7.19537e-09	Down	Similar to H0505F09.2 protein.
Os07g0232900	16.0833	6.92	-1.21672	3.46749e-10	7.44484e-09	Down	Heavy metal-transporting P1B-ATPase Root-to-shoot cadmium (Cd) translocation
Os03g0364500	13.64	3.28333	-2.05461	3.52642e-10	7.5663e-09	Down	Similar to plectin-related.
Os07g0152900	23.77	5.57333	-2.09253	3.78139e-10	8.05386e-09	Down	Similar to Glycolate oxidase (EC 1.1.3.15) (Fragment).
Os10g0536100	44.27	14.7533	-1.58529	3.81252e-10	8.11475e-09	Down	MIKC-type MADS-box protein Long day (LD)-specific negative regulator of flowering
Os04g0494950	2.59667	0.246667	-3.39603	3.92435e-10	8.34722e-09	Down	Similar to OSIGBa0103O01.12 protein.
Os05g0579500	15.1133	4.75667	-1.6678	3.9888e-10	8.46176e-09	Down	Similar to 10A19I.7.
Os10g0491450	15.7333	2.74333	-2.51982	4.18451e-10	8.81839e-09	Down	Conserved hypothetical protein.
Os01g0938100	29.3367	4.69333	-2.64402	4.25379e-10	8.94668e-09	Down	Photosystem II protein Psb28 class 1 domain containing protein.
Os11g0600500	6.66333	0.26	-4.67966	4.28165e-10	8.99936e-09	Down	Calcium-binding EF-hand domain containing protein.
Os03g0137600	35.5733	9.32333	-1.93188	4.29047e-10	9.00604e-09	Down	Conserved hypothetical protein.
Os07g0561500	3.46667	0.453333	-2.9349	4.32656e-10	9.07583e-09	Down	Short-chain dehydrogenase/reductase SDR domain containing protein.
Os02g0277700	1.69667	0.39	-2.12116	4.49077e-10	9.39562e-09	Down	Leucine-rich repeat domain containing protein.
Os03g0778100	40.6933	4.75667	-3.09677	4.70579e-10	9.82618e-09	Down	Similar to Photosystem-1 F subunit.
Os06g0692600	2.97667	0.67	-2.15146	4.76785e-10	9.94926e-09	Down	Protein kinase core domain containing protein.
Os02g0575500	18.7867	4.55667	-2.04366	4.81966e-10	1.00377e-08	Down	Similar to ABC transporter-like.
Os01g0866200	136.41	63.7867	-1.09662	4.94742e-10	1.02904e-08	Down	Similar to Histone H3.
Os10g0491400	20.36	6.42	-1.66509	5.06736e-10	1.05193e-08	Down	Conserved hypothetical protein.
Os01g0648000	33.4967	11.91	-1.49184	5.11721e-10	1.06159e-08	Down	Potassium channel Potassium uptake Salt stress tolerance
Os11g0459600	5.04333	0.736667	-2.77529	5.22627e-10	1.08237e-08	Down	Conserved hypothetical protein.
Os10g0504200	32.9333	14.1267	-1.22113	5.22755e-10	1.08237e-08	Down	Cytochrome b561 family protein.
Os07g0180300	3.29333	1.1	-1.58205	5.31237e-10	1.0978e-08	Down	Protein of unknown function DUF594 family protein.
Os07g0251900	0.62	0.06	-3.36923	5.39852e-10	1.11416e-08	Down	Leucine-rich repeat N-terminal domain containing protein.
Os01g0805000	15.4867	3.86333	-2.00311	5.46533e-10	1.12649e-08	Down	50S ribosomal protein L34.
Os03g0267300	16.4633	2.20667	-2.89932	5.55346e-10	1.14392e-08	Down	Similar to Fructose-1 6-bisphosphatase chloroplast precursor (EC 3.1.3.11) (D- fructose-1 6-bisphosphate 1-phosphohydrolase) (FBPase).
Os08g0200300	77.9967	9.32333	-3.06449	5.80827e-10	1.19486e-08	Down	Similar to Photosystem II 10 kDa polypeptide (Fragment).
Os10g0335000	2.84667	0.02	-7.15313	5.96753e-10	1.22369e-08	Down	Dirigent protein Lignin biosynthesis
Os01g0832600	0.966667	0.001	-9.91687	6.54119e-10	1.33362e-08	Down	Similar to Leucoanthocyanidin dioxygenase-like protein.
Os12g0584200	6.87333	1.2	-2.51798	6.593e-10	1.34247e-08	Down	Similar to cDNA clone:J013075O22 full insert sequence.
Os02g0153400	1.13333	0.14	-3.01707	6.68217e-10	1.35976e-08	Down	Leucine-rich repeat receptor-like kinase
MSTRG.894	1.15333	0.001	-10.1716	6.83583e-10	1.38833e-08	Down	PREDICTED: ervatamin-B [Oryza sativa Japonica Group]
Os07g0638600	2.74667	0.223333	-3.62041	6.86183e-10	1.39188e-08	Down	Similar to Class III peroxidase 44.
Os05g0466600	136.34	63.83	-1.0949	7.20681e-10	1.45816e-08	Down	Similar to Histone H4.
Os01g0549000	2.31	0.266667	-3.11478	7.80242e-10	1.57567e-08	Down	Similar to Polygalacturonase (Fragment).
Os12g0203200	296.95	83.0233	-1.83863	7.83047e-10	1.57934e-08	Down	Conserved hypothetical protein.
Os05g0507300	63.7533	31.1367	-1.03389	8.55283e-10	1.71529e-08	Down	Similar to Calreticulin-3.
Os02g0532900	9.02	2.50333	-1.84928	9.13048e-10	1.82427e-08	Down	Glycoside hydrolase family 17 protein.
Os01g0248900	28.9733	5.76333	-2.32975	9.49178e-10	1.88819e-08	Down	Alpha-expansin Mediation of the cell extension and growth Root system architecture
Os01g0804400	22.1833	8.31667	-1.4154	9.7218e-10	1.92914e-08	Down	Cytochrome P450 family protein.
Os03g0592500	405.2	45.8767	-3.1428	9.92151e-10	1.96511e-08	Down	Similar to Photosystem II type II chlorophyll a/b binding protein (Fragment).
Os05g0129800	1.51667	0.0533333	-4.82972	1.00824e-09	1.99574e-08	Down	DNA-binding WRKY domain containing protein.
Os06g0287700	14.0267	3.13333	-2.1624	1.0225e-09	2.02147e-08	Down	Similar to NBS-LRR disease resistance protein homologue (Fragment).
Os01g0866400	19.5333	1.86333	-3.38998	1.07819e-09	2.11715e-08	Down	Similar to Fructose-1 6-bisphosphatase (EC 3.1.3.11) (Fragment).
Os05g0166300	6.73	2.6	-1.37209	1.13648e-09	2.22069e-08	Down	Serine/threonine protein kinase-related domain containing protein.
Os05g0279900	7.7	2.25333	-1.7728	1.18961e-09	2.31882e-08	Down	Similar to glycoside hydrolase family 28 protein / polygalacturonase (pectinase) family protein.
Os03g0120900	4.90333	1.17667	-2.05906	1.24107e-09	2.41178e-08	Down	Similar to AP2 domain containing protein RAP2.8 (Fragment).
Os01g0842400	8.63333	2.85333	-1.59727	1.24282e-09	2.41371e-08	Down	Similar to Laccase (EC 1.10.3.2).
Os06g0184500	3.45333	1.01	-1.77363	1.27881e-09	2.4806e-08	Down	BTB domain containing protein.
Os05g0200400	35.25	14.7033	-1.26148	1.31125e-09	2.54043e-08	Down	Similar to Cytochrome P450 CYP90D10.b.
Os11g0156600	45.0633	10.1967	-2.14386	1.33559e-09	2.5829e-08	Down	Similar to H0622F05.7 protein.
Os08g0119800	7.16	1.05	-2.76957	1.3689e-09	2.64411e-08	Down	Similar to Photosystem II core complex proteins psbY chloroplast precursor (L- arginine metabolising enzyme) (L-AME) [Contains: Photosystem II protein psbY-1 (psbY-A1)%3B Photosystem II protein psbY-2 (psbY-A2)].
Os06g0608700	18.15	3.05667	-2.56994	1.44755e-09	2.78593e-08	Down	Similar to Fructose-bisphosphate aldolase cytoplasmic isozyme (EC 4.1.2.13).
Os03g0689100	5.92333	1.7	-1.80087	1.48581e-09	2.85269e-08	Down	Histidine acid phosphatase family protein.
Os07g0544800	36.2167	5.1	-2.82808	1.48945e-09	2.85795e-08	Down	Similar to Oxygen-evolving enhancer protein 3-2 chloroplast precursor (OEE3) (16 kDa subunit of oxygen evolving system of photosystem II) (OEC 16 kDa subunit) (Ferredoxin-NADP reductase binding protein) (BP).
Os01g0735500	6.39667	2.07	-1.62769	1.49734e-09	2.86965e-08	Down	Conserved hypothetical protein.
Os02g0756100	1.84333	0.173333	-3.4107	1.50652e-09	2.88205e-08	Down	Conserved hypothetical protein.
Os11g0109500	14.46	6.87	-1.07369	1.52336e-09	2.90922e-08	Down	Staphylococcal nuclease (SNase-like) OB-fold domain containing protein.
Os05g0158500	22.6067	8.63333	-1.38876	1.62846e-09	3.10048e-08	Down	Serine carboxypeptidase Positive regulator of grain size
Os05g0589400	11.4867	2.65333	-2.11408	1.65493e-09	3.14713e-08	Down	Similar to I-box binding factor (Fragment).
Os03g0130100	7.58	1.32667	-2.51439	1.65827e-09	3.1516e-08	Down	Similar to Acyl-activating enzyme 11.
Os03g0596600	6.33333	1.93333	-1.71187	1.70478e-09	3.23038e-08	Down	Zinc finger CCHC-type domain containing protein.
Os01g0921100	10.87	2.32667	-2.22402	1.73541e-09	3.28065e-08	Down	Hypothetical conserved gene.
Os03g0556600	3.10333	0.836667	-1.89109	1.78422e-09	3.36496e-08	Down	Serine/threonine protein kinase-related domain containing protein.
Os09g0459200	5.92333	1.55	-1.93414	1.79653e-09	3.38418e-08	Down	Unknown product Brassinosteroid signaling Control of organ length
Os08g0130900	6.86333	2.48	-1.46857	1.80228e-09	3.393e-08	Down	Similar to galactosyltransferase family.
Os09g0279400	3.66	0.383333	-3.25517	1.82354e-09	3.43101e-08	Down	Rhodanese-like domain containing protein.
Os06g0158400	2.81667	0.963333	-1.54788	1.9073e-09	3.57423e-08	Down	Hypothetical conserved gene.
Os01g0191200	23.25	5.82	-1.99814	1.90749e-09	3.57423e-08	Down	Similar to Acid phosphatase.
Os12g0249900	14.69	5.87	-1.3234	1.92813e-09	3.61077e-08	Down	Protein kinase core domain containing protein.
Os06g0107700	12.8867	1.78667	-2.85054	1.94193e-09	3.63449e-08	Down	Leaf-type ferredoxin-NADP+-oxidoreductase Regulation of electron partitioning in the chloroplast
Os03g0121700	33.1533	13.1667	-1.33226	1.96728e-09	3.67979e-08	Down	Similar to Nascent polypeptide-associated complex alpha subunit-like protein 3 (NAC-alpha-like protein 3) (Alpha-NAC-like protein 3).
Os03g0247200	20.6267	3.64	-2.5025	1.96958e-09	3.68011e-08	Down	Conserved hypothetical protein.
Os04g0300600	6.98333	1.15667	-2.59394	1.9891e-09	3.70758e-08	Down	Hypothetical conserved gene.
Os01g0263300	189.227	73.92	-1.35608	2.00277e-09	3.72871e-08	Down	Similar to Peroxidase 72 precursor (EC 1.11.1.7) (Atperox P72) (PRXR8) (ATP6a).
Os04g0304200	15.5933	4.23333	-1.88106	2.10206e-09	3.88863e-08	Down	Similar to Nonphototropic hypocotyl protein 1 (EC 2.7.1.37) (Phototropin).
Os07g0251200	30.7867	8.51667	-1.85394	2.10783e-09	3.89704e-08	Down	Conserved hypothetical protein.
Os04g0457000	77.72	8.43333	-3.20411	2.17075e-09	4.01106e-08	Down	Similar to Chlorophyll a/b-binding protein CP24 photosystem II (Fragment).
Os05g0105100	62.8133	25.21	-1.31707	2.26409e-09	4.16665e-08	Down	Similar to Small GTPase rab11-related.
Os09g0551600	154.167	67.62	-1.18897	2.3395e-09	4.28568e-08	Down	Similar to HMGd1 protein (Nucleasome/chromatin assembly factor D protein NFD101).
Os04g0644100	2.88	0.17	-4.08246	2.36717e-09	4.32893e-08	Down	Sterile alpha motif homology domain containing protein.
Os02g0818000	15.8733	2.85	-2.47757	2.39168e-09	4.37125e-08	Down	Similar to Brown planthopper-induced resistance protein 1.
Os03g0245500	60.12	11.5133	-2.38454	2.55037e-09	4.62424e-08	Down	Curculin-like (mannose-binding) lectin domain containing protein.
Os01g0555600	9.3	2.96	-1.65163	2.66552e-09	4.82481e-08	Down	Dynein light chain type 1 family protein.
Os10g0330400	19.9467	5.61333	-1.82922	2.70295e-09	4.88704e-08	Down	Protein of unknown function DUF179 family protein.
Os04g0507100	2.60333	0.54	-2.26933	2.77026e-09	4.99993e-08	Down	Conserved hypothetical protein.
Os01g0853700	13.02	4.47333	-1.54131	2.77165e-09	4.99993e-08	Down	Similar to MCB1 protein.
Os06g0162550	1.15	0.0433333	-4.73001	2.78609e-09	5.02267e-08	Down	Carotenoid oxygenase domain containing protein.
Os05g0496200	33.7767	9.45333	-1.83713	2.7874e-09	5.02267e-08	Down	Similar to 3-phosphoglycerate kinase (Fragment).
Os03g0314750	6.09667	0.84	-2.85956	2.93881e-09	5.28655e-08	Down	Hypothetical conserved gene.
Os02g0557200	45.1567	20.31	-1.15275	2.94958e-09	5.30294e-08	Down	Similar to Auxin response factor 1.
Os08g0167000	40.63	14.7433	-1.46248	2.96108e-09	5.32061e-08	Down	ABC transporter-like domain containing protein.
Os05g0122600	10.2533	3.54667	-1.53156	2.97216e-09	5.33453e-08	Down	Prefoldin domain containing protein.
Os01g0869800	180.987	25.3333	-2.83677	3.07148e-09	5.48813e-08	Down	22-kDa Photosystem II protein Photoprotection
Os01g0953000	5.06667	0.96	-2.39993	3.07948e-09	5.49934e-08	Down	Hypothetical protein.
Os07g0631500	13.44	5.16	-1.38109	3.09327e-09	5.52088e-08	Down	Similar to Mov34/MPN/PAD-1 family protein.
Os10g0137300	772.563	200.903	-1.94315	3.25184e-09	5.79096e-08	Down	Similar to BLN1-1.
Os01g0235100	6.41667	0.933333	-2.78136	3.32644e-09	5.9151e-08	Down	Similar to predicted protein.
Os12g0157000	6.44667	1.56667	-2.04086	3.34133e-09	5.93708e-08	Down	DNA-binding pseudobarrel domain domain containing protein.
Os08g0121900	29.55	11.56	-1.35402	3.34685e-09	5.94359e-08	Down	Protein of unknown function DUF23 family protein.
Os01g0510600	4.83333	1.37	-1.81884	3.3873e-09	6.00874e-08	Down	Tetratricopeptide-like helical domain containing protein.
Os04g0412100	10.49	3.21	-1.70837	3.40193e-09	6.03135e-08	Down	Similar to H0717B12.8 protein.
Os03g0210700	15.12	6.17667	-1.29156	3.62322e-09	6.39174e-08	Down	Conserved hypothetical protein.
Os01g0183950	15.6633	2.45	-2.67654	3.66191e-09	6.44984e-08	Down	Hypothetical protein.
Os01g0551100	23.9433	10.2967	-1.21745	3.81345e-09	6.68673e-08	Down	Ribonuclease III domain containing protein.
Os09g0110100	14.37	2.67	-2.42815	3.84342e-09	6.73188e-08	Down	Protein kinase core domain containing protein.
Os01g0349600	4.66	0.986667	-2.2397	3.86427e-09	6.76469e-08	Down	Hypothetical protein.
Os05g0127200	99.0967	37.55	-1.40002	3.94173e-09	6.89275e-08	Down	Similar to Phospholipase C (Fragment).
Os08g0239300	67.5367	10.3467	-2.7065	3.96604e-09	6.93145e-08	Down	Dienelactone hydrolase domain containing protein.
Os01g0522400	20.76	6.78667	-1.61303	4.08115e-09	7.11706e-08	Down	Armadillo-like helical domain containing protein.
Os12g0575000	25.2233	4.50667	-2.48463	4.21919e-09	7.34964e-08	Down	Protein of unknown function DUF1118 family protein.
Os07g0501800	4.50333	1.12	-2.00749	4.22142e-09	7.34964e-08	Down	Similar to Receptor-like protein kinase.
Os06g0696600	93.6233	26.4	-1.82633	4.40059e-09	7.64493e-08	Down	Similar to Xyloglucan endo-transglycosylase homolog.
Os08g0125300	1.41	0.166667	-3.08066	4.60266e-09	7.98729e-08	Down	Integrase catalytic core domain containing protein.
Os04g0497700	38.24	10.2733	-1.89618	4.76062e-09	8.25244e-08	Down	Similar to CONSTANS-like protein.
Os01g0507000	40.2667	15.5967	-1.36835	4.76525e-09	8.25597e-08	Down	Non-protein coding transcript.
[truncated: 2,344 more rows]
