# Supplementary material for: Local and Systemic Response to Heterogeneous Sulfate Resupply after Sulfur Deficiency in Rice
Source: Int J Mol Sci. 2022 May 31;23(11):6203. doi: 10.3390/ijms23116203 (PMC9181796; doi:10.3390/ijms23116203)
Supplement: Supplementary file 1 [file ijms-23-06203-s001.zip › Table S5.xlsx]

## Sheet: Percentage of each Gene set
Table S5. Percentage of local responese genes, systemic response genes, simultaneous local and systemic response genes, and non response genes to sulfate resupply after S deficiency.
Gene set	Expression pattern under S deficiency	Gene mode	Gene number	Total expression recovered gene number	Percentage
A	Up-regulated	Local response	128	413	0.309927
B	Up-regulated	Systemic response	8	413	0.0193705
C	Up-regulated	Simultaneous local and systemic response	105	413	0.254237
D	Up-regulated	No response	172	413	0.416465
E	Down-regulated	Local response	28	1164	0.024055
F	Down-regulated	Systemic response	7	1164	0.00601375
G	Down-regulated	Simultaneous local and systemic response	85	1164	0.0730241
H	Down-regulated	No response	1044	1164	0.896907

## Sheet: Gene set A
Table S5. Root up-regulated DEGs that locally responded to sulfate resupply
Gene ID	CK_R_ mean FPKM	S0_R_ mean FPKM	SR_R_ mean FPKM	SPSR_R_ mean FPKM	SPS0_R_ mean FPKM	Log2 (S0/CK)	Up/Down (S0/CK)	P_Value (S0/CK)	FDR (S0/CK)	Log2 (SR/S0)	Up/Down (SR/S0)	P_Value (SR/S0)	FDR (SR/S0)	Log2 (SPSR/S0)	Up/Down (SPSR/S0)	P_Value (SPSR/S0)	FDR (SPSR/S0)	Log2 (SPS0/S0)	Up/Down (SPS0/S0)	P_Value (SPS0/S0)	FDR (SPS0/S0)	Annotation
Os09g0452700	1.4	4559.73	1081.78	1020.67	2676.51	11.6693	Up	1.65e-160	4.79e-157	-2.07555	Down	1.85e-11	1.77e-09	-2.15943	Down	2.79e-16	3.79e-14	-0.768594	--	0.00246371	0.0202398	Ubiquitin.
Os07g0625500	0.07	99.8167	32.29	24.8733	63.9967	10.4777	Up	3.13e-14	1.23e-12	-1.62819	Down	0.000796639	0.00861006	-2.00468	Down	8.82e-11	5.15e-09	-0.641284	--	0.0309992	0.138422	Similar to Fimbriata-associated protein (Fragment).
Os04g0204100	0.21	289.417	84.49	53.1867	236.94	10.4285	Up	1.86e-172	1.19e-168	-1.7763	Down	9.68e-10	6.93e-08	-2.44401	Down	3.6e-27	1.32e-24	-0.288626	--	0.221794	0.497533	Similar to H0825G02.3 protein.
Os07g0625600	0.173333	222.827	62.6	64.79	133.377	10.3282	Up	4.56e-94	4.55e-91	-1.83169	Down	2.78e-07	1.04e-05	-1.78208	Down	2.46e-13	2.26e-11	-0.740416	--	0.00221676	0.0185646	Fimbriata-associated protein (Fragment).
MSTRG.4680	0.0333333	32.06	7.24667	2.31333	18.0267	9.90959	Up	2.77e-21	2.21e-19	-2.14538	Down	0.00155233	0.0146042	-3.79273	Down	3.41e-23	9.12e-21	-0.830642	--	0.0599117	0.21831	--
Os04g0206600	0.316667	271.393	77.9667	121.543	322.443	9.7432	Up	1.49e-98	1.59e-95	-1.79946	Down	1.49e-20	4.48e-18	-1.15891	Down	3.41e-06	7.15e-05	0.24866	--	0.304269	0.592476	UDP-glucuronosyl/UDP-glucosyltransferase family protein.
Os03g0259500	1.45333	1118.35	369.613	269.78	771.757	9.58779	Up	5.69e-106	6.49e-103	-1.59728	Down	1.17e-05	0.000266253	-2.05152	Down	4.84e-14	5e-12	-0.535154	--	0.0478759	0.18828	Similar to Ubiquitin.
Os04g0627900	1.01	682.813	243.353	270.82	627.907	9.40099	Up	5.68e-194	6.05e-190	-1.48844	Down	3.42e-08	1.62e-06	-1.33416	Down	1.67e-05	0.000284293	-0.120941	--	0.497634	0.757424	Translation initiation factor SUI1 domain containing protein.
Os10g0506200	0.206667	89.3367	33.7167	42.69	92.2833	8.7558	Up	2.13e-302	6.8e-298	-1.40579	Down	3.5e-08	1.66e-06	-1.06535	Down	1.7e-06	3.86e-05	0.0468177	--	0.977245	0.991728	Similar to Valyl-tRNA synthetase.
Os10g0386300	0.45	190.263	40.6933	28.0733	105.25	8.72386	Up	2.85e-116	3.96e-113	-2.22513	Down	9.38e-07	3.03e-05	-2.76073	Down	5.44e-08	1.82e-06	-0.854177	--	0.0606729	0.220039	Hypothetical protein.
Os04g0204150	0.326667	135.527	48.95	31.18	112.887	8.69654	Up	1.49e-179	1.19e-175	-1.4692	Down	3.2e-07	1.17e-05	-2.11988	Down	9.93e-24	2.76e-21	-0.263702	--	0.137959	0.373854	Hypothetical protein.
Os02g0179600	2.87667	781.977	249.5	235.517	642.927	8.08658	Up	4.54e-168	1.81e-164	-1.64809	Down	2.15e-06	6.25e-05	-1.7313	Down	2.77e-08	9.92e-07	-0.282471	--	0.25372	0.535811	Uncharacterized conserved protein UCP015417 vWA domain containing protein.
Os04g0206500	0.613333	145.153	32.1833	27.57	80.0933	7.88669	Up	1.29e-142	3.17e-139	-2.17319	Down	1.72e-10	1.41e-08	-2.39641	Down	7.13e-28	2.87e-25	-0.857824	--	3.57e-05	0.000593845	UDP-glucuronosyl/UDP-glucosyltransferase family protein.
Os09g0324300	0.293333	59.54	13.2133	10.1767	53.98	7.66517	Up	2.91e-106	3.44e-103	-2.17186	Down	5.3e-09	3.11e-07	-2.54859	Down	2.68e-19	5.13e-17	-0.141434	--	0.526516	0.777062	Cyclin-like F-box domain containing protein.
Os02g0183900	0.25	39.1633	11.31	16.7	36.7433	7.29143	Up	6.76e-97	6.96e-94	-1.7919	Down	2.64e-09	1.68e-07	-1.22966	Down	2.52e-06	5.49e-05	-0.0920211	--	0.681351	0.869587	Similar to Isoleucine-tRNA ligase-like protein.
Os09g0344400	0.89	132.243	48.2167	43.5233	129.363	7.21517	Up	1.03e-168	4.68e-165	-1.45559	Down	8.06e-07	2.65e-05	-1.60333	Down	5e-12	3.59e-10	-0.0317662	--	0.71692	0.886398	F-box domain cyclin-like domain containing protein.
Os01g0280500	1.77	260.817	66.5567	42.4167	180.183	7.20314	Up	5.43e-140	1.24e-136	-1.97038	Down	4.37e-09	2.63e-07	-2.62033	Down	3.34e-22	8.32e-20	-0.53357	--	0.11647	0.335362	Similar to Eukaryotic translation initiation factor 6 (eIF-6) (B4 integrin interactor) (CAB) (p27(BBP)) (B(2)GCN homolog).
Os12g0191601	2.15	284.97	99.9467	134.21	412.21	7.05033	Up	2.07e-118	3.14e-115	-1.51158	Down	4.26e-12	4.48e-10	-1.08632	Down	6.63e-07	1.71e-05	0.532569	--	0.1225	0.346351	Conserved hypothetical protein.
Os01g0510200	26.8233	3438.12	1278.06	1505.46	3225.18	7.00199	Up	7.92e-88	6.84e-85	-1.42766	Down	2.05e-08	1.04e-06	-1.19142	Down	1.15e-05	0.000207179	-0.0922402	--	0.52324	0.775107	Conserved hypothetical protein.
Os09g0342000	0.74	91.5267	32.03	28.97	85.1333	6.95052	Up	1.11e-117	1.61e-114	-1.51477	Down	2.7e-10	2.14e-08	-1.65963	Down	4.18e-09	1.78e-07	-0.104468	--	0.488121	0.749983	Cyclin-like F-box domain containing protein.
Os09g0499400	0.153333	15.3333	6.07	6.07	13.8867	6.64386	Up	1.38e-61	7.13e-59	-1.3369	Down	0.000863119	0.00923696	-1.3369	Down	0.000207207	0.0023755	-0.142971	--	0.551474	0.793487	Domain of unknown function DUF2828 domain containing protein.
Os04g0206450	0.23	15.3633	4.84	3.88	11.6933	6.06171	Up	5.36e-52	2.22e-49	-1.66641	Down	1.53e-06	4.65e-05	-1.98536	Down	2.73e-17	4.14e-15	-0.393805	--	0.0257366	0.120931	Similar to cDNA clone:002-100-D12 full insert sequence.
Os10g0343951	0.293333	18.2733	5.95333	4.28	15.91	5.96105	Up	1.63e-45	5.16e-43	-1.61797	Down	6.17e-08	2.76e-06	-2.09406	Down	7.3e-15	8.59e-13	-0.199806	--	0.544296	0.788961	Hypothetical conserved gene.
Os07g0605800	5.04667	313.563	125.897	109.727	392.287	5.95728	Up	4.33e-69	2.61e-66	-1.31652	Down	0.000301529	0.00396044	-1.51484	Down	6.12e-05	0.000865426	0.323151	--	0.472905	0.738851	Similar to STF-1 (Fragment).
Os12g0150700	0.79	48.0633	18.4933	13.8333	54.8133	5.92694	Up	1.36e-131	2.56e-128	-1.37793	Down	5.54e-06	0.000141461	-1.79679	Down	1.68e-07	4.99e-06	0.18959	--	0.724446	0.889343	Similar to Ser/Thr protein phosphatase family protein expressed.
Os10g0344000	2.23333	122.773	48.4133	28.4933	95.9033	5.78065	Up	1.55e-84	1.31e-81	-1.34252	Down	6.63e-06	0.000164229	-2.1073	Down	7.43e-15	8.67e-13	-0.356344	--	0.270003	0.555393	Similar to transparent testa 12 protein.
Os06g0697500	4.19667	221.577	86.3167	46.0633	158.397	5.72242	Up	9.28e-43	2.67e-40	-1.36009	Down	0.00177743	0.0162895	-2.26612	Down	2.31e-06	5.08e-05	-0.484264	--	0.273153	0.558877	ATPase AAA-type core domain containing protein.
Os09g0324400	4.25	217.39	36.8233	22.0867	132.05	5.67668	Up	9e-131	1.6e-127	-2.56159	Down	1.13e-09	7.96e-08	-3.29904	Down	2.59e-36	1.96e-33	-0.719201	--	0.0250181	0.118235	Cyclin-like F-box domain containing protein.
Os01g0959750	6.8	244.547	90.0333	114.02	292.847	5.16843	Up	9.89e-116	1.32e-112	-1.44158	Down	3.95e-10	3.02e-08	-1.10082	Down	2.34e-10	1.27e-08	0.260036	--	0.309653	0.598018	Conserved hypothetical protein.
MSTRG.21464	0.236667	7.02667	1.17667	2.19333	8.60333	4.89191	Up	2.15e-25	2.35e-23	-2.57813	Down	9.55e-17	1.97e-14	-1.67972	Down	1.58e-08	5.98e-07	0.292055	--	0.544963	0.789359	--
Os08g0272800	0.133333	3.9	1.53667	1.79667	3.56333	4.87036	Up	7.97e-13	2.58e-11	-1.34367	Down	0.00258051	0.0217854	-1.11815	Down	0.00593085	0.0352603	-0.130247	--	0.666657	0.861962	Hypothetical gene.
Os03g0724600	1.63667	47.7433	16.7933	17.2567	34.27	4.86647	Up	1.09e-61	5.7e-59	-1.50741	Down	1.29e-06	4.02e-05	-1.46815	Down	1.07e-06	2.6e-05	-0.478353	--	0.0193564	0.0980286	Conserved hypothetical protein.
Os05g0588900	2.91333	66.1067	18.5367	22.6133	60.8933	4.50405	Up	7.84e-74	5.22e-71	-1.83441	Down	6.5e-23	2.69e-20	-1.54762	Down	1.82e-09	8.44e-08	-0.118511	--	0.382197	0.668557	Similar to mitochondrial chaperone BCS1.
Os05g0473300	0.353333	7.57	2.58	2.18667	4.94333	4.42119	Up	1.09e-32	2.01e-30	-1.55292	Down	1.49e-05	0.000327068	-1.79156	Down	1.19e-07	3.7e-06	-0.614809	--	0.0438553	0.176679	Hypothetical conserved gene.
MSTRG.1642	0.17	3.42667	1.35	0.966667	2.95333	4.3332	Up	5.13e-21	4e-19	-1.34385	Down	4.07e-05	0.000752026	-1.82572	Down	8.14e-07	2.05e-05	-0.214462	--	0.429602	0.707045	--
Os04g0373400	24.5667	489.007	155.87	164.977	394.237	4.31508	Up	1.2e-132	2.4e-129	-1.64951	Down	9.92e-15	1.54e-12	-1.56759	Down	1.78e-36	1.38e-33	-0.310792	--	0.0176283	0.0917368	Similar to MATE efflux family protein expressed.
Os11g0210201	10.9233	202.917	99.4533	74.5	220.697	4.2154	Up	3.85e-60	1.86e-57	-1.0288	Down	7.14e-07	2.38e-05	-1.44558	Down	2.72e-17	4.14e-15	0.121177	--	0.780797	0.91659	Conserved hypothetical protein.
Os12g0614851	0.62	11.0567	2.84667	2.56667	11.2433	4.1565	Up	8.91e-43	2.59e-40	-1.95757	Down	3.77e-09	2.31e-07	-2.10695	Down	4.36e-13	3.84e-11	0.0241533	--	0.926154	0.974926	Serine/threonine protein kinase domain containing protein.
Os11g0135900	3.22333	55.9933	13.8233	17.1333	34.57	4.11863	Up	4.1e-125	6.9e-122	-2.01815	Down	5.32e-13	6.36e-11	-1.70845	Down	8.33e-16	1.07e-13	-0.695734	--	2.3e-05	0.000408861	Major facilitator superfamily protein.
Os01g0155000	31.5033	460.613	218.987	184.36	427.303	3.86998	Up	2.45e-36	5.4e-34	-1.07271	Down	6.77e-05	0.00116334	-1.32103	Down	2e-05	0.000331544	-0.108296	--	0.565327	0.8011	Alpha/beta hydrolase fold-3 domain containing protein.
Os04g0588500	4.33	56.6133	16.1733	12.49	30.89	3.7087	Up	4.4e-112	5.62e-109	-1.80752	Down	4.55e-07	1.61e-05	-2.18037	Down	2.87e-09	1.28e-07	-0.874002	--	0.00329762	0.0254466	Hypothetical gene.
Os05g0544600	0.533333	6.73667	1.32333	2.09667	4.77667	3.65893	Up	3.65e-37	8.21e-35	-2.34786	Down	2.47e-16	4.82e-14	-1.68394	Down	3.17e-06	6.7e-05	-0.496031	--	0.024659	0.117087	Hypothetical conserved gene.
Os03g0145600	0.77	9.44	4.13667	3.11	7.17667	3.61586	Up	5.07e-34	1.02e-31	-1.19032	Down	2.68e-06	7.61e-05	-1.60187	Down	2.57e-09	1.15e-07	-0.395473	--	0.0678536	0.236727	WD40/YVTN repeat-like domain containing protein.
Os08g0156100	1.94	23.7667	2.89333	1.58333	14.1833	3.61481	Up	9.35e-32	1.65e-29	-3.03814	Down	1.68e-37	1.72e-34	-3.9079	Down	6.99e-21	1.53e-18	-0.744743	--	0.0342097	0.148573	Conserved hypothetical protein.
Os01g0638000	4.08333	47.5067	11.72	12.55	43.4867	3.54031	Up	1.74e-31	3.03e-29	-2.01916	Down	3.13e-10	2.45e-08	-1.92044	Down	3.95e-09	1.69e-07	-0.127557	--	0.614268	0.832838	UDP-glucuronosyl/UDP-glucosyltransferase family protein.
Os06g0252300	13.3767	148.77	72.1167	48.4533	134.567	3.47529	Up	8.74e-103	9.62e-100	-1.04468	Down	3.71e-05	0.00069487	-1.61842	Down	2.61e-22	6.55e-20	-0.144763	--	0.320231	0.609366	Hypothetical conserved gene.
Os01g0363900	11.6167	128.113	42.2133	35.1367	96.93	3.46315	Up	9.59e-72	6.25e-69	-1.60165	Down	5.66e-08	2.57e-06	-1.86637	Down	4.14e-32	2.26e-29	-0.402405	--	0.000976401	0.0095953	Similar to HASTY.
MSTRG.26543	0.353333	3.46333	1.02333	0.716667	2.93667	3.29306	Up	1.21e-12	3.83e-11	-1.75889	Down	9.66e-07	3.11e-05	-2.27279	Down	2.55e-05	0.000409231	-0.237982	--	0.344254	0.633512	PREDICTED: actin cytoskeleton-regulatory complex protein PAN1-like [Oryza sativa Japonica Group]
Os01g0696600	12.53	116.427	46.75	41.73	120.883	3.21596	Up	1.99e-16	1.02e-14	-1.31638	Down	0.00135038	0.0130931	-1.48026	Down	0.000394818	0.00406025	0.0541938	--	0.992148	0.997101	Similar to MDR-like ABC transporter.
Os01g0682700	0.176667	1.57333	0.193333	0.453333	1.12	3.15472	Up	3.5e-13	1.19e-11	-3.02466	Down	8.71e-12	8.79e-10	-1.79518	Down	0.000317749	0.00340339	-0.490326	--	0.143505	0.383022	Conserved hypothetical protein.
Os12g0614800	0.976667	8.05	2.21667	2.36333	7.32333	3.04305	Up	5.59e-11	1.37e-09	-1.8606	Down	1.8e-06	5.34e-05	-1.76817	Down	7.01e-05	0.000970541	-0.136488	--	0.672825	0.865249	Similar to cDNA clone:002-112-E04 full insert sequence.
Os08g0288500	8.49	67.9167	30.16	24.38	55.8	2.99993	Up	1.34e-75	9.75e-73	-1.17113	Down	1.62e-05	0.00035022	-1.47807	Down	4.41e-27	1.6e-24	-0.283501	--	0.0732183	0.24914	Similar to G-patch domain containing protein.
Os01g0672100	15.5967	122.15	58.38	50.8667	92.9033	2.96934	Up	7.38e-63	3.99e-60	-1.06511	Down	0.000119694	0.00186208	-1.26386	Down	1.44e-08	5.48e-07	-0.394852	--	0.0219265	0.107546	No apical meristem (NAM) protein domain containing protein.
Os12g0191400	0.95	7.44	2.68667	1.37333	4.75667	2.9693	Up	7.38e-18	4.37e-16	-1.46949	Down	1.89e-05	0.000398793	-2.43762	Down	4.66e-11	2.86e-09	-0.645352	--	0.0370411	0.157142	Conserved hypothetical protein.
Os01g0627967	4.40667	33.3233	9.27	5.67333	24.7567	2.91877	Up	1.3e-25	1.43e-23	-1.84589	Down	5.24e-08	2.39e-06	-2.55426	Down	2.31e-12	1.81e-10	-0.428716	--	0.307403	0.595768	Hypothetical protein.
Os10g0400100	33.9133	246.217	115.673	114.337	206.5	2.86	Up	1.07e-69	6.58e-67	-1.08987	Down	7.67e-09	4.33e-07	-1.10664	Down	2.85e-17	4.3e-15	-0.253787	--	0.114428	0.331538	Methionyl-tRNA synthetase class Ia domain containing protein.
Os02g0582800	19.93	139.967	53.9133	62.7	127.077	2.81207	Up	1.77e-41	4.72e-39	-1.37637	Down	8.4e-15	1.32e-12	-1.15855	Down	0.00439443	0.0279501	-0.139384	--	0.395934	0.679734	Conserved hypothetical protein.
Os03g0724700	21.7567	150.1	60.4933	64.0667	131.623	2.78639	Up	7.86e-49	3.06e-46	-1.31108	Down	1.61e-17	3.63e-15	-1.22828	Down	6.84e-07	1.76e-05	-0.189509	--	0.21177	0.483755	Similar to cDNA clone:002-104-C06 full insert sequence.
Os08g0155900	19.2633	128.677	28.7967	19.3533	119.807	2.73982	Up	3.17e-26	3.72e-24	-2.15978	Down	7.94e-31	6.22e-28	-2.7331	Down	1.69e-15	2.13e-13	-0.103042	--	0.528015	0.778096	Similar to Pathogen-induced defense-responsive protein.
Os08g0156000	8.51667	56.1567	9.68333	8.13	56.6467	2.7211	Up	4.53e-23	4.2e-21	-2.53588	Down	2.65e-14	3.86e-12	-2.78813	Down	1.18e-19	2.35e-17	0.0125338	--	0.912418	0.969498	Conserved hypothetical protein.
Os01g0158500	7.47667	44.2067	14.7067	11.55	27.1167	2.5638	Up	6.59e-22	5.61e-20	-1.58779	Down	2.39e-08	1.19e-06	-1.93637	Down	2.19e-12	1.73e-10	-0.705084	--	0.0120262	0.0690718	Similar to arginyl-tRNA synthetase.
Os03g0283100	57.1633	335.293	109.55	113.047	205.2	2.55226	Up	5.91e-28	8.32e-26	-1.61383	Down	1.56e-14	2.36e-12	-1.56851	Down	2.59e-13	2.37e-11	-0.708393	--	2.29e-08	8.79e-07	Similar to In2-1 protein.
Os12g0257000	31.84	184.863	72.78	67.2533	117.41	2.53755	Up	2.89e-53	1.3e-50	-1.34485	Down	1.21e-15	2.11e-13	-1.45878	Down	1.27e-10	7.27e-09	-0.654904	--	0.000355108	0.00423201	Serine carboxypeptidase I precursor (EC 3.4.16.5) (Carboxypeptidase C).
Os01g0628000	1.69	9.64667	1.77	0.813333	5.42	2.51301	Up	1.48e-11	3.99e-10	-2.44628	Down	6.09e-11	5.33e-09	-3.56811	Down	2.13e-09	9.66e-08	-0.831738	--	0.0948097	0.295201	Cytochrome P450 family protein.
Os12g0191500	2.01667	10.7067	4.28333	2.97333	9.87667	2.40846	Up	4.97e-24	4.99e-22	-1.3217	Down	1.37e-07	5.58e-06	-1.84836	Down	8.66e-09	3.46e-07	-0.116413	--	0.469578	0.736456	Similar to Peroxidase 43 precursor (EC 1.11.1.7) (Atperox P43).
Os12g0248600	2.40667	12.5533	2.76333	2.2	7.48333	2.38296	Up	7.68e-09	1.27e-07	-2.18359	Down	9.7e-06	0.000226634	-2.5125	Down	2.81e-12	2.18e-10	-0.746318	--	0.0312802	0.139093	Hypothetical protein.
Os10g0527400	28.2367	144.687	53.4067	40.45	146.173	2.35729	Up	9.07e-19	5.84e-17	-1.43784	Down	7.74e-09	4.35e-07	-1.83872	Down	1.12e-13	1.09e-11	0.0147482	--	0.868174	0.953728	Similar to Tau class GST protein 3.
Os01g0605100	32.4	159.83	45.5367	46.1767	96.0867	2.30247	Up	3.3e-39	8.11e-37	-1.81144	Down	6.59e-30	4.91e-27	-1.7913	Down	1.06e-23	2.92e-21	-0.73413	--	2.73e-11	1.86e-09	Similar to BCS1 protein-like protein.
Os05g0588800	4.62333	21.56	8.05667	10.1533	21.0267	2.22135	Up	4.75e-28	6.77e-26	-1.4201	Down	3.71e-10	2.85e-08	-1.0864	Down	2.35e-07	6.76e-06	-0.036137	--	0.710668	0.883552	Similar to Yarrowia lipolytica chromosome D of strain CLIB99 of Yarrowia lipolytica.
Os12g0443700	96.5933	423.277	158.977	125.587	258.707	2.13161	Up	7.63e-47	2.62e-44	-1.41279	Down	4.69e-14	6.5e-12	-1.75292	Down	1.88e-22	4.78e-20	-0.710284	--	0.000282775	0.00352436	Similar to Glu-prolyl-tRNA aminoacyl synthetase (Fragment).
Os04g0614700	30.27	130.983	44.9633	63.9633	66.2933	2.11342	Up	8.68e-28	1.2e-25	-1.54256	Down	1.01e-11	1e-09	-1.03407	Down	6.6e-07	1.71e-05	-0.982448	--	6.17e-07	1.74e-05	Similar to OSIGBa0126B18.8 protein.
Os01g0605000	13.74	58.38	18.1767	16.8267	34.0967	2.08709	Up	2.83e-16	1.43e-14	-1.68339	Down	9.33e-23	3.75e-20	-1.79472	Down	1.45e-25	4.57e-23	-0.775844	--	2.98e-07	9.05e-06	Hypothetical protein.
Os04g0172100	1.37667	5.77333	1.98333	1.75333	5.02333	2.06823	Up	1.2e-08	1.93e-07	-1.54148	Down	2.58e-05	0.000517641	-1.7193	Down	2.45e-06	5.36e-05	-0.20076	--	0.399862	0.682296	Conserved hypothetical protein.
Os02g0129800	18.1967	75.45	14.5033	8.76667	50.24	2.05185	Up	5.38e-31	9.14e-29	-2.37914	Down	1.18e-22	4.62e-20	-3.10542	Down	4.92e-16	6.51e-14	-0.586684	--	0.0128074	0.0722395	Conserved hypothetical protein.
Os01g0627900	1.51667	6.28333	2.46667	1.05667	3.63333	2.05063	Up	3.77e-14	1.47e-12	-1.34897	Down	9.99e-07	3.21e-05	-2.57201	Down	1.23e-26	4.15e-24	-0.790236	--	0.0577707	0.213138	Similar to Cytochrome P450.
MSTRG.6288	0.476667	1.95333	0.95	0.856667	1.75333	2.03489	Up	1.07e-10	2.5e-09	-1.03994	Down	7.41e-05	0.00125188	-1.18913	Down	2.18e-05	0.000356479	-0.155838	--	0.38883	0.674417	--
Os03g0618300	44.1233	179.247	54.6333	41.02	92.31	2.02233	Up	2.71e-13	9.35e-12	-1.71409	Down	2.41e-07	9.22e-06	-2.12755	Down	3.83e-21	8.66e-19	-0.957387	--	0.000363573	0.00431247	Isopenicillin N synthase family protein.
Os08g0295300	65.5667	261.037	104.567	108.39	195.08	1.99322	Up	7.61e-48	2.8e-45	-1.31983	Down	2.59e-14	3.78e-12	-1.26802	Down	6.11e-11	3.66e-09	-0.420187	--	0.0115703	0.067282	Similar to Threonyl-tRNA synthetase cytoplasmic (EC 6.1.1.3) (Threonine--tRNA ligase) (ThrRS).
Os10g0509401	62.78	245.82	49.9067	41.0533	150.96	1.96923	Up	1.49e-07	1.93e-06	-2.3003	Down	6.89e-06	0.000169578	-2.58203	Down	5.85e-09	2.41e-07	-0.703436	--	0.0987844	0.302034	Conserved hypothetical protein.
Os02g0580600	0.896667	3.35333	0.9	1.26667	2.25667	1.90295	Up	3.43e-09	6.07e-08	-1.8976	Down	1.11e-07	4.62e-06	-1.40456	Down	0.000203863	0.00234949	-0.571403	--	0.0975938	0.300055	Similar to Dimethylaniline monooxygenase-like protein.
Os01g0173900	13.87	51.77	20.1433	19.4567	46.23	1.90015	Up	3.61e-38	8.48e-36	-1.36181	Down	1.56e-09	1.07e-07	-1.41185	Down	9.44e-21	2.05e-18	-0.163287	--	0.13417	0.367176	Similar to MRP-like ABC transporter.
Os01g0954000	16.7467	61.8133	21.3633	21.8767	45.2133	1.88404	Up	3.06e-18	1.88e-16	-1.53278	Down	8.6e-12	8.71e-10	-1.49853	Down	3.81e-11	2.36e-09	-0.45117	--	0.0249159	0.117955	NADPH-dependent FMN reductase family protein.
Os03g0373500	1.48333	5.38	1.32333	1.64667	4	1.85876	Up	2.22e-06	2.17e-05	-2.02343	Down	6.37e-08	2.85e-06	-1.70806	Down	1.89e-05	0.000315959	-0.427606	--	0.256435	0.539545	Hypothetical protein.
MSTRG.23133	13.3467	48.0367	23.9533	21.8533	33.9667	1.84766	Up	5.04e-15	2.2e-13	-1.00391	Down	6.13e-05	0.00106605	-1.13628	Down	1.32e-06	3.14e-05	-0.500016	--	0.0118232	0.0682955	--
Os05g0506000	28.95	98.7333	36.3033	32.28	74.07	1.76997	Up	1.29e-16	6.75e-15	-1.44344	Down	2.37e-09	1.54e-07	-1.6129	Down	2.77e-09	1.24e-07	-0.414648	--	0.0192321	0.0976116	Similar to MS5-like protein (Fragment).
Os10g0401000	13.25	41.0267	20.3167	18.2967	26.9033	1.63057	Up	1.73e-09	3.27e-08	-1.0139	Down	0.00013071	0.00199694	-1.16498	Down	0.00123187	0.0102882	-0.608777	--	0.0297444	0.134388	Conserved hypothetical protein.
Os08g0148267	3.48	10.76	4.74333	5.25667	10.98	1.62852	Up	4.14e-14	1.61e-12	-1.1817	Down	1.71e-07	6.77e-06	-1.03346	Down	6.58e-08	2.16e-06	0.0292	--	0.894489	0.963145	Hypothetical conserved gene.
Os01g0172100	9.56667	29.3033	12.6233	13.29	19.92	1.61498	Up	5.32e-11	1.31e-09	-1.21497	Down	1.73e-05	0.000368834	-1.14072	Down	0.00269554	0.0191665	-0.556847	--	0.00283019	0.0226049	Similar to Triose phosphate/phosphate translocator non-green plastid chloroplast precursor (CTPT).
Os03g0198200	4.93333	15.0567	4.87333	3.44333	8.53333	1.60977	Up	5.03e-09	8.66e-08	-1.62742	Down	7.38e-09	4.18e-07	-2.12852	Down	1.14e-09	5.48e-08	-0.819221	--	0.00840012	0.0529397	Hypothetical protein.
Os12g0578600	0.913333	2.74667	1.26	1.06667	1.92	1.58847	Up	8.78e-09	1.43e-07	-1.12426	Down	1.35e-05	0.000300759	-1.36457	Down	0.00188403	0.0144463	-0.516576	--	0.0122763	0.0700157	Zinc finger C2H2-type domain containing protein.
Os11g0135400	28.1333	78.87	38.4467	35.8967	61.1233	1.4872	Up	6.95e-11	1.68e-09	-1.03662	Down	2.97e-06	8.32e-05	-1.13563	Down	1.29e-07	3.98e-06	-0.367753	--	0.0314713	0.139662	60S acidic ribosomal protein P0.
Os09g0520700	133.577	363.74	160.72	145.637	271.287	1.44524	Up	2.1e-18	1.32e-16	-1.17836	Down	5.89e-16	1.1e-13	-1.32053	Down	1.27e-10	7.27e-09	-0.423089	--	0.000859989	0.00867429	Similar to RNA helicase.
Os01g0934800	37.1267	98.4067	29.5267	25.89	89.05	1.4063	Up	7.46e-07	8.21e-06	-1.73674	Down	1.31e-16	2.65e-14	-1.92636	Down	1.35e-08	5.18e-07	-0.14414	--	0.527535	0.777654	Alpha/beta hydrolase fold-1 domain containing protein.
Os04g0476400	2.14	5.38667	2.54667	1.91333	3.32333	1.33178	Up	7.36e-11	1.77e-09	-1.08078	Down	2.5e-06	7.14e-05	-1.4933	Down	1.15e-05	0.000206624	-0.696762	--	0.00134728	0.0124386	Similar to OSIGBa0106G07.13 protein.
Os12g0168700	7.26667	16.0533	4.79333	7.58333	10.37	1.14351	Up	1e-06	1.07e-05	-1.74377	Down	1.98e-10	1.6e-08	-1.08197	Down	6.88e-08	2.24e-06	-0.630457	--	0.00278183	0.0223152	AMP-dependent synthetase and ligase domain containing protein.
Os12g0133050	46.2967	97.9033	48.0667	38.32	61.64	1.08045	Up	6.96e-09	1.16e-07	-1.02632	Down	4.58e-07	1.61e-05	-1.35326	Down	3.29e-14	3.54e-12	-0.667491	--	5.13e-05	0.00080796	Similar to 60S acidic ribosomal protein P0.
Os03g0646200	7.03667	14.8767	6.33	5.18333	9.86333	1.08009	Up	3.66e-09	6.45e-08	-1.23277	Down	2.24e-07	8.6e-06	-1.5211	Down	3.38e-10	1.79e-08	-0.592904	--	0.00527162	0.0368598	Peptidase C12 ubiquitin carboxyl-terminal hydrolase 1 domain containing protein.
Os06g0539066	4.89667	10.04	3.91667	2.68333	6.19333	1.03589	Up	1.48e-07	1.92e-06	-1.35806	Down	1.24e-07	5.1e-06	-1.90366	Down	1.4e-14	1.55e-12	-0.696971	--	0.00866396	0.0542828	Conserved hypothetical protein.
Os04g0588350	0.25	2.66667	0.643333	1.03	2.16	3.41504	Up	4.58e-06	4.14e-05	-2.0514	Down	1.16e-05	0.000266164	-1.37239	Down	0.000171177	0.00204571	-0.304006	--	0.319631	0.608585	Similar to nucleotidyltransferase family protein.
Os01g0715500	1.25333	4.16	1.35667	0.84	2.49333	1.73081	Up	6.7e-06	5.8e-05	-1.61652	Down	8.21e-06	0.000196974	-2.30812	Down	3.96e-08	1.37e-06	-0.738508	--	0.0809824	0.267307	Similar to voltage-dependent anion channel protein2.
Os08g0528000	0.11	0.54	0.193333	0.0933333	0.296667	2.29546	Up	2.11e-05	0.000160065	-1.48187	Down	0.00113149	0.011368	-2.5325	Down	3.82e-05	0.00057881	-0.864117	--	0.0532564	0.202035	Peptidase C19 ubiquitin carboxyl-terminal hydrolase 2 family protein.
Os12g0244800	0.49	1.04333	0.443333	0.313333	0.77	1.09035	Up	2.7e-05	0.000199351	-1.23474	Down	0.000513102	0.00607547	-1.73543	Down	0.000163474	0.00197127	-0.43827	--	0.266838	0.551607	Conserved hypothetical protein.
Os08g0461100	1.48333	2.98333	1.10667	0.88	1.57667	1.00808	Up	3.37e-05	0.000243095	-1.4307	Down	5.8e-09	3.36e-07	-1.76135	Down	2.8e-05	0.000442901	-0.920047	--	0.000520152	0.0057942	Hypothetical conserved gene.
Os09g0421300	0.293333	1.32333	0.606667	0.51	0.896667	2.17356	Up	0.000118762	0.000734457	-1.1252	Down	0.00711643	0.0472247	-1.37561	Down	0.00501289	0.0308179	-0.561533	--	0.149523	0.392235	Phospholipase D lambda.
Os04g0488800	1.96333	5.6	2.44	1.73667	4.58333	1.51212	Up	0.000240171	0.0013714	-1.19855	Down	0.00225047	0.0195902	-1.68911	Down	0.000289937	0.00313748	-0.28903	--	0.437952	0.714131	Conserved hypothetical protein.
Os03g0151500	4.61333	11.4333	3.10333	4.74667	14.1833	1.30936	Up	0.000432807	0.00229347	-1.88136	Down	0.000217708	0.00305057	-1.26826	Down	1.36e-06	3.2e-05	0.310951	--	0.396797	0.680245	Conserved hypothetical protein.
Os01g0753150	2.30333	5.62	1.56	1.69667	3.13333	1.28685	Up	0.000445755	0.0023531	-1.84902	Down	3.17e-07	1.17e-05	-1.72787	Down	9.08e-06	0.000168272	-0.842872	--	0.00852228	0.0535506	Optic atrophy 3-like domain containing protein.
Os04g0551700	1.28	2.64333	1.19667	1.05333	1.69333	1.04621	Up	0.000774832	0.00378506	-1.14334	Down	7.3e-06	0.000177713	-1.3274	Down	1.83e-05	0.000307952	-0.642492	--	0.0130079	0.073084	PAP fibrillin family protein.
Os12g0147200	2.95333	7.62667	1.09333	2.61	5.61333	1.36871	Up	0.00230325	0.00959947	-2.80232	Down	4.81e-09	2.86e-07	-1.547	Down	2.51e-05	0.000403933	-0.442195	--	0.184423	0.445311	Conserved hypothetical protein.
MSTRG.17311	1.05667	2.28667	0.413333	0.736667	1.25	1.11373	Up	0.00493968	0.0182696	-2.46787	Down	1.03e-08	5.64e-07	-1.63416	Down	0.000198753	0.00230142	-0.871318	--	0.0318889	0.140928	--
Os04g0206650	0.01	7.51333	1.91667	2.79333	6.87333	9.55331	Up	3.83e-20	2.76e-18	-1.97085	Down	1.81e-08	9.24e-07	-1.42747	Down	4.31e-07	1.16e-05	-0.128443	--	0.549812	0.792803	Hypothetical protein.
Os09g0483150	0.01	2.92	0.783333	0.773333	1.74667	8.18982	Up	2.48e-09	4.51e-08	-1.89827	Down	0.000952433	0.00997876	-1.91681	Down	0.000916982	0.0080949	-0.741364	--	0.133217	0.365631	Hypothetical gene.
Os04g0206350	0.01	1.42667	0.39	0.416667	1.27333	7.1565	Up	7.76e-12	2.18e-10	-1.8711	Down	0.00013358	0.0020314	-1.77568	Down	0.000148493	0.00181743	-0.164038	--	0.679526	0.868356	Hypothetical protein.
Os08g0156066	0.01	1.04	0.0333333	0.14	1.00667	6.70044	Up	1.27e-08	2.02e-07	-4.96347	Down	7.07e-06	0.000173503	-2.89308	Down	0.00212513	0.0158496	-0.0469975	--	0.0576421	0.212767	Hypothetical gene.
Os07g0251301	0.01	3.00333	0.24	0.01	2.92	8.23042	Up	2.19e-08	3.34e-07	-3.64546	Down	0.000131017	0.00199957	-8.23042	Down	4.77e-07	1.27e-05	-0.0405962	--	0.0681662	0.237571	Similar to Ribosomal phosphoprotein P0.
Os04g0206300	0.01	3	0.51	0.556667	2.64	8.22882	Up	2.06e-13	7.21e-12	-2.55639	Down	2.78e-06	7.86e-05	-2.43008	Down	0.000119187	0.0015193	-0.184425	--	0.0169991	0.0892174	Similar to OSIGBa0147O06.5 protein.
Os04g0614650	12.3333	60.1967	17.6567	24.7267	56.8933	2.28712	Up	2.28e-08	3.46e-07	-1.76947	Down	0.000142462	0.00213592	-1.28362	Down	0.00431354	0.0275369	-0.081424	--	0.0196892	0.0992646	Similar to OSIGBa0126B18.8 protein.
Os02g0554200	0.676667	5.28	1.2	0.513333	3.05333	2.96402	Up	3.32e-06	3.13e-05	-2.1375	Down	0.000177421	0.00256575	-3.36257	Down	8.05e-07	2.03e-05	-0.790153	--	0.00916265	0.056536	Conserved hypothetical protein.
Os11g0136101	0.0133333	0.54	0.143333	0.08	0.446667	5.33985	Up	4.13e-06	3.79e-05	-1.91359	Down	0.00323174	0.0259725	-2.75489	Down	0.00607386	0.0358498	-0.273761	--	0.0318912	0.140928	Hypothetical protein.
MSTRG.21184	0.19	1.02667	0.273333	0.05	0.613333	2.4339	Up	2.4e-05	0.00018004	-1.90923	Down	0.000670446	0.00749651	-4.3599	Down	3.52e-09	1.53e-07	-0.743225	--	0.0284738	0.13014	--
MSTRG.29377	0.123333	0.97	0.0633333	0.0533333	0.693333	2.97542	Up	6.09e-05	0.000407887	-3.93695	Down	0.00130179	0.0127459	-4.18488	Down	7.79e-05	0.00105975	-0.484436	--	0.0361826	0.154531	--
Os10g0122500	0.01	0.4	0.01	0.01	0.533333	5.32193	Up	0.000408222	0.00217728	-5.32193	Down	0.000735634	0.00806192	-5.32193	Down	0.00266913	0.0190247	0.415037	--	0.0365621	0.155638	Hypothetical conserved gene.
Os01g0653500	0.01	0.25	0.01	0.01	0.246667	4.64386	Up	0.000564611	0.00287507	-4.64386	Down	0.000951364	0.00997458	-4.64386	Down	0.00330907	0.0225273	-0.0193653	--	0.560444	0.798945	Conserved hypothetical protein.
Os03g0705800	10.0533	21.1033	10.44	5.24333	19.36	1.0698	Up	0.000983788	0.00465079	-1.01535	Down	0.000388858	0.00487522	-2.00891	Down	2.96e-07	8.28e-06	-0.124392	--	0.0557049	0.20794	Protein of unknown function DUF3049 domain containing protein.
Os01g0697250	0.01	0.556667	0.01	0.01	0.48	5.79874	Up	0.00135652	0.00611255	-5.79874	Down	0.00214502	0.0188251	-5.79874	Down	0.00660555	0.0381987	-0.213779	--	0.0522418	0.199762	Similar to OSIGBa0132O24.2 protein.
Os10g0542700	0.266667	1.17	0.27	0.106667	1.33333	2.1334	Up	0.00151028	0.0066767	-2.11548	Down	0.00425711	0.0320225	-3.45533	Down	0.00177843	0.0138138	0.188529	--	0.0103153	0.0618326	Protein of unknown function DUF241 plant family protein.
Os09g0465400	2.28	5.31667	2.10667	0.656667	4.82	1.22149	Up	0.00197491	0.00842272	-1.33556	Down	0.00180294	0.0164844	-3.01729	Down	2.42e-07	6.93e-06	-0.141489	--	0.0202015	0.100974	Adenine nucleotide translocator 1 domain containing protein.
MSTRG.7640	0.123333	1.04667	0.123333	0.0133333	0.893333	3.08517	Up	0.0107726	0.0349439	-3.08517	Down	0.00162769	0.0152075	-6.29462	Down	1.94e-05	0.000323947	-0.228532	--	0.0532601	0.202035	PREDICTED: translation initiation factor IF-2-like [Oryza sativa Japonica Group]

## Sheet: Gene set B
Table S5. Root up-regulated DEGs that systemically responded to sulfate resupply
Gene ID	CK_R_ mean FPKM	S0_R_ mean FPKM	SR_R_ mean FPKM	SPSR_R_ mean FPKM	SPS0_R_ mean FPKM	Log2 (S0/CK)	Up/Down (S0/CK)	P_Value (S0/CK)	FDR (S0/CK)	Log2 (SR/S0)	Up/Down (SR/S0)	P_Value (SR/S0)	FDR (SR/S0)	Log2 (SPSR/S0)	Up/Down (SPSR/S0)	P_Value (SPSR/S0)	FDR (SPSR/S0)	Log2 (SPS0/S0)	Up/Down (SPS0/S0)	P_Value (SPS0/S0)	FDR (SPS0/S0)	Annotation
Os02g0305950	1.62667	10.4667	3.17333	6.83333	3.74667	2.68581	Up	5.48812e-09	9.38119e-08	-1.72173	Down	0.000348298	0.00444913	-0.615141	--	0.201216	0.421979	-1.48212	Down	0.00608968	0.0412707	Similar to calmodulin binding protein. (Os02t0305950-00) / OsSAUR7 - Auxin-responsive SAUR gene family member expressed
Os08g0534300	2.40667	5.58333	19.97	11.84	6.56333	3.05273	Up	7.03048e-22	5.97367e-20	-1.83864	Down	2.71602e-05	0.000540846	-0.754165	--	0.0421054	0.148438	-1.60533	Down	0.000937683	0.00928867	Similar to calmodulin binding protein. (Os08t0534300-00)
Os08g0534950	2.20667	18.1767	5.24333	10.6833	5.85667	3.04215	Up	3.7878e-20	2.73784e-18	-1.79353	Down	4.17909e-05	0.000770028	-0.766726	--	0.0415167	0.146785	-1.63394	Down	0.000849389	0.00858744	Similar to calmodulin binding protein. (Os08t0534950-00) / auxin responsive protein putative expressed
Os04g0541700	30.36	68.08	14.95	39.5833	22.74	1.16506	Up	5.30381e-06	4.70684e-05	-2.18709	Down	3.57632e-17	7.88803e-15	-0.782338	--	0.165489	0.371523	-1.582	Down	1.92943e-08	7.46056e-07	OsHOX22 / Similar to Homeobox-leucine zipper protein HOX22. (Os04t0541700-01);Homeodomain-leucine zipper (HD-Zip) protein, Transcription factor, ABA-mediated drought and salt tolerance (Os04t0541700-02)
Os01g0117266	0.186667	1.09333	0.07	1.17667	0.116667	2.5502	Up	0.0116599	0.0372661	-3.96523	Down	0.00118396	0.0117787	0.105972	--	0.0111023	0.0564672	-3.22827	Down	0.00644338	0.0430781	RECEPTOR-LIKE CYTOPLASMIC KINASE 17
Os06g0104900	0.803333	40.69	7.31667	21.8367	5.13	5.66253	Up	1.41708e-09	2.73222e-08	-2.47542	Down	1.29165e-21	4.4721e-19	-0.897922	--	0.0097623	0.0512099	-2.98764	Down	6.37869e-08	2.23469e-06	Similar to L-lactate dehydrogenase B (EC 1.1.1.27) (LDH-B) (Fragment). (Os06t0104900-01)
Os02g0668500	21.1733	98.0933	40.58	70.1633	30.9567	2.21191	Up	1.10752e-17	6.40996e-16	-1.27339	Down	1.66349e-08	8.56958e-07	-0.483438	--	0.00857122	0.0464697	-1.6639	Down	9.56479e-10	4.88743e-08	Cellular retinaldehyde-binding/triple function / Rho-GTPase-activating protein-related putative expressed
Os03g0179700	0.126667	4.8	0.973333	3.39667	1.27333	5.24393	Up	4.446e-14	1.7238e-12	-2.30203	Down	7.29952e-05	0.00123706	-0.498915	--	0.256226	0.488401	-1.91442	Down	0.00127352	0.0118957	DUF567 domain containing protein

## Sheet: Gene set C
Table S5. Root up-regulated DEGs that locally and systemically responded to sulfate resupply
Gene ID	CK_R_ mean FPKM	S0_R_ mean FPKM	SR_R_ mean FPKM	SPSR_R_ mean FPKM	SPS0_R_ mean FPKM	Log2 (S0/CK)	Up/Down (S0/CK)	P_Value (S0/CK)	FDR (S0/CK)	Log2 (SR/S0)	Up/Down (SR/S0)	P_Value (SR/S0)	FDR (SR/S0)	Log2 (SPSR/S0)	Up/Down (SPSR/S0)	P_Value (SPSR/S0)	FDR (SPSR/S0)	Log2 (SPS0/S0)	Up/Down (SPS0/S0)	P_Value (SPS0/S0)	FDR (SPS0/S0)	Annotation
Os02g0491300	0.01	6.66	0.786667	0.0933333	0.29	9.37938	Up	4.06e-21	3.19e-19	-3.0817	Down	4.46e-06	0.000117421	-6.15699	Down	8.89e-27	3.08e-24	-4.5214	Down	7.53e-14	7.6e-12	Secretory fasciclin glycoprotein Regulation of anther development and pollen formation
MSTRG.5654	0.01	9.48333	1.56333	0.506667	3.37	9.88925	Up	4.72e-29	7.11e-27	-2.60077	Down	0.00316448	0.025577	-4.22629	Down	1.47e-33	8.84e-31	-1.49265	Down	3.33e-06	7.58e-05	--
MSTRG.5655	0.01	1.06	0.18	0.08	0.07	6.72792	Up	1.02e-13	3.75e-12	-2.558	Down	0.00195679	0.0175551	-3.72792	Down	8.25e-10	4.1e-08	-3.92057	Down	2.34e-09	1.11e-07	--
Os03g0663900	0.01	4	0.726667	0.38	1.01333	8.64386	Up	6.6e-13	2.16e-11	-2.46063	Down	9.02e-05	0.00147493	-3.39593	Down	7e-06	0.000133811	-1.98089	Down	0.00122834	0.0115632	Hypothetical conserved gene.
MSTRG.5506	0.01	1.38	0.256667	0.03	0.21	7.10852	Up	3.75e-14	1.46e-12	-2.4267	Down	6.9e-10	5.13e-08	-5.52356	Down	2.66e-13	2.43e-11	-2.71621	Down	0.00415301	0.0304114	Zinc knuckle family protein [Oryza sativa Japonica Group]
Os01g0323950	0.01	1.45	0.01	0.01	0.1	7.17991	Up	2.72e-09	4.92e-08	-7.17991	Down	7.28e-09	4.15e-07	-7.17991	Down	5.75e-08	1.92e-06	-3.85798	Down	0.00239168	0.0197772	Similar to Glycine-rich protein 2b.
Os09g0483200	0.593333	2823.57	686.91	427.713	1176.99	12.2164	Up	2.65e-47	9.42e-45	-2.03933	Down	1e-07	4.21e-06	-2.7228	Down	3.54e-31	1.71e-28	-1.26241	Down	7.18e-05	0.00107944	Similar to Ubiquitin/ribosomal fusion protein (Fragment).
Os01g0627800	0.353333	814.67	164.16	70.77	397.547	11.171	Up	1.97e-134	4.2e-131	-2.31111	Down	2.65e-07	1e-05	-3.52501	Down	2.62e-32	1.48e-29	-1.03509	Down	0.00540661	0.0376121	Similar to Cytochrome P450 monooxygenase CYP72A5 (Fragment).
Os09g0483300	0.23	58.1167	28.5767	11.6233	27.84	7.98117	Up	3.1e-82	2.54e-79	-1.02411	Down	0.000581303	0.00671668	-2.32193	Down	5.29e-38	4.32e-35	-1.06179	Down	4.74e-09	2.09e-07	EF hand domain containing protein.
MSTRG.24093	0.03	7.44667	0.393333	0.926667	0.816667	7.95549	Up	5.92e-14	2.23e-12	-4.24277	Down	8.55e-16	1.54e-13	-3.00647	Down	1.08e-12	8.99e-11	-3.18878	Down	8.27e-15	9.54e-13	--
Os01g0101900	0.193333	44.74	1.59	2.70333	11.4967	7.85433	Up	7.36e-42	2.05e-39	-4.81447	Down	7.81e-27	4.85e-24	-4.04875	Down	3.37e-16	4.51e-14	-1.96035	Down	1.51e-13	1.46e-11	Similar to OSIGBa0075F02.3 protein.
Os10g0344500	1.44667	210.44	42.1667	10.6667	76.21	7.18453	Up	7.09e-89	6.66e-86	-2.31923	Down	1.72e-11	1.65e-09	-4.30223	Down	1.11e-86	1.09e-82	-1.46536	Down	0.000284038	0.00353864	Similar to cDNA clone:001-128-E01 full insert sequence.
MSTRG.12172	0.0366667	3.43667	0.15	0.01	0.01	6.5504	Up	4.9e-09	8.46e-08	-4.51798	Down	4.72e-07	1.65e-05	-8.42487	Down	4.09e-09	1.75e-07	-8.42487	Down	5.76e-10	3.05e-08	early embryogenesis protein [Oryza sativa Japonica Group]
Os07g0440900	0.07	5.31333	2.01333	1.78667	2.63333	6.24612	Up	7.94e-68	4.61e-65	-1.40003	Down	3.04e-06	8.46e-05	-1.57235	Down	2.32e-11	1.48e-09	-1.01273	Down	0.000119409	0.00168271	Conserved hypothetical protein.
Os04g0500600	0.04	2.6	0.753333	0.533333	0.726667	6.02237	Up	2.61e-11	6.74e-10	-1.78715	Down	0.00743313	0.0487616	-2.2854	Down	0.00476058	0.029685	-1.83915	Down	0.00145781	0.0132524	Hypothetical protein.
Os06g0652100	0.0166667	1.06667	0.356667	0.146667	0.29	6	Up	7.68e-12	2.15e-10	-1.58046	Down	0.000583306	0.00672938	-2.8625	Down	5.96e-08	1.98e-06	-1.87898	Down	0.000428542	0.00494141	Uncharacterized conserved protein UCP015417 vWA domain containing protein.
MSTRG.19551	0.24	14.6967	3.34333	1.17	3.06333	5.93631	Up	4.5e-50	1.77e-47	-2.13613	Down	9.76e-06	0.000227472	-3.65091	Down	1.43e-12	1.18e-10	-2.26231	Down	1.55e-06	3.92e-05	--
Os03g0165900	0.576667	22.9067	5.06333	2.38333	10.38	5.31189	Up	2.65e-50	1.06e-47	-2.17761	Down	5.37e-09	3.15e-07	-3.26471	Down	3.92e-18	6.52e-16	-1.14196	Down	0.00553886	0.0383643	Tetratricopeptide-like helical domain containing protein.
MSTRG.28997	0.0833333	2.79	0.856667	0.646667	1.17667	5.06523	Up	1.62e-27	2.17e-25	-1.70346	Down	0.000251673	0.00341871	-2.10917	Down	3e-06	6.39e-05	-1.24556	Down	0.00288532	0.022942	gag-pol polyprotein [Hordeum vulgare]
Os04g0203600	0.166667	5.25667	1.46	0.4	2.08	4.97911	Up	6.81e-26	7.67e-24	-1.84818	Down	5.56e-05	0.000982062	-3.71608	Down	6.14e-13	5.3e-11	-1.33756	Down	0.000240482	0.00307855	Similar to cDNA clone:002-100-D12 full insert sequence.
MSTRG.13384	0.48	14.5467	1.95	1.11667	2.75667	4.92151	Up	3.96e-88	3.61e-85	-2.89914	Down	1.62e-19	4.43e-17	-3.70342	Down	1.97e-52	4.84e-49	-2.39969	Down	2.83e-09	1.31e-07	--
Os11g0617700	0.0266667	0.77	0.07	0.06	0.133333	4.85175	Up	1.33e-09	2.58e-08	-3.45943	Down	0.000129539	0.00198413	-3.68182	Down	1.02e-05	0.000186548	-2.52982	Down	8.23e-05	0.00121146	Protein of unknown function DUF594 domain containing protein.
Os02g0772000	0.133333	3.75	0.87	1.19333	1.79667	4.81378	Up	1.58e-23	1.52e-21	-2.1078	Down	2.83e-13	3.52e-11	-1.65189	Down	4.64e-14	4.81e-12	-1.06157	Down	5.21e-07	1.49e-05	Similar to global transcription factor group.
Os08g0523200	0.37	8.49333	1.48667	0.85	3.54333	4.52073	Up	1.16e-27	1.58e-25	-2.51425	Down	2.83e-20	8.26e-18	-3.3208	Down	8.5e-20	1.7e-17	-1.26122	Down	1.06e-07	3.54e-06	Similar to MAB1.
Os04g0203450	0.1	2.24667	0.513333	0.11	0.68	4.48971	Up	2.61e-17	1.45e-15	-2.12982	Down	9.03e-05	0.00147508	-4.35221	Down	3.86e-08	1.34e-06	-1.72418	Down	0.00312182	0.0244443	Hypothetical protein.
Os01g0268600	0.333333	6.44	1.41667	1.22333	2.4	4.27202	Up	2.13e-37	4.82e-35	-2.18456	Down	4.38e-09	2.63e-07	-2.39624	Down	2.89e-20	6.04e-18	-1.42403	Down	1.08e-06	2.88e-05	Glycoside hydrolase family 31 protein.
Os01g0746400	0.18	3.46	0.266667	0.193333	0.356667	4.2647	Up	1.88e-23	1.79e-21	-3.69766	Down	6.31e-19	1.63e-16	-4.16161	Down	4.44e-22	1.08e-19	-3.27812	Down	3.78e-15	4.6e-13	Carotenoid cleavage dioxygenase 8 Control of lateral bud outgrowth Regulation of tillering Strigolactones biosynthesis
Os07g0637300	29.6967	559.983	203.123	153.157	275.427	4.23701	Up	1.96e-167	6.94e-164	-1.46303	Down	4.77e-10	3.61e-08	-1.87038	Down	1.39e-12	1.14e-10	-1.02372	Down	8.11e-07	2.22e-05	Similar to Pyruvate dehydrogenase kinase.
MSTRG.20433	1.57	27.3967	8.27667	6.51667	10.6533	4.12516	Up	3.03e-38	7.17e-36	-1.72688	Down	2.17e-08	1.08e-06	-2.07179	Down	9.23e-10	4.53e-08	-1.3627	Down	8.24e-08	2.81e-06	integrase core domain containing protein [Oryza sativa Japonica Group]
Os01g0695900	0.196667	3.29333	1.24667	0.446667	1.22333	4.06572	Up	6.14e-19	4e-17	-1.40147	Down	6.38e-05	0.00110344	-2.88228	Down	5.83e-07	1.53e-05	-1.42873	Down	0.00663222	0.0440384	OSMYB4.
Os05g0463000	0.916667	14.41	1.68333	0.113333	0.423333	3.97453	Up	4e-28	5.79e-26	-3.09768	Down	1.97e-14	2.95e-12	-6.99035	Down	4.73e-35	3.48e-32	-5.08913	Down	9.59e-22	2.63e-19	Similar to Receptor protein kinase-like protein.
Os01g0360150	0.26	3.72333	0.86	0.31	0.643333	3.84001	Up	1.78e-12	5.46e-11	-2.11419	Down	9.07e-05	0.00148133	-3.58625	Down	3.24e-09	1.42e-07	-2.53296	Down	2.98e-06	6.91e-05	Hypothetical protein.
Os02g0300700	30.76	409.88	193.943	124.2	201.087	3.73607	Up	2.01e-38	4.8e-36	-1.07957	Down	0.000403005	0.00501667	-1.72254	Down	2.62e-05	0.000418564	-1.02738	Down	0.000109728	0.00156084	Similar to Eukaryotic translation initiation factor 1A (EIF-1A) (EIF-4C).
Os07g0580300	0.396667	4.87	1.96	1.54333	2.32667	3.61792	Up	1.43e-17	8.21e-16	-1.31307	Down	0.000136901	0.00207027	-1.65787	Down	0.00143613	0.0116277	-1.06566	Down	0.00234015	0.0193989	Hypothetical conserved gene.
Os09g0450600	0.643333	7.15667	1.24333	0.58	1.08	3.47565	Up	1.94e-15	8.85e-14	-2.52507	Down	6.43e-09	3.7e-07	-3.62516	Down	1.81e-15	2.28e-13	-2.72826	Down	1.15e-14	1.29e-12	Similar to Protein HVA22.
Os07g0409500	0.246667	2.64333	0.446667	0.886667	1.29667	3.42172	Up	5.97e-13	1.96e-11	-2.56509	Down	2.53e-09	1.62e-07	-1.57589	Down	0.000663835	0.00617577	-1.02755	Down	0.00149263	0.0134877	BTB/POZ fold domain containing protein.
Os08g0486500	0.156667	1.63	0.393333	0.383333	0.466667	3.3791	Up	1.49e-06	1.52e-05	-2.05105	Down	0.000753012	0.00821307	-2.0882	Down	0.000940133	0.00824978	-1.80441	Down	0.00568718	0.0391134	Conserved hypothetical protein.
Os01g0695800	11.8133	121.173	21.9333	9.94667	27.06	3.35858	Up	7.99e-40	2.04e-37	-2.46588	Down	5.39e-22	1.91e-19	-3.60672	Down	1.53e-58	4.09e-55	-1.3645	Down	5.48e-05	0.000855746	Similar to MDR-like ABC transporter/OsABCB5.
Os03g0127500	1.06667	10.67	2.68667	0.503333	2.64667	3.32238	Up	8.26e-20	5.87e-18	-1.98967	Down	1.35e-07	5.51e-06	-4.4059	Down	1.23e-23	3.31e-21	-2.01131	Down	0.000298506	0.00369298	bZIP transcription factor bZIP-1 domain containing protein.
Os02g0720400	1.84	17.6967	2.36667	0.86	6.58667	3.2657	Up	4.23e-28	6.06e-26	-2.90255	Down	1.35e-27	8.74e-25	-4.363	Down	6.97e-45	8.92e-42	-1.42586	Down	1.36e-05	0.000258807	Protein of unknown function DUF506 plant domain containing protein.
Os01g0106400	84.1167	798.577	296.057	79.24	237.233	3.24697	Up	1.29e-23	1.25e-21	-1.43156	Down	2.88e-06	8.1e-05	-3.33313	Down	5.45e-27	1.93e-24	-1.75112	Down	2.44e-14	2.64e-12	Similar to Isoflavone reductase homolog IRL (EC 1.3.1.-).
Os09g0466300	0.89	7.97667	2.36333	0.71	1.34667	3.16391	Up	5.39e-19	3.55e-17	-1.75496	Down	6.18e-09	3.57e-07	-3.4899	Down	2.2e-07	6.37e-06	-2.56639	Down	8.41e-06	0.000171555	Similar to FIP1.
Os09g0309700	9.4	82.9367	19.9133	15.73	36.6467	3.14128	Up	1.23e-62	6.56e-60	-2.05828	Down	5.39e-15	8.67e-13	-2.39849	Down	1.08e-39	1.03e-36	-1.17833	Down	2.35e-10	1.34e-08	Ethylene response factor Transcription factor Negative regulation of ethylene biosynthesis Drought tolerance
Os04g0569100	2.15667	16	3.72667	1.86	3.08667	2.8912	Up	4.63e-43	1.38e-40	-2.10211	Down	4.1e-07	1.46e-05	-3.1047	Down	1.87e-18	3.26e-16	-2.37395	Down	9.98e-14	9.92e-12	Similar to OCL1 homeobox protein.
Os01g0370900	0.736667	5.44667	0.58	0.27	1.11667	2.88629	Up	1.49e-09	2.86e-08	-3.23125	Down	7.33e-11	6.35e-09	-4.33434	Down	6.25e-08	2.06e-06	-2.28617	Down	0.000194973	0.00257454	Similar to Glutathione transferase.
Os01g0909150	0.223333	1.64667	0.206667	0.273333	0.606667	2.88228	Up	8.06e-08	1.1e-06	-2.99417	Down	1.12e-06	3.56e-05	-2.59082	Down	5.37e-07	1.42e-05	-1.44057	Down	0.00457989	0.032907	Conserved hypothetical protein.
Os12g0143800	1.52333	10.98	3.96333	2.7	2.66667	2.84957	Up	1.41e-22	1.25e-20	-1.47009	Down	1.68e-06	5.06e-05	-2.02385	Down	3.21e-10	1.71e-08	-2.04177	Down	7.7e-13	6.66e-11	Meiosis-specific DNA recombinase Synaptonemal complex (SC) assembly
Os01g0716800	3.33	23.5567	2.85333	4.10333	6.4	2.82254	Up	4.59e-42	1.29e-39	-3.04542	Down	8.9e-30	6.46e-27	-2.52127	Down	1.72e-42	1.75e-39	-1.87999	Down	7.58e-23	2.38e-20	Endonuclease/exonuclease/phosphatase domain containing protein.
Os01g0137250	0.156667	1.09	0.22	0.04	0.123333	2.79856	Up	0.00415745	0.0158028	-2.30875	Down	0.000564525	0.00655845	-4.76818	Down	1.4e-06	3.29e-05	-3.14369	Down	0.000565411	0.00619704	Similar to Stress-induced receptor-like kinase 2.
Os01g0816100	15.0433	103.113	48.47	25.25	45.3467	2.77703	Up	1.06e-32	1.97e-30	-1.08907	Down	4.7e-11	4.17e-09	-2.02988	Down	3.46e-05	0.000531383	-1.18516	Down	3.84e-05	0.000631172	Similar to NAC domain protein.
Os01g0547600	0.436667	2.92333	0.02	0.01	0.0366667	2.74301	Up	6.9e-06	5.96e-05	-7.19147	Down	1.61e-16	3.19e-14	-8.19147	Down	3.54e-12	2.66e-10	-6.317	Down	1.31e-12	1.07e-10	High-affinity nitrate transporter Nitrate transport Auxin signaling
Os02g0102300	36.82	241.68	106.65	64.44	92.29	2.71454	Up	2.48e-29	3.81e-27	-1.18021	Down	4.54e-06	0.000119429	-1.90707	Down	3.99e-20	8.21e-18	-1.38885	Down	1.97e-10	1.15e-08	Arsenate reductase Sulfurtransferase/rhodanese-like protein Regulation of arsenic accumulation
Os04g0635000	4.06667	25.6033	5.91	1.2	1.67333	2.65441	Up	3.93e-08	5.67e-07	-2.1151	Down	1.02e-07	4.27e-06	-4.41523	Down	3.9e-18	6.51e-16	-3.93553	Down	3.61e-12	2.74e-10	Similar to H0315F07.10 protein.
Os12g0617250	2.37	14.8433	1.73	3.32667	6.45333	2.64686	Up	2.27e-15	1.03e-13	-3.10097	Down	1.96e-13	2.5e-11	-2.15767	Down	2.65e-05	0.000423668	-1.2017	Down	0.000217581	0.00282856	Hypothetical gene.
Os12g0512800	0.983333	6.02333	1.55667	0.926667	2.33333	2.61481	Up	7.33e-13	2.39e-11	-1.9521	Down	2.15e-06	6.24e-05	-2.70044	Down	1.81e-08	6.73e-07	-1.36817	Down	0.00747136	0.0483275	Cytochrome P450 71E1 (EC 1.14.13.68) (4-hydroxyphenylacetaldehyde oxime monooxygenase).
Os01g0842600	0.83	4.82	1.83333	1.51333	2.00333	2.53785	Up	2.27e-22	1.99e-20	-1.39456	Down	1.27e-06	3.96e-05	-1.6713	Down	1.42e-06	3.33e-05	-1.26663	Down	4.49e-09	1.98e-07	Similar to AAA-metalloprotease FtsH.
Os01g0876200	0.33	1.91	0.486667	0.2	0.593333	2.53303	Up	9.63e-08	1.28e-06	-1.97257	Down	0.00046642	0.00561364	-3.2555	Down	2.3e-06	5.08e-05	-1.68666	Down	0.00121674	0.0114719	Similar to Chloride channel protein CLC-c (AtCLC-c).
Os03g0712800	2.18	12.4867	4.71333	5.24	3.72333	2.51799	Up	3.59e-20	2.6e-18	-1.40557	Down	6.11e-05	0.00106418	-1.25275	Down	4.44e-05	0.000658946	-1.74572	Down	7.07e-05	0.00106427	Cytosolic glutamine synthetase
Os06g0600700	2.99	16.5867	5.18	4.67667	6.79333	2.47181	Up	1.42e-41	3.8e-39	-1.679	Down	5.57e-14	7.6e-12	-1.82647	Down	3.5e-23	9.27e-21	-1.28783	Down	4.07e-08	1.48e-06	Agenet domain containing protein.
Os03g0645900	1.97667	10.58	1.11	2.30667	3.52	2.4202	Up	2.51e-14	1e-12	-3.25271	Down	2.42e-37	2.4e-34	-2.19746	Down	2.48e-05	0.000399818	-1.58769	Down	1.53e-12	1.23e-10	Carotenoid oxygenase family protein.
Os10g0509600	10.74	57.2167	5.88667	6.80333	22.57	2.41344	Up	2.03e-27	2.69e-25	-3.28091	Down	9.74e-25	4.84e-22	-3.07212	Down	5.87e-29	2.54e-26	-1.34203	Down	1.83e-06	4.54e-05	Conserved hypothetical protein.
MSTRG.34257	0.66	3.50667	0.51	0.446667	1.67	2.40956	Up	4.39e-09	7.63e-08	-2.78153	Down	1.33e-09	9.18e-08	-2.97283	Down	1.65e-06	3.77e-05	-1.07025	Down	0.00319525	0.0248246	fibroin-like protein [Oryza sativa Japonica Group]
Os02g0206700	1.48667	7.65	2.27333	3.44	3.53333	2.36338	Up	9.41e-17	5e-15	-1.75065	Down	7.67e-07	2.53e-05	-1.15305	Down	0.000986323	0.00857582	-1.11443	Down	0.00216952	0.0182907	UDP-glucuronosyl/UDP-glucosyltransferase family protein.
Os12g0617400	2.66333	13.2167	2.01667	4.93333	5.72333	2.31105	Up	3.71e-13	1.25e-11	-2.71231	Down	5.79e-15	9.21e-13	-1.42172	Down	0.00213047	0.0158696	-1.20743	Down	0.000498758	0.00560759	Viviparous-14.
Os01g0138500	5.51	26.9867	0.826667	1.62667	1.72333	2.29212	Up	2.51e-11	6.51e-10	-5.0288	Down	1.86e-53	6.16e-50	-4.05226	Down	4.24e-31	2.01e-28	-3.96897	Down	2.44e-22	7.37e-20	Protein of unknown function DUF789 family protein.
Os06g0201000	2.02667	9.57333	2.66667	2.56333	2.58	2.23991	Up	4.46e-08	6.38e-07	-1.84398	Down	5.47e-06	0.000140166	-1.901	Down	2.01e-05	0.000332618	-1.89165	Down	6.21e-05	0.000951661	Conserved hypothetical protein.
Os01g0214500	12.95	60.3333	26.6867	21.0067	21.4133	2.22	Up	4.42e-10	9.26e-09	-1.17684	Down	5.18e-09	3.05e-07	-1.52211	Down	3.14e-09	1.38e-07	-1.49445	Down	1.81e-13	1.74e-11	Conserved hypothetical protein.
Os04g0435500	6.93	31.0167	12.4033	10.31	11.14	2.16212	Up	6.64e-24	6.57e-22	-1.32232	Down	1.99e-11	1.88e-09	-1.589	Down	5.02e-09	2.1e-07	-1.47729	Down	1.1e-06	2.9e-05	Glutathione S-transferase C-terminal-like domain containing protein.
Os01g0694000	0.323333	1.39	0.25	0.303333	0.236667	2.10399	Up	3.14e-05	0.000228623	-2.47508	Down	4.19e-08	1.95e-06	-2.19611	Down	0.000138068	0.00171047	-2.55416	Down	5.07e-05	0.000801861	Protein kinase core domain containing protein.
Os03g0445700	7.82	33.4433	16.1167	8.59333	12.0233	2.09648	Up	2.07e-08	3.17e-07	-1.05317	Down	0.000469042	0.00563835	-1.96043	Down	4.97e-09	2.08e-07	-1.47588	Down	1.57e-05	0.000293793	LATERAL ORGAN BOUNDARIES DOMAIN (LBD) protein Transcriptional activator Regulation of heading date and yield
Os02g0669100	240.38	1012.02	187.157	372.29	341.94	2.07384	Up	2.11e-27	2.79e-25	-2.43491	Down	9.89e-24	4.4e-21	-1.44273	Down	6.83e-08	2.23e-06	-1.56542	Down	2.71e-07	8.33e-06	Dehydrin family protein.
Os10g0521000	5.86667	24.2067	4.60333	7.95333	9.90667	2.04479	Up	1.33e-19	9.28e-18	-2.39465	Down	1.16e-15	2.04e-13	-1.60577	Down	5.83e-12	4.15e-10	-1.28893	Down	1.79e-06	4.45e-05	Similar to TRE1 protein (Fragment).
Os01g0686700	0.88	3.61	0.633333	0.683333	0.686667	2.03642	Up	1.04e-06	1.1e-05	-2.51096	Down	1.18e-06	3.72e-05	-2.40134	Down	1.13e-05	0.000203276	-2.39432	Down	2.84e-06	6.62e-05	Similar to protein binding protein.
Os07g0448600	102.52	419.203	58.5167	150.58	167.107	2.03174	Up	4.48e-13	1.5e-11	-2.84073	Down	2.98e-26	1.74e-23	-1.47712	Down	5.25e-05	0.000759284	-1.32688	Down	0.000257708	0.00325492	Hypothetical protein.
Os06g0659400	0.12	0.486667	0.11	0.0366667	0.01	2.0199	Up	0.00871795	0.0293026	-2.14543	Down	0.00716912	0.0474267	-3.73039	Down	0.00731239	0.0412565	-5.60486	Down	1.56e-06	3.94e-05	Protein of unknown function DUF231 plant domain containing protein.
Os04g0678400	38.33	149.243	51.1333	61.4033	52.2633	1.96112	Up	1.99e-07	2.5e-06	-1.54533	Down	1.18e-05	0.000269345	-1.28128	Down	0.00110973	0.00947243	-1.5138	Down	0.000168225	0.00226189	Zinc finger Dof-type domain containing protein.
Os01g0719000	7.58333	29.1	4.82667	2.51667	3.59667	1.94012	Up	3.29e-11	8.38e-10	-2.59192	Down	2.1e-08	1.06e-06	-3.53143	Down	4.37e-11	2.7e-09	-3.01629	Down	2.15e-11	1.48e-09	Protein of unknown function DUF581 family protein.
Os07g0448400	69.8767	267.32	36.57	96.6967	112.1	1.93569	Up	1.46e-17	8.32e-16	-2.86984	Down	1.53e-39	1.68e-36	-1.46703	Down	4.55e-06	9.2e-05	-1.25378	Down	0.000364769	0.00432325	Similar to Aquaporin PIP2-5.
Os06g0217700	0.656667	2.15667	0.6	0.25	0.54	1.71557	Up	0.000723218	0.00357115	-1.84577	Down	0.00012314	0.00189827	-3.1088	Down	6.72e-06	0.000129421	-1.99777	Down	0.000351778	0.00420227	Conserved hypothetical protein.
Os04g0570000	1.95667	6.41	1.46	0.126667	1.41667	1.71193	Up	2.15e-08	3.28e-07	-2.13436	Down	2.94e-12	3.15e-10	-5.66122	Down	4.48e-05	0.000663969	-2.17782	Down	0.000623224	0.00668588	Cytochrome P450 family protein.
Os11g0490300	4.31	13.0733	4.96	5.47333	6.41667	1.60087	Up	5.01e-11	1.24e-09	-1.39822	Down	6.93e-08	3.06e-06	-1.25614	Down	2.73e-08	9.78e-07	-1.02673	Down	6.82e-06	0.00014251	Hypothetical conserved gene.
Os09g0545100	2.53	7.64667	2.50333	1.42	3.32333	1.59569	Up	0.000122706	0.000756067	-1.61098	Down	1.78e-05	0.0003795	-2.42894	Down	7.94e-13	6.74e-11	-1.2022	Down	2.42e-05	0.000425252	Hypothetical conserved gene.
Os11g0648400	0.776667	2.31	0.863333	0.426667	0.48	1.57253	Up	0.00813432	0.0276581	-1.4199	Down	0.00724816	0.0478494	-2.43671	Down	0.000137647	0.0017067	-2.26679	Down	9.67e-05	0.00139496	Protein of unknown function DUF3615 domain containing protein.
Os02g0258800	20.05	58.0633	20.4533	6.94667	6.82	1.53403	Up	4.2e-09	7.32e-08	-1.50529	Down	0.00555437	0.0392367	-3.06323	Down	1.11e-09	5.38e-08	-3.08978	Down	7.24e-18	1.19e-15	Conserved hypothetical protein.
Os01g0850900	265.453	766.863	105.9	166	338.353	1.53051	Up	1.4e-08	2.22e-07	-2.85627	Down	2.62e-22	9.77e-20	-2.20779	Down	3.06e-12	2.34e-10	-1.18044	Down	6.54e-05	0.000993985	SOUL haem-binding protein domain containing protein.
Os05g0244500	20.3	56.8633	14.4567	3.65	3.06	1.48602	Up	5.72e-06	5.03e-05	-1.97576	Down	3.2e-07	1.17e-05	-3.96153	Down	1.09e-34	7.66e-32	-4.2159	Down	1.11e-20	2.54e-18	Glycoside hydrolase family 5 protein.
Os06g0553001	7.65	21.3567	4.64	2.6	3.39	1.48115	Up	0.00214255	0.0090292	-2.20249	Down	0.000550528	0.00642592	-3.0381	Down	2.59e-05	0.000414008	-2.65533	Down	5.73e-05	0.000887824	Conserved hypothetical protein.
Os02g0649300	3.45	9.55333	0.14	0.163333	0.0766667	1.46941	Up	0.000419274	0.00222859	-6.09251	Down	1.1e-39	1.26e-36	-5.87011	Down	0.00519686	0.0317366	-6.96126	Down	7.14e-33	5.01e-30	HD-ZIP I protein Transcription activator Stress response Panicle development
Os08g0467300	2.96333	8.14667	3.12667	2.79667	3.62667	1.45899	Up	1.67e-09	3.18e-08	-1.38158	Down	7.83e-06	0.000188836	-1.5425	Down	3.24e-06	6.81e-05	-1.16757	Down	4.48e-07	1.31e-05	Clathrin adaptor phosphoinositide-binding GAT-like domain containing protein.
Os11g0668300	5.76333	15.7567	5.72333	5.13667	7.43667	1.45099	Up	5.85e-14	2.21e-12	-1.46103	Down	1.61e-05	0.000348511	-1.61706	Down	0.00622888	0.0365594	-1.08323	Down	5.62e-06	0.000119949	Hypothetical conserved gene.
Os04g0636500	0.7	1.89	0.576667	0.216667	0.41	1.43296	Up	0.000847028	0.00409145	-1.71258	Down	0.00239203	0.0205319	-3.12484	Down	4.15e-09	1.77e-07	-2.20469	Down	0.000665712	0.00703177	BTB domain containing protein.
Os01g0891400	2.23333	5.54	2.44667	1.87333	2.7	1.31069	Up	3.48e-05	0.000249561	-1.17907	Down	0.00036118	0.00457443	-1.56428	Down	0.000422002	0.00428305	-1.03693	Down	0.000313222	0.00383888	S1 RNA binding domain containing protein.
Os03g0685300	19.9233	49.3833	21.1133	18.33	23.1633	1.30957	Up	1.48e-16	7.68e-15	-1.22587	Down	2.79e-05	0.000552833	-1.42982	Down	1.98e-12	1.6e-10	-1.09218	Down	1.42e-08	5.72e-07	Glutamine amidotransferase class-I domain containing protein.
Os07g0671901	2.53667	6.14333	0.886667	1.85	2.01667	1.27609	Up	0.000206166	0.00119822	-2.79256	Down	3.07e-06	8.51e-05	-1.7315	Down	6.39e-05	0.000899503	-1.60705	Down	6.43e-06	0.000135106	Hypothetical gene.
Os06g0553100	2.99667	6.90333	2.16333	1.69667	2.02333	1.20393	Up	7.73e-06	6.58e-05	-1.67404	Down	0.000232709	0.00321836	-2.02459	Down	2.13e-05	0.000349776	-1.77056	Down	1.02e-08	4.22e-07	Similar to Heat stress transcription factor C-2b.
Os09g0400600	4.98667	11.2167	4.40333	3.83	4.09	1.1695	Up	0.00135341	0.00610115	-1.34898	Down	0.000136185	0.00206263	-1.55023	Down	0.000491631	0.00484761	-1.45547	Down	0.00114942	0.0109499	Hypothetical protein.
Os01g0647000	66.76	146.83	31.2667	46.7967	73.1433	1.13709	Up	2.71e-06	2.61e-05	-2.23145	Down	8.01e-14	1.06e-11	-1.64967	Down	9.97e-10	4.86e-08	-1.00535	Down	1.97e-05	0.000357681	Cyclin-like F-box domain containing protein.
Os01g0867300	33.06	72.6533	24.35	25.9733	30.9933	1.13594	Up	2e-11	5.26e-10	-1.57711	Down	1.65e-18	4.12e-16	-1.484	Down	3.77e-13	3.36e-11	-1.22907	Down	6.95e-14	7.1e-12	bZIP transcription factor Abiotic stress response ABA signaling Suppressor of floral transition upon drought stress
Os04g0477025	0.763333	1.62	0.506667	0.113333	0.143333	1.08561	Up	0.00202115	0.00859694	-1.67688	Down	0.00030201	0.00396327	-3.83735	Down	8.75e-07	2.18e-05	-3.49855	Down	5.48e-11	3.54e-09	Hypothetical gene.
Os06g0661200	1.34	2.84333	0.126667	0.593333	0.933333	1.08535	Up	0.00376131	0.0145076	-4.48847	Down	5.12e-12	5.33e-10	-2.26067	Down	0.00128236	0.0106195	-1.60712	Down	0.00123846	0.0116367	Similar to B-box zinc finger family protein.
Os04g0376600	1.83667	3.87	1.58667	0.84	1.01333	1.07524	Up	0.000504425	0.00261842	-1.28633	Down	8.87e-05	0.00145511	-2.20387	Down	8.58e-07	2.14e-05	-1.93322	Down	9.99e-07	2.67e-05	Similar to ER lumen protein retaining receptor.
Os04g0689900	5.23333	10.9567	1.96	5.13333	4.58667	1.06601	Up	4.44e-05	0.000308975	-2.48288	Down	8.08e-11	6.9e-09	-1.09384	Down	3.84e-05	0.000580524	-1.25629	Down	5.25e-06	0.00011272	Similar to Pathogenesis-related protein 5 precursor (PR-5).
Os08g0457000	1.2	2.49	1	0.43	0.89	1.05311	Up	0.000244439	0.00139204	-1.31615	Down	5.92e-06	0.000149495	-2.53374	Down	1.81e-13	1.71e-11	-1.48427	Down	9.83e-05	0.00141523	Conserved hypothetical protein.
Os10g0477600	19.02	38.6667	17.0967	12.1967	14.4567	1.02357	Up	1.36e-08	2.16e-07	-1.17738	Down	0.00641343	0.0437895	-1.6646	Down	3.35e-09	1.46e-07	-1.41936	Down	0.00010472	0.00149524	Similar to NAM / CUC2-like protein.
Os03g0195800	16.7	283.547	5.17333	5.67667	15.14	4.08567	Up	0.0125435	0.0395207	-5.77635	Down	5.47e-07	1.89e-05	-5.6424	Down	4.7e-06	9.48e-05	-4.22715	Down	0.0542377	0.0204263	Similar to Sulfate transporter (Fragment).

## Sheet: Gene set D 
Table S5. Root up-regulated DEGs that did not locally or systemically respond to sulfate resupply
Gene ID	CK_R_ mean FPKM	S0_R_ mean FPKM	SR_R_ mean FPKM	SPSR_R_ mean FPKM	SPS0_R_ mean FPKM	Log2 (S0/CK)	Up/Down (S0/CK)	P_Value (S0/CK)	FDR (S0/CK)	Log2 (SR/S0)	Up/Down (SR/S0)	P_Value (SR/S0)	FDR (SR/S0)	Log2 (SPSR/S0)	Up/Down (SPSR/S0)	P_Value (SPSR/S0)	FDR (SPSR/S0)	Log2 (SPS0/S0)	Up/Down (SPS0/S0)	P_Value (SPS0/S0)	FDR (SPS0/S0)	Annotation
Os08g0549950	1.21667	4.56667	2.28	3.63333	2.87667	1.90821	Up	3.63e-07	4.31e-06	-1.00211	Down	0.00728669	0.0480125	-0.329848	--	0.383044	0.616769	-0.666743	--	0.0617553	0.222813	Hypothetical gene.
Os02g0775300	0.94	16.78	7.98	45.9867	49.8433	4.15794	Up	3.12e-18	1.91e-16	-1.07228	Down	0.00685731	0.0460287	1.45447	--	0.00631556	0.0369502	1.57066	--	0.00280398	0.0224489	Conserved hypothetical protein.
Os01g0800500	4.99333	17.3167	7.84	11.0133	11.4133	1.79409	Up	6.1e-12	1.73e-10	-1.14324	Down	0.00679926	0.0457318	-0.65291	--	0.0191775	0.0847491	-0.601441	--	0.0496326	0.192977	Purple acid phosphatase N-terminal domain containing protein.
Os01g0713800	0.103333	1.61	0.553333	0.936667	1.62	3.96168	Up	1.08e-06	1.13e-05	-1.54084	Down	0.00605118	0.0418731	-0.781453	--	0.089383	0.249329	0.00893312	--	0.895021	0.963349	Similar to RNA binding.
Os08g0506000	1.34	3.86333	1.77667	3.02	3.29	1.52761	Up	3.01e-05	0.000220161	-1.12067	Down	0.00587747	0.0409633	-0.355298	--	0.251883	0.483724	-0.231759	--	0.287659	0.574863	Ovarian tumour otubain domain containing protein.
Os07g0472900	0.21	6.12333	3.01333	5.65	10.08	4.86586	Up	5.91e-15	2.57e-13	-1.02296	Down	0.0056612	0.039813	-0.116066	--	0.73023	0.865098	0.719107	--	0.0392887	0.163322	Conserved hypothetical protein.
Os04g0593800	0.196667	0.766667	0.246667	0.4	0.466667	1.96285	Up	0.0016959	0.00738859	-1.63604	Down	0.00544154	0.0386331	-0.938599	--	0.086196	0.243439	-0.716207	--	0.200478	0.467185	Ubiquitin-conjugating enzyme/RWD-like domain containing protein.
Os02g0732600	0.02	0.873333	0.123333	0.923333	1.43	5.44846	Up	1.05e-05	8.6e-05	-2.82397	Down	0.00531524	0.0378809	0.0803192	--	0.874747	0.942669	0.711411	--	0.447566	0.721588	Similar to Typical P-type R2R3 Myb protein (Fragment).
MSTRG.27221	0.0433333	1.59	0.346667	0.93	1.76333	5.19741	Up	1.55e-05	0.000121815	-2.19741	Down	0.00527809	0.0377064	-0.773724	--	0.26554	0.499137	0.149278	--	0.879959	0.957859	--
Os07g0507500	0.14	0.68	0.28	0.946667	0.756667	2.28011	Up	3.37e-05	0.000243391	-1.28011	Down	0.00508035	0.0366632	0.477322	--	0.394763	0.626962	0.154123	--	0.830736	0.93743	Protein of unknown function DUF1723 domain containing protein.
MSTRG.2280	0.0166667	2.34667	1.15333	3.58	5.35	7.1375	Up	1.31e-18	8.36e-17	-1.0248	Down	0.00483059	0.0352452	0.609347	--	0.0286734	0.113121	1.18893	--	0.000143909	0.00197342	PREDICTED: F-box/FBD/LRR-repeat protein At5g22660 [Oryza sativa Japonica Group]
Os03g0168100	0.03	0.87	0.123333	1.53	0.846667	4.85798	Up	4.76e-05	0.000328928	-2.81845	Down	0.00454447	0.0335772	0.814444	--	0.414877	0.643757	-0.0392213	--	0.934084	0.977077	Late embryogenesis abundant protein repeat containing protein.
Os11g0303800	0.816667	14.1433	6.81	35.3467	37.7967	4.11423	Up	2.48e-35	5.25e-33	-1.0544	Down	0.00445609	0.0331132	1.32145	--	0.000524996	0.00509801	1.41814	--	3.6e-05	0.000596779	Hypothetical protein.
Os05g0486300	0.0666667	0.59	0.24	0.443333	0.386667	3.14568	Up	1.98e-06	1.97e-05	-1.29768	Down	0.00406268	0.0308401	-0.412323	--	0.397019	0.628747	-0.609625	--	0.212299	0.484495	Similar to CCR4-NOT transcription complex subunit 2.
Os09g0555550	2.62333	7.72667	2.24333	4.65333	7.53667	1.55845	Up	0.000236626	0.00135406	-1.7842	Down	0.00385594	0.0296622	-0.731582	--	0.106076	0.278269	-0.0359196	--	0.906944	0.967357	Hypothetical protein.
MSTRG.12266	0.266667	0.573333	0.196667	0.29	0.326667	1.10434	Up	0.0134643	0.0419176	-1.54362	Down	0.00323113	0.0259725	-0.983321	--	0.0785622	0.228413	-0.811555	--	0.125586	0.352502	PREDICTED: disease resistance protein RGA2 isoform X2 [Oryza sativa Japonica Group]
Os05g0542500	3.16333	7.57667	1.66667	22.85	10.2933	1.26012	Up	0.00520467	0.0190774	-2.1846	Down	0.00318855	0.0257156	1.59256	--	0.0256969	0.104381	0.442075	--	0.453638	0.725309	Similar to Isoform 2 of Late embryogenesis abundant protein group 3.
MSTRG.9768	0.596667	5.29333	2.44	8.33333	10.3167	3.14918	Up	2.84e-22	2.45e-20	-1.1173	Down	0.00307269	0.0250043	0.654717	--	0.024382	0.10063	0.962728	--	0.0110739	0.0651763	--
Os02g0627900	1.44333	3.00333	1.49	1.87	2.38667	1.05716	Up	0.00138969	0.00623126	-1.01125	Down	0.00295075	0.0242176	-0.683526	--	0.0577037	0.185129	-0.331568	--	0.279759	0.566591	Similar to cDNA clone:J013002N02 full insert sequence.
MSTRG.2513	0.453333	1.08667	0.54	0.74	1.15333	1.26127	Up	0.00343272	0.0134184	-1.00888	Down	0.00282232	0.0234218	-0.554312	--	0.220826	0.446188	0.0859001	--	0.921703	0.973541	PREDICTED: WASH complex subunit CCDC53 homolog [Oryza sativa Japonica Group]
MSTRG.17401	0.0633333	2.6	0.88	1.46667	1.73667	5.3594	Up	5.55e-08	7.8e-07	-1.56294	Down	0.00260784	0.0219601	-0.825971	--	0.122949	0.306514	-0.582191	--	0.181769	0.441151	--
Os06g0662550	0.393333	8.63	4.01333	26.7333	37.0833	4.45554	Up	1.08e-35	2.31e-33	-1.10456	Down	0.00238745	0.0204985	1.63121	--	4.54e-07	1.22e-05	2.10334	--	6.36e-12	4.66e-10	Conserved hypothetical protein.
Os01g0754800	4.34667	24.3333	9.24667	16.2133	26.24	2.48495	Up	7.65e-08	1.04e-06	-1.39593	Down	0.00237011	0.0203849	-0.585753	--	0.318336	0.553528	0.108834	--	0.929496	0.975586	Hypothetical protein.
Os05g0205400	1.85333	6.76667	1.94	6.05667	9.24	1.86832	Up	7.75e-06	6.59e-05	-1.80239	Down	0.00232961	0.0201277	-0.159921	--	0.668918	0.828503	0.449448	--	0.486367	0.748637	Conserved hypothetical protein.
Os12g0127400	0.456667	2.58	1.19667	2.62	3.85	2.49816	Up	6.39e-09	1.08e-07	-1.10835	Down	0.00218009	0.0190644	0.0221957	--	0.944272	0.974304	0.577487	--	0.170783	0.424554	Cyclin-like F-box domain containing protein.
Os01g0518400	0.136667	1.24333	0.563333	1.20667	1.89667	3.18548	Up	1.03e-13	3.77e-12	-1.14215	Down	0.0021523	0.0188658	-0.0431859	--	0.912792	0.961	0.609253	--	0.107967	0.319921	Similar to Transposon protein.
MSTRG.12687	0.0766667	0.766667	0.17	1.08	2.17333	3.32193	Up	7.67e-05	0.000501141	-2.17306	Down	0.0018308	0.0166684	0.49436	--	0.447252	0.671817	1.50324	--	0.0142466	0.0783525	--
Os07g0687900	1.17333	7.81667	3.3	26.3833	18.0733	2.73594	Up	3.24e-09	5.78e-08	-1.24409	Down	0.00157313	0.0147765	1.755	--	0.00160956	0.0127581	1.20924	--	0.00185724	0.0161283	WSI76 protein induced by water stress.
Os07g0575600	2.67333	11.0533	5.23667	7.62333	12.9667	2.04777	Up	5.55e-14	2.11e-12	-1.07776	Down	0.00148204	0.0140697	-0.535988	--	0.0690521	0.209261	0.230326	--	0.55096	0.793276	Similar to Lectin receptor-type kinase.
Os06g0147250	4.52667	93.1733	40.8567	166.803	222.55	4.3634	Up	4.45e-27	5.71e-25	-1.18935	Down	0.00144261	0.013803	0.840159	--	0.0145844	0.0692459	1.25614	--	0.00465703	0.0333484	Hypothetical conserved gene.
Os03g0120800	0.03	1.04	0.433333	0.753333	0.926667	5.11548	Up	1.15e-12	3.62e-11	-1.26303	Down	0.00141084	0.0135601	-0.465223	--	0.271653	0.506036	-0.166461	--	0.547355	0.790846	Conserved hypothetical protein.
Os04g0616800	0.5	1.58333	0.486667	1.10667	1.2	1.66297	Up	0.00805534	0.027445	-1.70196	Down	0.00136851	0.0132129	-0.516744	--	0.26458	0.498128	-0.399931	--	0.441672	0.716597	Similar to H0525G02.13 protein.
MSTRG.25949	0.233333	1.4	0.176667	1.16	0.793333	2.58496	Up	0.00379418	0.014615	-2.98633	Down	0.00136324	0.0131749	-0.271302	--	0.754492	0.880126	-0.819428	--	0.295119	0.58315	EBNA1-like protein [Oryza sativa Japonica Group]
MSTRG.21157	2.01667	4.61	2.00667	7.29333	8.85	1.19279	Up	0.000181059	0.00106721	-1.19997	Down	0.00133037	0.0129573	0.661812	--	0.0801962	0.231721	0.940911	--	0.00763134	0.0490129	--
Os11g0593100	0.243333	1.26667	0.546667	0.886667	1.29	2.38003	Up	7.82e-07	8.56e-06	-1.2123	Down	0.00130521	0.0127687	-0.514573	--	0.282081	0.517242	0.0263341	--	0.935924	0.977718	Protein of unknown function DUF295 family protein.
MSTRG.4641	0.523333	1.20333	0.463333	0.746667	0.646667	1.20123	Up	0.0029863	0.0119317	-1.37691	Down	0.00121859	0.0120721	-0.6885	--	0.257456	0.489919	-0.895942	--	0.0527409	0.200848	--
Os04g0185600	0.136667	0.473333	0.0866667	1.13667	1.62333	1.7922	Up	0.00326698	0.012865	-2.44931	Down	0.00107182	0.0109207	1.26388	--	0.0290808	0.114291	1.77803	--	0.00541087	0.0376244	General substrate transporter domain containing protein.
Os11g0533400	0.16	1.21	0.226667	2.84333	3.12	2.91886	Up	0.000510765	0.00264301	-2.41636	Down	0.00100809	0.0104223	1.23258	--	0.0309017	0.119242	1.36654	--	0.00228844	0.0190277	Conserved hypothetical protein.
MSTRG.30824	0.326667	3.07667	1.22333	2.11	2.92667	3.23548	Up	1.44e-09	2.78e-08	-1.33055	Down	0.00099349	0.010311	-0.544125	--	0.286493	0.522111	-0.0721097	--	0.718695	0.887212	--
Os09g0109600	1.56333	9.77667	4.02667	20.8667	13.7033	2.64472	Up	8.24e-11	1.97e-09	-1.27976	Down	0.000957359	0.0100163	1.09379	--	0.00119471	0.0100405	0.487112	--	0.286244	0.573762	Small peptide Drought tolerance
MSTRG.1185	2.1	4.72667	2.11333	3.97333	6.87333	1.17043	Up	0.00119209	0.00548851	-1.1613	Down	0.000860909	0.00922102	-0.250473	--	0.412219	0.641561	0.540187	--	0.109437	0.32279	--
Os11g0147200	0.44	1.23667	0.54	0.81	1.08333	1.49088	Up	0.00111254	0.00516631	-1.19543	Down	0.0008178	0.00880044	-0.610463	--	0.115428	0.294022	-0.190979	--	0.57916	0.809836	Hypothetical conserved gene.
Os11g0112400	2.14333	8.32333	4.02	4.86	6.75	1.95731	Up	5.05e-10	1.05e-08	-1.04997	Down	0.000772219	0.00838571	-0.776205	--	0.0925761	0.254948	-0.302274	--	0.44528	0.719514	Peroxidase (EC 1.11.1.7).
Os04g0633800	0.0566667	0.4	0.0733333	0.243333	0.376667	2.81943	Up	0.0018934	0.0081153	-2.44746	Down	0.000649998	0.00730352	-0.717066	--	0.286894	0.522533	-0.0867116	--	0.813518	0.930634	Protein kinase catalytic domain domain containing protein.
MSTRG.12640	1.06667	4.63667	1.55	3.51333	5.62333	2.11998	Up	3.19e-07	3.84e-06	-1.58082	Down	0.000610353	0.00696435	-0.400248	--	0.306862	0.542841	0.278338	--	0.581609	0.811533	--
Os01g0855700	0.62	3.29	0.796667	2.99	2.38	2.40775	Up	4.17e-05	0.00029254	-2.04604	Down	0.00053428	0.00627315	-0.137942	--	0.874909	0.942775	-0.467126	--	0.445554	0.719842	Hypothetical protein.
Os02g0723600	0.3	3.51	1.31	1.86333	3.04	3.54844	Up	1.45e-14	5.98e-13	-1.4219	Down	0.0005294	0.00623553	-0.913585	--	0.0519663	0.171528	-0.2074	--	0.385701	0.671536	Similar to RNA polymerase Rpb3/Rpb11 dimerisation domain containing protein expressed.
Os06g0147200	7.43	36.86	17.65	39.7	46.2767	2.31062	Up	2.31e-13	8.02e-12	-1.06239	Down	0.000511591	0.00606479	0.107083	--	0.741998	0.872842	0.328229	--	0.430642	0.708061	Conserved hypothetical protein.
Os07g0122000	3.19667	6.50333	3	3.36333	5.91667	1.02461	Up	8.11e-06	6.86e-05	-1.11622	Down	0.000414874	0.00512585	-0.951288	--	0.000269121	0.00294582	-0.136395	--	0.438376	0.714553	Protein of unknown function DUF1719 Oryza sativa family protein.
Os03g0191800	0.903333	3.57333	1.55333	2.17	2.13667	1.98394	Up	1.82e-07	2.32e-06	-1.2019	Down	0.000339402	0.00435605	-0.719575	--	0.148865	0.347072	-0.741909	--	0.0645085	0.229218	Conserved hypothetical protein.
Os04g0690600	0.563333	2.35333	1.05	2.99667	4.30333	2.06264	Up	2.44e-07	3.01e-06	-1.16432	Down	0.00033146	0.00428366	0.348653	--	0.377562	0.611434	0.870749	--	0.00858528	0.0539017	Similar to Auxin response factor 13.
Os04g0372700	3.06667	13.8967	6.41667	9.56333	17.2	2.18	Up	6.09e-15	2.64e-13	-1.11484	Down	0.000306239	0.00401346	-0.539153	--	0.0431439	0.150759	0.30767	--	0.199326	0.465695	Similar to Quinone-oxidoreductase QR1 (Fragment).
Os06g0507300	0.286667	2.47667	0.713333	5.38333	7.29333	3.11095	Up	2.07e-09	3.84e-08	-1.79575	Down	0.000290087	0.00384177	1.1201	--	0.0250529	0.102536	1.55818	--	0.000823016	0.00839104	Similar to GAMYB-binding protein.
MSTRG.1338	1.12	3.1	1.43667	2.17667	2.75333	1.46877	Up	0.000395337	0.00211668	-1.10954	Down	0.000284165	0.00378243	-0.510148	--	0.138771	0.330881	-0.171089	--	0.518554	0.771533	--
Os02g0589500	1.24	4.40333	2.11333	4.39	4.48	1.82826	Up	5.36e-06	4.75e-05	-1.05908	Down	0.000246546	0.0033675	-0.00437512	--	0.989911	0.995701	0.0249027	--	0.946154	0.981314	Hypothetical gene.
Os01g0919800	1.68333	4.25667	2.05667	6.54	9.97333	1.3384	Up	0.000268616	0.00151167	-1.04942	Down	0.000216439	0.00303709	0.619567	--	0.0669028	0.204651	1.22835	--	0.0282811	0.1296	Similar to Efflux carrier of polar auxin transport.
Os02g0149600	0.52	6.66333	3.11667	5.53667	6.59333	3.67966	Up	7.73e-47	2.63e-44	-1.09624	Down	0.00020891	0.00294392	-0.267226	--	0.341225	0.577251	-0.015236	--	0.762777	0.90768	Zinc finger C2H2-like domain containing protein.
Os01g0730100	0.233333	5.56333	2.76333	4.72667	8.52333	4.57549	Up	2.07e-31	3.58e-29	-1.00954	Down	0.000187641	0.00269004	-0.235126	--	0.37929	0.613213	0.615468	--	0.00906529	0.0560644	Cyclin-like F-box domain containing protein.
Os08g0234100	0.833333	1.83333	0.793333	1.26	1.46	1.1375	Up	0.0048924	0.0181389	-1.20847	Down	0.000134432	0.00204332	-0.541045	--	0.110584	0.286116	-0.328501	--	0.193755	0.457984	Conserved hypothetical protein.
Os11g0579900	0.426667	2.76667	1.24667	1.72667	2.67667	2.69697	Up	3.36e-11	8.52e-10	-1.15007	Down	0.000123056	0.00189827	-0.680159	--	0.0137399	0.0663933	-0.0477113	--	0.723126	0.888867	Armadillo-like helical domain containing protein.
Os07g0113600	0.0433333	0.663333	0.12	0.496667	0.64	3.93618	Up	3.65e-06	3.39e-05	-2.4667	Down	0.000105734	0.00166843	-0.417456	--	0.387889	0.621145	-0.0516621	--	0.823296	0.934618	Hypothetical conserved gene.
Os04g0603200	24.1267	54.2433	25.03	38.9067	31.0267	1.16882	Up	1.87e-05	0.000143699	-1.11579	Down	8.94e-05	0.00146401	-0.479428	--	0.194995	0.413512	-0.805937	--	0.0118192	0.0682857	Similar to C-terminal zinc-finger (Fragment).
Os01g0806300	2.87333	8.70333	3.64667	4.59333	6.78	1.59884	Up	7.78e-08	1.06e-06	-1.25499	Down	8.87e-05	0.00145476	-0.922027	--	0.0354088	0.13137	-0.360283	--	0.124158	0.349469	Conserved hypothetical protein.
Os02g0773800	2.03667	5.95667	2.58333	3.01667	6.19	1.5483	Up	1.06e-09	2.09e-08	-1.20527	Down	7.18e-05	0.00122102	-0.98155	--	0.000402683	0.00412397	0.0554342	--	0.992077	0.99708	Conserved hypothetical protein.
Os01g0267300	2.82	12.5233	5.70667	8.47667	16.6567	2.15085	Up	2.88e-11	7.4e-10	-1.1339	Down	7.1e-05	0.00121001	-0.56305	--	0.0685546	0.208269	0.411481	--	0.229011	0.507253	Hypothetical conserved gene.
Os10g0509700	1.74333	4.89667	2.21667	2.88	5.74667	1.48995	Up	5.03e-07	5.77e-06	-1.14341	Down	6.83e-05	0.00117065	-0.765731	--	0.0202537	0.0882355	0.230925	--	0.536101	0.783773	Hypothetical gene.
MSTRG.2161	2.68667	11.44	4.76333	17.9833	25.0533	2.0902	Up	1.08e-14	4.53e-13	-1.26404	Down	6.58e-05	0.0011352	0.652573	--	0.096858	0.262273	1.13092	--	3.5e-05	0.000585052	--
Os08g0377500	24.92	56.33	22.18	31.4333	35.6733	1.1766	Up	8.5e-07	9.21e-06	-1.34464	Down	6.37e-05	0.00110344	-0.841608	--	0.00314002	0.0216158	-0.659057	--	0.0302612	0.136054	Protein of unknown function DUF599 family protein.
Os06g0610600	0.933333	9.22667	3.93	5.04	8.36	3.30535	Up	3.88e-19	2.62e-17	-1.23128	Down	6.16e-05	0.0010716	-0.872386	--	0.0119104	0.0596594	-0.142307	--	0.499973	0.758881	Conserved hypothetical protein.
MSTRG.10058	0.643333	6.73667	2.79	3.82667	7.00667	3.3884	Up	8.84e-22	7.45e-20	-1.27177	Down	4.75e-05	0.000859334	-0.815947	--	0.0671542	0.205201	0.0566933	--	0.999952	0.999958	--
Os01g0776500	2.14333	6.35667	2.95333	3.30667	4.80333	1.56841	Up	1.34e-12	4.18e-11	-1.10593	Down	4.22e-05	0.000776258	-0.942893	--	0.0010148	0.00876904	-0.404235	--	0.0386876	0.161572	Peptidase cysteine/serine trypsin-like domain containing protein.
Os03g0308850	2.92667	7.33333	3.19667	4.51	5.69667	1.32521	Up	3.17e-06	3e-05	-1.1979	Down	3.51e-05	0.000666407	-0.701342	--	0.0303914	0.11779	-0.364351	--	0.139857	0.377101	Similar to Fip1 motif family protein expressed.
Os02g0714700	2.89667	6.41	2.67333	3.44	5.52	1.14593	Up	7.84e-07	8.58e-06	-1.26168	Down	3.49e-05	0.000663474	-0.897916	--	0.000231312	0.00259668	-0.215656	--	0.260319	0.54453	Hypothetical protein.
Os05g0519700	1.21	4	1.65333	4.23667	9.98667	1.72499	Up	9.5e-07	1.01e-05	-1.27462	Down	3.26e-05	0.000626221	0.0829296	--	0.836338	0.922737	1.32	--	0.00172857	0.0152278	Heat shock protein Long-term acquired thermotolerance
Os05g0179100	32.1333	66.7733	27.29	77.08	50.6533	1.0552	Up	0.00184791	0.00794898	-1.2909	Down	2.99e-05	0.000583859	0.207085	--	0.627008	0.799985	-0.398615	--	0.191663	0.455463	DVL family protein.
Os01g0885500	1.59667	5.92667	2.89333	4.85	4.88333	1.89216	Up	1.69e-11	4.52e-10	-1.03449	Down	2.7e-05	0.000538999	-0.289236	--	0.28275	0.517889	-0.279355	--	0.223253	0.499445	Hypothetical conserved gene.
Os09g0415050	0.11	5.16	1.11333	6.76	10.6167	5.5518	Up	0.000184422	0.00108387	-2.21249	Down	2.13e-05	0.000440958	0.389652	--	0.447316	0.671871	1.04089	--	0.0498921	0.193637	Hypothetical gene.
Os05g0395400	13.75	541.713	210.56	313.073	664.073	5.30003	Up	1.48e-59	7.08e-57	-1.3633	Down	1.86e-05	0.000393587	-0.791029	--	0.0300013	0.11667	0.293813	--	0.444619	0.718986	Hypothetical protein.
Os05g0102400	5.23667	18.68	5.77667	17.9967	20.37	1.83477	Up	9.15e-10	1.83e-08	-1.69319	Down	1.78e-05	0.0003795	-0.0537647	--	0.871112	0.941066	0.124952	--	0.85688	0.948883	Similar to exonuclease.
Os05g0113300	1.62667	4.19	2.08	11.9033	11.7633	1.36503	Up	2.54e-06	2.46e-05	-1.01037	Down	1.5e-05	0.000328081	1.50634	--	9.43e-09	3.72e-07	1.48927	--	2.23e-06	5.37e-05	Cation/H+ exchanger domain containing protein.
MSTRG.17585	0.316667	17.6933	8.19667	11.8233	20.9267	5.8041	Up	1.24e-38	2.99e-36	-1.1101	Down	1.44e-05	0.000317162	-0.581569	--	0.126042	0.311219	0.242137	--	0.612622	0.831635	--
MSTRG.3960	0.45	2.23	0.743333	3.01333	4.58333	2.30905	Up	3.74e-09	6.57e-08	-1.58496	Down	1.35e-05	0.000300181	0.434317	--	0.340504	0.576745	1.03935	--	0.00101798	0.009936	--
Os06g0206900	13.47	43.02	8.15	37.0367	45.9267	1.67526	Up	0.000429699	0.00227738	-2.40014	Down	1.32e-05	0.000294639	-0.216053	--	0.712523	0.854891	0.0943246	--	0.945343	0.98095	Conserved hypothetical protein.
Os03g0757600	2.76667	171.63	84.8933	105.493	176.79	5.95501	Up	1.5e-165	4.8e-162	-1.01558	Down	1.31e-05	0.000293695	-0.70215	--	0.00159241	0.0126358	0.0427349	--	0.943981	0.980407	UDP-glucuronosyl/UDP-glucosyltransferase family protein.
Os02g0222100	14.4133	35.2567	14.8333	19.82	39.2233	1.29049	Up	3.98e-06	3.66e-05	-1.24905	Down	1.23e-05	0.000278483	-0.830939	--	0.00931359	0.0495093	0.153816	--	0.782531	0.917669	Similar to Cysteine synthase (EC 4.2.99.8).
Os11g0120300	11.3133	28.4033	13.9533	36.0633	31.4333	1.32804	Up	3.41e-05	0.000245943	-1.02545	Down	1.16e-05	0.000266164	0.344473	--	0.465392	0.686343	0.146235	--	0.798803	0.924113	Protein of unknown function DUF567 family protein.
Os03g0719400	5.61333	12.9033	5.51	11.3167	10.0033	1.20081	Up	3.55e-06	3.32e-05	-1.22762	Down	1.15e-05	0.000263936	-0.189295	--	0.532656	0.737792	-0.367263	--	0.153734	0.398678	Alpha/beta hydrolase fold-1 domain containing protein.
Os05g0282900	0.56	2.66	1.02667	1.56333	2.04333	2.24793	Up	6.05e-05	0.000405819	-1.37346	Down	1.1e-05	0.000254668	-0.766801	--	0.0774362	0.226122	-0.380502	--	0.235364	0.51364	Conserved hypothetical protein.
Os10g0505900	0.0566667	0.806667	0.08	0.7	0.476667	3.8314	Up	5.07e-06	4.53e-05	-3.3339	Down	9.11e-06	0.000215374	-0.204618	--	0.832741	0.920745	-0.758992	--	0.291459	0.579252	Conserved hypothetical protein.
Os11g0149300	2.57333	5.18	2.29333	4.00333	3.74333	1.00931	Up	2.15e-05	0.000163255	-1.17551	Down	8.7e-06	0.000207303	-0.37175	--	0.137809	0.329468	-0.468629	--	0.0492185	0.191787	Hypothetical protein.
Os01g0192550	1.83667	8.33667	3.84333	6.31	8.19667	2.18238	Up	1.45e-18	9.23e-17	-1.11711	Down	8.5e-06	0.00020312	-0.401831	--	0.105619	0.277566	-0.0244333	--	0.718125	0.886918	Conserved hypothetical protein.
Os02g0612900	23.21	82.1767	36.9867	93.31	134.67	1.82398	Up	3.38e-08	4.95e-07	-1.15172	Down	7.57e-06	0.000183433	0.183303	--	0.539358	0.742191	0.712628	--	0.00844897	0.0531785	Similar to Temperature stress-induced lipocalin.
MSTRG.17556	0.983333	4.68333	1.92667	2.79	4.03333	2.25178	Up	1.41e-14	5.82e-13	-1.28143	Down	7.49e-06	0.000181556	-0.747271	--	0.0486417	0.164409	-0.215563	--	0.487128	0.749174	--
Os03g0296200	0.146667	1.57667	0.276667	1.09667	0.9	3.42626	Up	5.37e-05	0.00036504	-2.51066	Down	7.25e-06	0.000176951	-0.523753	--	0.271807	0.506135	-0.808881	--	0.107972	0.319921	Conserved hypothetical protein.
Os03g0233300	1.05333	3.79333	1.51333	2.82667	3.17667	1.8485	Up	1.09e-09	2.14e-08	-1.32574	Down	6.9e-06	0.000169578	-0.424364	--	0.242813	0.47357	-0.255952	--	0.451705	0.724277	LysM receptor-like kinase Arbuscular mycorrhizal (AM) symbiosis
Os04g0624800	0.456667	6	2.88667	3.49667	5.55	3.71575	Up	3.33e-24	3.36e-22	-1.05556	Down	5.08e-06	0.000131701	-0.778982	--	0.0049806	0.0306835	-0.112475	--	0.437678	0.713916	Aldo/keto reductase domain containing protein.
Os10g0472400	20.3633	45.3333	22.2433	31.8867	33.5433	1.1546	Up	3.34e-10	7.19e-09	-1.0272	Down	3.74e-06	0.000101068	-0.507619	--	0.026638	0.10697	-0.434546	--	0.0064083	0.0429005	Similar to Thioredoxin.
Os03g0723400	0.326667	4.62	0.616667	11.18	4.14667	3.822	Up	2.53e-09	4.59e-08	-2.90533	Down	3.61e-06	9.83e-05	1.27496	--	0.106038	0.278269	-0.155941	--	0.77371	0.913001	Similar to UFG2.
MSTRG.5585	6.18333	17.2167	8.14667	10.4	15.67	1.47735	Up	2.1e-10	4.7e-09	-1.07952	Down	1.87e-06	5.55e-05	-0.727222	--	0.00200478	0.0151364	-0.135801	--	0.450358	0.723155	--
MSTRG.19544	0.74	2.19	0.35	1.89333	1.89	1.56533	Up	2.23e-05	0.000168279	-2.6455	Down	1.74e-06	5.19e-05	-0.210002	--	0.6328	0.804097	-0.212545	--	0.474306	0.739673	--
Os05g0473401	0.116667	4.07333	1.40667	2.35667	3.61333	5.12575	Up	7.18e-32	1.28e-29	-1.53393	Down	1.64e-06	4.95e-05	-0.789462	--	0.0222822	0.0944547	-0.17288	--	0.46157	0.730706	Hypothetical conserved gene.
Os11g0582300	3.11333	9.46667	4.45	10.1767	9.59667	1.6044	Up	5.59e-19	3.68e-17	-1.08905	Down	1.52e-06	4.64e-05	0.104337	--	0.51408	0.724277	0.0196769	--	0.894619	0.963193	Similar to root hair defective 3 GTP-binding (RHD3) family protein.
Os01g0975900	155.26	383.05	145.347	844.667	1005.41	1.30285	Up	1.61e-08	2.51e-07	-1.39803	Down	1.48e-06	4.52e-05	1.14085	--	0.000140351	0.00173147	1.39218	--	3.45e-05	0.000578951	Similar to Tonoplast membrane integral protein ZmTIP1-2.
Os05g0531100	31.94	241.287	119.543	253.163	283.077	2.91731	Up	1.72e-39	4.35e-37	-1.01321	Down	1.39e-06	4.31e-05	0.0693203	--	0.759939	0.883258	0.230445	--	0.557291	0.797067	Protein of unknown function DUF584 family protein.
Os08g0153750	2.80333	25.73	5.8	18.11	21.66	3.19824	Up	1.09e-18	6.98e-17	-2.14933	Down	8.64e-07	2.81e-05	-0.506665	--	0.392098	0.624445	-0.248418	--	0.579037	0.809741	Hypothetical protein.
Os02g0767600	1.4	4.17	1.39667	4.69667	5.41667	1.57462	Up	3.94e-06	3.63e-05	-1.57806	Down	7.04e-07	2.35e-05	0.17159	--	0.495748	0.710596	0.377358	--	0.209556	0.480842	Similar to RHC1A.
Os10g0325400	5.04333	22.2933	7.40667	28.74	30.72	2.14416	Up	9.64e-11	2.28e-09	-1.58972	Down	6e-07	2.05e-05	0.366448	--	0.346498	0.582299	0.462566	--	0.3114	0.59982	Remorin C-terminal domain containing protein.
Os01g0944100	1.35	33.0333	14.3367	60.1167	80.4133	4.61289	Up	1.17e-42	3.32e-40	-1.20421	Down	4.59e-07	1.62e-05	0.863842	--	0.00121209	0.0101634	1.28351	--	3.13e-06	7.2e-05	Conserved hypothetical protein.
Os02g0327000	125.997	374.317	185.627	226.767	242.503	1.57087	Up	3.67e-15	1.64e-13	-1.01186	Down	3.74e-07	1.34e-05	-0.723051	--	6.96e-06	0.000133189	-0.626255	--	0.00034684	0.00415644	C2 domain containing protein.
Os06g0697200	0.15	4.28	1.82	5.5	5.53667	4.83458	Up	2.32e-18	1.45e-16	-1.23367	Down	3.03e-07	1.12e-05	0.361821	--	0.256792	0.489067	0.371407	--	0.272982	0.558786	DEAD-box protein abstrakt.
Os05g0484800	11.57	38.5567	11.4833	39.1967	49.1633	1.73659	Up	1.1e-09	2.15e-08	-1.74744	Down	2.21e-07	8.52e-06	0.0237506	--	0.96565	0.985513	0.350602	--	0.404354	0.685519	Protein of unknown function DUF567 family protein.
Os02g0575000	28.95	380.39	134.803	343.973	373.25	3.71584	Up	6.29e-35	1.31e-32	-1.49662	Down	1.59e-07	6.34e-06	-0.145183	--	0.774078	0.889884	-0.0273371	--	0.808877	0.929179	Conserved hypothetical protein.
Os03g0820500	10.1267	28.3533	7.65333	48.73	27.64	1.48536	Up	9.36e-06	7.77e-05	-1.88936	Down	1.54e-07	6.17e-06	0.781292	--	0.162318	0.367052	-0.0367607	--	0.833685	0.938962	Actin depolymerizing factor Actin-binding protein Abiotic stress response
Os01g0533900	21.0067	57.8433	26.0133	48.8567	71.64	1.4613	Up	2.75e-12	8.15e-11	-1.1529	Down	1.15e-07	4.73e-06	-0.243595	--	0.307343	0.543408	0.308615	--	0.407123	0.68798	Similar to Multidrug resistance protein 1 homolog.
Os05g0182600	3.29333	10.7133	4.47333	7.71667	8.43667	1.70179	Up	4.58e-19	3.06e-17	-1.25999	Down	1.14e-07	4.72e-06	-0.473358	--	0.0351906	0.13075	-0.344662	--	0.0376006	0.158511	Similar to SSRP1 protein.
Os01g0723025	0.001	5.45	2.03667	2.75333	4.65333	12.412	Up	2.63e-22	2.28e-20	-1.42005	Down	9.39e-08	3.97e-06	-0.985077	--	0.0145646	0.0691899	-0.227992	--	0.177733	0.434886	Hypothetical protein.
MSTRG.5635	0.35	29.4667	13.37	72.8267	81.4333	6.39559	Up	5.19e-88	4.61e-85	-1.14008	Down	9.34e-08	3.97e-06	1.30538	--	0.000689738	0.0063738	1.46654	--	1.31e-30	7.83e-28	--
Os12g0120100	12.5	26.6667	11.1733	25.2167	26.0833	1.09311	Up	0.000953638	0.00453848	-1.25498	Down	8.61e-08	3.68e-06	-0.0806599	--	0.915771	0.962174	-0.0319092	--	0.822873	0.934457	Protein of unknown function DUF567 family protein.
Os01g0716450	5.71333	16.6033	4.43667	16.6467	12.8033	1.53907	Up	2.45e-08	3.69e-07	-1.90392	Down	4.44e-08	2.05e-06	0.00376041	--	0.946148	0.975045	-0.374953	--	0.262547	0.546907	Hypothetical gene.
Os03g0841700	21.94	54.16	24.13	28.3567	50.7433	1.30366	Up	1.42e-09	2.73e-08	-1.1664	Down	3.16e-08	1.52e-06	-0.93354	--	9.69e-07	2.39e-05	-0.0940094	--	0.398039	0.681119	Similar to Prohibitin.
Os09g0442400	2.27667	155.703	65.19	105.577	238.35	6.09573	Up	3.07e-107	3.77e-104	-1.25608	Down	3.02e-08	1.46e-06	-0.560509	--	0.00724258	0.0409804	0.614282	--	0.00295304	0.0233621	t-snare domain containing protein.
Os06g0624900	40.7333	143.81	69.3033	132.41	150.643	1.81988	Up	1.46e-17	8.32e-16	-1.05317	Down	2.03e-08	1.03e-06	-0.119152	--	0.596764	0.779613	0.0669728	--	0.939283	0.978962	Similar to zinc-binding family protein.
Os06g0146600	4.35333	280.023	136.497	314.617	524.073	6.00728	Up	6.81e-171	3.63e-167	-1.03668	Down	1.82e-08	9.28e-07	0.168048	--	0.403231	0.633621	0.904222	--	2.1e-05	0.000377988	Hypothetical protein.
Os08g0412700	6.03667	33.2433	12.0667	22.1367	49.11	2.46124	Up	1.04e-14	4.39e-13	-1.46204	Down	1.23e-08	6.62e-07	-0.586627	--	0.0243174	0.100449	0.562952	--	0.0196884	0.0992646	Protein of unknown function DUF1262 family protein.
Os03g0806600	7.42333	28.8	13.6467	16.3	23.9233	1.95593	Up	2.68e-12	7.98e-11	-1.07752	Down	1.22e-08	6.57e-07	-0.821197	--	0.000378661	0.00392024	-0.26765	--	0.167391	0.419499	Conserved hypothetical protein.
Os06g0239700	9.87	24.52	12.11	16.1167	22.5033	1.31284	Up	2.08e-12	6.32e-11	-1.01776	Down	1.13e-08	6.11e-07	-0.605406	--	0.00502666	0.0308956	-0.12382	--	0.391525	0.676869	Conserved hypothetical protein.
Os07g0684800	41.4233	91.7967	34.9033	66.3633	77.29	1.148	Up	1.06e-06	1.12e-05	-1.39508	Down	1.07e-08	5.87e-07	-0.468055	--	0.0668045	0.204472	-0.24816	--	0.354449	0.643385	Similar to NAM / CUC2-like protein.
MSTRG.29034	4.02	9.45333	4.39	7.39333	8.16667	1.23363	Up	3.25e-07	3.9e-06	-1.1066	Down	7.5e-09	4.24e-07	-0.354598	--	0.153406	0.353896	-0.211076	--	0.380718	0.667551	--
Os05g0515900	0.89	12.2767	4.68667	7.33333	11.2933	3.78597	Up	3.49e-27	4.5e-25	-1.38928	Down	7e-09	4.01e-07	-0.743378	--	0.0228177	0.0961978	-0.120448	--	0.425183	0.704077	Similar to heat- and acid-stable phosphoprotein.
Os01g0939500	2.49	25.87	10.2067	19.9633	26.4533	3.37706	Up	5.14e-46	1.64e-43	-1.34177	Down	5.81e-09	3.36e-07	-0.373927	--	0.0602038	0.190327	0.0321695	--	0.931857	0.976437	Similar to Eukaryotic peptide chain release factor subunit 1-2 (eRF1-2) (Eukaryotic release factor 1-2) (Omnipotent suppressor protein 1 homolog 2) (SUP1 homolog 2).
Os06g0179200	7.18	17.1333	8.27667	11.5367	13.5333	1.25475	Up	4.53e-14	1.75e-12	-1.04968	Down	5.73e-09	3.34e-07	-0.570579	--	0.00774177	0.0429695	-0.340289	--	0.0994424	0.303523	Similar to Nodulin-like protein.
MSTRG.5015	2.94	60.13	21.1533	49.48	60.2367	4.3542	Up	8.63e-80	6.89e-77	-1.5072	Down	1.7e-09	1.14e-07	-0.281239	--	0.368434	0.602648	0.00255698	--	0.827727	0.93608	--
Os10g0571600	7.99333	58.6	22.98	79	74.76	2.87403	Up	1.54e-26	1.85e-24	-1.35052	Down	1.11e-09	7.83e-08	0.430952	--	0.213315	0.436807	0.351366	--	0.313606	0.601881	No apical meristem (NAM) protein domain containing protein.
Os05g0157600	1.59	11.5533	5.47	11.5767	14.1567	2.86121	Up	7.19e-48	2.7e-45	-1.0787	Down	9.82e-10	7.01e-08	0.00291076	--	0.977324	0.99035	0.293172	--	0.149944	0.392957	Hypothetical conserved gene.
Os01g0723000	1.17667	425.537	162.523	253.547	488.87	8.49843	Up	1.12e-301	1.79e-297	-1.38864	Down	2.16e-10	1.74e-08	-0.747032	--	5.96e-07	1.55e-05	0.200167	--	0.299133	0.58794	Similar to Elongation factor EF-2 (Fragment).
Os01g0292200	158.06	429.313	152.093	275.49	274.857	1.44156	Up	2.75e-15	1.24e-13	-1.49707	Down	3.13e-11	2.84e-09	-0.640031	--	0.0121842	0.0607414	-0.643352	--	0.040464	0.166617	Serine/threonine protein kinase domain containing protein.
Os02g0638650	1.26333	11.47	2.33667	6.5	9.47	3.18256	Up	9.79e-16	4.68e-14	-2.29534	Down	2.15e-11	2.02e-09	-0.819354	--	0.0337505	0.127036	-0.276429	--	0.358499	0.646811	Pathogenesis-related transcriptional factor and ERF domain containing protein.
Os03g0250000	25.78	93.0733	19.3967	76.8533	75.51	1.85212	Up	9.2e-11	2.18e-09	-2.26256	Down	1.71e-11	1.64e-09	-0.27626	--	0.486728	0.703631	-0.3017	--	0.336881	0.626263	Conserved hypothetical protein.
Os06g0216300	12.31	49.6533	17.0767	34.1867	59.6367	2.01206	Up	2.38e-23	2.24e-21	-1.53986	Down	8.9e-12	8.92e-10	-0.538457	--	0.101862	0.271081	0.264309	--	0.365105	0.653614	Similar to 12-oxophytodienoic acid reductase.
Os03g0287100	8.86667	32.3267	9.02	22.65	20.2867	1.86626	Up	2.12e-10	4.74e-09	-1.84153	Down	4.23e-12	4.47e-10	-0.513214	--	0.148356	0.346271	-0.672193	--	0.00760962	0.048915	Similar to Phosphatidylinositol transfer protein expressed.
Os05g0206100	3.50333	26.2667	5.97667	35.6833	44.9633	2.90643	Up	2.63e-25	2.86e-23	-2.13582	Down	2.44e-12	2.64e-10	0.442017	--	0.142314	0.33698	0.775516	--	0.0672424	0.235493	Conserved hypothetical protein.
Os01g0878300	15.1833	62.0133	26.0133	40.5533	52.59	2.03009	Up	4.92e-30	7.9e-28	-1.25333	Down	2.13e-12	2.33e-10	-0.612758	--	0.00736425	0.0414276	-0.23779	--	0.141349	0.379127	Protein kinase core domain containing protein.
Os01g0893400	5.50333	33.5467	7.91667	23.79	29.4833	2.60779	Up	2.45e-21	1.98e-19	-2.0832	Down	8.08e-13	9.37e-11	-0.495814	--	0.0798623	0.231074	-0.18627	--	0.438721	0.71478	Zinc finger TAZ-type domain containing protein.
Os03g0230300	11.2233	108.333	34.3833	67.24	105.847	3.2709	Up	7.56e-74	5.14e-71	-1.6557	Down	1.18e-13	1.54e-11	-0.688086	--	0.020451	0.0888292	-0.0335014	--	0.735118	0.894007	Homologue of SRO (similar to RCD one) Regulation of stomatal closure Abiotic stress response
Os01g0314800	392.46	1559.65	502.32	954.48	1203.84	1.9906	Up	1.9e-14	7.68e-13	-1.63454	Down	2.57e-14	3.77e-12	-0.708435	--	0.000553439	0.00532377	-0.373583	--	0.0373835	0.157927	Late embryogenesis abundant protein 3 family protein.
Os03g0776900	14.4	65.52	26.6867	33.4767	74.3	2.18587	Up	2.17e-26	2.59e-24	-1.29582	Down	2.45e-14	3.61e-12	-0.968779	--	2.49e-06	5.45e-05	0.181427	--	0.513067	0.767681	Similar to mitochondrial import inner membrane translocase subunit TIM14.
Os03g0283200	3.27667	21.8533	7.42333	19.29	29.6167	2.73755	Up	2.46e-22	2.14e-20	-1.55771	Down	1.15e-15	2.03e-13	-0.18	--	0.743857	0.874014	0.438556	--	0.0951318	0.295625	Similar to IN2-1 protein.
Os10g0506100	14.0733	66.7067	23.9233	50.6133	52.1033	2.24487	Up	1.1e-25	1.23e-23	-1.47941	Down	2.78e-16	5.37e-14	-0.398313	--	0.0349407	0.129986	-0.356455	--	0.0249899	0.118187	Heavy metal transport/detoxification protein domain containing protein.
Os01g0716500	6.40333	15.54	4.54333	17.4967	12.9933	1.27909	Up	1.8e-07	2.3e-06	-1.77416	Down	8.33e-17	1.75e-14	0.171094	--	0.647511	0.814702	-0.258215	--	0.407468	0.688164	Methyltransferase type 12 domain containing protein.
Os03g0242300	40.6533	110.963	27.4333	99.33	123.517	1.44864	Up	2.24e-12	6.76e-11	-2.01608	Down	2.92e-21	9.76e-19	-0.159782	--	0.48825	0.704733	0.154623	--	0.746169	0.89983	Hypothetical protein.
Os04g0111301	0.001	0.56	0.01	0.313333	0.446667	9.12928	Up	0.00338522	0.0132668	-5.80735	Down	0.00500148	0.0361994	-0.837729	--	0.538524	0.741738	-0.326228	--	0.712242	0.884125	Similar to Clavata-like kinase.
Os03g0587600	0.001	0.163333	0.01	0.0533333	0.123333	7.35168	Up	7.9e-05	0.0005147	-4.02975	Down	0.0039761	0.0303493	-1.61471	--	0.207774	0.430042	-0.405256	--	0.602232	0.82536	Zinc finger CCHC-type domain containing protein.
MSTRG.9240	0.001	1.95667	0.376667	0.73	1.03	10.9342	Up	1.1e-06	1.15e-05	-2.37704	Down	0.00141378	0.013584	-1.42243	--	0.213998	0.437588	-0.925754	--	0.116313	0.33523	PREDICTED: WAT1-related protein At5g64700-like isoform X3 [Oryza sativa Japonica Group]
Os02g0316800	0.001	0.5	0.01	0.393333	0.636667	8.96578	Up	0.000324847	0.00178044	-5.64386	Down	0.000568852	0.00659585	-0.346176	--	0.720391	0.859844	0.34861	--	0.724456	0.889343	Similar to MRNA binding protein precursor.
Os06g0252800	0.001	0.403333	0.0566667	0.0866667	0.15	8.65583	Up	4.53e-06	4.1e-05	-2.8314	Down	0.00678307	0.0456548	-2.21842	--	0.0603094	0.190477	-1.42701	--	0.032517	0.142945	Similar to STF-1 (Fragment).
Os01g0843300	0.213333	0.653333	0.173333	0.303333	0.323333	1.61471	Up	0.00136506	0.00614067	-1.91427	Down	0.00667758	0.0451275	-1.10692	--	0.0296821	0.115827	-1.0148	--	0.0383268	0.160598	Similar to Mitochondrial Rho GTPase.
MSTRG.4052	0.123333	1.65333	0.516667	0.76	0.943333	3.74474	Up	0.000166837	0.0009922	-1.67807	Down	0.00469971	0.0344931	-1.12131	--	0.0812661	0.233642	-0.809538	--	0.202859	0.470919	--
Os03g0724800	0.08	0.5	0.136667	0.116667	0.38	2.64386	Up	0.000268195	0.0015101	-1.87127	Down	0.00368219	0.0287319	-2.09954	--	0.0565076	0.182472	-0.395929	--	0.515241	0.769137	Conserved hypothetical protein.
MSTRG.33621	0.116667	2.38	0.99	0.666667	1.11	4.3505	Up	1.88e-10	4.25e-09	-1.26546	Down	0.0019785	0.0177072	-1.83592	--	0.0129048	0.0634732	-1.1004	--	0.0355968	0.152632	--
Os01g0696800	0.736667	2.01333	0.66	0.736667	1.06	1.4505	Up	0.0075027	0.025878	-1.60905	Down	0.00195055	0.0175149	-1.4505	--	0.193841	0.412123	-0.925522	--	0.392976	0.677902	Peptidase A1 domain containing protein.
MSTRG.21458	1.37667	2.87333	1.37667	1.35333	1.98	1.06155	Up	0.0135782	0.0422125	-1.06155	Down	0.00185044	0.0168138	-1.08621	--	0.0366351	0.134397	-0.537225	--	0.0917112	0.288974	--
Os08g0178500	0.05	0.956667	0.0333333	0.433333	0.11	4.25802	Up	0.00171877	0.00746786	-4.84298	Down	0.00109617	0.0110998	-1.14254	--	0.349996	0.585375	-3.12051	--	0.0374228	0.158016	Similar to H0315F07.12 protein.
Os05g0107900	2.98667	19.2067	9.47667	8.61667	13.41	2.685	Up	4.45e-18	2.68e-16	-1.01916	Down	0.000225783	0.00313862	-1.15641	--	0.0162364	0.0751137	-0.518298	--	0.0500922	0.194214	Similar to Protein DEHYDRATION-INDUCED 19 homolog 6.
MSTRG.24660	0.433333	4.77333	1.11333	2.21333	5.99	3.46145	Up	3.62e-06	3.36e-05	-2.10011	Down	0.000110938	0.001745	-1.10878	--	0.0346654	0.129341	0.327559	--	0.498681	0.758024	--
Os05g0578100	6.50333	25.4333	9.02	9.04	13.8933	1.96747	Up	8.62e-09	1.41e-07	-1.49552	Down	7.68e-05	0.001288	-1.49233	--	0.0141558	0.0677688	-0.872328	--	0.069078	0.239642	Protein of unknown function DUF1645 family protein.
Os08g0563400	2.20667	12.2433	6.07	4.82667	6.52333	2.47206	Up	1.73e-18	1.09e-16	-1.01223	Down	2.95e-05	0.000578856	-1.3429	--	0.0401958	0.143634	-0.908315	--	0.00259905	0.210992	Similar to LOB domain protein 17.
MSTRG.19004	0.0333333	1.40333	0.53	0.616667	0.753333	5.39575	Up	2.59e-18	1.61e-16	-1.40479	Down	2.82e-05	0.000557897	-1.18629	--	0.016789	0.0769325	-0.897497	--	0.000504169	0.00566001	--
MSTRG.8627	0.403333	2.90333	0.343333	0.95	1.72333	2.84767	Up	0.0080091	0.027337	-3.08003	Down	2.46e-05	0.00049892	-1.61171	--	0.0264815	0.106501	-0.752508	--	0.183604	0.444213	--
Os05g0544750	0.183333	1.69333	0.24	0.56	1.40667	3.20732	Up	0.000435055	0.00230347	-2.81876	Down	5.66e-06	0.000143941	-1.59637	--	0.031768	0.121739	-0.267585	--	0.606972	0.82827	Hypothetical protein.
Os11g0181200	0.303333	2.18333	0.173333	2.55667	0.903333	2.84756	Up	2.84e-05	0.000208737	-3.65491	Down	3.35e-06	9.21e-05	0.227732	--	0.743457	0.873732	-1.2732	--	0.0997184	0.303997	Hypothetical protein.
MSTRG.21899	0.0133333	1.75667	0.256667	0.756667	1.59333	7.04166	Up	1.76e-08	2.73e-07	-2.77487	Down	3.16e-07	1.16e-05	-1.21511	--	0.129822	0.317098	-0.140792	--	0.656119	0.857235	PREDICTED: cullin-3B-like [Oryza sativa Japonica Group]
Os02g0686800	4.33667	30.23	10.69	14.3767	15.84	2.80132	Up	9.65e-16	4.61e-14	-1.49972	Down	5.84e-12	6.04e-10	-1.07225	--	0.0373049	0.136063	-0.932409	--	0.00273568	0.0220424	Protein of unknown function DUF581 family protein.

## Sheet: Gene set E 
Table S5. Root down-regulated DEGs that locally responded to sulfate resupply
Gene ID	CK_R_ mean FPKM	S0_R_ mean FPKM	SR_R_ mean FPKM	SPSR_R_ mean FPKM	SPS0_R_ mean FPKM	Log2 (S0/CK)	Up/Down (S0/CK)	P_Value (S0/CK)	FDR (S0/CK)	Log2 (SR/S0)	Up/Down (SR/S0)	P_Value (SR/S0)	FDR (SR/S0)	Log2 (SPSR/S0)	Up/Down (SPSR/S0)	P_Value (SPSR/S0)	FDR (SPSR/S0)	Log2 (SPS0/S0)	Up/Down (SPS0/S0)	P_Value (SPS0/S0)	FDR (SPS0/S0)	Annotation
Os03g0439700	65.57	1.69333	4.18333	5.51333	2.96667	-5.2751	Down	1.33e-70	8.35e-68	1.30479	Up	0.00666305	0.0450497	1.70306	Up	1.06e-07	3.31e-06	0.808977	--	0.0416838	0.17027	Protein of unknown function DUF1230 family protein.
Os11g0138900	58.17	7.07667	22.4233	18.92	10.1667	-3.03913	Down	7.31e-48	2.71e-45	1.66386	Up	0.000155667	0.00229804	1.41877	Up	2.31e-08	8.43e-07	0.522705	--	0.0656578	0.231879	Alpha/beta hydrolase fold-3 domain containing protein.
MSTRG.5453	7.51	1.20333	3.24667	3.73667	1.94667	-2.64178	Down	5.62e-15	2.45e-13	1.43192	Up	0.00174519	0.0160733	1.63472	Up	0.00013394	0.00166917	0.69397	--	0.12028	0.342673	PREDICTED: probable WRKY transcription factor 32 [Oryza sativa Japonica Group]
Os03g0290900	9.01667	2.86667	6.67667	6.34	4.89	-1.65322	Down	5.18e-05	0.000353629	1.21975	Up	0.000434019	0.00531388	1.14511	Up	0.00241614	0.0175787	0.77046	--	0.00978861	0.0594388	Protein of unknown function DUF231 plant domain containing protein.
Os09g0255800	3.59	1.25	2.81	2.93667	1.95	-1.52206	Down	0.00151387	0.00668673	1.16864	Up	0.000345909	0.0044243	1.23225	Up	0.000368652	0.00383417	0.641546	--	0.0953231	0.296027	Hypothetical protein.
Os04g0192350	7.53333	2.66667	8.6	5.48	4.09	-1.49825	Down	1.62e-06	1.63e-05	1.6893	Up	1.18e-05	0.000268609	1.03914	Up	0.00175377	0.0136655	0.617063	--	0.260461	0.544675	Similar to H0124E07.4 protein.
Os04g0491200	5.28667	1.88333	3.86667	4.68	3.68	-1.48907	Down	1.82e-07	2.32e-06	1.0378	Up	0.00258011	0.0217854	1.31322	Up	7.79e-06	0.000146296	0.966417	--	0.00045722	0.00523015	Oligopeptide transporter domain containing protein.
Os06g0588800	1.31333	0.476667	1.16	1.04	0.893333	-1.46218	Down	0.000123482	0.00075982	1.28307	Up	5.66e-05	0.000995695	1.12553	Up	0.00349942	0.0235022	0.906218	--	0.00704042	0.046138	Protein kinase catalytic domain domain containing protein.
Os06g0206000	3.99333	1.56	4.3	4.20667	2.64333	-1.35605	Down	2.13e-05	0.000161543	1.46279	Up	2.43e-05	0.000493102	1.43113	Up	7.93e-05	0.00107778	0.760812	--	0.0444024	0.17817	Similar to carbon-nitrogen hydrolase family protein.
Os02g0689900	19.8467	7.77	17.38	23.7167	9.79	-1.35291	Down	2.31e-05	0.000173818	1.16144	Up	0.00209428	0.0184604	1.60991	Up	0.0083743	0.0456629	0.333394	--	0.556393	0.796395	TGF-beta receptor type I/II extracellular region family protein.
MSTRG.31606	0.923333	0.403333	1.70667	1.09667	0.723333	-1.19488	Down	0.00814656	0.0276967	2.08114	Up	8.45e-09	4.71e-07	1.44308	Up	0.00227532	0.0167534	0.842688	--	0.0756165	0.254945	--
Os02g0302200	4.63667	2.06	5.01333	5.87	3.19	-1.17044	Down	0.00145233	0.00646317	1.28313	Up	0.000605766	0.00692677	1.51072	Up	8.27e-05	0.00111277	0.630912	--	0.200797	0.467638	Similar to aminotransferase family protein.
Os05g0472700	27.1167	12.3333	32.25	38.2033	19.9167	-1.13662	Down	4.58e-05	0.000317481	1.38674	Up	2.93e-06	8.23e-05	1.63114	Up	4.21e-07	1.14e-05	0.691413	--	0.00260146	0.0211073	Similar to Metal transport protein.
Os07g0533300	14.0267	6.43667	19.7467	19.8167	10.5633	-1.12379	Down	0.00104374	0.00488432	1.61722	Up	0.000124811	0.0019216	1.62233	Up	3.88e-05	0.000585494	0.714679	--	0.068896	0.239369	Peptidase A1 domain containing protein.
Os02g0554900	6.93667	3.20667	6.54333	7.30667	6.07333	-1.11317	Down	1.96e-05	0.000149847	1.02895	Up	3.86e-05	0.000717568	1.18814	Up	2.08e-07	6.06e-06	0.921414	--	0.000328591	0.00398464	Similar to Protein disulfide isomerase (Fragment).
Os11g0158832	6.97	3.25333	8.04333	7.35667	5.58333	-1.09924	Down	2.26e-05	0.000170515	1.30587	Up	1.03e-06	3.3e-05	1.17713	Up	0.00133856	0.0109943	0.779208	--	0.00664795	0.0441137	Similar to Associated with HOX family protein expressed.
Os11g0158600	19.4633	9.63	20.0133	20.7433	15.8267	-1.01515	Down	4e-07	4.69e-06	1.05535	Up	5.72e-08	2.58e-06	1.10704	Up	0.00397008	0.0258777	0.71675	--	0.00723834	0.0471609	Homeodomain-like domain containing protein.
Os08g0431700	9.33333	0.77	2.96	2.33667	0.915	-3.59946	Down	2.32e-17	1.29e-15	1.94267	Up	6.6e-06	0.000163842	1.60152	Up	0.000688971	0.00636871	0.248913	--	0.0128956	0.0726422	Hypothetical protein.
Os07g0528200	2.27333	0.38	1.7	2.21333	0.593333	-2.58074	Down	1.04e-07	1.38e-06	2.16146	Up	0.000588009	0.00677051	2.54215	Up	1.04e-05	0.00018886	0.642843	--	0.00915862	0.0565259	Conserved hypothetical protein.
MSTRG.18847	2.31	0.496667	3.41333	1.61	0.525	-2.21754	Down	0.000207999	0.00120711	2.78083	Up	3.6e-08	1.69e-06	1.69671	Up	0.00487438	0.0302062	0.0800395	--	0.0854017	0.276239	--
Os01g0107400	4.28667	1.17333	5.42	4.88333	1.635	-1.86924	Down	0.00024116	0.00137607	2.20768	Up	2.31e-05	0.000472418	2.05725	Up	0.00277192	0.0196384	0.478678	--	0.0263326	0.123061	Conserved hypothetical protein.
Os08g0246100	5.16667	1.44	3.32667	4.31	1.66333	-1.84316	Down	4.01e-10	8.5e-09	1.20801	Up	0.00213448	0.0187481	1.58162	Up	0.000440449	0.00443509	0.208009	--	0.0138937	0.076784	Hypothetical conserved gene.
Os11g0115400	5.29	1.65	3.63	7.78	1.85333	-1.6808	Down	0.000401955	0.00214852	1.1375	Up	0.00676718	0.0455882	2.2373	Up	3.65e-06	7.55e-05	0.167656	--	0.0136106	0.075626	Lipid transfer protein LPT IV.
Os08g0374000	22.8233	9.21667	26.06	48.1467	9.82167	-1.30819	Down	0.000235634	0.00134887	1.49952	Up	3.97e-05	0.000736204	2.38512	Up	0.000124683	0.00157787	0.0917228	--	0.0461111	0.183008	Bet v I allergen family protein.
Os07g0673801	5.85333	2.37667	7.81333	6.91667	3.04833	-1.30032	Down	0.000669077	0.00333786	1.717	Up	0.000504166	0.00599044	1.54114	Up	0.00358285	0.0239152	0.359081	--	0.014379	0.078917	Conserved hypothetical protein.
MSTRG.7752	2.98	1.29667	4.92667	2.82	1.88	-1.2005	Down	0.00228295	0.0095291	1.9258	Up	1.55e-05	0.000337755	1.12089	Up	0.0091006	0.0486672	0.535925	--	0.0134455	0.0749752	--
Os01g0660700	0.786667	0.01	0.55	0.383333	0.0166667	-6.29768	Down	2.99e-09	5.36e-08	5.78136	Up	1.66e-07	6.6e-06	5.26053	Up	0.00127166	0.0105575	0.736966	--	0.130614	0.361177	Protein of unknown function DUF295 family protein.
Os04g0411651	2.32667	0.82	2.8	4.69	0.88	-1.50457	Down	0.00212844	0.00897919	1.77173	Up	0.000268281	0.00360322	2.51589	Up	1.01e-07	3.19e-06	0.109624	--	1.25e-06	3.28e-05	Hypothetical gene.

## Sheet: Gene set F
Table S5. Root down-regulated DEGs that systemically responded to sulfate resupply
Gene ID	CK_R_ mean FPKM	S0_R_ mean FPKM	SR_R_ mean FPKM	SPSR_R_ mean FPKM	SPS0_R_ mean FPKM	Log2 (S0/CK)	Up/Down (S0/CK)	P_Value (S0/CK)	FDR (S0/CK)	Log2 (SR/S0)	Up/Down (SR/S0)	P_Value (SR/S0)	FDR (SR/S0)	Log2 (SPSR/S0)	Up/Down (SPSR/S0)	P_Value (SPSR/S0)	FDR (SPSR/S0)	Log2 (SPS0/S0)	Up/Down (SPS0/S0)	P_Value (SPS0/S0)	FDR (SPS0/S0)	Annotation
Os08g0348300	8.33333	0.0666667	1.44333	0.0506667	1.61667	-6.96578	Down	4.66449e-14	1.7976e-12	4.4363	Up	0.00142204	0.0136413	-0.395929	--	0.200858	0.421564	4.59991	Up	0.000322104	0.00392385	Hypothetical conserved gene
MSTRG.31662	15.5033	0.183333	1.90333	0.166667	3.43333	-6.40197	Down	1.01188e-33	1.99552e-31	3.37599	Up	0.000104668	0.00165777	-0.137504	--	0.0223915	0.094795	4.22707	Up	6.27985e-07	1.7625e-05	Os08g0351700, partial [Oryza sativa Japonica Group]
Os03g0102600	4.29	1.95667	6.10667	1.87	7.07	-1.13258	Down	0.00163292	0.00714342	1.64199	Up	5.22828e-06	0.000134902	-0.0653597	--	0.00279888	0.0197913	1.85331	Up	3.73137e-10	2.05627e-08	Conserved hypothetical protein
Os08g0143600	1.08	0.143333	0.813333	0.156667	1.52	-2.91359	Down	1.02313e-05	8.39631e-05	2.50447	Up	0.000936698	0.00984855	0.128324	--	0.0133444	0.0650914	3.40663	Up	6.86212e-10	3.58528e-08	Similar to Avr9/Cf-9 rapidly elicited protein 14 (Fragment). (Os08t0143600-00) / triacylglycerol lipase like protein putative expressed
Os05g0133401	5.80667	1.75667	4.46667	1.95	6.73	-1.72487	Down	1.03407e-05	8.48397e-05	1.34636	Up	0.00299675	0.0245006	0.150634	--	0.773638	0.889692	1.93777	Up	0.000401409	0.00467856	Esterase, SGNH hydrolase-type domain containing protein. (Os05t0133401-01) / GDSL-like lipase Facylhydrolase putative expressed
MSTRG.31680	13.6	0.1	1.34667	0.106667	2.33333	-7.08746	Down	2.24495e-28	3.33588e-26	3.75132	Up	0.00251998	0.0213774	0.0931094	--	0.0777827	0.226864	4.54432	Up	4.27666e-07	1.25268e-05	Os08g0353950 [Oryza sativa Japonica Group]
Os10g0418100	1.41667	0.316667	2.22	0.506667	0.82	-2.16146	Down	2.45867e-11	6.40176e-10	2.80952	Up	4.62594e-22	1.67978e-19	0.678072	--	0.311179	0.547269	1.37266	Up	8.51933e-05	0.00124588	Calcium-transporting ATPase, Salinity stress tolerance (Os10t0418100-01)

## Sheet: Gene set G 
Table S5. Root down-regulated DEGs that locally and systemically responded to sulfate resupply
Gene ID	CK_R_ mean FPKM	S0_R_ mean FPKM	SR_R_ mean FPKM	SPSR_R_ mean FPKM	SPS0_R_ mean FPKM	Log2 (S0/CK)	Up/Down (S0/CK)	P_Value (S0/CK)	FDR (S0/CK)	Log2 (SR/S0)	Up/Down (SR/S0)	P_Value (SR/S0)	FDR (SR/S0)	Log2 (SPSR/S0)	Up/Down (SPSR/S0)	P_Value (SPSR/S0)	FDR (SPSR/S0)	Log2 (SPS0/S0)	Up/Down (SPS0/S0)	P_Value (SPS0/S0)	FDR (SPS0/S0)	Annotation
Os07g0640300	1.48	0.0166667	1.11	3.47667	2.12667	-6.47249	Down	1.33e-05	0.000106079	6.05745	Up	3.66e-05	0.000687109	7.7046	Up	2.96e-09	1.31e-07	6.99548	Up	2.12e-07	6.64e-06	Hypothetical conserved gene.
Os02g0594232	4.05333	0.1	0.713333	1.26	0.786667	-5.34104	Down	3.61e-16	1.8e-14	2.83458	Up	0.00593016	0.0412273	3.65535	Up	3.79e-05	0.000575445	2.97575	Up	0.00271651	0.0219289	Hypothetical conserved gene.
Os11g0262600	36.27	1.20667	5.85667	10.01	4.73333	-4.90968	Down	2.47e-60	1.21e-57	2.27905	Up	5.41e-05	0.000958691	3.05234	Up	3.87e-14	4.11e-12	1.97183	Up	3.72e-05	0.000614869	Conserved hypothetical protein.
Os02g0594166	23.3933	1.21	3.34667	5.39667	3.59667	-4.27302	Down	8.36e-68	4.77e-65	1.46772	Up	3.33e-05	0.000636482	2.15706	Up	9.75e-15	1.12e-12	1.57165	Up	5.5e-06	0.00011773	Conserved hypothetical protein.
Os10g0539200	4.08333	0.28	1.24333	2.29333	1.02333	-3.86625	Down	2.95e-25	3.2e-23	2.15071	Up	3.8e-06	0.000102192	3.03395	Up	1.31e-09	6.26e-08	1.86978	Up	0.00293475	0.0232555	Hypothetical conserved gene.
Os07g0418600	98.22	7.01667	40.01	161.497	74.52	-3.80716	Down	2.87e-18	1.77e-16	2.5115	Up	7.47e-12	7.59e-10	4.52457	Up	2.19e-11	1.41e-09	3.40877	Up	6.65e-11	4.22e-09	Proline-rich glycoprotein ABA-dependent inhibition of root growth
MSTRG.10553	72.7633	5.61667	49.8633	30.7633	57.0567	-3.69543	Down	2.69e-14	1.07e-12	3.15019	Up	0.000699707	0.00775381	2.45343	Up	1.7e-05	0.000287699	3.34461	Up	3.84e-07	1.14e-05	PREDICTED: metallothionein-like protein 4C isoform X2 [Oryza sativa Japonica Group]
Os07g0418700	33.83	2.97667	26.0967	95.8833	33.73	-3.50653	Down	2.54e-21	2.04e-19	3.1321	Up	9.75e-12	9.71e-10	5.00951	Up	1.03e-06	2.52e-05	3.50226	Up	2.54e-07	7.83e-06	Proline-rich glycoprotein ABA-dependent inhibition of root growth
Os07g0142700	9.57333	0.91	2.21	3.52333	4.54333	-3.39508	Down	7.3e-25	7.7e-23	1.28011	Up	0.00344155	0.0272469	1.953	Up	1.1e-06	2.67e-05	2.31981	Up	5.72e-11	3.67e-09	Transferase family protein.
Os02g0586900	13.7933	1.48333	5.56667	37.5267	17.4267	-3.21706	Down	1.33e-09	2.57e-08	1.90797	Up	0.00098756	0.0102673	4.661	Up	3.41e-14	3.65e-12	3.55438	Up	1.48e-07	4.78e-06	Hypothetical conserved gene.
Os05g0369700	3.12667	0.35	1.71	1.56667	1.58333	-3.1592	Down	3.26e-16	1.63e-14	2.28857	Up	6.46e-08	2.88e-06	2.16227	Up	9.83e-07	2.43e-05	2.17754	Up	7.18e-05	0.00107909	Exo70 exocyst complex subunit domain containing protein.
Os12g0568500	2152	242.467	719.623	514.313	552.507	-3.14982	Down	3.09e-19	2.11e-17	1.56946	Up	0.00421629	0.0317834	1.08486	Up	0.00844966	0.0459849	1.18821	Up	0.00561967	0.0387816	Metallothionein-like protein type 1.
Os12g0568350	29.6467	3.45667	10.96	7.17	8.19667	-3.10042	Down	7.43e-25	7.81e-23	1.66479	Up	0.00361801	0.0283724	1.05259	Up	0.00783426	0.043304	1.24566	Up	0.00172003	0.0151665	Hypothetical gene.
Os01g0587400	7.75333	0.983333	2.34	2.23	2.69667	-2.97906	Down	1.76e-21	1.45e-19	1.25076	Up	0.000627089	0.00712136	1.18129	Up	0.00330059	0.022487	1.45542	Up	0.000359368	0.00427434	Serine/threonine protein kinase-related domain containing protein.
MSTRG.5162	1.43	0.19	1.03667	0.82	0.813333	-2.91194	Down	5.14e-07	5.88e-06	2.44788	Up	0.000253192	0.00343308	2.10962	Up	0.00206116	0.015455	2.09785	Up	0.00221638	0.0185646	PREDICTED: probable leucine-rich repeat receptor-like protein kinase At5g49770 [Oryza sativa Japonica Group]
Os08g0560000	26.8567	4.08667	15.3067	30.95	28.4933	-2.71628	Down	7.59e-27	9.48e-25	1.90516	Up	3.96e-12	4.21e-10	2.92094	Up	1.55e-24	4.61e-22	2.80163	Up	1.66e-24	5.83e-22	Similar to gibberellin 20 oxidase 2.
MSTRG.19903	49.5567	8.19	42.2633	55.65	31.3833	-2.59714	Down	7.93e-10	1.6e-08	2.36747	Up	1.2e-09	8.34e-08	2.76445	Up	7e-06	0.000133811	1.93806	Up	0.000354594	0.00423119	--
Os04g0634400	4.94	0.853333	2.3	5.71333	4.19333	-2.53333	Down	1.06e-11	2.92e-10	1.43045	Up	0.000999764	0.0103544	2.74315	Up	4.4e-12	3.22e-10	2.29692	Up	1.34e-06	3.46e-05	Similar to H0315F07.5 protein.
Os01g0368000	2.16333	0.39	4.81333	1.72	1.11	-2.47171	Down	3.3e-08	4.85e-07	3.62549	Up	6.35e-18	1.52e-15	2.14086	Up	4.94e-05	0.000722427	1.50901	Up	0.00463411	0.0332412	Similar to cDNA clone:J023132I08 full insert sequence.
Os01g0371500	72.8133	13.3967	31.5333	41.0067	32.9967	-2.44233	Down	2.62e-46	8.54e-44	1.235	Up	1.49e-05	0.000326862	1.61398	Up	1.95e-10	1.07e-08	1.30045	Up	4.13e-13	3.78e-11	Similar to Glutathione-S-transferase 19E50.
Os07g0193000	36.1267	7.14667	14.51	24.0933	18.78	-2.33772	Down	1.5e-22	1.33e-20	1.02171	Up	0.000425606	0.00523455	1.75329	Up	3.3e-13	2.98e-11	1.39385	Up	3.62e-07	1.08e-05	HIPL1 protein precursor.
Os06g0718400	39.9733	8.58333	23.2467	33.7033	27.9233	-2.21943	Down	5.03e-13	1.66e-11	1.43741	Up	8.74e-05	0.00143731	1.97328	Up	3.65e-10	1.93e-08	1.70186	Up	1.18e-08	4.82e-07	Hypothetical conserved gene.
Os05g0565400	7.1	1.53	5.93	6.84333	5.18667	-2.21429	Down	3.59e-10	7.68e-09	1.9545	Up	9.77e-07	3.14e-05	2.16117	Up	7.5e-07	1.91e-05	1.76128	Up	9.81e-07	2.63e-05	Protein of unknown function DUF561 family protein.
Os01g0924200	8.45667	1.83667	5.22333	7.83	5.18667	-2.203	Down	4.73e-09	8.21e-08	1.50788	Up	0.000429531	0.00527194	2.09192	Up	7.2e-06	0.000136942	1.49772	Up	0.00506756	0.0357142	Conserved hypothetical protein.
Os12g0156866	1.47	0.323333	0.953333	2	1.44333	-2.18472	Down	7.92e-07	8.66e-06	1.55996	Up	0.00354194	0.0278866	2.62891	Up	3.62e-12	2.72e-10	2.15831	Up	2.5e-05	0.000437832	Similar to Amino acid permease family protein expressed.
Os06g0721800	57.3967	13.5667	36.9967	51.95	45.01	-2.0809	Down	3.98e-09	6.94e-08	1.44733	Up	5.52e-05	0.000975156	1.93706	Up	3.22e-10	1.71e-08	1.73018	Up	8.92e-08	3e-06	Cupredoxin domain containing protein.
Os09g0431300	13.5567	3.26333	6.66	8.7	9.32	-2.05458	Down	3.6e-11	9.08e-10	1.02918	Up	0.000734972	0.00805763	1.41467	Up	7.02e-07	1.8e-05	1.51398	Up	2.76e-06	6.47e-05	Similar to MYB transcription factor MYB71 (Fragment).
Os07g0642200	34.5667	8.45	36.18	44.02	38.2	-2.03236	Down	5.96e-21	4.6e-19	2.09817	Up	1.18e-11	1.15e-09	2.38114	Up	4.54e-27	1.63e-24	2.17655	Up	4.5e-22	1.33e-19	Lipase GDSL domain containing protein.
Os02g0745100	376.443	94.6867	297.84	321.26	230.43	-1.9912	Down	1.33e-14	5.51e-13	1.6533	Up	8.69e-08	3.71e-06	1.76251	Up	2.41e-19	4.66e-17	1.2831	Up	1.04e-14	1.18e-12	Aquaporin NIP III subfamily protein Aquaporin Silicon influx transporter Arsenic species (As) uptake Arsenite efflux Selenite (Se) uptake Water transport
Os01g0695100	13.54	3.54	14.8967	9.60667	8.68333	-1.93541	Down	9.9e-07	1.05e-05	2.07317	Up	1.39e-17	3.22e-15	1.44029	Up	0.00067953	0.00629131	1.2945	Up	0.000199243	0.00262519	Similar to Phosphoethanolamine N-methyltransferase.
Os03g0797400	1.73	0.456667	1.73667	2.44667	1.68333	-1.92156	Down	0.000743313	0.00365663	1.92711	Up	0.000457596	0.00552713	2.4216	Up	1.87e-05	0.000313515	1.88211	Up	0.00373087	0.028041	Similar to Indole-3-glycerol phosphate lyase.
Os04g0365100	4.85667	1.28667	3.24	3.87	3.07667	-1.91633	Down	2.98e-07	3.61e-06	1.33236	Up	0.004251	0.0319964	1.5887	Up	0.00112467	0.00956395	1.25773	Up	0.00400429	0.0295951	Similar to OSIGBa0135K14.8 protein.
Os01g0831250	5.31	1.45	3.71333	6.79333	7.88333	-1.87266	Down	2.49e-09	4.53e-08	1.35666	Up	1.47e-05	0.000324081	2.22807	Up	3.94e-13	3.5e-11	2.44275	Up	9.34e-14	9.31e-12	Hypothetical gene.
Os05g0424300	17.3433	4.79667	15.5167	27.85	24.25	-1.85428	Down	2.3e-10	5.13e-09	1.69371	Up	2.14e-07	8.27e-06	2.53757	Up	1.53e-12	1.25e-10	2.33788	Up	4.32e-10	2.35e-08	Cytochrome P450 family protein.
Os06g0271300	1.77667	0.506667	1.77667	1.93333	1.88	-1.81006	Down	4.08e-05	0.000287535	1.81006	Up	4.53e-05	0.000825798	1.93198	Up	8.24e-05	0.00111116	1.89162	Up	3.37e-05	0.000566519	Similar to OSIGBa0140C02.5 protein.
Os05g0366000	0.9	0.266667	1.06667	1.82333	2.07	-1.75489	Down	0.0160759	0.0484155	2	Up	0.00339081	0.0269383	2.77347	Up	1.64e-05	0.000280791	2.95652	Up	5.68e-06	0.000120962	Beta-glucosidase 21.
Os08g0254600	5.05	1.50667	3.17333	5.37667	3.44	-1.74492	Down	3.99e-11	9.99e-10	1.07464	Up	0.000192359	0.00274314	1.83535	Up	1.23e-08	4.79e-07	1.19105	Up	0.00326612	0.0252578	Similar to cyclic nucleotide-gated ion channel 14.
Os03g0850900	65.5533	19.6433	41.3433	100.743	75.75	-1.73863	Down	9.55e-05	0.000608673	1.07361	Up	0.000581588	0.00671737	2.35857	Up	0.00094526	0.00828243	1.94721	Up	0.00160194	0.0142663	Similar to Chemocyanin precursor (Basic blue protein) (Plantacyanin).
MSTRG.12314	13.39	4.03	8.88	16.7467	12.7	-1.7323	Down	3.99e-07	4.68e-06	1.13978	Up	0.00378536	0.0293038	2.05502	Up	2.08e-08	7.67e-07	1.65598	Up	0.000121076	0.00170341	--
Os02g0562100	1.26667	0.383333	1.40333	1.57333	1.70333	-1.72437	Down	0.00998642	0.0327664	1.87219	Up	0.00423872	0.0319363	2.03715	Up	0.00190967	0.0145754	2.15169	Up	0.00288728	0.0229488	DNA repair and recombination RecA-like domain containing protein.
Os04g0176200	9.05667	2.77333	8.48333	11.3633	7.17333	-1.70736	Down	1.43e-05	0.000113566	1.61301	Up	0.000497735	0.00593297	2.03469	Up	4.04e-07	1.1e-05	1.37102	Up	0.00427821	0.0311555	Similar to N-methyltransferase.
Os05g0160300	274.097	84.35	197.377	423.84	294.107	-1.70022	Down	6.56e-06	5.7e-05	1.22649	Up	4.47e-05	0.000815849	2.32906	Up	2.61e-05	0.000417281	1.80188	Up	0.000209846	0.00274216	Bifunctional inhibitor/plant lipid transfer protein/seed storage domain containing protein.
Os07g0631900	11.3133	3.67667	16.44	8.00667	9.87667	-1.62155	Down	7.97e-07	8.7e-06	2.16074	Up	8.75e-12	8.8e-10	1.1228	Up	0.0046294	0.0291138	1.42563	Up	0.000126684	0.00177446	Nucleotide-binding alpha-beta plait domain containing protein.
Os04g0180900	4.54667	1.51333	8.21	6.04	4.66	-1.58708	Down	2.47e-06	2.39e-05	2.43965	Up	1.23e-11	1.2e-09	1.99682	Up	3.75e-10	1.97e-08	1.6226	Up	1.41e-06	3.62e-05	Conserved hypothetical protein.
Os06g0210900	3.80333	1.27	4.09333	2.87333	3.60667	-1.58244	Down	7.31e-06	6.27e-05	1.68845	Up	6.96e-05	0.00119149	1.1779	Up	0.00263802	0.0188511	1.50584	Up	0.000227235	0.0029351	Lipase class 3 family protein.
Os01g0831300	4.40333	1.47333	3.39	6.31	7.58333	-1.57951	Down	9.13e-06	7.6e-05	1.2022	Up	0.0013971	0.0134498	2.09856	Up	4.23e-07	1.14e-05	2.36375	Up	3.48e-11	2.31e-09	Similar to Ammonium transporter.
Os08g0278900	24.9267	8.37667	35.7433	30.0267	24.1233	-1.57324	Down	2.64e-12	7.86e-11	2.09323	Up	4.12e-22	1.51e-19	1.8418	Up	6.81e-24	1.93e-21	1.52598	Up	2.16e-13	2.05e-11	MIR domain containing protein.
Os07g0520100	11.81	3.97667	8.04667	16.5933	10.4467	-1.57038	Down	3e-14	1.18e-12	1.01683	Up	8.42e-05	0.00139554	2.06097	Up	8.13e-34	5.2e-31	1.39341	Up	4.85e-08	1.73e-06	Similar to taxane 10-beta-hydroxylase.
Os07g0187000	1.5	0.513333	1.2	1.54667	1.38	-1.54699	Down	0.00050765	0.002632	1.22507	Up	0.00626519	0.0429943	1.59119	Up	1.09e-05	0.000197762	1.4267	Up	9.32e-05	0.00135091	Conserved hypothetical protein.
Os08g0245200	22	7.55	18.5833	20.4733	21.6567	-1.54295	Down	3.28e-09	5.83e-08	1.29946	Up	5.26e-06	0.000135514	1.4392	Up	9.96e-08	3.15e-06	1.52026	Up	2.3e-09	1.09e-07	4-coumarate:coenzyme A ligase Lignin biosynthesis
Os03g0238300	12.79	4.39667	17.3433	30.33	20.36	-1.54053	Down	1.15e-12	3.62e-11	1.9799	Up	9.94e-21	3.08e-18	2.78626	Up	1.05e-40	1.03e-37	2.21126	Up	6.81e-25	2.45e-22	Endonuclease/exonuclease/phosphatase domain containing protein.
Os09g0517900	4.28667	1.49667	18.48	8.21333	7.82333	-1.5181	Down	2.17e-07	2.7e-06	3.62614	Up	4.82e-23	2.05e-20	2.45621	Up	2.99e-12	2.29e-10	2.38603	Up	9.03e-14	9.03e-12	UDP-glucuronosyl/UDP-glucosyltransferase family protein.
Os06g0564700	3.31	1.09	3.48667	2.35333	2.84667	-1.6025	Down	3.66e-07	4.34e-06	1.67752	Up	1.98e-05	0.000415448	1.11038	Up	0.00758132	0.0422908	1.38495	Up	0.0810755	0.267413	Similar to Cysteine synthase (EC 4.2.99.8).
Os02g0115900	166.22	58.6033	166.24	165.203	120.733	-1.50404	Down	2.88e-13	9.88e-12	1.50421	Up	2.58e-15	4.32e-13	1.49519	Up	5.17e-08	1.74e-06	1.04277	Up	2.11e-09	1.01e-07	Endosperm lumenal binding protein.
Os10g0159800	71.5267	25.38	57.8233	112.073	84.2433	-1.49479	Down	5.34e-06	4.74e-05	1.18796	Up	0.000972804	0.0101351	2.14268	Up	1.72e-10	9.64e-09	1.73087	Up	2.8e-06	6.55e-05	Alcohol dehydrogenase superfamily zinc-containing protein.
Os03g0802600	13.6467	4.87667	22.5533	31.0333	22.33	-1.48458	Down	0.00010102	0.000637952	2.20937	Up	5.48e-14	7.52e-12	2.66985	Up	7.23e-14	7.26e-12	2.19502	Up	5.39e-09	2.34e-07	ATPase AAA-type core domain containing protein.
Os01g0872000	0.596667	0.213333	1.84667	1.14	1.38	-1.48382	Down	0.0142688	0.0439214	3.11374	Up	2.55e-10	2.03e-08	2.41785	Up	3.77e-05	0.000572704	2.69349	Up	1.08e-07	3.59e-06	TGF-beta receptor type I/II extracellular region family protein.
Os10g0543500	16.12	5.79667	16.56	16.8367	15.0733	-1.47556	Down	4.56e-07	5.27e-06	1.51441	Up	4.66e-07	1.63e-05	1.53831	Up	2.65e-07	7.53e-06	1.3787	Up	1.46e-06	3.75e-05	Six-bladed beta-propeller TolB-like domain containing protein.
Os03g0724300	5.36333	1.94333	6.18333	6.83	6.57667	-1.4646	Down	1.03e-08	1.67e-07	1.66985	Up	3.44e-14	4.85e-12	1.81335	Up	3.11e-21	7.15e-19	1.75882	Up	2.34e-12	1.82e-10	Tyrosine protein kinase domain containing protein.
Os07g0182900	2.46	0.896667	3.58333	2.22	1.99333	-1.45601	Down	0.000190535	0.00111713	1.99866	Up	4.79e-15	7.74e-13	1.30792	Up	0.00251052	0.0181428	1.15254	Up	1.49e-06	3.79e-05	DNA methyltransferase Maintenance of methylation Gene silencing
Os01g0891700	1.29	0.486667	1.62	1.4	1.60667	-1.40637	Down	0.0011943	0.00549713	1.73499	Up	0.000466873	0.00561681	1.52442	Up	0.0015564	0.0124002	1.72306	Up	3.24e-05	0.000547632	Leucine-rich repeat N-terminal domain containing protein.
Os10g0522000	13.29	5.08	14.2933	11.7467	11.2767	-1.38744	Down	1.56e-05	0.000122214	1.49244	Up	5.02e-05	0.000900981	1.20935	Up	0.00119555	0.0100447	1.15044	Up	0.00118252	0.0111981	Similar to Methyltransferase family protein expressed.
Os09g0543400	8.26	3.26333	10.8367	11.0933	15.98	-1.3398	Down	5.2e-05	0.000354764	1.7315	Up	7.45e-08	3.25e-06	1.76527	Up	1.7e-10	9.55e-09	2.29185	Up	2.98e-08	1.12e-06	Ornithine decarboxylase (EC 4.1.1.17).
Os03g0832200	2.64	1.05667	9.46333	10.8133	6.17667	-1.32102	Down	2.41e-05	0.000180335	3.16283	Up	5e-24	2.29e-21	3.35522	Up	6.19e-37	4.92e-34	2.54731	Up	1.39e-11	9.74e-10	Similar to Calcium-binding protein precursor (Calreticulin).
Os01g0717700	28.6	11.4833	40.2267	38.6167	23.4067	-1.31647	Down	4.2e-12	1.22e-10	1.80861	Up	9.01e-24	4.06e-21	1.74968	Up	2.39e-15	2.99e-13	1.02738	Up	6.3e-05	0.000962479	EGF-like alliinase domain containing protein.
Os11g0615800	2.71	1.11	3.15333	3.41	3.46667	-1.28773	Down	0.000749757	0.00368228	1.50632	Up	3e-05	0.000586131	1.61921	Up	8.91e-06	0.000165568	1.64299	Up	1.84e-05	0.000336959	DNA repair protein RAD51 Homologous pairing
Os09g0541100	6.19333	2.54667	6.18333	6.74667	6.39	-1.28211	Down	0.000967029	0.0045858	1.27977	Up	0.00711796	0.0472247	1.40556	Up	0.000277397	0.00302531	1.32721	Up	0.000773949	0.00797424	Cupredoxin domain containing protein.
Os01g0102900	7.95	3.34333	29.74	8.61	9.06	-1.24967	Down	0.00323592	0.0127625	3.15305	Up	1.29e-18	3.25e-16	1.36473	Up	0.00241426	0.0175742	1.43822	Up	8.21e-05	0.00121017	Light-regulated protein Regulation of light-dependent attachment of LEAF-TYPE FERREDOXIN-NADP+ OXIDOREDUCTASE (LFNR) to the thylakoid membrane
Os02g0828500	2.05	0.9	2.98333	3.53333	3.81333	-1.18763	Down	0.00109547	0.00509435	1.72893	Up	7.7e-06	0.000186324	1.97303	Up	1.91e-09	8.79e-08	2.08306	Up	1.94e-09	9.37e-08	Tetratricopeptide-like helical domain containing protein.
Os12g0191300	3.50667	1.56	3.87	4.01	5.54333	-1.16855	Down	0.00790642	0.027053	1.31079	Up	0.00667726	0.0451275	1.36206	Up	0.00253388	0.0182541	1.82921	Up	2.46e-05	0.000431867	Similar to Phage head-tail adaptor family protein expressed.
Os07g0663500	7.05667	3.21333	12.8833	12	13.85	-1.13492	Down	0.00010757	0.000673721	2.00336	Up	2.76e-05	0.00054758	1.90089	Up	8.38e-08	2.68e-06	2.10774	Up	3.03e-09	1.39e-07	Similar to Short-chain dehydrogenase/reductase (Fragment).
Os02g0454500	4.05667	1.89333	4.57333	6.88333	7.40333	-1.09937	Down	9.79e-05	0.000621732	1.27232	Up	1.34e-05	0.000298512	1.86218	Up	3.3e-10	1.75e-08	1.96725	Up	4.61e-13	4.15e-11	Membrane bound O-acyl transferase MBOAT family protein.
Os03g0411300	33.2667	15.5267	207.087	64.0767	59.2933	-1.09933	Down	0.000681527	0.00339097	3.73741	Up	1.32e-35	1.23e-32	2.04505	Up	1.95e-07	5.75e-06	1.93312	Up	1.06e-08	4.35e-07	EF-Hand type domain containing protein.
Os08g0344600	39.4467	18.5333	40.98	39.3167	43.76	-1.08978	Down	2.59e-06	2.5e-05	1.1448	Up	3.05e-07	1.13e-05	1.08502	Up	1.24e-06	2.95e-05	1.23949	Up	1.56e-06	3.95e-05	Similar to Triose phosphate/phosphate translocator non-green plastid chloroplast precursor (CTPT).
Os07g0529600	10.1767	4.79	400.657	412.273	311.183	-1.08717	Down	0.00419405	0.0159116	6.3862	Up	1.96e-106	5.82e-102	6.42743	Up	4.76e-85	3.5e-81	6.0216	Up	7.72e-42	1.11e-38	Similar to Thiazole biosynthetic enzyme 1-1 chloroplast precursor.
Os03g0375966	19.13	9.16667	20.83	21.1867	27.6867	-1.06137	Down	0.00116765	0.0053853	1.18419	Up	0.0036714	0.0286707	1.20869	Up	0.00750106	0.041919	1.59472	Up	0.000204108	0.0026846	Similar to Amino acid permease family protein.
Os02g0117200	16.7667	8.04	18.64	16.5833	17.5133	-1.06033	Down	2.41e-05	0.000180335	1.21313	Up	6.19e-10	4.63e-08	1.04447	Up	1.34e-05	0.000235741	1.12319	Up	1.21e-09	6.14e-08	Similar to MIR-interacting saposin-like protein.
Os09g0344800	19.39	9.31333	30.7867	30.5433	34.56	-1.05794	Down	0.000259284	0.00146535	1.72494	Up	1.98e-20	5.83e-18	1.71349	Up	3.91e-15	4.77e-13	1.89173	Up	2.3e-18	3.99e-16	Protein of unknown function DUF81 family protein.
Os03g0130300	129.717	62.8	140.87	513.893	335.9	-1.04653	Down	0.00364912	0.0141329	1.16553	Up	1.11e-05	0.000255411	3.03263	Up	4.39e-25	1.36e-22	2.4192	Up	6.89e-24	2.29e-21	Similar to Cp-thionin.
MSTRG.31415	2.62333	1.28667	3.72	3.51667	2.88667	-1.02776	Down	0.00632934	0.0224978	1.53166	Up	3.39e-07	1.23e-05	1.45057	Up	1.2e-06	2.88e-05	1.16577	Up	0.000247677	0.00314931	--
Os03g0179900	12.84	6.32333	25.6367	14.3067	16.1	-1.02189	Down	0.00178946	0.0077382	2.01945	Up	6.59e-11	5.75e-09	1.17793	Up	0.00182741	0.0140938	1.3483	Up	0.000173869	0.00232846	Similar to Avr9/Cf-9 rapidly elicited protein 44 (Fragment).
Os12g0238000	2.05667	1.02333	2.29667	2.41333	2.27333	-1.00703	Down	0.00663131	0.0233683	1.16627	Up	0.00017774	0.00256889	1.23775	Up	0.00145391	0.0117426	1.15153	Up	0.000595049	0.00644082	SANT domain DNA binding domain containing protein.
Os07g0598800	0.333333	0.01	0.11	0.2	0.153333	-5.05889	Down	2.16e-06	2.12e-05	3.45943	Up	0.00431359	0.0323258	4.32193	Up	0.00156313	0.0124437	3.9386	Up	0.00293884	0.0232817	Hypothetical conserved gene.
MSTRG.31683	6.48333	0.01	0.79	0.573333	0.923333	-9.34059	Down	7.78e-15	3.35e-13	6.30378	Up	0.00260987	0.021971	5.8413	Up	0.00170857	0.0133942	6.52878	Up	0.000105207	0.00150007	--
MSTRG.31668	13.9567	0.01	0.89	0.83	1.51333	-10.4467	Down	1.51e-17	8.56e-16	6.47573	Up	0.00204773	0.0181161	6.37504	Up	0.000280709	0.00305674	7.24159	Up	4.59e-07	1.33e-05	--

## Sheet: Gene set H
Table S5. Root down-regulated DEGs that did not locally or systemically respond to sulfate resupply
Gene ID	CK_R_ mean FPKM	S0_R_ mean FPKM	SR_R_ mean FPKM	SPSR_R_ mean FPKM	SPS0_R_ mean FPKM	Log2 (S0/CK)	Up/Down (S0/CK)	P_Value (S0/CK)	FDR (S0/CK)	Log2 (SR/S0)	Up/Down (SR/S0)	P_Value (SR/S0)	FDR (SR/S0)	Log2 (SPSR/S0)	Up/Down (SPSR/S0)	P_Value (SPSR/S0)	FDR (SPSR/S0)	Log2 (SPS0/S0)	Up/Down (SPS0/S0)	P_Value (SPS0/S0)	FDR (SPS0/S0)	Annotation
Os04g0554500	112.627	0.69	24.12	0.133333	0.26	-7.35074	Down	1.75e-18	1.1e-16	5.12749	Up	8.31e-14	1.1e-11	-2.37156	--	0.170933	0.379846	-1.40808	--	0.424226	0.70368	Similar to RCc3 protein.
Os01g0647200	50.0133	0.73	2.00333	0.543333	0.3	-6.09827	Down	2.37e-75	1.68e-72	1.45643	Up	0.00126186	0.012404	-0.426059	--	0.490564	0.706321	-1.28293	--	0.016997	0.0892174	Hypothetical conserved gene.
Os02g0503700	0.676667	0.0133333	1.09	0.02	0.02	-5.66534	Down	1.82e-05	0.000140208	6.35315	Up	1.14e-09	8.04e-08	0.584963	--	0.86599	1	0.584963	--	0.921091	1	Similar to Cytochrome P450 CYP81L6.
Os02g0731900	7.24	0.143333	1.40667	0.0533333	0.0966667	-5.65854	Down	2.08e-52	8.87e-50	3.29483	Up	0.000893849	0.00947786	-1.42626	--	0.253769	0.485668	-0.568284	--	0.557305	0.797067	Similar to 3-ketoacyl-CoA synthase.
Os04g0308600	6.69	0.133333	8.11	0.0233333	0.18	-5.6489	Down	1.94e-05	0.000148522	5.92659	Up	8.6e-20	2.44e-17	-2.51457	--	0.188187	0.403956	0.432959	--	0.827405	0.935955	Similar to H0211A12.11 protein.
Os03g0307300	1255.45	25.0633	397.967	0.276667	0.12	-5.64649	Down	3.87e-76	2.88e-73	3.989	Up	0.00359131	0.0282075	-6.50129	--	6.5e-29	2.77e-26	-7.7064	--	1.39e-52	3.5e-49	Nicotianamine synthase 1 (EC 2.5.1.43) (S-adenosyl-L-methionine:S- adenosyl-L-methionine:S-adenosyl-methionine 3-amino-3- carboxypropyltransferase 1)
Os03g0836800	46.4567	1.12667	42.03	0.0866667	0.0166667	-5.36575	Down	9.59e-24	9.37e-22	5.22129	Up	7.05e-26	4.04e-23	-3.70044	--	0.00303305	0.0210542	-6.07895	--	1.27e-06	3.31e-05	Similar to IAA-amino acid hydrolase 1 (EC 3.5.1.-).
Os03g0155900	8.35333	0.21	5.22	0.0733333	0.15	-5.31389	Down	9.45e-18	5.53e-16	4.63559	Up	0.00197746	0.0177032	-1.51785	--	0.569759	0.762174	-0.485427	--	0.833714	0.938962	Alpha-expansin OsEXPA18.
Os03g0258900	18.0967	0.47	2.43	0.0233333	0.04	-5.26692	Down	4.29e-29	6.52e-27	2.37022	Up	0.000436602	0.00533672	-4.3322	--	0.00186006	0.0143006	-3.55459	--	0.0132044	0.0739128	Galactose oxidase beta-propeller domain containing protein.
Os01g0264600	1.60333	0.0433333	0.406667	0.0333333	0.02	-5.20945	Down	1.79e-12	5.48e-11	3.2303	Up	0.00368812	0.0287631	-0.378512	--	0.864767	1	-1.11548	--	0.676865	1	Conserved hypothetical protein.
Os04g0629200	40.4933	1.16667	4.74667	0.12	0.123333	-5.11722	Down	2.31e-52	9.7e-50	2.02452	Up	0.00456423	0.033673	-3.28129	--	0.0138831	0.0668548	-3.24176	--	0.019444	0.0983073	Cupredoxin domain containing protein.
Os01g0952800	176.343	5.23667	15.0867	2.23333	1.36667	-5.07359	Down	7.3e-75	5.07e-72	1.52655	Up	0.00415935	0.0314337	-1.22945	--	0.00562474	0.0337748	-1.93799	--	2.75e-08	1.04e-06	Achaete-scute transcription factor related domain containing protein.
Os01g0127600	786.56	25.2733	386.18	7.67333	21.83	-4.95987	Down	1.51e-09	2.88e-08	3.93359	Up	1.53e-05	0.000334797	-1.71969	--	1	1	-0.211304	--	0.880533	0.958204	Similar to Bowman-Birk type proteinase inhibitor D-II precursor (IV).
Os10g0552300	92.7133	3.09333	52.33	0.223333	3.14	-4.90554	Down	5.47e-07	6.23e-06	4.0804	Up	6.7e-05	0.00115292	-3.79189	--	0.00101613	0.00877535	0.0216023	--	0.971097	0.989946	Conserved hypothetical protein.
Os06g0180100	6.12	0.223333	2.31	0.0966667	0.363333	-4.77626	Down	2.21e-11	5.77e-10	3.37062	Up	0.00161979	0.0151526	-1.20811	--	0.663374	1	0.702095	--	0.753678	0.903582	Hypothetical conserved gene.
Os09g0417600	54.0233	2.06	8.34667	1.5	2.27333	-4.71287	Down	2.43e-33	4.71e-31	2.01856	Up	0.000350244	0.00446441	-0.457682	--	0.621596	0.796499	0.142165	--	0.897188	0.963892	WRKY transcription factor Transcriptional repressor Pathogen defense
Os01g0508500	33.2433	1.27667	4.29667	0.72	0.636667	-4.70261	Down	3.66e-47	1.27e-44	1.75084	Up	0.00174582	0.0160741	-0.826313	--	0.234788	0.463359	-1.00377	--	0.0711353	0.244671	Conserved hypothetical protein.
Os01g0868600	12.23	0.476667	5.49333	0.0366667	0.756667	-4.6813	Down	1.1e-27	1.5e-25	3.52663	Up	8.07e-11	6.9e-09	-3.70044	--	0.000627376	0.00591017	0.666677	--	0.507065	0.763658	Hypothetical conserved gene.
Os05g0499300	225.11	8.98333	82.64	0.123333	1.73667	-4.64724	Down	3.3e-07	3.96e-06	3.20152	Up	1.85e-08	9.41e-07	-6.18662	--	1.47e-05	0.000256378	-2.37093	--	1	1	Similar to Peroxidase (EC 1.11.1.7).
Os01g0294500	24.6833	1.02	8.15333	0.143333	0.0633333	-4.5969	Down	7.74e-19	5e-17	2.99882	Up	1.7e-05	0.000364087	-2.83112	--	0.00147947	0.0119131	-4.00946	--	0.000197964	0.00260947	Similar to Class III peroxidase 9.
Os10g0551800	99.2	4.10667	24.2633	0.373333	0.566667	-4.5943	Down	7.12e-23	6.56e-21	2.56274	Up	4.65e-05	0.000843394	-3.45943	--	0.00158092	0.0125717	-2.8574	--	0.000443808	0.00509022	Root-specific protein (RCc2 protein).
Os11g0505300	9.43667	0.393333	3.50667	0.04	0.0266667	-4.58445	Down	2.22e-17	1.24e-15	3.15628	Up	0.00105234	0.0107605	-3.29768	--	0.0499009	0.167216	-3.88264	--	0.0156877	0.0841183	Sulfotransferase Resistance to rice stripe virus
Os08g0302000	4.32333	0.183333	1.01667	0.32	0.34	-4.5596	Down	4.91e-11	1.22e-09	2.47131	Up	0.00708098	0.0470422	0.803603	--	0.519663	0.728445	0.891066	--	0.432786	0.709616	Similar to Peroxidase 40 precursor (EC 1.11.1.7) (Atperox P40).
Os04g0309900	10.6433	0.453333	9.18667	0.08	0.35	-4.55323	Down	7.99e-16	3.86e-14	4.3409	Up	9.75e-17	2e-14	-2.5025	--	0.0368141	0.134808	-0.373217	--	0.810459	0.93003	Similar to H0211A12.5 protein.
Os10g0148400	1.39333	0.06	1.55667	0.03	0.0233333	-4.53743	Down	1.46e-09	2.8e-08	4.69735	Up	1.18e-08	6.36e-07	-1	--	0.704523	1	-1.36257	--	0.601193	0.824624	Similar to POT family protein.
Os06g0228200	51.9933	2.36333	25.47	0.11	0.19	-4.45943	Down	4.15e-19	2.8e-17	3.4299	Up	7.45e-09	4.22e-07	-4.42525	--	5.74e-09	2.37e-07	-3.63675	--	6.14e-05	0.000942911	Aquaporin NIP III subfamily protein Aquaporin Silicon influx transporter Water transport
Os02g0285300	61.8767	2.98667	20.6167	0.146667	0.18	-4.37279	Down	5.36e-27	6.82e-25	2.7872	Up	2.76e-08	1.35e-06	-4.34792	--	0.00026206	0.00288678	-4.05247	--	0.000200059	0.00263364	DREPP plasma membrane polypeptide family protein.
Os01g0248300	49.3567	2.47	8.51	1.21333	0.573333	-4.32066	Down	1.75e-25	1.92e-23	1.78465	Up	7.11e-06	0.000173867	-1.02554	--	0.0183746	0.081927	-2.10706	--	0.00233408	0.0193646	Similar to Pathogen-related protein.
Os01g0378100	3.26	0.17	0.88	0.03	0.0933333	-4.26127	Down	4.12e-15	1.82e-13	2.37197	Up	0.000332885	0.00429461	-2.5025	--	0.0508442	0.169096	-0.86507	--	0.420434	0.699889	Plant peroxidase domain containing protein.
Os12g0114800	92.0833	5.00667	50.0067	2.91	1.50667	-4.20102	Down	1.2e-06	1.25e-05	3.3202	Up	1.34e-07	5.45e-06	-0.782831	--	1	1	-1.73249	--	0.0887374	0.283036	Similar to Lipid transfer protein.
Os05g0163300	6.83	0.373333	1.80333	0.13	0.196667	-4.19335	Down	3.6e-19	2.45e-17	2.27213	Up	2.5e-05	0.000504996	-1.52195	--	0.247968	0.479248	-0.924712	--	0.440049	0.715531	Similar to Arabinogalactan protein-like.
Os10g0508000	1.08	0.06	0.406667	0.0366667	0.0566667	-4.16993	Down	4.09e-10	8.63e-09	2.76081	Up	4.32e-05	0.000792718	-0.710493	--	0.660996	0.823634	-0.0824622	--	0.92239	0.973952	Similar to C-terminal peptide-binding protein 1.
Os01g0216000	90.71	5.10667	64.8633	0.0566667	0.0433333	-4.15081	Down	6.6e-35	1.37e-32	3.66695	Up	1.24e-22	4.79e-20	-6.49374	--	4.63e-21	1.03e-18	-6.88076	--	2.05e-23	6.58e-21	Lipase GDSL domain containing protein.
Os07g0105000	119.757	6.77667	51.97	0.353333	2.98333	-4.14339	Down	1.08e-06	1.13e-05	2.93903	Up	1.19e-06	3.74e-05	-4.26147	--	3.09e-05	0.000481482	-1.18365	--	1	1	Cupredoxin domain containing protein.
Os11g0138950	17.5267	0.993333	3.86667	0.26	0.2	-4.14113	Down	2.26e-26	2.68e-24	1.96074	Up	0.00215108	0.0188606	-1.93377	--	0.0096085	0.0506559	-2.31228	--	0.000492448	0.00555319	Hypothetical gene.
Os03g0738600	247.07	14.5467	302.553	0.223333	8.04333	-4.08616	Down	2.5e-07	3.08e-06	4.37843	Up	1.92e-20	5.72e-18	-6.02535	--	9.25e-18	1.46e-15	-0.854823	--	0.670391	0.863848	Lipoxygenase Seed germination and longevity
Os10g0552800	732.217	43.5933	334.62	3.93333	12.38	-4.07009	Down	8.8e-05	0.000567073	2.94034	Up	0.00522426	0.0374207	-3.47028	--	1	1	-1.8161	--	1	1	Similar to Tfm5 protein.
Os01g0914300	101.417	6.12333	32.3567	2.5	2.55	-4.04983	Down	5.59e-24	5.58e-22	2.40167	Up	3.12e-09	1.96e-07	-1.29239	--	0.233489	0.46166	-1.26382	--	0.477691	0.74222	Plant lipid transfer protein/seed storage/trypsin-alpha amylase inhibitor domain containing protein.
Os02g0629800	59.1633	3.62333	59.9433	0.626667	1.59333	-4.02931	Down	1.81e-18	1.14e-16	4.04821	Up	6.26e-23	2.63e-20	-2.53155	--	0.0709544	0.212971	-1.18527	--	0.169341	0.422359	Defensin-like protein Positive regulation of Cd accumulation in rice leaves Mediation of Cd efflux from cytosol into extracellular spaces via chelation
Os07g0432333	519.033	32.19	108.667	2.74	4.35667	-4.01114	Down	2.57e-30	4.19e-28	1.75522	Up	5.59e-09	3.26e-07	-3.55436	--	3.65e-15	4.49e-13	-2.88532	--	5.14e-05	0.000809154	Similar to Thionin-like peptide.
Os06g0228500	4.99333	0.31	1.45333	0.0666667	0.01	-4.00966	Down	1.35e-13	4.82e-12	2.22903	Up	0.000228029	0.00316393	-2.21723	--	0.0710509	0.213104	-4.9542	--	0.00149555	0.013506	Amino acid transporter transmembrane domain containing protein.
Os12g0163750	5.39	0.34	1.97333	0.07	0.236667	-3.98668	Down	7.85e-12	2.2e-10	2.53703	Up	0.00626461	0.0429943	-2.28011	--	0.254839	1	-0.522678	--	0.711075	0.883693	Hypothetical protein.
Os11g0115100	142.6	9.17	81.0133	4.56	2.33333	-3.95891	Down	2.64e-05	0.000195296	3.14317	Up	0.000522895	0.00616622	-1.00789	--	0.618759	0.794664	-1.97453	--	0.0423411	0.17221	Similar to Lipid transfer protein.
Os04g0689000	291.227	18.9667	78.9	4.44333	21.0833	-3.9406	Down	4.32e-23	4.02e-21	2.05656	Up	1.13e-05	0.000259221	-2.09375	--	0.157526	0.360075	0.152637	--	0.958141	0.985655	Similar to Peroxidase (EC 1.11.1.7).
Os02g0198700	35.5667	2.35667	11.6333	4.54	4.31667	-3.91571	Down	4.34e-29	6.58e-27	2.30344	Up	1.69e-09	1.14e-07	0.945945	--	0.0169418	0.0774517	0.87317	--	0.0793619	0.263542	Similar to Subtilisin-like protease.
Os05g0217000	43.7333	2.92	19.72	1.22667	2.19333	-3.90469	Down	1.08e-17	6.27e-16	2.75562	Up	1.78e-08	9.12e-07	-1.25123	--	0.219673	0.444745	-0.412843	--	0.727451	0.890875	Protein of unknown function DUF1070 family protein.
MSTRG.33261	4.78333	0.32	2.33667	0.0166667	0.176667	-3.90187	Down	2.29e-12	6.9e-11	2.86831	Up	5.68e-07	1.95e-05	-4.26303	--	0.00686975	0.0394552	-0.857042	--	0.487701	0.749653	--
MSTRG.1622	110.427	7.61	31.1533	9.07	3.91	-3.85905	Down	5.15e-26	5.92e-24	2.03342	Up	2.24e-05	0.000460995	0.253206	--	0.469647	0.68968	-0.960728	--	0.0207895	0.103158	PREDICTED: ervatamin-B-like [Oryza sativa Japonica Group]
Os05g0587700	0.623333	0.0433333	0.376667	0.07	0.0733333	-3.84645	Down	2.65e-05	0.000196296	3.11974	Up	0.00434257	0.0324722	0.691878	--	0.814987	0.912075	0.758992	--	0.794938	0.922646	Conserved hypothetical protein.
Os03g0418000	10.8033	0.76	7.35667	0.386667	0.04	-3.82933	Down	2.47e-09	4.5e-08	3.27498	Up	5.85e-06	0.000148054	-0.974909	--	0.370032	0.604068	-4.24793	--	0.00442623	0.0320393	Similar to Basic endochitinase 2 precursor (EC 3.2.1.14).
Os07g0429700	5647.95	397.793	948.03	85.2767	47.7033	-3.82764	Down	4.78e-19	3.17e-17	1.25291	Up	0.00449848	0.033345	-2.2218	--	0.000388656	0.00400962	-3.05986	--	1.3e-06	3.37e-05	Similar to Thionin-like peptide.
Os11g0539200	80.7833	5.7	59.5233	0.643333	4.72	-3.82502	Down	0.000181528	0.00106962	3.38442	Up	0.00107241	0.0109207	-3.14732	--	0.00603737	0.0356988	-0.272175	--	0.826017	0.935311	Similar to Xyloglucan endotransglycosylase XET2 (Fragment).
Os01g0284500	1818.94	131.867	454.2	11.59	26.7533	-3.78595	Down	3.35e-28	4.88e-26	1.78425	Up	3.75e-06	0.000101161	-3.50813	--	2.41e-16	3.31e-14	-2.30129	--	0.0249372	0.118001	Similar to Nectarin 1 precursor (EC 1.15.1.1) (Superoxide dismutase [Mn]).
Os11g0257700	2.89333	0.216667	1.54333	0.0633333	0.32	-3.73918	Down	3.43e-09	6.07e-08	2.8325	Up	0.000299398	0.00393593	-1.77444	--	0.312312	0.548306	0.562595	--	0.794036	0.9223	Similar to SAM dependent carboxyl methyltransferase.
Os06g0193200	3.88667	0.293333	1.29	0.0966667	0.36	-3.72792	Down	2.92e-11	7.48e-10	2.13676	Up	0.00346739	0.0274223	-1.60145	--	0.332124	0.567419	0.295456	--	0.883762	0.959198	Similar to Pectin methylesterase 8 (Fragment).
Os09g0300800	14.15	1.07667	3.90333	0.06	0.62	-3.71616	Down	4.11e-15	1.82e-13	1.85814	Up	0.00048252	0.00577241	-4.16547	--	7.18e-05	0.000989139	-0.796232	--	0.509349	0.765222	Protein of unknown function DUF247 plant family protein.
Os04g0450701	23.6167	1.83667	12.9233	0.25	1.11333	-3.68464	Down	9.49e-10	1.89e-08	2.81482	Up	2.77e-05	0.000549773	-2.87709	--	0.0231359	0.0972608	-0.722204	--	0.477927	0.742396	Hypothetical protein.
MSTRG.550	7.48667	0.59	3.04333	0.833333	0.313333	-3.66554	Down	3.44e-16	1.71e-14	2.36687	Up	4.8e-06	0.000125347	0.498179	--	0.576908	0.766891	-0.913017	--	0.2216	0.497444	PREDICTED: myb-related protein Hv33-like [Oryza sativa Japonica Group]
Os03g0314500	10.2333	0.81	5.32333	0.4	0.72	-3.65921	Down	7.46e-38	1.74e-35	2.71634	Up	5.81e-06	0.000147178	-1.01792	--	0.412422	0.641738	-0.169925	--	0.859747	0.950307	WD40-like Beta Propeller domain containing protein.
Os10g0109300	85.2033	6.85	19.5667	0.0266667	0.0166667	-3.63673	Down	1.16e-15	5.49e-14	1.51422	Up	0.00397034	0.0303219	-8.00492	--	1.42e-14	1.57e-12	-8.68299	--	4.24e-16	5.64e-14	Similar to Peroxidase (EC 1.11.1.7).
Os02g0236600	106.307	8.6	43.2133	1.75333	1.06667	-3.62775	Down	3.01e-12	8.89e-11	2.32907	Up	1.61e-05	0.000347855	-2.29424	--	1	1	-3.01123	--	0.000831979	0.00846242	Peroxidase P7 (EC 1.11.1.7) (TP7).
Os04g0472200	6.83333	0.556667	2.25333	0.0333333	0.133333	-3.6177	Down	2.05e-17	1.15e-15	2.01718	Up	0.00424854	0.0319859	-4.06178	--	0.00251223	0.0181481	-2.06178	--	0.0702618	0.242495	Similar to H0418A01.11 protein.
Os03g0651950	12.3267	1.01333	12.1533	0.686667	1.25667	-3.6046	Down	2.8e-10	6.13e-09	3.58417	Up	1.76e-14	2.65e-12	-0.561427	--	1	1	0.310493	--	0.818206	0.932802	Hypothetical protein.
Os10g0404900	9.33333	0.773333	3.55667	0.0166667	0.05	-3.59323	Down	5.29e-08	7.46e-07	2.20136	Up	0.00169615	0.0157042	-5.53605	--	0.000160933	0.00194512	-3.95109	--	0.0082537	0.0521778	Similar to HAHB-5 (Fragment).
Os01g0205900	9.28333	0.78	7.83667	0.403333	0.956667	-3.5731	Down	7.02e-14	2.62e-12	3.32869	Up	1.8e-12	1.99e-10	-0.951501	--	0.531371	0.736957	0.294542	--	0.832978	0.938763	Similar to Class III peroxidase GvPx2b (Fragment).
Os10g0420200	2.86333	0.243333	1.49333	0.05	0.0166667	-3.55669	Down	7.96e-07	8.7e-06	2.61753	Up	0.00117464	0.0117094	-2.28293	--	0.202925	0.424144	-3.8679	--	0.0222219	0.108589	IQ calmodulin-binding region domain containing protein.
Os02g0833900	18.9567	1.62	12.5033	0.173333	0.753333	-3.54864	Down	0.000659488	0.00329827	2.94825	Up	3.61e-05	0.000681793	-3.22437	--	0.0127396	0.0628711	-1.10463	--	0.420267	0.699881	Similar to Peroxidase 64 precursor (EC 1.11.1.7) (Atperox P64) (PRXR4) (ATP17a).
Os07g0294100	1.40333	0.12	0.753333	0.0866667	0.01	-3.54775	Down	1.22e-11	3.32e-10	2.65025	Up	9.51e-06	0.000223231	-0.469485	--	0.677885	0.83349	-3.58496	--	0.0361959	0.154541	Similar to NB-ARC domain containing protein.
Os11g0587300	7.41333	0.636667	4.91667	0.246667	1.17	-3.54151	Down	1.32e-17	7.63e-16	2.94907	Up	9.42e-08	3.98e-06	-1.36798	--	1	1	0.877898	--	0.669922	0.863612	Conserved hypothetical protein.
Os04g0482100	4.16667	0.36	2.37333	0.293333	0.51	-3.53282	Down	6.44e-10	1.32e-08	2.72085	Up	0.000290171	0.00384177	-0.295456	--	0.801913	0.905337	0.5025	--	0.82247	0.934383	Similar to H0510A06.16 protein.
Os07g0256700	6.82	0.59	2.00667	0.676667	1.02	-3.53098	Down	5.92e-24	5.87e-22	1.76601	Up	0.00392335	0.0300467	0.19773	--	0.948221	0.976326	0.789782	--	0.476561	0.741849	Protein of unknown function DUF231 plant domain containing protein.
Os06g0212100	9.76333	0.866667	4.29667	0.41	1.24333	-3.49382	Down	1.33e-10	3.08e-09	2.30967	Up	0.000161209	0.00236462	-1.07985	--	0.292906	0.528664	0.520664	--	0.629191	0.841407	Similar to Galactoside 2-alpha-L-fucosyltransferase (EC 2.4.1.69) (Xyloglucan alpha-(1 2)-fucosyltransferase) (PsFT1).
Os03g0809000	87.8833	7.80667	20.0567	6.58333	2.50333	-3.49281	Down	1.48e-15	6.88e-14	1.3613	Up	0.00410694	0.0311145	-0.245888	--	0.738098	0.870653	-1.64086	--	0.00504279	0.0355562	Plant disease resistance response protein family protein.
Os10g0439100	6.06	0.54	3.22333	0.0533333	0.396667	-3.48829	Down	5.62e-14	2.13e-12	2.57752	Up	2.14e-07	8.27e-06	-3.33985	--	0.0156579	0.0730578	-0.445032	--	0.774187	0.913233	Similar to cDNA clone:002-180-G03 full insert sequence.
Os01g0217500	3.24667	0.29	1.78	0.316667	0.47	-3.48483	Down	3.52e-06	3.29e-05	2.61775	Up	0.00317796	0.0256789	0.126912	--	0.993898	0.997261	0.696608	--	0.673479	0.86573	ThiJ/PfpI domain containing protein.
Os04g0140666	16.1833	1.48667	6.36667	0.22	0.283333	-3.44436	Down	1.08e-13	3.93e-12	2.09846	Up	2.59e-05	0.000519976	-2.75651	--	0.000895679	0.00794022	-2.39151	--	0.0384081	0.160773	Similar to OSIGBa0124C14.6 protein.
Os03g0699700	37.5233	3.45667	14.0133	1.56667	3.16667	-3.44033	Down	6.01e-45	1.88e-42	2.01935	Up	0.000180297	0.00259851	-1.14168	--	0.0563979	0.182291	-0.126416	--	0.686669	0.872206	9-lipoxigenase.
Os01g0132000	414.25	38.8133	186.757	23.49	17.5133	-3.41588	Down	3.95e-28	5.73e-26	2.26654	Up	2.5e-24	1.2e-21	-0.724506	--	0.106568	0.279099	-1.1481	--	0.0050656	0.0357087	Similar to Wound-induced protease inhibitor (WIP1).
Os02g0321600	5.42	0.516667	1.58333	0.28	0.25	-3.39099	Down	1.65e-09	3.15e-08	1.61566	Up	0.00660974	0.044791	-0.883807	--	0.486126	0.703117	-1.04731	--	0.190617	0.453872	Conserved hypothetical protein.
Os04g0175900	0.44	0.0433333	0.666667	0.0733333	0.0633333	-3.34395	Down	0.00990878	0.0325518	3.94342	Up	0.00196822	0.0176362	0.758992	--	0.779792	1	0.547488	--	0.855887	0.948697	Winged helix repressor DNA-binding domain containing protein.
Os09g0304500	1.40667	0.14	1.5	0.0133333	0.03	-3.32878	Down	6.45e-07	7.2e-06	3.42146	Up	1.13e-07	4.67e-06	-3.39232	--	0.0955831	0.260294	-2.22239	--	0.151741	0.395481	Protein of unknown function DUF247 plant family protein.
Os03g0144300	18.9833	1.89	6.69667	0.753333	2.19	-3.32828	Down	9.24e-15	3.91e-13	1.82506	Up	0.00259371	0.0218865	-1.32703	--	1	1	0.212545	--	0.87866	0.957376	Similar to Xyloglucan galactosyltransferase KATAMARI 1 (EC 2.4.1.-) (MURUS3 protein).
Os10g0554800	32.6567	3.29	16.64	1.23667	1.60333	-3.31122	Down	1.93e-12	5.9e-11	2.3385	Up	2.48e-05	0.00050095	-1.41163	--	1	1	-1.03701	--	1	1	Plant lipid transfer protein and hydrophobic protein helical domain containing protein.
Os02g0756200	16.3367	1.64667	7.17	0.306667	1.03667	-3.31049	Down	9.95e-22	8.34e-20	2.12242	Up	3.36e-07	1.22e-05	-2.42481	--	0.000133827	0.00166847	-0.667596	--	0.301791	0.590669	Similar to Phi-1-like phosphate-induced protein.
Os05g0160800	2.29667	0.236667	1.15333	0.33	0.276667	-3.27861	Down	1.17e-10	2.72e-09	2.28488	Up	3.62e-05	0.000682087	0.47961	--	0.750786	0.877926	0.225292	--	0.8029	0.92644	Similar to DNA polymerase epsilon subunit 2.
Os12g0548700	484.007	49.9267	329.827	13.1267	18.0333	-3.27714	Down	2.85e-21	2.27e-19	2.72383	Up	1.57e-11	1.52e-09	-1.92731	--	2.24e-06	4.96e-05	-1.46914	--	0.0148817	0.0810042	Similar to MPI.
Os12g0609600	3.9	0.406667	1.80667	0.233333	0.366667	-3.26156	Down	2.36e-10	5.26e-09	2.15141	Up	0.00322817	0.0259578	-0.801454	--	0.506722	0.718762	-0.149378	--	0.832581	0.938672	Auxin responsive SAUR protein domain containing protein.
Os01g0686300	0.893333	0.0933333	0.503333	0.0133333	0.05	-3.25873	Down	4.07e-07	4.76e-06	2.43105	Up	0.000541293	0.006338	-2.80735	--	0.156741	0.358728	-0.900464	--	0.521849	0.774089	UDP-glucuronosyl/UDP-glucosyltransferase family protein.
Os04g0540600	2.02667	0.213333	0.696667	0.213333	0.293333	-3.24793	Down	7.7e-09	1.28e-07	1.70736	Up	0.00406538	0.0308488	0	--	0.968072	0.986769	0.459432	--	0.798127	0.923862	Aldehyde dehydrogenase domain containing protein.
Os09g0400200	2.52333	0.266667	1.58333	0.42	0.35	-3.24222	Down	4.95e-06	4.44e-05	2.56986	Up	0.00242276	0.020718	0.655352	--	0.581608	0.769717	0.392317	--	0.72149	0.888259	Similar to Cinnamyl alcohol dehydrogenase (EC 1.1.1.195).
Os01g0700900	2.24	0.24	1.56667	0.02	0.0366667	-3.22239	Down	8.38e-10	1.69e-08	2.70659	Up	1.53e-07	6.13e-06	-3.58496	--	0.0153841	0.072108	-2.71049	--	0.0746851	0.252708	Similar to Cytochrome P450 monooxygenase.
Os04g0641700	4.80333	0.52	4.33667	0.226667	0.883333	-3.20745	Down	3.57e-06	3.33e-05	3.06	Up	1.28e-08	6.84e-07	-1.19794	--	0.459433	0.68184	0.764446	--	0.716377	0.886097	Similar to H0423H10.4 protein.
Os06g0179400	1.90333	0.206667	1.36667	0.183333	0.206667	-3.20315	Down	9.33e-15	3.95e-13	2.72528	Up	5.27e-09	3.1e-07	-0.172837	--	0.837665	0.923302	0	--	0.961118	0.9864	Hypothetical protein.
Os03g0103300	22.0067	2.39	11.8367	4.62333	3.84333	-3.20286	Down	3.79e-19	2.57e-17	2.30818	Up	1.99e-05	0.000416586	0.951923	--	0.245678	0.476473	0.685347	--	0.304281	0.592476	Hybrid proline- or glycine-rich protein Controll of low-temperature germinability Pre-harvest sprouting resistance
Os08g0376550	28.0933	3.07667	33.9	0.74	2.31667	-3.19079	Down	9.48e-09	1.54e-07	3.46185	Up	3.57e-09	2.2e-07	-2.05577	--	0.0227504	0.096024	-0.409318	--	0.724408	0.889343	Similar to Patatin-like protein 1.
Os08g0506400	4.68	0.513333	2.96333	0.246667	0.643333	-3.18854	Down	2.48e-08	3.73e-07	2.52925	Up	0.000116511	0.00181921	-1.05733	--	1	1	0.32567	--	0.799843	0.924667	Serine/threonine protein kinase domain containing protein.
Os02g0786500	8.08667	0.89	4.03667	0.0666667	0.293333	-3.18367	Down	6.36e-11	1.55e-09	2.18129	Up	0.000208872	0.00294392	-3.73877	--	0.00459858	0.0289731	-1.60126	--	0.169516	0.422552	Similar to PR-1a pathogenesis related protein (Hv-1a) precursor.
Os11g0557800	64.63	7.12333	62.3633	11.1533	6.78667	-3.18158	Down	1.56e-15	7.23e-14	3.13007	Up	3.42e-10	2.65e-08	0.646851	--	0.394505	0.626755	-0.0698493	--	0.826096	0.935311	Conserved hypothetical protein.
Os12g0104400	15.0433	1.66333	12.6233	0.586667	3.17333	-3.17698	Down	2.82e-07	3.44e-06	2.92394	Up	6.17e-07	2.09e-05	-1.50346	--	0.105529	0.277447	0.931922	--	0.555079	0.795579	Fatty acid desaturase type 1 domain containing protein.
Os06g0220300	17.34	1.94	6.01333	0.706667	3.52	-3.15998	Down	1.73e-25	1.9e-23	1.63211	Up	0.00321955	0.0259095	-1.45695	--	0.233314	0.461465	0.859519	--	0.384723	0.670645	Similar to Phi-1 protein.
Os12g0552900	1.69667	0.19	1.34	0.196667	0.373333	-3.15863	Down	2.25e-08	3.42e-07	2.81816	Up	1.94e-06	5.72e-05	0.049753	--	0.993741	0.997164	0.974465	--	0.421627	0.701101	NB-ARC domain containing protein.
Os03g0645000	5.11333	0.583333	3.60667	0.63	0.733333	-3.13187	Down	4.78e-09	8.27e-08	2.62827	Up	7.88e-05	0.00131784	0.111031	--	0.989108	0.995396	0.330149	--	0.841193	0.942569	Similar to Expansin-B12.
Os06g0513943	57.8933	6.60667	79.6233	2.79333	12.0667	-3.1314	Down	0.000875435	0.00421211	3.5912	Up	2.06e-08	1.04e-06	-1.24193	--	0.197961	0.417397	0.869033	--	0.683222	0.870318	Conserved hypothetical protein.
Os09g0567800	7.23333	0.826667	3.03667	0.166667	0.143333	-3.12928	Down	5.34e-08	7.52e-07	1.87711	Up	0.00530864	0.037843	-2.31034	--	0.137974	0.329661	-2.52793	--	0.0338935	0.147464	Hypothetical conserved gene.
Os10g0377150	6.66667	0.766667	5.66333	0.626667	1.38	-3.12029	Down	4.8e-12	1.38e-10	2.88498	Up	3.36e-06	9.23e-05	-0.290901	--	0.712763	0.855007	0.847997	--	0.404167	0.685506	Hypothetical protein.
Os12g0484900	3.85	0.443333	1.83	0.443333	0.523333	-3.11839	Down	4.83e-08	6.86e-07	2.04538	Up	0.00712705	0.0472534	0	--	1	1	0.239338	--	0.905981	0.967048	Similar to Growth-regulating factor 7.
Os04g0465300	12.2633	1.42	6.41	2.07333	1.43667	-3.11039	Down	8.74e-11	2.08e-09	2.17443	Up	8.88e-06	0.000210754	0.546061	--	0.763272	0.884436	0.0168344	--	0.974793	0.990971	A member of the GAST (gibberellin (GA)-Stimulated Transcript) family Cell division Differentiation of panicles
Os11g0645400	6.85	0.796667	9.71	0.106667	0.0833333	-3.10406	Down	3.04e-09	5.44e-08	3.60742	Up	3.44e-09	2.13e-07	-2.90087	--	0.014855	0.0701682	-3.25701	--	0.00148041	0.0134175	Plant disease resistance response protein family protein.
Os03g0652000	7.08667	0.833333	6.07333	0.373333	0.443333	-3.08814	Down	2.89e-07	3.51e-06	2.86552	Up	5.77e-08	2.6e-06	-1.15843	--	0.394784	0.626962	-0.910502	--	0.513541	0.76801	C2 domain containing protein.
Os10g0552600	161.5	19.0333	99.64	1.15667	0.17	-3.08493	Down	4.51e-10	9.43e-09	2.3882	Up	4.46e-05	0.000814022	-4.04048	--	1	1	-6.80685	--	1.29e-05	0.000247668	Similar to Tfm5 protein.
Os02g0814400	7.62	0.9	2.37333	0.63	0.933333	-3.08179	Down	9.18e-12	2.55e-10	1.39892	Up	0.0048334	0.0352484	-0.514573	--	0.444259	0.66954	0.0524674	--	0.994379	0.997877	Cytochrome c monohaem domain containing protein.
Os03g0374500	9.33	1.10333	3.52	0.78	1.17	-3.08001	Down	1.16e-31	2.03e-29	1.67371	Up	7.26e-06	0.000177152	-0.500323	--	0.312229	0.548306	0.0846398	--	0.91724	0.971564	Similar to calmodulin-binding family protein.
Os08g0266700	0.816667	0.0966667	0.463333	0.153333	0.163333	-3.07866	Down	1.37e-08	2.17e-07	2.26096	Up	0.000352698	0.00448609	0.665581	--	0.423349	0.651304	0.756729	--	0.365762	0.654248	Rad21/Rec8 like protein C-terminal domain containing protein.
Os01g0296700	7.59667	0.9	4.76	0.19	0.383333	-3.07737	Down	9.03e-07	9.71e-06	2.40296	Up	0.00024772	0.00337614	-2.24393	--	0.0885878	0.247743	-1.23133	--	0.330174	0.61989	Glycoside hydrolase family 3 N-terminal domain containing protein.
Os05g0525600	1.43	0.17	0.753333	0.00666667	0.26	-3.07241	Down	2.47e-09	4.51e-08	2.14775	Up	0.000213074	0.00299551	-4.67243	--	0.00330087	0.022487	0.612977	--	0.689579	0.873154	Protein kinase catalytic domain domain containing protein.
Os02g0178700	3.11333	0.373333	1.67333	0.303333	0.57	-3.05992	Down	5.31e-05	0.000361087	2.16419	Up	0.00363059	0.0284486	-0.29956	--	0.833824	0.921203	0.610498	--	0.68043	0.868954	Helix-loop-helix DNA-binding domain containing protein.
Os10g0536700	36.9733	4.43667	21.9367	2.27	4.33333	-3.05894	Down	8.85e-17	4.71e-15	2.3058	Up	2.47e-06	7.06e-05	-0.966784	--	0.0333181	0.126054	-0.0339989	--	0.906744	0.967201	Similar to Peroxidase 1.
Os06g0604300	8.46333	1.03333	11.7467	0.6	1.15333	-3.03392	Down	1.42e-11	3.83e-10	3.50687	Up	1.17e-10	9.68e-09	-0.784271	--	0.204604	0.42632	0.158504	--	0.909527	0.968197	Chloroplast-localized phospholipase D Herbivore defense
Os02g0256100	2.81	0.343333	1.12333	0.386667	0.433333	-3.03289	Down	2.55e-09	4.62e-08	1.7101	Up	0.00600532	0.0416404	0.17148	--	0.852891	0.931845	0.335867	--	0.857661	0.949228	Pectin lyase fold/virulence factor domain containing protein.
Os04g0125700	9.62	1.17667	3.20333	0.263333	0.06	-3.03133	Down	1.23e-22	1.11e-20	1.44487	Up	0.00159419	0.014946	-2.15974	--	0.0487626	0.164724	-4.2936	--	4.37e-13	3.97e-11	Concanavalin A-like lectin/glucanase domain containing protein.
Os01g0668100	77.12	9.49	66.1733	6.42	12.5333	-3.02263	Down	3.69e-12	1.08e-10	2.80177	Up	5.82e-07	1.99e-05	-0.563835	--	0.28961	0.525578	0.40129	--	0.607936	0.828796	Similar to Arabinogalactan-like protein.
Os12g0548401	177.383	21.9133	151.627	10.8367	19.37	-3.01699	Down	9.03e-15	3.84e-13	2.79064	Up	6.25e-13	7.42e-11	-1.01589	--	0.00415538	0.0267711	-0.177985	--	0.707185	0.881835	Similar to Proteinase inhibitor.
Os09g0561000	27.75	3.43333	10.29	5.13333	3.64333	-3.01481	Down	1.67e-27	2.22e-25	1.58356	Up	1.02e-06	3.25e-05	0.580286	--	0.292667	0.528431	0.0856491	--	0.915158	0.970697	Similar to Wall-associated kinase-like 2.
Os01g0740350	2.18	0.27	1.15667	0.0533333	0.133333	-3.0133	Down	1.07e-09	2.1e-08	2.09894	Up	0.000627697	0.00712451	-2.33985	--	0.134127	0.324029	-1.01792	--	0.451539	0.724116	Hypothetical gene.
MSTRG.5945	4.07667	0.506667	3.11	0.00666667	0.763333	-3.00828	Down	5.71e-05	0.000385316	2.61781	Up	3.61e-05	0.000682087	-6.24793	--	0.000101202	0.00132753	0.591276	--	0.719954	0.887714	--
Os03g0285300	21.1967	2.65667	8.79667	3.52667	2.70667	-2.99615	Down	1.43e-09	2.76e-08	1.72734	Up	0.000936531	0.00984856	0.408688	--	0.586204	0.772754	0.0269	--	0.962505	0.987085	Conserved hypothetical protein.
Os03g0369600	4.58667	0.58	2.73	0.236667	0.173333	-2.98332	Down	3.35e-11	8.5e-10	2.23478	Up	0.000365537	0.00461799	-1.2932	--	0.204932	0.42667	-1.7425	--	0.015953	0.0852058	Similar to Class III peroxidase 48.
Os08g0376500	17.48	2.21667	21.4833	0.33	1.51	-2.97924	Down	1.84e-06	1.84e-05	3.27675	Up	1.54e-06	4.68e-05	-2.74785	--	0.00402931	0.0261363	-0.553843	--	0.654027	0.856021	Similar to Patatin-like protein.
Os01g0878000	1.96667	0.25	1.16333	0.206667	0.336667	-2.97575	Down	2.44e-09	4.46e-08	2.21826	Up	0.000122615	0.00189563	-0.274622	--	0.817777	0.913252	0.429393	--	0.842412	0.943131	Conserved hypothetical protein.
Os12g0289600	6.06333	0.773333	3.63	0.503333	0.946667	-2.97095	Down	2.34e-08	3.54e-07	2.23081	Up	0.000136217	0.00206263	-0.619576	--	0.619014	0.794783	0.291766	--	0.862584	0.951612	Conserved hypothetical protein.
Os06g0604200	5.01333	0.64	6.88333	0.5	1.09333	-2.96963	Down	1.68e-14	6.84e-13	3.42696	Up	8.05e-13	9.36e-11	-0.356144	--	0.442759	0.668341	0.77259	--	0.493958	0.754567	Chloroplast-localized phospholipase D Herbivore defense
Os01g0757400	21.1133	2.70333	13.2167	1.40333	2.79667	-2.96534	Down	9.05e-11	2.15e-09	2.28955	Up	7.77e-07	2.56e-05	-0.945882	--	0.168553	0.37639	0.0489689	--	0.987042	0.995181	Similar to Katanin p60 ATPase-containing subunit A1 (EC 3.6.4.3) (Katanin p60 subunit A1) (p60 katanin). Splice isoform 2.
Os01g0296450	8.23333	1.05667	4.62333	0.0666667	0.0966667	-2.96196	Down	3.62e-07	4.3e-06	2.12941	Up	0.000399603	0.00497848	-3.98641	--	0.00300216	0.0208972	-3.45036	--	0.00401023	0.0296172	Hypothetical protein.
Os01g0605500	3.11333	0.4	2.79667	0.463333	0.546667	-2.96039	Down	9.25e-12	2.57e-10	2.80564	Up	2.38e-13	3e-11	0.21205	--	0.90241	0.956463	0.450661	--	0.680125	0.868681	Kinesin motor region domain containing protein.
Os04g0128400	1.08667	0.14	0.91	0.0666667	0.0566667	-2.95641	Down	0.00221474	0.00927954	2.70044	Up	0.00647779	0.0440976	-1.07039	--	0.484473	0.702061	-1.30485	--	0.433243	0.710056	Similar to OSIGBa0126J24.7 protein.
Os06g0692050	2.18667	0.283333	1.44333	0.0833333	0.396667	-2.94816	Down	6.53e-05	0.000433181	2.34883	Up	0.000790975	0.00856439	-1.76553	--	0.330641	0.565904	0.485427	--	0.786284	0.918869	Conserved hypothetical protein.
Os09g0286300	1.01333	0.133333	1.10333	0.156667	0.11	-2.926	Down	0.000257019	0.00145409	3.04876	Up	2.29e-05	0.000470353	0.232661	--	0.905939	0.958174	-0.277534	--	0.751796	0.9024	Hypothetical conserved gene.
Os01g0176800	4.46667	0.59	1.71667	0.176667	0.856667	-2.92041	Down	2.42e-28	3.57e-26	1.54082	Up	0.00149932	0.0141996	-1.73969	--	0.142784	0.337794	0.538019	--	0.623123	0.838421	Protein of unknown function DUF2921 domain containing protein.
Os04g0412800	3.95667	0.523333	3.02	0.24	0.566667	-2.91848	Down	1.64e-12	5.03e-11	2.52875	Up	3.34e-08	1.59e-06	-1.1247	--	0.341793	0.57783	0.11477	--	0.960643	0.986227	Thioredoxin fold domain containing protein.
Os08g0260400	1.33333	0.176667	1.05333	0.116667	0.213333	-2.91594	Down	0.000133591	0.000814498	2.57586	Up	0.000414741	0.00512585	-0.598637	--	0.720204	0.859736	0.27208	--	0.918417	0.972039	Conserved hypothetical protein.
Os03g0264600	3.5	0.466667	2.25667	0.156667	0.393333	-2.90689	Down	1.06e-06	1.12e-05	2.27373	Up	4.15e-05	0.000765713	-1.57469	--	0.208216	0.430614	-0.24664	--	0.811947	0.930408	Similar to Nucleic acid binding protein.
Os05g0552550	9.9	1.32667	4.25667	0.28	2.53	-2.89962	Down	1.78e-14	7.24e-13	1.68192	Up	0.00662773	0.0448822	-2.24431	--	0.040556	0.144552	0.931331	--	0.40013	0.682441	Hypothetical gene.
Os07g0639400	49.8333	6.72667	19.6233	1.76667	3.99	-2.88915	Down	5.6e-12	1.6e-10	1.54461	Up	0.00430132	0.032261	-1.92886	--	0.0252279	0.10308	-0.753503	--	1	1	Similar to Peroxidase 1.
Os02g0675700	4.59333	0.623333	3.85	0.453333	0.636667	-2.88147	Down	1.45e-07	1.89e-06	2.62678	Up	7.52e-10	5.55e-08	-0.459432	--	0.605687	0.785643	0.0305344	--	1	1	Protein of unknown function DUF248 methyltransferase putative family protein.
Os12g0590500	1.47333	0.2	1	0.31	0.18	-2.88101	Down	4.53e-06	4.1e-05	2.32193	Up	4.17e-06	0.000111105	0.632268	--	1	1	-0.152003	--	0.836941	0.940502	Similar to Kinesin motor domain containing protein expressed.
Os11g0169400	1.24333	0.17	0.853333	0.23	0.226667	-2.87061	Down	1.86e-06	1.85e-05	2.32757	Up	0.000415641	0.00513057	0.436099	--	0.797626	0.903157	0.415037	--	0.739257	0.896426	Similar to Zinc finger C2H2 type family protein expressed.
Os01g0756200	8.99	1.24	7.77667	0.11	1.24667	-2.85798	Down	2.35e-05	0.000176341	2.64881	Up	0.000126303	0.00193998	-3.49476	--	0.0175614	0.0793959	0.00773565	--	0.971682	0.990065	Similar to VirE2-interacting protein VIP1.
Os01g0375500	2.32	0.32	1.61667	0.05	0.27	-2.85798	Down	1.45e-06	1.47e-05	2.33688	Up	0.000925586	0.0097593	-2.67807	--	0.104947	0.276563	-0.245112	--	0.872727	0.955497	Similar to Shikimate biosynthesis protein aroDE.
Os05g0582000	9.88667	1.36667	5.13667	0.303333	0.326667	-2.85482	Down	5.71e-12	1.63e-10	1.91017	Up	0.00213523	0.0187492	-2.17169	--	0.00064631	0.00605424	-2.06477	--	0.00292366	0.0231744	Plant Basic Secretory Protein domain containing protein.
Os08g0231400	124.653	17.33	49.43	7.96	10.1633	-2.84658	Down	2.16e-39	5.43e-37	1.51212	Up	0.000631751	0.00714976	-1.12243	--	0.00536439	0.0325235	-0.769898	--	0.00242582	0.0199829	Germin-like protein 8-12 Disease resistance
Os05g0552600	23.5833	3.28	9.55	1.15667	4.42333	-2.846	Down	2.37e-22	2.07e-20	1.5418	Up	0.00620584	0.042715	-1.50372	--	1	1	0.431438	--	0.679744	0.868489	Similar to root cap periphery gene2.
Os02g0122700	1.43667	0.2	1.05	0.213333	0.29	-2.84465	Down	2.29e-05	0.000172566	2.39232	Up	0.000639717	0.00722618	0.0931094	--	0.991696	0.996335	0.536053	--	0.751222	0.902213	Similar to SET domain protein.
Os11g0225000	14.5767	2.03	5.00333	2.44333	3.14333	-2.84411	Down	8.27e-23	7.5e-21	1.30141	Up	0.00328775	0.026295	0.267371	--	0.47969	0.698087	0.630816	--	0.0836657	0.272794	Serine/threonine protein kinase-related domain containing protein.
Os12g0601000	2.84333	0.396667	2.04667	0.333333	0.41	-2.84158	Down	2.41e-06	2.35e-05	2.36728	Up	4.88e-05	0.000879383	-0.250962	--	0.734113	0.867427	0.0476967	--	0.985315	0.994627	Similar to Leucine Rich Repeat family protein expressed.
Os06g0338700	4.01	0.56	1.85667	0.356667	0.403333	-2.8401	Down	8.26e-13	2.67e-11	1.72922	Up	0.0034694	0.0274309	-0.65085	--	0.457239	0.680166	-0.473454	--	0.500329	0.759103	Similar to Primary amine oxidase.
Os06g0614400	17.58	2.46333	17.4633	4.31	3.41	-2.83525	Down	2.09e-11	5.48e-10	2.82565	Up	1.08e-12	1.23e-10	0.807076	--	0.0930756	0.255821	0.46916	--	0.383755	0.669667	Conserved hypothetical protein.
Os08g0115200	8.73	1.22333	4.80667	0.583333	1.49667	-2.83516	Down	1.34e-21	1.12e-19	1.97422	Up	5.3e-05	0.000942662	-1.06843	--	0.179607	0.392342	0.290935	--	0.771942	0.911993	IQ calmodulin-binding region domain containing protein.
Os09g0548200	7.11	0.996667	5.72333	0.606667	0.866667	-2.83467	Down	2.08e-09	3.85e-08	2.52167	Up	2.04e-09	1.35e-07	-0.716207	--	0.514568	0.724444	-0.201634	--	0.827136	0.935915	Peptidoglycan-binding Lysin subgroup domain containing protein.
Os01g0740300	19.64	2.76667	7.93333	1.58	0.806667	-2.82757	Down	1.75e-07	2.23e-06	1.51978	Up	0.00207805	0.0183282	-0.808224	--	0.175608	0.386629	-1.7781	--	0.000857062	0.00865344	Hypothetical protein.
Os04g0461800	1.93333	0.273333	0.99	0.106667	0.22	-2.82236	Down	2.37e-12	7.13e-11	1.85677	Up	1.37e-05	0.000302992	-1.35755	--	0.0473105	0.161077	-0.313158	--	0.700123	0.877996	Actin-binding FH2 domain containing protein.
Os01g0126900	18.23	2.58333	9.59333	0.6	0.713333	-2.81901	Down	1.03e-07	1.37e-06	1.8928	Up	0.000359442	0.00455437	-2.1062	--	0.0292608	0.114822	-1.85659	--	0.0266733	0.124173	Multicopper oxidase
Os02g0574600	14.0133	1.98667	8.50667	1.46333	2.30667	-2.81838	Down	1.61e-10	3.68e-09	2.09824	Up	2.91e-05	0.000573249	-0.441091	--	0.62558	0.799133	0.21546	--	1	1	Similar to H0523F07.2 protein.
Os07g0663800	131.22	18.6833	42.98	30.36	33.9967	-2.81216	Down	4.93e-44	1.51e-41	1.20191	Up	6.32e-07	2.12e-05	0.70042	--	0.0188551	0.0836763	0.863641	--	0.0308848	0.138065	Similar to Oxidoreductase short chain dehydrogenase/reductase family protein expressed.
Os04g0553500	4.97667	0.71	2.56	1.08	0.613333	-2.80929	Down	6.31e-09	1.06e-07	1.85025	Up	0.000141577	0.00212587	0.60514	--	1	1	-0.211148	--	0.796072	0.923229	Pectin lyase fold domain containing protein.
MSTRG.20651	28.9167	4.13667	15.9733	1.69667	1.26333	-2.80536	Down	4.94e-25	5.26e-23	1.94912	Up	0.000105356	0.00166458	-1.28577	--	0.0458569	0.157429	-1.71123	--	1.7e-05	0.000313862	--
Os02g0739700	4.68333	0.67	3.54667	0.733333	0.79	-2.8053	Down	1.63e-10	3.72e-09	2.40423	Up	1.27e-08	6.79e-07	0.130308	--	0.930034	0.967487	0.237692	--	0.816824	0.9323	E2F Family domain containing protein.
Os09g0400100	1.7	0.243333	1.90667	0.473333	0.356667	-2.80453	Down	0.0010696	0.00499146	2.97005	Up	0.000628563	0.00712451	0.959923	--	0.46028	0.682637	0.551642	--	0.730555	0.892314	Similar to Cinnamyl alcohol dehydrogenase (EC 1.1.1.195).
Os05g0219900	0.93	0.133333	1.24333	0.0166667	0.123333	-2.80219	Down	9.81e-05	0.000622907	3.2211	Up	1.8e-09	1.2e-07	-3	--	0.0685883	0.20835	-0.112475	--	0.93079	0.976007	C4-dicarboxylate transporter/malic acid transport protein family protein.
Os12g0560700	4.43667	0.636667	3.58333	0.953333	1.22667	-2.80087	Down	8.07e-16	3.89e-14	2.49269	Up	1.04e-20	3.21e-18	0.582443	--	0.469321	0.689542	0.946133	--	0.134437	0.367594	Similar to PROLIFERA protein.
Os10g0529300	41.5467	5.98333	17.3633	3.57667	1.71667	-2.79571	Down	3.59e-18	2.18e-16	1.53702	Up	0.00194974	0.0175149	-0.742334	--	0.0535055	0.175565	-1.80134	--	5.83e-05	0.000902003	Similar to Tau class GST protein 3.
Os06g0636700	1.15667	0.166667	0.99	0.07	0.0533333	-2.79494	Down	2.27e-06	2.22e-05	2.57046	Up	1.99e-05	0.000416586	-1.25154	--	0.473245	0.692393	-1.64386	--	0.346337	0.635499	Esterase SGNH hydrolase-type domain containing protein.
Os03g0297850	1.94	0.28	1.42	0.1	0.323333	-2.79256	Down	1.76e-08	2.73e-07	2.34239	Up	0.000121996	0.00188999	-1.48543	--	0.357349	0.591886	0.207595	--	0.875521	0.956332	Hypothetical protein.
Os07g0481100	2.95333	0.426667	1.53333	0.0766667	0.04	-2.79116	Down	1.42e-08	2.24e-07	1.84549	Up	4.82e-05	0.00086902	-2.47644	--	0.0125273	0.0620312	-3.41504	--	0.000298965	0.00369715	Rop nucleotide exchanger PRONE domain containing protein.
Os12g0149300	3.40667	0.496667	2.37333	0.16	0.803333	-2.77801	Down	7.17e-09	1.19e-07	2.25656	Up	0.000233624	0.00322504	-1.63421	--	0.14512	0.341181	0.693721	--	0.516936	0.770483	Similar to galactosyl transferase GMA12/MNN10 family protein.
Os06g0273200	4.34667	0.64	3.02667	0.213333	0.543333	-2.76377	Down	1.34e-13	4.79e-12	2.24159	Up	9.72e-05	0.00156349	-1.58496	--	0.293021	0.528703	-0.236234	--	0.783111	0.917915	Protein of unknown function DUF231 plant domain containing protein.
Os05g0563550	65.9967	9.72333	77.5067	11.3567	15.43	-2.76287	Down	7.43e-07	8.18e-06	2.9948	Up	3.18e-07	1.17e-05	0.224017	--	0.755735	0.881017	0.666215	--	0.428453	0.706153	FAS1 domain domain containing protein.
Os10g0330000	220	32.45	181.85	34.7733	27.2567	-2.76121	Down	3.09e-13	1.06e-11	2.48646	Up	7.8e-09	4.38e-07	0.0997629	--	0.7892	0.898532	-0.251609	--	0.44915	0.722513	Conserved hypothetical protein.
Os01g0618700	3.17667	0.47	1.92333	0.22	0.66	-2.75678	Down	4.39e-07	5.1e-06	2.03288	Up	0.000947626	0.00993889	-1.09516	--	0.22405	0.450688	0.489805	--	0.675043	0.866498	Lipase class 3 family protein.
Os12g0260500	313.347	46.3933	144.527	81.7667	72.4333	-2.75577	Down	3.02e-43	9.11e-41	1.63935	Up	9.9e-05	0.00158347	0.817595	--	0.00390155	0.0255044	0.642736	--	6.94e-06	0.000144167	Similar to Oxidoreductase short chain dehydrogenase/reductase family protein expressed.
Os04g0495400	42.7533	6.33	21.79	1.13333	2.45667	-2.75576	Down	2.8e-07	3.42e-06	1.78339	Up	0.000998046	0.0103438	-2.48163	--	0.000415826	0.00423938	-1.3655	--	0.0966278	0.298523	DOMON domain containing protein.
Os12g0441600	3.46667	0.513333	1.63667	0.0366667	0.223333	-2.75558	Down	1.74e-06	1.74e-05	1.67279	Up	0.00562223	0.0396044	-3.80735	--	0.00161069	0.0127602	-1.2007	--	0.30694	0.595215	O-methyltransferase family 2 domain containing protein.
Os03g0628800	48.2667	7.16333	24.78	7.11	6.19	-2.75232	Down	7.27e-36	1.57e-33	1.79047	Up	7.47e-07	2.48e-05	-0.0107815	--	0.982399	0.992042	-0.210692	--	0.356557	0.64553	Similar to H1flk (Fragment).
Os10g0439924	7.49333	1.11667	3.30333	1.20667	1.42667	-2.74641	Down	5.77e-11	1.41e-09	1.56472	Up	0.00014036	0.00211079	0.111829	--	0.799131	0.903748	0.35345	--	0.585353	0.814387	Cytochrome P450 family protein.
Os03g0138700	3.46667	0.516667	2.27667	0.513333	0.23	-2.74624	Down	1.11e-12	3.52e-11	2.13962	Up	7.42e-05	0.00125272	-0.00933786	--	0.990312	0.995765	-1.1676	--	0.0586433	0.215028	TGF-beta receptor type I/II extracellular region family protein.
Os05g0438700	121.557	18.2033	74.38	14.72	22.0033	-2.73935	Down	1.33e-20	1e-18	2.03071	Up	5.58e-06	0.000142163	-0.306425	--	0.626264	0.799564	0.273519	--	0.782928	0.917843	Similar to Histone H3.
Os10g0402200	1.66	0.25	1.17	0.33	0.273333	-2.73118	Down	2.59e-07	3.19e-06	2.22651	Up	8.64e-06	0.00020626	0.400538	--	0.795198	0.901838	0.128733	--	0.935931	0.977718	Origin recognition complex subunit 3 Lateral root development
Os01g0514600	4.85333	0.733333	2.53	0.37	0.353333	-2.72643	Down	2.86e-11	7.34e-10	1.7866	Up	1.42e-06	4.37e-05	-0.986944	--	0.224839	0.451504	-1.05344	--	0.140368	0.377838	Similar to Fimbrin 1 (AtFIM1).
Os11g0514800	13.8533	2.09333	6.65	1.36333	2.36667	-2.72636	Down	6.59e-11	1.6e-09	1.66755	Up	8.31e-05	0.00138078	-0.618664	--	0.53977	0.742509	0.177054	--	0.885526	0.959733	BRO1 domain domain containing protein.
Os05g0371600	1.01333	0.153333	0.656667	0.05	0.22	-2.72437	Down	3.02e-05	0.000221194	2.09849	Up	0.00615911	0.0424916	-1.61667	--	0.267685	0.501459	0.520832	--	0.770045	0.911347	Similar to BRASSINOSTEROID INSENSITIVE 1-associated receptor kinase 1.
Os06g0127800	6.79667	1.03667	6.5	0.84	1.1	-2.71288	Down	6.26e-10	1.28e-08	2.64849	Up	9.52e-11	8.01e-09	-0.303491	--	0.835471	0.922265	0.0855514	--	0.980647	0.992911	GAI-RGA-SCR (GRAS) family protein Brassinosteroid signaling
Os03g0196000	12.6467	1.93	7.78333	1.31667	1.35	-2.71208	Down	1.75e-20	1.3e-18	2.01179	Up	0.00394609	0.030182	-0.551711	--	0.136956	0.328255	-0.515641	--	0.118303	0.338927	Similar to Sulfate transporter.
Os01g0249800	16.5133	2.52333	7.57	1.89	2.82667	-2.71023	Down	2.36e-13	8.21e-12	1.58496	Up	0.00098672	0.0102622	-0.416945	--	0.595804	0.779231	0.163771	--	0.856024	0.948697	Heavy metal-associated domain HMA domain containing protein.
Os12g0124700	1.13333	0.173333	1.15	0.146667	0.133333	-2.70895	Down	7.75e-06	6.59e-05	2.73001	Up	1.67e-05	0.000359881	-0.241008	--	0.83753	0.923257	-0.378512	--	0.667137	0.862223	CDC45-like protein family protein.
Os09g0456100	2.37667	0.366667	1.11667	0.32	0.17	-2.6964	Down	3.1e-06	2.94e-05	1.60666	Up	0.00279187	0.0232274	-0.196397	--	0.792172	0.900308	-1.10893	--	0.16253	0.411868	Remorin_C-containing protein Control of panicle length
Os01g0929200	17.46	2.69667	9.2	1.55333	1.29667	-2.6948	Down	1.68e-21	1.38e-19	1.77046	Up	1.72e-06	5.14e-05	-0.79581	--	0.0830029	0.237198	-1.05637	--	0.00256765	0.0208991	Serine/threonine protein kinase domain containing protein.
Os02g0807900	4.76	0.743333	2.74333	0.386667	0.87	-2.67888	Down	1.29e-12	4.03e-11	1.88385	Up	3.63e-05	0.000684493	-0.942919	--	0.0918542	0.253744	0.227006	--	0.759194	0.905844	Conserved hypothetical protein.
Os10g0454200	225.25	35.26	158.26	1.19	24.34	-2.67542	Down	2.88e-10	6.28e-09	2.16619	Up	0.000117803	0.00183458	-4.889	--	0.00121889	0.0102088	-0.534703	--	1	1	Eggshell protein family protein.
Os01g0813800	2.01333	0.316667	1.26667	0.05	0.07	-2.66855	Down	9.51e-07	1.02e-05	2	Up	0.00011448	0.00178938	-2.66297	--	0.0198941	0.0871697	-2.17754	--	0.0705365	0.243128	Similar to Beta-glucosidase 3.
Os02g0264800	30.5633	4.82333	26.9067	2.40667	4.54333	-2.6637	Down	2.77e-06	2.65e-05	2.47986	Up	6.09e-05	0.00106296	-1.00299	--	0.293463	0.529111	-0.0862794	--	0.889477	0.961289	Protein of unknown function DUF1070 family protein.
Os09g0338500	29.99	4.76333	20.37	1.91667	4.49	-2.65444	Down	0.00241322	0.00998804	2.0964	Up	0.000705057	0.00780438	-1.31337	--	0.0984286	0.26511	-0.0852561	--	0.903835	0.966268	Similar to Desaturase/cytochrome b5 protein.
Os07g0642800	3.56333	0.566667	1.28	0.38	0.516667	-2.65266	Down	1.65e-11	4.4e-10	1.17557	Up	0.00304646	0.0248321	-0.576501	--	0.564489	0.758695	-0.133267	--	0.746138	0.899829	Similar to plectin-related.
Os08g0101100	16.7033	2.66	12.4133	3.36333	4.16	-2.65064	Down	2.85e-28	4.18e-26	2.22239	Up	1.23e-08	6.6e-07	0.338466	--	0.727444	0.863559	0.645157	--	0.398464	0.681421	High mobility group HMG1/HMG2 domain containing protein.
Os03g0149200	47.7833	7.62333	32.2067	6.84	9.72333	-2.64801	Down	1.26e-15	5.95e-14	2.07887	Up	2.05e-06	5.98e-05	-0.156426	--	0.734556	0.867742	0.351029	--	0.649766	0.853826	HR-like lesion-inducer family protein.
Os03g0127700	7.16	1.14333	3.46	0.383333	0.56	-2.64671	Down	1.24e-07	1.62e-06	1.59753	Up	0.00236031	0.0203182	-1.57657	--	0.0279445	0.110915	-1.02975	--	0.243794	0.524159	Serine/threonine protein kinase-related domain containing protein.
Os03g0128300	16.8433	2.69	13.4267	1.40333	2.44667	-2.6465	Down	2.56e-11	6.63e-10	2.31942	Up	4.23e-06	0.000112151	-0.938748	--	0.38871	0.621678	-0.136789	--	0.804575	0.927274	Conserved hypothetical protein.
Os03g0279200	200.337	32.0233	147.657	29.9267	47.0667	-2.64523	Down	7.13e-25	7.54e-23	2.20505	Up	7.79e-08	3.37e-06	-0.0976919	--	0.797444	0.903148	0.555582	--	0.626875	0.840019	Similar to Histone H2A.
Os09g0399800	179.383	28.85	139.913	7.60667	5.75667	-2.6364	Down	5.81e-24	5.78e-22	2.27789	Up	1.86e-11	1.77e-09	-1.92324	--	8.93e-09	3.56e-07	-2.32527	--	1.65e-29	8.89e-27	Cinnamyl alcohol dehydrogenase (EC 1.1.1.195).
Os01g0294700	398.743	64.3367	232.39	4.05	22.3067	-2.63175	Down	1.59e-08	2.48e-07	1.85283	Up	0.000186573	0.0026786	-3.98965	--	1	1	-1.52817	--	1	1	Haem peroxidase plant/fungal/bacterial family protein.
Os05g0594500	1.9	0.306667	1.62667	0.2	0.123333	-2.63126	Down	0.00021974	0.00126811	2.40718	Up	0.000268947	0.00361037	-0.616671	--	0.526739	0.733992	-1.31411	--	0.188863	0.451367	Invasin/intimin cell-adhesion domain containing protein.
Os11g0249300	0.846667	0.136667	0.706667	0.0633333	0.176667	-2.63113	Down	5.6e-06	4.94e-05	2.37037	Up	0.000215567	0.00302855	-1.10962	--	0.41474	0.643624	0.370368	--	0.715529	0.885608	Conserved hypothetical protein.
Os03g0113500	6.63667	1.07333	3.51333	0.0733333	0.273333	-2.62836	Down	1.79e-11	4.77e-10	1.71074	Up	6.9e-07	2.31e-05	-3.87149	--	4.01e-05	0.00060226	-1.97336	--	0.275932	0.562347	Conserved hypothetical protein.
Os09g0539400	1.66333	0.27	1.42333	0.15	0.29	-2.62305	Down	0.000351516	0.00190666	2.39824	Up	0.00135897	0.0131507	-0.847997	--	0.540337	0.742637	0.103093	--	0.975357	0.991113	Similar to MCM10 minichromosome maintenance deficient 10.
Os03g0747100	2.87333	0.466667	3.00333	0.463333	0.79	-2.62226	Down	8.51e-10	1.71e-08	2.6861	Up	2.44e-09	1.58e-07	-0.0103419	--	0.958487	0.98228	0.75946	--	0.590593	0.81794	ERG2/sigma1 receptor-like domain containing protein.
Os06g0696400	55.1767	8.97667	55.1933	0.996667	3.52667	-2.61981	Down	5.04e-09	8.68e-08	2.62024	Up	1.39e-09	9.52e-08	-3.171	--	3.95e-05	0.000594097	-1.34787	--	0.146596	0.387963	Xyloglycan endo-transglycosylase precursor.
Os05g0235800	5.23667	0.853333	4.17333	1.19	1.22667	-2.61747	Down	6.87e-14	2.57e-12	2.29002	Up	2.77e-15	4.6e-13	0.47978	--	0.491746	0.707315	0.523562	--	0.302973	0.59162	DNA-dependent ATPase MCM domain containing protein.
Os05g0390550	19.36	3.17	10.6	0.763333	2.77	-2.61052	Down	2.66e-10	5.86e-09	1.74151	Up	0.000239023	0.00328375	-2.0541	--	0.246985	0.478031	-0.194597	--	0.796112	0.923229	Conserved hypothetical protein.
Os08g0492000	5.73667	0.94	2.29333	0.433333	0.533333	-2.60948	Down	9.49e-27	1.17e-24	1.28671	Up	2.75e-05	0.000545303	-1.11718	--	0.0210122	0.0905734	-0.817623	--	0.152166	0.396109	Similar to Glutathione transporter.
Os02g0767300	1.83	0.3	1.55	0.123333	0.213333	-2.60881	Down	7.47e-08	1.02e-06	2.36923	Up	0.000641059	0.00723585	-1.2824	--	0.176556	0.387961	-0.491853	--	0.575008	0.80717	Similar to Flavonol synthase/flavanone 3-hydroxylase (EC 1.14.11.23) (EC 1.14.11.9) (FLS) (CitFLS).
Os11g0128400	1.44333	0.236667	0.93	0.163333	0.216667	-2.60848	Down	3.31e-05	0.000238949	1.97437	Up	0.00326247	0.0261701	-0.535037	--	0.638649	0.808125	-0.127379	--	0.806386	0.928255	CDC45-like protein family protein.
Os10g0104900	6.8	1.12333	4.96667	1.37667	1.40667	-2.59775	Down	4.44e-11	1.1e-09	2.14449	Up	1.01e-07	4.24e-06	0.293393	--	0.836672	0.922801	0.324494	--	0.71543	0.885607	Chromomethylase Plant development Silencing of transposable elements (TEs)
Os06g0294600	7.55	1.25	4.69667	0.52	0.81	-2.59455	Down	9.69e-20	6.85e-18	1.90971	Up	1.27e-08	6.79e-07	-1.26534	--	0.00201575	0.0151998	-0.625934	--	0.244969	0.525451	Cytochrome P450 family protein.
Os03g0168700	1.20667	0.2	0.756667	0.173333	0.22	-2.59296	Down	4.2e-05	0.000294329	1.91966	Up	0.000530916	0.00624844	-0.206451	--	0.87143	0.941126	0.137504	--	0.903186	0.966099	SET domain containing protein.
Os01g0233500	3.47	0.576667	2.49	0.7	0.836667	-2.58913	Down	2.42e-10	5.38e-09	2.11034	Up	1.23e-09	8.53e-08	0.279617	--	0.812234	0.910486	0.536915	--	0.433638	0.710588	Cyclin.
Os05g0210500	0.8	0.133333	0.93	0.193333	0.186667	-2.58496	Down	6.59e-06	5.72e-05	2.80219	Up	9.66e-11	8.08e-09	0.536053	--	0.765909	0.885719	0.485427	--	0.517467	0.770786	Timeless protein domain containing protein.
Os09g0538500	8.89333	1.48667	6.56333	1.15	1.44	-2.58064	Down	4.1e-18	2.48e-16	2.14235	Up	3.72e-10	2.85e-08	-0.370447	--	1	1	-0.0460124	--	0.900684	0.965294	Similar to Male sterility MS5.
Os10g0160100	13.04	2.18333	13.7133	0.633333	2.03333	-2.57834	Down	0.0122724	0.0388507	2.65097	Up	0.00017655	0.00255688	-1.7855	--	0.3562	0.591182	-0.102686	--	0.935378	0.977578	Glycoside hydrolase family 17 protein.
Os01g0348000	112.77	18.9033	61.52	22.0367	10.0167	-2.57667	Down	1.01e-15	4.84e-14	1.70241	Up	0.000129747	0.00198629	0.221265	--	0.503791	0.716499	-0.916238	--	0.00235767	0.0195174	Similar to Papain-like cysteine proteinase (Fragment).
Os02g0542500	16.9833	2.85667	6.03333	1.16	1.18667	-2.57172	Down	2.48e-18	1.55e-16	1.07862	Up	0.00748587	0.0490104	-1.30021	--	0.00212461	0.0158496	-1.26742	--	0.000345766	0.00414685	Similar to NF-180.
Os06g0266800	58.8433	9.90667	45.1433	5.08333	11.9333	-2.57041	Down	1.02e-06	1.08e-05	2.18804	Up	7.26e-05	0.00123202	-0.962625	--	0.301307	0.537261	0.268525	--	0.812325	0.930431	Similar to Gibberellin-stimulated protein.
Os08g0469500	1.82	0.306667	1.95667	0.29	0.37	-2.5692	Down	0.000236697	0.00135423	2.67365	Up	0.000117689	0.00183375	-0.0806185	--	0.89911	0.955021	0.270854	--	0.893893	0.963013	Similar to F-box domain containing protein.
Os01g0710100	2.19333	0.37	1.93667	0.04	0.213333	-2.56753	Down	1.13e-05	9.15e-05	2.38798	Up	2.01e-06	5.91e-05	-3.20945	--	0.0281493	0.111487	-0.794416	--	0.536162	0.783773	Hypothetical conserved gene.
Os06g0160100	48.4467	8.18667	36.45	7.02	12	-2.56505	Down	1.3e-22	1.16e-20	2.15457	Up	7.13e-08	3.14e-06	-0.221805	--	0.710847	0.853893	0.551686	--	0.563214	0.799937	Similar to Histones H3 and H4 (ISS).
Os03g0767650	2.24333	0.383333	1.4	0.2	0.226667	-2.54897	Down	2.9e-06	2.77e-05	1.86876	Up	0.000283797	0.00377922	-0.938599	--	0.395521	0.627556	-0.758027	--	0.344412	0.63358	Hypothetical gene.
Os04g0517000	19.6	3.35	15.97	1.31333	2.96	-2.54862	Down	2.1e-19	1.44e-17	2.25313	Up	2.2e-07	8.5e-06	-1.35093	--	1	1	-0.178564	--	0.786402	0.918955	Similar to OSIGBa0145M07.3 protein.
Os07g0616200	6.17333	1.05667	5.45667	1.21	1.13667	-2.54653	Down	9.8e-11	2.31e-09	2.3685	Up	7.59e-19	1.95e-16	0.195487	--	0.756309	0.881407	0.105289	--	0.915616	0.970793	Similar to Beta-ketoacyl-ACP synthase.
Os02g0814300	13.2933	2.27667	13.5033	0.556667	3.37333	-2.54571	Down	2.32e-05	0.00017419	2.56832	Up	0.000226951	0.00315044	-2.03204	--	0.191987	0.409424	0.567252	--	0.713875	0.884814	Cytochrome c monohaem domain containing protein.
Os05g0480400	5.83667	1	3	0.296667	0.506667	-2.54514	Down	4.36e-13	1.46e-11	1.58496	Up	1.02e-05	0.000237026	-1.75309	--	0.000207208	0.0023755	-0.980891	--	0.15723	0.403826	Serine/threonine protein kinase domain containing protein.
Os10g0562550	2.33333	0.4	1.66667	0.106667	0.6	-2.54432	Down	1.29e-06	1.33e-05	2.05889	Up	0.000357287	0.00453284	-1.90689	--	0.260649	0.493856	0.584963	--	0.687594	0.872468	Hypothetical gene.
Os10g0132500	3.61333	0.62	1.55333	0.24	0.633333	-2.54299	Down	5.89e-09	9.97e-08	1.32503	Up	0.00324077	0.026024	-1.36923	--	0.0592371	0.188161	0.0306968	--	0.982209	0.99346	Hypothetical conserved gene.
Os08g0246300	0.99	0.17	0.53	0.0666667	0.23	-2.54189	Down	3.19e-05	0.000231529	1.64046	Up	0.00749395	0.0490202	-1.3505	--	0.391856	0.6243	0.436099	--	0.717652	0.88686	NB-ARC domain containing protein.
Os01g0833500	5.35	0.92	3.36	0.196667	0.766667	-2.53983	Down	6.1e-08	8.47e-07	1.86876	Up	0.000283083	0.00377139	-2.22588	--	0.131114	0.319247	-0.263034	--	0.741766	0.897351	Similar to Serine carboxypeptidase II-1 precursor (EC 3.4.16.6) (CP-MII.1) (Fragment).
Os05g0594200	3.79333	0.653333	2.66667	0.333333	0.793333	-2.53757	Down	7.94e-05	0.00051663	2.02915	Up	9.24e-05	0.00150241	-0.970854	--	0.224578	0.451134	0.280108	--	0.77891	0.915419	Similar to Cation/proton exchanger 1a.
Os06g0118600	2.99333	0.516667	2.5	0.76	0.876667	-2.53445	Down	3.72e-10	7.94e-09	2.27462	Up	2.89e-06	8.11e-05	0.556766	--	0.307677	0.543699	0.762795	--	0.199712	0.466046	Similar to Mov34/MPN/PAD-1 family protein.
Os11g0672700	0.77	0.133333	0.5	0.213333	0.2	-2.52982	Down	0.000126136	0.000774216	1.90689	Up	0.00108346	0.0109993	0.678072	--	0.575027	0.765721	0.584963	--	0.603201	0.825938	RecQ DNA helicase RNA silencing
Os05g0573200	7.09	1.23	3.52	0.443333	0.516667	-2.52713	Down	2.73e-07	3.35e-06	1.51692	Up	2.84e-05	0.000561366	-1.47219	--	1	1	-1.25135	--	0.192131	0.456074	Similar to Isocitrate dehydrogenase (Fragment).
Os01g0312500	4.24333	0.736667	3.51667	0.116667	0.2	-2.52611	Down	0.000305394	0.00168685	2.25512	Up	0.000766883	0.00833383	-2.65862	--	0.0831352	0.237461	-1.88101	--	0.0846741	0.274599	Similar to Pectinesterase.
Os11g0150400	4.75333	0.826667	5.08667	1.51	1.44333	-2.52356	Down	1.52e-05	0.00011985	2.62134	Up	6.52e-12	6.69e-10	0.869171	--	0.0699625	0.211042	0.804027	--	0.0750614	0.253498	Stress responsive alpha-beta barrel domain containing protein.
Os01g0935800	5.41667	0.943333	4.13	0.106667	0.323333	-2.52157	Down	3.01e-07	3.64e-06	2.1303	Up	1e-07	4.21e-06	-3.14466	--	0.0026024	0.0186393	-1.54475	--	0.0132144	0.0739553	Similar to BRASSINOSTEROID INSENSITIVE 1-associated receptor kinase 1.
Os06g0725700	7.68667	1.34	6.36333	0.176667	0.856667	-2.52013	Down	2.7e-05	0.000199198	2.24755	Up	0.000956951	0.0100163	-2.92313	--	0.0498928	0.167216	-0.645427	--	0.617034	0.834278	Protein of unknown function DUF241 plant family protein.
Os04g0147200	1.17	0.206667	1.56667	0.0533333	0.04	-2.50113	Down	0.000265411	0.00149548	2.92232	Up	1.25e-05	0.00028304	-1.9542	--	0.135119	0.325442	-2.36923	--	0.160609	0.408405	Protein of unknown function DUF594 domain containing protein.
Os03g0297800	10.3367	1.83333	6.66667	0.4	1.22333	-2.49523	Down	2.8e-10	6.13e-09	1.8625	Up	3.56e-05	0.000674108	-2.1964	--	0.042369	0.1491	-0.583652	--	0.440417	0.71577	Similar to Leucine Rich Repeat family protein expressed.
Os02g0719000	10.7667	1.91	4.33667	0.573333	0.483333	-2.49493	Down	9.97e-14	3.66e-12	1.18301	Up	0.00088401	0.00938406	-1.73613	--	1	1	-1.98248	--	0.00761804	0.0489483	Similar to Rho GDP-dissociation inhibitor 1 (Rho GDI-1) (AtRhoGDI1).
Os08g0434566	0.356667	0.0633333	0.21	0.03	0.0366667	-2.49354	Down	1.37e-05	0.000108702	1.72935	Up	0.00376565	0.0292223	-1.078	--	0.348915	0.584565	-0.788496	--	0.336925	0.626296	Hypothetical gene.
Os07g0636800	47.96	8.54	28.9433	3.19333	3.95333	-2.48952	Down	1.4e-11	3.8e-10	1.76092	Up	0.000371918	0.00469175	-1.41917	--	0.00116884	0.00985973	-1.11117	--	0.0384112	0.160773	Plant disease resistance response protein family protein.
Os02g0684100	20.5233	3.65667	15.5133	5.42	2.30333	-2.48866	Down	6.12e-13	2.01e-11	2.08491	Up	1.33e-06	4.12e-05	0.567764	--	0.318493	0.553647	-0.666806	--	0.0550596	0.206449	Sulfotransferase domain domain containing protein.
Os05g0382600	115.783	20.7533	66.1167	6.17	4.63	-2.48001	Down	2.51e-18	1.56e-16	1.67167	Up	1.23e-05	0.000278862	-1.75	--	1.1e-08	4.31e-07	-2.16426	--	7.97e-14	8.02e-12	Similar to Annexin-like protein RJ4.
Os02g0638200	3.96	0.71	2.97667	0.27	0.516667	-2.47961	Down	1.19e-08	1.9e-07	2.06781	Up	0.000134994	0.0020494	-1.39486	--	0.228183	0.455577	-0.458585	--	0.579897	0.810352	Similar to OSIGBa0115K01-H0319F09.22 protein.
Os06g0671800	12.3167	2.21667	6.04667	1.23333	1.25	-2.47415	Down	3.36e-13	1.14e-11	1.44775	Up	1.37e-05	0.000304021	-0.845829	--	0.261783	0.495072	-0.826464	--	0.20346	0.471876	Similar to patellin-5.
Os04g0413500	26.8333	4.83333	17.18	3.23	1.39667	-2.47294	Down	1.04e-10	2.44e-09	1.82964	Up	2.76e-06	7.8e-05	-0.581484	--	0.221698	0.447488	-1.79103	--	0.0148265	0.0808206	Cell-wall invertase Carbon partitioning during early grain filling
Os03g0756300	9.28667	1.67333	7.17333	2.20667	1.89333	-2.47244	Down	2.35e-11	6.13e-10	2.09992	Up	1.33e-07	5.42e-06	0.399144	--	0.714082	0.855808	0.178204	--	0.891949	0.962627	X8 domain containing protein.
Os03g0637800	1.38667	0.25	0.76	0.24	0.286667	-2.47162	Down	6.84e-10	1.39e-08	1.60407	Up	0.00131505	0.012847	-0.0588937	--	0.930008	0.967487	0.197446	--	0.848969	0.946192	Crinkly4 receptor-like kinase Epidermal cell differentiation Interlocking of the palea and lemma
Os12g0209300	1.62667	0.293333	0.836667	0.153333	0.18	-2.47131	Down	4.39e-06	3.99e-05	1.51211	Up	0.00256276	0.0216786	-0.93587	--	0.540303	0.742637	-0.704544	--	0.492209	0.753331	Similar to ATPase AAA family protein.
Os06g0575400	15.4367	2.78667	5.68667	0.696667	1.56333	-2.46975	Down	3.79e-15	1.69e-13	1.02904	Up	0.00457465	0.0337416	-2	--	0.0133296	0.0650301	-0.833915	--	0.173476	0.427994	Serine/threonine protein kinase-related domain containing protein.
Os07g0145400	3.56667	0.646667	1.79333	0.373333	0.466667	-2.46348	Down	1.93e-07	2.44e-06	1.47155	Up	0.00257736	0.0217732	-0.792558	--	0.734787	0.867887	-0.47063	--	0.560917	0.799149	Protein kinase core domain containing protein.
Os03g0214100	12.4067	2.25	9.69333	2.28	2.62333	-2.46312	Down	5.74e-15	2.5e-13	2.10707	Up	7.07e-14	9.48e-12	0.0191088	--	0.94896	0.97675	0.221476	--	0.795654	0.922953	Replication protein A1.
Os06g0634000	5.25333	0.953333	2.92	0.77	1.03	-2.46218	Down	5.86e-08	8.17e-07	1.61492	Up	0.00160355	0.0150196	-0.308122	--	0.712602	0.854915	0.111592	--	0.945723	0.981102	Conserved hypothetical protein.
Os07g0510400	21.7033	3.96333	10.07	1.07	1.58333	-2.45313	Down	2.83e-09	5.09e-08	1.34528	Up	0.00389805	0.0298837	-1.8891	--	0.013703	0.0662845	-1.32375	--	0.196061	0.460766	UDP-glucuronosyl/UDP-glucosyltransferase family protein.
Os08g0519100	22.8667	4.18333	13.98	1.58333	8.03667	-2.45052	Down	5.06e-09	8.7e-08	1.74064	Up	0.00520739	0.0373637	-1.40169	--	1	1	0.941944	--	0.606662	0.828149	D-arabinono-1 4-lactone oxidase domain containing protein.
Os04g0468600	336.737	61.6233	135.767	90.0433	83.02	-2.45007	Down	2.46e-08	3.7e-07	1.13958	Up	6.28e-06	0.000157099	0.547143	--	0.194966	0.413512	0.429982	--	0.0821421	0.269837	Hypothetical conserved gene.
Os08g0553100	0.636667	0.116667	0.563333	0.126667	0.203333	-2.44815	Down	0.000237568	0.00135809	2.2716	Up	0.00169374	0.0156875	0.118644	--	0.882213	0.946531	0.801454	--	0.352704	0.641715	Hypothetical conserved gene.
Os04g0583600	73.8733	13.54	48.7167	12.26	18.3367	-2.44783	Down	4.04e-20	2.91e-18	1.84719	Up	0.000122918	0.00189827	-0.143269	--	0.756613	0.881626	0.437504	--	0.60668	0.828149	Similar to Histone H4.
Os01g0922100	5.36	0.983333	3.26333	0.233333	0.49	-2.44648	Down	4.31e-06	3.92e-05	1.73059	Up	0.00251734	0.0213611	-2.07529	--	0.095861	0.260689	-1.0049	--	0.421716	0.701115	Conserved hypothetical protein.
Os06g0660200	7.80667	1.43333	4.87	0.396667	1.84667	-2.44533	Down	2.45e-06	2.38e-05	1.76455	Up	0.00101394	0.0104758	-1.85338	--	0.0407115	0.144913	0.365549	--	0.754109	0.903695	Auxin efflux transporter Polar auxin transport Control of canopy architecture
Os01g0347500	117.013	21.6	64.18	24.01	11.2067	-2.43757	Down	3.86e-15	1.72e-13	1.57109	Up	0.00037568	0.00473192	0.152604	--	0.623927	0.798235	-0.946674	--	0.000745342	0.00772429	Similar to Papain-like cysteine proteinase (Fragment).
Os02g0756600	17.6367	3.26	10.6667	1.21667	3.97333	-2.43563	Down	3.21e-10	6.95e-09	1.71017	Up	0.000719927	0.00793653	-1.42194	--	0.0653772	0.201481	0.285478	--	0.772254	0.912093	Similar to Phi-1 protein.
Os09g0395600	2.95667	0.546667	2.19333	0.656667	0.87	-2.43524	Down	1.81e-13	6.41e-12	2.00439	Up	6.05e-05	0.0010578	0.2645	--	1	1	0.670354	--	0.66172	0.859681	Concanavalin A-like lectin/glucanase domain containing protein.
Os06g0652600	16.9833	3.15	8.28	0.06	0.75	-2.4307	Down	4.73e-06	4.26e-05	1.39428	Up	0.00645859	0.043997	-5.71425	--	1.02e-07	3.21e-06	-2.07039	--	0.0644532	0.229099	Similar to Lustrin A.
Os04g0597866	2.68667	0.5	2.29667	0.37	0.326667	-2.42582	Down	3.8e-07	4.48e-06	2.19954	Up	2.31e-06	6.64e-05	-0.434403	--	0.593824	0.778146	-0.614109	--	0.589395	0.817169	Hypothetical gene.
Os05g0149500	3.87667	0.723333	2.03	1.02667	0.886667	-2.42208	Down	9.32e-10	1.86e-08	1.48875	Up	0.000534523	0.00627353	0.505235	--	0.555519	0.752472	0.293731	--	0.640407	0.848049	Similar to lipopolysaccharide-modifying protein.
Os01g0502700	15.6867	2.93	11.5333	2.76333	3.77	-2.42057	Down	2.79e-11	7.18e-10	1.97684	Up	6.98e-05	0.00119354	-0.0844911	--	0.833107	0.920861	0.363664	--	0.726818	0.890491	Similar to Histone H2A.
Os11g0104400	13.7167	2.56333	12.6833	1.20333	2.97	-2.41984	Down	2.37e-06	2.32e-05	2.30684	Up	2.7e-07	1.02e-05	-1.09098	--	0.14296	0.337938	0.212442	--	0.847987	0.945775	Similar to W-3 fatty acid desaturase.
Os11g0707600	37.02	6.93667	17.3867	8.23333	7.69667	-2.41599	Down	2.37e-13	8.21e-12	1.32567	Up	0.000129918	0.0019879	0.247234	--	0.468214	0.688641	0.149991	--	0.8244	0.934953	Similar to Sterol 4-alpha-methyl-oxidase (Fragment).
Os03g0748300	0.586667	0.11	1.02667	0.196667	0.09	-2.41504	Down	0.00444837	0.0167416	3.22239	Up	2.12e-05	0.000439586	0.838249	--	0.60006	0.781945	-0.289507	--	0.776613	0.91438	Aldose 1-epimerase family protein.
Os12g0601300	47.0167	8.81667	28.81	1.33	2.48	-2.41487	Down	5.16e-10	1.07e-08	1.70826	Up	2.94e-05	0.000578408	-2.72881	--	0.00155969	0.0124231	-1.82989	--	1	1	Similar to Auxin-responsive protein (Aux/IAA) (Fragment).
Os01g0648600	1.34667	0.253333	0.946667	0.223333	0.496667	-2.41028	Down	3.91e-08	5.66e-07	1.90182	Up	0.000647629	0.00728515	-0.181838	--	0.880787	0.945921	0.971241	--	0.203098	0.471228	Protein kinase catalytic domain domain containing protein.
Os08g0160500	116.06	21.8733	70.3	7.47333	7.71667	-2.40763	Down	9.61e-16	4.6e-14	1.68435	Up	1.6e-09	1.09e-07	-1.54935	--	0.00126265	0.0104976	-1.50312	--	2.39e-05	0.000420898	MLG (mixed-linkage glucan) synthase Biosynthesis of MLG (cell wall polysaccharide)
Os11g0644700	2.66333	0.503333	1.62333	0.156667	0.163333	-2.40365	Down	6.81e-05	0.000449761	1.68937	Up	0.00518128	0.0372202	-1.68382	--	0.192676	0.410479	-1.62369	--	0.0712614	0.244938	Plant disease resistance response protein family protein.
Os01g0765500	1.97	0.373333	1.51333	0.196667	0.37	-2.39966	Down	2.19e-08	3.33e-07	2.01919	Up	1.51e-05	0.000330603	-0.924712	--	0.467301	0.6878	-0.0129391	--	0.934746	0.97737	Conserved hypothetical protein.
Os01g0226200	2.33333	0.443333	1.99333	0.463333	0.783333	-2.39593	Down	1.44e-05	0.000114166	2.16872	Up	5.75e-07	1.97e-05	0.0636586	--	0.995306	0.997714	0.821235	--	0.414427	0.694742	Conserved hypothetical protein.
Os12g0628400	10.2233	1.94333	8.21667	0.76	1.59333	-2.39526	Down	9.67e-07	1.03e-05	2.08002	Up	8.74e-06	0.00020827	-1.35446	--	0.240233	0.470379	-0.286485	--	0.680568	0.868979	Fatty acid 2-hydroxylase Resistance to rice blast fungus infection
MSTRG.20652	12.1867	2.31667	8.79	0.196667	0.316667	-2.39518	Down	7.23e-08	9.9e-07	1.92381	Up	4.66e-05	0.000844689	-3.55823	--	0.000733859	0.00671821	-2.87101	--	0.00491099	0.0348139	--
Os04g0463000	5.96	1.13333	2.87333	1.09333	1.24333	-2.39474	Down	2.63e-13	9.08e-12	1.34215	Up	0.00449085	0.0333115	-0.0518389	--	0.878192	0.944417	0.133641	--	0.864478	0.952162	Serine/threonine protein kinase domain containing protein.
Os06g0203200	4.69	0.893333	2.48667	0.573333	0.526667	-2.39232	Down	9.19e-07	9.86e-06	1.47694	Up	0.00312711	0.0253644	-0.639824	--	0.41779	0.646475	-0.762308	--	0.28197	0.56864	Flavin-containing monooxygenase FMO family protein.
Os09g0400000	8.41	1.60333	7.49	1.69667	1.29333	-2.39103	Down	2.77e-11	7.14e-10	2.22389	Up	0.000237037	0.00326005	0.0816288	--	0.864706	0.937651	-0.30998	--	0.486009	0.748444	Cinnamyl alcohol dehydrogenase (EC 1.1.1.195).
Os04g0419600	12.0767	2.30667	7.79	2.07	3.18	-2.38834	Down	2.1e-11	5.5e-10	1.75581	Up	0.00044256	0.00538203	-0.156179	--	0.748949	0.876823	0.463217	--	0.649656	0.853811	Histone H3.
Os01g0225500	1.83	0.35	1.51667	0.0233333	0.09	-2.38642	Down	0.0021593	0.00909379	2.11548	Up	0.00245577	0.0209282	-3.90689	--	0.00711063	0.0404048	-1.95936	--	0.10617	0.317096	Similar to 3-methyl-2-oxobutanoate hydroxymethyltransferase.
Os04g0640700	51.1833	9.82667	36.0133	3.98	5.22	-2.3809	Down	1.17e-09	2.28e-08	1.87376	Up	3.02e-07	1.12e-05	-1.30393	--	0.0199032	0.0871698	-0.912652	--	0.118453	0.339195	Similar to Alpha-L-arabinofuranosidase/beta-D-xylosidase isoenzyme ARA-I.
Os02g0829100	8.55	1.64667	8.43	1.82	1.93667	-2.37638	Down	2.53e-12	7.56e-11	2.35598	Up	6.48e-08	2.88e-06	0.14439	--	0.851345	0.930617	0.234027	--	0.798031	0.923851	Replication protein A 30kDa.
Os09g0443800	1.88333	0.363333	1.99333	0.17	0.143333	-2.37392	Down	0.000278622	0.00156001	2.45582	Up	0.000257045	0.00347583	-1.09576	--	0.474196	0.693212	-1.34192	--	0.334709	0.623789	Conserved hypothetical protein.
Os01g0745400	4.40333	0.85	3.3	0.266667	0.576667	-2.37306	Down	3.28e-05	0.000237227	1.95693	Up	0.00486429	0.0354043	-1.67243	--	0.157959	0.360726	-0.559725	--	0.536619	0.783851	Sec34-like protein family protein.
Os06g0266400	81.38	15.7167	53.5133	7.27667	15.2967	-2.37238	Down	1.76e-11	4.68e-10	1.7676	Up	0.000132176	0.0020152	-1.11095	--	0.118019	0.298323	-0.039078	--	0.912926	0.969527	Similar to chemocyanin.
Os05g0430700	4.01667	0.776667	2.44	0.573333	0.756667	-2.37063	Down	1.57e-05	0.000122833	1.65151	Up	0.000317228	0.00413382	-0.437921	--	0.473236	0.692393	-0.0376377	--	0.867029	0.953122	Protein of unknown function DUF803 family protein.
Os01g0756900	16.26	3.15333	23.3667	1.3	3.56333	-2.36638	Down	4.39e-08	6.29e-07	2.8895	Up	1.51e-05	0.000330603	-1.27837	--	0.241357	0.471651	0.17635	--	0.928491	0.975203	Hypothetical protein.
Os05g0436100	7.76667	1.50667	5.39333	0.316667	0.733333	-2.36594	Down	9.4e-06	7.8e-05	1.83982	Up	0.00076355	0.00830975	-2.25032	--	0.328842	0.56412	-1.03882	--	0.364666	0.65332	Similar to predicted protein.
Os10g0109900	5.27	1.02333	2.53333	0.0733333	0.143333	-2.36453	Down	6.83e-12	1.93e-10	1.30776	Up	0.000308002	0.00403302	-3.80266	--	0.00129399	0.0106946	-2.83583	--	1.42e-05	0.000267814	Major facilitator superfamily general substrate transporter domain containing protein.
Os02g0797400	7.74	1.50333	5.30333	1.64333	1.65	-2.36417	Down	1.67e-14	6.82e-13	1.81873	Up	1.45e-08	7.55e-07	0.12846	--	0.900097	0.955513	0.134301	--	0.909983	0.968445	MCM family protein.
Os05g0337400	4.45333	0.866667	2.53667	0.713333	1.14	-2.36134	Down	2.25e-07	2.8e-06	1.54938	Up	0.00490138	0.0356394	-0.280901	--	0.700948	0.847969	0.395485	--	0.631329	0.8421	Similar to heavy-metal-associated domain-containing protein.
MSTRG.31747	1.23	0.24	1.23667	0.213333	0.283333	-2.35755	Down	0.00730844	0.0253133	2.36535	Up	0.00519818	0.0373146	-0.169925	--	0.900208	0.955513	0.239466	--	0.922192	0.973921	--
Os03g0856300	10.5167	2.06	7.58	1.61667	1.59333	-2.35196	Down	1.37e-10	3.16e-09	1.87955	Up	1.2e-05	0.000272784	-0.349622	--	0.40197	0.632773	-0.370596	--	0.502386	0.7603	Similar to Acyl carrier protein III chloroplast precursor (ACP III).
Os06g0160000	45.69	8.95667	42.1667	12.9433	16.2133	-2.35084	Down	8e-14	2.96e-12	2.23507	Up	2.3e-07	8.82e-06	0.531175	--	0.463537	0.685015	0.856147	--	0.336719	0.626182	Hypothetical protein.
Os03g0861400	24.34	4.78667	11.3033	0.71	0.68	-2.34624	Down	5.35e-12	1.54e-10	1.23966	Up	0.0069807	0.0465742	-2.75313	--	2.22e-06	4.92e-05	-2.81541	--	0.000497441	0.00559904	Hypothetical conserved gene.
Os12g0554800	7.37	1.45	4.24	0.62	0.66	-2.34561	Down	4.21e-07	4.91e-06	1.54801	Up	0.00102807	0.0105765	-1.22571	--	0.16	0.363696	-1.13551	--	0.0980245	0.300593	Similar to Polygalacturonase-like protein.
Os05g0139100	4.62	0.91	1.98333	0.266667	0.186667	-2.34395	Down	2.69e-16	1.36e-14	1.12399	Up	0.00136895	0.0132129	-1.77083	--	0.00197783	0.0149699	-2.2854	--	1.85e-06	4.58e-05	Helix-loop-helix DNA-binding domain containing protein.
Os01g0710700	12.47	2.45667	5.80667	1.75667	1.44333	-2.34369	Down	1.37e-20	1.03e-18	1.24101	Up	0.000960648	0.0100366	-0.483862	--	0.0903239	0.251001	-0.767298	--	0.00146205	0.013275	Lipase class 3 family protein.
Os01g0914200	2.97667	0.586667	1.74667	0.446667	0.613333	-2.34308	Down	1.97e-09	3.68e-08	1.57399	Up	0.000668706	0.00747986	-0.393342	--	0.39679	0.628603	0.0641303	--	0.974713	0.990971	Hypothetical protein.
Os04g0201800	2.34667	0.463333	2.18667	0.0366667	0.05	-2.34049	Down	0.000906595	0.00434306	2.23861	Up	7.98e-05	0.00133108	-3.65951	--	0.0124306	0.0616666	-3.21205	--	0.00179469	0.0157186	Similar to H0512B01.7 protein.
Os07g0474300	2.39667	0.473333	2.17333	0.11	0.576667	-2.3401	Down	1.35e-05	0.000107687	2.19898	Up	0.000324012	0.00420566	-2.10535	--	0.173597	0.38369	0.284881	--	0.874694	0.955978	Conserved hypothetical protein.
Os03g0780800	18.9733	3.75	13.9033	1.77333	2.55	-2.33901	Down	3.91e-06	3.61e-05	1.89047	Up	0.000407073	0.00506097	-1.08043	--	0.145647	0.342063	-0.556393	--	0.451296	0.723968	Fatty acid 2-hydroxylase Resistance to rice blast fungus infection
Os07g0408500	3.44333	0.683333	2.41333	0.266667	0.343333	-2.33314	Down	2.21e-09	4.08e-08	1.82037	Up	4.39e-06	0.000115727	-1.35755	--	0.3658	0.600041	-0.99298	--	0.22438	0.501224	Similar to Rac GTPase activating protein 3 (Fragment).
Os04g0357300	0.436667	0.0866667	0.426667	0.16	0.0966667	-2.33298	Down	0.00729492	0.025272	2.29956	Up	0.00521202	0.0373753	0.884523	--	0.461333	0.683405	0.157541	--	0.984688	0.994402	Similar to Helicase-like protein [Oryza sativa (japonica cultivar-group)].
Os09g0556800	4.45	0.89	3.45333	0.306667	0.436667	-2.32193	Down	2.26e-06	2.21e-05	1.95611	Up	4.27e-05	0.000784302	-1.53713	--	0.227923	0.45549	-1.02727	--	0.399823	0.682296	Conserved hypothetical protein.
Os11g0614400	46.73	9.38667	27.5833	2.06333	3.47667	-2.31566	Down	5.8e-12	1.65e-10	1.55511	Up	2.08e-05	0.00043118	-2.18564	--	5.07e-09	2.12e-07	-1.43291	--	0.01553	0.0835595	Similar to Patatin-like protein 1.
Os07g0520800	8.6	1.73333	4.45	2.13333	1.64333	-2.31079	Down	3.15e-08	4.64e-07	1.36026	Up	0.000271361	0.00363639	0.29956	--	0.628507	0.800856	-0.076924	--	0.777312	0.914731	Ankyrin repeat-containing domain domain containing protein.
Os12g0194600	3.24	0.653333	2.18667	0.236667	0.703333	-2.3101	Down	5.44e-07	6.2e-06	1.74284	Up	0.000500877	0.00595849	-1.46496	--	0.0492173	0.165707	0.106389	--	0.951318	0.983014	Similar to DNA binding protein.
Os03g0111200	54.23	10.9367	26.9067	7.58667	8.20333	-2.30992	Down	2.38e-15	1.08e-13	1.29879	Up	0.000247745	0.00337614	-0.527635	--	0.108754	0.282699	-0.414891	--	0.150533	0.393588	Similar to Remorin.
Os02g0742800	5.30333	1.07	3.3	1.35333	1.22	-2.30929	Down	5.48e-13	1.81e-11	1.62486	Up	7.19e-08	3.15e-06	0.338906	--	0.480339	0.698686	0.18927	--	0.770633	0.911498	Conserved hypothetical protein.
Os01g0347600	215.647	43.5467	126.297	69.0133	36.61	-2.30804	Down	7.87e-12	2.2e-10	1.53618	Up	0.000861754	0.00922675	0.664313	--	0.0354106	0.13137	-0.250325	--	0.344652	0.633701	Ervatamin B (EC 3.4.22.-) (ERV-B).
Os05g0425000	1.45	0.293333	0.983333	0.143333	0.293333	-2.30544	Down	0.000528417	0.00271894	1.74514	Up	0.00414461	0.0313382	-1.03317	--	0.514112	0.724277	3.20343e-16	--	0.966712	0.988368	Hypothetical conserved gene.
Os03g0667500	6.06	1.22667	4.24	2.27333	2.07667	-2.30457	Down	3.58e-10	7.67e-09	1.78932	Up	0.000515027	0.00609032	0.890066	--	0.194097	0.412461	0.759526	--	0.21619	0.48963	Similar to Metal transport protein.
Os05g0476200	7.19	1.45667	5.46333	1.66667	1.47667	-2.30332	Down	8.07e-14	2.98e-12	1.90711	Up	2.4e-10	1.92e-08	0.194295	--	0.86536	0.938085	0.0196734	--	0.950613	0.982875	Similar to DNA replication licensing factor MCM3 homolog (Replication origin activator) (ROA protein) (Fragment).
Os03g0114000	4	0.813333	2.56333	0.696667	0.573333	-2.29808	Down	3.02e-06	2.87e-05	1.6561	Up	3.66e-06	9.92e-05	-0.223378	--	0.762125	0.884158	-0.504473	--	0.440079	0.715531	Similar to Kinesin.
Os03g0202001	6.91667	1.40667	5	1.83333	1.26	-2.2978	Down	6.84e-10	1.39e-08	1.82965	Up	1.02e-07	4.27e-06	0.382189	--	0.526805	0.73403	-0.158857	--	0.626236	0.839831	Similar to Adenylyl-sulfate kinase.
Os07g0250900	13.5	2.75	6.43	0.993333	1.1	-2.29546	Down	7.16e-13	2.34e-11	1.22539	Up	0.00089412	0.00947786	-1.46908	--	0.000870829	0.00775966	-1.32193	--	0.0437152	0.176326	Harpin-induced 1 domain containing protein.
Os05g0512600	68.6867	14	64.75	8.80667	15.8667	-2.2946	Down	3.06e-07	3.7e-06	2.20945	Up	3.45e-07	1.25e-05	-0.668759	--	0.358886	0.593258	0.180572	--	0.878611	0.957374	X8 domain containing protein.
Os01g0513900	4.50333	0.923333	3	0.64	0.53	-2.28607	Down	8.77e-10	1.76e-08	1.70004	Up	4.72e-08	2.17e-06	-0.52878	--	0.73208	0.866034	-0.800859	--	0.346626	0.635758	Similar to Kinesin heavy chain (Fragment).
Os06g0159450	60.1967	12.3933	39.1667	10.3067	15.0367	-2.28012	Down	8.35e-26	9.33e-24	1.66006	Up	4.41e-05	0.000807284	-0.265986	--	0.623385	0.797923	0.278921	--	0.744042	0.898518	Similar to Histone H3.
Os05g0497150	4.99667	1.03	3.12333	0.76	0.893333	-2.27832	Down	1.59e-08	2.48e-07	1.60044	Up	1.96e-05	0.000412063	-0.438573	--	0.475484	0.694335	-0.205374	--	0.569782	0.80346	Hypothetical conserved gene.
Os05g0167600	11.54	2.38	9.78667	1.55667	1.79333	-2.27761	Down	9.92e-08	1.32e-06	2.03986	Up	2.71e-07	1.02e-05	-0.612502	--	0.79407	0.901282	-0.408318	--	0.63131	0.8421	Conserved hypothetical protein.
Os08g0490900	82.0467	16.9833	48.9067	15.39	19.67	-2.27233	Down	2.39e-17	1.33e-15	1.52591	Up	0.000215968	0.0030319	-0.142126	--	0.700322	0.847687	0.211877	--	0.81148	0.930314	Similar to Histone H2B.2.
Os01g0509900	1.73667	0.36	1.21667	0.196667	0.26	-2.27025	Down	2.59e-06	2.49e-05	1.75687	Up	6.36e-05	0.00110261	-0.872244	--	0.371399	0.605211	-0.469485	--	0.57686	0.808418	F-box domain Skp2-like domain containing protein.
Os02g0258250	26.48	5.49	14.6567	2.89667	2.84333	-2.27003	Down	3.84e-16	1.9e-14	1.41668	Up	0.000223277	0.00311104	-0.922412	--	0.357779	0.592165	-0.949223	--	0.199688	0.466046	Hypothetical conserved gene.
Os05g0493500	10.69	2.22333	8.82667	1.32333	1.97333	-2.26547	Down	6.09e-12	1.73e-10	1.98914	Up	1.1e-09	7.78e-08	-0.748548	--	0.652293	0.818029	-0.17209	--	0.809787	0.929592	Similar to Cyclin-B1-5.
Os06g0156600	46.18	9.62667	21.53	1.17	1.62667	-2.26216	Down	4.84e-13	1.61e-11	1.16124	Up	0.00340586	0.0270218	-3.04053	--	0.000361004	0.00377083	-2.56512	--	0.000640209	0.00682686	Lipase GDSL domain containing protein.
Os09g0314333	5.78333	1.20667	3.15333	0.823333	1.18	-2.26087	Down	1.87e-10	4.22e-09	1.38585	Up	0.000231913	0.00321034	-0.551479	--	0.237311	0.466675	-0.0322403	--	0.871573	0.954804	UAA transporter family protein.
Os03g0210500	13.0467	2.72667	9.03333	1.43333	1	-2.25847	Down	2.56e-06	2.47e-05	1.72812	Up	0.000634778	0.00717583	-0.927764	--	0.262879	0.496253	-1.44714	--	0.0797863	0.264519	Protein of unknown function DUF538 family protein.
Os02g0810200	4.86	1.01667	3.64333	0.686667	0.586667	-2.25711	Down	3.24e-08	4.77e-07	1.84141	Up	5.06e-09	3e-07	-0.566165	--	1	1	-0.793234	--	0.3426	0.632136	Kinesin-related protein Regulation of cell division and plant development
Os12g0638100	4.11	0.86	2.72	0.436667	0.406667	-2.25673	Down	4.45e-10	9.32e-09	1.6612	Up	2.36e-06	6.76e-05	-0.977804	--	1	1	-1.08049	--	0.35283	0.641793	Similar to Receptor-like protein kinase.
Os01g0860900	1.91	0.4	2.59	0.28	0.376667	-2.2555	Down	0.0010014	0.00471661	2.69488	Up	0.000137748	0.00207991	-0.514573	--	0.568113	0.76095	-0.0867116	--	0.869198	0.954228	Conserved hypothetical protein.
Os08g0479300	5.37667	1.12667	2.49	0.453333	0.48	-2.25465	Down	1.49e-11	4.01e-10	1.14408	Up	0.00349896	0.0276353	-1.31342	--	0.565175	0.759125	-1.23095	--	0.150088	0.393165	Cyclin A/B/D/E domain containing protein.
Os05g0178300	22.2067	4.65667	16.09	0.99	0.71	-2.25362	Down	5.99e-12	1.71e-10	1.78879	Up	2.89e-07	1.08e-05	-2.2338	--	3.34e-05	0.000515288	-2.71341	--	1.54e-05	0.000287811	Similar to Cadmium tolerant 1.
Os07g0529700	24.1767	5.08333	18.4933	1.28667	2.52	-2.24977	Down	5.45e-05	0.000370255	1.86316	Up	0.00148229	0.0140697	-1.98214	--	0.00365347	0.0242765	-1.01235	--	0.239176	0.518549	Similar to Xyloglucan endotransglucosylase/hydrolase 1.
Os12g0533400	1.55	0.326667	1.2	0.636667	0.4	-2.24638	Down	6.25e-05	0.00041736	1.87714	Up	0.000383697	0.00482066	0.962719	--	0.158238	0.361198	0.292181	--	0.869544	0.954446	Similar to Rac GTPase activating protein 1.
Os01g0242200	5.04333	1.06333	2.53667	0.91	0.726667	-2.24578	Down	7.12e-12	2e-10	1.25434	Up	0.00319047	0.0257242	-0.224655	--	0.725093	0.862232	-0.549228	--	0.430774	0.708152	Zinc finger C2H2-type domain containing protein.
Os11g0484300	9.40333	1.98333	6.66667	2.58667	2.32333	-2.24525	Down	3.72e-11	9.38e-10	1.74904	Up	1.09e-09	7.73e-08	0.383167	--	0.56641	0.760009	0.228269	--	0.722873	0.88871	Similar to Mcm2-prov protein.
Os04g0405500	6.23333	1.31667	5.6	0.61	1.69333	-2.24311	Down	9.73e-06	8.03e-05	2.08854	Up	7.26e-05	0.001232	-1.11001	--	0.216484	0.440894	0.362976	--	0.750551	0.902053	Conserved hypothetical protein.
Os01g0972900	2.80667	0.593333	2.11667	0.2	0.446667	-2.24194	Down	8.57e-06	7.2e-05	1.83488	Up	0.000252945	0.00343286	-1.56884	--	0.296601	0.532419	-0.409644	--	0.671682	0.864575	Similar to Clone ZZD405 mRNA sequence. (Fragment).
Os02g0258200	26.87	5.68333	17.23	2.71333	3.63333	-2.24119	Down	3.7e-12	1.08e-10	1.60011	Up	9.19e-05	0.00149661	-1.06667	--	0.204369	0.425981	-0.645444	--	0.413443	0.693954	Similar to high mobility group family.
Os02g0714200	28.9533	6.13667	23.0533	4.52667	6.29333	-2.2382	Down	1.95e-06	1.93e-05	1.90945	Up	6.25e-07	2.11e-05	-0.439006	--	0.471189	0.690832	0.0363691	--	0.96949	0.989313	Similar to Pyrophosphate--fructose 6-phosphate 1-phosphotransferase alpha subunit (EC 2.7.1.90) (PFP) (6-phosphofructokinase pyrophosphate dependent) (Pyrophosphate-dependent 6-phosphofructose-1-kinase) (PPi-PFK).
Os03g0165400	11.3533	2.41333	6.83	1.80333	1.71333	-2.23402	Down	1.27e-10	2.93e-09	1.50086	Up	9.81e-05	0.00157486	-0.420361	--	0.565544	0.759367	-0.494221	--	0.422609	0.701923	Similar to Relative to SR12 protein (Fragment).
Os02g0753300	192.237	40.8833	128.823	40.3533	28.5533	-2.2333	Down	1.8e-10	4.08e-09	1.65581	Up	2.72e-05	0.000540846	-0.018825	--	0.936035	0.970811	-0.517854	--	0.155949	0.401971	Lipoxygenase LH2 domain containing protein.
Os03g0607600	2.61667	0.556667	2.58333	0.473333	0.73	-2.23284	Down	2.19e-08	3.33e-07	2.21435	Up	3.55e-08	1.68e-06	-0.233957	--	0.762669	0.884208	0.391083	--	0.573132	0.805902	Similar to Cyclin-A3-1.
Os03g0672400	6.41	1.36667	4.18	0.643333	0.643333	-2.22966	Down	4.07e-10	8.62e-09	1.61284	Up	6.73e-08	2.98e-06	-1.08702	--	1	1	-1.08702	--	0.165905	0.417271	Conserved hypothetical protein.
Os07g0112700	96.11	20.5	66.1133	11.4533	19.4267	-2.22906	Down	3.91e-07	4.6e-06	1.68932	Up	0.000266134	0.00358115	-0.839856	--	0.0740599	0.218976	-0.0775855	--	0.82573	0.935202	Cupredoxin domain containing protein.
Os02g0175400	22.13	4.73333	16.8033	6.44667	5.89667	-2.22508	Down	1.21e-10	2.81e-09	1.82782	Up	7.01e-10	5.19e-08	0.445697	--	0.313001	0.548958	0.317043	--	0.454362	0.725805	Similar to Vacuolar H(+)-ATPase subunit A (Fragment).
Os10g0453900	12.1333	2.6	10.3967	0.38	5	-2.22239	Down	0.000347543	0.00188768	1.99954	Up	0.00584162	0.0407744	-2.77444	--	0.00230134	0.0169197	0.943416	--	0.444106	0.718424	Eggshell protein family protein.
Os06g0589800	7.02667	1.50667	3.26	0.963333	1.30667	-2.22148	Down	2.12e-14	8.5e-13	1.11351	Up	0.00293744	0.024135	-0.645253	--	1	1	-0.205469	--	0.765146	0.908816	Protein kinase core domain containing protein.
Os06g0681600	65.07	14.0067	47.5633	4.44	5.79333	-2.21588	Down	3.45e-09	6.1e-08	1.76374	Up	1.57e-06	4.75e-05	-1.65748	--	7.27e-05	0.00100135	-1.27365	--	0.00744076	0.048168	Haem peroxidase family protein.
Os01g0166500	10.62	2.29	4.86	0.406667	1.81667	-2.21336	Down	2.56e-11	6.64e-10	1.08561	Up	0.00724908	0.0478494	-2.49343	--	0.0758351	0.22264	-0.334054	--	0.724742	0.889477	Conserved hypothetical protein.
Os03g0609000	0.476667	0.103333	0.496667	0.15	0.13	-2.20568	Down	0.00461775	0.0172587	2.26497	Up	0.00189385	0.0171246	0.537657	--	0.613981	0.791405	0.331206	--	0.817649	0.932476	Peptidase trypsin-like serine and cysteine domain containing protein.
Os05g0207400	5.22667	1.13333	3.60667	1.64	1.72667	-2.20532	Down	1.17e-07	1.54e-06	1.67009	Up	0.00338211	0.0268764	0.533124	--	0.393869	0.626278	0.607417	--	0.336992	0.626382	Zinc finger RING/FYVE/PHD-type domain containing protein.
Os07g0568700	94.3833	20.5167	62.0167	6.34333	13.8833	-2.20174	Down	3.75e-05	0.000266661	1.59586	Up	0.00459658	0.0338698	-1.69348	--	0.354324	0.589331	-0.563442	--	0.60508	0.827235	Polygalacturonase-inhibiting protein Inhibitor of fungal polygalacturonase Regulation of floral organ number
Os10g0554001	0.843333	0.183333	0.623333	0.136667	0.196667	-2.20163	Down	4.24e-05	0.000296572	1.76553	Up	0.00284105	0.0235427	-0.423808	--	0.707136	0.852194	0.101283	--	0.958135	0.985655	Conserved hypothetical protein.
Os10g0457400	3.32	0.723333	3.14	0.536667	0.726667	-2.19845	Down	3.53e-06	3.29e-05	2.11803	Up	3.1e-05	0.000602357	-0.430634	--	0.530603	0.736381	0.00663309	--	0.946963	0.981508	Similar to shugoshin-1.
Os01g0896400	26.5033	5.78	22.94	2.28333	3.93667	-2.19703	Down	8.7e-07	9.39e-06	1.98872	Up	2.7e-05	0.000538999	-1.33993	--	0.217378	0.441767	-0.554095	--	0.546299	0.790082	Similar to JHL23J11.5 protein.
Os04g0672300	6.37333	1.39	5.62333	0.56	0.45	-2.19696	Down	5.26e-05	0.000358249	2.01634	Up	0.000110928	0.001745	-1.31159	--	0.301912	0.537998	-1.62709	--	0.0927075	0.290792	Similar to H0322F07.3 protein.
Os12g0548501	87.84	19.16	101.92	7.46333	10.4367	-2.19678	Down	1.18e-08	1.89e-07	2.41127	Up	3.16e-09	1.97e-07	-1.36021	--	0.0181905	0.0814143	-0.876437	--	0.130626	0.361177	Similar to CI2C.
Os09g0482761	18.2567	3.99333	14.71	1.95667	4.99333	-2.19276	Down	4.12e-05	0.000289874	1.88113	Up	0.000440331	0.0053603	-1.0292	--	0.106311	0.278637	0.32241	--	0.717676	0.88686	Conserved hypothetical protein.
Os04g0314500	1.11	0.243333	1.40667	0.116667	0.176667	-2.18955	Down	0.00381583	0.0146895	2.53127	Up	5.4e-06	0.000138625	-1.06054	--	0.336133	0.57178	-0.461904	--	0.702137	0.878898	Hypothetical protein.
Os12g0431300	5.94667	1.30667	3.37333	0.633333	1.20333	-2.18619	Down	8.28e-14	3.05e-12	1.36828	Up	2.96e-05	0.000580312	-1.04485	--	0.00494743	0.0305239	-0.118855	--	0.546045	0.789979	Six-bladed beta-propeller TolB-like domain containing protein.
Os01g0190500	2.60667	0.573333	1.88	0.433333	0.996667	-2.18476	Down	4.1e-06	3.76e-05	1.71329	Up	0.00103984	0.010651	-0.403897	--	0.49403	0.709239	0.797737	--	0.270513	0.555995	IQ calmodulin-binding region domain containing protein.
Os06g0675200	5.76667	1.27	3.86667	0.19	1.03667	-2.18291	Down	6.14e-12	1.74e-10	1.60626	Up	0.00126127	0.0124027	-2.74076	--	0.00938151	0.0497624	-0.292876	--	0.784343	0.918361	Conserved hypothetical protein.
Os10g0394200	4.54	1.01	3.85	0.826667	0.893333	-2.16834	Down	1.54e-07	1.99e-06	1.9305	Up	7.73e-07	2.55e-05	-0.288978	--	0.532847	0.73789	-0.177085	--	0.767843	0.910158	Similar to subtilase family protein.
Os06g0278450	1.00333	0.223333	0.976667	0.22	0.33	-2.16753	Down	0.00668232	0.0235189	2.12867	Up	0.00398157	0.0303754	-0.0216951	--	0.950285	0.977227	0.563267	--	0.627649	0.840474	Hypothetical gene.
Os08g0434632	5.22	1.16333	3.91667	0.8	1.01333	-2.16579	Down	1.7e-07	2.17e-06	1.75136	Up	3.54e-07	1.28e-05	-0.540193	--	0.243427	0.474393	-0.199156	--	0.559057	0.797834	Conserved hypothetical protein.
Os01g0968400	15.4233	3.44667	9.03	1.89333	1.99	-2.16184	Down	2.94e-07	3.57e-06	1.38952	Up	0.00303817	0.0247848	-0.864273	--	1	1	-0.792433	--	1	1	Root cap family protein.
Os02g0816400	4.05333	0.906667	2.51	0.59	0.9	-2.16046	Down	3.4e-06	3.19e-05	1.46904	Up	0.000365924	0.00462076	-0.619857	--	0.371676	0.605427	-0.0106472	--	0.903143	0.966099	Protein of unknown function DUF3741 domain containing protein.
Os03g0712100	1.62333	0.363333	1.50333	0.276667	0.34	-2.15959	Down	7.98e-05	0.000519244	2.0488	Up	8.77e-05	0.00144121	-0.393145	--	0.778821	0.892791	-0.095759	--	0.905062	0.966792	Cell division cycle-associated protein domain containing protein.
Os04g0467901	3.91667	0.876667	2.43	0.883333	0.96	-2.15953	Down	1.9e-06	1.89e-05	1.47086	Up	1.8e-05	0.000382882	0.0109296	--	0.956756	0.9812	0.131006	--	0.907143	0.967396	Plant-specific kinesin-14 Processive minus-end-directed microtubule motor
Os10g0438500	1.69667	0.38	1.35333	0.163333	0.54	-2.15863	Down	9.18e-06	7.64e-05	1.83245	Up	0.000123002	0.00189827	-1.21818	--	0.434989	0.662081	0.50696	--	0.63116	0.842041	Cyclin-like F-box domain containing protein.
Os04g0563900	2.51333	0.563333	1.49333	0.323333	0.27	-2.15754	Down	2.07e-08	3.17e-07	1.40648	Up	0.00326709	0.0261931	-0.800967	--	0.497953	0.711815	-1.06103	--	0.176366	0.432698	Similar to H0409D10.5 protein.
Os01g0607900	17.6067	3.94667	12.84	2.48667	3.36667	-2.15742	Down	2.07e-15	9.42e-14	1.70194	Up	3.37e-09	2.1e-07	-0.666422	--	0.161446	0.36574	-0.229314	--	0.584035	0.813115	Serine/threonine protein kinase-related domain containing protein.
Os08g0538700	1.84333	0.413333	1.53667	0.473333	0.646667	-2.15694	Down	1.93e-07	2.44e-06	1.89443	Up	2.72e-08	1.34e-06	0.195551	--	0.760194	0.883352	0.645717	--	0.176021	0.432202	Retinoblastoma-related protein.
Os04g0530900	9.03667	2.03	7.53	0.633333	0.95	-2.15431	Down	1.02e-07	1.35e-06	1.89117	Up	1.12e-05	0.000257827	-1.68044	--	0.0241903	0.100148	-1.09548	--	0.0710435	0.244405	Glycosyl transferase family 8 protein.
Os01g0191800	9.2	2.07333	7.51333	1.44333	1.56667	-2.14968	Down	2.25e-08	3.42e-07	1.8575	Up	1.56e-08	8.06e-07	-0.522548	--	0.561111	0.756273	-0.404254	--	0.586572	0.815331	Similar to Aurora kinase.
Os06g0163900	1.46333	0.33	1.01333	0.26	0.38	-2.14872	Down	1.51e-06	1.53e-05	1.61857	Up	0.000351804	0.00447663	-0.343954	--	0.627768	0.80049	0.203533	--	0.773897	0.913092	Conserved hypothetical protein.
Os09g0426500	11.64	2.63	6.85333	0.556667	0.413333	-2.14596	Down	7.29e-07	8.05e-06	1.38174	Up	0.000330497	0.00427307	-2.24018	--	0.0354767	0.131511	-2.66969	--	1.23e-05	0.00023738	Similar to Integral membrane protein DUF6 containing protein.
Os04g0639100	7.03667	1.59	5.45667	0.62	2.90333	-2.14587	Down	9.13e-08	1.23e-06	1.77899	Up	0.00255056	0.0216061	-1.35869	--	0.275637	0.510195	0.868683	--	0.550654	0.793074	Conserved hypothetical protein.
Os03g0339700	5.15333	1.16667	3.60667	0.553333	0.706667	-2.14311	Down	1.09e-09	2.14e-08	1.62827	Up	1.78e-05	0.0003795	-1.07617	--	0.262012	0.495376	-0.723291	--	0.407476	0.688164	Protein of unknown function DUF827 plant family protein.
Os01g0805900	153.027	34.6567	176.74	27.9333	30.5833	-2.14258	Down	5.23e-08	7.4e-07	2.35042	Up	4.47e-09	2.68e-07	-0.311145	--	0.444833	0.67009	-0.180387	--	0.602528	0.825455	Tubulin beta-2 chain (Beta-2 tubulin).
Os12g0242900	2.48667	0.563333	2.20333	0.57	0.533333	-2.14215	Down	5.85e-08	8.16e-07	1.96763	Up	4.24e-07	1.51e-05	0.0169731	--	0.993939	0.997261	-0.0789513	--	0.824982	0.935061	DNA polymerase alpha subunit B domain containing protein.
Os10g0147400	11.5467	2.61667	8.04333	1.03	1.50667	-2.14167	Down	2.37e-10	5.28e-09	1.62006	Up	3.94e-06	0.000105797	-1.34509	--	1	1	-0.79637	--	0.30811	0.596526	Similar to Auxin influx carrier protein.
Os10g0550750	0.866667	0.196667	0.773333	0.14	0.246667	-2.13972	Down	0.0045617	0.0170933	1.97534	Up	0.00542377	0.0385345	-0.490326	--	0.750359	0.877496	0.32681	--	0.847432	0.945622	Protein of unknown function DUF3527 domain containing protein.
Os02g0550800	3.48	0.79	2.18333	0.726667	0.8	-2.13916	Down	1.28e-14	5.33e-13	1.46661	Up	3.47e-06	9.48e-05	-0.120559	--	0.823574	0.916135	0.0181473	--	0.931304	0.976238	Ammonium transporter family protein.
Os11g0678200	7.00333	1.59	5.44	1	0.603333	-2.13901	Down	7.67e-06	6.54e-05	1.77458	Up	7.19e-05	0.0012225	-0.669027	--	0.503176	0.716218	-1.398	--	0.0709336	0.244117	Conserved hypothetical protein.
Os03g0691500	1.20333	0.273333	0.833333	0.256667	0.143333	-2.1383	Down	0.000192815	0.0011278	1.60823	Up	7.64e-05	0.00128383	-0.0907655	--	0.889079	0.950075	-0.931287	--	0.266846	0.551607	Hypothetical conserved gene.
Os04g0496300	48.29	10.9933	42.3333	5.21667	7.60667	-2.1351	Down	2.96e-08	4.38e-07	1.94517	Up	1.47e-05	0.000322415	-1.07543	--	0.389023	0.621908	-0.531293	--	0.686882	0.872385	Similar to H0306B06.4 protein.
Os11g0546500	9.61	2.19333	5.25	0.81	0.606667	-2.13141	Down	2.86e-10	6.25e-09	1.25919	Up	0.000614336	0.00699788	-1.43713	--	0.0500335	0.167445	-1.85415	--	0.000499454	0.00561333	Galactosyl transferase family protein.
Os09g0241100	2.67	0.61	1.98667	0.443333	0.673333	-2.12996	Down	2.45e-06	2.38e-05	1.70347	Up	0.000173405	0.00252111	-0.460417	--	0.466703	0.687268	0.142512	--	0.890089	0.9614	Similar to nucleotide binding.
Os11g0118600	3.10667	0.71	1.75	0.6	0.546667	-2.12948	Down	1.42e-11	3.83e-10	1.30146	Up	0.000411769	0.0051023	-0.242857	--	0.634476	0.805393	-0.377158	--	0.434597	0.711606	Protein of unknown function DUF1191 family protein.
Os03g0184500	4.24	0.97	3.29667	0.993333	0.69	-2.12801	Down	1.96e-05	0.000149962	1.76495	Up	0.000957357	0.0100163	0.0342932	--	0.968663	0.987023	-0.491388	--	0.520469	0.773277	Transcriptional factor B3 family protein.
Os12g0502300	3.70667	0.85	2.32667	0.726667	0.773333	-2.12459	Down	2.02e-08	3.1e-07	1.45273	Up	0.000469952	0.00564528	-0.226169	--	0.677795	0.83349	-0.136372	--	0.751279	0.902239	Similar to Cyclin A-like protein (Fragment).
Os05g0573900	2.93333	0.673333	2.05	0.33	0.87	-2.12315	Down	6.36e-06	5.53e-05	1.60623	Up	0.00133072	0.0129573	-1.02885	--	0.331423	0.566731	0.369695	--	0.729753	0.892085	Similar to predicted protein.
Os03g0209800	0.58	0.133333	0.403333	0.11	0.08	-2.12102	Down	0.000286709	0.00159745	1.59694	Up	0.00259898	0.0219227	-0.277534	--	0.655473	0.8204	-0.736966	--	0.562567	0.799613	RhoGAP domain containing protein.
Os01g0611000	86.02	19.7767	74.3567	1.43333	5.54333	-2.12087	Down	0.0133997	0.0417652	1.91066	Up	0.000535421	0.00627913	-3.78635	--	1	1	-1.83497	--	1	1	Protein of unknown function DUF642 domain containing protein.
Os03g0205700	11.1133	2.55667	7.7	1.31	1.41	-2.11996	Down	1.12e-06	1.17e-05	1.59059	Up	4.86e-09	2.88e-07	-0.964697	--	1	1	-0.858569	--	0.191869	0.455737	BTB domain containing protein.
Os09g0466100	9.95333	2.29	5.99	0.533333	1.36333	-2.11983	Down	3.13e-09	5.59e-08	1.38721	Up	0.000636859	0.00719663	-2.10224	--	0.0205041	0.0890205	-0.748209	--	0.318319	0.607413	Cyclin A/B/D/E domain containing protein.
Os06g0566500	6.75	1.55333	3.83333	0.923333	0.953333	-2.11952	Down	3.09e-06	2.93e-05	1.30323	Up	0.00716466	0.0474127	-0.750444	--	0.167366	0.374424	-0.704315	--	0.224246	0.500999	Hypothetical conserved gene.
Os07g0410700	7.74333	1.78333	3.84333	0.343333	0.733333	-2.11838	Down	5.81e-11	1.42e-09	1.10778	Up	0.00353533	0.0278562	-2.37689	--	1.01e-06	2.48e-05	-1.28204	--	0.0129005	0.0726426	Similar to Ethylene-responsive element binding protein 1.
Os09g0421200	1.46	0.336667	1.26333	0.196667	0.613333	-2.11658	Down	0.00142867	0.00637654	1.90784	Up	0.000242218	0.00331905	-0.775568	--	0.535061	0.739374	0.86535	--	0.226384	0.50395	Conserved hypothetical protein.
Os04g0687200	4.46667	1.03	2.64667	1.51667	1.29667	-2.11655	Down	5.73e-06	5.05e-05	1.36153	Up	0.00177482	0.0162754	0.55826	--	0.265371	0.499045	0.332163	--	0.630023	0.841552	Similar to H0701F11.5 protein.
Os12g0107700	3.54	0.816667	2.92333	0.583333	0.483333	-2.11593	Down	7.73e-07	8.47e-06	1.8398	Up	9.07e-07	2.94e-05	-0.485427	--	1	1	-0.756729	--	0.335859	0.6252	Similar to Leucine Rich Repeat family protein expressed.
Os09g0261900	1.37	0.316667	1.2	0.3	0.113333	-2.11314	Down	0.000194715	0.00113829	1.922	Up	1.06e-06	3.38e-05	-0.0780025	--	0.921319	0.964712	-1.48239	--	0.0129801	0.0729818	Similar to cDNA clone:J023055B18 full insert sequence.
Os05g0332300	10.7533	2.48667	5.63	0.556667	0.49	-2.1125	Down	2.13e-07	2.66e-06	1.17892	Up	0.00203374	0.0180335	-2.15933	--	0.00752907	0.0420436	-2.34336	--	0.00157535	0.0140991	Similar to CBL-interacting protein kinase 2.
Os02g0433900	2.86667	0.663333	1.83	0.75	0.31	-2.11157	Down	4.49e-06	4.07e-05	1.46404	Up	0.00128066	0.0125621	0.177157	--	0.774441	0.890163	-1.09747	--	0.151828	0.395603	Conserved hypothetical protein.
Os04g0446401	3.78333	0.876667	3.65	1.20667	1.56333	-2.10956	Down	6.56e-08	9.06e-07	2.0578	Up	2.67e-06	7.59e-05	0.460927	--	0.390203	0.622654	0.834525	--	0.0764976	0.256718	Conserved hypothetical protein.
Os04g0457500	15.78	3.66667	7.47667	2.46667	3.94	-2.10556	Down	1.15e-21	9.58e-20	1.02793	Up	0.000224675	0.00312759	-0.571906	--	0.0360613	0.132929	0.103727	--	0.930872	0.976023	Similar to H0523F07.13 protein.
Os03g0368900	234.683	54.63	118.74	86.9767	63.44	-2.10295	Down	3.95e-15	1.75e-13	1.12004	Up	0.00636791	0.0435787	0.670935	--	0.0448762	0.154994	0.215699	--	0.709377	0.882842	Haem peroxidase family protein.
Os09g0452200	12.4033	2.89	10.93	0.7	1.19667	-2.10159	Down	0.000380686	0.00204647	1.91915	Up	0.000139143	0.00209778	-2.04564	--	0.405756	0.635672	-1.27205	--	0.128729	0.358163	Lysin motif-containing protein Pattern recognition receptor Peptidoglycan and chitin perception in innate immunity
Os12g0616000	2.44	0.57	1.83	0.91	0.623333	-2.09785	Down	5.28e-06	4.69e-05	1.68281	Up	6.9e-05	0.00118267	0.674905	--	0.201804	0.422578	0.129042	--	0.922151	0.973912	Similar to Kinesin-like protein KIFC3.
Os02g0617100	1.59667	0.373333	1.89333	0.213333	0.193333	-2.09653	Down	0.0165804	0.0496004	2.34239	Up	0.000778305	0.00844255	-0.807355	--	0.542248	0.744003	-0.949374	--	0.45842	0.728546	Conserved hypothetical protein.
Os01g0931200	10.1467	2.37333	7.68333	1.18	2.2	-2.09602	Down	4.79e-08	6.82e-07	1.69482	Up	9.12e-05	0.00148622	-1.00813	--	0.33035	0.56557	-0.109411	--	0.853744	0.947798	Armadillo-type fold domain containing protein.
Os05g0406800	6.05	1.41667	4.85333	0.566667	0.713333	-2.09443	Down	8.7e-08	1.17e-06	1.77648	Up	1.09e-05	0.000251574	-1.32193	--	0.0911475	0.252574	-0.989852	--	0.250481	0.532022	Leucine-rich repeat N-terminal domain containing protein.
Os07g0663600	1.63667	0.383333	2.19333	0.106667	0.283333	-2.09409	Down	0.000562489	0.00286609	2.51645	Up	2.55e-05	0.000514082	-1.84549	--	0.148396	0.346319	-0.436099	--	0.519615	0.772541	Short-chain dehydrogenase/reductase SDR domain containing protein.
Os09g0441900	0.723333	0.17	0.693333	0.103333	0.0366667	-2.08913	Down	0.00354134	0.0137907	2.02801	Up	0.00489563	0.0356064	-0.718229	--	0.599779	0.781753	-2.21299	--	0.107253	0.318541	Unknown phosphatidylethanolamine-binding protein (PEBP) like domain protein 426-amino-acid protein homologous to the keratin-associated protein (KAP) 5-4 family Panicle architecture Panicle erectness
Os06g0643500	48.86	11.4867	54.6233	6.54	10.8	-2.08869	Down	0.000105841	0.000664063	2.24956	Up	3.13e-05	0.000607393	-0.812598	--	0.605915	0.785643	-0.0889289	--	0.904188	0.966296	Similar to ADR11 protein (Fragment).
Os08g0553200	0.793333	0.186667	0.84	0.303333	0.273333	-2.08746	Down	0.0014	0.0062678	2.16993	Up	0.000266157	0.00358115	0.70044	--	0.425539	0.65324	0.550197	--	0.569144	0.803041	Protein of unknown function DUF241 plant family protein.
Os01g0896300	3.31333	0.783333	2.17333	0.573333	0.55	-2.08059	Down	7.38e-09	1.23e-07	1.47221	Up	1.3e-05	0.000292208	-0.450252	--	0.528308	0.73496	-0.510195	--	0.34269	0.632225	Hypothetical conserved gene.
Os03g0174200	4.77667	1.13333	5.01667	0.753333	0.77	-2.07543	Down	5.62e-06	4.95e-05	2.14616	Up	2.69e-07	1.02e-05	-0.589212	--	1	1	-0.557642	--	0.546711	0.790421	Conserved hypothetical protein.
Os03g0221500	14.2967	3.40667	11.2767	2.42333	2.7	-2.06925	Down	4.05e-07	4.75e-06	1.72691	Up	2.69e-06	7.62e-05	-0.491368	--	0.404437	0.634758	-0.335401	--	0.492064	0.753312	Glycoside hydrolase family 17 protein.
Os02g0613900	2.18	0.52	3.21333	0.683333	0.896667	-2.06774	Down	5.62e-05	0.000379935	2.62749	Up	1.09e-08	5.92e-07	0.394078	--	0.830826	0.919864	0.78606	--	0.626894	0.840019	Similar to Adenine phosphoribosyltransferase 2 (EC 2.4.2.7) (APRT).
Os01g0233100	2.29	0.546667	1.69667	0.426667	0.436667	-2.06661	Down	0.000160268	0.000957052	1.63397	Up	0.0012285	0.0121488	-0.357552	--	0.657755	0.822103	-0.324129	--	0.655537	0.856883	Similar to Cyclin-A1-2.
Os03g0767600	11.2767	2.69667	7.70667	1.57	1.61667	-2.06409	Down	8.71e-09	1.42e-07	1.51493	Up	0.000153215	0.00226747	-0.780413	--	0.0969783	0.262477	-0.738155	--	0.178167	0.435552	BTB domain containing protein.
Os12g0272800	1.76	0.423333	0.983333	0.323333	0.463333	-2.05571	Down	7.78e-07	8.53e-06	1.21589	Up	0.00208736	0.0184048	-0.388772	--	0.40289	0.63335	0.130256	--	0.886862	0.960317	Typical coiled-coil nucleotide binding leucine rich repeat (CC-NB-LRR) type protein Defense response
Os12g0551200	4.00333	0.963333	2.00667	0.506667	0.976667	-2.05509	Down	1.56e-10	3.56e-09	1.05869	Up	0.00105096	0.01075	-0.926998	--	1	1	0.0198312	--	0.983463	0.993948	Armadillo-like helical domain containing protein.
Os01g0842500	23.0133	5.54333	17.17	4.61333	8.41333	-2.05364	Down	2.7e-17	1.49e-15	1.63106	Up	1.24e-07	5.1e-06	-0.264944	--	0.530164	0.736149	0.601924	--	0.0318672	0.140881	Similar to Laccase (EC 1.10.3.2).
Os04g0231200	3.94333	0.95	2.87	1.74	1.65667	-2.05342	Down	2.28e-06	2.23e-05	1.59505	Up	0.000932331	0.00981651	0.873088	--	0.106804	0.279506	0.802284	--	0.153046	0.397611	Hypothetical gene.
Os03g0115000	23.21	5.59667	21.2867	2.01333	4.06667	-2.05211	Down	7.96e-07	8.7e-06	1.92731	Up	9.74e-05	0.00156466	-1.47498	--	0.0250592	0.102548	-0.460721	--	0.464123	0.732324	Cupredoxin domain containing protein.
Os04g0642000	37.8533	9.13333	21.85	6.3	9.65333	-2.05121	Down	1.73e-09	3.27e-08	1.25842	Up	8.48e-05	0.00140214	-0.53579	--	0.123817	0.307848	0.0798857	--	0.967965	0.988817	Similar to MDR-like p-glycoprotein.
Os01g0151700	0.98	0.236667	1.54	0.26	0.423333	-2.04993	Down	0.00066255	0.00331254	2.702	Up	1.22e-07	5.02e-06	0.135655	--	0.863419	0.936816	0.838938	--	0.501639	0.759806	Similar to Short-chain dehydrogenase Tic32.
Os02g0699500	18.57	4.49	10.5	1.97	2.80667	-2.04819	Down	1.17e-06	1.22e-05	1.2256	Up	0.00365084	0.0285847	-1.18852	--	0.243569	0.474509	-0.677858	--	0.356972	0.645789	Conserved hypothetical protein.
Os05g0507000	24.07	5.83667	23.1367	1.38667	2.46667	-2.04402	Down	3.52e-05	0.000252304	1.98696	Up	0.000239091	0.00328375	-2.07352	--	0.068719	0.208617	-1.24258	--	0.146477	0.387863	Similar to JHL23J11.5 protein.
Os03g0727600	1.05667	0.256667	2.61667	0.0666667	0.0933333	-2.04155	Down	3.23e-06	3.05e-05	3.34976	Up	7.55e-22	2.64e-19	-1.94486	--	0.0703512	0.211889	-1.45943	--	0.0750752	0.253516	ACC synthase Ethylene biosynthesis
Os01g0544450	6.44667	1.56667	6.03333	1.20333	2.23667	-2.04086	Down	2.23e-09	4.12e-08	1.94526	Up	6.71e-12	6.85e-10	-0.380662	--	0.455875	0.679116	0.513652	--	0.368736	0.656903	Similar to DNA replication licensing factor mcm4.
Os01g0280200	1.83667	0.446667	1.22333	0.3	0.466667	-2.03982	Down	2.76e-06	2.64e-05	1.45355	Up	0.00137062	0.0132205	-0.574236	--	0.385274	0.618766	0.0631938	--	0.986763	0.995	IQ motif EF-hand binding site domain containing protein.
Os08g0532700	14.1867	3.47	9.40667	1.03667	1.34	-2.03153	Down	3.02e-09	5.4e-08	1.43875	Up	0.000450555	0.0054602	-1.74298	--	0.060751	0.19142	-1.3727	--	1	1	Similar to Peroxidase 55 precursor (EC 1.11.1.7) (Atperox P55) (ATP20a).
Os06g0726800	8.64	2.11333	6.40333	1.31333	0.87	-2.03151	Down	8.35e-09	1.37e-07	1.5993	Up	1.5e-07	6.03e-06	-0.686287	--	0.541987	0.743826	-1.28043	--	0.16243	0.411789	G2/mitotic-specific cyclin 2 (B-like cyclin) (CycOs2).
Os04g0106500	2.05667	0.503333	1.48	0.273333	0.17	-2.03072	Down	8.7e-05	0.000561135	1.55601	Up	0.00428143	0.0321445	-0.880853	--	0.312694	0.548753	-1.56598	--	0.0875889	0.280528	Similar to B0616E02-H0507E05.9 protein.
Os05g0161800	34.49	8.46667	54.8967	14.62	14.6633	-2.02631	Down	1.39e-34	2.84e-32	2.69685	Up	4.21e-43	7.84e-40	0.788077	--	0.0414462	0.146677	0.792347	--	1.51e-06	3.83e-05	RelA/SpoT domain containing protein.
Os01g0176500	6.66333	1.63667	5.69667	0.743333	0.9	-2.02548	Down	3.08e-07	3.72e-06	1.79936	Up	1.03e-08	5.63e-07	-1.13868	--	0.216192	0.440575	-0.862764	--	0.327783	0.617203	Conserved hypothetical protein.
Os12g0555600	8.14667	2.00667	6.57667	0.67	1.11333	-2.02141	Down	1.01e-10	2.36e-09	1.71256	Up	1.37e-06	4.24e-05	-1.58257	--	0.0165946	0.0763269	-0.849915	--	0.0898013	0.285314	Cellulose synthase-like protein Cell wall biosynthesis
Os02g0193600	5.2	1.28333	3.73333	0.486667	0.726667	-2.01862	Down	5.84e-05	0.00039259	1.54057	Up	0.00287879	0.0237515	-1.39889	--	0.542249	0.744003	-0.82053	--	0.391742	0.677086	Mitotic checkpoint serine/threonine protein kinase Bub1 domain containing protein.
Os09g0540400	3	0.743333	3.91	0.376667	0.146667	-2.01288	Down	3.12e-05	0.000227661	2.39509	Up	1.58e-07	6.29e-06	-0.980721	--	0.277257	0.512043	-2.34147	--	0.0326999	0.143491	Similar to Anther-specific proline-rich protein APG.
Os04g0656800	15.5967	3.86667	13.3333	2.01333	2.56667	-2.01208	Down	1.12e-06	1.17e-05	1.78588	Up	3.3e-05	0.000632073	-0.941504	--	0.706061	0.851381	-0.591194	--	0.491847	0.753171	Similar to Peroxidase precursor (EC 1.11.1.7).
Os06g0707733	0.806667	0.2	0.496667	0.176667	0.156667	-2.01197	Down	0.000138139	0.000838225	1.31228	Up	0.00545775	0.0386683	-0.17897	--	0.71027	0.853605	-0.352302	--	0.523474	0.775256	Disease resistance protein domain containing protein.
Os11g0291475	21.0933	5.24	10.9533	2.25667	1.84333	-2.00915	Down	3.92e-08	5.67e-07	1.06373	Up	0.00512842	0.0369474	-1.21537	--	0.00645559	0.0375591	-1.50725	--	0.0124795	0.0709331	Hypothetical protein.
Os05g0516800	15.39	3.82333	14.5267	5.70667	5.57333	-2.00909	Down	4.69e-07	5.4e-06	1.9258	Up	4.48e-06	0.000117983	0.577817	--	0.263348	0.496639	0.543709	--	0.413286	0.693954	Similar to Ras-related protein RIC2.
Os07g0515200	0.75	0.186667	1.15333	0.116667	0.336667	-2.00643	Down	0.000103588	0.000651849	2.62727	Up	7.72e-10	5.69e-08	-0.678072	--	0.341264	0.577252	0.850857	--	0.263951	0.548556	Conserved hypothetical protein.
Os03g0320800	1.88667	0.47	1.39333	0.29	0.29	-2.00511	Down	0.000113681	0.000706589	1.56781	Up	0.00172151	0.0158944	-0.696608	--	0.559796	0.755198	-0.696608	--	0.403841	0.685225	Similar to Leucine Rich Repeat family protein expressed.
Os12g0149000	3.70333	0.923333	3.38	1.31	1.55667	-2.0039	Down	1.44e-10	3.31e-09	1.8721	Up	3.5e-09	2.16e-07	0.504643	--	0.336112	0.57178	0.753537	--	0.0650383	0.230446	Protein of unknown function DUF868 plant domain containing protein.
Os08g0560300	7.98	1.99	5.82667	0.8	0.716667	-2.00362	Down	4.15e-07	4.85e-06	1.5499	Up	0.000341197	0.00437565	-1.3147	--	0.0988834	0.26584	-1.47339	--	0.00617211	0.041689	Protein of unknown function DUF597 family protein.
Os04g0350300	5.40667	1.35	3.19667	0.563333	0.776667	-2.00178	Down	5.08e-09	8.74e-08	1.24361	Up	0.00052755	0.00621619	-1.2609	--	0.106056	0.278269	-0.797592	--	0.185256	0.446492	Similar to SKIP interacting protein 18 (Fragment).
Os09g0560000	4.83	1.20667	2.94667	0.52	0.65	-2.001	Down	1.41e-07	1.83e-06	1.28806	Up	5.6e-06	0.000142627	-1.21444	--	0.185618	0.400252	-0.892516	--	0.240291	0.519639	Armadillo-like helical domain containing protein.
Os04g0223901	1.70333	0.426667	1.12667	0.76	0.676667	-1.99718	Down	1.73e-07	2.21e-06	1.40088	Up	0.00101666	0.010493	0.83289	--	0.24419	0.475052	0.665336	--	0.346124	0.635262	Dimethylaniline monooxygenase N-oxide-forming domain containing protein.
Os03g0729500	10.01	2.51333	8.85667	0.86	3.12333	-1.99377	Down	2.35e-05	0.000176646	1.81716	Up	0.000107522	0.00169575	-1.54719	--	0.383676	0.617386	0.313485	--	0.860354	0.950624	Transcription factor Floral organ development
Os11g0592600	9.21	2.31667	6.35	0.613333	0.416667	-1.99115	Down	3.14e-09	5.59e-08	1.45471	Up	0.000200292	0.00283995	-1.91731	--	0.0071605	0.0406254	-2.47508	--	2.15e-06	5.21e-05	Targeting for Xklp2 family protein.
Os01g0273100	23.9933	6.06333	27.1633	2.11667	3.83	-1.98445	Down	1.35e-06	1.39e-05	2.16348	Up	3.16e-05	0.000610707	-1.51832	--	0.134613	0.324639	-0.662767	--	0.460689	0.730041	Similar to Ubiquitin conjugating protein-like (Ubiquitin-conjugating enzyme) (Ubiquitinating enzyme).
Os01g0685900	8.19333	2.07333	6.04	1.11667	1.41	-1.9825	Down	5.32e-08	7.5e-07	1.5426	Up	1.16e-06	3.66e-05	-0.892753	--	0.377703	0.611521	-0.556257	--	0.444839	0.71911	Similar to 65kD microtubule associated protein.
Os03g0703000	137.99	35.0267	97.6933	6.79667	9.07667	-1.97804	Down	1.45e-07	1.88e-06	1.47981	Up	0.000149505	0.00222695	-2.36555	--	7.3e-05	0.00100393	-1.94822	--	0.0014513	0.0132131	Similar to Beta-glucosidase.
Os01g0779800	0.84	0.213333	1.17333	0.146667	0.256667	-1.97728	Down	0.00597668	0.0214302	2.45943	Up	0.00015766	0.00232056	-0.540568	--	0.725856	0.862598	0.266787	--	0.912989	0.969542	Similar to SR protein related family member.
Os05g0493400	1.37	0.35	1.44667	0.26	0.296667	-1.96875	Down	3.43e-06	3.22e-05	2.04731	Up	2.01e-05	0.000420507	-0.428843	--	0.680295	0.835092	-0.238512	--	0.767226	0.909891	Similar to Cyclin box (Fragment).
Os02g0757100	15.6067	3.99333	17.4933	2.54333	4.58333	-1.9665	Down	3.47e-09	6.13e-08	2.13114	Up	1.78e-08	9.14e-07	-0.650873	--	0.33832	0.574435	0.198804	--	0.843698	0.943745	Similar to Phi-1 protein.
Os06g0112100	125.197	32.0733	147.083	14.6067	18	-1.96475	Down	6.25e-07	6.99e-06	2.19719	Up	2.09e-09	1.38e-07	-1.13475	--	0.0031673	0.0217686	-0.833377	--	0.0350067	0.150981	Nucleoside phosphorylase family 1 domain containing protein.
Os02g0187700	6.88	1.76667	11.66	0.586667	1.25	-1.96138	Down	8.43e-05	0.000545201	2.72247	Up	1.97e-07	7.64e-06	-1.59042	--	0.141906	0.336365	-0.499102	--	0.521391	0.773892	Similar to Myb-related protein B (B-Myb) (Myb-related protein 1) (XMYB1).
Os12g0547500	2.06	0.53	1.81333	0.873333	1.03	-1.95858	Down	1.42e-05	0.000112243	1.77458	Up	1.83e-07	7.16e-06	0.72054	--	0.0988281	0.265748	0.95858	--	0.0155117	0.0835304	Kinesin-14 family member Non-processive minus-end-directed motor protein that transports actin filaments along microtubules Organization of the cytoskeletal architecture Cell elongation and division
Os07g0277200	1.75667	0.453333	2.08667	0.173333	0.363333	-1.9542	Down	0.000147577	0.000886543	2.20256	Up	0.000502837	0.00597703	-1.38702	--	0.274604	0.509374	-0.319279	--	0.700592	0.878174	Conserved hypothetical protein.
Os01g0274500	11.5967	2.99333	15.6233	0.61	4.92	-1.95389	Down	0.00293718	0.0117753	2.38388	Up	0.000473056	0.00567744	-2.29487	--	0.0578532	0.185447	0.716905	--	0.543242	0.788451	Similar to Expansin-A11.
Os12g0478400	1.39333	0.36	1.84	0.58	0.406667	-1.95247	Down	2.86e-05	0.000210234	2.35364	Up	1.84e-10	1.5e-08	0.688056	--	0.295102	0.531026	0.17585	--	0.848021	0.945775	EGF-type aspartate/asparagine hydroxylation site domain containing protein.
Os12g0263100	5.66	1.46333	3.45667	2.47333	2.59667	-1.95154	Down	3.32e-10	7.17e-09	1.24012	Up	0.00103679	0.010627	0.757198	--	0.183442	0.397335	0.827402	--	0.0624651	0.224787	Similar to Zinc finger DHHC domain containing 4.
Os01g0769700	11.86	3.06667	12.3667	1.21	2.62333	-1.95136	Down	3.39e-08	4.96e-07	2.01171	Up	2.33e-09	1.52e-07	-1.34166	--	0.0344721	0.128858	-0.22527	--	0.709156	0.882842	Receptor-like kinase Control of reproductive growth and development Repression of cell death
Os01g0118300	4.31333	1.11667	3.35333	0.573333	0.56	-1.9496	Down	1.25e-06	1.29e-05	1.5864	Up	3.71e-06	0.000100425	-0.961753	--	0.288964	0.525085	-0.9957	--	0.308632	0.597116	Similar to Phosphatidyl serine synthase.
Os01g0805600	16.9933	4.40333	13.4633	1.65667	2.51667	-1.9483	Down	2.08e-09	3.86e-08	1.61237	Up	2.97e-06	8.31e-05	-1.41031	--	1	1	-0.807082	--	0.322816	0.61201	Similar to Cyclin-B1-1.
Os04g0625000	18.43	4.78667	10.2333	1.64	2.54667	-1.94496	Down	3.03e-07	3.67e-06	1.09618	Up	0.00273416	0.0228677	-1.54533	--	0.0379046	0.137518	-0.910411	--	0.151282	0.394841	Conserved hypothetical protein.
Os06g0131700	11.51	2.99	7.71333	3.81	5.66	-1.94467	Down	1.24e-06	1.28e-05	1.36721	Up	0.0012953	0.0126913	0.349646	--	0.399685	0.630906	0.920657	--	0.12725	0.355564	Similar to NAM protein.
Os04g0461600	11.0833	2.88	6.76	0.64	1.20667	-1.94425	Down	5.92e-10	1.22e-08	1.23095	Up	3.9e-05	0.000724878	-2.16993	--	5.81e-05	0.000827112	-1.25504	--	0.00283517	0.0226387	Similar to Fw2.2.
Os05g0478300	3.69333	0.96	2.47333	0.643333	1.04	-1.94382	Down	6.91e-05	0.000455361	1.36535	Up	0.00104641	0.0107109	-0.577468	--	0.292534	0.528278	0.115477	--	0.917844	0.971776	Hypothetical conserved gene.
Os03g0338400	15.09	3.92667	18.8367	0.446667	0.526667	-1.94222	Down	0.000267958	0.00150903	2.26217	Up	5.6e-05	0.000986837	-3.13603	--	0.00375539	0.0247635	-2.89834	--	0.107409	0.318799	Basic helix-loop-helix dimerisation region bHLH domain containing protein.
Os08g0237000	1067.95	279.147	594.393	83.8167	90.9333	-1.93574	Down	2.41e-09	4.4e-08	1.09039	Up	0.00206094	0.0182097	-1.73571	--	4.38e-08	1.5e-06	-1.61814	--	0.000653888	0.00693599	Xyloglucan endotransglycosylase/hydrolase protein 8 precursor (EC 2.4.1.207) (End-xyloglucan transferase)
Os03g0162200	30.0533	7.87	24.26	5.06	7.62667	-1.93309	Down	1.99e-16	1.02e-14	1.62414	Up	3.27e-05	0.000628005	-0.637226	--	0.324368	0.559267	-0.045311	--	0.869907	0.954446	Similar to Histone H2A.
Os03g0587200	7.28333	1.91	6.18	1.07333	1.23667	-1.93103	Down	6.98e-08	9.59e-07	1.69403	Up	3.59e-14	5.04e-12	-0.831474	--	0.212894	0.436334	-0.627116	--	0.338774	0.628471	Kinesin motor region domain containing protein.
Os02g0699466	26.68	7.00667	16.09	3.30333	4.16333	-1.92896	Down	7.34e-07	8.09e-06	1.19936	Up	7.56e-05	0.00127341	-1.08481	--	0.167113	0.374083	-0.750989	--	0.330638	0.620337	Conserved hypothetical protein.
Os06g0678800	22.7067	5.97	24.8533	3.03667	5.37333	-1.92731	Down	0.000966352	0.00458397	2.05764	Up	0.000149065	0.00222261	-0.975242	--	0.122499	0.305867	-0.151914	--	0.78146	0.916941	Similar to Pollen-specific protein NTP303 precursor.
Os12g0267900	3.53667	0.93	2.88	1.07	0.703333	-1.92709	Down	1.49e-08	2.33e-07	1.63077	Up	1.02e-08	5.63e-07	0.202308	--	0.594385	0.778516	-0.403022	--	0.542345	0.788138	Zinc finger RING/FYVE/PHD-type domain containing protein.
Os08g0117700	1.74667	0.46	1.56333	0.14	0.173333	-1.9249	Down	0.000371661	0.00200368	1.76492	Up	0.00186164	0.0168897	-1.71621	--	0.142648	0.337552	-1.40808	--	0.128886	0.358263	Serine/threonine protein kinase domain containing protein.
Os05g0113900	40.1667	10.5833	24.24	7.98667	11.7567	-1.9242	Down	1.84e-14	7.45e-13	1.1956	Up	0.00286287	0.0236726	-0.406129	--	0.261451	0.494738	0.151685	--	0.879091	0.957555	Similar to Histone H2A.
Os06g0256000	3.18333	0.84	1.97667	0.696667	0.773333	-1.92208	Down	4.23e-09	7.35e-08	1.23461	Up	0.00260033	0.021925	-0.269921	--	0.683537	0.837359	-0.119299	--	0.791731	0.921611	Conserved hypothetical protein.
Os01g0899800	3.27	0.863333	2.15667	0.646667	1.40333	-1.9213	Down	6.82e-12	1.93e-10	1.32081	Up	0.000137191	0.00207361	-0.416895	--	1	1	0.700868	--	0.479303	0.743351	Pathogenesis-related transcriptional factor and ERF domain containing protein.
Os03g0770900	4.30333	1.14333	4.05	0.566667	0.88	-1.91221	Down	2.72e-05	0.000200804	1.82468	Up	1.23e-05	0.000278483	-1.01267	--	0.415008	0.643882	-0.377671	--	0.648377	0.853108	Conserved hypothetical protein.
Os03g0301950	1.36667	0.363333	2.28667	0.0466667	0.1	-1.9113	Down	2.47e-05	0.000184206	2.65388	Up	3.81e-08	1.78e-06	-2.96083	--	0.0335851	0.126695	-1.86129	--	0.0182388	0.0939761	Peroxisomal protein
Os02g0219200	11.0267	2.93667	6.93667	1.89	2.63	-1.90875	Down	8.86e-18	5.21e-16	1.24006	Up	3.55e-05	0.000672106	-0.635793	--	0.219251	0.444286	-0.159117	--	0.601807	0.825089	Similar to Beta-galactosidase precursor (EC 3.2.1.23) (Lactase) (Acid beta- galactosidase) (Exo-(1-->4)-beta-D-galactanase).
Os10g0169200	207.803	55.4167	141.11	13.6533	25.4467	-1.90683	Down	4.21e-08	6.05e-07	1.34843	Up	0.00305076	0.0248603	-2.02107	--	0.115859	0.294673	-1.12284	--	0.286404	0.574007	Conserved hypothetical protein.
Os05g0543100	13.8967	3.71	9.11667	2	2.25333	-1.90525	Down	2.91e-08	4.32e-07	1.29709	Up	0.000248753	0.00338677	-0.891419	--	0.098515	0.265222	-0.719358	--	0.160701	0.408501	Similar to Clathrin coat assembly protein AP47 (Clathrin coat associated protein AP47) (Golgi adaptor AP-1 47 kDa protein) (HA1 47 kDa subunit) (Clathrin assembly protein assembly protein complex 1 medium chain) (Uncoordinated protein 101).
Os02g0639600	5.28	1.41	4.32333	0.67	1.21	-1.90484	Down	0.000251326	0.00142627	1.61645	Up	0.000601763	0.00689157	-1.07346	--	0.266322	0.49984	-0.220688	--	0.760096	0.906346	Similar to MLD (Degenerative spermatocyte homolog 1 lipid desaturase) (Migration-inducing gene 15 protein) (Sphingolipid delta 4 desaturase protein DES1).
MSTRG.31447	16.9967	4.54667	18.0567	1.73	4.18	-1.90237	Down	2.27e-07	2.82e-06	1.98965	Up	0.000326321	0.00422826	-1.39404	--	0.457195	0.680166	-0.121306	--	0.856527	0.948759	PREDICTED: early nodulin-like protein 3 [Oryza sativa Japonica Group]
Os12g0610300	2.75	0.736667	1.87	0.603333	0.74	-1.90035	Down	1.77e-05	0.000137158	1.34395	Up	0.00603251	0.0417634	-0.288057	--	0.700987	0.847969	0.00651331	--	0.939931	0.979144	Hypothetical conserved gene.
Os07g0656900	27.6733	7.41333	15.6033	3.21333	3.93667	-1.9003	Down	1.07e-12	3.38e-11	1.07366	Up	0.00144669	0.0138144	-1.20605	--	0.00435047	0.0277365	-0.913148	--	0.0416596	0.170218	Similar to Serine carboxypepsidase (Fragment).
Os03g0736500	20.4233	5.48667	19.97	1.56333	3.73667	-1.89622	Down	5.38e-06	4.77e-05	1.86383	Up	0.000236162	0.00325252	-1.8113	--	0.059203	0.188073	-0.554178	--	0.653726	0.855903	Syntaxin-related protein KNOLLE (Syntaxin 111) (AtSYP111).
Os06g0300000	1.64667	0.443333	2.22333	0.263333	0.346667	-1.89308	Down	0.0122028	0.0386645	2.32626	Up	0.00177074	0.0162432	-0.751502	--	0.405689	0.635669	-0.354843	--	0.756043	0.904549	Short-chain dehydrogenase/reductase SDR domain containing protein.
Os09g0521400	20.4933	5.52	14.0967	4.17333	5.60667	-1.89241	Down	1.06e-06	1.12e-05	1.35261	Up	7.32e-06	0.00017791	-0.403468	--	0.278878	0.513699	0.022475	--	0.92212	0.973912	Similar to HMG-CoA synthase.
Os06g0293500	16.3767	4.42667	10.2	4.74667	5.63	-1.88735	Down	2.84e-08	4.22e-07	1.20428	Up	0.00276218	0.0230512	0.100694	--	0.79156	0.899826	0.346914	--	0.466499	0.734122	Conserved hypothetical protein.
Os01g0309100	14.9833	4.07	19.9033	2.21	2.40333	-1.88026	Down	7.17e-05	0.000470882	2.28991	Up	1e-05	0.000233372	-0.880982	--	0.110534	0.286012	-0.759992	--	0.395913	0.679734	Similar to anther-specific protein SF18.
Os01g0312800	4.33667	1.18	3.28667	0.84	1.57667	-1.8778	Down	4.15e-05	0.000291363	1.47784	Up	9.69e-05	0.00155857	-0.490326	--	0.662217	0.82443	0.418091	--	0.676253	0.866999	Similar to CEL4%3DCELLULASE 4 (Fragment).
Os03g0577100	3.33	0.906667	2.63667	0.593333	0.676667	-1.87688	Down	2.35e-05	0.000176461	1.54007	Up	0.000185217	0.00266169	-0.611729	--	0.307215	0.543254	-0.422127	--	0.546688	0.790421	Nuf2 family protein.
Os04g0649700	4.14667	1.13	2.34667	0.433333	0.326667	-1.87563	Down	2.74e-09	4.95e-08	1.05429	Up	0.00447374	0.0331946	-1.38277	--	0.0720816	0.215091	-1.79043	--	0.016869	0.0887687	Serine/threonine protein kinase-related domain containing protein.
Os06g0691200	10.7967	2.94333	21.8567	1.33	4.48333	-1.87506	Down	0.00491683	0.0182167	2.89255	Up	0.00471161	0.0345719	-1.14602	--	0.172669	0.382455	0.607121	--	0.629859	0.841552	Similar to Thaumatin-like protein precursor.
Os04g0382900	5.06667	1.38333	7.44667	2.52	2.52667	-1.87289	Down	3.98e-07	4.67e-06	2.42845	Up	7.3e-08	3.19e-06	0.865275	--	0.0508621	0.169117	0.869087	--	0.0835483	0.2725	Conserved hypothetical protein.
Os11g0657000	2.02333	0.553333	1.3	0.29	0.23	-1.87051	Down	1.08e-07	1.44e-06	1.23229	Up	0.000233126	0.00322258	-0.932096	--	0.387903	0.621145	-1.26651	--	0.0753525	0.254282	Kelch repeat type 2 domain containing protein.
Os03g0323500	5.67667	1.55333	3.47	0.913333	0.936667	-1.86968	Down	8.56e-09	1.4e-07	1.15957	Up	5.44e-07	1.88e-05	-0.766154	--	0.112271	0.288502	-0.72976	--	0.116978	0.336407	Arf GTPase activating protein family protein.
Os03g0187800	56.02	15.3533	41.2833	8.77	12.2667	-1.86739	Down	5.71e-15	2.49e-13	1.42701	Up	7.34e-09	4.17e-07	-0.807903	--	0.00120879	0.0101415	-0.323809	--	0.19993	0.466411	Protein of unknown function DUF250 domain containing protein.
Os11g0107700	4.64333	1.27667	4.53667	0.583333	0.84	-1.86278	Down	1.82e-05	0.000140441	1.82925	Up	8.03e-09	4.49e-07	-1.12999	--	1	1	-0.603921	--	0.468441	0.735459	Similar to Leucine Rich Repeat family protein expressed.
Os07g0507200	6.07	1.67	4.49	1.04667	0.906667	-1.86185	Down	1.14e-06	1.19e-05	1.42687	Up	7.5e-07	2.48e-05	-0.674046	--	0.301157	0.537059	-0.881204	--	0.208059	0.478791	Cell cycle regulated microtubule associated protein domain containing protein.
Os03g0288900	3.94	1.08667	2.54667	0.596667	0.786667	-1.85829	Down	1.47e-08	2.31e-07	1.2287	Up	0.000554259	0.0064644	-0.864912	--	0.349853	0.585285	-0.466085	--	0.563535	0.800055	Hypothetical protein.
Os03g0138500	7.65	2.11	8.70667	1.25333	1.43333	-1.85822	Down	5.74e-09	9.73e-08	2.04488	Up	1.93e-10	1.56e-08	-0.751473	--	0.3739	0.608006	-0.557869	--	0.239251	0.518601	Conserved hypothetical protein.
Os10g0418000	24.38	6.72667	16.3867	6.76333	7.86667	-1.85773	Down	1.94e-12	5.91e-11	1.28456	Up	0.0034895	0.0275752	0.00784269	--	0.958674	0.982336	0.225861	--	0.748327	0.90104	Similar to Histone H2A.
Os04g0631200	6.23	1.72	5.46667	1.19	1.13333	-1.85682	Down	2.24e-05	0.000169136	1.66825	Up	0.00017031	0.00248221	-0.531447	--	0.809157	0.90918	-0.601836	--	0.492475	0.753571	Similar to cDNA clone:J033024P08 full insert sequence.
Os03g0762900	2.35333	0.65	1.69	0.436667	0.586667	-1.85619	Down	0.000125051	0.000768319	1.37851	Up	0.00180758	0.0165063	-0.573907	--	0.516845	0.726086	-0.147899	--	0.739433	0.896505	Protein of unknown function DUF566 family protein.
Os06g0138900	4.10667	1.13667	4.16	1.11333	1.54	-1.85316	Down	1.42e-05	0.000112639	1.87177	Up	5.35e-05	0.000949948	-0.0299236	--	0.921866	0.964754	0.438121	--	0.543854	0.788772	Conserved hypothetical protein.
Os12g0120000	1.61	0.446667	1.25333	0.346667	0.333333	-1.84979	Down	0.000116425	0.00072168	1.4885	Up	5.66e-05	0.000995695	-0.365649	--	0.726879	0.863259	-0.422233	--	0.490052	0.751489	Protein of unknown function DUF936 plant family protein.
Os09g0330700	0.49	0.136667	0.64	0.0466667	0.02	-1.84212	Down	0.00304644	0.0121311	2.22741	Up	0.000314688	0.00410432	-1.5502	--	0.235806	0.464742	-2.77259	--	0.0297648	0.134455	Ankyrin repeat domain containing protein.
Os07g0600700	25.54	7.14333	25.75	3.22333	5.37	-1.83809	Down	3.87e-11	9.72e-10	1.8499	Up	1.21e-12	1.36e-10	-1.14804	--	0.00252918	0.0182369	-0.411675	--	0.395817	0.679734	X8 domain containing protein.
Os03g0302900	3.8	1.06333	2.46	0.55	0.676667	-1.83741	Down	6.32e-06	5.51e-05	1.21006	Up	0.000208073	0.0029349	-0.95109	--	0.253535	0.485488	-0.652077	--	0.225198	0.502382	Conserved hypothetical protein.
Os05g0150733	1.79333	0.503333	2.38333	0.673333	0.743333	-1.83306	Down	0.0027837	0.0112517	2.24339	Up	9.4e-05	0.00152245	0.419807	--	0.627188	0.800095	0.562495	--	0.608825	0.829277	Similar to pro-resilin.
Os02g0699433	12.14	3.41	7.79667	1.37667	1.64	-1.83192	Down	5.74e-06	5.05e-05	1.19309	Up	1.36e-05	0.000301695	-1.30859	--	0.273142	0.50791	-1.05608	--	0.0403844	0.166448	Hypothetical conserved gene.
Os02g0164000	2.76333	0.776667	2.74	0.606667	0.74	-1.83104	Down	0.0009979	0.00470359	1.81881	Up	1.35e-07	5.51e-06	-0.356392	--	0.56296	0.757514	-0.0697703	--	0.836801	0.940502	Peptidase C48 SUMO/Sentrin/Ubl1 domain containing protein.
Os01g0594300	20.9433	5.89	12.8067	0.953333	1.71667	-1.83015	Down	1.84e-08	2.84e-07	1.12056	Up	0.000439946	0.0053603	-2.62721	--	0.135979	0.326792	-1.77866	--	0.00630174	0.0423569	Similar to leucine-rich repeat family protein / extensin family protein.
Os10g0177400	5.26	1.48	3.62667	1.97	1.26	-1.82947	Down	6.85e-08	9.42e-07	1.29305	Up	3.31e-05	0.000632943	0.412598	--	0.265571	0.499137	-0.232173	--	0.624094	0.838986	TB2/DP1 and HVA22 related protein family protein.
Os01g0229400	5.50667	1.55	5.22333	2.71667	2.68	-1.82891	Down	0.000384156	0.00206304	1.7527	Up	0.0003564	0.00452351	0.809569	--	0.180388	0.393093	0.789965	--	0.239747	0.519267	Similar to Rac-like GTP-binding protein 1.
Os03g0807100	11.8933	3.35667	8.87	1.57667	2.14333	-1.82505	Down	6.54e-07	7.28e-06	1.4019	Up	0.000724613	0.00797637	-1.09015	--	0.0627761	0.195933	-0.647173	--	0.251848	0.533837	Protein of unknown function DUF239 domain containing protein.
Os06g0139150	4.24	1.19667	4.26667	1.13	1.60333	-1.82504	Down	9.76e-06	8.05e-05	1.83409	Up	4.25e-05	0.000781465	-0.0826986	--	0.860211	0.935363	0.422053	--	0.550562	0.793018	Conserved hypothetical protein.
Os05g0396900	10.3867	2.93333	8.33333	3.89333	3.07333	-1.82412	Down	6.15e-11	1.5e-09	1.50635	Up	3.48e-07	1.26e-05	0.408465	--	0.310622	0.546541	0.0672632	--	0.966119	0.98815	Conserved hypothetical protein.
Os04g0472700	2.99333	0.846667	2.63	0.59	0.686667	-1.82189	Down	0.000273967	0.00153826	1.6352	Up	0.00110431	0.0111502	-0.521079	--	0.650053	0.816465	-0.302184	--	0.701024	0.87843	Similar to H0305E08.4 protein.
Os03g0161100	1.99	0.563333	1.59333	0.606667	0.68	-1.82071	Down	0.000348035	0.00188943	1.49999	Up	7.64e-05	0.00128383	0.106915	--	0.892532	0.951622	0.271546	--	0.628218	0.84064	Similar to Viral A-type inclusion protein repeat containing protein expressed.
Os07g0637700	9.40667	2.66333	11.9967	3.74667	4.26333	-1.82045	Down	4.64e-05	0.000321292	2.17133	Up	5.06e-06	0.000131408	0.492375	--	0.341577	0.577499	0.678749	--	0.280931	0.567806	Similar to Disease resistance-responsive family protein.
Os03g0817800	52.22	14.8267	43.9433	5.82667	8.31333	-1.81641	Down	2.49e-05	0.000185326	1.56745	Up	0.000491213	0.00586462	-1.34745	--	0.002191	0.0162341	-0.834695	--	0.11034	0.324328	Protein of unknown function DUF231 domain containing protein.
Os01g0925300	16.6533	4.74667	11.5733	1.93333	2.57333	-1.81082	Down	1.29e-06	1.33e-05	1.28582	Up	0.000387226	0.00485884	-1.29582	--	0.0290059	0.114142	-0.883276	--	0.101226	0.307042	Zinc finger DHHC-type domain containing protein.
Os07g0567250	0.946667	0.27	0.803333	0.346667	0.443333	-1.8099	Down	0.000521657	0.00269109	1.57304	Up	0.000795964	0.00860901	0.36059	--	0.567303	0.760571	0.715432	--	0.201566	0.468814	Hypothetical protein.
Os12g0167700	2.74	0.783333	1.66667	0.213333	0.366667	-1.80648	Down	5.71e-06	5.03e-05	1.08927	Up	0.00726057	0.0479071	-1.87652	--	0.0161547	0.0747947	-1.09516	--	0.157799	0.404428	Similar to SAP domain containing protein expressed.
Os12g0180100	19.48	5.57	14.2867	9.40667	9.81333	-1.80624	Down	4.74e-06	4.27e-05	1.35892	Up	0.00103829	0.0106387	0.756006	--	0.0968295	0.262234	0.817066	--	0.0689343	0.239408	Major facilitator superfamily protein.
Os11g0181400	9.92	2.84	8.66333	2.96	3.57667	-1.80445	Down	8.72e-07	9.41e-06	1.60903	Up	6.78e-07	2.27e-05	0.0597062	--	0.94914	0.976794	0.332725	--	0.525261	0.776168	Similar to barley mlo defense gene homolog4.
Os05g0542900	42.03	12.0667	34.3933	14.5433	13.61	-1.80039	Down	4.4e-12	1.28e-10	1.5111	Up	2.89e-09	1.83e-07	0.269331	--	0.303567	0.539689	0.17364	--	0.658633	0.858365	Pectin lyase fold domain containing protein.
Os01g0140400	6.76	1.94333	4.29667	0.736667	1.11667	-1.79849	Down	6.05e-06	5.29e-05	1.14468	Up	0.0045172	0.0334203	-1.39945	--	0.0162648	0.0752098	-0.799335	--	0.141421	0.379287	Similar to leucine-rich repeat protein-related.
Os02g0653200	157.623	45.4533	98.15	19.3967	18.3133	-1.79402	Down	2.57e-08	3.85e-07	1.1106	Up	0.00148396	0.0140811	-1.22858	--	0.00180111	0.0139528	-1.31149	--	0.00408817	0.0301045	Cupredoxin domain containing protein.
Os04g0228100	10.8033	3.11667	10.0933	1.49333	1.37667	-1.7934	Down	1.59e-09	3.04e-08	1.69533	Up	2.38e-09	1.55e-07	-1.06147	--	0.222575	0.448642	-1.17882	--	0.197153	0.462541	Similar to H0209A05.2 protein.
Os01g0758500	4.79	1.38333	5.23	0.343333	0.203333	-1.79188	Down	2.07e-06	2.04e-05	1.91866	Up	7.97e-08	3.44e-06	-2.01047	--	0.0437899	0.152279	-2.76623	--	0.056683	0.210395	Similar to predicted protein.
Os01g0957100	13.4333	3.88333	8.89667	0.696667	0.956667	-1.79045	Down	2.27e-05	0.000170826	1.19597	Up	0.00514646	0.0370275	-2.47876	--	0.343742	0.579612	-2.02121	--	0.129182	0.358596	Protein kinase core domain containing protein.
Os04g0479900	1.54	0.446667	1.63667	0.263333	0.446667	-1.78566	Down	0.00157616	0.00693308	1.87349	Up	0.00253547	0.0214905	-0.762308	--	0.381553	0.615349	3.20343e-16	--	0.969121	0.9892	Conserved hypothetical protein.
Os12g0159000	80.7267	23.4633	76.9533	16.34	20.2233	-1.78264	Down	1.79e-13	6.36e-12	1.71358	Up	4.11e-09	2.49e-07	-0.522	--	0.0800126	0.231349	-0.214387	--	0.269442	0.554812	Harpin-induced 1 domain containing protein.
Os09g0416900	1.65	0.48	1.56333	0.17	0.55	-1.78136	Down	0.00115026	0.00531869	1.70352	Up	0.00164011	0.0152994	-1.4975	--	0.105247	0.277059	0.196397	--	0.904577	0.966472	Armadillo-like helical domain containing protein.
Os06g0285400	6.10667	1.78	6.11667	0.32	0.513333	-1.77851	Down	0.000285567	0.00159331	1.78087	Up	0.000348649	0.0044517	-2.47573	--	0.000377901	0.00391513	-1.79391	--	0.0543157	0.204498	Similar to Serine/threonine-specific kinase like protein.
Os03g0196500	1.38333	0.403333	1.29667	0.496667	0.6	-1.7781	Down	0.00190251	0.00814875	1.68476	Up	0.00678713	0.0456709	0.300305	--	0.72374	0.861814	0.57299	--	0.524401	0.775688	Cyclin-like F-box domain containing protein.
Os03g0727800	1.80333	0.526667	1.21	0.333333	0.643333	-1.7757	Down	4.4e-06	4e-05	1.20004	Up	0.00304409	0.0248195	-0.659925	--	0.310565	0.546516	0.288676	--	0.775466	0.913814	Cyclin-like F-box domain containing protein.
Os08g0129600	1.62	0.473333	1.04333	0.46	0.376667	-1.77507	Down	1.06e-05	8.68e-05	1.14027	Up	0.00712523	0.0472534	-0.0412227	--	0.913325	0.961278	-0.329568	--	0.637575	0.846373	Conserved hypothetical protein.
Os12g0487500	5.48333	1.60333	3.57	0.526667	0.796667	-1.77398	Down	9.53e-06	7.89e-05	1.15485	Up	0.00171929	0.0158789	-1.60611	--	0.0868705	0.244756	-1.00903	--	0.210124	0.481589	Hypothetical conserved gene.
Os09g0520800	0.843333	0.246667	1.2	0.05	0.256667	-1.77354	Down	0.0038212	0.0147066	2.2824	Up	0.00279143	0.0232274	-2.30256	--	0.132742	0.32164	0.0573332	--	0.980234	0.992872	Glycoside hydrolase family 29 (alpha-L-fucosidase) protein.
Os09g0482780	24.47	7.17333	20.84	3.48667	6.47	-1.7703	Down	6.68e-05	0.000442416	1.53864	Up	0.00166354	0.0154938	-1.0408	--	0.0400162	0.143114	-0.148878	--	0.77085	0.911506	FAS1 domain domain containing protein.
Os06g0247000	3.39667	0.996667	5.86667	1.56333	1.66667	-1.76894	Down	8.04e-06	6.81e-05	2.55736	Up	4.36e-11	3.91e-09	0.649442	--	0.299823	0.535784	0.741783	--	0.245396	0.525919	Similar to Avr9/Cf-9 rapidly elicited protein 231.
Os03g0778400	5.62667	1.65333	6.60667	0.493333	1.20333	-1.7669	Down	0.00270181	0.0109693	1.99854	Up	0.00106382	0.0108629	-1.74474	--	0.126917	0.312623	-0.458341	--	0.605766	0.827649	Similar to predicted protein.
Os11g0180600	1.49667	0.44	1.16667	0.806667	0.816667	-1.76618	Down	0.00022007	0.00126955	1.40682	Up	0.000328914	0.00425629	0.874469	--	0.164128	0.369623	0.892244	--	0.0201215	0.100671	Similar to Type III restriction enzyme res subunit family protein expressed.
Os04g0504200	4.07333	1.2	4.17	0.6	0.706667	-1.76318	Down	0.000983111	0.00464966	1.79701	Up	0.00328155	0.0262653	-1	--	0.441225	0.667087	-0.763933	--	0.541936	0.787694	Conserved hypothetical protein.
Os06g0728800	12.2867	3.63333	9.02	4.01	5.44	-1.75773	Down	9.36e-06	7.77e-05	1.31183	Up	0.000136257	0.00206263	0.142309	--	0.646805	0.814284	0.582313	--	0.326965	0.616164	Similar to predicted protein.
Os06g0695200	2.37	0.703333	2.27667	0.53	0.71	-1.75261	Down	0.0056442	0.0204168	1.69464	Up	0.00130534	0.0127687	-0.408216	--	0.552447	0.750566	0.0136104	--	0.951072	0.983006	Similar to Peroxidase precursor (EC 1.11.1.7).
Os07g0677300	172.673	51.2933	180.997	1.97333	0.216667	-1.7512	Down	0.000148349	0.000890369	1.81912	Up	0.000263214	0.00354797	-4.70006	--	1	1	-7.88715	--	1.97e-34	1.61e-31	Peroxidase.
MSTRG.33487	1.71333	0.51	1.24	0.623333	0.483333	-1.74824	Down	0.00144331	0.00642572	1.28177	Up	0.00714458	0.0472959	0.289507	--	0.688346	0.840591	-0.0774788	--	0.790262	0.920758	Histidine protein methyltransferase 1-like protein [Dichanthelium oligosanthes]
Os05g0555100	4.38667	1.31	3.60667	0.75	0.9	-1.74356	Down	0.000103539	0.000651666	1.4611	Up	0.000350807	0.00446776	-0.804604	--	0.325471	0.560217	-0.54157	--	0.40986	0.690354	Similar to Protein phosphatase 2A B'kappa subunit.
Os12g0409800	3.69	1.10333	3.69333	0.553333	0.996667	-1.74175	Down	2.51e-06	2.43e-05	1.74305	Up	0.000673937	0.00753271	-0.995648	--	0.0679992	0.207279	-0.146686	--	0.747944	0.900849	Conserved hypothetical protein.
Os09g0533200	5.27667	1.58	4.54667	1.11667	0.986667	-1.7397	Down	1.55e-06	1.56e-05	1.52488	Up	0.000102815	0.00163379	-0.500726	--	0.299163	0.535178	-0.67929	--	0.425747	0.704501	Glycoside hydrolase family 17 domain containing protein.
Os05g0528101	2.33667	0.7	2.19333	0.123333	0.563333	-1.73903	Down	0.00305577	0.0121576	1.6477	Up	0.00110531	0.0111565	-2.50479	--	0.0836627	0.238498	-0.313366	--	0.583231	0.812595	Hypothetical gene.
Os01g0904400	3.26	0.98	2.23333	1.01333	0.993333	-1.73402	Down	5.92e-05	0.000397813	1.18834	Up	0.00307887	0.0250373	0.0482552	--	0.97136	0.98805	0.0194962	--	0.930743	0.976007	Similar to Chromosome assembly protein homolog.
Os02g0558600	1.27333	0.383333	1.12667	0.346667	0.133333	-1.73194	Down	0.000521259	0.00268947	1.55539	Up	0.000217059	0.00304389	-0.14505	--	1	1	-1.52356	--	0.2174	0.491302	Conserved hypothetical protein.
Os05g0387700	10.5833	3.18667	6.43333	0.79	1.29667	-1.73167	Down	4.55e-13	1.52e-11	1.01352	Up	0.000703769	0.00779302	-2.01212	--	4.38e-06	8.93e-05	-1.29724	--	8.15e-06	0.00016645	Protein kinase core domain containing protein.
Os03g0760500	4.33333	1.30667	3.93	0.24	0.176667	-1.72959	Down	3.04e-08	4.48e-07	1.58864	Up	9.96e-05	0.00159015	-2.44478	--	2.56e-07	7.3e-06	-2.88679	--	3.13e-09	1.43e-07	Cytochrome P450 family protein.
Os10g0524600	5.41333	1.63333	4.35333	1.25333	1.64	-1.7287	Down	0.000142104	0.000858377	1.4143	Up	0.00154459	0.0145478	-0.382049	--	0.546352	0.746733	0.00587657	--	0.934499	0.977179	Peptidase S8 subtilisin-related domain containing protein.
Os11g0247500	1.17	0.353333	1.33667	0.203333	0.343333	-1.72741	Down	0.00040755	0.00217442	1.91954	Up	9.97e-05	0.00159015	-0.797183	--	0.492472	0.7079	-0.0414199	--	0.928078	0.975178	Conserved hypothetical protein.
Os04g0563700	8.59	2.60333	7.76333	1.68	1.88667	-1.7223	Down	4.46e-06	4.05e-05	1.57632	Up	2.33e-06	6.7e-05	-0.631899	--	0.425132	0.652962	-0.46452	--	0.281591	0.568367	Cyclin.
Os08g0452100	1.51667	0.46	1.53333	0.18	0.346667	-1.7212	Down	0.000571742	0.00290814	1.73697	Up	5.16e-05	0.000921996	-1.35364	--	0.263334	0.496639	-0.408085	--	0.613947	0.832686	Similar to Subtilisin-like serine protease.
Os06g0334300	11.6233	3.53	7.3	2.66	2.95333	-1.71928	Down	5.08e-14	1.94e-12	1.04823	Up	1.84e-05	0.000389859	-0.408242	--	0.262131	0.495449	-0.257324	--	0.407204	0.68798	Similar to Resistance protein candidate (Fragment).
Os08g0525700	1.35	0.41	1.59333	0.256667	0.316667	-1.71926	Down	0.000162879	0.000970109	1.95835	Up	3e-06	8.36e-05	-0.675728	--	0.591806	0.776956	-0.372659	--	0.647393	0.852733	Conserved hypothetical protein.
Os06g0247900	25.2867	7.69333	42.5533	5.83667	8.41	-1.7167	Down	1.69e-11	4.5e-10	2.46759	Up	6.82e-23	2.78e-20	-0.398464	--	0.241945	0.472352	0.128497	--	0.846841	0.945286	Similar to Endo-beta-1 4-glucanase precursor (EC 3.2.1.4).
Os02g0489800	3.01	0.916667	2.00667	0.453333	0.45	-1.71529	Down	3.2e-05	0.000232176	1.13033	Up	0.00327131	0.0262155	-1.01582	--	0.365735	0.599968	-1.02647	--	0.139333	0.376126	Similar to SKIP interacting protein 18 (Fragment).
Os06g0126500	95.7733	29.18	60.59	12.9367	13.2567	-1.71464	Down	1.44e-11	3.88e-10	1.0541	Up	7.76e-05	0.00130038	-1.17351	--	1.66e-05	0.000282745	-1.13826	--	0.000670149	0.00707617	Ubiquitin domain containing protein.
Os12g0410200	4.39	1.34	9.07667	2.47	2.02667	-1.71199	Down	0.000120636	0.000745037	2.75993	Up	1.59e-17	3.61e-15	0.882278	--	0.0358846	0.132509	0.596876	--	0.357728	0.646346	Conserved hypothetical protein.
Os02g0158100	9.93667	3.03333	9.08	1.24667	1.55333	-1.71186	Down	5.61e-06	4.95e-05	1.58179	Up	2.76e-05	0.000547666	-1.28283	--	0.0565094	0.182472	-0.965537	--	0.200667	0.467516	EF hand domain containing protein.
Os05g0394200	5.23667	1.6	3.55667	1.29333	1.52	-1.71058	Down	3.36e-09	5.97e-08	1.15245	Up	0.000655879	0.00735296	-0.306978	--	0.513181	0.723914	-0.0740006	--	0.74885	0.901313	Hypothetical conserved gene.
Os04g0585100	4.25	1.3	4.13333	0.613333	0.936667	-1.70895	Down	0.000769161	0.00376024	1.66879	Up	0.000668675	0.00747986	-1.08377	--	0.22675	0.453885	-0.472904	--	0.510735	0.766166	Zinc finger DHHC-type domain containing protein.
Os07g0496700	1.92667	0.59	2.45	0.596667	0.903333	-1.70732	Down	0.00830348	0.0281166	2.05399	Up	0.00444951	0.0330808	0.0162102	--	0.996499	0.998331	0.614543	--	0.562761	0.799719	Phosphate-induced protein 1 conserved region family protein.
Os04g0649200	1.19667	0.366667	0.913333	0.266667	0.343333	-1.70648	Down	0.000391265	0.00209839	1.31667	Up	0.00185518	0.0168466	-0.459432	--	0.529892	0.735877	-0.0948592	--	0.802628	0.926309	Similar to H0212B02.1 protein.
Os09g0298500	9.44667	2.90333	6.43	1.48333	1.80333	-1.7021	Down	5.62e-07	6.38e-06	1.14711	Up	0.00307023	0.0249916	-0.968867	--	0.224539	0.451116	-0.687044	--	0.23331	0.511516	Zinc finger RING/FYVE/PHD-type domain containing protein.
Os01g0140100	28.8433	8.89667	21.7533	2.81667	2.89	-1.6969	Down	9.29e-05	0.000594674	1.2899	Up	0.00584057	0.0407744	-1.65928	--	0.000952591	0.0083293	-1.6222	--	0.0384473	0.160838	Peptidase A1 domain containing protein.
Os11g0271100	2.56	0.79	1.86	0.653333	0.616667	-1.69622	Down	3.9e-05	0.000276014	1.23538	Up	0.00197258	0.0176649	-0.274033	--	0.550727	0.749662	-0.357362	--	0.468551	0.735474	Similar to Blast and wounding induced mitogen-activated protein kinase.
Os07g0201300	2.24667	0.693333	2.16667	0.486667	0.38	-1.69617	Down	0.000392048	0.00210189	1.64386	Up	0.00133411	0.0129734	-0.510615	--	0.64021	0.809388	-0.86755	--	0.169038	0.421843	UDP-glucuronosyl/UDP-glucosyltransferase domain containing protein.
Os04g0423400	7.41333	2.29	13.2467	0.996667	1.3	-1.69477	Down	0.000781028	0.00380951	2.53221	Up	2.37e-16	4.65e-14	-1.20016	--	0.0413376	0.146381	-0.816836	--	0.0244965	0.116444	Similar to OSIGBa0076I14.3 protein.
Os05g0358200	1.66	0.513333	1.28	0.343333	0.583333	-1.69322	Down	8.53e-06	7.17e-05	1.31818	Up	0.000574684	0.00665311	-0.580286	--	0.410796	0.640532	0.184425	--	0.837846	0.940987	Similar to DNA primase.
Os11g0431700	9.49667	2.94333	6.43667	2.43	3.19667	-1.68997	Down	1.4e-08	2.22e-07	1.12886	Up	0.000262473	0.00353958	-0.276495	--	0.482637	0.700263	0.119117	--	0.786218	0.918869	Similar to Serine carboxypeptidase.
Os05g0415700	2.99667	0.93	2.91333	0.526667	0.386667	-1.68806	Down	6.76e-05	0.000446913	1.64737	Up	3.61e-05	0.000682087	-0.820341	--	0.442013	0.66773	-1.26614	--	0.0949328	0.29528	Glycoside hydrolase family 20 protein.
Os11g0169800	8.06	2.50333	6.95667	0.68	2.03333	-1.68693	Down	0.000141324	0.000854798	1.47455	Up	0.000151774	0.0022515	-1.88024	--	0.00580797	0.034677	-0.300004	--	0.609182	0.829482	Similar to Long-chain-fatty-acid--CoA ligase 4 (EC 6.2.1.3) (Long-chain acyl-CoA synthetase 4) (LACS 4).
Os03g0659800	3.51667	1.09333	2.8	0.963333	1.35667	-1.68548	Down	0.00231127	0.00962468	1.35669	Up	0.00401067	0.0305504	-0.182626	--	0.785916	0.896395	0.311333	--	0.700386	0.878106	Similar to H0525G02.7 protein.
Os03g0606100	2.13333	0.663333	1.5	0.71	0.87	-1.6853	Down	2.38e-06	2.32e-05	1.17716	Up	0.00134072	0.0130121	0.098085	--	0.82384	0.916302	0.391281	--	0.379323	0.666332	Similar to predicted protein.
Os07g0634600	43.9633	13.68	35.2167	10.0033	8.34667	-1.68423	Down	4.29e-10	9e-09	1.36419	Up	6.61e-07	2.22e-05	-0.451587	--	0.12099	0.303582	-0.712796	--	0.0342505	0.148654	Similar to Pectin acetylesterase (Fragment).
Os05g0510800	17.27	5.39333	14.59	3.01333	3.7	-1.67902	Down	1.19e-07	1.56e-06	1.43573	Up	2.36e-05	0.000482132	-0.839817	--	0.058287	0.186216	-0.543652	--	0.172393	0.426661	Similar to Cellulose synthase-like family C1 protein.
Os08g0547500	4.18667	1.31	3.04667	0.963333	0.973333	-1.67624	Down	7.69e-06	6.55e-05	1.21766	Up	0.000200137	0.0028391	-0.44346	--	0.272644	0.507143	-0.428561	--	0.227148	0.50501	Kinesin motor domain domain containing protein.
Os03g0749300	815.493	255.463	611.08	61.1133	51.84	-1.67456	Down	1.73e-13	6.14e-12	1.25825	Up	1.3e-07	5.33e-06	-2.06356	--	1.9e-10	1.05e-08	-2.30098	--	1.3e-09	6.53e-08	Similar to Exoglucanase precursor.
Os09g0547200	5.12333	1.61	4.56667	0.636667	0.673333	-1.67002	Down	1.37e-06	1.4e-05	1.50408	Up	7.13e-07	2.38e-05	-1.33845	--	1	1	-1.25767	--	0.259796	0.543699	Protein of unknown function DUF292 eukaryotic domain containing protein.
Os10g0490100	44.3567	13.9467	33.1	17.2367	12.9	-1.66923	Down	2.86e-07	3.48e-06	1.24691	Up	0.00506198	0.0365517	0.30556	--	0.513608	0.724169	-0.112549	--	0.673515	0.86573	Virulence factor pectin lyase fold family protein.
Os03g0212600	4.87667	1.53333	4.03	0.636667	1.01667	-1.66922	Down	7.73e-05	0.000504391	1.39411	Up	0.00012575	0.00193405	-1.26806	--	0.23352	0.461689	-0.592825	--	0.504905	0.761887	Targeting for Xklp2 family protein.
Os02g0198400	3.21	1.01	2.3	0.58	0.676667	-1.66822	Down	5.43e-05	0.000368429	1.18728	Up	5.63e-06	0.000143176	-0.80023	--	0.147307	0.344752	-0.577838	--	0.162509	0.411849	Similar to predicted protein.
Os03g0861100	12.2433	3.85333	10.0167	1.79667	1.84333	-1.66782	Down	1.76e-07	2.24e-06	1.37822	Up	4.31e-07	1.53e-05	-1.10078	--	0.0126392	0.0624382	-1.06379	--	0.000193295	0.00255463	Conserved hypothetical protein.
Os04g0613200	18.0067	5.69333	14.87	6.84333	10.46	-1.66119	Down	3.65e-08	5.31e-07	1.38506	Up	1.19e-05	0.000271791	0.265426	--	0.43603	0.662876	0.877537	--	0.0630948	0.225946	Pectin lyase fold/virulence factor domain containing protein.
Os05g0532500	0.81	0.256667	0.803333	0.12	0.303333	-1.65803	Down	0.0163265	0.0489856	1.6461	Up	0.00231567	0.0200149	-1.09686	--	0.236921	0.466251	0.241008	--	0.894977	0.963338	Hypothetical conserved gene.
Os09g0517600	2.86	0.906667	1.96667	0.606667	0.33	-1.65737	Down	4.51e-06	4.08e-05	1.11711	Up	0.0041077	0.0311145	-0.579668	--	0.45183	0.675532	-1.45811	--	0.0287932	0.131248	Class I formin protein Regulation of grain size Control of microtubule and actin filament cytoskeleton systems
Os05g0205100	2.88667	0.916667	2.92667	0.356667	0.783333	-1.65494	Down	0.000518938	0.00268096	1.67479	Up	0.0033231	0.0265278	-1.36182	--	0.0625127	0.195318	-0.226771	--	0.700991	0.87843	NLI interacting factor domain containing protein.
Os07g0476900	2.69667	0.856667	2.32667	1.04	1.57	-1.65437	Down	0.00121204	0.00556193	1.44146	Up	0.000795747	0.00860901	0.279778	--	0.541955	0.743817	0.873959	--	0.073295	0.249289	Thioredoxin domain 2 containing protein.
Os06g0687600	7.95	2.52667	7.38333	1.62	1.19	-1.65372	Down	5.94e-09	1e-07	1.54704	Up	6.06e-06	0.000152573	-0.641242	--	0.243804	0.474611	-1.08627	--	0.120102	0.342467	Protein of unknown function DUF579 plant family protein.
Os02g0588500	24.8567	7.91	22.2767	6.17667	5.58667	-1.65188	Down	1.44e-06	1.47e-05	1.49378	Up	6.02e-06	0.000151826	-0.356849	--	0.451885	0.675532	-0.50169	--	0.15534	0.401257	Hypothetical conserved gene.
Os05g0497200	13.5833	4.33333	14.4767	0.26	0.993333	-1.64829	Down	5.04e-07	5.78e-06	1.74018	Up	4.48e-08	2.07e-06	-4.05889	--	9.71e-14	9.59e-12	-2.12513	--	0.0156157	0.0838657	AP2/ERF (APETALA2/ethylene-responsive factor) protein Regulation of spikelet meristem determinancy and floral organ identity
Os10g0333000	1.37667	0.44	1.22333	0.29	0.266667	-1.6456	Down	3.44e-05	0.000247095	1.47524	Up	9.8e-05	0.00157389	-0.601451	--	0.340547	0.576786	-0.722466	--	0.125249	0.351818	Hypothetical conserved gene.
Os01g0385400	2.82333	0.903333	2.23667	0.816667	1.47333	-1.64407	Down	1.21e-05	9.71e-05	1.30802	Up	0.0011834	0.011777	-0.145511	--	0.804269	0.906563	0.705754	--	0.128165	0.357217	C4-dicarboxylate transporter/malic acid transport protein family protein.
Os08g0421800	4.12333	1.32	3.65333	0.813333	1.17	-1.64327	Down	6.81e-06	5.89e-05	1.46868	Up	5.56e-07	1.91e-05	-0.698619	--	0.292981	0.528664	-0.174029	--	0.590338	0.817855	Similar to Mitogen-activated protein kinase kinase kinase 1 (EC 2.7.1.-) (Arabidospsis NPK1-related protein kinase 1). Splice isoform 1S.
Os03g0661300	150.387	48.2733	128.723	16.8933	17.9367	-1.63938	Down	9.35e-06	7.76e-05	1.41498	Up	6.12e-05	0.00106587	-1.51477	--	7e-05	0.000970106	-1.42831	--	6.73e-05	0.00101775	Beta-tubulin Microtubules formation
Os01g0259400	2.66667	0.856667	2.00667	0.45	0.636667	-1.63823	Down	2.19e-05	0.000165959	1.228	Up	1.33e-05	0.00029765	-0.928809	--	0.163097	0.368034	-0.428196	--	0.311612	0.600018	Armadillo-type fold domain containing protein.
Os06g0697000	4.68667	1.50667	4.84333	0.876667	0.32	-1.6372	Down	0.000650186	0.00325872	1.68464	Up	0.00184586	0.0167773	-0.78126	--	0.347685	0.583468	-2.23522	--	0.00434078	0.0315417	Similar to Xyloglucan endo-transglucosylase/hydrolase 1.
Os07g0498400	19.6567	6.32	14.1667	2.28667	2.20333	-1.63702	Down	3.32e-06	3.13e-05	1.1645	Up	0.00227054	0.0197238	-1.46668	--	0.00370918	0.0245624	-1.52024	--	0.00172994	0.0152354	Leucine-rich repeat typical subtype domain containing protein.
Os04g0464100	0.9	0.29	1.87667	0.193333	0.113333	-1.63387	Down	0.016041	0.0483358	2.69405	Up	2.63e-05	0.000525922	-0.584963	--	0.609396	0.78797	-1.35548	--	0.16939	0.422411	Heavy metal transport/detoxification protein domain containing protein.
Os03g0822400	4.81667	1.55667	3.57333	0.186667	0.26	-1.62958	Down	0.00121349	0.00556702	1.19881	Up	0.0040535	0.030812	-3.05992	--	0.00263838	0.0188511	-2.58188	--	0.000314993	0.00385433	Conserved hypothetical protein.
Os01g0618200	4.33	1.4	3.73	2.09	1.78667	-1.62894	Down	0.000212558	0.00123134	1.41375	Up	0.00183798	0.0167178	0.578076	--	0.261746	0.495072	0.351844	--	0.583968	0.813115	Protein phosphatase 2C family protein.
Os05g0431700	21.7633	7.03667	19.21	11.4567	11.9667	-1.62894	Down	5.05e-07	5.79e-06	1.44889	Up	2.02e-06	5.91e-05	0.703223	--	0.0410199	0.145624	0.766057	--	0.0270804	0.125442	Similar to peptide transporter PTR2-B.
Os05g0397900	5.03	1.62667	3.48	1.23333	1.10667	-1.62864	Down	6.71e-07	7.45e-06	1.09717	Up	0.000247682	0.00337614	-0.399356	--	0.433866	0.661089	-0.555698	--	0.195253	0.460013	Kinesin motor region domain containing protein.
Os04g0455600	14.4567	4.67667	11.2367	3.88333	3.75	-1.62818	Down	3.61e-06	3.36e-05	1.26466	Up	0.000447476	0.00542511	-0.268185	--	0.530675	0.736381	-0.31859	--	0.459182	0.729066	Similar to H0523F07.2 protein.
Os01g0907200	5.15	1.67	9.39667	0.173333	0.303333	-1.62472	Down	0.00916071	0.0305401	2.4923	Up	4.51e-05	0.000821429	-3.26823	--	0.00652886	0.0378818	-2.46087	--	0.0474719	0.187052	Similar to BCL-2 binding anthanogene-1.
Os01g0759900	6.23667	2.02333	4.58667	0.99	1.31	-1.62404	Down	4.69e-05	0.000324412	1.18071	Up	0.00721882	0.0476814	-1.03123	--	0.0876296	0.246211	-0.627167	--	0.302994	0.59162	Similar to Permease 1.
Os07g0658700	2.57667	0.836667	2.26	0.49	0.5	-1.62278	Down	3.53e-10	7.57e-09	1.4336	Up	3.35e-07	1.22e-05	-0.771871	--	0.0248638	0.101947	-0.742725	--	0.030597	0.137136	Phosphatidylinositol-4-phosphate 5-kinase family protein.
Os05g0462700	20.93	6.79667	15.66	6.45	9.08333	-1.62267	Down	1.88e-10	4.25e-09	1.20418	Up	0.0075557	0.049251	-0.0755282	--	0.815118	0.912106	0.418394	--	0.471335	0.73774	Similar to Histone H4.
Os02g0767800	0.78	0.253333	1.37667	0.263333	0.386667	-1.62244	Down	0.00707989	0.0246554	2.44207	Up	6.32e-06	0.000157262	0.0558532	--	0.995406	0.997734	0.610053	--	0.540805	0.787043	Similar to DNA binding protein.
Os12g0605500	12.58	4.08667	10.5	2.79333	2.99333	-1.62214	Down	3.7e-08	5.38e-07	1.36139	Up	9.31e-08	3.96e-06	-0.548937	--	0.302343	0.538489	-0.449172	--	0.292778	0.580888	Tesmin/TSO1-like CXC domain containing protein.
Os09g0508500	12.7667	4.15	8.36333	5.45667	4.83667	-1.6212	Down	4.18e-07	4.88e-06	1.01097	Up	0.00343892	0.0272333	0.394909	--	0.224927	0.451619	0.220902	--	0.648295	0.853108	Similar to Isoform 2 of Double-stranded RNA-binding protein 5.
Os03g0852400	15.21	4.96	13.9667	4.73	7.77	-1.61661	Down	0.00049871	0.00259196	1.49358	Up	0.00313465	0.0253841	-0.0684999	--	0.869615	0.940378	0.647574	--	0.382663	0.66879	Conserved hypothetical protein.
Os05g0159300	23.8833	7.79333	19.4933	6.35333	8.22	-1.61569	Down	2.8e-07	3.42e-06	1.32267	Up	5.19e-05	0.000925069	-0.294727	--	0.408292	0.638218	0.0768979	--	0.960608	0.986227	Similar to Alpha-L-fucosidase 2.
Os01g0678400	0.806667	0.263333	0.943333	0.04	0.203333	-1.61508	Down	0.00660549	0.0232953	1.84088	Up	0.00203648	0.0180482	-2.71882	--	0.022054	0.093744	-0.373043	--	0.611138	0.830658	Protein of unknown function DUF2921 domain containing protein.
Os09g0248900	9.10667	2.97333	7.15	1.04	0.726667	-1.61484	Down	2.15e-13	7.52e-12	1.26586	Up	6.76e-06	0.000166541	-1.5155	--	1.76e-05	0.000297601	-2.03272	--	2.46e-10	1.4e-08	Myb/SANT-like domain domain containing protein.
Os02g0700100	37.9633	12.4133	28.7333	11.1533	11.19	-1.61272	Down	3.79e-05	0.000269495	1.21083	Up	2.66e-08	1.31e-06	-0.154416	--	0.684548	0.83804	-0.149681	--	0.484112	0.747047	Similar to WD-repeat protein.
Os03g0721300	17.3267	5.67	13.3933	5.50667	4.41333	-1.61157	Down	1.27e-13	4.58e-12	1.24009	Up	3.98e-05	0.000736613	-0.0421695	--	0.831447	0.920184	-0.36148	--	0.127013	0.355188	Protein of unknown function DUF946 plant family protein.
Os09g0248100	118.623	38.9067	103.23	9.7	9.11667	-1.6083	Down	7.42e-08	1.01e-06	1.40777	Up	9.82e-05	0.00157497	-2.00396	--	1.06e-09	5.15e-08	-2.09344	--	2.27e-07	7.07e-06	FAS1 domain domain containing protein.
Os05g0319700	4.65333	1.53	4.88667	0.07	0.27	-1.60473	Down	0.0115028	0.0368676	1.67532	Up	0.0055926	0.0394236	-4.45003	--	0.000621274	0.00585937	-2.5025	--	0.308235	0.596626	Similar to Protein kinase-like protein (Fragment).
Os12g0459100	4.28333	1.41333	4.96	0.973333	0.606667	-1.59963	Down	0.00020329	0.00118193	1.81124	Up	3.28e-08	1.57e-06	-0.538096	--	0.323616	0.558591	-1.22013	--	0.022709	0.110167	Similar to Transferase family protein.
MSTRG.2710	3.73333	1.23333	5.12333	0.39	0.486667	-1.5979	Down	0.000124671	0.000766253	2.05452	Up	6.27e-07	2.11e-05	-1.66102	--	0.0688256	0.208747	-1.34156	--	0.0279018	0.128287	PREDICTED: cytochrome b561 domain-containing protein At2g30890 [Oryza sativa Japonica Group]
Os11g0120200	1.56	0.516667	1.33333	0.286667	0.453333	-1.59424	Down	0.000285862	0.0015944	1.36773	Up	0.000468112	0.00562945	-0.84986	--	0.500574	0.714185	-0.188662	--	0.857711	0.949243	Protein of unknown function DUF936 plant family protein.
Os05g0427900	1.76667	0.586667	2.72667	0.113333	0.08	-1.59042	Down	0.012181	0.0386224	2.21653	Up	2.55e-06	7.28e-05	-2.37197	--	0.0296409	0.115727	-2.87447	--	0.00326146	0.0252351	Similar to DnaJ-like protein.
Os10g0577400	4.77667	1.58667	4.97	0.833333	1.26667	-1.59001	Down	1e-06	1.06e-05	1.64725	Up	1.37e-05	0.000303131	-0.929033	--	0.300757	0.536672	-0.324962	--	0.633773	0.843637	Conserved hypothetical protein.
Os01g0166800	6.25	2.07667	6.26333	2.12	1.93667	-1.58959	Down	5.41e-10	1.12e-08	1.59266	Up	1.17e-12	1.33e-10	0.0297946	--	0.957308	0.981561	-0.100694	--	0.633178	0.8432	Similar to ETG1 (E2F TARGET GENE 1).
Os02g0699700	18.0367	6.01333	12.8167	4.60667	4.70333	-1.5847	Down	3.06e-05	0.000223692	1.09178	Up	2.81e-05	0.00055619	-0.384442	--	0.474473	0.693444	-0.354481	--	0.348555	0.637708	Similar to DNA topoisomerase II.
Os03g0857500	12.4533	4.15667	10.8233	2.09	1.75333	-1.58303	Down	7.18e-07	7.94e-06	1.38065	Up	0.000152774	0.00226319	-0.991924	--	0.129531	0.316597	-1.24533	--	0.00886985	0.0551348	Protein of unknown function DUF303 acetylesterase putative domain containing protein.
Os06g0291600	5.08667	1.7	3.47333	1.01	1.05333	-1.58119	Down	9.54e-13	3.05e-11	1.03079	Up	0.000112999	0.00177097	-0.751179	--	0.112425	0.288772	-0.690573	--	0.0699006	0.24158	Similar to Protein kinase G11A (EC 2.7.1.-) (Fragment).
Os11g0696200	52.86	17.7033	35.8133	18.8533	19.2967	-1.57816	Down	1.26e-10	2.93e-09	1.01648	Up	0.000458246	0.0055309	0.0907986	--	0.779555	0.893319	0.124331	--	0.816608	0.932248	ATP citrate lyase beta (Fragment).
Os05g0458300	9.44333	3.16667	13.0567	2.48	3.64	-1.57633	Down	9.92e-07	1.05e-05	2.04375	Up	5.15e-06	0.000133144	-0.352625	--	0.52891	0.735276	0.200973	--	0.749698	0.901897	Similar to L-ascorbate oxidase.
Os12g0139300	5.61667	1.89	4.20333	1.41333	1.75333	-1.57133	Down	2.87e-06	2.74e-05	1.15315	Up	9.34e-05	0.00151585	-0.419284	--	0.21492	0.439077	-0.108286	--	0.688292	0.872781	Similar to Cytochrome P450 90A1 (EC 1.14.-.-).
Os01g0265100	60.8833	20.5267	56.0667	22.4467	26.15	-1.56855	Down	2.85e-08	4.24e-07	1.44964	Up	3.6e-07	1.3e-05	0.129002	--	0.76477	0.885211	0.349312	--	0.398574	0.681493	Similar to ADP-ribosylation factor.
Os02g0135300	2.30333	0.776667	1.83	1.37667	1.20333	-1.56836	Down	3.75e-05	0.000267198	1.23648	Up	0.00441014	0.0328949	0.825812	--	0.0647988	0.20006	0.631669	--	0.159718	0.407204	Similar to Wee1-like protein kinase.
Os02g0802200	12.9467	4.36667	11.5367	2.07667	3.26	-1.56798	Down	1.75e-07	2.23e-06	1.40162	Up	6.19e-07	2.09e-05	-1.07226	--	0.00174096	0.0135909	-0.42166	--	0.268706	0.553901	Glycoside hydrolase family 79 N-terminal protein.
Os01g0108800	3.45	1.16667	2.93	0.783333	0.556667	-1.5642	Down	0.000286799	0.00159767	1.32851	Up	0.000536417	0.00628585	-0.574694	--	1	1	-1.06751	--	0.102226	0.309104	Protein of unknown function DUF936 plant family protein.
Os06g0507900	2.90667	0.983333	2.10667	0.606667	0.656667	-1.56361	Down	8.14e-07	8.86e-06	1.09921	Up	0.00179378	0.0164242	-0.696777	--	0.231183	0.459229	-0.582519	--	0.148455	0.390752	Conserved hypothetical protein.
Os08g0459300	17.5267	5.93667	17.95	4.44333	6.29	-1.56183	Down	6.66e-05	0.000440758	1.59626	Up	6.91e-05	0.00118396	-0.418011	--	0.320933	0.556015	0.0834069	--	0.960806	0.986237	Conserved hypothetical protein.
Os06g0654300	5.04	1.71667	5.10333	1.62333	1.84	-1.55381	Down	0.0028549	0.0114974	1.57183	Up	3.59e-05	0.000678777	-0.0806507	--	0.862862	0.936687	0.100096	--	0.915387	0.970697	Similar to Histidine kinase (Fragment).
Os06g0593100	55.6467	18.9567	40.4767	28.0667	22.4633	-1.55359	Down	2.97e-16	1.49e-14	1.09439	Up	1.39e-07	5.62e-06	0.566152	--	0.00445732	0.0282539	0.244867	--	0.292208	0.580209	Similar to UDP-galactose/UDP-glucose transporter.
Os06g0663800	11.1733	3.80667	7.65	3.71333	3.01	-1.55346	Down	9.94e-05	0.000629086	1.00693	Up	0.00713832	0.0472738	-0.0358134	--	0.967985	0.986732	-0.338765	--	0.275476	0.561779	Similar to FKBP-type peptidyl-prolyl cis-trans isomerase 3 chloroplast precursor (EC 5.2.1.8) (PPIase) (Rotamase) (AtFKBP13) (FK506 binding protein 1).
Os03g0703100	17.6667	6.03	13.31	2.95667	3.71333	-1.5508	Down	0.000376598	0.0020279	1.14228	Up	0.00454323	0.0335764	-1.02819	--	0.0799793	0.231276	-0.699443	--	0.0956873	0.296602	Similar to Beta-glucosidase.
Os02g0817500	47.5033	16.2867	45.5467	11.8233	13.9667	-1.54434	Down	2.27e-09	4.18e-08	1.48365	Up	9.35e-06	0.000220456	-0.462055	--	0.106728	0.279333	-0.221704	--	0.487447	0.749435	Potassium channel voltage-dependent beta subunit KCNAB-related domain containing protein.
Os02g0511901	3.42333	1.17667	2.59	0.79	1.24667	-1.5407	Down	7.75e-05	0.00050549	1.13825	Up	0.000354362	0.00449957	-0.574781	--	0.249844	0.481285	0.0833701	--	0.92552	0.974926	Similar to DNA polymerase.
Os06g0194400	2.87	0.986667	2.76333	1.15333	0.896667	-1.54042	Down	0.0012723	0.00579019	1.48577	Up	0.000196336	0.00279317	0.225175	--	0.789734	0.898631	-0.137991	--	0.777102	0.914635	Transcriptional factor B3 family protein.
Os06g0128800	11.31	3.91333	17.78	2.53	4.92667	-1.53113	Down	4.91e-05	0.000337652	2.18379	Up	6.23e-15	9.86e-13	-0.629261	--	0.293394	0.529083	0.332214	--	0.609763	0.829699	C2 calcium/lipid-binding domain CaLB domain containing protein.
Os07g0205500	8.27	2.86333	5.95	2.53333	1.99333	-1.53019	Down	5.3e-10	1.1e-08	1.05519	Up	0.000118649	0.00184678	-0.176659	--	0.53804	0.741488	-0.522513	--	0.240826	0.520148	Protein of unknown function DUF239 plant domain containing protein.
Os03g0180800	5.25333	1.82	11.9433	1.10667	1.74667	-1.52929	Down	0.00017032	0.00101103	2.7142	Up	2.34e-14	3.47e-12	-0.717718	--	0.268864	0.502828	-0.0593341	--	0.909186	0.968088	TIFY domain-containing transcriptional regulator Salt and dehydration stress tolerance
Os06g0187500	1.16333	0.403333	1.28333	0.39	0.353333	-1.52822	Down	0.00741352	0.0256245	1.66985	Up	0.00219442	0.0191562	-0.0484985	--	0.932099	0.968602	-0.190943	--	0.690134	0.873376	Hypothetical conserved gene.
Os03g0749401	3.12	1.08333	2.95	0.416667	0.133333	-1.52607	Down	0.000979596	0.00463441	1.44524	Up	0.00270513	0.0226768	-1.37851	--	0.0183371	0.0818114	-3.02237	--	1.14e-06	3.01e-05	Hypothetical protein.
Os09g0107400	4.03	1.41	4.65	0.39	0.746667	-1.51508	Down	0.00363227	0.0140865	1.72154	Up	0.00106485	0.0108654	-1.85415	--	0.0363303	0.133639	-0.917159	--	0.229786	0.508193	Hypothetical conserved gene.
Os08g0163100	2.72333	0.953333	2.37	0.83	0.543333	-1.51432	Down	1.17e-06	1.22e-05	1.31383	Up	0.000113458	0.00177713	-0.199869	--	0.704123	0.850189	-0.811143	--	0.0521353	0.199476	Nuf2 family protein.
Os04g0107300	4.49667	1.57667	4.52667	3.00333	1.92	-1.51198	Down	6.71e-07	7.45e-06	1.52157	Up	4.96e-07	1.72e-05	0.929687	--	0.0101783	0.0528176	0.284229	--	0.473367	0.738923	NAD(P)-binding domain containing protein.
Os02g0703600	11.7533	4.12333	22.0833	6.21667	6.69333	-1.51119	Down	3.95e-05	0.000279138	2.42107	Up	4.47e-11	3.99e-09	0.59233	--	0.182942	0.396544	0.698914	--	0.113688	0.330185	Similar to Abscisic acid 8'-hydroxylase 1.
Os03g0231700	12.1267	4.25667	8.60667	5.68333	5.16	-1.51039	Down	3.67e-07	4.35e-06	1.01573	Up	2.34e-06	6.73e-05	0.417013	--	0.0347966	0.129647	0.277647	--	0.287496	0.574783	Similar to squalene monooxygenase.
Os03g0773000	16.3833	5.76	14.2033	4.50667	4.03333	-1.50809	Down	2.07e-08	3.16e-07	1.30209	Up	9.03e-08	3.85e-06	-0.354008	--	0.229137	0.456831	-0.514096	--	0.0179879	0.0930643	Protein of unknown function DUF1005 family protein.
Os07g0586200	3.53	1.24333	4.61667	0.59	1.07667	-1.50546	Down	0.00106152	0.00496028	1.89264	Up	6.09e-07	2.07e-05	-1.07543	--	0.199051	0.419113	-0.207641	--	1	1	Similar to Esterase precursor (EC 3.1.1.-) (Early nodule-specific protein homolog) (Latex allergen Hev b 13).
Os03g0324600	4.90333	1.73	3.48333	1.72333	2.13	-1.50299	Down	1.84e-07	2.34e-06	1.0097	Up	0.00169383	0.0156875	-0.00557026	--	0.978773	0.990795	0.300081	--	0.440872	0.716144	NB-ARC domain containing protein.
Os06g0284200	17.3333	6.11667	14.2367	2.67667	3.16667	-1.50273	Down	5.54e-06	4.9e-05	1.21879	Up	0.000189347	0.00271187	-1.19231	--	0.00282117	0.0199106	-0.949781	--	0.00713227	0.0466005	Protein of unknown function DUF246 plant family protein.
Os02g0192500	92.5	32.6433	82.6133	8.24333	12.6033	-1.50266	Down	4.58e-05	0.00031765	1.33959	Up	0.000818713	0.00880708	-1.98549	--	1	1	-1.37298	--	0.144822	0.385328	Similar to Cellulose synthase-like protein (Fragment).
Os08g0520000	5.61	1.98333	4.53667	1.73	2.68333	-1.50007	Down	1.03e-07	1.36e-06	1.19371	Up	0.00109444	0.0110881	-0.197155	--	0.609768	0.788303	0.436099	--	0.525741	0.776638	Mitochondrial substrate carrier family protein.
Os10g0113100	6.55667	2.32333	8.02667	2.3	1.57333	-1.49677	Down	0.010892	0.035256	1.7886	Up	0.000259938	0.00350858	-0.0145623	--	0.975785	0.989707	-0.562372	--	0.238183	0.517437	Aldo/keto reductase family protein.
Os08g0106100	13.7333	4.86667	12.9233	3.35333	3.19333	-1.49668	Down	3.06e-09	5.48e-08	1.40897	Up	4.34e-06	0.00011448	-0.537338	--	0.124841	0.309235	-0.607871	--	0.195842	0.460657	Conserved hypothetical protein.
Os10g0563500	2.88667	1.02667	2.75667	0.83	1.46333	-1.49144	Down	0.000276646	0.00155031	1.42496	Up	2.22e-06	6.43e-05	-0.306785	--	0.555235	0.752427	0.511291	--	0.370618	0.658681	Protein kinase core domain containing protein.
Os06g0592950	16.91	6.01667	12.1567	7.55	7.29333	-1.49084	Down	1.24e-05	9.95e-05	1.01471	Up	0.00145267	0.0138592	0.327512	--	0.377279	0.611204	0.277614	--	0.492121	0.753331	Hypothetical gene.
Os09g0538700	1.1	0.393333	1.08667	0.253333	0.466667	-1.48368	Down	0.0134165	0.0418014	1.46609	Up	0.00337376	0.0268458	-0.634716	--	0.36641	0.600611	0.24664	--	0.766062	0.909189	Protein of unknown function DUF632 domain containing protein.
Os01g0680900	38.6667	13.8533	32.4833	16.6267	16.3733	-1.48086	Down	4.49e-19	3e-17	1.22947	Up	0.000300241	0.00394526	0.263266	--	0.271531	0.50597	0.241115	--	0.476592	0.741849	Similar to Dopamine beta-monooxygenase.
Os07g0243200	1.44	0.516667	1.15	0.133333	0.153333	-1.47876	Down	0.00534112	0.0194859	1.15433	Up	0.00520879	0.0373637	-1.9542	--	0.178268	0.390383	-1.75256	--	0.262358	0.546749	Plastidic large subunit of ADP-glucose pyrophosphorylase (AGP) Starch synthesis in rice pollen
Os03g0106400	5.05667	1.82	5.12333	1.09	0.966667	-1.47425	Down	9.08e-07	9.76e-06	1.49314	Up	0.000293777	0.00387401	-0.73961	--	0.214057	0.437649	-0.912848	--	0.232498	0.510857	Similar to Branched-chain-amino-acid aminotransferase 5 chloroplast precursor (EC 2.6.1.42) (Atbcat-5).
Os11g0470600	14.75	5.32	14.7467	7.74	7.30667	-1.47122	Down	3.81e-06	3.53e-05	1.47089	Up	1.96e-05	0.000413026	0.540907	--	0.133273	0.322712	0.457787	--	0.382576	0.668744	Conserved hypothetical protein.
Os03g0372950	13.3867	4.83	11.7967	6.61667	4.41333	-1.4707	Down	2.77e-07	3.39e-06	1.28828	Up	9.69e-06	0.00022655	0.454081	--	0.136658	0.327861	-0.130154	--	0.638775	0.847114	Hypothetical gene.
Os02g0509600	2.49	0.9	1.86667	0.443333	0.7	-1.46815	Down	0.00136324	0.00613334	1.05247	Up	0.00673405	0.0453957	-1.02153	--	0.0620971	0.194412	-0.36257	--	0.568312	0.802681	Conserved hypothetical protein.
Os08g0490600	25.69	9.29333	39.1533	1.5	3.77333	-1.46694	Down	0.00785004	0.0268976	2.07487	Up	0.000600675	0.00688176	-2.63123	--	0.000214491	0.00244138	-1.30036	--	0.106161	0.317096	FAS1 domain domain containing protein.
Os01g0929000	6.21333	2.25	4.65333	1.40333	1.45667	-1.46544	Down	3.88e-05	0.000274898	1.04834	Up	0.00188275	0.0170345	-0.681067	--	0.122725	0.306214	-0.627254	--	0.128374	0.357602	Similar to aminopeptidase.
Os04g0375900	2.94667	1.07	2.34333	0.643333	0.64	-1.46147	Down	0.00164463	0.00718776	1.13095	Up	0.00108339	0.0109993	-0.733972	--	0.428225	0.655822	-0.741467	--	0.221137	0.496895	Kinesin motor region domain containing protein.
Os04g0436000	3.30667	1.20333	3.97	0.66	0.493333	-1.45834	Down	0.00560077	0.0202857	1.7221	Up	0.00159082	0.0149191	-0.866498	--	0.239328	0.469263	-1.2864	--	0.0703388	0.242645	Conserved hypothetical protein.
Os09g0255900	7.57333	2.76	6.03	4.51667	3.50667	-1.45626	Down	1.63e-10	3.71e-09	1.12749	Up	0.00067427	0.0075336	0.71059	--	0.0101773	0.0528176	0.345432	--	0.299054	0.58794	Protein of unknown function DUF247 plant family protein.
Os06g0253600	2.82667	1.03667	3.41667	0.56	0.573333	-1.44715	Down	0.00786802	0.0269476	1.72064	Up	0.00451227	0.0334153	-0.888453	--	0.205542	0.427233	-0.854506	--	0.462914	0.731645	Similar to secretory protein-like.
Os05g0512000	1.51667	0.556667	1.63	0.703333	0.823333	-1.44602	Down	0.000103713	0.000652375	1.54999	Up	1.68e-05	0.000362402	0.337395	--	0.588181	0.774233	0.564663	--	0.225892	0.50341	Zinc finger RING/FYVE/PHD-type domain containing protein.
Os02g0518000	1.19667	0.44	2.38333	0.213333	0.35	-1.44345	Down	0.0158837	0.047968	2.43741	Up	6.74e-06	0.000166381	-1.04439	--	0.283428	0.518646	-0.330149	--	0.61294	0.831905	C2 calcium-dependent membrane targeting domain containing protein.
Os03g0117300	17.7467	6.53	16.2367	5.94	7.15333	-1.44239	Down	3.2e-06	3.03e-05	1.3141	Up	0.000507887	0.00602984	-0.13662	--	0.67437	0.831844	0.131533	--	0.867387	0.953245	Beta-glucanase family protein.
Os01g0962700	22.3233	8.21667	27.8133	3.67	2.75	-1.44193	Down	1.29e-05	0.000103247	1.75915	Up	2.93e-09	1.85e-07	-1.16277	--	0.00984909	0.0515457	-1.57912	--	0.000161015	0.00218049	Similar to Peroxidase 12 precursor (EC 1.11.1.7) (Atperox P12) (PRXR6) (ATP4a).
Os01g0169800	15.6567	5.77667	18.9867	9.83333	8.36333	-1.43847	Down	2.25e-05	0.000169785	1.71668	Up	2.88e-07	1.07e-05	0.767443	--	0.0626479	0.195624	0.533841	--	0.333373	0.622722	Tryptophan aminotransferase Indole-3-acetic acid (IAA) biosynthesis
Os11g0107600	9.26	3.42667	11.02	4.97667	5.58	-1.43421	Down	2.27e-05	0.000170826	1.68525	Up	8.34e-07	2.73e-05	0.538374	--	0.11555	0.294229	0.703459	--	0.188705	0.451097	Similar to prenylated Rab receptor 2.
Os03g0750300	5.46667	2.02333	4.57333	2.02667	2.46667	-1.43393	Down	0.000234503	0.00134336	1.17651	Up	0.00049849	0.00593722	0.00237481	--	0.94271	0.973412	0.285829	--	0.555515	0.795825	Conserved hypothetical protein.
Os02g0199200	1.45667	0.54	1.36667	0.726667	0.72	-1.43164	Down	0.00448355	0.0168498	1.33963	Up	0.00433288	0.0324324	0.428334	--	0.431497	0.658948	0.415037	--	0.491231	0.752571	Disease resistance protein domain containing protein.
Os08g0414200	0.88	0.326667	0.83	0.42	0.55	-1.42968	Down	0.00618608	0.0220622	1.34529	Up	0.00682021	0.045852	0.36257	--	0.553727	0.75136	0.751612	--	0.217168	0.490925	Zinc finger RING/FYVE/PHD-type domain containing protein.
Os06g0327400	3.99667	1.48667	3.76667	0.673333	0.83	-1.42672	Down	0.0130272	0.0407993	1.34121	Up	0.00584002	0.0407744	-1.14269	--	0.126304	0.311765	-0.840898	--	0.143261	0.382624	Conserved hypothetical protein.
Os11g0503900	10.7667	4.00667	12.8567	5.04667	5.23333	-1.4261	Down	3.09e-10	6.7e-09	1.68204	Up	9.99e-07	3.21e-05	0.332928	--	0.388581	0.621573	0.385328	--	0.308575	0.597044	Sulfotransferase family protein.
Os07g0624700	40.2267	14.9933	33.9467	22.3067	19.3067	-1.42383	Down	4.62e-12	1.34e-10	1.17895	Up	2.05e-09	1.36e-07	0.573154	--	0.00125534	0.0104567	0.364778	--	0.0743883	0.251957	UMP/CMP kinase a (EC 2.7.1.48).
Os04g0531100	60.6767	22.7067	46.9467	13.1133	13.26	-1.41803	Down	6.74e-07	7.48e-06	1.04791	Up	0.000439312	0.00535666	-0.792081	--	0.190257	0.406797	-0.776035	--	0.0565608	0.210044	Small C2-domain protein consisting of a single C2 domain Phloem protein Signaling pathway involving Ca<sup>2+</sup> ions Defense response
Os10g0555600	178.23	66.8533	140.52	16.43	22.55	-1.41467	Down	3.03e-05	0.000221837	1.0717	Up	0.00623138	0.0428511	-2.02467	--	1	1	-1.56787	--	0.00546704	0.0379364	Beta-expansin precursor.
Os08g0496600	2.17667	0.816667	2.63667	0.333333	0.643333	-1.4143	Down	0.0137496	0.0426478	1.6909	Up	5.57e-05	0.000982392	-1.29278	--	0.262746	0.49623	-0.344181	--	0.499404	0.758552	Hypothetical conserved gene.
Os05g0438500	14.4833	5.44667	15.93	4.15667	4.92333	-1.41095	Down	0.0026013	0.0106274	1.5483	Up	0.00206748	0.0182512	-0.389947	--	0.48949	0.705371	-0.145738	--	0.765296	0.908816	Similar to Soluble inorganic pyrophosphatase (EC 3.6.1.1) (Pyrophosphate phospho- hydrolase) (PPase).
Os04g0376700	6.51667	2.45333	6.92667	2.8	2.19333	-1.40939	Down	0.00337727	0.0132438	1.49742	Up	0.000391737	0.00490306	0.190684	--	0.823158	0.915924	-0.161618	--	0.670582	0.864021	Similar to ER lumen protein retaining receptor (HDEL receptor) (PGP169-12).
Os01g0236000	3.17667	1.2	2.92667	1.36	1.47	-1.40448	Down	0.000293751	0.00163185	1.28622	Up	0.00290903	0.0239478	0.180572	--	0.711937	0.854469	0.292782	--	0.565917	0.801168	Conserved hypothetical protein.
Os06g0104300	12.8533	4.86	9.92333	2.60667	3.64667	-1.40311	Down	5.78e-05	0.00038955	1.02987	Up	0.00527064	0.0376713	-0.89875	--	0.472451	0.691864	-0.414378	--	0.470365	0.737138	Similar to Pectinesterase-like protein.
Os03g0669100	30.0533	11.3733	29.6733	12.0567	14.81	-1.40187	Down	3.21e-06	3.03e-05	1.38351	Up	8.87e-05	0.00145476	0.084176	--	0.910201	0.959715	0.380916	--	0.534529	0.782616	Similar to predicted protein.
Os01g0645000	22.9533	8.69	25.0033	6.54333	11.1433	-1.40128	Down	9.12e-07	9.79e-06	1.52469	Up	1.83e-07	7.15e-06	-0.40933	--	0.300736	0.536666	0.358753	--	0.43738	0.713836	Similar to TIS11 protein (dTIS11).
Os07g0574800	263.027	99.6633	201.597	90.47	93.7033	-1.40007	Down	7.93e-09	1.31e-07	1.01634	Up	6.14e-05	0.00106712	-0.139623	--	0.475823	0.694555	-0.0889625	--	0.480475	0.744494	Tubulin alpha-1 chain.
Os12g0125500	3.00333	1.14	2.72	0.443333	0.296667	-1.39753	Down	4.4e-05	0.000306253	1.25457	Up	0.00698368	0.0465742	-1.36257	--	0.00415833	0.0267843	-1.94212	--	1.97e-06	4.84e-05	Similar to MatE family protein expressed.
Os02g0226200	3.50333	1.33	6.51333	1.30333	0.433333	-1.3973	Down	0.000389211	0.00208843	2.29197	Up	3.62e-08	1.7e-06	-0.0292201	--	0.927551	0.966407	-1.61788	--	0.000348206	0.00416949	HAD-superfamily subfamily IB hydrolase hypothetical 1 protein.
Os05g0429900	11.7667	4.47667	16.5733	5.46	4.85	-1.39421	Down	4.62e-06	4.17e-05	1.88837	Up	3.78e-09	2.31e-07	0.286476	--	0.48438	0.702061	0.11556	--	0.858392	0.94961	Similar to MybHv5 (Fragment).
Os12g0510900	15.3367	5.85	21.8767	2.04	5.11	-1.39048	Down	0.000194797	0.00113856	1.90288	Up	2.45e-07	9.33e-06	-1.51987	--	0.023053	0.0969678	-0.195113	--	0.662965	0.85995	Similar to LIM domain protein WLIM-1.
Os03g0564600	11.5833	4.42333	10.73	5.50667	6.15667	-1.38884	Down	1.89e-06	1.88e-05	1.27844	Up	8.05e-05	0.00134025	0.316045	--	0.231464	0.459564	0.477015	--	0.239579	0.51905	Protein of unknown function DUF26 domain containing protein.
Os01g0226666	1.16667	0.446667	1.60333	0.143333	0.32	-1.38512	Down	0.00935837	0.0310856	1.8438	Up	0.00320488	0.0258194	-1.63982	--	0.181373	0.394298	-0.481127	--	0.452086	0.724595	Hypothetical protein.
Os02g0678400	40	15.4	33.51	12.5033	10.2333	-1.37707	Down	1.55e-05	0.00012154	1.12166	Up	0.00110837	0.0111798	-0.300618	--	0.340132	0.576382	-0.589654	--	0.0922495	0.290011	NAD(P)-binding domain containing protein.
Os09g0383300	5.89333	2.27	4.79333	1.58333	1.47	-1.37639	Down	0.000551702	0.00281832	1.07834	Up	0.00119828	0.0118933	-0.519727	--	0.318785	0.553926	-0.626876	--	0.15113	0.394567	Hypothetical conserved gene.
Os01g0680950	11.5267	4.45	8.96	4.83333	5.20333	-1.3731	Down	6.39e-07	7.14e-06	1.00969	Up	0.00198749	0.0177422	0.119213	--	0.780889	0.8939	0.225631	--	0.612168	0.831206	Hypothetical gene.
Os04g0337500	4.25	1.64667	6.74667	1.21	1.19	-1.36791	Down	4.19e-06	3.83e-05	2.03463	Up	6.92e-14	9.32e-12	-0.444541	--	0.454687	0.67786	-0.468587	--	0.155915	0.401971	Aldo/keto reductase family protein.
Os01g0716200	10.2667	3.98667	9.59667	0.54	0.406667	-1.36471	Down	0.000861576	0.00415356	1.26735	Up	0.00335819	0.0267434	-2.88415	--	0.000122855	0.00155741	-3.29326	--	1.07e-05	0.000211063	IQ calmodulin-binding region domain containing protein.
Os03g0250200	5.10667	1.98667	4.26667	1.08333	1.10667	-1.36203	Down	2.9e-06	2.77e-05	1.10276	Up	0.000411588	0.00510219	-0.874873	--	0.0617491	0.193632	-0.844129	--	0.0445136	0.178474	TB2/DP1 and HVA22 related protein family protein.
Os05g0563600	210.983	82.33	217.533	60.1733	69.1933	-1.35764	Down	0.00284112	0.0114505	1.40175	Up	0.00294327	0.0241629	-0.452294	--	0.328469	0.56386	-0.250785	--	0.558805	0.797701	FAS1 domain domain containing protein.
Os02g0183000	4.16	1.62333	3.71	1.46333	1.9	-1.35762	Down	0.00293344	0.0117641	1.19246	Up	0.0069622	0.0464842	-0.149701	--	0.823498	0.916135	0.22704	--	0.831954	0.938274	Protein of unknown function DUF597 domain containing protein.
Os04g0540900	4.56667	1.78333	9.04333	1.21	1.42333	-1.35657	Down	1.67e-05	0.000130143	2.34228	Up	7.36e-21	2.33e-18	-0.559569	--	0.187108	0.402433	-0.325303	--	0.431001	0.708189	Receptor-like cytoplasmic kinase Salt tolerance Oxidative stress tolerance
Os05g0440800	9.23667	3.61	7.75667	1.43333	1.51333	-1.35537	Down	0.000259268	0.00146535	1.10344	Up	0.000426875	0.00524799	-1.33262	--	0.00414025	0.0266971	-1.25427	--	0.000868804	0.00873693	Serine/threonine protein kinase domain containing protein.
Os07g0573400	18.3467	7.18	15.9267	2.35333	2.85667	-1.35346	Down	0.00041514	0.0022099	1.14939	Up	0.00224559	0.01956	-1.60928	--	0.00013883	0.00171774	-1.32965	--	0.00887764	0.0551637	Protein of unknown function DUF239 plant domain containing protein.
Os08g0509400	13.52	5.3	12.41	1.22333	0.9	-1.35103	Down	2.71e-05	0.000199894	1.22744	Up	0.000484083	0.00578878	-2.11517	--	0.00635201	0.0371266	-2.558	--	2.69e-10	1.52e-08	Similar to Amygdalin hydrolase isoform AH I precursor (EC 3.2.1.117).
Os06g0256900	2.53667	0.996667	2.23667	0.66	0.546667	-1.34775	Down	9.24e-05	0.000592029	1.16617	Up	0.00445785	0.033118	-0.594645	--	0.496281	0.710906	-0.86645	--	1	1	Similar to Endo-beta-1 4-glucanase precursor (EC 3.2.1.4).
Os12g0169100	5.62	2.21667	4.58333	2.17667	2.20667	-1.34218	Down	3.76e-07	4.44e-06	1.04801	Up	0.000580922	0.00671489	-0.0262713	--	0.90309	0.956721	-0.00652312	--	0.835657	0.939865	Protein of unknown function DUF869 plant family protein.
Os12g0443500	244.12	96.8	232.093	136.433	145.047	-1.33451	Down	2.78e-08	4.13e-07	1.26163	Up	8.57e-07	2.8e-05	0.495117	--	0.0324546	0.123693	0.583438	--	0.0383796	0.160705	Similar to UDP-glucose 6-dehydrogenase (EC 1.1.1.22) (UDP-Glc dehydrogenase) (UDP-GlcDH) (UDPGDH).
Os04g0514800	17.6533	7.00667	14.41	5.75667	5.76333	-1.33314	Down	2.43e-06	2.36e-05	1.04027	Up	0.000514221	0.00608563	-0.283495	--	0.387982	0.621156	-0.281825	--	0.307963	0.596339	Similar to Dual specificity kinase 1.
Os03g0819600	139.587	55.5933	200.403	71.1867	54.3067	-1.32818	Down	0.00219988	0.00923667	1.84992	Up	4.77e-05	0.000861558	0.356695	--	0.389246	0.622061	-0.0337826	--	0.840402	0.942208	Chalcone isomerase (EC 5.5.1.6).
Os02g0646200	12.6067	5.03333	22.2767	5.06333	5.82333	-1.3246	Down	0.000316337	0.00173948	2.14595	Up	2.29e-08	1.14e-06	0.00857332	--	0.975185	0.989492	0.210331	--	0.731002	0.892626	Zinc finger B-box domain containing protein.
Os10g0498900	8.95667	3.59667	9.24333	2.24667	2.66333	-1.3163	Down	0.00032102	0.00176219	1.36175	Up	6.29e-06	0.000157099	-0.678874	--	0.314586	0.55015	-0.433427	--	0.483465	0.746583	Similar to Microtubule-associated protein EB1-like protein.
Os01g0159200	39.55	15.9067	51.9033	7.95667	11.3933	-1.31405	Down	0.0136396	0.0423724	1.7062	Up	0.00168123	0.0155903	-0.999395	--	0.0762594	0.223529	-0.481442	--	0.390534	0.67586	Similar to Fasciclin-like protein FLA18.
Os04g0642100	4.46333	1.79667	4.71667	1.37	1.35	-1.3128	Down	0.00942087	0.0312672	1.39244	Up	0.00251439	0.0213422	-0.391147	--	0.626385	0.799564	-0.412363	--	0.558988	0.797774	Microtubule-associated protein EB1.
Os09g0482900	2.07667	0.836667	1.83667	1.30667	0.94	-1.31154	Down	0.00122838	0.00562399	1.13436	Up	0.00319489	0.0257516	0.643166	--	0.120933	0.303473	0.168008	--	0.785501	0.918663	UDP-glucuronosyl/UDP-glucosyltransferase family protein.
Os08g0380100	8.43	3.40667	9.54	0.65	0.826667	-1.30717	Down	0.00999862	0.032803	1.48563	Up	0.00293038	0.0240836	-2.38985	--	0.0171444	0.0781714	-2.04298	--	0.0231486	0.111833	Similar to Polygalacturonase isoenzyme 1 beta subunit (Fragment).
Os06g0116200	5.99333	2.42333	5.09667	2.25667	2.61	-1.30637	Down	0.000134466	0.000819049	1.07256	Up	0.00327166	0.0262155	-0.1028	--	0.740406	0.871991	0.107057	--	0.869697	0.954446	Transcription factor
Os11g0458100	1.79667	0.726667	1.90333	0.32	0.12	-1.30596	Down	0.00655668	0.0231641	1.38916	Up	0.0049072	0.0356643	-1.18322	--	0.434026	0.661299	-2.59826	--	0.0124365	0.0707555	Conserved hypothetical protein.
Os02g0705300	12.5967	5.09667	10.2833	2.55667	3.70333	-1.30542	Down	7.91e-06	6.72e-05	1.01268	Up	0.00191911	0.0173057	-0.99529	--	0.0211097	0.0908056	-0.46073	--	0.306426	0.594758	Tubby-like protein 2.
Os01g0229000	2.85	1.15333	2.81333	1.04667	1.43667	-1.30515	Down	0.00718385	0.0249413	1.28647	Up	0.000584588	0.00674155	-0.140007	--	0.762237	0.884206	0.316916	--	0.603631	0.826411	Similar to Transcription factor myb.
Os07g0591100	6.58667	2.66667	5.67667	1.59667	2.46	-1.30451	Down	3.22e-05	0.000233916	1.09001	Up	0.00475003	0.0347853	-0.739974	--	0.0441874	0.153407	-0.116379	--	0.769189	0.910924	Protein of unknown function DUF620 family protein.
Os12g0604700	7.14667	2.89667	6.82	1.75	1.67667	-1.30288	Down	0.000259046	0.0014653	1.23538	Up	0.000333898	0.00430097	-0.727039	--	0.228065	0.455553	-0.788798	--	0.0999929	0.304527	Similar to LSTK-1-like kinase.
Os04g0671500	1.43667	0.583333	2.25333	1.07667	0.743333	-1.30033	Down	0.00246464	0.0101679	1.94967	Up	3.85e-05	0.000716111	0.884179	--	0.0642849	0.199017	0.349689	--	0.526156	0.776804	Hypothetical protein.
Os02g0590400	14.4433	5.87333	14.9067	2.24	2.29667	-1.29815	Down	0.00566908	0.0204892	1.34371	Up	8.19e-06	0.000196668	-1.39068	--	1.39e-06	3.27e-05	-1.35464	--	5.67e-06	0.000120902	Lecithin:cholesterol acyltransferase family protein.
Os03g0567100	2.89333	1.17667	4.33	0.84	1.17667	-1.29803	Down	0.0143318	0.044078	1.87966	Up	0.00238735	0.0204985	-0.486244	--	0.652163	0.817998	0	--	0.950289	0.982777	Conserved hypothetical protein.
Os03g0772600	11.4333	4.65667	12.94	6.04333	7.16333	-1.29588	Down	0.000451298	0.00237922	1.47447	Up	0.000112985	0.00177097	0.376047	--	0.358603	0.593002	0.621333	--	0.120991	0.343954	Similar to Lectin-like receptor kinase 7%3B2.
Os06g0683900	6.39	2.61	5.99667	0.616667	1.06	-1.29177	Down	0.000512428	0.00265032	1.20011	Up	0.00382588	0.0295138	-2.08149	--	0.00785712	0.0433819	-1.29999	--	0.0601023	0.218774	Similar to OSIGBa0115M15.5 protein.
Os03g0795300	142.58	58.3333	131.787	69.7167	63.5167	-1.28938	Down	1.16e-07	1.53e-06	1.17581	Up	9.89e-05	0.00158262	0.257183	--	0.276924	0.511751	0.122815	--	0.74055	0.89706	Similar to Extensin protein-like.
Os03g0186900	33.53	13.7233	36.9467	1.79667	0.29	-1.28882	Down	0.00546498	0.0198629	1.42881	Up	0.00238462	0.020486	-2.93324	--	0.284188	0.519617	-5.56443	--	5.67e-06	0.000120902	Radc1.
Os01g0167900	5.76667	2.37333	5.65	2.97	3.25	-1.28082	Down	2.11e-07	2.64e-06	1.25134	Up	1.41e-06	4.35e-05	0.323548	--	0.316847	0.552384	0.453525	--	0.158254	0.405134	KIP1-like domain containing protein.
Os02g0628200	30.53	12.6033	27.8233	3.81333	6.58667	-1.27642	Down	0.000215645	0.00124628	1.14249	Up	0.00167422	0.0155446	-1.72468	--	0.000112015	0.00144617	-0.936185	--	0.0590149	0.215866	Protein of unknown function DUF250 domain containing protein.
Os07g0654700	2.68333	1.11	2.99667	0.743333	1.09667	-1.27347	Down	0.000908599	0.00435136	1.4328	Up	0.000116745	0.00182191	-0.578478	--	0.0857361	0.24251	-0.0174346	--	0.852728	0.947479	Similar to BLE2 protein.
Os12g0621700	4.24333	1.76333	4.01667	1.76333	2.40667	-1.26689	Down	9.47e-05	0.000604155	1.18769	Up	3.52e-05	0.000668092	0	--	0.944336	0.974304	0.448731	--	0.165623	0.416739	Conserved hypothetical protein.
Os04g0506300	2.33667	0.973333	2.21333	0.176667	0.973333	-1.26345	Down	0.000132693	0.000809505	1.18521	Up	0.000313946	0.00409873	-2.4619	--	0.00930267	0.0494781	0	--	0.924619	0.974705	TMS membrane protein/tumour differentially expressed protein family protein.
Os06g0554300	13.23	5.52	11.8233	3.83333	4.32667	-1.26107	Down	9.64e-05	0.000613721	1.0989	Up	4.59e-05	0.000834799	-0.526069	--	0.0694252	0.209967	-0.351412	--	0.320223	0.609366	Conserved hypothetical protein.
Os02g0739900	8.35	3.50333	7.45667	1.89	2.51667	-1.25305	Down	0.000389047	0.0020879	1.0898	Up	0.00487638	0.035475	-0.890342	--	0.0895409	0.249654	-0.477214	--	0.341965	0.631388	Similar to microtubule-associated protein TORTIFOLIA1.
Os06g0347966	2.60333	1.09333	2.99	1.66667	2.17	-1.25163	Down	0.00210687	0.00890231	1.45141	Up	0.000872788	0.00930901	0.608232	--	0.196679	0.415874	0.988962	--	0.0311416	0.13883	Conserved hypothetical protein.
Os01g0580500	1.29	0.543333	2.11333	0.5	0.626667	-1.24746	Down	0.00952883	0.031565	1.95961	Up	4.66e-06	0.000121817	-0.119909	--	0.937391	0.971426	0.205861	--	0.798486	0.92397	ACC oxidase Ethylene biosynthesis
Os05g0444300	10.4133	4.39	9.96333	7.79333	5.68333	-1.24614	Down	1.27e-07	1.67e-06	1.18241	Up	7.19e-06	0.000175712	0.82802	--	0.00107653	0.00922657	0.372516	--	0.188185	0.450318	Protein of unknown function DUF914 eukaryotic family protein.
Os09g0371100	3.11333	1.31333	3.13667	1.32	2.06667	-1.24523	Down	0.00201192	0.0085611	1.256	Up	0.000463143	0.00558105	0.0073048	--	0.974506	0.98928	0.654073	--	0.155911	0.401971	Similar to hydrogen symporter.
Os07g0462200	143.623	60.6367	125.977	45.27	57.43	-1.24403	Down	5.72e-05	0.000385629	1.05489	Up	0.00184535	0.0167773	-0.421635	--	0.19162	0.40882	-0.0783859	--	0.747457	0.900737	Protein of unknown function DUF1218 family protein.
Os11g0270000	27.22	11.51	37.27	1.32333	1.33667	-1.24178	Down	3.3e-05	0.000238244	1.69513	Up	1.04e-05	0.000242076	-3.12064	--	3.48e-12	2.63e-10	-3.10618	--	1.06e-20	2.45e-18	Crotonase core domain containing protein.
Os05g0382900	17.9867	7.61667	16.17	3.53667	3.49	-1.2397	Down	1.71e-05	0.000132983	1.08609	Up	0.000904246	0.00956817	-1.10677	--	0.000740022	0.00676411	-1.12593	--	7.53e-06	0.000155053	Annexin family protein.
Os11g0155500	2.43333	1.03333	2.29667	0.436667	0.66	-1.23563	Down	7.52e-05	0.000492226	1.15224	Up	0.00242853	0.0207614	-1.2427	--	0.0606729	0.191252	-0.646768	--	0.152185	0.396123	Similar to Amino acid permease family protein expressed.
Os04g0524600	17.42	7.43333	16.54	6.34	5.64333	-1.22866	Down	4.04e-07	4.73e-06	1.15388	Up	9.05e-06	0.000214159	-0.229526	--	0.444036	0.66941	-0.397462	--	0.0793282	0.263488	Oligopeptide transporter OPT superfamily protein.
Os10g0579800	8.51333	3.63333	9.09333	2.90333	3.85333	-1.22843	Down	2.11e-06	2.08e-05	1.32352	Up	2.08e-06	6.07e-05	-0.323584	--	0.526847	0.734038	0.0848133	--	0.959266	0.985843	TGF-beta receptor type I/II extracellular region family protein.
Os01g0744000	11.4567	4.89333	10.6933	3.95	3.72333	-1.2273	Down	0.00185936	0.00798855	1.12782	Up	0.000737243	0.00807658	-0.308965	--	0.524613	0.732209	-0.394223	--	0.270348	0.555768	Similar to Kinesin heavy chain (Fragment).
Os09g0451500	56.5833	24.2833	62.9367	41.95	37.7533	-1.22041	Down	6.5e-14	2.44e-12	1.37393	Up	9.65e-16	1.72e-13	0.788704	--	2.45e-05	0.00039496	0.636638	--	0.000155243	0.00210705	Similar to protein disulfide isomerase.
Os11g0618700	12.4367	5.38667	13.93	6.66333	7.96667	-1.20714	Down	0.000231998	0.00133102	1.37073	Up	0.000293483	0.00387184	0.306851	--	0.588506	0.77428	0.564583	--	0.280961	0.567806	Protein of unknown function DUF594 domain containing protein.
Os05g0556400	52.2967	22.6667	51.8733	15.35	21.86	-1.20615	Down	0.00246059	0.0101551	1.19442	Up	0.00399831	0.0304797	-0.562334	--	0.186922	0.40218	-0.0522788	--	0.818466	0.932962	DOMON related domain containing protein.
Os04g0499100	2.96	1.28667	2.77333	0.956667	0.93	-1.20196	Down	7.96e-05	0.000518033	1.10798	Up	0.000320756	0.00417395	-0.42755	--	0.319452	0.554569	-0.468336	--	0.140288	0.377673	Biopterin transport-related protein BT1 family protein.
Os01g0179600	4.25333	1.85	5.41333	0.16	0.0633333	-1.20107	Down	0.000161417	0.000963571	1.54899	Up	0.00432811	0.0324048	-3.53138	--	6.73e-11	4e-09	-4.86842	--	1.9e-17	3.04e-15	UDP-glucuronosyl/UDP-glucosyltransferase family protein.
Os12g0572000	6.74333	2.94667	6.07	1.10667	1.55333	-1.19438	Down	0.000525592	0.00270789	1.04261	Up	0.00583176	0.0407717	-1.41286	--	0.0106033	0.0544372	-0.923716	--	0.11287	0.328694	R2R3-type MYB transcription factor Adaptive growth Salt tolerance
Os02g0192700	8.46667	3.7	8.78	2.72	3.75333	-1.19427	Down	0.000344075	0.00187106	1.2467	Up	0.00113766	0.0114134	-0.443919	--	0.29346	0.529111	0.0206472	--	0.935511	0.977616	Similar to Thioredoxin peroxidase.
Os07g0603300	5.22	2.28667	6.59667	1.93667	2.05333	-1.1908	Down	0.00124372	0.00567957	1.52849	Up	0.000674995	0.00753877	-0.23967	--	0.598778	0.781245	-0.155278	--	0.607164	0.82827	TON1 RECRUIT MOTIF (TRM)-containing protein Regulation of grain size and shape
Os08g0547800	4.15	1.84	4.31	3.00667	2.47333	-1.17341	Down	0.00164422	0.00718696	1.22798	Up	0.000820157	0.00881942	0.708459	--	0.119842	0.301557	0.426751	--	0.415442	0.695709	Alpha/beta hydrolase fold-3 domain containing protein.
Os09g0540600	5.08	2.26333	6.17667	3.57	4.51667	-1.16638	Down	0.000975016	0.00461593	1.44838	Up	5.26e-05	0.000936495	0.657475	--	0.134052	0.323958	0.996809	--	0.0166942	0.088107	Similar to WD-40 repeat protein MSI1.
Os02g0739400	44.9167	20.0533	64.61	13.6233	15.69	-1.16341	Down	7.99e-09	1.32e-07	1.68792	Up	5.95e-18	1.44e-15	-0.557762	--	0.0150145	0.0707799	-0.353997	--	0.115603	0.333947	Similar to Avr9/Cf-9 rapidly elicited protein 231 precursor.
Os05g0362100	3.82333	1.71	5.51667	1.41333	1.70667	-1.16083	Down	0.00474727	0.0176787	1.6898	Up	7.44e-07	2.47e-05	-0.274895	--	0.580778	0.769117	-0.00281502	--	0.874422	0.955927	Similar to Protein MFP-b.
Os02g0730400	5.97667	2.67667	5.4	1.58667	2.38333	-1.1589	Down	0.000759803	0.00372418	1.01252	Up	0.00424248	0.0319565	-0.754438	--	0.0490495	0.165465	-0.167457	--	0.650859	0.854587	Six-bladed beta-propeller TolB-like domain containing protein.
Os08g0275200	4.74667	2.12667	5.05	3.76	3.69	-1.15832	Down	1.87e-07	2.37e-06	1.24769	Up	7.25e-09	4.13e-07	0.822139	--	0.0654365	0.201543	0.795027	--	0.00473269	0.0337878	Protein kinase core domain containing protein.
Os06g0653100	12.74	5.74	12.3533	3.25	4.99	-1.15024	Down	0.00199226	0.00848988	1.10578	Up	0.00522169	0.0374176	-0.820611	--	0.0445863	0.154337	-0.202011	--	0.641377	0.848556	Senescence-associated protein 5.
Os03g0438200	3.11	1.41	3.30333	1.61333	1.82333	-1.14122	Down	0.00708206	0.0246602	1.22823	Up	0.00273482	0.0228677	0.194349	--	0.711606	0.854351	0.370883	--	0.551169	0.793394	Conserved hypothetical protein.
Os04g0474800	264.457	120.083	267.203	116.09	124.93	-1.139	Down	1.34e-07	1.75e-06	1.1539	Up	8.47e-09	4.72e-07	-0.0487922	--	0.80675	0.908211	0.057084	--	0.98843	0.99572	Similar to OSIGBa0135C13.7 protein.
Os02g0605900	30.05	13.7433	35.9567	26.1367	18.0767	-1.12863	Down	5.26e-08	7.42e-07	1.38753	Up	2.49e-05	0.000502305	0.927343	--	0.0159215	0.0739408	0.395397	--	0.403358	0.68521	Similar to Chitinase (EC 3.2.1.14) A.
Os01g0736551	1.06333	0.486667	1.34	0.59	0.456667	-1.12759	Down	0.000647074	0.00324583	1.46123	Up	5.15e-06	0.000133144	0.277781	--	0.426844	0.654638	-0.0917925	--	0.660283	0.858977	Hypothetical gene.
Os05g0516700	14.64	6.72667	17.56	1.10667	1.82333	-1.12195	Down	0.00107937	0.00503213	1.38433	Up	1.69e-05	0.000362673	-2.60367	--	3.39e-09	1.47e-07	-1.88331	--	8.36e-10	4.31e-08	Conserved hypothetical protein.
Os04g0587500	3.7	1.70667	6.41	1.23333	1.10333	-1.11634	Down	0.00286407	0.0115255	1.90914	Up	6.31e-06	0.000157161	-0.468619	--	0.304211	0.540309	-0.629313	--	0.0991052	0.302858	Domain of unknown function DUF250 domain containing protein.
Os09g0524800	26.36	12.1967	27.8167	4.33333	6.05333	-1.11186	Down	0.000491501	0.00255824	1.18946	Up	0.00012633	0.00193998	-1.49294	--	4.88e-06	9.82e-05	-1.01069	--	0.00503641	0.0355444	Apoptosis regulator Bcl-2 protein BAG domain containing protein.
Os08g0154300	21.4933	9.99333	22.93	13.8567	13.2033	-1.10485	Down	0.000234701	0.00134401	1.1982	Up	1.57e-05	0.000342552	0.471542	--	0.0311373	0.120019	0.401864	--	0.166959	0.418909	Aldolase-type TIM barrel domain containing protein.
Os07g0551700	3.01	1.4	3.27333	0.72	0.78	-1.10434	Down	0.0050662	0.0186727	1.22533	Up	0.000398651	0.00497078	-0.959358	--	0.0134074	0.0653012	-0.843881	--	0.0157777	0.0845108	Similar to Cellulose synthase (Fragment).
Os06g0149700	12.0267	5.6	12.14	8.82	7.27	-1.10274	Down	0.00131644	0.00595892	1.11627	Up	0.000640827	0.00723585	0.655352	--	0.104464	0.275777	0.376529	--	0.36893	0.657034	Cysteine synthase (EC 4.2.99.8).
Os02g0302700	15.73	7.32667	17.3	7.27667	4.67333	-1.10229	Down	0.00240445	0.00995819	1.23954	Up	0.000435786	0.00533113	-0.00987926	--	0.959048	0.982489	-0.648705	--	0.0467124	0.184812	Similar to Nicotianamine aminotransferase A.
Os11g0596250	56.0533	26.2133	58.1	47.8667	44.46	-1.0965	Down	7.29e-05	0.000478586	1.14824	Up	0.000444802	0.00540368	0.868721	--	0.00500275	0.0307748	0.762207	--	0.0112679	0.0659713	Conserved hypothetical protein.
Os03g0713100	39.09	18.3667	37.6533	21.0433	20.6633	-1.08971	Down	8.75e-06	7.33e-05	1.03569	Up	1.38e-05	0.000304391	0.196273	--	0.510951	0.722288	0.169983	--	0.621664	0.837504	Similar to dynamin-related protein 1C.
Os05g0134400	387.727	183.71	395.293	58.6933	57.9333	-1.07761	Down	9.26e-06	7.7e-05	1.10549	Up	8.05e-06	0.000193668	-1.64616	--	5.77e-10	2.93e-08	-1.66496	--	3.08e-11	2.07e-09	Haem peroxidase plant/fungal/bacterial family protein.
Os08g0512600	21.89	10.3767	20.8533	5.6	6.91333	-1.07693	Down	1.19e-05	9.56e-05	1.00693	Up	0.00102366	0.0105468	-0.889844	--	0.0549938	0.179051	-0.58589	--	0.225878	0.50341	B-type plant-specific cyclin-dependent kinase DNA damage response
Os01g0705750	3.10333	1.48	3.65	0.253333	0.666667	-1.06822	Down	0.00345036	0.0134758	1.3023	Up	0.00103137	0.0105945	-2.54649	--	0.014554	0.0691571	-1.15056	--	0.0357752	0.153212	Hypothetical protein.
Os06g0217900	2.01	0.963333	2.12333	1.35333	1.25	-1.06109	Down	0.0027371	0.0110921	1.14022	Up	0.000298953	0.00393182	0.49041	--	0.326268	0.561226	0.375821	--	0.409754	0.690302	Similar to Cyclin-D3-1.
Os04g0556100	2.01667	0.966667	2.16667	1.09333	1.01	-1.06088	Down	0.0096959	0.0319852	1.16439	Up	0.00161282	0.0150921	0.177643	--	0.743916	0.874014	0.0632649	--	0.990344	0.996348	Conserved hypothetical protein.
Os03g0758500	35.6567	17.11	37.3033	5.08333	7.06	-1.05933	Down	0.00458266	0.0171577	1.12446	Up	0.00534708	0.0380714	-1.75099	--	0.00162526	0.0128549	-1.2771	--	0.00847609	0.0533159	Cupredoxin domain containing protein.
Os11g0475500	20.46	9.87333	24.4067	16.6367	13.1633	-1.0512	Down	8.47e-07	9.19e-06	1.30567	Up	2.33e-06	6.7e-05	0.752757	--	0.0196244	0.0862339	0.414916	--	0.0844598	0.27414	Conserved hypothetical protein.
Os11g0661900	7.38333	3.56667	7.62	3.00667	2.36	-1.0497	Down	9.73e-05	0.000618674	1.09521	Up	7.02e-05	0.00119944	-0.246411	--	0.433043	0.660595	-0.59579	--	0.0133265	0.0744719	Conserved hypothetical protein.
Os06g0703300	10.0667	4.86667	10.6533	1.65	1.50667	-1.04858	Down	4.53e-05	0.000314554	1.1303	Up	1.27e-05	0.000286802	-1.56047	--	0.00983144	0.0514808	-1.69157	--	0.0044036	0.0319313	Hypothetical conserved gene.
Os07g0246200	416.28	202.793	426.013	325.28	299.783	-1.03754	Down	3.78e-10	8.05e-09	1.07089	Up	6.89e-09	3.95e-07	0.681672	--	0.000317609	0.00340313	0.56391	--	0.00361122	0.0273907	Similar to Calreticulin (Fragment).
Os08g0229601	3.05667	1.50333	3.77333	1.04	2.05333	-1.02379	Down	0.000259253	0.00146535	1.32767	Up	1.38e-08	7.26e-07	-0.531581	--	0.0790179	0.229352	0.449803	--	0.251047	0.532848	Hypothetical conserved gene.
Os12g0137700	9.08333	4.49	11.6733	1.27333	0.796667	-1.01651	Down	0.0141962	0.0437385	1.37843	Up	0.00260293	0.021925	-1.81811	--	0.000362495	0.00377948	-2.49467	--	5.05e-07	1.45e-05	Sulfotransferase family protein.
Os06g0702500	12.98	6.41667	13.57	10.4667	7.92667	-1.01639	Down	0.000212331	0.00123024	1.08052	Up	0.000157147	0.00231529	0.705906	--	0.0126158	0.062333	0.30489	--	0.364405	0.652902	Ribosomal protein S5 domain 2-type fold domain containing protein.
Os01g0750300	84.13	41.64	84.9333	16.9567	27.1133	-1.01465	Down	0.0038389	0.0147517	1.02836	Up	0.00439586	0.032809	-1.29612	--	0.000343738	0.00362632	-0.618968	--	0.103193	0.31129	Similar to Cellulose synthase (Fragment).
Os01g0222500	13.0833	6.50333	13.86	6.54333	6.74	-1.00848	Down	0.00236258	0.00981149	1.09168	Up	0.000413117	0.00511263	0.00884639	--	0.992933	0.996853	0.0515692	--	0.984607	0.994386	Similar to Vacuolar ATP synthase subunit E (EC 3.6.3.14) (V-ATPase E subunit) (Vacuolar proton pump E subunit).
Os06g0176300	0.446667	0.00333333	0.47	0.04	0.123333	-7.06609	Down	3.89e-05	0.000275456	7.13955	Up	1.55e-05	0.00033849	3.58496	--	0.481436	1	5.20945	--	0.182411	0.44214	2OG-Fe(II) oxygenase domain containing protein.
Os06g0177600	0.42	0.00333333	0.44	0.03	0.0833333	-6.97728	Down	5.55e-05	0.000375872	7.04439	Up	1.98e-05	0.000415448	3.16993	--	0.535155	1	4.64386	--	0.281183	0.567953	2OG-Fe(II) oxygenase domain containing protein.
Os05g0153300	10.89	0.133333	3.61	0.0433333	0.3	-6.35182	Down	2.77e-43	8.44e-41	4.75889	Up	1.14e-20	3.48e-18	-1.62149	--	0.349132	0.584822	1.16993	--	0.418914	0.698752	Lipase class 3 domain containing protein.
MSTRG.10231	1.07	0.0133333	0.783333	0.01	0.09	-6.32643	Down	1.11e-12	3.51e-11	5.87652	Up	5.1e-07	1.77e-05	-0.415037	--	0.87762	1	2.75489	--	0.299158	0.58794	NBS-LRR-like resistance protein, partial [Oryza sativa]
Os11g0484700	7.07	0.106667	5.40667	0.24	0.09	-6.05053	Down	1.38e-12	4.28e-11	5.66356	Up	1.63e-05	0.000351835	1.16993	--	0.752073	1	-0.245112	--	0.922185	1	Bifunctional inhibitor/plant lipid transfer protein/seed storage domain containing protein.
Os07g0214900	2.35333	0.04	1.45333	0.0133333	0.26	-5.87856	Down	3.86e-12	1.12e-10	5.18322	Up	9.65e-06	0.000225994	-1.58496	--	0.675909	1	2.70044	--	0.391802	0.677087	Similar to Chalcone synthase C2 (EC 2.3.1.74) (Naringenin-chalcone synthase C2).
Os01g0914100	27.09	0.486667	9.96	0.73	1.30667	-5.79868	Down	4.65e-33	8.9e-31	4.35514	Up	4.01e-12	4.25e-10	0.584963	--	0.789599	0.898631	1.42489	--	0.355507	0.644454	Plant lipid transfer protein/seed storage/trypsin-alpha amylase inhibitor domain containing protein.
Os01g0215700	1.01333	0.0233333	1.36667	0.333333	0.41	-5.44057	Down	1.19e-06	1.24e-05	5.87213	Up	3.03e-09	1.91e-07	3.8365	--	0.10275	0.272796	4.13516	--	0.0176867	0.0919629	Esterase SGNH hydrolase-type domain containing protein.
Os06g0185100	2.11333	0.0633333	4.23333	0.08	0.253333	-5.06041	Down	2.98e-07	3.61e-06	6.06269	Up	2.46e-09	1.59e-07	0.337035	--	0.942256	1	2	--	0.547655	0.790982	Similar to estradiol 17-beta-dehydrogenase 8.
Os04g0173800	14.4233	0.45	4.91333	5.21667	5.97667	-5.00234	Down	1.51e-42	4.27e-40	3.44871	Up	6.64e-06	0.000164229	3.53513	--	0.0868985	0.244788	3.73134	--	1	1	Lectin precursor (Agglutinin).
Os01g0821300	1.55333	0.05	2.18667	0.183333	0.203333	-4.9573	Down	4.59e-07	5.3e-06	5.45066	Up	2.76e-09	1.75e-07	1.87447	--	0.359714	0.593901	2.02385	--	0.319258	0.608207	Hypothetical conserved gene.
Os07g0235700	0.3	0.01	0.326667	0.123333	0.273333	-4.90689	Down	0.00249071	0.0102516	5.02975	Up	0.00202379	0.0179667	3.62449	--	0.299302	1	4.77259	--	0.0356413	0.152784	Similar to cDNA clone:J023006M12 full insert sequence.
Os12g0224400	1.01333	0.04	0.646667	0.233333	0.463333	-4.66297	Down	5.9e-09	9.98e-08	4.01495	Up	0.000796337	0.00860992	2.54432	--	0.313833	0.549604	3.53398	--	0.0604613	0.219729	Similar to Exostosin family protein expressed.
Os01g0211200	2.57333	0.103333	2.52333	0.11	0.283333	-4.63826	Down	5.33e-13	1.76e-11	4.60995	Up	6.18e-12	6.37e-10	0.0901978	--	0.98095	0.991497	1.45519	--	0.262282	0.546629	Cytochrome P450 family protein.
Os01g0566800	0.896667	0.0366667	0.403333	0.0366667	0.203333	-4.61203	Down	6.62e-08	9.13e-07	3.45943	Up	0.00114731	0.0114971	0	--	0.980648	1	2.47131	--	0.254835	0.537301	Hypothetical conserved gene.
Os06g0611300	2.28333	0.103333	1.63667	0.573333	0.696667	-4.46576	Down	1.55e-07	1.99e-06	3.98538	Up	1.7e-06	5.1e-05	2.47207	--	0.245604	0.476424	2.75316	--	0.127305	0.355674	Conserved hypothetical protein.
Os05g0478400	0.51	0.0233333	0.336667	0.13	0.323333	-4.45003	Down	0.000956313	0.00454787	3.85086	Up	0.00640113	0.0437421	2.47805	--	0.468859	1	3.79256	--	0.03156	0.139914	Similar to WRKY transcription factor 48.
Os01g0216400	2.21	0.103333	1.04333	0.756667	0.263333	-4.41867	Down	4.82e-08	6.85e-07	3.33582	Up	0.00211817	0.0186379	2.87235	--	0.11293	0.289706	1.34958	--	0.380124	0.666939	Lipase GDSL domain containing protein.
Os12g0438400	0.996667	0.0466667	0.363333	0.123333	0.306667	-4.41665	Down	1.59e-12	4.89e-11	2.96083	Up	0.00029061	0.00384586	1.4021	--	0.202886	0.424133	2.71621	--	0.0201471	0.100765	Hypothetical conserved gene.
Os04g0553650	5.81667	0.273333	2.66667	0.856667	0.436667	-4.41146	Down	6.21e-07	6.95e-06	3.2863	Up	0.00173982	0.0160386	1.64807	--	0.548283	0.748078	0.675871	--	0.785357	0.918663	Similar to Pectinesterase.
Os02g0773600	1.21	0.06	0.713333	0.14	0.103333	-4.3339	Down	0.000265717	0.00149694	3.57154	Up	0.00657834	0.0446189	1.22239	--	0.658404	0.822425	0.784271	--	0.852495	0.947395	Hypothetical conserved gene.
Os06g0577350	0.863333	0.0466667	0.51	0.176667	0.06	-4.20945	Down	3.58e-06	3.33e-05	3.45003	Up	0.000405151	0.00503917	1.92057	--	0.28737	0.523158	0.36257	--	0.884235	0.959436	Hypothetical protein.
Os10g0351500	2.01	0.11	1.38	0.45	0.47	-4.19162	Down	1.72e-06	1.72e-05	3.64909	Up	0.000359308	0.00455437	2.03242	--	0.59997	0.781882	2.09516	--	0.270692	0.556184	Tyrosine protein kinase domain containing protein.
Os07g0551600	1.03333	0.0633333	1.26667	0.09	0.193333	-4.0282	Down	4.42e-08	6.33e-07	4.32193	Up	1.58e-06	4.78e-05	0.50696	--	0.729084	0.864472	1.61005	--	0.386539	0.672607	Similar to Cellulose synthase-like CslF9.
Os06g0311000	0.65	0.04	0.463333	0.133333	0.386667	-4.02237	Down	0.00365236	0.0141383	3.53398	Up	0.00584174	0.0407744	1.73697	--	0.599244	0.781505	3.27302	--	0.153889	0.398894	Hypothetical conserved gene.
Os05g0107101	13.7067	0.856667	4.02	1.37333	3.07667	-4	Down	1.47e-29	2.28e-27	2.23039	Up	0.000510037	0.00605295	0.680876	--	0.248582	0.479763	1.84456	--	0.0324398	0.142775	Conserved hypothetical protein.
Os09g0328600	2.37667	0.15	1.28	0.453333	0.203333	-3.98591	Down	2.35e-08	3.55e-07	3.09311	Up	0.00286374	0.0236732	1.59561	--	0.161938	0.366432	0.438884	--	0.768092	0.910346	Hypothetical conserved gene.
Os04g0310100	10.6833	0.676667	22.63	0.02	3.24667	-3.98077	Down	4.59e-07	5.3e-06	5.06365	Up	1.44e-16	2.89e-14	-5.08037	--	0.000323403	0.00344764	2.26244	--	0.107035	0.318363	Similar to H0211A12.12 protein.
Os04g0308500	12.0233	0.766667	25.8167	0.0633333	3.74	-3.97109	Down	3.44e-07	4.11e-06	5.07356	Up	1.19e-17	2.77e-15	-3.59756	--	0.000390577	0.00402661	2.28637	--	0.0974804	0.29999	Similar to H0211A12.12 protein.
Os08g0566100	2.11333	0.14	1.04	0.26	0.46	-3.91602	Down	1.23e-17	7.09e-16	2.89308	Up	3.62e-08	1.7e-06	0.893085	--	0.663431	0.825166	1.71621	--	0.0654441	0.231418	Protein of unknown function DUF239 plant domain containing protein.
Os10g0512450	0.546667	0.0366667	1.04667	0.593333	0.503333	-3.89812	Down	0.0148337	0.0453327	4.83519	Up	0.000332863	0.00429461	4.0163	--	0.0225129	0.095213	3.77897	--	0.10866	0.321298	Hypothetical protein.
MSTRG.5975	29.0467	1.96667	29.7633	0.166667	4.02667	-3.88455	Down	3.2e-23	3e-21	3.91971	Up	1.67e-12	1.85e-10	-3.56071	--	0.000201494	0.00232949	1.03383	--	0.438826	0.71478	PREDICTED: glycine-rich cell wall structural protein 2-like [Oryza brachyantha]
Os09g0132900	0.773333	0.0533333	0.38	0.18	0.133333	-3.85798	Down	1.7e-06	1.71e-05	2.83289	Up	0.00564248	0.0397094	1.75489	--	0.307585	0.543646	1.32193	--	0.43966	0.715394	Lipase GDSL domain containing protein.
Os04g0308400	14.18	0.996667	29.82	0.28	5.16333	-3.8306	Down	2.59e-07	3.19e-06	4.90303	Up	1.66e-16	3.28e-14	-1.83168	--	0.231844	0.459859	2.37312	--	0.0917379	0.288974	Similar to H0211A12.13 protein.
Os01g0249700	3.25667	0.23	2.30333	0.606667	0.516667	-3.82369	Down	1.26e-05	0.000100655	3.32402	Up	0.00127241	0.0124917	1.39927	--	0.336252	0.571881	1.1676	--	0.555112	0.795588	Heavy metal-associated domain HMA domain containing protein.
Os06g0234900	0.466667	0.0333333	0.553333	0.04	0.31	-3.80735	Down	0.00371332	0.0143329	4.05311	Up	0.00426794	0.0320833	0.263034	--	0.977597	1	3.21723	--	0.30173	0.590649	Domain of unknown function DUF231 plant domain containing protein.
Os06g0513050	477.283	34.7167	814.307	14.57	70.84	-3.78115	Down	0.000957112	0.00454813	4.55187	Up	5.9e-05	0.00103206	-1.25263	--	0.387689	0.62106	1.02894	--	0.53183	0.780915	Conserved hypothetical protein.
Os12g0569200	279.14	20.37	229.76	8.88	51.9867	-3.77647	Down	3.83e-06	3.54e-05	3.49561	Up	0.00024582	0.00335913	-1.19781	--	0.559652	0.755143	1.3517	--	0.496038	0.756367	Conserved hypothetical protein.
Os07g0633400	0.583333	0.0433333	0.533333	0.163333	0.103333	-3.75077	Down	1.14e-07	1.5e-06	3.62149	Up	1.59e-05	0.000345161	1.91427	--	0.0587144	0.187078	1.25376	--	0.432678	0.709554	IQ calmodulin-binding region domain containing protein.
Os07g0255900	0.973333	0.0733333	0.713333	0.103333	0.306667	-3.73039	Down	1.41e-05	0.000111746	3.28204	Up	0.000744499	0.00813811	0.494765	--	0.881627	0.946172	2.06413	--	0.272396	0.558003	Domain of unknown function DUF231 plant domain containing protein.
Os06g0725500	1.27	0.106667	2.25667	0.09	0.216667	-3.57365	Down	2.34e-05	0.000175529	4.40301	Up	3.47e-09	2.15e-07	-0.245112	--	0.886569	1	1.02237	--	0.576785	0.808418	Protein of unknown function DUF241 plant family protein.
Os10g0352000	6.76	0.573333	1.95333	1.69333	0.806667	-3.55958	Down	5.11e-15	2.23e-13	1.76849	Up	0.00354202	0.0278866	1.56242	--	0.0455963	0.156818	0.492598	--	0.463911	0.732263	Conserved hypothetical protein.
Os05g0457600	0.38	0.0333333	0.503333	0.0166667	0.0766667	-3.51096	Down	0.000581369	0.00295193	3.91648	Up	2.19e-05	0.000450952	-1	--	0.667092	1	1.20163	--	0.501969	0.760114	Similar to Avr9/Cf-9 rapidly elicited protein 137.
Os04g0443900	0.983333	0.0866667	1.52667	0.216667	0.283333	-3.50413	Down	5.29e-06	4.7e-05	4.13876	Up	2.47e-12	2.67e-10	1.32193	--	0.128444	0.314902	1.70895	--	0.0875157	0.280373	Similar to RuBisCO large subunit-binding protein subunit beta chloroplastic.
Os04g0495000	0.636667	0.0566667	0.54	0.07	0.146667	-3.48997	Down	0.00109383	0.00509051	3.25239	Up	0.0042577	0.0320225	0.304855	--	0.92562	1	1.37197	--	0.534735	0.782766	Similar to OSIGBa0103O01.12 protein.
Os06g0513781	164.32	14.91	232.163	6.13667	33.95	-3.46216	Down	0.000510542	0.00264248	3.96079	Up	7.82e-05	0.00130821	-1.28075	--	0.473261	0.692393	1.18713	--	0.450955	0.723766	Conserved hypothetical protein.
Os06g0514800	155.237	14.11	233.643	6.08667	32.2533	-3.45968	Down	0.000682954	0.00339606	4.04952	Up	4.92e-05	0.000884415	-1.21299	--	0.509058	0.720477	1.19273	--	0.446461	0.720838	Conserved hypothetical protein.
Os02g0114100	3.96	0.36	1.72333	0.0966667	0.803333	-3.45943	Down	5.14e-09	8.82e-08	2.25913	Up	0.000210815	0.00296567	-1.89691	--	0.282056	0.517229	1.158	--	0.333815	0.623077	Protein of unknown function DUF6 transmembrane domain containing protein.
Os04g0310200	8.88333	0.81	22.45	0.23	3.38667	-3.45511	Down	5.81e-05	0.000390855	4.79265	Up	6.76e-17	1.43e-14	-1.81629	--	0.237928	0.467389	2.06387	--	0.135181	0.368908	Similar to H0211A12.13 protein.
Os11g0439600	4.23	0.393333	3.11333	0.366667	0.923333	-3.42683	Down	2.04e-13	7.18e-12	2.98464	Up	1.09e-06	3.45e-05	-0.101283	--	0.902548	0.956463	1.2311	--	0.367401	0.655624	Similar to Nod factor binding lectin-nucleotide phosphohydrolase.
Os10g0450000	8.20667	0.79	5.38333	0.39	2.26667	-3.37687	Down	1.33e-08	2.11e-07	2.76858	Up	9.95e-05	0.00158944	-1.01838	--	0.335028	0.570624	1.52065	--	0.293324	0.581431	Protein of unknown function DUF247 plant family protein.
Os04g0494800	2.97333	0.293333	1.77	0.296667	0.763333	-3.34147	Down	2.42e-10	5.37e-09	2.59314	Up	0.000162391	0.00237726	0.0163018	--	0.971787	0.988109	1.37977	--	0.164892	0.415657	Protein of unknown function DUF642 family protein.
Os06g0693100	0.3	0.03	1.18	0.103333	0.113333	-3.32193	Down	0.000232776	0.0013349	5.29768	Up	2.93e-16	5.59e-14	1.78427	--	0.173054	0.383041	1.91754	--	0.148228	0.390572	NB-ARC domain containing protein.
Os05g0138200	8.41667	0.846667	4.07	0.323333	2	-3.31338	Down	1.94e-20	1.44e-18	2.26516	Up	0.000221852	0.00309553	-1.38877	--	0.360665	0.594646	1.24013	--	0.252567	0.534572	Similar to Chitinase (Class II) (EC 3.2.1.14).
Os06g0513862	129.273	13.0267	182.91	5.52333	28.5667	-3.31088	Down	0.000745265	0.0036636	3.81159	Up	9.48e-05	0.00153303	-1.23786	--	0.486676	0.70359	1.13286	--	0.475762	0.741122	Conserved hypothetical protein.
Os04g0177300	1.11667	0.12	0.896667	0.186667	0.266667	-3.21809	Down	7.19e-11	1.73e-09	2.90154	Up	4.05e-10	3.09e-08	0.63743	--	0.528756	0.735197	1.152	--	0.261447	0.545528	HIP116 Rad5p N-terminal domain containing protein.
Os06g0727700	3.05333	0.33	1.18	0.0466667	0.823333	-3.20985	Down	1e-11	2.78e-10	1.83825	Up	0.00170352	0.0157479	-2.822	--	0.0518081	0.171179	1.31901	--	0.274355	0.560452	Protein of unknown function DUF707 family protein.
Os09g0551800	0.553333	0.06	0.35	0.09	0.143333	-3.20511	Down	1.74e-07	2.22e-06	2.54432	Up	3.75e-05	0.000701053	0.584963	--	0.78978	0.898631	1.25634	--	0.0909134	0.287577	Helicase-like DEXD box c2 type domain containing protein.
Os06g0115700	17.7767	2.04	15.09	2.9	4.65333	-3.12334	Down	2.19e-12	6.63e-11	2.88695	Up	1.98e-08	1e-06	0.507484	--	0.548751	0.748222	1.1897	--	0.205927	0.475587	Conserved hypothetical protein.
Os02g0710700	1.16	0.133333	1.15	0.263333	0.42	-3.12102	Down	0.00025389	0.00143893	3.10852	Up	0.00102256	0.0105392	0.981853	--	0.596478	0.779514	1.65535	--	0.234908	0.513054	Hypothetical conserved gene.
Os09g0400300	6.07333	0.713333	4.44333	1.52667	0.82	-3.08984	Down	2.3e-14	9.18e-13	2.63899	Up	5.12e-09	3.03e-07	1.09774	--	0.361891	0.595721	0.201048	--	0.764761	0.908665	Similar to Cinnamyl alcohol dehydrogenase (EC 1.1.1.195).
Os08g0168700	1.54667	0.183333	3.30333	0.0566667	1.09667	-3.07662	Down	0.000221196	0.00127532	4.17138	Up	3.58e-07	1.29e-05	-1.6939	--	0.345887	0.581606	2.58058	--	0.088901	0.283318	Similar to cytokinin-O-glucosyltransferase 2.
Os07g0104366	13.5	1.61333	6.58667	1.14333	3.65667	-3.06484	Down	1.22e-14	5.09e-13	2.0295	Up	0.00116614	0.011652	-0.496798	--	0.649386	0.815976	1.18048	--	0.183904	0.444474	Hypothetical protein.
Os06g0514100	27.1433	3.34333	57.9667	1.38	6.72	-3.02124	Down	1.23e-05	9.86e-05	4.11586	Up	5.69e-05	0.000998987	-1.27662	--	0.284603	0.520084	1.00717	--	0.446372	0.72074	Conserved hypothetical protein.
Os02g0764200	4.93	0.616667	2.70667	0.693333	1.53333	-2.99902	Down	2.53e-12	7.55e-11	2.13395	Up	0.000713235	0.00787281	0.169058	--	0.978475	0.99063	1.31411	--	0.215428	0.488453	Similar to Xyloglucan fucosyltransferase-like [Oryza sativa (japonica cultivar-group)].
MSTRG.670	1.68667	0.22	1.19667	0.343333	0.613333	-2.9386	Down	1.02e-07	1.36e-06	2.44345	Up	2.39e-05	0.000487196	0.642106	--	0.5138	0.724226	1.47917	--	0.0862029	0.277689	PREDICTED: translation initiation factor IF-2 [Oryza sativa Japonica Group]
Os03g0758700	0.56	0.0733333	0.496667	0.2	0.156667	-2.93289	Down	0.00204049	0.00866423	2.75974	Up	0.00562223	0.0396044	1.44746	--	0.452938	0.676487	1.09516	--	0.437363	0.713836	WD40 repeat domain containing protein.
Os12g0227500	14.4833	1.91	47.45	0.953333	5.73333	-2.92275	Down	6.14e-07	6.89e-06	4.63476	Up	7.24e-13	8.52e-11	-1.00252	--	0.236254	0.465375	1.5858	--	0.192301	0.456333	Similar to Beta-glucosidase aggregating factor.
Os10g0566800	3.18333	0.43	2.39667	0.803333	1.61333	-2.88813	Down	1.25e-12	3.93e-11	2.47862	Up	0.000103169	0.00163838	0.901662	--	0.384094	0.61775	1.90764	--	0.0737392	0.250489	Haem peroxidase plant/fungal/bacterial family protein.
Os01g0726100	4.98	0.686667	3.94	1.90333	2.29	-2.85846	Down	1.21e-11	3.31e-10	2.52051	Up	1.33e-06	4.12e-05	1.47085	--	0.021098	0.0907816	1.73767	--	0.0613791	0.221801	Pollen Ole e 1 allergen and extensin domain containing protein.
Os08g0552000	1.16333	0.166667	0.703333	0.27	0.566667	-2.80323	Down	1.32e-05	0.000105425	2.07724	Up	0.00623465	0.0428638	0.695994	--	0.40159	0.632343	1.76553	--	0.0109953	0.0648659	Hypothetical conserved gene.
Os05g0119600	1.22333	0.176667	1.15	0.41	0.406667	-2.79172	Down	0.000144911	0.000873185	2.70253	Up	0.000371436	0.00468838	1.21459	--	0.42883	0.656373	1.20282	--	0.249361	0.530875	Similar to Protein binding protein.
Os10g0458900	1.62333	0.24	1.87667	0.363333	1.41667	-2.75785	Down	5.29e-09	9.07e-08	2.96707	Up	1.59e-06	4.81e-05	0.598259	--	0.710135	0.853605	2.56139	--	0.0211383	0.104477	Exostosin-like family protein.
Os02g0785700	4.05333	0.61	2.82333	0.853333	1.68	-2.73223	Down	2.5e-08	3.75e-07	2.21052	Up	0.000481096	0.00575768	0.4843	--	0.609948	0.788324	1.46158	--	0.156003	0.402055	Hypothetical conserved gene.
Os05g0376600	0.726667	0.113333	0.613333	0.31	0.16	-2.68072	Down	0.000109628	0.000684864	2.4361	Up	4.84e-05	0.000872267	1.4517	--	0.0787095	0.22874	0.4975	--	0.596769	0.821564	BRCT domain containing protein.
Os07g0625800	15.6467	2.46	13.3667	6.5	7.56667	-2.66913	Down	2.37e-07	2.94e-06	2.44191	Up	2.69e-06	7.62e-05	1.40178	--	0.0164804	0.0760153	1.621	--	0.0149607	0.0812735	Plant lipid transfer protein/Par allergen family protein.
Os04g0604800	2.06333	0.333333	2.39	0.25	0.796667	-2.62994	Down	0.000556322	0.00283784	2.84197	Up	0.000317967	0.00414164	-0.415037	--	0.766263	0.885815	1.25701	--	0.447151	0.721306	Similar to OSIGBa0118P15.11 protein.
Os05g0384300	0.926667	0.15	0.713333	0.66	0.503333	-2.62709	Down	3.86e-05	0.000273818	2.24961	Up	0.000161082	0.00236391	2.1375	--	0.0166741	0.0765728	1.74655	--	0.0311651	0.138875	Peptidase aspartic catalytic domain containing protein.
Os09g0101800	0.986667	0.16	0.786667	0.41	0.36	-2.62449	Down	3.95e-11	9.88e-10	2.29768	Up	3.95e-07	1.42e-05	1.35755	--	0.0144121	0.0686826	1.16993	--	0.0394898	0.163843	Quinoprotein amine dehydrogenase beta chain-like domain containing protein.
Os06g0131800	2.34	0.4	2.37667	0.856667	1.31333	-2.54844	Down	0.000202392	0.00117778	2.57087	Up	2.2e-05	0.000452806	1.09873	--	0.165957	0.372291	1.71516	--	0.023348	0.112508	Hypothetical protein.
Os10g0459600	0.386667	0.0666667	0.436667	0.176667	0.25	-2.53605	Down	0.00961302	0.0317663	2.71149	Up	0.00688338	0.0461621	1.40599	--	0.5841	0.771329	1.90689	--	0.193371	0.457688	Similar to Xyloglucan galactosyltransferase KATAMARI 1 (EC 2.4.1.-) (MURUS3 protein).
Os08g0397800	4.52333	0.783333	4.68	1.48667	1.57667	-2.52969	Down	8e-09	1.32e-07	2.57881	Up	8.04e-09	4.49e-07	0.924383	--	0.207036	0.429139	1.00918	--	0.258871	0.542709	Conserved hypothetical protein.
Os06g0272850	3.39333	0.593333	1.66	1.43333	0.566667	-2.51579	Down	8.95e-07	9.63e-06	1.48427	Up	0.00453738	0.0335498	1.27246	--	0.0724319	0.215814	-0.0663425	--	0.851718	0.946995	Domain of unknown function DUF231 plant domain containing protein.
Os11g0575600	12.66	2.23	6.72333	0.436667	4.68667	-2.50516	Down	6.26e-14	2.35e-12	1.59213	Up	0.00608628	0.0420766	-2.35244	--	1	1	1.07152	--	0.455556	0.726435	Similar to Lipoxygenase (Fragment).
Os03g0363600	1.41	0.25	1.65667	0.47	0.63	-2.4957	Down	3.88e-07	4.57e-06	2.72828	Up	1.82e-09	1.22e-07	0.910733	--	0.235982	0.464901	1.33342	--	0.0128037	0.072232	Similar to Sugar transporter-like protein.
Os03g0144500	2.15333	0.393333	1.84	0.886667	1.5	-2.45275	Down	6.72e-09	1.13e-07	2.22588	Up	0.000172783	0.00251455	1.17264	--	1	1	1.93114	--	0.0895509	0.284808	Similar to Xyloglucan galactosyltransferase KATAMARI 1 (EC 2.4.1.-) (MURUS3 protein).
Os02g0115950	0.73	0.14	0.586667	0.386667	0.406667	-2.38247	Down	0.000701922	0.00347782	2.06711	Up	0.00444834	0.0330804	1.46566	--	0.0803961	0.232116	1.53842	--	0.0605221	0.219835	Glutamate dehydrogenase NAD-specific domain containing protein.
Os04g0522100	17.53	3.39	14.7933	8.81	9.59333	-2.37047	Down	2.31e-09	4.25e-08	2.12559	Up	0.000423262	0.00521002	1.37786	--	1	1	1.50075	--	0.178609	0.436003	Similar to OSIGBa0131L05.12 protein.
Os08g0253800	13.06	2.59667	11.2733	1.50667	5.27	-2.33042	Down	2.44e-07	3.01e-06	2.11818	Up	2.17e-05	0.00044648	-0.785301	--	0.660465	0.823392	1.02114	--	0.475332	0.740713	Similar to Cellulose synthase-like family C3 protein (Fragment).
Os07g0211601	0.126667	0.0266667	0.25	0.09	0.123333	-2.24793	Down	0.0142167	0.0437863	3.22882	Up	0.000234811	0.00323841	1.75489	--	0.0993638	0.266702	2.20945	--	0.0316491	0.140175	Hypothetical gene.
MSTRG.17505	1.32667	0.28	1.11667	0.67	0.776667	-2.24431	Down	0.000343879	0.00187064	1.9957	Up	0.00250136	0.0212559	1.25873	--	0.168972	0.376813	1.47187	--	0.309874	0.598208	PREDICTED: universal stress protein PHOS32 [Eucalyptus grandis]
Os05g0510600	3.94333	0.85	2.97667	2.12333	2.03	-2.21388	Down	9.15e-10	1.83e-08	1.80816	Up	1.48e-06	4.52e-05	1.3208	--	0.0222132	0.0942655	1.25594	--	0.0120781	0.0693041	Similar to tyrosine/DOPA decarboxylase 1.
Os09g0526500	1.40667	0.306667	1.23	0.493333	0.65	-2.19754	Down	0.00108226	0.0050439	2.00392	Up	0.000664732	0.0074466	0.685891	--	0.471004	0.690707	1.08377	--	0.169046	0.421843	C2 calcium/lipid-binding region CaLB domain containing protein.
Os03g0856700	7.43333	1.65667	3.82667	4.12	2.63	-2.16573	Down	2.31e-09	4.24e-08	1.2078	Up	0.00473628	0.0347188	1.31436	--	0.0528222	0.173827	0.666779	--	0.195973	0.460702	Gibberellin 20 oxidase 1 (EC 1.14.11.-) (Gibberellin C-20 oxidase 1) (GA 20-oxidase 1)
Os10g0337600	4.54333	1.04667	3.03333	2.29333	1.71667	-2.11795	Down	3.23e-07	3.88e-06	1.5351	Up	0.000587788	0.00677051	1.13164	--	0.0133998	0.0652823	0.713808	--	0.180812	0.439465	Similar to Got1-like family protein expressed.
Os10g0117000	0.613333	0.143333	0.413333	0.18	0.3	-2.0973	Down	1.36e-06	1.4e-05	1.52793	Up	0.00143287	0.0137363	0.328623	--	0.679315	0.834411	1.06559	--	0.0649847	0.230345	Similar to predicted protein.
Os03g0172850	9.09333	2.16667	9.29333	4.05667	6.97	-2.06933	Down	0.000518562	0.00267988	2.10072	Up	0.00131554	0.012847	0.904818	--	1	1	1.68568	--	0.411725	0.692453	Proteinase inhibitor I25 cystatin conserved region domain containing protein.
Os07g0559700	71.3167	17.3333	46.6633	44.32	35.6833	-2.04069	Down	1.41e-13	5.06e-12	1.42874	Up	3.73e-07	1.34e-05	1.35441	--	0.0137583	0.0664509	1.0417	--	0.0110413	0.0650225	Similar to Monosaccharide transporter 3.
Os05g0561400	13.0133	3.19667	27.46	12.3867	16.5033	-2.02535	Down	0.0113502	0.0364439	3.10269	Up	0.000292722	0.00386695	1.95415	--	0.0715039	0.213973	2.36812	--	0.0315605	0.139914	Conserved hypothetical protein.
Os09g0452400	1.38333	0.346667	1.47333	0.603333	0.726667	-1.99653	Down	5.13e-05	0.000350942	2.08746	Up	3.25e-05	0.000626221	0.799406	--	0.639899	0.809169	1.06774	--	0.479201	0.743304	Peptidase A1 domain containing protein.
Os04g0479000	1.18667	0.3	0.893333	0.236667	0.706667	-1.98388	Down	4.18e-06	3.82e-05	1.57424	Up	0.0036765	0.028695	-0.342106	--	0.757163	0.881854	1.23607	--	0.079347	0.263521	Similar to OSIGBa0116M22.9 protein.
Os05g0531400	5.44333	1.37667	7.88	2.22	3.18	-1.98331	Down	7.27e-05	0.00047712	2.51702	Up	3.59e-08	1.69e-06	0.68938	--	1	1	1.20785	--	0.338034	0.627404	Pollen Ole e 1 allergen and extensin domain containing protein.
Os01g0702700	5.99333	1.54333	4.32	1.3	3.35667	-1.95731	Down	4.55e-08	6.49e-07	1.48498	Up	1.99e-05	0.000417712	-0.247538	--	0.585845	0.772419	1.12098	--	0.056332	0.209426	Similar to Transcription factor MYB86 (Myb-related protein 86) (AtMYB86) (Myb homolog 4) (AtMyb4).
Os04g0469300	3.76	0.986667	3.13667	2.24667	2.52667	-1.9301	Down	8.94e-05	0.000575271	1.6686	Up	0.00353535	0.0278562	1.18715	--	0.0781815	0.227576	1.3566	--	0.0288283	0.13129	Similar to ATFP4.
Os06g0234800	0.923333	0.243333	1.01333	0.6	0.49	-1.92392	Down	0.00109488	0.00509279	2.0581	Up	0.000293289	0.00387184	1.30203	--	0.150482	0.349927	1.00985	--	0.170314	0.424052	Conserved hypothetical protein.
Os04g0518800	2.42667	0.646667	2.85	1.29667	0.866667	-1.90788	Down	0.000269774	0.00151712	2.13987	Up	7.15e-08	3.14e-06	1.00371	--	0.0716301	0.214184	0.422455	--	0.543522	0.788558	Cytokinin synthesis enzyme Cytokinin-activating enzyme Regulation of awn length and grain production
Os01g0848200	1.09333	0.3	2.72	0.88	1.06667	-1.8657	Down	0.00876987	0.0294523	3.18057	Up	1.33e-15	2.3e-13	1.55254	--	0.123734	0.307696	1.83007	--	0.0202056	0.100975	Similar to Delta 1-pyrroline-5-carboxylate synthetase (P5CS) [Includes: Glutamate 5-kinase (EC 2.7.2.11) (Gamma-glutamyl kinase) (GK)%3B Gamma-glutamyl phosphate reductase (GPR) (EC 1.2.1.41) (Glutamate-5-semialdehyde dehydrogenase) (Glutamyl-gamma-semialdehyde dehydrogena
Os08g0533300	3.42	0.943333	2.69667	2.07	1.36667	-1.85816	Down	3.98e-09	6.94e-08	1.51534	Up	3.47e-06	9.48e-05	1.13379	--	0.0634271	0.197358	0.534822	--	0.169431	0.42248	Similar to ACR5.
Os12g0549700	4.55667	1.27	2.68	2.59667	1.59333	-1.84315	Down	3.09e-07	3.73e-06	1.0774	Up	0.00390535	0.0299242	1.03183	--	0.00978797	0.0513171	0.32722	--	0.481848	0.745405	Hypothetical conserved gene.
Os01g0936900	1.69333	0.476667	2.92	1.00667	1.82	-1.82881	Down	0.000890948	0.00427644	2.61492	Up	3.49e-05	0.000663552	1.07853	--	1	1	1.93289	--	0.191211	0.45489	Peptidase A1 domain containing protein.
Os05g0431750	7.29333	2.28	6.62333	3.80667	4.83333	-1.67754	Down	0.000364536	0.00196793	1.53852	Up	0.000282339	0.00376318	0.739494	--	0.103701	0.274338	1.08398	--	0.0240059	0.11469	Hypothetical protein.
Os08g0454600	2.58667	0.813333	2.61667	2.27	1.75	-1.66918	Down	0.000255982	0.00144951	1.68581	Up	0.000754868	0.00823031	1.48077	--	0.012195	0.0607849	1.10544	--	0.0204686	0.101918	Hypothetical protein.
Os01g0588100	33.7367	10.6433	102.35	29.46	20.6167	-1.66437	Down	5.13e-08	7.25e-07	3.26549	Up	3e-21	9.93e-19	1.46881	--	0.0231294	0.0972473	0.953861	--	1.97e-05	0.000356906	Similar to Hypersensitive-induced response protein.
Os06g0289900	1.08333	0.343333	2.02667	0.78	0.933333	-1.6578	Down	0.00196034	0.00836613	2.56143	Up	1.06e-09	7.56e-08	1.18386	--	0.0962385	0.261268	1.44278	--	0.0443409	0.177994	UDP-glucuronosyl/UDP-glucosyltransferase family protein.
Os10g0522200	3.08667	0.996667	3.76333	1.92333	2.24333	-1.63087	Down	0.0048437	0.0179812	1.91683	Up	0.00534691	0.0380714	0.948426	--	0.143114	0.338165	1.17046	--	0.0993242	0.303282	Hypothetical protein.
Os08g0160600	1.24667	0.413333	1.14	1.01667	0.72	-1.5927	Down	0.000837449	0.00405069	1.46366	Up	0.0012412	0.0122316	1.29847	--	0.014664	0.0694671	0.800691	--	0.189233	0.451893	Hypothetical protein.
Os03g0287400	2.47	0.823333	4.39333	2.11333	1.52	-1.58496	Down	0.000130001	0.000795339	2.41577	Up	6.49e-14	8.83e-12	1.35997	--	0.174209	0.384644	0.884523	--	0.207488	0.477879	Similar to LOB domain protein 4.
Os03g0281100	3.67	1.26667	3.67667	2.01333	2.74	-1.53474	Down	9.94e-06	8.17e-05	1.53736	Up	1.2e-05	0.000272049	0.668549	--	0.116103	0.295024	1.11314	--	0.0208046	0.103217	Ankyrin repeat containing protein.
Os01g0653100	1.58667	0.55	1.90333	0.52	1.10667	-1.5285	Down	0.000636828	0.00320047	1.79102	Up	0.000244602	0.00334402	-0.08092	--	0.885397	0.948259	1.00872	--	0.197693	0.463459	Conserved hypothetical protein.
Os04g0379933	0.6	0.22	0.693333	0.54	0.48	-1.44746	Down	0.0130539	0.0408708	1.65605	Up	0.00754867	0.0492483	1.29546	--	0.0165737	0.0762783	1.12553	--	0.122049	0.345725	Hypothetical conserved gene.
Os01g0937100	5.75333	2.13333	11.9067	5.32	3.13667	-1.43129	Down	2.6e-05	0.000192764	2.48059	Up	7.08e-06	0.000173584	1.31832	--	0.0247476	0.101626	0.556123	--	0.472509	0.738542	Similar to Xylanase inhibitor precursor (Xylanase inhibitor TAXI-I).
Os01g0739700	1.70667	0.636667	2.36333	1.47	1.40667	-1.42257	Down	0.0107749	0.034948	1.89221	Up	4.58e-05	0.000832646	1.20721	--	0.021292	0.0912962	1.14367	--	0.0511013	0.196888	Glycoside hydrolase family 17 protein.
Os10g0370500	58.54	22.3167	68.7033	52.1533	27.6933	-1.3913	Down	2.52e-08	3.78e-07	1.62226	Up	3.5e-05	0.000665155	1.22464	--	0.0621981	0.194604	0.311417	--	0.659813	0.858834	Glycoside hydrolase catalytic core domain containing protein.
Os02g0102200	3.54	1.39667	3.44333	4.36667	3.03333	-1.34176	Down	0.00680966	0.0238626	1.30182	Up	0.00752249	0.0491205	1.64454	--	0.0343536	0.128517	1.11892	--	0.113012	0.328907	Similar to Transmembrane amino acid transporter protein.
Os07g0236300	5.14	2.16333	5.97333	4.38667	3.64667	-1.24851	Down	0.000464825	0.00243806	1.46528	Up	7.65e-06	0.000185167	1.01987	--	0.0294157	0.115223	0.753322	--	0.0276539	0.127442	Hypothetical gene.
Os02g0520100	6.01667	2.69667	8.97	5.40667	2.77	-1.15779	Down	0.00294544	0.0117995	1.73393	Up	9.49e-06	0.000223049	1.00356	--	0.0152645	0.071654	0.0387088	--	0.97583	0.991201	NUDIX hydrolase domain containing protein.
Os04g0457200	3.30667	1.54667	3.27	2.57	3.48333	-1.09622	Down	0.00327996	0.0129113	1.08013	Up	0.00268517	0.0225221	0.732606	--	0.0770387	0.22523	1.17131	--	0.0154609	0.0832867	Similar to H0523F07.11 protein.
Os01g0110100	1.29	0.62	1.63667	1.33333	0.846667	-1.05703	Down	0.00226908	0.00947861	1.40042	Up	2.05e-05	0.000426767	1.1047	--	0.0209913	0.0905613	0.449526	--	0.417445	0.697579	Phosphate (Pi) transporter Pi homeostasis
Os04g0670100	5.23	2.59333	6.60333	7.99333	6.24	-1.012	Down	0.0151451	0.0461255	1.34839	Up	0.00384445	0.0296024	1.62399	--	0.0206729	0.0895685	1.26674	--	0.0378587	0.159255	Similar to H0818H01.13 protein.
Os07g0466000	9.54667	0.0266667	1.55	0.02	0.01	-8.48382	Down	5.75e-26	6.56e-24	5.86109	Up	5.77e-08	2.6e-06	-0.415037	--	0.927534	1	-1.41504	--	0.482424	1	Conserved hypothetical protein.
Os05g0217800	12.6633	0.0633333	2.74333	0.01	0.0133333	-7.64348	Down	2.25e-27	2.95e-25	5.43682	Up	5.68e-10	4.28e-08	-2.66297	--	0.311158	1	-2.24793	--	0.401173	1	BURP domain containing protein.
Os05g0191700	1.56333	0.0166667	0.706667	0.01	0.01	-6.55152	Down	4.27e-06	3.9e-05	5.40599	Up	5.71e-05	0.00100295	-0.736966	--	0.734966	1	-0.736966	--	0.662008	1	Similar to Stem 28 kDa glycoprotein.
Os06g0294200	2.08	0.03	0.953333	0.01	0.0566667	-6.11548	Down	6.18e-26	7.03e-24	4.98995	Up	2.07e-09	1.37e-07	-1.58496	--	0.159417	1	0.917538	--	0.689982	0.873307	Conserved hypothetical protein.
Os08g0194900	0.543333	0.01	0.28	0.0133333	0.01	-5.76377	Down	4.84e-06	4.35e-05	4.80735	Up	0.000506142	0.00601152	0.415037	--	0.981662	1	0	--	0.551722	1	Hypothetical conserved gene.
Os10g0122400	20.6367	0.383333	5.42667	0.01	0.313333	-5.75047	Down	3.43e-06	3.21e-05	3.82339	Up	0.00370493	0.0288791	-5.26053	--	0.00266913	0.0190247	-0.290901	--	0.837204	0.940556	Hypothetical protein.
Os07g0638801	4.44333	0.0833333	1.33	0.01	0.1	-5.7366	Down	1.38e-21	1.15e-19	3.99639	Up	1.69e-05	0.000363557	-3.05889	--	0.107071	1	0.263034	--	0.897611	0.964065	Hypothetical protein.
Os07g0601600	10.06	0.21	3.77333	0.01	0.01	-5.5821	Down	8.65e-07	9.36e-06	4.16738	Up	1.7e-06	5.1e-05	-4.39232	--	0.0209523	0.0904659	-4.39232	--	0.0114949	0.0670012	Similar to VEP1 (VEIN PATTERNING 1)%3B binding / catalytic.
Os06g0236600	0.956667	0.02	0.46	0.01	0.0466667	-5.57994	Down	1.61e-05	0.000125828	4.52356	Up	0.000567789	0.00658814	-1	--	0.67465	1	1.22239	--	0.666538	1	Cyclin-D1-1.
Os04g0326100	0.156667	0.00333333	0.543333	0.01	0.0966667	-5.55459	Down	0.00806413	0.027472	7.34873	Up	1.6e-05	0.000346433	1.58496	--	0.885279	1	4.85798	--	0.122637	0.346592	Similar to H0107B07.2 protein.
Os11g0529900	1.08333	0.0233333	0.52	0.116667	0.05	-5.53694	Down	8.33e-08	1.13e-06	4.47805	Up	0.00103149	0.0105945	2.32193	--	0.381679	0.615451	1.09954	--	0.798307	1	Chalcone/stilbene synthase N-terminal domain containing protein.
Os03g0182000	5.05333	0.11	0.75	0.123333	0.293333	-5.52166	Down	1.6e-23	1.53e-21	2.76939	Up	4.25e-05	0.000781465	0.165059	--	0.91852	0.96348	1.41504	--	0.150265	0.393391	Similar to flavin-dependent monooxygenase 1.
Os07g0693100	0.76	0.0166667	0.316667	0.01	0.01	-5.51096	Down	3.18e-08	4.68e-07	4.24793	Up	0.00170007	0.0157258	-0.736966	--	0.566762	1	-0.736966	--	0.499972	1	Similar to Pyruvate decarboxylase isozyme 3 (EC 4.1.1.1) (PDC).
Os05g0525200	0.746667	0.0166667	0.296667	0.01	0.0166667	-5.48543	Down	3.02e-09	5.4e-08	4.15381	Up	0.000437991	0.00534931	-0.736966	--	0.451612	1	0	--	0.994397	1	Hypothetical protein.
Os06g0696450	1.03	0.0233333	3.07333	0.01	0.01	-5.46411	Down	7.18e-06	6.17e-05	7.04127	Up	2.73e-10	2.15e-08	-1.22239	--	0.67465	1	-1.22239	--	0.602727	1	Hypothetical protein.
Os03g0368150	8.91667	0.27	2.59667	0.01	0.01	-5.04547	Down	2.57e-10	5.68e-09	3.26563	Up	0.00497329	0.0360566	-4.75489	--	0.184428	1	-4.75489	--	0.137466	0.372899	Hypothetical protein.
Os03g0368000	19.16	0.593333	4.42	0.01	0.25	-5.01311	Down	5.21e-27	6.65e-25	2.89713	Up	9.54e-07	3.08e-05	-5.89077	--	2.32e-05	0.000377155	-1.24691	--	0.456587	0.727226	Similar to Peroxidase 1.
Os02g0278700	0.88	0.03	0.506667	0.01	0.01	-4.87447	Down	0.00783801	0.0268656	4.078	Up	0.0015129	0.014301	-1.58496	--	0.323897	1	-1.58496	--	0.275915	1	Similar to Kaurene synthase A (Fragment).
Os10g0552200	17.2733	0.603333	18.7767	0.0333333	1.39667	-4.83945	Down	9.16e-19	5.89e-17	4.95984	Up	7.36e-16	1.35e-13	-4.17792	--	0.0114809	0.0579486	1.21096	--	0.438793	0.71478	Plant lipid transfer protein and hydrophobic protein helical domain containing protein.
Os02g0124600	3.30667	0.116667	1.10333	0.01	0.01	-4.82491	Down	4.32e-16	2.13e-14	3.2414	Up	0.00155152	0.0146011	-3.54432	--	0.102182	1	-3.54432	--	0.0616774	1	Similar to FAD binding domain containing protein.
Os03g0145050	15.31	0.673333	5.64667	0.01	0.0833333	-4.50701	Down	1.42e-05	0.000112595	3.06801	Up	7.74e-06	0.000186974	-6.07325	--	7.51e-08	2.43e-06	-3.01436	--	0.206616	0.476523	Hypothetical gene.
Os12g0165600	0.596667	0.0266667	0.243333	0.04	0.0633333	-4.48382	Down	1.13e-07	1.49e-06	3.18982	Up	0.00311789	0.0253034	0.584963	--	0.667335	1	1.24793	--	0.546885	0.790539	Exo70 exocyst complex subunit family protein.
Os10g0111900	2.00667	0.09	0.716667	0.203333	0.19	-4.47873	Down	7.15e-11	1.73e-09	2.99331	Up	0.00412538	0.0312166	1.17585	--	0.357012	0.591728	1.078	--	0.51749	0.770786	Similar to Protein kinase domain containing protein expressed.
MSTRG.19371	1.76	0.0866667	1.19	0.01	0.0766667	-4.34395	Down	2.59e-12	7.73e-11	3.77934	Up	6.21e-10	4.63e-08	-3.11548	--	0.016215	0.0750384	-0.176878	--	0.91731	0.971564	--
Os04g0449200	5.57667	0.29	1.44	0.01	0.263333	-4.26528	Down	1.23e-22	1.11e-20	2.31194	Up	0.00117206	0.0116892	-4.85798	--	4.01e-05	0.00060226	-0.139163	--	0.884796	0.959473	Xyloglucan fucosyltransferase family protein.
Os03g0368300	10.3933	0.593333	2.86333	0.01	0.306667	-4.13067	Down	5.93e-18	3.53e-16	2.27078	Up	7.36e-05	0.00124559	-5.89077	--	1.34e-05	0.000236496	-0.952171	--	0.56401	0.800477	Similar to Peroxidase 1.
Os09g0501100	3.12667	0.193333	1.19	0.01	0.34	-4.01546	Down	7.55e-11	1.81e-09	2.6218	Up	0.00151444	0.014311	-4.27302	--	0.0269729	0.108079	0.814444	--	0.711719	0.883895	Protein of unknown function DUF568 domain containing protein.
Os08g0137400	3.33	0.206667	1.30333	0.0333333	0.01	-4.01014	Down	1.42e-07	1.84e-06	2.65683	Up	0.00602169	0.0417175	-2.63227	--	0.288097	0.524092	-4.36923	--	0.0806371	0.266487	Cupredoxin domain containing protein.
MSTRG.1383	1.9	0.12	1.05667	0.01	0.01	-3.98489	Down	1.79e-09	3.37e-08	3.13841	Up	0.000284999	0.00378987	-3.58496	--	0.0552093	1	-3.58496	--	0.0318966	0.140928	PREDICTED: peroxidase 2-like [Oryza sativa Japonica Group]
Os05g0525400	2.74	0.173333	1.19667	0.01	0.0133333	-3.98255	Down	1.72e-09	3.25e-08	2.7874	Up	1.7e-05	0.000363775	-4.11548	--	0.0136113	0.0659644	-3.70044	--	0.0348413	0.15055	Malectin-like carbohydrate-binding domain domain containing protein.
Os12g0163700	8.23333	0.523333	2.17	0.01	0.14	-3.97567	Down	1.26e-14	5.22e-13	2.05189	Up	0.00288318	0.023781	-5.70966	--	2.95e-05	0.000463088	-1.9023	--	0.133755	0.366507	Similar to Actin 7 (Actin 2).
Os06g0212300	0.933333	0.0666667	0.61	0.01	0.0533333	-3.80735	Down	3.03e-06	2.88e-05	3.19377	Up	0.000498406	0.00593722	-2.73697	--	0.202934	1	-0.321928	--	0.900856	0.965294	Similar to glycosyltransferase family-37.
Os04g0552200	13.6667	1.04	4.53667	0.01	0.113333	-3.71601	Down	0.000318379	0.00174949	2.12505	Up	0.00690091	0.0462526	-6.70044	--	1.34e-05	0.000236879	-3.19794	--	0.0513747	0.197557	Beta-expansin 5.
Os01g0863800	0.453333	0.0366667	0.56	0.01	0.01	-3.62803	Down	0.00519451	0.0190444	3.93289	Up	0.00587984	0.0409635	-1.87447	--	0.533194	1	-1.87447	--	0.468962	1	Protein of unknown function DUF623 plant domain containing protein.
Os03g0234900	27.47	2.63	11.9133	0.01	0.0566667	-3.38472	Down	0.000166017	0.000988058	2.17944	Up	0.00311584	0.0252937	-8.03892	--	2.86e-09	1.27e-07	-5.53642	--	3e-07	9.1e-06	Similar to Peroxidase (EC 1.11.1.7).
Os09g0345300	1.72667	0.17	0.673333	0.0433333	0.01	-3.34438	Down	4.8e-10	1e-08	1.98579	Up	0.0023451	0.0202223	-1.97199	--	0.22048	0.445763	-4.08746	--	2.87e-05	0.000494195	Similar to Receptor-like serine/threonine kinase.
Os12g0184300	0.796667	0.09	0.88	0.01	0.0766667	-3.14598	Down	0.00530606	0.0193748	3.28951	Up	0.00468323	0.0344061	-3.16993	--	0.453291	1	-0.231326	--	0.925455	1	Conserved hypothetical protein.
Os04g0685000	0.573333	0.0766667	1.89	0.0433333	0.01	-2.9027	Down	0.00347156	0.0135553	4.62364	Up	1.02e-07	4.27e-06	-0.823122	--	0.74978	1	-2.9386	--	0.255318	1	Protein of unknown function DUF623 plant domain containing protein.
Os11g0278300	4.09333	0.606667	2.67667	0.01	0.05	-2.7543	Down	2.25e-09	4.15e-08	2.14146	Up	0.000421682	0.00519702	-5.92283	--	5.98e-06	0.000116893	-3.6009	--	0.000893275	0.0089295	Hypothetical conserved gene.
Os05g0435800	7.46333	1.23	3.94667	0.01	0.136667	-2.60116	Down	1.98e-07	2.49e-06	1.68198	Up	0.00285141	0.0235975	-6.94251	--	1.84e-10	1.02e-08	-3.16993	--	0.00440634	0.0319335	Similar to Subtilisin-like protease.
Os11g0275800	0.763333	0.136667	0.823333	0.01	0.223333	-2.48165	Down	0.00363944	0.0141056	2.59082	Up	0.000594549	0.00683524	-3.77259	--	0.0782433	1	0.708537	--	0.667343	0.862284	Crotonase core domain containing protein.
Os03g0171300	4.37333	0.816667	4.12333	0.01	0.25	-2.42091	Down	0.00362245	0.0140637	2.33599	Up	0.00389959	0.0298878	-6.35168	--	2.05e-05	0.000338651	-1.70782	--	0.334175	0.623294	Similar to DNA-binding protein-like.
Os06g0290701	5.33333	1	5.10333	0.23	0.01	-2.41504	Down	2.19e-07	2.73e-06	2.35144	Up	1.47e-06	4.52e-05	-2.12029	--	0.0904384	0.251224	-6.64386	--	2.1e-05	0.000378191	Hypothetical protein.
Os04g0319800	0.576667	0.11	2.20333	0.01	0.26	-2.39023	Down	0.0150759	0.0459584	4.32411	Up	2.12e-08	1.06e-06	-3.45943	--	0.0266206	0.106915	1.24101	--	0.452401	0.724603	Similar to Cytokinin-O-glucosyltransferase 2 (EC 2.4.1.-) (Zeatin O- glucosyltransferase 2).
Os10g0530600	3.21667	1.35667	4.84333	0.01	0.163333	-1.2455	Down	0.0138775	0.0429494	1.83593	Up	0.000162968	0.00238336	-7.08392	--	1.88e-07	5.55e-06	-3.05418	--	0.00278986	0.0223604	Similar to Glutathione S-transferase GST 20 (EC 2.5.1.18).
Os04g0554600	39.1633	0.01	5.38667	0.01	0.01	-11.9353	Down	1.11e-23	1.08e-21	9.07325	Up	6.72e-11	5.85e-09	0	--	1	1	0	--	1	1	Similar to RCc3 protein.
Os12g0614201	7.64333	0.01	1.49667	0.01	0.01	-9.57806	Down	2.53e-19	1.74e-17	7.22561	Up	1.49e-09	1.02e-07	0	--	1	1	0	--	1	1	Conserved hypothetical protein.
Os12g0614200	5.06667	0.01	1.63667	0.01	0.01	-8.98489	Down	1.15e-16	6.02e-15	7.35462	Up	4.22e-09	2.55e-07	0	--	1	1	0	--	1	1	Similar to Lipase family protein.
MSTRG.8172	2.44667	0.01	0.406667	0.0166667	0.01	-7.93467	Down	1.84e-14	7.45e-13	5.34577	Up	7.89e-06	0.000190147	0.736966	--	0.547498	1	0	--	1	1	--
Os08g0533900	2.17333	0.01	0.366667	0.0466667	0.12	-7.76377	Down	2.28e-13	7.95e-12	5.1964	Up	2.04e-05	0.000426035	2.22239	--	0.342101	1	3.58496	--	0.0948604	0.29524	Hypothetical conserved gene.
Os05g0324400	1.27	0.01	1.13333	0.51	0.156667	-6.98868	Down	9.42e-13	3.02e-11	6.82443	Up	2.06e-12	2.26e-10	5.67243	--	0.040452	0.144269	3.96963	--	0.0683393	0.237982	Hypothetical protein.
Os11g0210100	1.56	0.01	0.63	0.01	0.0133333	-7.2854	Down	3.12e-12	9.21e-11	5.97728	Up	1.87e-08	9.52e-07	0	--	1	1	0.415037	--	0.560968	1	Similar to Class III peroxidase 133.
Os05g0433800	3.36333	0.01	1.34333	0.01	0.323333	-8.39375	Down	5.76e-11	1.41e-09	7.06967	Up	5.2e-06	0.000134407	0	--	1	1	5.01495	--	0.106645	0.317792	Protein of unknown function DUF1218 domain containing protein.
Os12g0614100	1.64	0.01	0.213333	0.01	0.01	-7.35755	Down	1.01e-10	2.36e-09	4.41504	Up	0.00145744	0.0138781	0	--	1	1	0	--	1	1	Similar to Lipase family protein.
Os04g0400600	1.48	0.01	0.616667	0.02	0.01	-7.20945	Down	2.53e-09	4.59e-08	5.94642	Up	1.82e-05	0.000385778	1	--	0.634958	1	0	--	1	1	Similar to OSIGBa0113L04.4 protein.
MSTRG.33259	1.37	0.01	1.08	0.01	0.01	-7.09803	Down	9.44e-08	1.26e-06	6.75489	Up	3.42e-06	9.36e-05	0	--	1	1	0	--	1	1	--
Os01g0545500	0.406667	0.01	0.346667	0.01	0.01	-5.34577	Down	1.35e-07	1.76e-06	5.11548	Up	2.93e-05	0.000576296	0	--	1	1	0	--	0.560968	1	Hypothetical conserved gene.
Os09g0518332	0.643333	0.01	0.51	0.0133333	0.14	-6.00749	Down	3.89e-07	4.58e-06	5.67243	Up	1.7e-05	0.000364087	0.415037	--	0.634958	1	3.80735	--	0.170001	0.42334	Hypothetical protein.
Os02g0131500	0.456667	0.01	0.14	0.01	0.01	-5.51307	Down	4.29e-07	4.98e-06	3.80735	Up	0.00673006	0.0453846	0	--	1	1	0	--	1	1	Hypothetical protein.
Os01g0122367	0.716667	0.01	0.303333	0.0766667	0.0666667	-6.16323	Down	5.82e-07	6.57e-06	4.92283	Up	0.00141835	0.0136235	2.9386	--	0.290044	1	2.73697	--	0.331156	1	Hypothetical protein.
Os05g0280600	0.98	0.01	0.683333	0.3	0.466667	-6.61471	Down	8.45e-07	9.17e-06	6.09452	Up	1.29e-05	0.000290602	4.90689	--	0.0331858	0.125666	5.54432	--	0.0147711	0.0806056	Hypothetical protein.
Os09g0348600	0.353333	0.01	0.24	0.01	0.01	-5.14296	Down	1.74e-06	1.75e-05	4.58496	Up	0.00281231	0.0233583	0	--	1	1	0	--	1	1	Protein kinase catalytic domain domain containing protein.
Os03g0861300	0.556667	0.01	0.266667	0.0166667	0.01	-5.79874	Down	1.37e-05	0.000108704	4.73697	Up	0.000607785	0.00694451	0.736966	--	0.634958	1	0	--	1	1	Similar to Aquaporin.
Os10g0174751	0.253333	0.01	0.166667	0.01	0.01	-4.66297	Down	1.49e-05	0.000117632	4.05889	Up	0.000323989	0.00420566	0	--	1	1	0	--	0.550653	1	Hypothetical protein.
Os12g0164600	0.27	0.01	0.286667	0.193333	0.0366667	-4.75489	Down	3.61e-05	0.000257969	4.8413	Up	0.00227488	0.0197369	4.27302	--	0.0815579	0.234206	1.87447	--	0.356637	1	Protein of unknown function DUF793 family protein.
Os10g0110425	0.38	0.01	0.38	0.05	0.0266667	-5.24793	Down	4.01e-05	0.000283392	5.24793	Up	6.69e-05	0.00115244	2.32193	--	0.357242	1	1.41504	--	0.483629	1	Hypothetical protein.
Os01g0147800	0.21	0.01	0.18	0.02	0.0233333	-4.39232	Down	0.000129929	0.000795051	4.16993	Up	0.000390067	0.0048842	1	--	0.449611	1	1.22239	--	0.420471	1	Domain of unknown function DUF547 domain containing protein.
Os08g0468901	0.216667	0.01	0.146667	0.07	0.0133333	-4.43741	Down	0.000468017	0.00245078	3.87447	Up	0.00713467	0.0472738	2.80735	--	0.276343	1	0.415037	--	0.66628	1	Hypothetical protein.
Os03g0162300	0.263333	0.01	0.323333	0.01	0.0766667	-4.71882	Down	0.00414444	0.0157667	5.01495	Up	0.000906161	0.00957823	0	--	1	1	2.9386	--	0.343392	1	Conserved hypothetical protein.
Os02g0164400	0.356667	0.01	0.7	0.0433333	0.146667	-5.1565	Down	0.00865037	0.0291122	6.12928	Up	0.00338094	0.0268742	2.11548	--	0.549216	1	3.87447	--	0.266547	1	Hypothetical conserved gene.
Os04g0618800	0.0933333	0.01	0.14	0.06	0.08	-3.22239	Down	0.0107351	0.034847	3.80735	Up	0.0025776	0.0217732	2.58496	--	0.173675	0.383752	3	--	0.133313	0.365827	Hypothetical protein.
