# Supplementary material for: Local and Systemic Response to Heterogeneous Sulfate Resupply after Sulfur Deficiency in Rice
Source: Int J Mol Sci. 2022 May 31;23(11):6203. doi: 10.3390/ijms23116203 (PMC9181796; doi:10.3390/ijms23116203)
Supplement: Supplementary file 1 [file ijms-23-06203-s001.zip › Table S6.xlsx]

## Sheet: Percentage of each Gene set
Table S6. Percentage of local responese genes, systemic response genes, simultaneous local and systemic response genes, and non response genes to sulfate resupply after S deficiency.
Gene set	Expression pattern under S deficiency	Gene mode	Gene number	Total expression recovered gene number	Percentage
A	Up-regulated	Response to homogeneous sulfate resupply	129	219	0.589041
B	Up-regulated	Response to heterogeneous sulfate resupply	90	219	0.410959
C	Down-regulated	No response to homogeneous sulfate resupply	101	213	0.474178
D	Down-regulated	No response to heterogeneous sulfate resupply	112	213	0.525822

## Sheet: Gene set A
Table S6. Shoot up-regulated DEGs with expressions recovered by homogeneous sulfate resupply
Gene ID	CK_Sh_mean	S0_Sh_mean	SR_Sh_mean	SP_Sh_mean	Log2 (S0/CK)	Up/Down (S0/CK)	P_Value (S0/CK)	FDR (S0/CK)	Log2 (SR/S0)	Up/Down (SR/S0)	P_Value (SR/S0)	FDR (SR/S0)	Log2 (SP/S0)	Up/Down (SP/S0)	P_Value (SP/S0)	FDR (SP/S0)	Annotation
Os03g0807600	0.01	0.353333	0.00666667	0.03	5.14296	Up	0.000155831	0.00160841	-5.72792	Down	0.000226648	0.00102635	-3.558	Down	0.00498892	0.0154195	Similar to Cyclopropane-fatty-acyl-phospholipid synthase family protein expressed.
Os04g0206650	0.01	0.503333	0.0133333	0.0666667	5.65344	Up	4.12e-07	9.56e-06	-5.2384	Down	4.54e-06	2.79e-05	-2.91648	Down	0.00100605	0.00375219	Hypothetical protein.
MSTRG.5654	0.01	0.35	0.01	0.00333333	5.12928	Up	4.89e-10	2.2e-08	-5.12928	Down	5.71e-11	6.3e-10	-6.71425	Down	2.15e-09	2.09e-08	--
Os07g0251301	0.01	0.953333	0.01	0.01	6.57491	Up	0.000421426	0.00368766	-6.57491	Down	0.000102967	0.000498024	-6.57491	Down	0.000123765	0.000568276	Similar to Ribosomal phosphoprotein P0.
Os09g0452700	0.476667	185.007	2.56333	1.51	8.60038	Up	2.56e-127	2.53e-123	-6.17341	Down	4.13e-14	5.87e-13	-6.93688	Down	1.01e-46	7.14e-45	Ubiquitin fusion protein.
Os09g0483200	0.193333	68.18	0.633333	0.866667	8.46211	Up	4.17e-15	3.96e-13	-6.75024	Down	1.75e-06	1.15e-05	-6.29773	Down	2.65e-18	5.59e-17	Similar to Ubiquitin/ribosomal fusion protein (Fragment).
Os07g0625500	0.0266667	7.42	0.373333	0.1	8.12024	Up	1.85e-13	1.44e-11	-4.31288	Down	3.65e-12	4.49e-11	-6.21335	Down	7.54e-20	1.74e-18	Similar to Fimbriata-associated protein (Fragment).
Os07g0625600	0.113333	18.3767	0.496667	0.526667	7.34116	Up	4.04e-07	9.42e-06	-5.20945	Down	7.46e-37	3e-35	-5.12484	Down	2.1e-33	9.48e-32	Fimbriata-associated protein (Fragment).
MSTRG.21891	0.0233333	2.77667	0.443333	0.46	6.89482	Up	9.88e-24	2.33e-21	-2.64689	Down	4.52e-11	5.06e-10	-2.59365	Down	1.7e-17	3.39e-16	--
Os09g0483400	12.37	1263.47	101.377	30.5433	6.6744	Up	0	0	-3.63959	Down	4e-39	1.73e-37	-5.37039	Down	3.52e-217	8.79e-214	Similar to Ubiquitin/ribosomal fusion protein (Fragment).
Os07g0218200	0.14	12.6667	3.61667	3.62667	6.49947	Up	1.73e-15	1.71e-13	-1.8083	Down	0.014109	0.0401402	-1.80432	Down	0.00356083	0.0115217	Similar to terpene synthase 7.
Os10g0386300	0.796667	68.64	3.35333	1.67333	6.42893	Up	1.36e-30	5.6e-28	-4.35538	Down	9.43e-13	1.21e-11	-5.35825	Down	1.52e-20	3.67e-19	Hypothetical protein.
Os03g0259500	1.87333	155.877	3.91	1.77667	6.37865	Up	8.43e-99	3.57e-95	-5.31709	Down	7.24e-18	1.35e-16	-6.45509	Down	3.83e-90	9e-88	Similar to Ubiquitin.
Os04g0204100	0.21	14.46	0.456667	0.38	6.10553	Up	7.21e-16	7.43e-14	-4.98478	Down	9.6e-40	4.2e-38	-5.24992	Down	1.35e-14	2.2e-13	Similar to H0825G02.3 protein.
Os01g0280500	0.303333	20.2567	1.47	1.05333	6.06135	Up	3.02e-71	5.96e-68	-3.78451	Down	2.59e-31	8.75e-30	-4.26536	Down	1.34e-36	6.84e-35	Similar to Eukaryotic translation initiation factor 6 (eIF-6) (B4 integrin interactor) (CAB) (p27(BBP)) (B(2)GCN homolog).
Os01g0723000	0.403333	26.66	0.733333	0.53	6.04656	Up	1.13e-12	7.82e-11	-5.18406	Down	1.17e-16	2.02e-15	-5.65254	Down	1.03e-17	2.08e-16	Similar to Elongation factor EF-2 (Fragment).
Os02g0491300	0.01	0.573333	0.04	0.0366667	5.8413	Up	1.51e-06	2.98e-05	-3.8413	Down	8.76e-06	5.17e-05	-3.96683	Down	8.92e-07	5.98e-06	Secretory fasciclin glycoprotein Regulation of anther development and pollen formation
Os09g0483300	0.173333	9.91667	0.866667	0.173333	5.83823	Up	2.12e-35	1.19e-32	-3.51631	Down	1.6e-12	2.02e-11	-5.83823	Down	4.9e-42	3.05e-40	EF hand domain containing protein.
Os04g0204150	0.166667	8.61	0.243333	0.113333	5.69098	Up	5.16e-06	8.61e-05	-5.14501	Down	4.44e-34	1.64e-32	-6.24737	Down	1.2e-11	1.48e-10	Hypothetical protein.
Os09g0344400	0.0533333	2.44333	0.306667	0.09	5.51767	Up	2.95e-20	4.94e-18	-2.99411	Down	6.87e-16	1.12e-14	-4.76278	Down	2e-18	4.24e-17	F-box domain cyclin-like domain containing protein.
Os04g0206600	0.396667	18.1433	0.613333	1.66667	5.51537	Up	2.76e-52	2.93e-49	-4.88662	Down	9.47e-36	3.68e-34	-3.4444	Down	1.89e-29	7.14e-28	UDP-glucuronosyl/UDP-glucosyltransferase family protein.
Os01g0653500	0.0166667	0.72	0.11	0.05	5.43296	Up	5.61e-06	9.28e-05	-2.71049	Down	0.00100489	0.00391845	-3.848	Down	4.51e-06	2.68e-05	Conserved hypothetical protein.
Os07g0440900	0.0433333	1.85333	0.11	0.0566667	5.4185	Up	8.81e-33	4.28e-30	-4.07455	Down	1.06e-36	4.24e-35	-5.03148	Down	8.12e-37	4.19e-35	Conserved hypothetical protein.
Os02g0179600	1.19667	48.9567	3.17333	1.85	5.35441	Up	6.64e-89	1.79e-85	-3.94743	Down	5.96e-43	2.94e-41	-4.72591	Down	2.7e-85	5.54e-83	Uncharacterized conserved protein UCP015417 vWA domain containing protein.
Os04g0659200	0.0933333	3.13	0.333333	0.15	5.06763	Up	1.28e-28	4.46e-26	-3.23113	Down	1.85e-25	5.07e-24	-4.38313	Down	1.39e-31	5.77e-30	Hypothetical protein.
Os02g0720400	0.186667	5.44667	0.663333	1.19	4.86684	Up	5.15e-18	6.64e-16	-3.03757	Down	6.86e-11	7.5e-10	-2.19441	Down	1.93e-09	1.89e-08	Protein of unknown function DUF506 plant domain containing protein.
Os03g0165900	0.99	27.1467	10.7733	11.3033	4.7772	Up	3.09e-63	4.58e-60	-1.33331	Down	5.19e-13	6.78e-12	-1.26403	Down	8.73e-11	9.88e-10	Tetratricopeptide-like helical domain containing protein.
Os12g0191601	0.386667	9.79667	1.13333	0.923333	4.66313	Up	6.32e-13	4.58e-11	-3.11172	Down	1.5e-08	1.29e-07	-3.40737	Down	6.7e-15	1.12e-13	Conserved hypothetical protein.
MSTRG.19551	0.156667	3.56667	0.213333	0.583333	4.50881	Up	1.33e-15	1.33e-13	-4.0634	Down	9.65e-19	1.91e-17	-2.61218	Down	4.56e-09	4.25e-08	--
Os10g0400500	0.14	3.11	0.283333	0.106667	4.47342	Up	2.86e-24	7.25e-22	-3.45634	Down	2.12e-06	1.37e-05	-4.86573	Down	4.63e-33	2.07e-31	Similar to Pyridoxal-dependent decarboxylase conserved domain containing protein expressed.
Os09g0342000	0.15	3.06	0.32	0.16	4.3505	Up	2.05e-22	4.25e-20	-3.25739	Down	4.15e-18	7.86e-17	-4.25739	Down	4.24e-21	1.05e-19	Cyclin-like F-box domain containing protein.
Os01g0510200	10.3133	199.68	7.52667	5.54333	4.27511	Up	4.27e-58	5.5e-55	-4.72953	Down	2.08e-53	1.38e-51	-5.17079	Down	6.22e-79	1.11e-76	Conserved hypothetical protein.
Os08g0155550	0.0366667	0.666667	0.0866667	0.0433333	4.18442	Up	0.00409552	0.0241722	-2.94342	Down	0.0131316	0.03768	-3.94342	Down	0.000945322	0.00355347	Hypothetical protein.
Os12g0639400	0.0233333	0.41	0.143333	0.11	4.13516	Up	6.08e-05	0.000719489	-1.51625	Down	0.007779	0.0239882	-1.89812	Down	0.00722285	0.021319	ATPase AAA-type core domain containing protein.
Os01g0714800	0.146667	2.55333	0.253333	0.31	4.12177	Up	3.75e-07	8.84e-06	-3.33327	Down	8.36e-07	5.75e-06	-3.04204	Down	7.96e-06	4.56e-05	WRKY transcription factor 26.
Os01g0947000	1.94333	30.87	7.97333	2.18667	3.9896	Up	2.95e-76	6.72e-73	-1.95295	Down	2.41e-11	2.75e-10	-3.8194	Down	3.38e-30	1.33e-28	Similar to Beta-1 3-glucanase precursor.
Os04g0627900	1.06667	16.7333	1	1.89	3.97154	Up	1.33e-06	2.67e-05	-4.06465	Down	7.7e-18	1.43e-16	-3.14627	Down	1.46e-12	1.98e-11	Translation initiation factor SUI1 domain containing protein.
Os05g0395400	3.38667	45.04	6.39333	4.40667	3.73327	Up	7.53e-58	9.31e-55	-2.81657	Down	3.58e-38	1.5e-36	-3.35345	Down	1.03e-65	1.37e-63	Hypothetical protein.
Os07g0605800	2.43667	31.7433	5.7	3.71	3.70347	Up	8e-96	2.64e-92	-2.47742	Down	2.75e-71	2.7e-69	-3.09696	Down	9.61e-99	2.89e-96	Similar to STF-1 (Fragment).
MSTRG.19004	0.03	0.346667	0.156667	0.133333	3.53051	Up	0.000173881	0.00176705	-1.14585	Down	0.0162215	0.0453177	-1.37851	Down	0.00636438	0.0191032	--
Os02g0183900	0.333333	3.42	0.383333	0.233333	3.35896	Up	2.39e-49	2.15e-46	-3.15732	Down	1.02e-33	3.74e-32	-3.87353	Down	2.58e-63	3.14e-61	Similar to Isoleucine-tRNA ligase-like protein.
Os01g0106400	65.2167	659.197	161.883	120.403	3.3374	Up	1.65e-62	2.34e-59	-2.02575	Down	1.05e-38	4.47e-37	-2.45283	Down	1.57e-54	1.44e-52	Similar to Isoflavone reductase homolog IRL (EC 1.3.1.-).
Os03g0797500	5.68667	55.9633	6.36667	3.72	3.29883	Up	6.61e-43	5.3e-40	-3.13587	Down	4.59e-08	3.72e-07	-3.91111	Down	1.71e-98	5.08e-96	Similar to Indole-3-glycerol phosphate lyase (Fragment).
Os03g0724600	1.12667	9.83333	2.08	2.39667	3.12562	Up	7.55e-19	1.06e-16	-2.2411	Down	1.48e-15	2.34e-14	-2.03665	Down	5.25e-12	6.73e-11	Conserved hypothetical protein.
Os02g0129800	10.0733	84.3433	21.2067	27.54	3.06573	Up	2.25e-22	4.63e-20	-1.99176	Down	8.3e-11	9.01e-10	-1.61475	Down	5.38e-11	6.2e-10	Conserved hypothetical protein.
MSTRG.28235	0.316667	2.54333	0.923333	0.83	3.00568	Up	0.000312683	0.00288954	-1.4618	Down	0.00185499	0.0067812	-1.61554	Down	0.00246593	0.00834774	--
Os10g0506200	0.823333	6.08667	1.77333	1.26	2.8861	Up	6.43e-30	2.48e-27	-1.77919	Down	2.48e-22	5.88e-21	-2.27223	Down	4.37e-24	1.28e-22	Similar to Valyl-tRNA synthetase.
Os01g0155000	0.623333	4.49	2.08667	1.21	2.84864	Up	4.83e-15	4.56e-13	-1.10552	Down	0.000126321	0.000599653	-1.89171	Down	2.51e-08	2.13e-07	Alpha/beta hydrolase fold-3 domain containing protein.
Os04g0206500	1.54667	10.8433	1.28667	2.01667	2.80957	Up	1.88e-19	2.82e-17	-3.0751	Down	1.03e-61	8.37e-60	-2.42676	Down	9.55e-30	3.68e-28	UDP-glucuronosyl/UDP-glucosyltransferase family protein.
Os03g0338000	6.56333	44.75	13.3333	8.18	2.76939	Up	7.74e-54	8.5e-51	-1.74685	Down	5.08e-21	1.13e-19	-2.45171	Down	3.05e-41	1.84e-39	Similar to alanine--glyoxylate aminotransferase 2.
Os09g0324400	0.346667	2.35	0.53	0.476667	2.76104	Up	2.53e-07	6.27e-06	-2.1486	Down	1.3e-07	9.91e-07	-2.30161	Down	3.12e-09	2.97e-08	Cyclin-like F-box domain containing protein.
Os05g0282900	0.123333	0.816667	0.19	0.316667	2.72718	Up	9.66e-07	2.02e-05	-2.10375	Down	0.0155339	0.0436502	-1.36678	Down	0.00104408	0.00387798	Conserved hypothetical protein.
Os03g0145600	0.326667	2.10333	0.626667	0.473333	2.68679	Up	4.9e-11	2.63e-09	-1.74691	Down	2.79e-06	1.78e-05	-2.15175	Down	4.67e-08	3.8e-07	WD40/YVTN repeat-like domain containing protein.
Os03g0757600	2.67	17.0433	3.9	3.83333	2.6743	Up	8.29e-58	9.84e-55	-2.12766	Down	2.31e-36	9.13e-35	-2.15254	Down	1.44e-53	1.28e-51	UDP-glucuronosyl/UDP-glucosyltransferase family protein.
Os01g0696701	0.123333	0.76	0.22	0.2	2.62344	Up	0.00168434	0.0117122	-1.7885	Down	0.00287591	0.0100439	-1.926	Down	0.0159481	0.0424011	Hypothetical protein.
Os04g0206450	0.403333	2.40333	0.48	0.26	2.57499	Up	7.16e-13	5.1e-11	-2.32393	Down	3.81e-08	3.13e-07	-3.20845	Down	8.09e-06	4.62e-05	Similar to cDNA clone:002-100-D12 full insert sequence.
Os06g0697500	0.74	4.39667	1.53	1.24	2.57081	Up	1.63e-09	6.56e-08	-1.52288	Down	2.1e-12	2.63e-11	-1.82607	Down	3.92e-12	5.1e-11	ATPase AAA-type core domain containing protein.
Os09g0498500	10.2667	58.7167	19.5933	12.28	2.5158	Up	1.49e-06	2.95e-05	-1.58341	Down	7.05e-07	4.9e-06	-2.25746	Down	4.64e-05	0.000231869	NAD-binding site containing protein.
Os01g0373700	0.756667	4.28333	1.50667	0.566667	2.501	Up	1.34e-09	5.52e-08	-1.50737	Down	0.00176412	0.0064781	-2.91816	Down	4.37e-09	4.09e-08	Conserved hypothetical protein.
Os06g0592500	17.36	95.9033	1.96333	11.0933	2.46581	Up	0.000264974	0.0025212	-5.6102	Down	1.18e-15	1.89e-14	-3.11189	Down	0.000173381	0.000772687	Similar to Ethylene-responsive transcriptional coactivator.
Os05g0276500	0.403333	2.16333	0.723333	0.34	2.42321	Up	0.000167701	0.00171128	-1.58052	Down	0.0122465	0.0354868	-2.66965	Down	5.44e-05	0.00026766	Expansin Os-EXPA3.
Os09g0324300	0.113333	0.593333	0.0433333	0.0366667	2.38827	Up	0.00162233	0.0113636	-3.77529	Down	1.76e-05	9.85e-05	-4.0163	Down	7.32e-06	4.22e-05	Cyclin-like F-box domain containing protein.
Os02g0102300	10.84	56.48	19.6067	14.02	2.38138	Up	5.57e-29	1.99e-26	-1.5264	Down	2.02e-19	4.16e-18	-2.01025	Down	7.46e-25	2.28e-23	Arsenate reductase Sulfurtransferase/rhodanese-like protein Regulation of arsenic accumulation
Os05g0588900	2.59667	13.0433	1.61	3.43	2.32858	Up	7.67e-22	1.48e-19	-3.01818	Down	1.1e-27	3.3e-26	-1.92703	Down	1.23e-13	1.84e-12	Similar to mitochondrial chaperone BCS1.
Os03g0283100	54.2167	265.567	103.473	109.357	2.29227	Up	9.63e-145	1.43e-140	-1.35982	Down	4.95e-85	5.95e-83	-1.28003	Down	3.16e-63	3.82e-61	Similar to In2-1 protein.
MSTRG.17585	0.36	1.75	0.843333	0.713333	2.28129	Up	0.000405398	0.00358015	-1.05318	Down	0.0133003	0.0381023	-1.29471	Down	0.00638918	0.0191687	--
Os03g0618300	26.8967	128.957	35.0333	49.3867	2.26139	Up	2.94e-32	1.36e-29	-1.88009	Down	1.11e-23	2.8e-22	-1.38469	Down	3.23e-16	5.93e-15	Isopenicillin N synthase family protein.
Os04g0399800	0.15	0.716667	0.0266667	0.05	2.25634	Up	0.0027506	0.0174682	-4.74819	Down	1.15e-06	7.76e-06	-3.8413	Down	1.79e-05	9.6e-05	Similar to Ethylene-responsive transcription factor 12 (Ethylene-responsive element binding factor 12) (EREBP-12) (AtERF12).
Os02g0467600	0.54	2.34667	1	1.15	2.11958	Up	4.73e-07	1.08e-05	-1.23061	Down	9.34e-05	0.000455326	-1.02898	Down	0.00067731	0.0026358	Similar to Cinnamate 4-hydroxylase CYP73.
Os04g0203600	0.143333	0.62	0.206667	0.226667	2.11289	Up	0.00315287	0.0195217	-1.58496	Down	0.00999042	0.0297893	-1.4517	Down	0.00832709	0.0241256	Similar to cDNA clone:002-100-D12 full insert sequence.
Os03g0797300	3.87667	15.6333	1.22333	0.31	2.01174	Up	7.83e-15	7.19e-13	-3.67574	Down	3.4e-25	9.19e-24	-5.65621	Down	1.25e-50	1.01e-48	Similar to benzoxazinless1.
Os01g0695800	7.26	29.1333	10.67	6.64	2.00463	Up	3.91e-38	2.64e-35	-1.44911	Down	6.06e-12	7.31e-11	-2.13342	Down	1.42e-41	8.74e-40	Similar to MDR-like ABC transporter.
Os10g0400100	17.28	68.0733	30.3167	21.8	1.97799	Up	1.51e-124	1.12e-120	-1.16698	Down	2.2e-43	1.1e-41	-1.64276	Down	1.18e-93	3.09e-91	Methionyl-tRNA synthetase class Ia domain containing protein.
Os12g0111800	0.273333	1.07667	0.46	0.266667	1.97784	Up	0.00856985	0.0433742	-1.22687	Down	0.0133267	0.0381743	-2.01346	Down	0.00172836	0.00607661	Similar to Class III peroxidase 136.
Os07g0543100	6.92	27.2533	1.08	3.26	1.97759	Up	4.12e-50	3.82e-47	-4.65733	Down	4.39e-48	2.53e-46	-3.06349	Down	3.83e-64	4.8e-62	Similar to Beta-amylase (EC 3.2.1.2).
Os02g0772000	0.21	0.816667	0.226667	0.296667	1.95936	Up	1.41e-05	0.000205426	-1.84918	Down	6.26e-07	4.38e-06	-1.4609	Down	3e-06	1.84e-05	Similar to global transcription factor group.
Os05g0515900	0.816667	3.11667	1.51667	1.47667	1.93218	Up	2.04e-07	5.15e-06	-1.0391	Down	0.000135077	0.000637217	-1.07766	Down	6.79e-05	0.000328247	Similar to heat- and acid-stable phosphoprotein.
Os01g0793300	6.17	22.6667	6.44	3.29	1.87723	Up	1.95e-25	5.6e-23	-1.81544	Down	0.00457329	0.0150874	-2.78441	Down	1.21e-28	4.38e-27	Di-copper centre-containing domain containing protein.
Os02g0686100	0.296667	1.06	0.426667	0.333333	1.83715	Up	0.00577145	0.0317515	-1.31288	Down	0.0103733	0.0307637	-1.66903	Down	0.00584556	0.0177329	Similar to RING-H2 finger protein ATL1B.
Os01g0627800	2.38333	8.17667	0.5	0.78	1.77853	Up	2.98e-09	1.13e-07	-4.03151	Down	1.26e-37	5.17e-36	-3.38997	Down	4.31e-33	1.93e-31	Similar to Cytochrome P450 monooxygenase CYP72A5 (Fragment).
Os07g0656600	1.81333	5.87	1.10333	1.30667	1.69472	Up	2.91e-11	1.63e-09	-2.41149	Down	3.83e-17	6.8e-16	-2.16747	Down	1.43e-17	2.89e-16	Uncharacterised conserved protein UCP022348 domain containing protein.
Os04g0521100	1.37	4.33667	0.31	0.166667	1.66241	Up	2.69e-05	0.000358026	-3.80625	Down	7.56e-10	7.5e-09	-4.70155	Down	2.41e-23	6.76e-22	Major intrinsic protein family protein.
Os06g0185500	1.11333	3.46	1.38	0.95	1.63589	Up	0.000323191	0.00297645	-1.3261	Down	0.000340311	0.00148188	-1.86477	Down	1.5e-05	8.14e-05	Transferase family protein.
Os02g0259850	2.82333	8.73667	0.793333	3.18	1.62968	Up	2.04e-14	1.8e-12	-3.46108	Down	2.16e-43	1.08e-41	-1.45806	Down	4.09e-12	5.32e-11	Hypothetical gene.
Os07g0124400	0.98	3.02667	1.44	0.853333	1.62688	Up	0.000167386	0.00170923	-1.07166	Down	4.19e-05	0.000218414	-1.82655	Down	5.06e-05	0.000250678	Hypothetical conserved gene.
Os04g0578550	4.04	12.32	0.883333	2.97333	1.60858	Up	2.58e-17	3.07e-15	-3.8019	Down	3.83e-60	3.02e-58	-2.05085	Down	4.67e-30	1.82e-28	Hypothetical conserved gene.
MSTRG.13384	0.403333	1.21667	0.573333	0.426667	1.59289	Up	0.000217547	0.00213192	-1.08549	Down	0.0122542	0.0355059	-1.51175	Down	1.57e-06	1.01e-05	--
Os11g0117400	19.57	58.4167	6.47333	6.09	1.57774	Up	9.15e-13	6.45e-11	-3.1738	Down	9.13e-09	8.07e-08	-3.26187	Down	6.62e-71	1.02e-68	Similar to WRKY DNA binding domain containing protein expressed.
Os03g0650200	2.59667	7.71333	1.10667	0.53	1.57069	Up	0.000193129	0.0019296	-2.80113	Down	4.24e-11	4.77e-10	-3.86329	Down	3.93e-20	9.25e-19	Similar to Cytochrome P450 CYP92C5.
Os07g0448200	0.806667	2.33	0.05	0.146667	1.53029	Up	0.00111233	0.00830304	-5.54226	Down	3.07e-11	3.48e-10	-3.98972	Down	2.64e-13	3.84e-12	Similar to cDNA clone:J023132K03 full insert sequence.
Os09g0127300	13.1667	37.7767	11.14	9.50667	1.52061	Up	1.55e-30	6.29e-28	-1.76175	Down	3.39e-33	1.22e-31	-1.99048	Down	1.54e-66	2.12e-64	NAD(P)-binding domain containing protein.
Os09g0309700	9.23	26.24	8.84333	9.49	1.50737	Up	3.35e-25	9.11e-23	-1.56911	Down	3.18e-40	1.44e-38	-1.46729	Down	1.38e-34	6.49e-33	Ethylene response factor Transcription factor Negative regulation of ethylene biosynthesis Drought tolerance
Os08g0288500	12.58	35.5233	15.5133	16.6733	1.49764	Up	3.36e-44	2.84e-41	-1.19526	Down	6.96e-39	2.99e-37	-1.09122	Down	1.14e-32	5.01e-31	Similar to G-patch domain containing protein.
Os09g0545100	1.08667	2.97333	1.16	1.17	1.45217	Up	0.00178765	0.0123294	-1.35796	Down	0.000530629	0.00221145	-1.34557	Down	0.000502469	0.00201783	Hypothetical conserved gene.
Os01g0830900	0.623333	1.68	0	0.17	1.43039	Up	0.00875296	0.0440828	-1.87254	Down	2.02e-10	2.12e-09	-3.30485	Down	3.42e-07	2.46e-06	Hypothetical conserved gene.
Os01g0136200	14.1967	37.9967	3.84	16.6233	1.42032	Up	7.3e-33	3.67e-30	-3.30669	Down	6.47e-121	1.33e-118	-1.19266	Down	1.14e-09	1.14e-08	16.9 kDa class I heat shock protein 1.
Os04g0111200	42.28	145.507	39.7367	39.8	1.78304	Up	2.91e-09	1.11e-07	-1.87254	Down	5.07e-32	1.75e-30	-1.87024	Down	6.39e-39	3.57e-37	Similar to ATP sulfurylase (Fragment)
Os02g0259900	5.81	15.3333	1.38	5.94	1.40006	Up	1.01e-13	8.07e-12	-3.47393	Down	8.31e-110	1.43e-107	-1.36814	Down	3.98e-12	5.18e-11	Conserved hypothetical protein.
Os07g0131001	2.4	6.32667	1.19667	2.34	1.39841	Up	4.31e-08	1.28e-06	-2.40242	Down	1.15e-17	2.11e-16	-1.43494	Down	1.37e-12	1.86e-11	Hypothetical protein.
Os04g0341500	2.99333	7.85667	3.81333	3.43	1.39216	Up	4.46e-07	1.03e-05	-1.04286	Down	0.000141109	0.000662326	-1.19571	Down	9.46e-07	6.31e-06	Similar to OSIGBa0159H11-OSIGBa0137A07.8 protein.
Os07g0509800	117.833	309.13	65.7133	99.71	1.39147	Up	2.22e-14	1.94e-12	-2.23396	Down	1.23e-31	4.19e-30	-1.6324	Down	7.88e-22	2.04e-20	Similar to adenosine 5'-phosphosulfate reductase 2.
Os03g0724700	5.02667	13.1033	3.70667	6.43333	1.38226	Up	4.95e-16	5.17e-14	-1.82174	Down	1.86e-28	5.69e-27	-1.0263	Down	4.99e-10	5.21e-09	Similar to cDNA clone:002-104-C06 full insert sequence.
Os12g0518200	2.44667	6.33667	1.54333	2.69667	1.37291	Up	7.72e-06	0.000121539	-2.03767	Down	9.24e-18	1.71e-16	-1.23255	Down	1.58e-06	1.01e-05	Similar to Integral membrane protein DUF6 containing protein.
Os03g0198200	2.70333	6.73	1.43667	1.03333	1.31587	Up	3.55e-06	6.27e-05	-2.22788	Down	2.1e-14	3.06e-13	-2.7033	Down	5.7e-19	1.26e-17	Hypothetical protein.
Os01g0803300	2.13667	5.31333	0.846667	0.276667	1.31426	Up	1.71e-06	3.32e-05	-2.64975	Down	3.08e-22	7.27e-21	-4.2634	Down	1.72e-30	6.83e-29	Protein of unknown function DUF6 transmembrane domain containing protein.
Os02g0300700	29.99	73.4633	33.01	24.46	1.29254	Up	4.06e-21	7.48e-19	-1.15412	Down	1.26e-17	2.3e-16	-1.5866	Down	1e-37	5.3e-36	Similar to Eukaryotic translation initiation factor 1A (EIF-1A) (EIF-4C).
Os11g0540600	0.27	0.656667	0.0933333	0.0833333	1.2822	Up	0.00773494	0.0399807	-2.8147	Down	0.000452562	0.00191398	-2.9782	Down	0.000101158	0.000473364	Protein of unknown function DUF247 plant family protein.
Os05g0107900	3.21667	7.72667	2.80333	1.76	1.26428	Up	3.07e-06	5.54e-05	-1.4627	Down	8.21e-10	8.11e-09	-2.13427	Down	7.84e-16	1.4e-14	Similar to Protein DEHYDRATION-INDUCED 19 homolog 6.
Os05g0127500	6.55	15.4333	5.16333	4.11667	1.23648	Up	9.82e-09	3.32e-07	-1.57968	Down	2.46e-17	4.43e-16	-1.9065	Down	1.56e-20	3.74e-19	Similar to Leucoanthocyanidin dioxygenase-like protein.
Os04g0516600	35.7633	84.21	18.46	14.7867	1.23551	Up	2.63e-16	2.85e-14	-2.18959	Down	1.93e-53	1.28e-51	-2.50969	Down	1.28e-64	1.65e-62	Pyridoxal phosphate-dependent transferase major region subdomain 1 domain containing protein.
Os10g0344000	3.67333	8.33667	2.50333	3.58333	1.18238	Up	7.24e-06	0.000115104	-1.73562	Down	5.85e-20	1.23e-18	-1.21817	Down	2.02e-08	1.73e-07	Similar to transparent testa 12 protein.
Os10g0154700	9.5	21.5033	6.78333	8.33667	1.17856	Up	1.61e-09	6.5e-08	-1.66449	Down	5.74e-15	8.71e-14	-1.36702	Down	9.53e-22	2.45e-20	Similar to Cyclophilin Dicyp-2.
Os03g0190400	0.806667	1.81667	0.503333	0.383333	1.17125	Up	0.00047906	0.00409889	-1.85171	Down	1.22e-06	8.23e-06	-2.24462	Down	4.55e-07	3.2e-06	Hypothetical gene.
Os04g0372700	15.9467	35.83	9.85	15.1567	1.16791	Up	6.06e-17	7.02e-15	-1.86297	Down	3.8e-40	1.7e-38	-1.24122	Down	2.23e-09	2.16e-08	Similar to Quinone-oxidoreductase QR1 (Fragment).
Os07g0593400	2.05667	4.6	1.64	1.69	1.16133	Up	9.97e-06	0.000152786	-1.48794	Down	7.04e-08	5.56e-07	-1.44461	Down	2.79e-07	2.03e-06	Similar to golgi transport 1 protein B.
Os04g0631600	6.34667	14.1767	6.08333	6.19667	1.15945	Up	9.29e-09	3.16e-07	-1.22058	Down	3.72e-09	3.43e-08	-1.19395	Down	3.9e-11	4.57e-10	Basic helix-loop-helix dimerisation region bHLH domain containing protein.
Os12g0175400	3.56	7.92333	2.21	1.42	1.15423	Up	0.000406812	0.00358748	-1.84206	Down	5.36e-10	5.41e-09	-2.48022	Down	7.45e-17	1.43e-15	Similar to OSMYB2.
Os11g0298000	4.06333	9.03667	1.11667	0.123333	1.15313	Up	0.000564469	0.00471142	-3.01659	Down	1.84e-14	2.68e-13	-6.19516	Down	1.39e-05	7.61e-05	Similar to amino acid transporter.
Os01g0820000	2.65667	5.85667	0.01	0.2	1.14046	Up	3.3e-08	1e-06	-9.19394	Down	1.02e-20	2.23e-19	-4.87201	Down	1.06e-44	7.2e-43	Similar to Cinnamate-4-hydroxylase.
Os03g0348200	97.24	213.21	15.82	6.52333	1.13265	Up	5.94e-35	3.26e-32	-3.75245	Down	3.01e-08	2.5e-07	-5.03052	Down	0	0	Terpene synthase-like domain containing protein.
Os07g0131375	1.24667	2.73333	0.303333	0.366667	1.13259	Up	0.000288969	0.00270393	-3.17169	Down	2.02e-13	2.73e-12	-2.89812	Down	8.96e-21	2.19e-19	Protein kinase catalytic domain domain containing protein.
Os08g0168000	7.1	15.4867	1.84	2.58	1.12514	Up	6.32e-05	0.000741859	-3.07325	Down	0.00209068	0.00754722	-2.58558	Down	1.36e-15	2.38e-14	Similar to Sesquiterpene synthase.
Os04g0111250	1.90333	4.14	1.15	1.07	1.1211	Up	0.00125417	0.00917249	-1.848	Down	1.69e-06	1.12e-05	-1.95202	Down	9.05e-10	9.17e-09	Conserved hypothetical protein.
MSTRG.13241	1.15	2.48667	0.656667	1.11	1.11258	Up	0.00729352	0.0382185	-1.92098	Down	2.34e-06	1.51e-05	-1.16365	Down	0.00273378	0.00913627	--
Os09g0394600	4.08	8.5	1.76	3.52667	1.05889	Up	7.06e-10	3.06e-08	-2.27189	Down	1.95e-40	8.85e-39	-1.26916	Down	1.44e-14	2.33e-13	Endonuclease/exonuclease/phosphatase domain containing protein.
Os01g0954000	53.96	110.327	3.52667	43.7567	1.03182	Up	1.1e-19	1.69e-17	-4.96733	Down	1.06e-306	1.47e-303	-1.33421	Down	1.73e-20	4.14e-19	NADPH-dependent FMN reductase family protein.
Os05g0186300	35.2867	71.3133	8.58667	17.8933	1.01505	Up	1.73e-20	3.02e-18	-3.054	Down	6.19e-58	4.55e-56	-1.99475	Down	9.79e-70	1.45e-67	Similar to NADP-malic enzyme.
Os03g0195475	3.67	7.38333	3.55333	3.53333	1.00849	Up	3.04e-08	9.29e-07	-1.0551	Down	5.78e-11	6.37e-10	-1.06324	Down	1.36e-15	2.38e-14	Hypothetical protein.
Os06g0141700	2.03	4.07	1.97667	1.04667	1.00355	Up	0.00442444	0.0257447	-1.04196	Down	4.82e-05	0.000248418	-1.95923	Down	9.15e-10	9.26e-09	Similar to Early nodulin.

## Sheet: Gene set B
Table S6. Shoot up-regulated DEGs with expressions recovered by heterogeneous sulfate resupply
Gene ID	CK_Sh_mean	S0_Sh_mean	SR_Sh_mean	SP_Sh_mean	Log2 (S0/CK)	Up/Down (S0/CK)	P_Value (S0/CK)	FDR (S0/CK)	Log2 (SR/S0)	Up/Down (SR/S0)	P_Value (SR/S0)	FDR (SR/S0)	Log2 (SP/S0)	Up/Down (SP/S0)	P_Value (SP/S0)	FDR (SP/S0)	Annotation
Os01g0586800	0.01	0.973333	0.126667	3.84333	6.60486	Up	9.86e-07	2.05e-05	-2.9419	Down	0.000596941	0.0024575	1.98135	--	0.00191468	0.00666383	Similar to WRKY transcription factor 5 (Fragment).
MSTRG.30983	0.01	0.68	0.0233333	0.41	6.08746	Up	3.75e-05	0.000476723	-4.86507	Down	0.000283844	0.00125668	-0.729911	--	0.242423	0.386002	--
MSTRG.4680	0.01	0.496667	0.01	0.0966667	5.63421	Up	0.000739296	0.0058858	-5.63421	Down	0.000203523	0.000929048	-2.36119	--	0.0243561	0.060734	--
Os10g0380800	0.02	0.83	0.0933333	1.35333	5.37504	Up	5.38e-07	1.21e-05	-3.15265	Down	0.00112245	0.00432222	0.705334	--	0.353678	0.507238	Similar to Tryptophan decarboxylase.
MSTRG.12165	0.01	0.32	0.01	0.486667	5	Up	0.000355493	0.00321056	-5	Down	0.000110083	0.000529133	0.604862	--	0.61369	0.740858	--
Os05g0584900	0.0166667	0.48	0.183333	0.446667	4.848	Up	5.4e-07	1.21e-05	-1.38857	Down	0.00331271	0.0113766	-0.103836	--	0.545927	0.685928	Conserved hypothetical protein.
Os04g0359700	0.01	0.23	0.0266667	0.0866667	4.52356	Up	0.000548188	0.00460273	-3.10852	Down	0.00391021	0.0131526	-1.40808	--	0.304337	0.456238	Hypothetical conserved gene.
Os10g0379100	0.176667	3.27	1.00667	17.27	4.21019	Up	3.44e-13	2.6e-11	-1.6997	Down	0.00386622	0.0130295	2.40091	--	1.71e-09	1.69e-08	Transferase family protein.
Os12g0457500	0.01	0.113333	0.0133333	0.0533333	3.5025	Up	0.000443474	0.00383981	-3.08746	Down	0.00407134	0.0136124	-1.08746	--	0.272267	0.42092	Conserved hypothetical protein.
Os05g0206100	0.236667	2.32333	0.456667	2.19333	3.29527	Up	4.63e-05	0.000571409	-2.34698	Down	3.71e-06	2.31e-05	-0.0830711	--	0.539789	0.681144	Conserved hypothetical protein.
Os02g0184700	0.06	0.54	0.25	0.226667	3.16993	Up	9.81e-05	0.00108512	-1.11103	Down	0.0168309	0.0468102	-1.25239	--	0.0538745	0.118374	Cytochrome P450 family protein.
Os03g0195800	0.273333	2.41667	1.11	1.22667	3.14429	Up	3.52e-27	1.12e-24	-1.12246	Down	2.25e-05	0.000123174	-0.978275	--	4.89e-06	2.89e-05	Similar to Sulfate transporter (Fragment).
Os01g0692050	0.183333	1.51333	0.683333	1.97	3.04519	Up	0.000440437	0.00381798	-1.14707	Down	0.00629908	0.0199615	0.380466	--	0.673518	0.787378	Conserved hypothetical protein.
Os06g0216300	1.91	14.9033	3.44	18.4067	2.96399	Up	2.23e-38	1.57e-35	-2.11515	Down	2.09e-30	6.86e-29	0.304593	--	0.596591	0.72747	Similar to 12-oxophytodienoic acid reductase.
Os01g0307686	2.98333	23.1	11.4267	54.7767	2.9529	Up	5.09e-44	4.2e-41	-1.01549	Down	3.43e-08	2.83e-07	1.24567	--	1.42e-09	1.41e-08	Similar to embryonic abundant protein-like.
Os01g0825800	6.95333	47.6533	21.8767	36.8267	2.7768	Up	9.73e-97	3.61e-93	-1.12318	Down	4.54e-14	6.45e-13	-0.371826	--	0.000142476	0.000646051	Amino acid transporter transmembrane domain containing protein.
Os08g0169100	0.0233333	0.133333	0.06	0.86	2.51457	Up	0.00175408	0.0121289	-1.152	Down	0.0147222	0.0416458	2.6893	--	1.5e-12	2.03e-11	Hypothetical gene.
Os01g0609300	11.5133	65.5367	26.49	77.4533	2.509	Up	2.51e-36	1.49e-33	-1.30685	Down	2.29e-11	2.62e-10	0.241025	--	0.798892	0.874912	Similar to Pleiotropic drug resistance protein 3.
Os08g0374701	0.303333	1.71333	0.596667	5.67333	2.49783	Up	0.000138187	0.00145568	-1.52181	Down	0.00445275	0.0147387	1.72739	--	0.0011968	0.00438052	Similar to Protein kinase domain containing protein expressed (OsRLCK253).
Os07g0587300	0.633333	3.51667	1.24667	7.57333	2.47317	Up	0.000222166	0.00217073	-1.49613	Down	0.00498464	0.0162646	1.10672	--	0.090252	0.179596	Hypothetical conserved gene.
Os11g0181200	0.426667	2.30333	0.186667	55.8733	2.43254	Up	0.00740541	0.038675	-3.62519	Down	1.89e-05	0.000104745	4.60036	--	1.57e-64	2e-62	Hypothetical protein.
Os01g0773800	0.413333	2.16333	0.223333	5.73667	2.38788	Up	8.76e-05	0.000988432	-3.27599	Down	6.48e-08	5.15e-07	1.40696	--	0.00323159	0.0105894	Hypothetical conserved gene.
Os05g0580000	76.5867	397.057	142.97	478.817	2.37418	Up	1.32e-86	3.27e-83	-1.47363	Down	6.27e-10	6.28e-09	0.270128	--	0.68905	0.798098	Similar to ADP-glucose pyrophosphorylase (EC 2.7.7.27) (Fragment).
MSTRG.22720	0.193333	0.98	0.45	0.83	2.34169	Up	0.000876353	0.00679282	-1.12286	Down	0.00758796	0.023472	-0.23967	--	0.33148	0.484941	--
Os10g0133166	0.106667	0.52	0.0433333	4.97667	2.2854	Up	0.00233241	0.015314	-3.58496	Down	3.74e-05	0.000196357	3.2586	--	1.38e-14	2.25e-13	Conserved hypothetical protein.
MSTRG.14414	0.123333	0.596667	0.176667	0.756667	2.27436	Up	0.01003	0.0491589	-1.7559	Down	0.000476983	0.0020076	0.342733	--	0.845844	0.906233	PREDICTED: calmodulin-like protein 5 [Oryza sativa Japonica Group]
Os01g0136050	0.516667	2.43333	0.436667	1.36667	2.23563	Up	5.71e-05	0.000682164	-2.47833	Down	7.68e-05	0.000380723	-0.832273	--	0.0976489	0.19115	Similar to 16.9 kDa heat shock protein.
Os03g0245800	0.253333	1.17	0.223333	12.21	2.2074	Up	0.000133065	0.00141175	-2.38924	Down	2.1e-05	0.000115583	3.38348	--	9.83e-12	1.22e-10	Similar to Heat shock protein 26.
Os11g0160400	0.916667	3.95667	0.993333	6.64333	2.10982	Up	0.000336658	0.00307375	-1.99394	Down	0.00149755	0.00559628	0.747622	--	0.283384	0.434135	Conserved hypothetical protein.
Os03g0201500	0.736667	3.08667	0.776667	3.73667	2.06697	Up	1.16e-05	0.000173944	-1.99068	Down	5.3e-06	3.23e-05	0.275702	--	0.832404	0.898032	Glycoside hydrolase family 10 protein.
Os02g0513100	5.77333	23.2667	3.47	39.7133	2.01079	Up	3.02e-17	3.58e-15	-2.74526	Down	4.21e-37	1.71e-35	0.771359	--	0.0166441	0.0439884	Similar to MtN3 protein precursor.
Os03g0153900	6.14	23.79	8.83333	27.7067	1.95404	Up	4.22e-29	1.53e-26	-1.42933	Down	8.7e-16	1.41e-14	0.219878	--	0.855905	0.912769	Aromatic-ring hydroxylase family protein.
Os07g0564500	2.52	9.69	4.04333	9.58	1.94307	Up	3.3e-08	1e-06	-1.26095	Down	6.73e-06	4.04e-05	-0.016471	--	0.455117	0.605628	Pyridine nucleotide-disulphide oxidoreductase NAD-binding region domain containing protein.
Os01g0136100	4.23	15.9467	5.89333	75.38	1.91453	Up	5.26e-17	6.11e-15	-1.4361	Down	2.75e-06	1.75e-05	2.24093	--	2.88e-18	6.06e-17	16.9 kDa class I heat shock protein 1.
Os01g0696600	2.62	9.49333	4.36667	7.65667	1.85735	Up	3.1e-11	1.72e-09	-1.12038	Down	3.53e-07	2.55e-06	-0.310198	--	0.0225295	0.0568875	Similar to MDR-like ABC transporter.
Os02g0611250	0.42	1.49	0.423333	1.02	1.82685	Up	0.0021111	0.0141242	-1.81545	Down	1.21e-07	9.26e-07	-0.546743	--	0.0969759	0.190131	Hypothetical gene.
Os03g0296200	0.546667	1.90667	0.306667	3.93667	1.80232	Up	0.000123236	0.001325	-2.63631	Down	2.52e-08	2.11e-07	1.04592	--	0.0175916	0.0461653	Conserved hypothetical protein.
Os05g0542500	5.22	18.13	2.12	240.653	1.79626	Up	1.57e-08	5.11e-07	-3.09624	Down	1.75e-31	5.93e-30	3.73051	--	1.18e-55	1.13e-53	Similar to Isoform 2 of Late embryogenesis abundant protein group 3.
Os05g0527000	0.95	3.27667	0.96	12.79	1.78623	Up	0.000287557	0.00269407	-1.77112	Down	2.32e-06	1.49e-05	1.96472	--	3.62e-07	2.59e-06	UDP-glucuronosyl/UDP-glucosyltransferase family protein.
Os11g0533400	0.586667	2.00333	0.07	21.7133	1.77179	Up	0.0017276	0.0119626	-4.8389	Down	1.33e-11	1.56e-10	3.43811	--	5.15e-43	3.27e-41	Conserved hypothetical protein.
Os04g0578000	1.72	5.81667	2.85333	10.89	1.75778	Up	4.72e-07	1.08e-05	-1.02754	Down	0.00014936	0.000698985	0.904739	--	0.012267	0.0337481	ACC synthase Ethylene biosynthesis
Os02g0575000	7.41667	25.01	7.88667	24.8167	1.75366	Up	4.74e-08	1.39e-06	-1.66502	Down	7.11e-10	7.08e-09	-0.0111957	--	0.448597	0.59956	Conserved hypothetical protein.
Os03g0168100	0.843333	2.79	0.496667	36.5867	1.72609	Up	0.000326221	0.00299877	-2.48992	Down	1.71e-08	1.46e-07	3.71298	--	1.11e-27	3.83e-26	Late embryogenesis abundant protein repeat containing protein.
Os04g0482300	27.0967	88.15	33.5333	52.16	1.70185	Up	3.19e-09	1.2e-07	-1.39436	Down	0.009199	0.027771	-0.757017	--	0.000785974	0.00301563	Kelch related domain containing protein.
Os05g0528500	0.616667	2	0.863333	2.23333	1.69744	Up	0.00882597	0.0443827	-1.21201	Down	0.0130019	0.0373686	0.159199	--	0.941727	0.965963	Conserved hypothetical protein.
Os07g0523965	52.86	171.13	48.8067	113.63	1.69484	Up	7.09e-37	4.29e-34	-1.80994	Down	4.49e-29	1.41e-27	-0.590749	--	6.37e-07	4.38e-06	Similar to Glucose-6-phosphate/phosphate-translocator precursor.
Os07g0523600	46.6733	149.697	43.1067	98.8167	1.68137	Up	2.94e-38	2.03e-35	-1.79606	Down	2.22e-29	7.05e-28	-0.599216	--	7.82e-07	5.3e-06	Similar to Glucose-6-phosphate/phosphate-translocator precursor.
Os03g0739700	10.6167	33.9667	8.15333	19.1	1.67779	Up	5.76e-10	2.54e-08	-2.05866	Down	7.95e-19	1.58e-17	-0.830547	--	2.62e-05	0.000136277	Uncharacterised protein family UPF0114 domain containing protein.
Os03g0192550	0.706667	2.14333	0.563333	1.15333	1.60075	Up	8.32e-05	0.000945418	-1.9278	Down	1.25e-05	7.19e-05	-0.894047	--	0.0156069	0.0416133	Hypothetical gene.
Os11g0670900	30.0767	89.1767	35.9533	80.0133	1.56802	Up	6.18e-14	5.05e-12	-1.31054	Down	1.18e-08	1.03e-07	-0.156426	--	0.102179	0.198259	Conserved hypothetical protein.
Os03g0277300	5.68	16.0267	2.01333	34.9667	1.49651	Up	8.67e-15	7.91e-13	-2.99282	Down	2.95e-36	1.16e-34	1.12551	--	0.00105743	0.00392308	Heat shock protein 70.
Os01g0172100	12.3667	34.5667	15.5167	19.2867	1.48292	Up	4.36e-17	5.11e-15	-1.15556	Down	2.55e-13	3.41e-12	-0.841778	--	1.67e-10	1.84e-09	Similar to Triose phosphate/phosphate translocator non-green plastid chloroplast precursor (CTPT).
Os06g0704000	0.256667	0.703333	0.213333	0.383333	1.45431	Up	0.000630535	0.00515592	-1.7211	Down	0.000100023	0.00048479	-0.875609	--	0.0057457	0.0174708	Protein of unknown function DUF659 domain containing protein.
Os05g0194500	2.67667	7.26667	2.92	5.16333	1.44086	Up	7.89e-11	4.06e-09	-1.31533	Down	1.98e-10	2.09e-09	-0.492991	--	0.00933118	0.0266258	Similar to ANAC075.
Os07g0523400	9.60333	26.02	8.43667	18.56	1.43801	Up	1.38e-29	5.2e-27	-1.62488	Down	2.92e-32	1.02e-30	-0.487424	--	1e-05	5.64e-05	Glucose-6-phosphate/phosphate-translocator precursor.
Os12g0162800	1.97333	5.32667	2.55667	2.82667	1.4326	Up	2.12e-13	1.64e-11	-1.05897	Down	4.63e-13	6.06e-12	-0.914131	--	5.73e-08	4.6e-07	Domain of unknown function DUF1618 domain containing protein.
Os06g0701700	6.46667	17.45	6.22	11.3467	1.43213	Up	1.45e-11	8.51e-10	-1.48824	Down	1.15e-10	1.23e-09	-0.620959	--	0.00125337	0.00455622	Ion transporter Na+/K+ symport
Os01g0734000	1.72333	4.42	2.16	9.28667	1.35884	Up	1.2e-06	2.43e-05	-1.03302	Down	0.000236777	0.00106825	1.07111	--	0.000665066	0.00259183	Similar to WRKY DNA binding protein.
Os02g0134000	8.68667	22.0933	9.22667	13.63	1.34674	Up	1.49e-08	4.85e-07	-1.25973	Down	2.35e-19	4.83e-18	-0.696826	--	5.68e-06	3.32e-05	Similar to bifunctional coenzyme A synthase.
Os02g0649300	12.1	30.6567	1.01	44.1033	1.34119	Up	3.35e-12	2.17e-10	-4.92377	Down	2.04e-06	1.33e-05	0.524687	--	0.068785	0.14465	HD-ZIP I protein Transcription activator Stress response Panicle development
Os02g0149600	0.56	1.41333	0.653333	1.31333	1.3356	Up	0.000167518	0.00170999	-1.11321	Down	4.68e-05	0.00024157	-0.105869	--	0.28744	0.438629	Zinc finger C2H2-like domain containing protein.
Os08g0298700	1.26333	3.18	1.53	5.05333	1.33179	Up	1.74e-07	4.45e-06	-1.0555	Down	1.46e-08	1.26e-07	0.668209	--	0.0378027	0.0879759	Similar to male sterility protein 2.
Os08g0335500	1.52	3.8	1.42	3.49	1.32193	Up	2.28e-09	8.83e-08	-1.42011	Down	2.83e-06	1.8e-05	-0.122772	--	0.106204	0.204431	Hypothetical conserved gene.
Os04g0107900	4.01333	9.99333	0.783333	33.73	1.31616	Up	0.000189985	0.00190139	-3.67327	Down	1.37e-24	3.6e-23	1.75499	--	0.0762565	0.157066	Similar to Heat shock protein 82.
Os03g0723400	4.95333	12.3333	1.67333	123.84	1.31609	Up	7.68e-05	0.000881617	-2.88177	Down	7.45e-11	8.12e-10	3.32784	--	1.97e-28	7.08e-27	Similar to UFG2.
Os02g0744200	18.2733	45.0533	19.42	26.8733	1.30189	Up	2.86e-16	3.08e-14	-1.21409	Down	6.73e-18	1.25e-16	-0.745459	--	1.95e-08	1.67e-07	Alpha-expansin OsEXPA5.
Os04g0445100	1.68333	4.13667	0.256667	7.41	1.29715	Up	3.33e-06	5.94e-05	-4.0105	Down	3.48e-24	8.96e-23	0.841005	--	0.216316	0.35447	Similar to 22.7 kDa class IV heat shock protein precursor.
Os09g0109600	4.31	10.33	3.17333	36.24	1.26108	Up	6.91e-06	0.000110608	-1.70277	Down	1.74e-13	2.36e-12	1.81074	--	1.01e-10	1.14e-09	Small peptide Drought tolerance
Os03g0230300	5.91333	14.1433	6.22333	75.43	1.25808	Up	8.35e-16	8.51e-14	-1.18436	Down	6.81e-12	8.16e-11	2.41502	--	6.91e-36	3.42e-34	Homologue of SRO (similar to RCD one) Regulation of stomatal closure Abiotic stress response
Os01g0615050	6.59	15.67	6.31667	52.4833	1.24965	Up	0.000161073	0.00165058	-1.31077	Down	1.4e-08	1.21e-07	1.74385	--	1.87e-12	2.52e-11	Proteinase inhibitor I13 potato inhibitor I family protein.
Os03g0109000	7.32	17.2333	7.74333	19.4333	1.23529	Up	3.31e-09	1.24e-07	-1.15418	Down	8.01e-08	6.29e-07	0.173332	--	0.923351	0.954447	Similar to NAC domain protein.
Os04g0108101	4.03333	9.44333	0.31	36.42	1.22732	Up	0.00279096	0.0176829	-4.92896	Down	3.45e-25	9.33e-24	1.94736	--	0.0411861	0.0946683	Hypothetical protein.
MSTRG.15138	4.48	10.1267	3.39667	6.07333	1.17659	Up	0.00022431	0.00218735	-1.57597	Down	1.89e-05	0.000105137	-0.737599	--	0.00281305	0.00936645	lysM domain containing protein [Zea mays]
Os02g0162600	6.96667	15.7467	4.93667	31.6533	1.17651	Up	0.000113071	0.00122663	-1.67344	Down	8.23e-08	6.45e-07	1.00731	--	0.00601877	0.0181802	Conserved hypothetical protein.
Os12g0478200	7.11667	15.9433	6.41667	41.1967	1.16368	Up	6.7e-07	1.47e-05	-1.31306	Down	2.12e-08	1.8e-07	1.36957	--	4.01e-11	4.7e-10	Hypothetical protein.
Os03g0197175	51.96	116.15	40.7833	66.49	1.16052	Up	1.2e-17	1.47e-15	-1.50994	Down	9.12e-30	2.93e-28	-0.80478	--	2.78e-18	5.85e-17	Hypothetical gene.
Os06g0697200	1.7	3.79667	1.65667	6.25	1.1592	Up	1.6e-08	5.18e-07	-1.19645	Down	2.41e-08	2.03e-07	0.719123	--	0.00933107	0.0266258	DEAD-box protein abstrakt.
Os04g0136700	29.9133	65.8467	24.5467	34.2633	1.13832	Up	1.07e-17	1.33e-15	-1.42358	Down	4.95e-23	1.21e-21	-0.942445	--	2.09e-22	5.56e-21	Cystathionine beta-synthase core domain containing protein.
Os08g0141400	11.7667	25.4867	9.43	18.4833	1.11504	Up	2.06e-20	3.55e-18	-1.43441	Down	1.6e-33	5.82e-32	-0.463518	--	1.29e-06	8.42e-06	Similar to mRNA clone: RTFL01-03-I20.
Os05g0519700	16.0967	34.6933	1.24667	23.4067	1.1079	Up	4.7e-15	4.46e-13	-4.79851	Down	1.59e-216	8.58e-214	-0.567739	--	0.387757	0.540929	Heat shock protein Long-term acquired thermotolerance
Os03g0231600	15.19	32.3333	14.9133	49.3067	1.0899	Up	4.64e-09	1.69e-07	-1.11642	Down	4.38e-15	6.69e-14	0.60876	--	0.00149608	0.00534275	Similar to Branched-chain-amino-acid aminotransferase 3 chloroplast precursor (EC 2.6.1.42) (Atbcat-3).
Os05g0573300	17.6367	37.47	12.2567	24.8233	1.08716	Up	1.64e-26	5.03e-24	-1.61217	Down	5.19e-60	4.07e-58	-0.594039	--	5.32e-08	4.29e-07	Similar to CTP synthase 1 (EC 6.3.4.2) (UTP--ammonia ligase 1) (CTP synthetase 1).
Os03g0197200	16.2967	34.6067	11.9033	18.17	1.08647	Up	3.14e-07	7.6e-06	-1.53968	Down	9.07e-13	1.16e-11	-0.929492	--	1.55e-10	1.71e-09	Similar to Sorbitol transporter.
Os04g0522500	2.16	4.49	1.18333	3.04	1.05568	Up	0.00100484	0.00761952	-1.92386	Down	1.01e-08	8.88e-08	-0.562644	--	0.026218	0.0646366	2OG-Fe(II) oxygenase domain containing protein.
Os04g0569100	3.13	6.44667	2.59667	7.72667	1.04239	Up	2.33e-09	9e-08	-1.31189	Down	5.19e-11	5.75e-10	0.261293	--	0.709796	0.812647	Similar to OCL1 homeobox protein.
Os10g0323500	0.623333	1.27	0.533333	0.896667	1.02675	Up	0.00519375	0.029196	-1.25172	Down	1.67e-05	9.37e-05	-0.502185	--	0.109845	0.209648	Similar to Beta-glucosidase.
Os10g0517500	66.98	136.197	66.0767	114.723	1.02389	Up	0.000465944	0.00400051	-1.04348	Down	1.76e-05	9.83e-05	-0.247533	--	0.122963	0.229409	Cys/Met metabolism pyridoxal phosphate-dependent enzyme domain containing protein.
Os02g0530300	9.87	20.0667	8.69	16.8433	1.02368	Up	4.07e-12	2.61e-10	-1.20737	Down	7.79e-21	1.72e-19	-0.252623	--	0.0067342	0.0200463	Zinc finger AN1-type domain containing protein.
Os11g0112400	2.57333	5.20667	2.34333	2.86667	1.01672	Up	4.39e-05	0.000545539	-1.1518	Down	5.3e-11	5.87e-10	-0.860986	--	9.26e-06	5.24e-05	Peroxidase (EC 1.11.1.7).
Os01g0712700	28.6833	57.6533	24.6167	60.7033	1.00719	Up	4.66e-07	1.07e-05	-1.22777	Down	3.01e-10	3.12e-09	0.0743717	--	0.512314	0.656795	CMP/dCMP deaminase zinc-binding domain containing protein.

## Sheet: Gene set C
Table S6. Shoot down-regulated DEGs with expressions recovered by homogeneous sulfate resupply
Gene ID	CK_Sh_mean	S0_Sh_mean	SR_Sh_mean	SP_Sh_mean	Log2 (S0/CK)	Up/Down (S0/CK)	P_Value (S0/CK)	FDR (S0/CK)	Log2 (SR/S0)	Up/Down (SR/S0)	P_Value (SR/S0)	FDR (SR/S0)	Log2 (SP/S0)	Up/Down (SP/S0)	P_Value (SP/S0)	FDR (SP/S0)	Annotation
MSTRG.14825	2.56	1.17667	2.52667	2.69	-1.12144	Down	0.00549765	0.0177315	1.10253	Up	0.00549765	0.0177315	1.1929	Up	0.00068072	0.0026478	--
MSTRG.26471	0.463333	0.08	0.826667	0.436667	-2.53398	Down	0.000170822	0.000791379	3.36923	Up	0.000170822	0.000791379	2.44846	Up	0.0166751	0.0440561	--
MSTRG.32455	0.573333	0.133333	3.57333	1.74333	-2.10434	Down	1.11e-27	3.31e-26	4.74416	Up	1.11e-27	3.31e-26	3.70874	Up	4.84e-11	5.61e-10	--
MSTRG.33257	13.6633	5.76333	16.93	11.78	-1.24533	Down	3.48e-05	0.000184125	1.55461	Up	3.48e-05	0.000184125	1.03136	Up	0.0102603	0.0289314	PREDICTED: probable receptor-like protein kinase At5g15080 [Oryza sativa Japonica Group]
Os01g0102900	152.517	66.5233	5965.51	2747.84	-1.19703	Down	0	0	6.48664	Up	0	0	5.3683	Up	8.31e-188	1.12e-184	light-induced protein 1-like putative expressed
Os01g0222600	59.17	15.1233	74.2233	46.9667	-1.96809	Down	3.05e-26	8.66e-25	2.2951	Up	3.05e-26	8.66e-25	1.63486	Up	2.87e-12	3.8e-11	Conserved hypothetical protein.
Os01g0303800	18.4467	5.40667	24.4	16.69	-1.77055	Down	6.55e-19	1.31e-17	2.17407	Up	6.55e-19	1.31e-17	1.62617	Up	4.35e-12	5.64e-11	UspA domain containing protein.
Os01g0313300	3.59	1.21333	13.25	2.92333	-1.56501	Down	2.42e-29	7.68e-28	3.44894	Up	2.42e-29	7.68e-28	1.26864	Up	0.00660685	0.0197215	Similar to EREBP-3 protein (Fragment).
Os01g0387133	2.15	0.706667	2.78333	2.32667	-1.60523	Down	0.00106377	0.00411877	1.97771	Up	0.00106377	0.00411877	1.71916	Up	0.00987566	0.0279538	Hypothetical gene.
Os01g0392600	3.04667	0.683333	3.55	2.75333	-2.15657	Down	4.47e-06	2.75e-05	2.37716	Up	4.47e-06	2.75e-05	2.01052	Up	0.00120939	0.00442009	Conserved hypothetical protein.
Os01g0542100	0.116667	0.00666667	0.06	0.0866667	-4.12928	Down	0.0169945	0.0472031	3.16993	Up	0.0169945	0.0472031	3.70044	Up	0.00491613	0.0152339	Conserved hypothetical protein.
Os01g0757200	15.6	3.16	9.51	11.2167	-2.30355	Down	3.36e-07	2.44e-06	1.58952	Up	3.36e-07	2.44e-06	1.82765	Up	4.7e-10	4.92e-09	GA 2-oxidase3 GA metabolism
Os01g0844000	7.13333	3.16667	9.65	7.22	-1.17161	Down	3.46e-07	2.51e-06	1.60756	Up	3.46e-07	2.51e-06	1.18903	Up	0.00173215	0.0060886	Conserved hypothetical protein.
Os01g0879100	12.37	5.84333	15.0867	16.6233	-1.08198	Down	0.000195243	0.000894339	1.36841	Up	0.000195243	0.000894339	1.50835	Up	3.28e-05	0.000167972	Hypothetical protein.
Os01g0973100	1.94333	0.74	18.56	4.87667	-1.39294	Down	6.57e-18	1.22e-16	4.64853	Up	6.57e-18	1.22e-16	2.7203	Up	5.8e-08	4.65e-07	Hypothetical conserved gene.
Os02g0187700	18.3633	2.06333	22.69	9.92333	-3.15378	Down	2.05e-36	8.13e-35	3.45901	Up	2.05e-36	8.13e-35	2.26585	Up	2.26e-18	4.78e-17	Similar to Myb-related protein B (B-Myb) (Myb-related protein 1) (XMYB1).
Os02g0199800	0.583333	0.21	0.703333	0.56	-1.47393	Down	4.62e-06	2.84e-05	1.74382	Up	4.62e-06	2.84e-05	1.41504	Up	0.000758646	0.0029201	Similar to No pollen.
Os02g0240300	2.55	0.87	55.32	7.07667	-1.55141	Down	4.16e-52	2.64e-50	5.99064	Up	4.16e-52	2.64e-50	3.02398	Up	2.28e-07	1.68e-06	Similar to Class III peroxidase GvPx2b (Fragment).
Os02g0302200	10.5567	4.72333	15.4333	18.4533	-1.16028	Down	5.89e-14	8.28e-13	1.70817	Up	5.89e-14	8.28e-13	1.966	Up	1.69e-27	5.81e-26	Similar to aminotransferase family protein.
Os02g0505500	4.75667	1.48333	4.98667	3.80333	-1.68111	Down	1.98e-08	1.69e-07	1.74923	Up	1.98e-08	1.69e-07	1.35842	Up	6.44e-05	0.000312883	Conserved hypothetical protein.
Os02g0676800	0.296667	0.07	0.443333	0.576667	-2.08342	Down	0.000923858	0.0036351	2.66297	Up	0.000923858	0.0036351	3.04231	Up	4.33e-05	0.000217633	Similar to Dehydration responsive element binding protein 1E (DREB1E protein).
Os02g0695900	5.08333	2.46333	5.84	5.16333	-1.04516	Down	0.00635167	0.0200981	1.24536	Up	0.00635167	0.0200981	1.06769	Up	0.0173159	0.0455155	Similar to oligopeptide transporter 4.
Os02g0762200	4.81	2.02333	5.75	5.11333	-1.2493	Down	1.2e-08	1.05e-07	1.50683	Up	1.2e-08	1.05e-07	1.33753	Up	6.59e-07	4.51e-06	Zinc finger CCHC-type domain containing protein.
Os02g0772100	0.27	0.02	0.413333	0.22	-3.75489	Down	0.000393396	0.00168946	4.36923	Up	0.000393396	0.00168946	3.45943	Up	0.0143634	0.0387015	Conserved hypothetical protein.
Os03g0119700	1.84	0.79	3.79	3.49333	-1.21978	Down	1.41e-13	1.93e-12	2.26227	Up	1.41e-13	1.93e-12	2.14468	Up	7.21e-19	1.58e-17	Pentatricopeptide repeat domain containing protein.
Os03g0125600	36.0633	17.39	47.71	39.4733	-1.05227	Down	1.12e-09	1.09e-08	1.45603	Up	1.12e-09	1.09e-08	1.18262	Up	8.9e-14	1.35e-12	Ser Thr specific protein kinase-like protein.
Os03g0409100	10.3333	4.72	18.07	13.8533	-1.13045	Down	3.09e-06	1.95e-05	1.93674	Up	3.09e-06	1.95e-05	1.55337	Up	9.67e-07	6.43e-06	Hypothetical conserved gene.
Os03g0606333	0.773333	0.09	0.843333	0.663333	-3.10309	Down	0.00251789	0.0089161	3.22811	Up	0.00251789	0.0089161	2.88174	Up	0.0108145	0.0302993	Hypothetical gene.
Os03g0702500	1.07333	0.376667	1.41667	1.41333	-1.51074	Down	0.00310745	0.0107543	1.91114	Up	0.00310745	0.0107543	1.90774	Up	0.00089293	0.00338161	UDP-glucuronosyl/UDP-glucosyltransferase family protein.
Os03g0748300	3.93667	1.84	55.32	37.74	-1.09727	Down	1.23e-48	7.18e-47	4.91002	Up	1.23e-48	7.18e-47	4.35832	Up	1.31e-35	6.44e-34	Aldose 1-epimerase family protein.
Os03g0805700	4.51667	2.11333	5.74	5.85667	-1.09574	Down	0.00031707	0.00138906	1.44153	Up	0.00031707	0.00138906	1.47056	Up	2.2e-05	0.000116276	Similar to Pheophorbide a oxygenase.
Os04g0119000	3.52	0.876667	76.19	28.5833	-2.00548	Down	1.54e-88	1.93e-86	6.44143	Up	1.54e-88	1.93e-86	5.027	Up	7.19e-55	6.7e-53	Similar to H0716A07.5 protein.
Os04g0323500	1.47	0.706667	2.23	2.14	-1.05671	Down	0.00091499	0.00360378	1.65794	Up	0.00091499	0.00360378	1.59851	Up	4.54e-05	0.00022726	Hypothetical protein.
Os04g0388700	5.57667	2.76333	13.6367	7.82333	-1.01299	Down	3.33e-25	9.03e-24	2.30301	Up	3.33e-25	9.03e-24	1.50137	Up	6.7e-09	6.11e-08	Similar to OSIGBa0096P03.3 protein.
Os04g0535200	12.68	3.54667	16.6967	10.2733	-1.83802	Down	5.86e-11	6.45e-10	2.23502	Up	5.86e-11	6.45e-10	1.53437	Up	6.02e-06	3.51e-05	Peptidase A1 domain containing protein.
Os04g0583200	10.3567	3.52	8.85667	7.27667	-1.55691	Down	7.18e-06	4.3e-05	1.33119	Up	7.18e-06	4.3e-05	1.0477	Up	0.000319573	0.0013413	Conserved hypothetical protein.
Os04g0659300	57.0467	15.47	108.71	161.35	-1.88267	Down	0.000408779	0.00174697	2.81294	Up	0.000408779	0.00174697	3.38265	Up	0.000528999	0.00211001	Receptor-like protein Root development Salt stress response Regulation of iron acquisition
Os04g0659800	1.79	0.833333	3.00333	2.96	-1.10299	Down	3.48e-09	3.22e-08	1.8496	Up	3.48e-09	3.22e-08	1.82863	Up	3.36e-06	2.04e-05	Similar to OSIGBa0132E09-OSIGBa0108L24.20 protein.
Os04g0679400	58.8833	25.9167	181.217	152.19	-1.18398	Down	6.1e-99	9.06e-97	2.80576	Up	6.1e-99	9.06e-97	2.55392	Up	3.67e-78	6.36e-76	Similar to H0801D08.15 protein.
Os04g0688300	26.5033	9.82333	24.0633	32.9967	-1.43189	Down	8.73e-14	1.22e-12	1.29255	Up	8.73e-14	1.22e-12	1.74804	Up	7.19e-31	2.89e-29	Haem peroxidase plant/fungal/bacterial family protein.
Os05g0215300	4.45333	2.14	8.93333	6.32	-1.05727	Down	2.1e-16	3.55e-15	2.06159	Up	2.1e-16	3.55e-15	1.56231	Up	9.33e-08	7.25e-07	UDP-glucuronosyl/UDP-glucosyltransferase family protein.
Os05g0344200	122.293	46.6867	196.55	227.08	-1.38926	Down	1.52e-20	3.3e-19	2.07381	Up	1.52e-20	3.3e-19	2.28212	Up	1.01e-23	2.89e-22	Conserved hypothetical protein.
Os05g0355400	10.6	1.22	98.7567	97.22	-3.11911	Down	1.87e-115	3.57e-113	6.33893	Up	1.87e-115	3.57e-113	6.3163	Up	1.28e-137	8.28e-135	UspA domain containing protein.
Os05g0491000	9.16	3.70333	12.69	9.41667	-1.30652	Down	6.65e-05	0.000333124	1.7768	Up	6.65e-05	0.000333124	1.34639	Up	0.00379543	0.0121908	EF-Hand type domain containing protein.
Os05g0491200	7.64667	3.34	17.8933	11.61	-1.19498	Down	3.79e-18	7.2e-17	2.4215	Up	3.79e-18	7.2e-17	1.79745	Up	1.54e-20	3.71e-19	Similar to SNF1 kinase complex anchoring protein (Fragment).
Os05g0525900	13.02	6.05667	20.53	15.06	-1.10413	Down	2.83e-06	1.8e-05	1.76114	Up	2.83e-06	1.8e-05	1.31413	Up	0.000318322	0.00133665	Similar to Zing finger transcription factor PEI1.
Os05g0555600	1.68333	0.46	38.58	14.57	-1.87162	Down	2.28e-111	4.07e-109	6.39008	Up	2.28e-111	4.07e-109	4.98522	Up	9.83e-60	1.07e-57	Similar to Glutamate synthase [NADH] amyloplastic.
Os06g0147100	102.607	26.5267	179.423	116.81	-1.95161	Down	5.28e-23	1.29e-21	2.75785	Up	5.28e-23	1.29e-21	2.13865	Up	2.72e-14	4.31e-13	Similar to cDNA clone:J023088C01 full insert sequence.
Os06g0271400	2.20667	0.906667	5.78333	2.43333	-1.28322	Down	2.17e-20	4.68e-19	2.67326	Up	2.17e-20	4.68e-19	1.42429	Up	8.86e-05	0.000420215	Transposase Ptta/En/Spm plant domain containing protein.
Os06g0295900	1.97333	0.693333	3.46	3.35	-1.50901	Down	3.36e-10	3.46e-09	2.31915	Up	3.36e-10	3.46e-09	2.27254	Up	9.87e-12	1.23e-10	Hypothetical conserved gene.
Os06g0306600	4.32333	2.12333	7.00333	7.87667	-1.02581	Down	5.04e-13	6.59e-12	1.72171	Up	5.04e-13	6.59e-12	1.89125	Up	6.88e-13	9.69e-12	Alpha/beta hydrolase fold-3 domain containing protein.
Os06g0559400	2.79	0.743333	13.1133	8.44667	-1.90818	Down	8.97e-44	4.57e-42	4.14088	Up	8.97e-44	4.57e-42	3.5063	Up	2.23e-35	1.09e-33	Conserved hypothetical protein.
Os06g0559600	0.803333	0.316667	1.27667	0.766667	-1.34303	Down	3.85e-13	5.07e-12	2.01134	Up	3.85e-13	5.07e-12	1.27563	Up	4.21e-05	0.00021173	Hypothetical conserved gene.
Os06g0564700	1.23667	0.59	2.90333	3.42333	-1.06767	Down	1.55e-13	2.11e-12	2.29892	Up	1.55e-13	2.11e-12	2.53661	Up	5.44e-16	9.83e-15	Similar to Cysteine synthase (EC 4.2.99.8).
Os06g0582600	13.5367	4.42667	18.0433	21.8333	-1.61258	Down	1.24e-10	1.33e-09	2.02717	Up	1.24e-10	1.33e-09	2.30224	Up	2.87e-15	4.9e-14	Similar to Cysteine proteinase.
Os06g0634700	1.22667	0.583333	3.73333	2.88333	-1.07235	Down	4.82e-19	9.74e-18	2.67807	Up	4.82e-19	9.74e-18	2.30535	Up	5.1e-10	5.31e-09	Conserved hypothetical protein.
Os06g0637500	28.68	11.0467	28.11	26.4033	-1.37643	Down	2.28e-08	1.93e-07	1.34747	Up	2.28e-08	1.93e-07	1.25711	Up	4.31e-15	7.29e-14	Similar to MYB transcription factor R2R3 type.
Os06g0642500	1.42	0.596667	4.61	3.34333	-1.25089	Down	1.28e-30	4.24e-29	2.94977	Up	1.28e-30	4.24e-29	2.48629	Up	3.78e-21	9.44e-20	Cytochrome P450 domain containing protein.
Os06g0697000	197.243	53.4033	182.39	188.9	-1.88497	Down	5.82e-08	4.66e-07	1.77202	Up	5.82e-08	4.66e-07	1.82262	Up	5.44e-18	1.12e-16	Similar to Xyloglucan endo-transglucosylase/hydrolase 1.
Os06g0698748	29.5167	6.44667	46.4767	35.8667	-2.1949	Down	1.08e-78	1.2e-76	2.84988	Up	1.08e-78	1.2e-76	2.47602	Up	3.28e-36	1.64e-34	Similar to cDNA clone:J023083M02 full insert sequence.
Os07g0153150	0.33	0.07	0.696667	0.896667	-2.23704	Down	2.7e-05	0.000146199	3.31504	Up	2.7e-05	0.000146199	3.67914	Up	9.44e-05	0.000444641	Conserved hypothetical protein.
Os03g0185000	0.123333	0.0233333	0.28	0.453333	-2.4021	Down	5.58e-06	3.39e-05	3.58496	Up	5.58e-06	3.39e-05	4.28011	Up	1.11e-06	7.3e-06	Serine acetyltransferase
Os07g0235200	0.226667	0.0166667	1.04667	0.26	-3.76553	Down	2.13e-15	3.34e-14	5.97269	Up	2.13e-15	3.34e-14	3.96347	Up	0.000559102	0.00221617	Protein of unknown function DUF296 domain containing protein.
Os07g0417600	0.616667	0.01	0.656667	0.343333	-5.94642	Down	0.000230476	0.00104249	6.03709	Up	0.000230476	0.00104249	5.10154	Up	0.00028852	0.00122267	Thaumatin pathogenesis-related family protein.
Os07g0593000	3.71333	0.84	3.17	3.26333	-2.14425	Down	1.5e-05	8.48e-05	1.91602	Up	1.5e-05	8.48e-05	1.95789	Up	0.000696906	0.0027033	C2H2 transcription factor Leaf development
Os07g0663800	29.49	12.9233	59.11	56.04	-1.19025	Down	1.54e-13	2.09e-12	2.19342	Up	1.54e-13	2.09e-12	2.11648	Up	8.05e-39	4.47e-37	Similar to Oxidoreductase short chain dehydrogenase/reductase family protein expressed.
Os08g0137400	24.9667	10.0467	32.9867	26.1733	-1.31329	Down	6.27e-11	6.89e-10	1.71517	Up	6.27e-11	6.89e-10	1.38138	Up	2.92e-06	1.79e-05	Cupredoxin domain containing protein.
Os08g0452500	5.27333	1.17	5.91333	2.93667	-2.17221	Down	2.83e-13	3.77e-12	2.33746	Up	2.83e-13	3.77e-12	1.32767	Up	0.00109264	0.00403846	Auxin responsive SAUR protein family protein.
Os08g0462300	2.48	1.11	3.06667	2.50333	-1.15978	Down	9.21e-08	7.18e-07	1.46611	Up	9.21e-08	7.18e-07	1.17329	Up	0.0081724	0.0237316	Cyclin-like F-box domain containing protein.
Os09g0128400	3.91667	1.63667	16.4767	14.4733	-1.25887	Down	2e-52	1.29e-50	3.33159	Up	2e-52	1.29e-50	3.14456	Up	4.6e-51	3.78e-49	Conserved hypothetical protein.
Os09g0273950	12.2267	5.91667	23.42	11.99	-1.04717	Down	6.61e-24	1.68e-22	1.98488	Up	6.61e-24	1.68e-22	1.01898	Up	0.000201048	0.000881104	Conserved hypothetical protein.
Os09g0328800	3.64	1.71667	3.80667	3.86	-1.08433	Down	0.0126936	0.0365953	1.14892	Up	0.0126936	0.0365953	1.16899	Up	0.0134748	0.0366174	Hypothetical conserved gene.
Os09g0400200	5.65	2.71667	27.29	16.4067	-1.05641	Down	1.53e-89	1.96e-87	3.32846	Up	1.53e-89	1.96e-87	2.59437	Up	1.75e-48	1.31e-46	Similar to Cinnamyl alcohol dehydrogenase (EC 1.1.1.195).
Os09g0481800	10.7633	5.35667	18.5833	13.0467	-1.00672	Down	6.15e-07	4.31e-06	1.7946	Up	6.15e-07	4.31e-06	1.28427	Up	0.000253307	0.00108737	Nitrogen-fixing NifU C-terminal domain containing protein.
Os09g0545300	7.54667	3.77	26.7333	21.5467	-1.00128	Down	9.3e-41	4.25e-39	2.826	Up	9.3e-41	4.25e-39	2.51483	Up	1.25e-29	4.78e-28	SAUR family protein Negative regulator of auxin synthesis and transport
Os10g0165400	17.3633	8.14667	29.67	20.2767	-1.09176	Down	7.57e-08	5.95e-07	1.86472	Up	7.57e-08	5.95e-07	1.31554	Up	0.000328306	0.00137475	Hypothetical gene.
Os10g0166600	6.98333	2.14333	28.7767	19.5833	-1.70406	Down	2.58e-84	3.07e-82	3.74697	Up	2.58e-84	3.07e-82	3.1917	Up	4.12e-38	2.23e-36	Cytochrome P450 family protein.
Os10g0180800	15.57	4.22333	14.88	10.92	-1.88231	Down	1.39e-30	4.59e-29	1.81692	Up	1.39e-30	4.59e-29	1.37052	Up	6.25e-07	4.3e-06	Wall-associated kinase Negative regulation of rice blast resistance
Os10g0330000	131.457	62.1667	422.74	255.01	-1.08037	Down	8.37e-37	3.36e-35	2.76556	Up	8.37e-37	3.36e-35	2.03634	Up	1.28e-22	3.44e-21	Conserved hypothetical protein.
Os10g0338858	0.563333	0.0333333	0.956667	1.01667	-4.07895	Down	0.000413216	0.00176379	4.84298	Up	0.000413216	0.00176379	4.93074	Up	0.000463173	0.00187676	Conserved hypothetical protein.
Os10g0396300	11.2567	3.91333	21.59	8.46667	-1.52431	Down	4.52e-57	3.24e-55	2.46389	Up	4.52e-57	3.24e-55	1.1134	Up	1.67e-07	1.26e-06	Similar to MOB1.
Os10g0427900	4.84667	2.32	5.3	5.58333	-1.06287	Down	1.7e-06	1.12e-05	1.19187	Up	1.7e-06	1.12e-05	1.267	Up	3.28e-08	2.73e-07	Conserved hypothetical protein.
Os10g0462600	11.56	5.20667	18.0367	11.1933	-1.15071	Down	2.21e-20	4.76e-19	1.7925	Up	2.21e-20	4.76e-19	1.10421	Up	2.14e-06	1.34e-05	Conserved hypothetical protein.
Os10g0498100	0.92	0.433333	1.21333	0.936667	-1.08616	Down	0.000137009	0.000645083	1.48543	Up	0.000137009	0.000645083	1.11206	Up	0.0174544	0.0458401	Alpha/beta hydrolase fold-1 domain containing protein.
Os10g0524600	31.1567	10.5633	28.32	31.1467	-1.56048	Down	8.48e-12	1.01e-10	1.42276	Up	8.48e-12	1.01e-10	1.56001	Up	1.07e-27	3.7e-26	Peptidase S8 subtilisin-related domain containing protein.
Os10g0565150	10.1033	4.96333	10.17	19.96	-1.02545	Down	0.000385466	0.0016585	1.03494	Up	0.000385466	0.0016585	2.00773	Up	1.15e-18	2.48e-17	Hypothetical gene.
Os11g0145200	15.4633	6.32	27.0233	12.7733	-1.29085	Down	1.99e-41	9.29e-40	2.09621	Up	1.99e-41	9.29e-40	1.01514	Up	2.07e-05	0.000109568	UDP-glucuronosyl/UDP-glucosyltransferase family protein.
Os11g0153100	2.52	0.636667	6.95667	4.44667	-1.98481	Down	1.75e-13	2.37e-12	3.44979	Up	1.75e-13	2.37e-12	2.80411	Up	3.54e-07	2.54e-06	Conserved hypothetical protein.
Os11g0212900	0.92	0.446667	1.17667	2.05667	-1.04244	Down	0.00361495	0.0122831	1.39744	Up	0.00361495	0.0122831	2.20304	Up	7.96e-11	9.05e-10	Serine/threonine protein kinase-related domain containing protein.
Os11g0471300	0.273333	0.0666667	1.04	0.273333	-2.03562	Down	1.42e-09	1.37e-08	3.96347	Up	1.42e-09	1.37e-08	2.03562	Up	0.00882847	0.0253928	Similar to OSIGBa0145N07.3 protein.
Os11g0481500	5.88333	2.85667	6.78667	5.93	-1.0423	Down	0.00188699	0.00688391	1.24837	Up	0.00188699	0.00688391	1.0537	Up	0.00452573	0.0141867	Conserved hypothetical protein.
Os11g0655900	3.24667	0.5	3.20333	1.59	-2.69896	Down	1.76e-07	1.32e-06	2.67957	Up	1.76e-07	1.32e-06	1.66903	Up	0.0185436	0.0482694	Thioredoxin fold domain containing protein.
Os11g0671000	622.193	222.773	2162.33	2001.42	-1.48179	Down	4.28e-277	4.39e-274	3.27894	Up	4.28e-277	4.39e-274	3.16737	Up	3.08e-197	4.99e-194	Similar to Dormancy-associated protein.
Os11g0671100	30.5433	10.0067	87.8767	77.1667	-1.6099	Down	7.91e-88	9.85e-86	3.13452	Up	7.91e-88	9.85e-86	2.94702	Up	8.17e-62	9.37e-60	Hypothetical protein.
Os12g0160650	0.16	0.01	0.223333	0.203333	-4	Down	0.000543669	0.00226075	4.48113	Up	0.000543669	0.00226075	4.34577	Up	0.000176535	0.00078502	Hypothetical protein.
Os12g0256000	4.62	2.05	13.0633	7.96	-1.17227	Down	1.02e-42	4.98e-41	2.67183	Up	1.02e-42	4.98e-41	1.95714	Up	8.32e-21	2.04e-19	Alpha/beta hydrolase fold-3 domain containing protein.
Os12g0267900	4.68333	2.06667	11.3467	6.77333	-1.18023	Down	3.78e-15	5.8e-14	2.45689	Up	3.78e-15	5.8e-14	1.71256	Up	7.9e-08	6.21e-07	Zinc finger RING/FYVE/PHD-type domain containing protein.
Os12g0428000	29.55	8.1	19.82	32.18	-1.86716	Down	0.000126638	0.000600797	1.29096	Up	0.000126638	0.000600797	1.99017	Up	1.57e-17	3.14e-16	Similar to senescence-associated protein DIN1.
Os12g0446900	2.2	0.766667	2.10667	1.76	-1.52083	Down	0.000703825	0.00285204	1.45829	Up	0.000703825	0.00285204	1.1989	Up	0.00869753	0.0250629	Similar to bifunctional dihydrofolate reductase-thymidylate synthase.
Os12g0527301	5.00333	2.4	10.6333	7.39667	-1.05986	Down	3.53e-12	4.34e-11	2.14749	Up	3.53e-12	4.34e-11	1.62384	Up	5.77e-05	0.000282606	Hypothetical gene.
Os12g0549700	5.86667	2.27333	7.74333	6.11667	-1.36773	Down	8.1e-05	0.000399608	1.76815	Up	8.1e-05	0.000399608	1.42794	Up	0.00214052	0.00735902	Hypothetical conserved gene.

## Sheet: Gene set D
Table S6. Shoot down-regulated DEGs with expressions recovered by heterogeneous sulfate resupply
Gene ID	CK_Sh_mean	S0_Sh_mean	SR_Sh_mean	SP_Sh_mean	Log2 (S0/CK)	Up/Down (S0/CK)	P_Value (S0/CK)	FDR (S0/CK)	Log2 (SR/S0)	Up/Down (SR/S0)	P_Value (SR/S0)	FDR (SR/S0)	Log2 (SP/S0)	Up/Down (SP/S0)	P_Value (SP/S0)	FDR (SP/S0)	Annotation
Os07g0633400	0.863333	0.0666667	0.523333	0.113333	-3.69488	Down	0.000411562	0.0017572	2.97269	Up	0.000411562	0.0017572	0.765535	--	0.696498	0.803635	IQ calmodulin-binding region domain containing protein.
Os01g0171200	0.423333	0.04	0.196667	0.0133333	-3.40372	Down	0.0115752	0.0337997	2.29768	Up	0.0115752	0.0337997	-1.58496	--	0.321634	0.474524	Conserved hypothetical protein.
Os01g0935800	5.35	0.646667	2.63	0.2	-3.04844	Down	0.000160386	0.000746822	2.02397	Up	0.000160386	0.000746822	-1.69302	--	0.00906441	0.0259747	Similar to BRASSINOSTEROID INSENSITIVE 1-associated receptor kinase 1.
Os10g0551800	5.29	0.67	3.32667	0.873333	-2.98103	Down	0.00835626	0.0255513	2.31184	Up	0.00835626	0.0255513	0.382371	--	0.874318	0.925071	Root-specific protein (RCc2 protein).
Os02g0757100	69.5933	9.14	62.1433	15.3867	-2.92868	Down	3.94e-119	8.03e-117	2.76533	Up	3.94e-119	8.03e-117	0.751415	--	0.0488527	0.109151	Similar to Phi-1 protein.
Os06g0696400	413.867	58.6067	251.67	90.8	-2.82003	Down	3.79e-19	7.7e-18	2.1024	Up	3.79e-19	7.7e-18	0.631628	--	0.0415637	0.0954145	Xyloglycan endo-transglycosylase precursor.
Os05g0217800	27.7333	3.98667	9.97667	3.91	-2.79837	Down	0.00314391	0.0108651	1.32337	Up	0.00314391	0.0108651	-0.0280144	--	0.423015	0.575271	BURP domain containing protein.
Os01g0909400	7.95667	1.28	5.32	2.25	-2.63602	Down	1.04e-15	1.67e-14	2.05528	Up	1.04e-15	1.67e-14	0.813781	--	0.0450294	0.101957	Protein of unknown function DUF868 plant family protein.
Os05g0217000	60.3433	9.99667	44.3767	7.20667	-2.59368	Down	8.19e-09	7.26e-08	2.15028	Up	8.19e-09	7.26e-08	-0.472115	--	0.0370851	0.0865665	Protein of unknown function DUF1070 family protein.
MSTRG.9710	5.2	1.02333	4.24333	1.25667	-2.34524	Down	4.37e-13	5.74e-12	2.05192	Up	4.37e-13	5.74e-12	0.296326	--	0.719459	0.819195	hydroxyproline-rich glycoprotein -like [Oryza sativa Japonica Group]
Os06g0220600	3.01	0.62	2.11	0.94	-2.27942	Down	8.02e-06	4.76e-05	1.7669	Up	8.02e-06	4.76e-05	0.600393	--	0.47483	0.623902	RNA recognition motif domain domain containing protein.
Os03g0286500	51.77	10.8033	25.88	13.79	-2.26064	Down	9.89e-07	6.74e-06	1.26036	Up	9.89e-07	6.74e-06	0.352146	--	0.593478	0.724872	Similar to RNA-binding region containing protein 1 (HSRNASEB) (ssDNA binding protein SEB4) (CLL-associated antigen KW-5). Splice isoform 2.
Os08g0414500	6.37	1.33	4.44667	2.06333	-2.25987	Down	0.00448674	0.0148388	1.7413	Up	0.00448674	0.0148388	0.633551	--	0.460194	0.610357	Hypothetical conserved gene.
Os10g0195600	9.18333	2.00667	4.53333	1.82667	-2.19422	Down	0.000171189	0.000792963	1.17577	Up	0.000171189	0.000792963	-0.135588	--	0.259482	0.406502	Transferase family protein.
Os06g0696450	4.62	1.03333	4.54	1.19	-2.16059	Down	2.32e-06	1.49e-05	2.13539	Up	2.32e-06	1.49e-05	0.203656	--	0.996932	0.99834	Hypothetical protein.
Os09g0524001	2.41667	0.563333	1.51667	0.713333	-2.10096	Down	0.00782533	0.02411	1.42884	Up	0.00782533	0.02411	0.340588	--	0.786756	0.866594	Hypothetical gene.
Os02g0756200	1.37333	0.323333	1.37667	0.38	-2.08659	Down	0.00902912	0.0273231	2.09009	Up	0.00902912	0.0273231	0.232977	--	0.977163	0.986559	Similar to Phi-1-like phosphate-induced protein.
Os09g0423500	18.83	4.48667	13.7867	6.63	-2.06932	Down	1.13e-09	1.1e-08	1.61956	Up	1.13e-09	1.1e-08	0.563365	--	0.184121	0.313658	Peptidase A1 domain containing protein.
Os04g0604300	24.08	5.94	25.6933	4.41667	-2.0193	Down	3.99e-27	1.17e-25	2.11286	Up	3.99e-27	1.17e-25	-0.427505	--	0.0430491	0.0982352	Similar to Xyloglucan endotransglucosylase/hydrolase protein 24 precursor (EC 2.4.1.207) (At-XTH24) (XTH-24) (Meristem protein 5) (MERI-5 protein) (MERI5 protein) (Endo-xyloglucan transferase) (Xyloglucan endo-1 4-beta-D-glucanase).
Os01g0740400	1.93	0.49	1.93333	0.806667	-1.97775	Down	0.000466401	0.00196701	1.98024	Up	0.000466401	0.00196701	0.719191	--	0.350784	0.504447	Protein of unknown function DUF1005 family protein.
Os02g0756600	1.58667	0.403333	1.85667	0.32	-1.97595	Down	0.00148065	0.005539	2.20267	Up	0.00148065	0.005539	-0.333901	--	0.528549	0.671424	Similar to Phi-1 protein.
Os06g0207966	11.3267	2.88333	7.61667	5.00667	-1.97391	Down	1.74e-06	1.14e-05	1.40142	Up	1.74e-06	1.14e-05	0.796113	--	0.0373649	0.0871446	Similar to Homeobox-leucine zipper protein ROC8.
Os02g0285300	126.22	32.9333	85.86	16.0433	-1.93832	Down	4.11e-06	2.55e-05	1.38244	Up	4.11e-06	2.55e-05	-1.03757	--	1.7e-05	9.17e-05	DREPP plasma membrane polypeptide family protein.
Os03g0119300	40.5767	11.0967	28.69	18.2867	-1.87052	Down	1.44e-07	1.09e-06	1.37042	Up	1.44e-07	1.09e-06	0.720666	--	0.00977437	0.0276936	Peptidase S8 subtilisin-related domain containing protein.
Os07g0590700	239.587	65.77	176.86	99.7867	-1.86505	Down	3.93e-05	0.00020596	1.42711	Up	3.93e-05	0.00020596	0.601417	--	0.137983	0.251049	Similar to transcriptional regulatory protein algP.
Os04g0574500	0.99	0.273333	0.793333	0.406667	-1.85677	Down	0.0053201	0.0172148	1.53727	Up	0.0053201	0.0172148	0.573185	--	0.508147	0.653282	Similar to Growth-regulating factor 12.
Os12g0459100	14.18	4.37333	10.6433	5.68667	-1.69705	Down	0.00401809	0.0134642	1.28314	Up	0.00401809	0.0134642	0.37885	--	0.594148	0.725406	Similar to Transferase family protein.
Os01g0864000	5.63	1.75333	3.95667	3.25667	-1.68303	Down	0.00411693	0.013746	1.17419	Up	0.00411693	0.013746	0.893296	--	0.107438	0.206267	Plant-specific transcription factor A member of OVATE family protein Positive mediation of brassinosteroid signaling Plant growth and development
Os05g0188700	10.5367	3.3	7.69333	4.84333	-1.67488	Down	6.45e-07	4.51e-06	1.22114	Up	6.45e-07	4.51e-06	0.553534	--	0.0624743	0.133746	Leucine-rich repeat domain containing protein.
Os01g0880800	2.29667	0.73	3.5	0.99	-1.65357	Down	0.000244543	0.00109923	2.26139	Up	0.000244543	0.00109923	0.439532	--	0.724129	0.822484	Similar to Acyl-[acyl-carrier-protein] desaturase chloroplast precursor (EC 1.14.19.2) (Stearoyl-ACP desaturase).
Os12g0163700	11.4167	3.66333	9.01	0.656667	-1.63991	Down	0.00952871	0.0286141	1.29837	Up	0.00952871	0.0286141	-2.47992	--	1.98e-15	3.44e-14	Similar to Actin 7 (Actin 2).
Os01g0117200	13.93	4.55333	11.1633	3.86667	-1.6132	Down	9.44e-06	5.54e-05	1.29377	Up	9.44e-06	5.54e-05	-0.235833	--	0.0485821	0.108628	Similar to ARK protein (Fragment).
Os04g0196200	0.8	0.263333	0.486667	0.406667	-1.60311	Down	0.00186346	0.00680983	0.886044	Up	0.00186346	0.00680983	0.626957	--	0.574586	0.709491	Winged helix repressor DNA-binding domain containing protein.
Os06g0219900	0.9	0.296667	5.91333	0.2	-1.60108	Down	3.47e-05	0.000183843	4.31706	Up	3.47e-05	0.000183843	-0.568843	--	0.387008	0.540223	Similar to Phi-1 protein.
Os01g0929200	7.78333	2.58333	7.17	2.62667	-1.59115	Down	3.56e-08	2.93e-07	1.47274	Up	3.56e-08	2.93e-07	0.0239993	--	0.462284	0.612527	Serine/threonine protein kinase domain containing protein.
Os02g0696500	78.4033	26.44	54.11	31.2367	-1.56819	Down	2.94e-07	2.15e-06	1.03317	Up	2.94e-07	2.15e-06	0.240518	--	0.81505	0.88573	Concanavalin A-like lectin/glucanase domain containing protein.
Os05g0180300	25.4833	8.73	18.1333	11.3367	-1.5455	Down	4.38e-11	4.91e-10	1.05459	Up	4.38e-11	4.91e-10	0.376943	--	0.242155	0.385783	Leucine-rich repeat plant specific containing protein.
Os01g0111100	22.42	7.73667	19.6733	10.4933	-1.535	Down	0.00128689	0.0048764	1.34646	Up	0.00128689	0.0048764	0.439689	--	0.511022	0.655838	Cyclophilin-like domain containing protein.
Os03g0347900	22.4233	7.81	18.62	13.85	-1.52161	Down	2.41e-05	0.000131642	1.25346	Up	2.41e-05	0.000131642	0.826492	--	0.000653081	0.00254946	Terpenoid synthase domain containing protein.
Os07g0578333	2.16333	0.756667	1.98	1.38667	-1.51553	Down	0.00620099	0.0196999	1.38777	Up	0.00620099	0.0196999	0.873891	--	0.185357	0.315334	Conserved hypothetical protein.
Os05g0440900	1.23667	0.436667	5.93667	0.79	-1.50185	Down	0.00436485	0.0144718	3.76505	Up	0.00436485	0.0144718	0.85532	--	0.321637	0.474524	Protein of unknown function DUF623 plant domain containing protein.
Os02g0732200	12.0333	4.26333	8.92667	4.96667	-1.49698	Down	6.69e-08	5.31e-07	1.06614	Up	6.69e-08	5.31e-07	0.220296	--	0.898872	0.939681	Armadillo-like helical domain containing protein.
Os04g0381400	1.63	0.593333	1.37667	1.16333	-1.45796	Down	0.00206622	0.00746655	1.21426	Up	0.00206622	0.00746655	0.97135	--	0.112479	0.213619	Similar to OSIGBa0092E09.2 protein.
Os04g0689300	2.72333	0.993333	2.52333	1.37333	-1.45502	Down	4.06e-05	0.00021218	1.34498	Up	4.06e-05	0.00021218	0.467332	--	0.505096	0.650886	PLC-like phosphodiesterase TIM beta/alpha-barrel domain domain containing protein.
Os02g0756800	8.53333	3.13333	17.54	6.1	-1.44541	Down	2.45e-12	3.04e-11	2.48488	Up	2.45e-12	3.04e-11	0.961111	--	0.00158321	0.00561803	Phosphate-induced protein 1 conserved region family protein.
Os03g0709100	5.87	2.16667	5.7	2.80667	-1.43788	Down	0.000129906	0.000615016	1.39548	Up	0.000129906	0.000615016	0.373381	--	0.732447	0.828054	Uclacyanin (UCL) Phytocyanin family protein Regulation of photosynthesis and grain yield
Os07g0133500	14.27	5.27333	12.1633	8.10333	-1.4362	Down	4.4e-10	4.47e-09	1.20575	Up	4.4e-10	4.47e-09	0.6198	--	0.0462697	0.104335	Protein of unknown function DUF1005 family protein.
MSTRG.4027	1.22667	0.453333	1.77333	0.763333	-1.4361	Down	0.000538127	0.00224064	1.96782	Up	0.000538127	0.00224064	0.751741	--	0.319556	0.47244	--
Os10g0163370	2.01667	0.753333	3.12667	1.29	-1.42061	Down	6.29e-09	5.65e-08	2.05327	Up	6.29e-09	5.65e-08	0.776011	--	0.129815	0.239383	Lecithin:cholesterol acyltransferase family protein.
Os06g0115700	30.45	11.39	25.9133	12.6567	-1.41867	Down	0.000221197	0.00100395	1.18593	Up	0.000221197	0.00100395	0.15213	--	0.916189	0.949887	Conserved hypothetical protein.
Os03g0773000	32.1433	12.1167	30.4967	18.4367	-1.40753	Down	3.43e-18	6.55e-17	1.33166	Up	3.43e-18	6.55e-17	0.605585	--	0.003197	0.010493	Protein of unknown function DUF1005 family protein.
Os12g0616400	4.31	1.63333	4.13333	2.88333	-1.39987	Down	0.000675474	0.00274873	1.33949	Up	0.000675474	0.00274873	0.819918	--	0.0890885	0.177826	Similar to Isoform 2 of Transcription factor PCF8.
Os06g0695500	67.39	25.69	52.7533	25.3433	-1.39133	Down	4.23e-12	5.17e-11	1.03806	Up	4.23e-12	5.17e-11	-0.0196006	--	0.284826	0.43563	Similar to Peroxidase 16 precursor (EC 1.11.1.7) (Atperox P16) (ATP22a).
Os01g0594300	5.30667	2.05	4.21333	1.01	-1.37218	Down	0.0120682	0.0350372	1.03934	Up	0.0120682	0.0350372	-1.02127	--	0.000281836	0.00119684	Similar to leucine-rich repeat family protein / extensin family protein.
Os08g0469500	3.15	1.23	2.58667	1.65333	-1.35669	Down	0.00854897	0.0260789	1.07244	Up	0.00854897	0.0260789	0.426719	--	0.577957	0.712163	Similar to F-box domain containing protein.
Os05g0272200	1.82667	0.716667	2.38	1.35333	-1.34984	Down	0.000211717	0.000963547	1.73159	Up	0.000211717	0.000963547	0.917143	--	0.144412	0.26041	Similar to F20D23.27 protein.
Os06g0247000	6.82667	2.68667	6.67667	1.93333	-1.34536	Down	0.00273293	0.00959837	1.31331	Up	0.00273293	0.00959837	-0.474727	--	0.119449	0.224025	Similar to Avr9/Cf-9 rapidly elicited protein 231.
Os03g0304500	16.33	6.47	13.13	5.17333	-1.33569	Down	1.35e-08	1.17e-07	1.02103	Up	1.35e-08	1.17e-07	-0.322672	--	0.00626827	0.0188373	Tetratricopeptide-like helical domain containing protein.
Os03g0680700	2.15333	0.873333	2.23333	1.22667	-1.30197	Down	0.00482577	0.0158151	1.35459	Up	0.00482577	0.0158151	0.490139	--	0.577506	0.711741	Similar to Knotted1-interacting protein.
Os08g0502400	21.57	8.86	17.9433	6.77	-1.28365	Down	0.00879311	0.0267261	1.01807	Up	0.00879311	0.0267261	-0.388151	--	0.0574159	0.1248	FAS1 domain domain containing protein.
Os01g0296450	12.0267	5.01333	10.1167	3.45	-1.26239	Down	4.74e-08	3.85e-07	1.01289	Up	4.74e-08	3.85e-07	-0.539174	--	0.0146295	0.0393433	Hypothetical protein.
Os01g0232200	2.58333	1.09333	2.51333	1.44333	-1.2405	Down	0.00157824	0.00586331	1.20087	Up	0.00157824	0.00586331	0.400671	--	0.643648	0.764647	WD40 repeat domain containing protein.
MSTRG.10851	1.25	0.53	1.37667	1.01	-1.23786	Down	0.0109429	0.0322089	1.37712	Up	0.0109429	0.0322089	0.930291	--	0.123612	0.230355	PREDICTED: probable serine/threonine-protein kinase At1g54610 [Oryza sativa Japonica Group]
Os05g0191700	25.11	10.6467	23.66	12.9467	-1.23786	Down	0.000135049	0.000637181	1.15205	Up	0.000135049	0.000637181	0.282179	--	0.71819	0.818301	Similar to Stem 28 kDa glycoprotein.
Os10g0531900	1.06667	0.453333	4.53	0.863333	-1.23447	Down	0.0069125	0.021659	3.32087	Up	0.0069125	0.021659	0.929345	--	0.167941	0.29217	Similar to BZIP-like protein.
Os01g0854000	42.66	18.2667	42.0333	26.3167	-1.22367	Down	6.32e-16	1.03e-14	1.20232	Up	6.32e-16	1.03e-14	0.526763	--	0.0414938	0.0952878	Similar to AER.
Os07g0406800	5.53	2.42667	4.92	4.38667	-1.1883	Down	0.00142994	0.00536003	1.01968	Up	0.00142994	0.00536003	0.854149	--	0.00688074	0.0204132	DNA primase large subunit eukaryotic domain containing protein.
Os02g0178700	4.82333	2.12333	4.54	2.19	-1.1837	Down	0.0026408	0.00930478	1.09636	Up	0.0026408	0.00930478	0.0446	--	0.639207	0.7611	Helix-loop-helix DNA-binding domain containing protein.
Os10g0557700	2.25	0.996667	3.04333	1.79333	-1.17474	Down	1.7e-06	1.12e-05	1.61047	Up	1.7e-06	1.12e-05	0.847461	--	0.0735905	0.15258	Conserved hypothetical protein.
Os07g0684100	35.0133	15.62	48.63	27.85	-1.16451	Down	5.07e-19	1.02e-17	1.63845	Up	5.07e-19	1.02e-17	0.834283	--	0.00144316	0.00517393	Similar to Thioredoxin-like 1.
Os01g0207400	41.3433	18.58	39.5067	22.01	-1.1539	Down	1.95e-13	2.64e-12	1.08835	Up	1.95e-13	2.64e-12	0.244409	--	0.718469	0.818526	Similar to peptide-N4-asparagine amidase A.
Os11g0175700	8.63333	3.89	7.79	4.6	-1.15015	Down	6.51e-06	3.92e-05	1.00185	Up	6.51e-06	3.92e-05	0.241864	--	0.866859	0.92033	Similar to Transcription factor PCF3.
MSTRG.33483	2.00333	0.906667	0.82	0.786667	-1.14376	Down	0.0019215	0.00699213	-0.144948	Up	0.0019215	0.00699213	-0.20482	--	0.531254	0.673781	--
Os01g0635200	10.9467	4.99	14.44	3.88333	-1.13338	Down	2.37e-06	1.52e-05	1.53296	Up	2.37e-06	1.52e-05	-0.361744	--	0.171938	0.297455	Homeodomain-like containing protein.
Os01g0500400	4.12	1.88667	3.93333	3.45667	-1.1268	Down	0.00939042	0.0282656	1.05991	Up	0.00939042	0.0282656	0.873542	--	0.0173684	0.0456386	Conserved hypothetical protein.
Os02g0226600	3.1	1.42333	3.13	2.52	-1.12299	Down	0.00127643	0.00484235	1.13689	Up	0.00127643	0.00484235	0.82415	--	0.0189161	0.0491128	Homeodomain-related domain containing protein.
Os10g0499400	22.2133	10.2733	32.2367	12.2133	-1.11252	Down	4.27e-08	3.48e-07	1.6498	Up	4.27e-08	3.48e-07	0.249553	--	0.83653	0.900477	Cystathionine beta-synthase core domain containing protein.
Os01g0728100	43.85	20.3633	41.1567	15.06	-1.1066	Down	0.00134785	0.00508535	1.01515	Up	0.00134785	0.00508535	-0.435252	--	0.0163982	0.0434411	Lipase GDSL domain containing protein.
Os08g0119500	3.11	1.45333	4.82	2.44333	-1.09755	Down	6.26e-08	4.99e-07	1.72967	Up	6.26e-08	4.99e-07	0.749485	--	0.148883	0.26665	Methyltransferase type 11 domain containing protein.
Os09g0304500	2.48667	1.16667	2.54	1.28333	-1.09182	Down	0.000203979	0.000930865	1.12244	Up	0.000203979	0.000930865	0.137504	--	0.879654	0.928869	Protein of unknown function DUF247 plant family protein.
Os04g0360500	0.64	0.303333	1.14667	0.52	-1.07717	Down	3.17e-06	2e-05	1.91847	Up	3.17e-06	2e-05	0.777608	--	0.272457	0.421114	Similar to OSIGBa0111E13.1 protein.
Os01g0270300	29.2367	13.9667	44.14	19.3167	-1.06579	Down	1.44e-21	3.28e-20	1.6601	Up	1.44e-21	3.28e-20	0.467858	--	0.187184	0.317549	Similar to Cationic peroxidase isozyme 40K precursor.
Os02g0753300	99.49	47.79	97.0767	92.0433	-1.05784	Down	3.15e-10	3.26e-09	1.02242	Up	3.15e-10	3.26e-09	0.945604	--	2.98e-07	2.16e-06	Lipoxygenase LH2 domain containing protein.
Os05g0192100	26.11	12.5533	26.08	21.7267	-1.05653	Down	0.000244989	0.00110108	1.05487	Up	0.000244989	0.00110108	0.791396	--	4.41e-05	0.000221314	Similar to Stem 28 kDa glycoprotein.
Os05g0355300	13.33	6.45	13.3867	5.66333	-1.04731	Down	1.11e-05	6.45e-05	1.05343	Up	1.11e-05	6.45e-05	-0.187648	--	0.112415	0.213537	Similar to PIT1.
Os11g0153400	12.19	5.9	12.1133	7.56667	-1.04691	Down	7.14e-10	7.1e-09	1.03781	Up	7.14e-10	7.1e-09	0.358943	--	0.330324	0.483686	Similar to Rac GTPase activating protein 3 (Fragment).
Os09g0528700	5.52667	2.67667	8.78	3.57	-1.04597	Down	8.84e-18	1.64e-16	1.71378	Up	8.84e-18	1.64e-16	0.415487	--	0.530942	0.673518	Similar to Cytochrome p450 (CYP78A9).
Os11g0257800	2.25667	1.09667	2.91	0.786667	-1.04107	Down	0.000414692	0.00176914	1.40789	Up	0.000414692	0.00176914	-0.479301	--	0.118142	0.222113	Hypothetical protein.
Os03g0374500	1.32333	0.646667	1.39	0.95	-1.03308	Down	0.014454	0.0410077	1.10399	Up	0.014454	0.0410077	0.554905	--	0.39813	0.551417	Similar to calmodulin-binding family protein.
Os07g0250900	5.92	2.89333	9.19667	3.55333	-1.03286	Down	1.35e-11	1.58e-10	1.66838	Up	1.35e-11	1.58e-10	0.29644	--	0.790183	0.868628	Harpin-induced 1 domain containing protein.
Os03g0388900	39.86	19.51	46.83	30.2567	-1.03073	Down	5.97e-12	7.21e-11	1.26322	Up	5.97e-12	7.21e-11	0.633039	--	0.00194571	0.00675806	Peptidase C14 caspase catalytic domain containing protein.
Os05g0594500	54.5467	26.8167	65.8467	43.8	-1.02436	Down	2.85e-18	5.48e-17	1.29598	Up	2.85e-18	5.48e-17	0.707801	--	0.00603945	0.0182341	Invasin/intimin cell-adhesion domain containing protein.
Os10g0328600	3.71	1.83667	4.57667	1.31333	-1.01433	Down	0.000140093	0.000658141	1.31721	Up	0.000140093	0.000658141	-0.483857	--	0.135375	0.24751	Hypothetical protein.
Os03g0137800	6.17667	3.06667	6.78	5.46667	-1.01016	Down	4.75e-06	2.91e-05	1.14461	Up	4.75e-06	2.91e-05	0.83399	--	0.0251633	0.0624075	Cyclin-dependent kinase inhibitor family protein.
Os01g0580500	4.96	2.46667	5.85333	3.85667	-1.00778	Down	0.00110282	0.00425388	1.2467	Up	0.00110282	0.00425388	0.644792	--	0.196251	0.329547	ACC oxidase Ethylene biosynthesis
Os12g0438400	18.4967	9.22	27.3633	11.4767	-1.00443	Down	1.46e-24	3.82e-23	1.56941	Up	1.46e-24	3.82e-23	0.315865	--	0.486932	0.63507	Hypothetical conserved gene.
MSTRG.3378	2.56333	0.176667	5.36	1.4	-3.85892	Down	2.33e-13	3.14e-12	4.92313	Up	2.33e-13	3.14e-12	2.98633	--	0.0241617	0.0603141	PDI-like [Oryza sativa Japonica Group]
Os06g0714366	1.61333	0.22	1.73667	2.41333	-2.87447	Down	0.00218754	0.00785315	2.98075	Up	0.00218754	0.00785315	3.45545	--	0.182543	0.311657	Hypothetical protein.
Os02g0198000	0.39	0.06	0.486667	0.166667	-2.70044	Down	0.000980654	0.00383293	3.0199	Up	0.000980654	0.00383293	1.47393	--	0.262843	0.410418	Protein of unknown function DUF1677 Oryza sativa family protein.
Os11g0655900	3.24667	0.5	1.75	1.59	-2.69896	Down	1.76e-07	1.32e-06	1.80735	Up	1.76e-07	1.32e-06	1.66903	--	0.0185436	0.0482694	Thioredoxin fold domain containing protein.
Os06g0218800	1.79	0.39	1.86	0.87	-2.19841	Down	3.37e-05	0.000178952	2.25376	Up	3.37e-05	0.000178952	1.15754	--	0.182605	0.311738	Uncharacterised protein family UPF0503 domain containing protein.
Os08g0452500	5.27333	1.17	1.17333	2.93667	-2.17221	Down	2.83e-13	3.77e-12	0.0041044	Up	2.83e-13	3.77e-12	1.32767	--	0.00109264	0.00403846	Auxin responsive SAUR protein family protein.
Os04g0231800	0.846667	0.203333	1.46	0.756667	-2.05795	Down	3.83e-05	0.000201224	2.84405	Up	3.83e-05	0.000201224	1.89581	--	0.0326062	0.0776994	Conserved hypothetical protein.
Os07g0277200	7.91333	2.74333	6.87667	5.60667	-1.52836	Down	0.000456226	0.00192819	1.32578	Up	0.000456226	0.00192819	1.03121	--	0.0286427	0.0696561	Conserved hypothetical protein.
Os03g0105000	1.92667	0.686667	1.78	1.56333	-1.48843	Down	0.0148917	0.0420766	1.3742	Up	0.0148917	0.0420766	1.18694	--	0.0407822	0.0938663	Hypothetical protein.
Os09g0447300	0.69	0.27	1.60667	0.64	-1.35364	Down	1.11e-08	9.75e-08	2.57304	Up	1.11e-08	9.75e-08	1.24511	--	0.048355	0.108204	Cytochrome P450 family protein.
Os09g0455300	3.79	1.53667	4.53	3.19667	-1.30239	Down	0.00211354	0.00761848	1.55971	Up	0.00211354	0.00761848	1.05676	--	0.0597017	0.128907	Similar to INDEHISCENT protein.
Os02g0533700	1.85667	0.77	3.09667	1.6	-1.26978	Down	3.1e-07	2.26e-06	2.00779	Up	3.1e-07	2.26e-06	1.05514	--	0.0574186	0.1248	Conserved hypothetical protein.
Os02g0582600	5.23333	2.40333	3.5	8.83667	-1.12269	Down	0.00975893	0.029206	0.542318	Up	0.00975893	0.029206	1.87847	--	0.0507154	0.11263	Heavy metal transport/detoxification protein domain containing protein.
Os03g0362500	3.87333	1.84	4.52	4.03	-1.07387	Down	0.0102146	0.0303637	1.29662	Up	0.0102146	0.0303637	1.13107	--	0.069124	0.14525	Similar to Terpene synthase family metal binding domain containing protein expressed.
Os04g0619600	5.23333	2.51333	1.73667	5.27333	-1.05813	Down	0.0171842	0.0476758	-0.533281	Up	0.0171842	0.0476758	1.06911	--	0.0330947	0.0786647	Similar to Resistance protein candidate (Fragment).
Os01g0686300	0.146667	0.01	0.12	0.03	-3.87447	Down	0.00217545	0.00781679	3.58496	Up	0.00217545	0.00781679	1.58496	--	0.301577	0.453525	UDP-glucuronosyl/UDP-glucosyltransferase family protein.
