# Supplementary material for: Local and Systemic Response to Heterogeneous Sulfate Resupply after Sulfur Deficiency in Rice
Source: Int J Mol Sci. 2022 May 31;23(11):6203. doi: 10.3390/ijms23116203 (PMC9181796; doi:10.3390/ijms23116203)
Supplement: Supplementary file 1 [file ijms-23-06203-s001.zip › Table S7.xlsx]

## Sheet: Table S7
Table S7. Expression of genes involved in sulfate uptake, assimilation and metabolism under S deficiency and sulfate resupply
Protein family	Gene name	Gene ID	FPKM values									Expression patterm
			CK_Sh	S0_Sh	SR_Sh	SP_Sh	CK_R	S0_R	SR_R	SPSR_R	SPS0_R	S0_Sh/CK_Sh	SR_Sh/S0_Sh	SP_Sh/S0_Sh	S0_R/CK_R	SR_R/S0_R	SPSR_R/S0_R	SPS0_R/S0_R
Sulfate transporter	OsSultr1;1	Os03g0195800	0.273333	2.41667	1.11	1.22667	16.7	283.547	5.17333	5.67667	18.14	Up	--	--	Up	Down	Down	Down
	OsSultr1;2	Os03g0196000	0.583333	0.65	0.82	0.68	12.6467	1.93	7.78333	1.31667	1.35	--	--	--	Down	--	--	--
	OsSultr1;3	Os08g0406400	47.4633	62.2867	32.84	50.5633	15.3233	12.16	12.9233	11.7233	14.9933	--	--	--	--	--	--	--
	OsSultr2;1	Os03g0195450	11.3233	18.7467	9.98333	9.55	9.48667	8.51667	3.88	2.31667	7.10333	--	--	--	--	--	--	--
	OsSultr2;2	Os03g0195300	15.4333	6.42667	3.64667	4.23333	2.15333	2.16	2.18	2.81	2.55	Up	--	--	--	--	--	--
	OsSultr3;1	Os10g0420400	1.93	1.56667	0.856667	0.386667	0.18	0.04	0.236667	0.106667	0.0633333	--	--	--	Down
	OsSultr3;2	Os03g0161200	313.087	334.683	34.0433	117.187	26.37	17.4333	11.4667	11.9033	9.61	--	--	--	--	--	--	--
	OsSultr3;3	Os04g0652400	94.8933	71.0567	27.5367	14.4633	0.6	0.496667	0.736667	0.323333	0.626667	--	--	--	--	--	--	--
	OsSultr3;4	Os06g0143700	11.25	20.2467	16.0433	16.8833	12.3433	10.9467	4.52333	6.95333	9.16333	--	--	--	--	--	--	--
	OsSultr3;5	Os01g0593700	0	0	0	0	0.18	0.166667	0	0.333333	0.41	--	--	--	--	--	--	--
	OsSultr3;6	Os01g0719300	12.0567	14.8167	15.9467	20.0267	19.72	26.5933	20.7533	23.98	24.75	--	--	--	--	--	--	--
	OsSultr4;1	Os09g0240500	38.85	48.8633	20.4367	23.7367	21.8567	43.6533	17.86	16.5333	25.32	--	--	--	--	--	--	--
ATP sulfurylase	OsATPS1	Os03g0743900	67.95	149.94	102.347	100.663	362.353	447.203	195.747	187.003	361.297	Up	--	--	--	--	--	--
	OsATPS2	Os04g0111200	42.28	145.507	39.7367	39.8	23.2033	25.7833	13.01	16.26	25.38	--	--	--	--	--	--	--
APS kinase	APK	Os03g0202001	20.73	10.2867	5.99667	5.3	6.91667	1.40667	5	1.83333	1.26	Down	--	--	Down	Up	--	--
	APK	Os07g0573100	24.7433	23.35	23.37	27.5033	14.2333	13.9167	12.87	7.95	9.82667	--	--	--	--	--	--	--
	APK	Os11g0634800	2.15667	2.11667	1.84333	2.42	16.4967	17.1967	21.14	11.49	8.54333	--	--	--	--	--	--	--
APS reductase	OsAPRL1	Os07g0509800	117.833	309.13	65.7133	99.71	144.467	226.387	72.7167	122.973	198.39	Up	Down	Down	--	--	--	--
	OsAPRL2	Os06g0220800	10.1433	11.26	21.3867	22.3167	24.13	40.4533	33.1833	32.4267	26.2333	--	--	--	--	--	--	--
	OsAPRL3	Os02g0754900	42.8667	44.9567	46.6567	48.6933	33.7833	35.35	35.6433	39.69	39.2267	--	--	--	--	--	--	--
	OsAPRL4	Os08g0412401	12.7033	15.4833	16.9533	16.24	20.38	23.0667	23.4333	25.81	26.3333	--	--	--	--	--	--	--
	OsAPRL5	Os03g0806500	26.4533	21.4467	25.7267	32.2	22.6733	22.0633	23.0967	19.31	17.9067	--	--	--	--	--	--	--
Sulfite reductase	SiR	Os05g0503300	45.0433	61.1733	119.467	89.6333	30.5533	56.8	38.47	40.0333	53.45	--	--	--	--	--	--	--
Serine hydroxymethyltransferase	OsSHM1	Os03g0738400	1409.63	1082.03	688.673	472.07	385.283	216.437	273.28	139.747	132.433	--	--	--	--	--	--	--
	OsSHM2	Os11g0455800	397.883	431.483	316.653	260.96	600.607	426.433	573.147	466.247	495.77	--	--	--	--	--	--	--
	OsSHM3	Os12g0409000	18.31	31.1167	54.0467	55.3233	28.5267	65.79	46.4433	50.9133	64.69	--	--	--	Up	--	--	--
	OsSHM4/OsCADT1	Os01g0874900	21.94	41.3833	25.29	28.94	24.8233	46.74	25.3333	23.55	38.4133	--	--	--	--	--	--	--
	OsSHM5	Os05g0429000	6.73667	6.56	7.53333	5.62667	6.80667	8.24	8.55667	9.27	9.11667	--	--	--	--	--	--	--
Serine acetyltransferase	SAT	Os03g0185000	0.123333	0.0233333	0.28	0.453333	0.49	0.903333	1.35	2.33	1.48667	Down	Up	Up	--	--	--	--
	SAT	Os03g0196600	4.41	7.29333	7.76667	4.59	1.60333	15.1767	7.84	8.36	15.3333	--	--	--	Up	--	--	--
	SAT	Os05g0533500	22.8533	42.7933	12.9433	18.7133	21.17	36.0433	16.58	16.87	22.8533	--	--	--	--	--	--	--
	SAT	Os03g0133900	26.6133	25.73	16.6933	18.45	12.23	11.8433	11.6867	13.6167	12.8167	--	--	--	--	--	--	--
	SAT	Os01g0720700	12.5267	8.56	3.11667	7.79333	9.93	9.43	5.99667	5.89667	3.44667	--	--	--	--	--	--	--
O-acetylserine(thiol)lyase	OAS-TL	Os06g0564700	1.23667	0.59	2.90333	3.42333	3.31	1.09	3.48667	2.35333	2.84667	Down	Up	Up	Down	Up	Up	Up
	OsASTOL1/OsRCS1	Os12g0625000	82.7733	184.113	224.26	217.943	190.373	500.383	250.807	285.08	408.393	Up	--	--	Up	--	--	--
	OAS-TL	Os06g0149700	0.38	0.49	0.34	0.0633333	12.0267	5.6	12.14	8.82	7.27	--	--	--	Down	Up	--	--
	OAS-TL	Os04g0165700	62.6267	79.1633	78.0467	70.4867	140.15	61.5733	58.1	52.5533	47.52	--	--	--	Down	--	--	--
	OAS-TL	Os06g0564500	52.4	42.69	53.1433	44.9833	2.64333	1.26333	1.89333	0.913333	0.776667	--	--	--	Down	--	--	--
	OAS-TL	Os03g0215800	8.08	9.54667	10.7367	10.15	13.16	16.18	13.4467	14.7667	18.96	--	--	--	--	--	--	--
	OAS-TL	Os01g0814800	4.94333	4.38	11.0267	10.6767	1.84	1.10667	0.823333	0.586667	0.613333	--	--	--	--	--	--	--
	OsOASTL-A1/OsRCS3	Os03g0747800	41.4767	49.1133	60.3533	54.5933	80.13	80.6033	99.8933	88.5167	85.5233	--	--	--	--	--	--	--
	OAS-TL	Os06g0149900	34.38	42.7933	41.3833	33.8967	41.9133	26.5967	29.7767	37.9567	34.4767	--	--	--	--	--	--	--
	OAS-TL	Os01g0978100	220.75	206.48	164.69	149.9	85.1967	70.2667	47.9133	44.68	41.36	--	--	--	--	--	--	--
Cystathionine gamma-synthase	CGS	Os03g0376100	102.307	102.963	78.3033	51.7367	119.3	69.2167	82.0567	56.13	51.7433	--	--	--	--	--	--	--
Cystathionine beta-lyase	CBL1	Os06g0175800	4.76333	4.64	9.03667	8.23667	9.63667	7.73	7.97667	7.37333	6.63	--	--	--	--	--	--	--
	CBL2	Os06g0176900	3.61333	3.71333	6.71667	6.23333	7.03333	5.85333	5.95667	5.93333	4.83	--	--	--	--	--	--	--
Methionine synthase	MS1	Os12g0623900	706.96	928.937	474.2	426.78	1257.15	803.913	775.533	638.193	676.147	--	--	--	--	--	--	--
	MS2	Os12g0624000	363.613	514.557	330.557	303.733	407.96	399.633	431.717	368.397	425.123	--	--	--	--	--	--	--
Gutathione synthetase	GSHS1	Os11g0642800	13.98	15.5033	9.96	12.36	8.93667	8.08333	8.82667	8.39	8.50667	--	--	--	--	--	--	--
	GSHS2	Os05g0129000	56.4733	61.17	53.9967	74.5667	71.88	61.3	53.6033	35.7433	36.8833	--	--	--	--	--	--	--
