# Supplementary material for: Local and Systemic Response to Heterogeneous Sulfate Resupply after Sulfur Deficiency in Rice
Source: Int J Mol Sci. 2022 May 31;23(11):6203. doi: 10.3390/ijms23116203 (PMC9181796; doi:10.3390/ijms23116203)
Supplement: Supplementary file 1 [file ijms-23-06203-s001.zip › Table S8.xlsx]

## Sheet: Sheet1
Table S8. Primers used for qRT-PCR
Gene name	Gene ID	Forward Primer (5'-3')	Reverse Primer (5'-3')
ATPS	Os04g0111200	GGGTGGAAATATACCCTCACAA	TCAATCACTTCCAGATCACCAC
APR	Os07g0509800	CTGTTCGACAAGGTGGAGAAG	CGTCCTCGTAGAAGGAGAAGAG
Met synthase	Os12g0624000	GAGATGACCAAGTGGTTTGACA	CTTGGCCTCCTTGTATTCATTC
OsRLCK253	Os08g0374701	GTAAGCTGCGACGAGGTAGAGT	TCAGAAGCTCTAGCATCACGAC
DUF1677	Os02g0198000	CTGCTCGTGTCCGTGAATAA	GGAGCGGATGAGACTAGACG
Thaumatin	Os07g0417600	GAGCCAGTACTCCAAGTTCTTCA	GGGCAGAAGGTGATTTGGTAG
OsSULTR1;1	Os03g0195800	CGTCATCGCACAGCCACAT	TTGTACTGCCGCAACGGGTC
OsSDI1	Os03g0165900	GACTCCCTCGACAACATCCTC	TCGCCAGGTAGATCTTCCG
OsABCB5	Os01g0695800	GTGGGCAAAAACAGAGGGTA	TTGACCATGACTCGATCCAA
Protein kinase	Os01g0694000	TTCTTCCAATCGATTTTCTGGT	GCAAAGGACTTTGGAATTGTTC
DUF259	Os01g0660700	TTCAGGTTGGATGATGATCTTG	AAGGTCTCTTGCAATTGGAGTC
OsSULTR1;2	Os03g0196000	CACTGGCCCATACTTGCTCA	ACCTCCAGCCATGCAATTGA
OsActin	Os03g0718100	GACTCTGGTGATGGTGTCAGC	GGCTGGAAGAGGACCTCAGG
